# Supplementary material for: Flower/FLWR-1 regulates neuronal activity via the plasma membrane Ca2+ ATPase to promote recycling of synaptic vesicles
Source: eLife. 2025 May 20;13:RP103870. doi: 10.7554/eLife.103870 (PMC12092002; doi:10.7554/eLife.103870)
Supplement: Figure 1—figure supplement 1—source data 1. [file elife-103870-fig1-figsupp1-data1.xlsx]

## Sheet: FigS1_1A
wild type	flwr-1
1.03143	1.00609
0.937177	1.05032
1.04519	0.963268
1.05939	0.979999
0.961679	0.980907
1.01104	1.00826
0.956857	0.980953
1.06575	1.07113
1.04109	1.04606
1.03712	1.07468
1.05905	1.05552
1.05705	1.11427
1.01795	1.05349
0.997287	1.09653
1.04957	1.02016
1.01195	1.01046
0.978982	1.00028
0.96636	1.10697
1.00676	1.04186
1.02319	0.987815
0.967092	1.04649
0.987399
	1.07423
1.01924	1.04586
0.975273	0.982773
1.01699	1.03774
1.07374	1.04216
1.03131	0.955824
0.978902
1.11651

## Sheet: FigS1_1B
wild type	flwr-1
188	150
198	163
178	39
193	138
176	117
118	39
120	133
103	105
162	100
152
161
226	163
38	160
127	103
180	153
155	174
195	59
221	52
194	98
162	137

## Sheet: FigS1_1C
Time (s)	wild type			flwr-1			flwr-1 + pflwr-1::FLWR-1
1	0	0		0	0		0	0
2	0	0		0	0		0	0
3	0	0		0	0		0	0
4	0	0		0	0		0	0
5	0	0		0	0		0	0.151
6	0.1034	0		0.0668	0.125		0.1661	0.1593
7	0.1282	0.1245		0.0999	0.117		0.1419	0.1306
8	0.119	0.1004		0.0943	0.112		0.1168	0.1055
9	0.1134	0.1039		0.0868	0.0988		0.1126	0.1098
10	0.1153	0.1079		0.1	0.1097		0.1137	0.1083
11	0.1158	0.1091		0.1141	0.1115		0.1117	0.1022
12	0.1149	0.0929		0.1103	0.1104		0.108	0.0983
13	0.138	0.0995		0.0959	0.1053		0.1176	0.0991
14	0.1295	0.1057		0.0822	0.0982		0.1125	0.0955
15	0.1135	0.0993		0.08	0.1094		0.1199	0.1022
16	0.1118	0.1023		0.0859	0.0961		0.1018	0.104
17	0.125	0.1057		0.0975	0.1079		0.1113	0.1074
18	0.1194	0.1003		0.0946	0.1131		0.1087	0.1023
19	0.1236	0.1029		0.0932	0.1073		0.103	0.0984
20	0.1173	0.0975		0.1154	0.1116		0.1155	0.1006
21	0.1115	0.105		0.0961	0.1033		0.1068	0.1015
22	0.1108	0.0979		0.0885	0.1073		0.1067	0.0869
23	0.1077	0.0937		0.0958	0.1042		0.1033	0.1141
24	0.1184	0.0909		0.0885	0.1017		0.0863	0.1165
25	0.1083	0.0806		0.091	0.1139		0.0925	0.1044
26	0.1092	0.0873		0.0899	0.12		0.1027	0.0966
27	0.1208	0.0921		0.1021	0.117		0.0991	0.0993
28	0.1196	0.0873		0.1089	0.1279		0.1092	0.1069
29	0.1252	0.0827		0.0974	0.1115		0.0963	0.1117
30	0.1187	0.0896		0.0914	0.1126		0.099	0.0918
31	0.1195	0.0955		0.0971	0.1202		0.1018	0.092
32	0.1106	0.0765		0.0957	0.1126		0.0989	0.0839
33	0.1079	0.0837		0.0772	0.1275		0.0973	0.0871
34	0.1057	0.0882		0.0882	0.1194		0.0955	0.0953
35	0.1121	0.0866		0.0944	0.1269		0.0861	0.0864
36	0.1085	0.0872		0.0952	0.1125		0.0859	0.0742
37	0.1078	0.0936		0.0892	0.1046		0.0886	0.0921
38	0.1106	0.0917		0.0808	0.1011		0.1013	0.0815
39	0.1159	0.0981		0.0806	0.1038		0.0861	0.0876
40	0.1189	0.107		0.0846	0.1084		0.0841	0.098
41	0.1267	0.0923		0.0786	0.1017		0.0757	0.094
42	0.104	0.0952		0.0892	0.1047		0.0813	0.101
43	0.1059	0.0908		0.1117	0.112		0.0882	0.1057
44	0.1098	0.0926		0.1039	0.1083		0.0901	0.0913
45	0.111	0.0979		0.0968	0.1063		0.0819	0.1085
46	0.1108	0.0937		0.1056	0.1019		0.0966	0.1151
47	0.1079	0.0855		0.1	0.1021		0.0991	0.1049
48	0.1105	0.0872		0.0946	0.1166		0.0946	0.1139
49	0.1071	0.076		0.0942	0.1226		0.093	0.1124
50	0.1155	0.0851		0.1029	0.1		0.0931	0.1051
51	0.1109	0.0819		0.0952	0.1026		0.0996	0.1126
52	0.1106	0.0891		0.0955	0.1189		0.0884	0.1129
53	0.1005	0.0956		0.0975	0.0914		0.0951	0.1061
54	0.1064	0.0969		0.1106	0.097		0.1053	0.1209
55	0.1113	0.1061		0.0979	0.1033		0.0949	0.1086
56	0.1091	0.0868		0.1035	0.1026		0.0833	0.1113
57	0.111	0.1001		0.0928	0.1013		0.0851	0.1251
58	0.1056	0.0936		0.0897	0.101		0.0823	0.1112
59	0.1072	0.0982		0.0993	0.1012		0.0842	0.0978
60	0.107	0.102		0.1021	0.1038		0.0865	0.1027
61	0.1051	0.104		0.1002	0.1037		0.0934	0.1092
62	0.1054	0.0985		0.1048	0.1104		0.0951	0.1137
63	0.1202	0.1062		0.1064	0.1115		0.0985	0.1126
64	0.1099	0.1088		0.0991	0.1074		0.0955	0.1114
65	0.095	0.1016		0.097	0.1139		0.095	0.0965
66	0.1007	0.0859		0.0805	0.1098		0.1001	0.112
67	0.1033	0.099		0.0925	0.1003		0.1135	0.1112
68	0.1003	0.1021		0.0889	0.1047		0.1143	0.1149
69	0.0949	0.0979		0.0816	0.1045		0.1017	0.1042
70	0.0942	0.0912		0.0978	0.116		0.0989	0.0986
71	0.0968	0.069		0.0988	0.0929		0.0964	0.1129
72	0.109	0.0924		0.0956	0.088		0.096	0.1068
73	0.1199	0.0984		0.0915	0.1118		0.1065	0.108
74	0.1182	0.0859		0.0913	0.1081		0.088	0.0913
75	0.1162	0.0693		0.0906	0.1024		0.0939	0.0969
76	0.1063	0.0758		0.0992	0.1037		0.0989	0.1027
77	0.1066	0.0715		0.0966	0.1099		0.0872	0.0932
78	0.1152	0.0709		0.0902	0.1096		0.0765	0.0932
79	0.1228	0.074		0.0838	0.1203		0.0735	0.0983
80	0.1219	0.087		0.088	0.1103		0.0754	0.1002
81	0.118	0.0861		0.0947	0.1076		0.0879	0.1038
82	0.13	0.1013		0.1131	0.1154		0.097	0.1004
83	0.1269	0.0992		0.08	0.1178		0.1051	0.0954
84	0.1075	0.0834		0.0858	0.1177		0.1161	0.0844
85	0.1055	0.0779		0.085	0.108		0.0937	0.09
86	0.1025	0.0839		0.0825	0.1133		0.1018	0.1106
87	0.1003	0.0669		0.0687	0.1116		0.1037	0.0979
88	0.0947	0.095		0.0876	0.1147		0.1085	0.1127
89	0.0923	0.0934		0.0897	0.09		0.0959	0.1016
90	0.1011	0.091		0.0839	0.1058		0.0893	0.1023
91	0.1167	0.0975		0.0921	0.098		0.0945	0.1027
92	0.1125	0.0962		0.0862	0.107		0.097	0.1039
93	0.1117	0.0918		0.0867	0.0981		0.0877	0.1103
94	0.1168	0.0959		0.09	0.0993		0.0895	0.1109
95	0.1163	0.0884		0.0801	0.1092		0.0832	0.1052
96	0.1253	0.0893		0.0978	0.1006		0.0798	0.1083
97	0.1198	0.0881		0.1089	0.1064		0.0851	0.111
98	0.1084	0.096		0.0929	0.0987		0.081	0.1079
99	0.1102	0.1072		0.0869	0.0823		0.0817	0.0981
100	0.1113	0.1055		0.0879	0.093		0.0897	0.1049
101	0.1073	0.098		0.095	0.0949		0.0849	0.1089
102	0.1136	0.0937		0.0818	0.1211		0.0572	0.1086
103	0.1156	0.0961		0.0958	0.1325		0.0737	0.1102
104	0.1051	0.0891		0.103	0.1185		0.1017	0.1012
105	0.1157	0.0885		0.0954	0.1008		0.0946	0.1016
106	0.1133	0.0961		0.0969	0.1035		0.0997	0.1065
107	0.1271	0.0984		0.0968	0.0999		0.0945	0.1235
108	0.1232	0.0927		0.101	0.1031		0.0985	0.1111
109	0.1089	0.1037		0.0932	0.092		0.1033	0.1058
110	0.1124	0.0981		0.0911	0.0901		0.0901	0.0889
111	0.1188	0.0993		0.1042	0.0908		0.1048	0.1047
112	0.1037	0.1077		0.1033	0.098		0.0949	0.1083
113	0.1069	0.1094		0.0926	0.0936		0.0795	0.1051
114	0.1004	0.1179		0.1029	0.1008		0.0843	0.0951
115	0.0976	0.114		0.1207	0.1046		0.0944	0.1088
116	0.0997	0.1111		0.1075	0.1004		0.0771	0.1091
117	0.1114	0.1056		0.1074	0.1087		0.0638	0.1017
118	0.1147	0.0941		0.1046	0.1314		0.0804	0.1049
119	0.096	0.0824		0.0882	0.1109		0.0766	0.1033
120	0.0996	0.0884		0.0978	0.1156		0.0752	0.0933
121	0.1086	0.0777		0.096	0.1237		0.0888	0.0976
122	0.1084	0.0785		0.091	0.1121		0.0682	0.1067
123	0.1062	0.0966		0.0819	0.1083		0.0742	0.1033
124	0.1038	0.1024		0.0774	0.1123		0.0925	0.1094
125	0.1103	0.1047		0.0809	0.1145		0.0807	0.1047
126	0.1147	0.1035		0.0744	0.132		0.0797	0.0984
127	0.126	0.0949		0.0755	0.1198		0.0978	0.0981
128	0.1204	0.0985		0.0786	0.1178		0.0811	0.0993
129	0.109	0.091		0.0965	0.106		0.0889	0.1056
130	0.1098	0.0935		0.0809	0.1013		0.0867	0.0961
131	0.1275	0.0992		0.1051	0.1086		0.0891	0.0755
132	0.1168	0.0982		0.0936	0.1015		0.1015	0.092
133	0.1097	0.0958		0.0976	0.0927		0.0985	0.1037
134	0.1098	0.0924		0.0899	0.093		0.0953	0.095
135	0.1079	0.0969		0.0767	0.0968		0.0858	0.0949
136	0.108	0.0979		0.0836	0.1013		0.0869	0.0997
137	0.1044	0.0936		0.0877	0.1055		0.0949	0.1077
138	0.1169	0.0944		0.0892	0.1124		0.1054	0.1026
139	0.1194	0.1038		0.0862	0.1014		0.0814	0.1097
140	0.1191	0.0941		0.0805	0.1194		0.093	0.1056
141	0.1172	0.0879		0.0882	0.1129		0.1025	0.1074
142	0.1266	0.078		0.0914	0.119		0.1005	0.1049
143	0.1168	0.1047		0.0924	0.1229		0.1036	0.1081
144	0.1075	0.0943		0.0826	0.1236		0.0765	0.1161
145	0.1289	0.1021		0.0865	0.1241		0.0945	0.1202
146	0.1255	0.1062		0.0804	0.1012		0.089	0.111
147	0.1292	0.1107		0.0961	0.1069		0.0799	0.1156
148	0.1211	0.1163		0.1022	0.1092		0.0792	0.1007
149	0.1223	0.1077		0.1022	0.1221		0.0797	0.1109
150	0.1144	0.1029		0.0901	0.1168		0.0878	0.1089
151	0.1026	0.0938		0.1048	0.1086		0.0858	0.1079
152	0.0987	0.0874		0.1077	0.1307		0.0855	0.0996
153	0.1032	0.0905		0.0962	0.1274		0.0803	0.1004
154	0.1065	0.0926		0.085	0.1206		0.0916	0.096
155	0.1053	0.0882		0.0764	0.1149		0.0838	0.1006
156	0.1044	0.0776		0.0899	0.1253		0.0828	0.1017
157	0.115	0.0799		0.07	0.1181		0.0834	0.0958
158	0.1129	0.092		0.0741	0.1153		0.0893	0.105
159	0.1125	0.0889		0.0753	0.1214		0.1052	0.1136
160	0.1144	0.0772		0.0821	0.114		0.1004	0.1007
161	0.1102	0.081		0.0862	0.1145		0.0986	0.1177
162	0.0993	0.0869		0.0847	0.1121		0.0931	0.1218
163	0.1053	0.0928		0.0882	0.1149		0.0867	0.111
164	0.1052	0.087		0.0948	0.1162		0.0984	0.1203
165	0.0961	0.076		0.0905	0.1074		0.1147	0.1063
166	0.1017	0.0837		0.1056	0.1013		0.1083	0.108
167	0.1082	0.0809		0.0883	0.1204		0.0958	0.1116
168	0.1047	0.0834		0.0747	0.1177		0.0677	0.1142
169	0.1062	0.0943		0.0914	0.1051		0.0865	0.1231
170	0.1052	0.0994		0.0852	0.1055		0.0975	0.1223
171	0.1085	0.1057		0.1053	0.1149		0.089	0.1201
172	0.1127	0.1024		0.0936	0.1018		0.0913	0.1159
173	0.1157	0.1023		0.1009	0.1095		0.1012	0.1147
174	0.114	0.1072		0.1141	0.1079		0.0984	0.1061
175	0.1121	0.0917		0.1004	0.1125		0.1072	0.0996
176	0.1156	0.0936		0.1	0.1214		0.12	0.0917
177	0.1198	0.0979		0.0975	0.1095		0.1111	0.0971
178	0.1155	0.0933		0.0841	0.1007		0.1157	0.1099
179	0.1084	0.1026		0.095	0.1009		0.1172	0.106
180	0.1138	0.1033		0.0896	0.1143		0.1101	0.1008
181	0.1149	0.1086		0.105	0.108		0.1131	0.0915
182	0.1047	0.0978		0.111	0.1126		0.1057	0.1045
183	0.1048	0.097		0.1007	0.1194		0.102	0.1024
184	0.1148	0.099		0.1043	0.1334		0.0957	0.1164
185	0.1107	0.0964		0.1065	0.1169		0.1038	0.0919
186	0.1146	0.0922		0.1074	0.1155		0.0895	0.1141
187	0.1068	0.0932		0.1027	0.1233		0.0844	0.1125
188	0.1164	0.0943		0.1034	0.112		0.0747	0.1112
189	0.1042	0.0906		0.0996	0.1215		0.082	0.1139
190	0.0996	0.1006		0.1097	0.1167		0.0787	0.1052
191	0.1082	0.0976		0.1077	0.1085		0.0651	0.1167
192	0.1042	0.0926		0.1085	0.1185		0.1089	0.1199
193	0.1047	0.0966		0.1038	0.1273		0.1031	0.1209
194	0.1021	0.0911		0.1179	0.114		0.1146	0.1221
195	0.1008	0.0926		0.101	0.1118		0.0927	0.1217
196	0.1016	0.0949		0.0926	0.1063		0.1023	0.1181
197	0.1098	0.0852		0.091	0.1131		0.0963	0.1104
198	0.1068	0.0912		0.0907	0.1148		0.0913	0.1161
199	0.1162	0.0901		0.0905	0.1299		0.0949	0.1144
200	0.1172	0.0831		0.0925	0.128		0.1047	0.1071
201	0.1282	0.0774		0.091	0.1188		0.0894	0.1107
202	0.1228	0.077		0.0892	0.1169		0.1021	0.1048
203	0.1261	0.0906		0.1102	0.1141		0.1178	0.0985
204	0.1222	0.0967		0.0852	0.1116		0.1046	0.1045
205	0.1075	0.0791		0.0919	0.1242		0.0879	0.1044
206	0.1036	0.0979		0.1071	0.1363		0.0937	0.1033
207	0.1008	0.0955		0.1083	0.1228		0.0833	0.0761
208	0.1034	0.0931		0.1252	0.1268		0.089	0.0842
209	0.1006	0.0968		0.1114	0.1107		0.0978	0.0806
210	0.1213	0.08		0.1083	0.1153		0.093	0.0811
211	0.1051	0.0717		0.1022	0.1259		0.0945	0.0904
212	0.0947	0.0669		0.0916	0.1279		0.0935	0.0998
213	0.095	0.0713		0.0917	0.1173		0.0864	0.1052
214	0.1069	0.0781		0.1022	0.1176		0.0797	0.1294
215	0.094	0.0754		0.107	0.1337		0.0996	0.1128
216	0.1042	0.0695		0.1125	0.1446		0.0922	0.1091
217	0.0876	0.0781		0.1101	0.1299		0.0907	0.1023
218	0.1097	0.0818		0.111	0.1192		0.0841	0.0933
219	0.0882	0.0885		0.094	0.109		0.1034	0.1019
220	0.0855	0.088		0.0944	0.114		0.0929	0.093
221	0.1031	0.0923		0.0964	0.1127		0.0819	0.0896
222	0.1034	0.0851		0.0912	0.1169		0.0778	0.0967
223	0.1018	0.0915		0.081	0.1351		0.0742	0.0891
224	0.0985	0.0786		0.0906	0.1264		0.0771	0.0952
225	0.1128	0.0845		0.0839	0.1248		0.0997	0.0984
226	0.1057	0.1011		0.0948	0.1118		0.0948	0.0972
227	0.0979	0.1045		0.0919	0.1184		0.0908	0.1072
228	0.0946	0.1048		0.0737	0.1152		0.0966	0.1006
229	0.1065	0.0953		0.0839	0.1038		0.0905	0.1124
230	0.1134	0.1038		0.0886	0.1061		0.0969	0.1012
231	0.115	0.1016		0.0801	0.1174		0.0972	0.1052
232	0.1078	0.0995		0.0819	0.1116		0.0996	0.0996
233	0.1009	0.0971		0.0883	0.1189		0.0999	0.1145
234	0.0975	0.0823		0.096	0.1055		0.0914	0.1153
235	0.1114	0.0901		0.0938	0.1058		0.0843	0.0934
236	0.1017	0.0771		0.097	0.1132		0.0907	0.0868
237	0.0956	0.0848		0.103	0.1126		0.0798	0.1004
238	0.094	0.0876		0.0985	0.1136		0.1063	0.0899
239	0.0972	0.0922		0.0925	0.122		0.0809	0.0935
240	0.1062	0.0911		0.0828	0.1333		0.0765	0.088
241	0.0991	0.0954		0.0847	0.1119		0.0785	0.0972
242	0.096	0.0942		0.0974	0.124		0.0787	0.104
243	0.0923	0.0983		0.0839	0.1263		0.0764	0.0989
244	0.0948	0.103		0.0859	0.1211		0.0687	0.1051
245	0.095	0.0986		0.0849	0.1165		0.0734	0.1162
246	0.1065	0.0976		0.114	0.1355		0.0806	0.101
247	0.1045	0.1055		0.0943	0.1305		0.0789	0.1074
248	0.0912	0.101		0.0838	0.1304		0.0705	0.1056
249	0.0984	0.1042		0.0902	0.126		0.0795	0.1034
250	0.0992	0.1085		0.1008	0.1134		0.0791	0.1077
251	0.0865	0.1076		0.09	0.1175		0.0789	0.1036
252	0.0984	0.1059		0.0967	0.1002		0.0724	0.1028
253	0.0887	0.1163		0.1112	0.0862		0.0713	0.0919
254	0.1022	0.0907		0.1025	0.101		0.0839	0.0904
255	0.0915	0.0917		0.1079	0.1003		0.0865	0.0923
256	0.1	0.1025		0.1043	0.1062		0.0852	0.0924
257	0.0926	0.092		0.0966	0.1135		0.0812	0.0937
258	0.095	0.086		0.0978	0.1225		0.0842	0.1035
259	0.0969	0.0936		0.1055	0.1264		0.0872	0.1076
260	0.092	0.1029		0.1028	0.1082		0.0838	0.1074
261	0.0843	0.1027		0.1052	0.1127		0.084	0.1094
262	0.092	0.1054		0.1035	0.1208		0.0817	0.1032
263	0.0887	0.1111		0.0992	0.1222		0.0789	0.102
264	0.082	0.1041		0.1075	0.118		0.1138	0.0955
265	0.0951	0.1062		0.1041	0.125		0.1151	0.0963
266	0.0838	0.1004		0.0884	0.1238		0.0992	0.0962
267	0.0785	0.0995		0.0978	0.1238		0.0816	0.1154
268	0.0958	0.1064		0.0937	0.1237		0.0815	0.1038
269	0.0824	0.1082		0.082	0.1288		0.0837	0.1104
270	0.0797	0.0989		0.0719	0.1192		0.0929	0.1143
271	0.0828	0.1136		0.0876	0.1032		0.0775	0.1221
272	0.0901	0.1134		0.099	0.1036		0.073	0.1089
273	0.0936	0.1053		0.0995	0.1053		0.073	0.1022
274	0.0947	0.1128		0.0975	0.1009		0.0776	0.1097
275	0.0954	0.1129		0.1109	0.1063		0.0752	0.1107
276	0.1058	0.1154		0.0986	0.1045		0.0996	0.0874
277	0.0969	0.114		0.1005	0.1142		0.0974	0.0947
278	0.0978	0.108		0.0896	0.1171		0.0917	0.0938
279	0.0905	0.1074		0.0982	0.1116		0.0929	0.0917
280	0.0989	0.1043		0.0908	0.1073		0.0915	0.096
281	0.0944	0.1084		0.1054	0.1112		0.0886	0.0848
282	0.0937	0.1043		0.092	0.1153		0.0881	0.0896
283	0.0873	0.1046		0.0913	0.1225		0.0872	0.0887
284	0.0951	0.1028		0.1131	0.1123		0.0956	0.0985
285	0.0967	0.0945		0.0944	0.1125		0.0867	0.0972
286	0.0913	0.0871		0.0867	0.1036		0.0965	0.1003
287	0.0895	0.1013		0.0928	0.1027		0.0939	0.0996
288	0.0938	0.0916		0.0963	0.109		0.0813	0.0936
289	0.098	0.0861		0.0813	0.1155		0.0991	0.0976
290	0.0886	0.0956		0.0928	0.1185		0.0947	0.0945
291	0.0955	0.1014		0.0854	0.1167		0.0841	0.093
292	0.1071	0.1025		0.0922	0.1094		0.0856	0.0894
293	0.0944	0.0992		0.0791	0.1089		0.0915	0.0843
294	0.093	0.1098		0.0683	0.1023		0.0922	0.0967
295	0.0992	0.1143		0.0897	0.1186		0.0905	0.0967
296	0.0886	0.0979		0.0864	0.1164		0.0823	0.1013
297	0.0926	0.1032		0.0907	0.1021		0.0711	0.0946
298	0.0888	0.1076		0.0781	0.1071		0.0795	0.0965
299	0.0939	0.0994		0.0844	0.098		0.0711	0.088
300	0.0945	0.096		0.0871	0.1267		0.0629	0.086
