# Supplementary material for: Flower/FLWR-1 regulates neuronal activity via the plasma membrane Ca2+ ATPase to promote recycling of synaptic vesicles
Source: eLife. 2025 May 20;13:RP103870. doi: 10.7554/eLife.103870 (PMC12092002; doi:10.7554/eLife.103870)
Supplement: Figure 1—figure supplement 2—source data 1. [file elife-103870-fig1-figsupp2-data1.xlsx]

## Sheet: FigS1_2D+E
Time (s)	wild type
30	103.769	111.752	84.3389	79.7468	70.8426	118.736	99.7783	118.923	115.175	87.8049	53.8803	112.188	105.668	114.745	120.629	112.96	118.367	69.1477	104.313	96.9925	112.277	104.309	116.941	103.42	115.385														102.886	72.919	63.929	62.1514	70.5179	103.115	84.9057	84.6358	75.9156	94.8946	80.089
60	10.0897	1.00897	11.0986	6.05381	12.1076	6.05381	9.79444	14.1256	17.1525	6.05381	7.06278	10.0897	7.06278	9.08072	8.07175	8.07175	4.03587	2.01794	13.1166	14.1256	10.0897	10.0897	8.07175	43.607	4.24528	3.45268	5.75448	1.36157	1.36157	0	10.4449								7.98226	8.98004	3.99113	6.98448	1.99557	4.98891	9.97783	1.99557	10.9756	1.99557	2.99335
90	3.99113	1.21622	0	2.43243	2.99335	3.99113	20.7692	1.99557	1.99557	0.997783	4.14269	0	3.99113	1.99557	0	0	0.997783	0.997783	0.997783	3.99113	2.99335	1.99557	0	7.74527	4.98891	2.99335	0	1.99557	0	5.9867	0.997783	0							0.99889	0	0.99889	0.99889	1.99778	0.99889	0	0	0	1.99778	9.9889
120	0.99889	0	1.875	3.75	5.99334	1.99778	3.99556	23.3898	1.99778	2.99667	0	0.99889	1.473	6.99223	3.99556	0	1.99778	3.99556	2.99667	2.99667	2.99667	0	2.0362	3.99556	1.99778	0.99889	0	0	1.99778	0.99889	0.99889	3.99556	4.99445	2.16607	0	5.24272			0	0	0	1.99557	5.9867	2.99335	0.997783	2.99335	0	0	4.98891
150	46.2197	17.191	8.08989	34.382	6.65681	6.06742	14.1573	34.382	20.5529	25.2809	4.04494	18.2022	30.3371	28.3146	27.3034	23.5495	24.2697	17.4757	18.2022	29.7297	4.04494	27.3034	4.04494	26.7161	40.4494	27.3034	34.382	17.191	15.1685	6.06742	17.191	15.6716	26.8966	31.3483	18.6207	50.3251	62.8188		0	9.97783	0	4.98891	8.98004	0	0	23.9468	13.969	1.99557	0
180	106.763	71.8404	40.9091	64.3636	102.961	67.2414	93.7916	35.9202	57.0732	52.5974	71.4286	94.6667	73.8636	95.4545	43.9024	75.9425	38.6194	66.2478	67.1186	83.4347	57.9399	75.3219	99.7783	93.9641	45.1456	55.4441	81.2321	54.4423	78.5579	99.5516	63.5496								78.8248	68.847	0	32.9268	33.9623	74.1892	54.8781	27.9379	78.8248	30.9313	1.74419
210	112.875	112.369	41.9534	105.719	72.919	104.292	91.3366	97.6648	109.346	100.888	63.3997	100.599	111.38	96.2791	98.2822	68.1553	102.764	90.899	95.3177	87.3563	99.4543	96.4286	96.4286	100.189	85.3448	95.4545	104.192												106.62	59.2477	5.99334	84.669	71.9201	57.127	82.2064	35.96	88.196	72.9412	66.1922
240	107.76	31.9291	76.8293	96.1585	113.524	101.774	97.3841	85.8093	108.214	92.8968	90.3114	62.8337	104.618	99.1239	95.2116	88.8027	112.776	72.973	84.1121	73.8359	102.772	101.774	103.734	98.8439															75.1061	6.62577	97.7827	22.949	65.8537	2.99335	103.769	88.8027	79.9775	6.98448	46.8958
270	109.322	106.23	60.8647	86.8071	126.853	105.36	90.2473	99.7783	95.1104	104	103.722	74.4966	92.7938	125.143	95.9108	83.662	96.5217	84	82.4019	103.413	101.392	78.6076	123.052	78.6885															115.743	101.613	4.98891	68.847	61.8818	95.7871	48.9796	4.03135	89.0229	22.949	91.796
300	69.5518	75.9156	96.6102	108.879	33.7802	103.333	113.364	116.667	87.6316	84.9057	91.8979	101.887	79.6976	83.2192	87.6623	110	91.7098	115.895	117.511	75.4491	93.9641																		88.75	106.763	108.758	0.997783	69.8448	72.8381	72.973	90.7982	92.4324	94.7893	74.8337
330	64.8559	86.8071	78.8248	109.756	96.4286	99.7738	108.168	78.0151	101.867	101.774	76.4563	110.854	100.143	95.7871	69.2308	11.971	68.4122	103.247	99.812																				107.76	39.9113	0	109.756	110.754	98.2533	79.8226	39.7059	6.55022	115.743	132.705
360	108.135	58.0317	78.3088	98.8873	107.76	69.3115	103.769	99.2806	115.743	104.651	103.769	111.617	105.263	106.841	108.279	93.3962	80.7018	70.5508																					88.9012	94.8946	0	90.4018	100	94.4196	116.87	58.9345	101.887	97.8912	1.99778
[truncated: 167 more columns]
