# Supplementary material for: Flower/FLWR-1 regulates neuronal activity via the plasma membrane Ca2+ ATPase to promote recycling of synaptic vesicles
Source: eLife. 2025 May 20;13:RP103870. doi: 10.7554/eLife.103870 (PMC12092002; doi:10.7554/eLife.103870)
Supplement: Figure 1—figure supplement 3—source data 1. [file elife-103870-fig1-figsupp3-data1.xlsx]

## Sheet: FigS1_3A
Time (h)	wild type			flwr-1			flwr-1 + pflwr-1::FLWR-1
0	1	1	1	1	1	1	1	1	1
0.25	1	1	1	1	1	1	1	1	1
0.5	1	1	1	1	1	1	1	1	1
0.75	0.8	1	0.866667	0.8	0.933333	0.866667	0.8	0.933333	0.866667
1	0.533333	0.733333	0.6	0.4	0.666667	0.4	0.4	0.8	0.6
1.25	0.333333	0.466667	0.2	0.2	0.333333	0.2	0.133333	0.533333	0.266667
1.5	0.133333	0.133333	0.0666667	0.0666667	0.133333	0.133333	0.133333	0.266667	0.0666667
1.75	0.133333	0	0.0666667	0.0666667	0	0.0666667	0	0.0666667	0.0666667
2	0	0	0.0666667	0	0	0	0	0	0

## Sheet: FigS1_3B
Time (h)	wild type									flwr-1									flwr-1 + muscle/cholinergic::FLWR-1									flwr-1 + muscle/GABAergic::FLWR-1									flwr-1 + muscle::FLWR-1
0	1	1	1		1	1	1	1	1	1	1	1		1	1	1	1	1	1	1	1							1	1	1							1	1	1	1	1
0.5	1	1	1		1	1	1	1	1	1	1	1		1	1	1	1	1	1	1	1							1	1	1							1	1	1	1	1
1	1	1	1		1	1	1	0.933333	1	1	1	1		1	1	1	1	1	1	1	1							1	0.933333	1							1	1	1	1	1
1.5	0.8	0.933333	0.533333		0.666667	0.466667	0.6	0.533333	0.533333	1	1	1		1	1	1	0.866667	1	1	0.928571	1							0.466667	0.533333	0.733333							0.642857	1	0.933333	0.933333	0.933333
2	0.266667	0.333333	0.133333		0.266667	0.0666667	0.266667	0.2	0.2	0.866667	1	0.769231		1	0.866667	0.866667	0.666667	0.866667	0.916667	0.785714	1							0.0666667	0.133333	0.266667							0.142857	0.933333	0.4	0.533333	0.4
2.5	0.0666667	0.0666667	0		0.0666667	0	0.0666667	0.0666667	0.0666667	0.6	0.733333	0.769231		0.928571	0.666667	0.666667	0.666667	0.666667	0.75	0.714286	0.6							0	0	0.133333							0.0714286	0.533333	0.2	0.333333	0.133333
3	0	0	0		0	0	0.0666667	0.0666667	0.0666667	0.4	0.533333	0.615385		0.785714	0.466667	0.6	0.466667	0.333333	0.583333	0.571429	0.466667							0	0	0							0	0.133333	0.133333	0.333333	0.133333
3.5	0	0	0		0	0	0	0.0666667	0.0666667	0.333333	0.466667	0.384615		0.642857	0.466667	0.533333	0.266667	0.133333	0.416667	0.428571	0.333333							0	0	0							0	0.0666667	0.133333	0.133333	0
4	0	0	0		0	0	0	0.0666667	0	0.266667	0.333333	0.307692		0.428571	0.2	0.533333	0.266667	0.133333	0.25	0.357143	0.333333							0	0	0							0	0	0	0.0666667	0
4.5	0	0	0		0	0	0	0.0666667	0	0.2	0.266667	0.230769		0.285714	0.133333	0.533333	0.133333	0.0666667	0.0833333	0.214286	0.2							0	0	0							0	0	0	0.0666667	0
5	0	0	0		0	0	0	0	0	0.133333	0.2	0.153846		0.285714	0.0666667	0.266667	0.0666667	0	0.0833333	0.142857	0.133333							0	0	0							0	0	0	0	0
5.5	0	0	0		0	0	0	0	0	0.0666667	0.0666667	0.0769231		0.214286	0	0.133333	0	0	0	0.142857	0.0666667							0	0	0							0	0	0	0	0
6	0	0	0		0	0	0	0	0	0	0.0666667	0		0.0714286	0	0.133333	0	0	0	0.142857	0							0	0	0							0	0	0	0	0

## Sheet: FigS1_3C
Time (h)	wild type								flwr-1								acr-16								flwr-1; acr-16
0	1	1	1						1	1	1						1	1	1						1	1	1
0.5	1	1	1						1	1	1						1	1	1						1	1	1
1	1	1	1						1	1	1						1	1	1						0.9375	1	1
1.5	0.9286	1	1						1	1	1						1	1	1						0.9375	1	1
2	0.8571	1	1						1	1	0.9375						0.8966	1	0.9375						0.9375	1	1
2.5	0.8571	1	1						0.9231	0.9474	0.875						0.931	1	0.9375						0.9375	1	1
3	0.75	0.9	0.7778						0.8846	0.8947	0.875						0.8276	0.9231	0.8125						0.9375	1	1
3.5	0.75	0.9	0.7778						0.8846	0.9474	0.8125						0.7931	0.9231	0.6875						0.9375	0.95	0.9412
4	0.8214	0.85	0.6667						0.9231	0.8421	0.8125						0.7931	0.8462	0.8125						0.9375	1	1
4.5	0.7143	0.75	0.6667						0.8462	0.7895	0.8125						0.7931	1	0.75						0.875	1	1
5	0.5714	0.85	0.4444						0.7308	0.6316	0.6875						0.7241	0.7692	0.5						0.75	1	1
5.5	0.3929	0.6	0.5						0.6154	0.6842	0.625						0.6897	0.8462	0.6875						0.875	1	0.9412
6	0.1786	0.45	0.3333						0.5385	0.4737	0.625						0.5862	0.8462	0.6875						0.875	0.95	0.9412
6.5	0.1786	0.35	0.2222						0.4615	0.2632	0.4375						0.4828	0.7692	0.5						0.875	1	1
7	0.1429	0.2	0.1667						0.1538	0.2105	0.25						0.2414	0.6923	0.375						0.625	0.95	0.9412
7.5	0.1071	0.15	0.0556						0.1538	0.1579	0.1875						0.1379	0.3077	0.375						0.6875	0.95	0.9412

## Sheet: FigS1_3D
Time (h)	unc-47			flwr-1; unc-47
0	1	1		1	1
0.5	1	1		1	1
1	1	1		1	1
1.5	1	1		0.933333	0.933333
2	1	1		0.866667	0.866667
2.5	1	1		0.8	0.733333
3	0.928571	0.933333		0.733333	0.466667
3.5	0.928571	0.933333		0.533333	0.4
4	0.928571	0.8		0.333333	0.333333
4.5	0.714286	0.666667		0.2	0.133333
5	0.428571	0.4		0.133333	0
5.5	0.428571	0.333333		0.0666667	0
6	0.285714	0.2		0.0666667	0
6.5	0.214286	0.0666667		0.0666667	0
7	0.214286	0.0666667		0	0
7.5	0.142857	0		0	0
8	0.0714286	0		0	0
