# Supplementary material for: Flower/FLWR-1 regulates neuronal activity via the plasma membrane Ca2+ ATPase to promote recycling of synaptic vesicles
Source: eLife. 2025 May 20;13:RP103870. doi: 10.7554/eLife.103870 (PMC12092002; doi:10.7554/eLife.103870)
Supplement: Figure 1—source data 1. [file elife-103870-fig1-data1.xlsx]

## Sheet: Fig1C+D
Time (s)	wild type
30	80.8204	102.772	89.8004	82.816	100.776	94.7893	77.827	103.769	63.8581	57.8714	43.9024	99.7783	93.7916	116.741	53.7543	98.7805	109.756	98.7805	95.8134	92.9526	57.5693	65.0246	113.974		19.9556	101.774	91.796	83.8137	0	81.8182	79.8226	81.8182	99.7783	87.8049	76.8293	102.12	89.8004	138.462	82.816	87.8049	95.7871	80.8204	91.796	24.9446	75.8315	85.8093	84.8115	72.8381	100.776
60	13.9845	6.99223	5.99334	0	13.9845	12.9856	10.9878	4.99445	5.99334	4.99445	7.99112	9.9889	11.9867	10.9878	2.99667	10.9878	13.9845	6.99223	6.99223	11.9867	6.99223	7.99112	2.40964	0		2.99667	21.9756	7.99112	3.99556	7.99112	13.9845	1.99778	14.9833	11.9867	15.9822	8.99001	11.9867	6.99223	4.99445	18.9789	12.9856	18.9789	5.99334	9.9889	7.99112	16.9811	16.9811	3.99556	9.9889
90	3.99556	0	0	0	0.99889	0	1.99778	0	0	0.99889	0	0	1.99778	0	0.99889	0	0	3.99556	0	3.99556	0.99889	0	0	0	0	0	0		3.99113	0	0.997783	0.997783	0.997783	1.99557	0.997783	0	0	0	3.7037	1.99557	0	0	0	1.99557	4.98891	0.997783	3.99113	7.98226	0
120	4.99445	0	0	0	0	1.99778	0	0.99889	0	0	1.99778	0	0.99889	1.99778	0	2.99667	0	0	0	0.99889	0	2.99667	0.99889	0	0	0.99889	0		4.00891	1.0514	0	0.99889	2.99667	1.99778	0	0	0.99889	0	3.99556	0.99889	1.99778	0	0	0.99889	0.99889	0	0.99889	0	0
150	0.997783	0	0	0	0	0	0.997783	0	0	0	2.99335	0	0	2.99335	0	0	1.99557	0	0	1.99557	0	9.97783	0.997783	0	0.997783	0	9.97783		0	1.99557	0	0	0.997783	0	0	0.997783	0.997783	0	0	0	0.997783	0	0.997783	0	0	0	0.997783	0	0
180	20.9767	0	0.99889	0	0	32.9634	5.99334	5.99334	8.99001	41.9534	47.9467	1.99778	1.99778	16.5037	28.6064	14.1818	32.7273	32.9634	7.99112	28.9678	25.9711	37.9578	100.628	3.99556	29.9667	53.9401	65.3527		67.3282	0	20.6107	0	28.9357	0	3.81356	30.5085	0	0.997783	18.0424	17.9601	0	10.9756	0	1.99557	5.9867	7.98226	0	0.997783	3.4134
210	56.8736	0	0	0	0	54.8781	76.8293	0.997783	0	64.8559	110.754	41.9069	40.9091	61.8625	62.8603	24.9446	76.8293	31.0345	14.9667	52.8825	103.628	50.8869	92.3077	68.2403	87.5537				31.9291	62.8603	25.9424	85.8093	77.827	31.9291	0	38.9135	94.7893	42.9046	47.8936	71.7482	71.8404	0.997783	60.8647	30.9313	56.9212	60.8647	37.5895	27.9379	50.8869
240	0	0	93.0337	0	101.124	73.8202	81.9101	65.7303	73.7024	63.7079	65.3979	92.0225	18.2022	83.9326	82.9214	0	93.0337	46.2857	79.7143	73.8281	0	0							61.8625	69.8448	67.8492	73.8359	58.8692	0	100.776	55.9876	86.7807	77.827	79.8226	72.8381	87.8049	7.98226	75.8315	81.8182	91.796	103.769	28.9357	60.8647	84.8851
270	46.8958	93.7916	75.5158	54.8781	0	101.25	83.2653	81.0426	77.827	65.4028	61.8625	0	48.8914	67.8492	90.3044	28.3562	58.8692	88.8027	80.8204	77.827	84.2165	81	50.5435	0	65.2174				80.8204	72.8381	67.8492	73.8359	76.0845	99.2647	1.00111	48.8914	76.8293	59.867	88.8027	79.8226	48.8914	17.9601	81.8182	85.8093	109.756	31.9291	54.8781	94.7893	68.847
300	93.1034	97.8912	77.3704	68.5473	0	0	87.4834	0	47.0309	1.03448	46.9478	101.481	88.5417	99.1963	42.9523	1.99778	73.9179	0	62.8743	88.9012	90.1919								80.8081	70.7071	13.1313	98.4866	58.5859	91.1525	0	83.8384	62.6263	71.7172	71.7172	89.899	70.7071	70.7071	80.8081	57.5758	112.121	17.1717	83.8384	0	81.8182
330	97.0183	81.5367	71.2156	0	90.8257	18.0637	62.1053	61.1498	0	59.4783	0	102.972	0	0	101.425	65.4303	0	41.9825	81.4655	75									57.0136	68.2127	72.973	50.905	82.4661	1.0181	24.4344	64.1403	8.1448	80.4299	101.81	75.3394	81.448	58.0317	113.009	68.2127	0	68.2127	79.4118	83.4842	0
360	80.9101	96.8923	0	111.876	86.6575	10.1983	84.3416	65.2778	48.9456	96.8923	85.9046	4.99445	0	47.9467	0	0	66.2739	76.2258	80.0847	95.3642	17.28								76.9145	44.9501	93.8957	78.9123	61.9312	0.99889	82.9079	78.9123	60.9323	99.889	109.878	84.9057	87.9023	87.4848	19.6841	103.885	93.8957	71.9201	0	58.9345	68.9234
[truncated: 205 more columns]

## Sheet: Fig1E
Time (h)	wild type				flwr-1				flwr-1 + pflwr-1::FLWR-1
0	1	1	1	1	1	1	1	1	1	1	1	1
0.5	1	1	1	1	1	1	1	1	1	1	1	1
1	0.866667	1	1	1	1	1	1	1	0.928571	1	1	1
1.5	0.866667	0.6	0.466667	0.466667	1	0.933333	1	1	0.714286	0.571429	1	0.533333
2	0.866667	0.4	0.266667	0.0666667	0.866667	0.933333	0.642857	0.866667	0.571429	0.5	0.666667	0.2
2.5	0.733333	0.333333	0	0	0.733333	0.866667	0.428571	0.666667	0.428571	0.357143	0.4	0.0666667
3	0.466667	0.333333	0	0	0.666667	0.8	0.428571	0.466667	0.357143	0.285714	0.266667	0.0666667
3.5	0.333333	0.2	0	0	0.466667	0.8	0.357143	0.466667	0.142857	0.142857	0.2	0.0666667
4	0.133333	0.133333	0	0	0.4	0.533333	0.357143	0.2	0.142857	0.0714286	0.133333	0
4.5	0.133333	0.0666667	0	0	0.333333	0.4	0.285714	0.133333	0.142857	0	0.0666667	0
5	0	0.0666667	0	0	0.133333	0.333333	0.142857	0.0666667	0.142857	0	0	0
5.5	0	0	0	0	0	0.266667	0.142857	0	0.0714286	0	0	0
6	0	0	0	0	0	0.2	0	0	0	0	0	0
