# Supplementary material for: Flower/FLWR-1 regulates neuronal activity via the plasma membrane Ca2+ ATPase to promote recycling of synaptic vesicles
Source: eLife. 2025 May 20;13:RP103870. doi: 10.7554/eLife.103870 (PMC12092002; doi:10.7554/eLife.103870)
Supplement: Figure 2—source data 1. [file elife-103870-fig2-data1.xlsx]

## Sheet: Fig2E
distance on DNC (µm)	GFP::FLWR-1	mCherry::SNB-1
0	13.5749	30.3798
0.1647	13.8767	35.8675
0.3295	14.2101	34.6289
0.4942	12.1361	30.2635
0.6589	12.3157	28.0851
0.8237	12.7121	29.2025
0.9884	12.7203	27.7297
1.1531	13.1465	28.071
1.3179	13.303	31.7211
1.4826	14.7856	36.2735
1.6474	14.3571	37.8351
1.8121	14.1821	39.9398
1.9768	12.9826	41.3706
2.1416	12.7727	40.2752
2.3063	14.3722	42.6015
2.471	14.6024	46.6954
2.6358	15.7032	50.5011
2.8005	16.5546	53.1921
2.9652	16.9211	51.3037
3.13	16.5594	49.5887
3.2947	15.6349	52.5981
3.4594	15.2646	54.225
3.6242	16.3587	52.4893
3.7889	16.7905	45.7568
3.9536	17.0167	43.5104
4.1184	16.429	39.0423
4.2831	16.3832	32.4636
4.4479	15.6514	29.5069
4.6126	15.2108	30.0437
4.7773	13.4349	33.4112
4.9421	12.8972	37.4464
5.1068	14.2129	40.5021
5.2715	12.959	42.9437
5.4363	12.5765	39.1219
5.601	12.2094	32.821
5.7657	12.5144	32.8677
5.9305	13.6549	38.2341
6.0952	13.9593	42.1657
6.2599	13.8239	41.0651
6.4247	16.1669	42.5417
6.5894	17.01	49.5344
6.7541	15.8828	54.5911
6.9189	15.2322	53.4941
7.0836	15.7581	48.2883
7.2484	16.1047	44.6155
7.4131	15.4587	44.4277
7.5778	14.0801	41.1613
7.7426	13.3832	36.5089
7.9073	13.1593	32.7404
8.072	12.6729	30.7942
8.2368	13.7138	29.8264
8.4015	13.3351	30.2911
8.5662	13.1178	30.392
8.731	12.6884	31.2332
8.8957	13.596	34.8302
9.0604	13.7836	39.418
9.2252	13.5907	41.3444
9.3899	13.8098	40.6043
9.5546	13.9714	37.5662
9.7194	13.8675	34.1589
9.8841	14.111	32.8273
10.0489	13.9238	32.6242
10.2136	14.01	34.5029
10.3783	15.4226	40.6169
10.5431	16.5695	47.7854
10.7078	16.3585	50.5507
10.8725	16.3244	45.2385
11.0373	16.7988	35.7273
11.202	16.114	31.9529
11.3667	15.4833	33.3515
11.5315	15.8889	35.1939
11.6962	15.9789	38.9937
11.8609	16.3622	44.3066
12.0257	15.574	47.9008
12.1904	15.1885	47.5973
12.3551	16.1643	45.1468
12.5199	15.7811	42.3124
12.6846	14.4549	40.5632
12.8494	13.5261	39.8854
13.0141	13.4306	40.3898
13.1788	12.8788	39.7073
13.3436	12.0044	36.5658
13.5083	11.3204	34.5912
13.673	11.7512	36.1712
13.8378	11.9283	40.0734
14.0025	11.7277	39.0422
14.1672	12.4028	33.787
14.332	13.3693	30.9889
14.4967	13.4424	31.6384
14.6614	13.5639	31.2304
14.8262	13.7276	29.0716
14.9909	13.5442	28.2222
15.1556	13.278	26.735
15.3204	12.5493	23.3236
15.4851	11.547	20.9832
15.6499	11.556	20.8628
15.8146	11.7776	22.1111
15.9793	11.9922	22.8804
16.1441	12.4159	23.7171
16.3088	11.6286	25.2887
16.4735	12.0694	25.6406
16.6383	12.5558	24.7402
16.803	12.1961	22.5183
16.9677	11.8515	20.3798
17.1325	11.8026	19.1802
17.2972	11.8692	19.6206
17.4619	11.644	21.3417
17.6267	12.646	25.9589
17.7914	13.2715	33.1874
17.9561	14.492	38.2449
18.1209	14.9074	41.7241
18.2856	14.7467	43.6207
18.4504	14.4582	42.2419
18.6151	14.5317	38.9667
18.7798	13.7396	35.8645
18.9446	13.0073	31.1347
19.1093	12.4711	26.3633
19.274	12.3219	23.5071
19.4388	12.0353	22.9116
19.6035	12.0421	24.1109
19.7682	12.3337	28.504
19.933	12.8304	33.0309
20.0977	14.1193	37.08
20.2624	14.1326	42.1859
20.4272	15.5793	48.7227
20.5919	17.2185	52.5946
20.7566	16.1506	52.8405
20.9214	15.1159	50.631
21.0861	14.6931	48.7388
21.2509	15.4145	49.0468
21.4156	14.7053	52.2693
21.5803	15.1783	56.6309
21.7451	16.3165	61.543
21.9098	17.4222	60.8681
22.0745	18.1364	59.3198
22.2393	18.5944	59.7679
22.404	17.8853	62.2783
22.5687	17.9707	64.6171
22.7335	18.8499	66.3417
22.8982	19.0607	68.4146
23.0629	18.3998	66.1306
23.2277	16.792	56.4488
23.3924	16.9298	42.3867
23.5571	16.2274	32.0513
23.7219	13.8107	28.7805
23.8866	12.3968	29.926
24.0514	12.1402	31.7024
24.2161	12.1614	35.4519
24.3808	13.5437	41.3412
24.5456	13.6044	43.8436
24.7103	13.1894	43.4026
24.875	14.5666	45.1672
25.0398	15.5092	50.0081
25.2045	15.7504	53.9114
25.3692	17.2581	56.5509
25.534	17.5538	55.3658
25.6987	16.7806	52.5492
25.8634	16.3396	50.9331
26.0282	16.4734	50.4192
26.1929	16.1413	50.0022
26.3576	15.2438	47.0487
26.5224	14.8412	44.2003
26.6871	15.2849	44.5526
26.8519	14.8928	42.2324
27.0166	13.8437	40.6731
27.1813	13.0065	39.1787
27.3461	12.9448	39.1009
27.5108	15.0115	40.2165
27.6755	16.4597	45.4493
27.8403	16.928	48.7474
28.005	16.6852	50.5463
28.1697	16.0429	47.8554
28.3345	17.4113	45.5486
28.4992	16.4579	41.8674
28.6639	14.9839	34.4569
28.8287	14.1165	27.2186
28.9934	13.2279	23.1349
29.1581	12.0649	21.645
29.3229	11.8056	21.7547
29.4876	12.4128	21.1826
29.6524	13.1257	23.3397
29.8171	13.2782	26.7003
29.9818	14.2873	30.9995
30.1466	15.0633	39.1292
30.3113	16.8391	46.5974
30.476	17.7647	52.7911
30.6408	19.8884	57.134
30.8055	19.6698	56.6535
30.9702	18.6425	50.0041
31.135	18.5262	44.2551
31.2997	17.3441	45.0548
31.4644	17.5174	48.6653
31.6292	18.2445	52.5988
31.7939	18.4628	56.3615
31.9587	18.4279	58.6692
32.1234	19.5043	60.8293
32.2881	19.4834	62.1624
32.4529	19.8215	60.9281
32.6176	20.9242	60.7024
32.7823	22.0755	60.6613
32.9471	23.56	61.2172
33.1118	26.3423	68.83
33.2765	29.158	74.1937
33.4413	29.1517	71.1423
33.606	27.6302	63.4182
33.7707	25.8534	58.2313
33.9355	23.8203	54.5106
34.1002	22.837	48.0464
34.2649	20.1966	44.0148
34.4297	19.7734	42.1769
34.5944	18.0832	44.4771
34.7592	18.3879	47.2867
34.9239	16.8466	45.5948
35.0886	16.8577	40.5455
35.2534	16.2358	36.116
35.4181	15.8348	30.5273
35.5828	15.9628	29.7529
35.7476	16.0746	32.0874
35.9123	17.5798	35.2724
36.077	17.3888	37.1418
36.2418	18.8032	37.6371
36.4065	18.3788	34.6603
36.5712	16.609	30.3733
36.736	16.2571	29.7662
36.9007	15.8517	30.0702
37.0654	15.9678	28.056
37.2302	15.7155	25.4566
37.3949	15.1466	23.6475
37.5597	15.1177	24.7238
37.7244	16.2455	28.7586
37.8891	18.5876	30.0335
38.0539	18.3882	25.0806
38.2186	15.3564	18.7656
38.3833	12.7125	14.8641
38.5481	12.5288	14.9409
38.7128	11.7892	15.7331
38.8775	10.8709	15.5831
39.0423	10.3566	15.3884
39.207	10.5979	17.2078
39.3717	10.6587	19.2331
39.5365	10.9754	21.3454
39.7012	10.8502	26.3098
39.8659	11.9689	29.669
40.0307	12.2055	30.8146
40.1954	12.3152	33.5129
40.3601	12.8857	35.719
40.5249	13.6641	39.7411
40.6896	14.4157	41.1955
40.8544	13.6048	40.6918
41.0191	13.12	41.7957
41.1838	14.1587	36.8501
41.3486	14.8798	30.1042
41.5133	14.1349	24.1631
41.678	12.2072	22.4483
41.8428	14.072	27.3449
42.0075	14.537	30.879
42.1722	14.6717	31.7225
42.337	14.1877	30.112
42.5017	13.0416	26.9225
42.6664	12.3497	21.6367
42.8312	11.6655	18.4496
42.9959	10.357	17.9706
43.1607	9.4172	17.0976
43.3254	8.4621	18.4497
43.4901	9.108	21.0923
43.6549	8.7114	25.1836
43.8196	8.4666	27.3484
43.9843	9.0721	30.8062
44.1491	9.9903	30.4425
44.3138	10.0884	25.033
44.4785	10.4804	21.2949
44.6433	10.2801	19.6768
44.808	11.1616	20.2378
44.9727	12.3998	20.9598
45.1375	14.1433	20.7638
45.3022	13.2732	22.0761
45.4669	12.7867	22.7538
45.6317	12.0675	20.3875
45.7964	10.7261	16.3645
45.9612	9.8098	12.3492
46.1259	8.8485	10.5148

## Sheet: Fig2H
	wild type																																								unc-104
GFP::FLWR-1	0.979719	0.849826	0.897207	0.844119	0.869191	0.835161	0.774525	0.84561	0.80698	1.02207	0.972073	1.036	0.997648	0.99922	0.77229	0.987442	0.862745	0.955402	1.15327	0.911677	0.78997	0.78513	0.835717	1.15257	0.843782	0.730503	0.787214	0.876278	0.740247	0.820139	0.850743	1.03174	1.04637								0.659551	0.357402	0.52275	0.796022	0.622747	0.591294	0.628849	0.592815	0.918254
mCherry::SNB-1	0.946955	0.880953	0.646045	0.729228	0.751292	0.822115	0.682502	0.718205	0.745009	0.9623	0.910108	1.08377	1.02463	1.11135	0.814519	1.05737	0.7898	0.705192	1.02338	0.948807	0.755194	0.790205	0.823376	1.04939	0.916335	0.740506	0.848454	0.95196	0.864921	0.743688	0.72034	0.880673	1.0428								0.499103	0.212628	0.422694	0.693336	0.568366	0.463552	0.566248	0.558728	0.48996
[truncated: 20 more columns]
