# Supplementary material for: Flower/FLWR-1 regulates neuronal activity via the plasma membrane Ca2+ ATPase to promote recycling of synaptic vesicles
Source: eLife. 2025 May 20;13:RP103870. doi: 10.7554/eLife.103870 (PMC12092002; doi:10.7554/eLife.103870)
Supplement: Figure 3—figure supplement 1—source data 1. [file elife-103870-fig3-figsupp1-data1.xlsx]

## Sheet: FigS3_1A
1				2				3				4
µm	GFP::FLWR-1	TagRFP::ELKS-1		µm	GFP::FLWR-1	TagRFP::ELKS-1		µm	GFP::FLWR-1	TagRFP::ELKS-1		µm	GFP::FLWR-1	TagRFP::ELKS-1
0	19.1896	11.9683		0	30.1994	20.2779		0	49.5023	110.215		0	36.325	31.841
0.1883	19.393	10.82		0.1883	34.7915	21.7837		0.1883	49.5184	110.126		0.1883	37.9019	48.172
0.3765	17.6188	10		0.3765	37.713	26.8102		0.3765	50.3017	110.337		0.3765	38.699	76.486
0.5648	19.2398	9.2534		0.5648	36.4123	24.2225		0.5648	48.2431	102.695		0.5648	41.5538	85.61
0.7531	18.8216	4.5686		0.7531	35.0402	28.476		0.7531	43.7465	84.302		0.7531	45.7502	94.145
0.9413	15.9217	1.626		0.9413	33.1247	38.2316		0.9413	41.7006	73.906		0.9413	45.9356	105.514
1.1296	17.6132	1.297		1.1296	32.9964	34.877		1.1296	38.8793	69.285		1.1296	44.8483	110.449
1.3179	19.7781	1.6225		1.3179	34.6966	36.4041		1.3179	35.1984	61.494		1.3179	45.2693	111.554
1.5062	20.6984	3.717		1.5062	34.4512	36.3462		1.5062	33.2606	49.051		1.5062	43.6907	105.202
1.6944	21.0552	5.8592		1.6944	33.0419	32.3409		1.6944	33.1665	40.148		1.6944	41.6406	91.081
1.8827	21.5024	9.4892		1.8827	32.7625	23.039		1.8827	33.7452	32.216		1.8827	41.0231	81.602
2.071	22.2502	14.2406		2.071	31.7098	17.8932		2.071	33.3886	23.145		2.071	39.5707	70.648
2.2592	22.8705	16.9354		2.2592	31.2978	15.8095		2.2592	30.9196	23.208		2.2592	37.1984	59.176
2.4475	21.9307	11.596		2.4475	31.5479	14.7561		2.4475	29.1402	21.97		2.4475	34.5066	48.718
2.6358	20.8566	4.8806		2.6358	30.4728	19.905		2.6358	30.0722	18.066		2.6358	32.7313	32.539
2.824	20.0333	4.0891		2.824	29.2884	22.2877		2.824	30.0422	19.584		2.824	32.0108	17.549
3.0123	18.8651	5.4228		3.0123	30.704	20.4147		3.0123	30.172	23.439		3.0123	30.7243	12.547
3.2006	20.5053	6.8557		3.2006	31.5834	18.2539		3.2006	31.2529	30.173		3.2006	30.1751	11.641
3.3888	21.7835	8.5148		3.3888	32.8214	13.9942		3.3888	32.2783	35.004		3.3888	31.657	14.309
3.5771	19.8027	8.4545		3.5771	32.8864	13.5863		3.5771	33.2178	31.34		3.5771	32.0029	15.596
3.7654	19.6707	6.3816		3.7654	32.3027	16.9302		3.7654	35.3437	30.847		3.7654	31.8001	20.922
3.9536	21.9722	5.317		3.9536	32.5027	16.744		3.9536	38.6218	29.947		3.9536	33.9966	29.438
4.1419	21.6314	5.5765		4.1419	33.947	18.717		4.1419	38.1884	23.299		4.1419	34.6178	25.895
4.3302	20.7958	6.0126		4.3302	35.6792	19.5124		4.3302	37.7952	17.785		4.3302	34.4647	28.278
4.5185	22.8764	8.8931		4.5185	34.4035	15.7313		4.5185	39.4673	13.704		4.5185	34.5433	42.342
4.7067	24.9278	8.5547		4.7067	35.4648	17.7583		4.7067	39.4149	13.768		4.7067	36.6292	39.479
4.895	27.4777	8.8054		4.895	35.1329	21.0767		4.895	40.2419	14.654		4.895	36.8223	28.769
5.0833	29.1114	11.9272		5.0833	34.0259	24.6559		5.0833	40.2951	13.022		5.0833	37.0891	29.273
5.2715	28.7551	10.7194		5.2715	33.4614	28.4248		5.2715	39.6322	11.585		5.2715	36.8505	29.944
5.4598	27.1354	6.5323		5.4598	34.1976	34.0591		5.4598	38.7245	12.057		5.4598	38.3945	23.457
5.6481	27.2875	4.8531		5.6481	33.7983	36.8895		5.6481	36.5542	12.835		5.6481	39.1516	19.367
5.8363	28.5618	7.6086		5.8363	33.4732	30.946		5.8363	36.0017	13.301		5.8363	40.0416	28.676
6.0246	28.5399	7.3572		6.0246	33.7057	31.1728		6.0246	35.172	17.97		6.0246	38.1003	27.874
6.2129	28.1266	6.1844		6.2129	33.2263	28.4291		6.2129	34.8798	24.793		6.2129	36.5564	29.496
6.4011	28.3665	10.236		6.4011	32.1114	23.0236		6.4011	34.4198	22.671		6.4011	36.5741	23.74
6.5894	29.1753	15.2626		6.5894	33.3647	18.4108		6.5894	32.4439	19.774		6.5894	38.9468	29.175
6.7777	30.2884	13.5577		6.7777	33.3306	16.63		6.7777	31.1924	22.15		6.7777	39.6153	32.188
6.966	31.1792	14.923		6.966	32.5898	13.251		6.966	30.9612	20.108		6.966	39.5347	36.72
7.1542	29.3681	17.0746		7.1542	30.6864	9.3914		7.1542	31.631	17.81		7.1542	41.6195	56.371
7.3425	30.4474	15.4331		7.3425	29.1311	10.0577		7.3425	33.9748	19.675		7.3425	41.7356	74.513
7.5308	33.781	12.2448		7.5308	28.2033	9.7189		7.5308	36.0723	23.695		7.5308	44.0086	79.668
7.719	35.7055	8.4921		7.719	25.893	10.5801		7.719	38.75	27.122		7.719	43.8481	94.544
7.9073	36.698	7.3686		7.9073	25.2341	13.8908		7.9073	40.6597	23.774		7.9073	45.1929	95.625
8.0956	34.1866	6.0821		8.0956	25.1258	14.0395		8.0956	39.6923	19.098		8.0956	43.7504	96.719
8.2838	33.0915	4.9417		8.2838	24.9056	11.8787		8.2838	38.7402	15.597		8.2838	44.3015	86.019
8.4721	33.8245	5.2292		8.4721	25.4843	14.2664		8.4721	40.272	14.368		8.4721	44.8918	68.022
8.6604	32.2229	3.4393		8.6604	26.0353	22.7279		8.6604	42.8434	13.153		8.6604	41.5725	56.041
8.8486	29.4461	5.433		8.8486	28.0327	26.392		8.8486	43.2494	14.739		8.8486	40.3582	42.414
9.0369	27.3839	10.9887		9.0369	29.8024	30.5293		9.0369	43.3615	14.924		9.0369	39.6044	41.944
9.2252	27.3599	16.6357		9.2252	30.3426	30.5064		9.2252	45.0195	13.073		9.2252	39.2981	42.805
9.4134	26.0964	18.2436		9.4134	30.9663	29.8302		9.4134	45.8658	12.656		9.4134	40.6416	53.017
9.6017	25.8846	15.4816		9.6017	29.6252	29.4072		9.6017	47.4553	10.801		9.6017	41.4522	47.679
9.79	28.5018	8.1934		9.79	29.4019	28.5467		9.79	48.0702	13.373		9.79	42.9329	50.087
9.9783	27.8002	3.7006		9.9783	30.1035	22.9257		9.9783	47.0384	19.664		9.9783	41.8695	47.358
10.1665	26.1995	2.2856		10.1665	29.3561	23.5204		10.1665	48.3859	21.976		10.1665	40.0417	28.542
10.3548	24.3696	1.206		10.3548	29.4406	19.2408		10.3548	49.1328	23.512		10.3548	40.5373	18.601
10.5431	26.2757	3.0069		10.5431	28.8486	12.7797		10.5431	51.8951	26.815		10.5431	39.9206	16.668
10.7313	29.1324	6.5895		10.7313	28.4694	12.4168		10.7313	54.881	22.388		10.7313	38.3893	16.094
10.9196	30.941	10.9186		10.9196	25.6819	9.1263		10.9196	54.345	25.952		10.9196	37.7882	21.24
11.1079	30.0445	16.2086		11.1079	25.787	7.663		11.1079	51.4112	31.379		11.1079	38.026	23.336
11.2961	32.0675	17.9818		11.2961	25.4476	10.9453		11.2961	44.7654	33.327		11.2961	36.7482	27.585
11.4844	36.4155	24.2326		11.4844	23.2844	12.1266		11.4844	39.7778	35.847		11.4844	35.0896	34.158
11.6727	37.3815	35.9933		11.6727	23.8562	8.8787		11.6727	38.9426	33.932		11.6727	35.2247	25.122
11.8609	40.6823	52.0634		11.8609	23.8766	10.8707		11.8609	38.0599	43.723		11.8609	35.5487	21.718
12.0492	42.5524	54.4399		12.0492	24.1658	8.7244		12.0492	36.7117	62.59		12.0492	34.3828	23.225
12.2375	41.8634	41.9353		12.2375	24.658	7.3042		12.2375	36.6458	75.499		12.2375	34.771	19.934
12.4257	38.7699	22.4331		12.4257	24.5974	9.9238		12.4257	36.9297	84.847		12.4257	34.3437	17.777
12.614	37.5706	12.5869		12.614	24.1681	11.9394		12.614	38.2215	92.333		12.614	34.4307	19.484
12.8023	35.5764	6.8187		12.8023	23.7565	12.803		12.8023	39.264	89.589		12.8023	34.8369	21.689
12.9906	34.7953	2.8231		12.9906	23.352	11.9215		12.9906	39.8988	88.282		12.9906	33.1051	23.936
13.1788	32.151	1.5915		13.1788	23.8082	14.93		13.1788	44.811	115.245		13.1788	31.2497	38.539
13.3671	28.837	5.0565		13.3671	23.0969	15.944		13.3671	54.9171	144.778		13.3671	31.2666	53.22
13.5554	25.7084	6.6475		13.5554	22.0884	17.0448		13.5554	60.5662	160.862		13.5554	31.171	54.577
13.7436	23.6473	2.9854		13.7436	22.3586	17.563		13.7436	54.2755	140.462		13.7436	31.8616	51.895
13.9319	21.3314	3.7349		13.9319	22.7505	16.1297		13.9319	44.5596	77.939		13.9319	29.8029	47.608
14.1202	21.5532	2.1546		14.1202	23.5045	25.9578		14.1202	40.964	43.825		14.1202	29.6216	46.114
14.3084	25.4641	3.7166		14.3084	24.5895	27.5438		14.3084	41.4188	34.91		14.3084	30.4601	41.833
14.4967	30.5729	8.4377		14.4967	24.3802	29.5082		14.4967	40.1954	42.67		14.4967	30.0775	34.987
14.685	30.437	14.355		14.685	23.9914	24.1642		14.685	40.7894	49.29		14.685	30.9516	23.409
14.8732	31.5569	17.4752		14.8732	22.9179	22.5876		14.8732	42.7812	48.478		14.8732	30.1639	22.543
15.0615	30.8941	17.2189		15.0615	22.5709	15.0228		15.0615	45.546	48.002		15.0615	29.4195	28.686
15.2498	35.5572	17.2178		15.2498	22.1123	8.5493		15.2498	46.2749	36.3		15.2498	30.2049	30.884
15.4381	35.1997	19.1999		15.4381	22.3985	9.7793		15.4381	43.9927	39.643		15.4381	29.1749	25.438
15.6263	34.385	19.4415		15.6263	24.0291	11.446		15.6263	43.9644	49.033		15.6263	27.2029	22.479
15.8146	31.3763	22.2259		15.8146	25.4807	6.7337		15.8146	42.3208	46.286		15.8146	28.2461	27.768
16.0029	30.4822	19.5305		16.0029	27.4109	9.2724		16.0029	41.2893	35.509		16.0029	30.1515	41.733
16.1911	28.3071	17.083		16.1911	26.6762	10.9337		16.1911	39.6499	28.902		16.1911	30.4985	51.906
16.3794	25.0692	11.4336		16.3794	27.2751	11.0577		16.3794	40.4201	37.055		16.3794	32.1457	54.615
16.5677	22.0225	9.4921		16.5677	28.7878	17.2105		16.5677	41.9062	30.052		16.5677	32.7564	37.561
16.7559	24.2672	11.2868		16.7559	28.5384	21.4438		16.7559	42.6895	19.745		16.7559	31.3524	30.512
16.9442	24.0953	16.5438		16.9442	25.8908	26.289		16.9442	42.8809	14.713		16.9442	31.0728	32.715
17.1325	26.6233	18.884		17.1325	25.6471	35.4858		17.1325	47.7472	11.577		17.1325	32.6808	49.493
17.3207	27.9593	9.793		17.3207	26.515	35.7751		17.3207	52.5786	9.78		17.3207	35.4678	58.496
17.509	27.3336	6.7594		17.509	27.625	28.6079		17.509	55.283	13.453		17.509	35.6361	70.361
17.6973	31.3196	3.1981		17.6973	27.2356	26.6961		17.6973	57.4573	11.82		17.6973	38.0762	77.676
17.8855	31.4168	0.9683		17.8855	28.9991	22.4811		17.8855	59.4786	9.45		17.8855	37.7384	74.402
18.0738	25.8349	0.9045		18.0738	29.6462	16.3078		18.0738	61.5361	12.773		18.0738	38.4121	79.444
18.2621	28.403	2.4904		18.2621	31.3348	21.7972		18.2621	61.7246	16.521		18.2621	42.2408	82.895
18.4504	28.5907	3.484		18.4504	33.9724	29.7976		18.4504	59.1841	14.169		18.4504	47.2354	87.371
18.6386	24.7065	4.1499		18.6386	36.1768	35.4264		18.6386	55.4297	20.555		18.6386	49.3961	92.903
18.8269	24.3456	1.7812		18.8269	36.6839	40.9149		18.8269	53.0969	19.716		18.8269	49.966	93.065
19.0152	20.609	1.3162		19.0152	35.7486	43.8076		19.0152	53.4321	34.78		19.0152	49.9091	82.583
19.2034	21.6351	1.2643		19.2034	34.6324	37.1743		19.2034	56.024	51.742		19.2034	47.3371	76.379
19.3917	22.225	2.0352		19.3917	34.0296	35.2962		19.3917	56.6922	52.962		19.3917	42.0461	77.478
19.58	22.3179	1.1773		19.58	33.334	35.9394		19.58	54.4487	49.935		19.58	40.918	81.084
19.7682	23.9343	2.237		19.7682	30.8596	29.2179		19.7682	46.5962	38.707		19.7682	40.1053	78.149
19.9565	24.0296	3.3982		19.9565	28.9255	18.7767		19.9565	40.349	41.073		19.9565	38.2361	57.745
20.1448	26.9286	3.5425		20.1448	28.1317	17.0833		20.1448	36.3382	36.677		20.1448	37.3304	39.406
20.333	28.808	3.3435		20.333	26.6419	13.2042		20.333	32.3803	36.35		20.333	39.4864	27.418
20.5213	26.4874	2.0513		20.5213	26.2996	14.2268		20.5213	32.8973	32.668		20.5213	41.5564	24.933
20.7096	27.5488	3.9449		20.7096	27.2309	15.7632		20.7096	34.1594	31.852		20.7096	41.5731	21.067
20.8979	26.7258	3.2649		20.8979	28.0539	19.3253		20.8979	34.917	29.116		20.8979	41.1066	19.579
21.0861	26.0227	4.9322		21.0861	27.4233	19.6965		21.0861	35.512	36.287		21.0861	39.4745	18.924
21.2744	24.7889	8.7187		21.2744	27.2798	21.9373		21.2744	37.2149	41.993		21.2744	37.3986	14.51
21.4627	23.0578	9.0279		21.4627	28.3093	25.9549		21.4627	42.6441	52.412		21.4627	34.7407	14.724
21.6509	22.3924	9.4458		21.6509	30.1917	26.3064		21.6509	43.2382	51.228		21.6509	33.9452	15.715
21.8392	22.6871	8.0394		21.8392	30.5256	20.0523		21.8392	42.5117	42.594		21.8392	31.7701	14.86
22.0275	21.6326	7.633		22.0275	31.1282	16.4036		22.0275	44.8109	48.225		22.0275	31.6551	20.988
22.2157	23.9385	7.8425		22.2157	31.0626	12.2284		22.2157	47.6554	40.69		22.2157	31.8487	24.283
22.404	22.0884	4.7522		22.404	29.9714	10.0377		22.404	51.4018	34.913		22.404	30.7794	22.679
22.5923	23.9549	6.1262		22.5923	28.444	9.1675		22.5923	47.5335	35.606		22.5923	30.1415	17.893
22.7805	23.9951	6.9831		22.7805	26.8185	7.4799		22.7805	48.2054	37.011		22.7805	29.9352	12.026
22.9688	25.7846	8.0905		22.9688	26.0095	9.2475		22.9688	48.0646	28.982		22.9688	29.9766	12.987
23.1571	22.3388	3.9164		23.1571	23.6093	8.4239		23.1571	51.6392	33.856		23.1571	30.227	17.341
23.3453	25.1924	2.8694		23.3453	21.4841	9.5339		23.3453	55.0462	29.583		23.3453	32.7676	23.808
23.5336	26.8559	2.3926		23.5336	22.3845	11.0225		23.5336	63.3664	20.55		23.5336	35.0471	37.91
23.7219	22.2867	2.9341		23.7219	23.2838	12.3514		23.7219	73.1683	11.598		23.7219	35.5314	51.719
23.9102	22.4555	2.9822		23.9102	23.468	16.3592		23.9102	77.638	13.782		23.9102	35.3476	59.725
24.0984	21.7345	5.7798		24.0984	23.8785	18.164		24.0984	77.6689	14.278		24.0984	36.0889	53.491
24.2867	20.2155	5.0883		24.2867	24.9843	17.6724		24.2867	73.2851	12.547		24.2867	39.1675	47.412
24.475	19.9943	12.0486		24.475	24.4867	15.9524		24.475	68.5819	12.737		24.475	43.5964	43.822
24.6632	20.8145	13.8242		24.6632	23.2033	14.8784		24.6632	62.6328	17.48		24.6632	45.2779	54.539
24.8515	18.6685	16.1827		24.8515	22.0217	14.0487		24.8515	53.0227	34.187		24.8515	46.3902	72.431
25.0398	19.0604	18.47		25.0398	23.0917	13.453		25.0398	45.5188	59.995		25.0398	45.7584	80.47
25.228	19.0838	14.1239		25.228	25.0124	14.5904		25.228	47.7224	79.45		25.228	44.5851	80.855
25.4163	18.7076	14.0682		25.4163	26.0376	14.9555		25.4163	51.6531	65.991		25.4163	43.5971	82.166
25.6046	16.787	8.213		25.6046	27.3793	10.496		25.6046	52.3642	43.282		25.6046	40.9292	90.073
25.7928	17.4771	1.251		25.7928	29.7977	9.4276		25.7928	49.2542	31.8		25.7928	37.8035	99.533
25.9811	19.3932	0.5766		25.9811	31.522	8.1167		25.9811	47.4908	27.858		25.9811	36.2028	102.664
26.1694	21.3245	1.4531		26.1694	31.6037	11.3383		26.1694	43.1298	41.814		26.1694	36.3036	109.295
26.3576	21.8209	1.4296		26.3576	32.1389	14.912		26.3576	41.9435	59.901		26.3576	36.7628	111.248
26.5459	19.3074	0.651		26.5459	32.4868	17.8984		26.5459	43.5282	52.232		26.5459	35.9242	98.785
26.7342	21.4292	2.036		26.7342	33.532	25.0639		26.7342	44.5876	45.949		26.7342	33.2681	81.006
26.9225	19.4169	2.6164		26.9225	35.4623	36.6621		26.9225	46.34	33.589		26.9225	31.5155	57.389
27.1107	23.6555	2.9114		27.1107	35.1739	45.8209		27.1107	45.0096	20.42		27.1107	29.1011	36.991
27.299	28.0677	6.431		27.299	33.7222	47.671		27.299	42.6653	16.67		27.299	27.913	29.809
27.4873	22.5631	7.8354		27.4873	32.4184	43.32		27.4873	38.8412	12.599		27.4873	26.465	30.532
27.6755	24.2324	5.4485		27.6755	31.2035	39.3826		27.6755	38.2343	15.572		27.6755	24.952	36.604
27.8638	26.7927	4.1391		27.8638	30.6481	34.7028		27.8638	39.5485	14.876		27.8638	25.3118	63.626
28.0521	26.481	4.2218		28.0521	31.5841	31.0865		28.0521	40.1093	21.005		28.0521	26.7189	77.496
28.2403	23.5265	6.5538		28.2403	33.5209	32.2635		28.2403	42.974	33.292		28.2403	27.4924	67.113
28.4286	22.8049	7.333		28.4286	35.3739	37.7323		28.4286	41.7492	34.262		28.4286	27.3241	54.26
28.6169	21.5922	5.6539		28.6169	36.6711	44.1318		28.6169	39.499	25.667		28.6169	26.766	42.364
28.8051	20.3473	6.0342		28.8051	37.4157	41.3051		28.8051	37.8453	22.805		28.8051	27.3034	29.209
28.9934	18.5094	7.7632		28.9934	37.2467	28.8773		28.9934	37.0333	22.208		28.9934	27.956	28.831
29.1817	19.3208	10.4693		29.1817	35.851	22.4763		29.1817	35.4529	14.277		29.1817	28.2678	41.552
29.37	19.4896	10.8997		29.37	33.5322	21.1777		29.37	34.8397	13.86		29.37	27.1842	48.876
29.5582	17.3738	9.992		29.5582	30.5231	16.1329		29.5582	35.6699	16.146		29.5582	25.9709	45.698
29.7465	17.1149	8.2343		29.7465	27.445	11.4356		29.7465	38.6639	10.919		29.7465	25.5969	30.771
29.9348	15.7987	4.5119		29.9348	24.3656	12.2942		29.9348	38.7813	13.886		29.9348	25.3881	19.122
30.123	15.5766	4.6507		30.123	23.1425	14.6191		30.123	37.2949	16.471		30.123	26.1858	14.157
30.3113	18.0866	5.5697		30.3113	22.0109	18.7758		30.3113	37.584	19.291		30.3113	26.0726	12.649
30.4996	20.3294	5.4709		30.4996	22.2479	21.7496		30.4996	35.408	25.243		30.4996	24.5431	11.419
30.6878	19.3948	6.8976		30.6878	21.9722	12.5715		30.6878	36.8395	28.565		30.6878	24.1566	11.709
30.8761	17.6148	8.7246		30.8761	22.1125	9.5383		30.8761	37.8916	28.651		30.8761	24.1342	18.051
31.0644	20.0782	4.296		31.0644	23.4727	7.6908		31.0644	39.0441	20.47		31.0644	24.633	20.314
31.2526	20.8154	2.1163		31.2526	23.7476	6.276		31.2526	41.8705	16.906		31.2526	24.4148	23.902
31.4409	23.5068	2.9957		31.4409	24.8527	10.0526		31.4409	42.1689	17.402		31.4409	24.3567	29.935
31.6292	25.9518	3.4806		31.6292	26.8041	14.3372		31.6292	40.431	17.19		31.6292	25.3119	37.017
31.8174	26.768	5.1474		31.8174	29.0081	15.7377		31.8174	40.3634	17.807		31.8174	25.8481	44.194
32.0057	28.5581	4.6404		32.0057	31.9684	19.1793		32.0057	43.0556	10.526		32.0057	26.5016	51.034
32.194	30.2176	2.8142		32.194	36.3126	21.9605		32.194	44.282	9.433		32.194	27.4881	52.697
32.3823	33.7061	4.3944		32.3823	41.5221	18.107		32.3823	42.6511	13.979		32.3823	27.5069	48.02
32.5705	33.0585	3.7381		32.5705	44.7707	16.9673		32.5705	42.0047	14.564		32.5705	28.1017	34.434
32.7588	32.0878	4.6631		32.7588	48.0571	25.5522		32.7588	38.929	11.556		32.7588	27.5294	26.404
32.9471	30.0525	3.0747		32.9471	50.3572	37.0036		32.9471	36.6453	6.684		32.9471	27.993	25.653
33.1353	26.6866	1.1845		33.1353	50.3953	43.7748		33.1353	36.7901	9.632		33.1353	27.9917	26.966
33.3236	24.586	1.8907		33.3236	49.9652	45.392		33.3236	35.7122	11.539		33.3236	28.1443	30.34
33.5119	24.4167	2.3493		33.5119	46.9703	48.0169		33.5119	34.1913	11.973		33.5119	30.4214	29.453
33.7001	24.7249	3.0317		33.7001	43.743	46.8118		33.7001	35.3114	13.279		33.7001	33.1921	31.658
33.8884	24.9917	1.8548		33.8884	40.7559	37.1355		33.8884	36.7875	20.141		33.8884	35.0233	48.526
34.0767	23.2831	1.911		34.0767	39.0944	24.9087		34.0767	37.9372	20.418		34.0767	35.3652	63.635
34.2649	22.4323	2.4243		34.2649	38.8643	25.7966		34.2649	39.5133	25.567		34.2649	35.7255	53.039
34.4532	22.0414	3.7467		34.4532	39.2073	32.9277		34.4532	41.4389	32.244		34.4532	35.1669	37.003
34.6415	22.6163	5.4489		34.6415	39.652	38.1222		34.6415	39.4215	41.57		34.6415	33.2878	28.387
34.8298	24.4913	7.8161		34.8298	38.0556	35.9213		34.8298	42.3011	52.379		34.8298	31.5873	27.027
35.018	25.549	9.8422		35.018	36.7534	29.0508		35.018	44.0907	48.652		35.018	30.4241	35.777
35.2063	24.726	11.0276		35.2063	34.7442	25.2353		35.2063	43.2285	44.282		35.2063	29.5124	37.975
35.3946	25.7903	11.8419		35.3946	33.9089	24.501		35.3946	44.5367	51.644		35.3946	28.0855	32.089
35.5828	25.4905	14.872		35.5828	32.6058	28.6764		35.5828	44.2738	48.841		35.5828	28.2562	39.645
35.7711	22.6814	18.4633		35.7711	32.1349	35.3848		35.7711	45.1686	38.734		35.7711	29.8162	50.041
35.9594	23.3939	15.4102		35.9594	34.7542	38.6959		35.9594	44.476	40		35.9594	30.5946	55.668
36.1476	25.2269	9.9297		36.1476	35.2693	35.9176		36.1476	40.4347	37.796		36.1476	32.6838	66.161
	23.8883	5.5746		36.3359	33.9884	28.1358		36.3359	40.1005	35.077		36.3359	32.7877	66.966
	26.3635	4.683		36.5242	35.0433	25.4884		36.5242	39.7728	23.431		36.5242	31.9179	59.635
	27.5017	3.9425		36.7124	34.7975	21.3876		36.7124	39.7378	16.905		36.7124	33.7856	55.917
	24.0732	1.684		36.9007	32.3915	25.9019		36.9007	41.3276	14.083		36.9007	34.0868	48.023
	24.5195	1.2276		37.089	30.7551	24.7821		37.089	39.3743	16.54		37.089	33.3602	47.289
	22.7995	1.9242		37.2772	28.0161	17.0114		37.2772	40.0011	17.078		37.2772	32.1956	41.9
	21.6762	2.1319		37.4655	26.4834	10.5968		37.4655	40.9266	18.804		37.4655	30.1188	29.879
	19.2308	1.4247						37.6538	39.1184	22.497		37.6538	28.5967	22.704
								37.8421	38.1504	26.394		37.8421
								38.0303	42.2146	40.777		38.0303
								38.2186	44.3236	56.736		38.2186
								38.4069	46.3852	67.678		38.4069
								38.5951	47.9791	72.334		38.5951
								38.7834	50.2015	74.726		38.7834
								38.9717	49.3359	73.339		38.9717
								39.1599	45.4745	70.104		39.1599
								39.3482	32.5386	45.615		39.3482
								39.5365	30.9297	38.6032		39.5365

## Sheet: FigS3_1B
1				2				3				4				5
µm	GFP::FLWR-1	TagRFP::ELKS-1		µm	GFP::FLWR-1	TagRFP::ELKS-1		µm	GFP::FLWR-1	TagRFP::ELKS-1		µm	GFP::FLWR-1	TagRFP::ELKS-1		µm	GFP::FLWR-1	TagRFP::ELKS-1
0	15.7795	10.5249		0	11.574	4.6338		0	9.9296	3.7204		0	18.5335	10.9296		0	30.6002	22.748
0.1883	17.3821	16.9104		0.2636	12.2064	4.401		0.1883	10.2186	4.6559		0.1883	18.6569	14.0812		0.1883	44.2487	51.652
0.3765	17.7354	17.5894		0.5272	14.4989	3.4304		0.3765	11.4731	4.1717		0.3765	21.4277	17.7539		0.3765	46.5362	83.382
0.5648	16.5078	15.0977		0.7907	15.2522	3.7353		0.5648	13.2998	5.3595		0.5648	21.7315	22.8412		0.5648	46.5062	114.198
0.7531	15.9079	12.9859		1.0543	15.4968	9.6297		0.7531	16.4072	6.8668		0.7531	20.3112	21.9147		0.7531	44.2062	121.789
0.9413	15.8958	25.2567		1.3179	16.6494	14.4796		0.9413	18.4649	10.3737		0.9413	20.9127	17.5427		0.9413	40.7517	102.177
1.1296	13.5743	23.9497		1.5815	17.8934	17.4555		1.1296	19.9005	15.2824		1.1296	21.5951	18.0316		1.1296	36.6841	65.504
1.3179	11.6862	11.2369		1.845	18.1687	23.251		1.3179	22.0707	20.0937		1.3179	21.3903	22.4844		1.3179	35.2252	48.899
1.5062	11.0498	7.1982		2.1086	20.8293	17.8411		1.5062	23.6259	24.8993		1.5062	23.2112	18.2928		1.5062	31.7861	38.872
1.6944	10.0297	3.985		2.3722	22.2625	9.8305		1.6944	25.202	28.1526		1.6944	25.2815	10.9795		1.6944	27.0822	25.738
1.8827	10.3797	3.5269		2.6358	20.6877	4.8874		1.8827	25.1487	29.7201		1.8827	27.0793	16.969		1.8827	25.3985	25.71
2.071	11.0115	6.1855		2.8993	20.7034	3.0328		2.071	23.9595	33.4743		2.071	28.8623	21.4747		2.071	23.0041	19.869
2.2592	12.5674	9.8819		3.1629	18.2051	3.908		2.2592	21.7986	29.8019		2.2592	31.4228	23.6041		2.2592	22.0298	20.12
2.4475	12.0369	10.0321		3.4265	16.4309	10.1875		2.4475	19.2031	21.375		2.4475	34.1651	39.9255		2.4475	20.9012	22.878
2.6358	12.5658	9.0308		3.6901	17.0425	21.1316		2.6358	16.7444	19.294		2.6358	35.3957	60.8499		2.6358	21.3682	24.294
2.824	11.5624	15.8092		3.9536	18.8232	27.3434		2.824	14.6808	11.4299		2.824	38.3291	70.519		2.824	21.0375	17.323
3.0123	11.19	15.5895		4.2172	20.8962	24.5244		3.0123	12.5097	4.8563		3.0123	42.4347	71.9327		3.0123	21.7957	16.667
3.2006	12.5004	19.789		4.4808	18.8965	12.5791		3.2006	10.9975	5.2574		3.2006	43.0312	67.7673		3.2006	23.2791	16.667
3.3888	10.9706	14.962		4.7444	17.3747	6.4378		3.3888	10.5751	4.8664		3.3888	38.9937	56.3807		3.3888	24.5099	16.667
3.5771	11.3653	16.1489		5.008	16.9234	4.0961		3.5771	9.823	3.3559		3.5771	34.5379	39.3159		3.5771	25.9871	17.703
3.7654	11.2152	7.7457		5.2715	16.0877	3.0025		3.7654	9.5041	3.122		3.7654	30.6518	26.3494		3.7654	25.9519	23.635
3.9536	11.0906	12.3751		5.5351	13.1015	3.6578		3.9536	9.6434	4.0926		3.9536	27.0316	23.8355		3.9536	29.4823	34.837
4.1419	11.6955	7.7283		5.7987	12.7435	6.1287		4.1419	9.6776	4.0707		4.1419	22.598	21.1613		4.1419	33.5369	48.76
4.3302	11.5567	11.9112		6.0623	13.3141	10.7392		4.3302	9.9865	4.991		4.3302	18.7765	12.1966		4.3302	37.6447	85.964
4.5185	10.3768	10.6275		6.3258	14.7713	13.9744		4.5185	10.0976	7.8574		4.5185	17.601	10.7412		4.5185	41.6582	95.06
4.7067	10.3969	9.2583		6.5894	20.7181	6.5835		4.7067	9.2288	9.66		4.7067	17.2969	8.9507		4.7067	43.696	98.026
4.895	12.1885	10.0253		6.853	22.7589	6.1133		4.895	8.639	10.4597		4.895	15.4791	9.5011		4.895	43.3831	96.082
5.0833	11.5501	5.5123		7.1166	19.9824	5.5773		5.0833	9.0322	11.4495		5.0833	13.4947	7.6415		5.0833	39.2048	80.863
5.2715	10.4156	3.3145		7.3801	19.205	7.5209		5.2715	10.4741	12.0231		5.2715	13.1952	4.0622		5.2715	38.7068	41.86
5.4598	11.0055	3.016		7.6437	16.5159	4.2679		5.4598	11.3622	16.2087		5.4598	13.4028	4.7883		5.4598	34.3981	29.419
5.6481	9.8266	3		7.9073	17.6011	3.6763		5.6481	11.8947	19.1577		5.6481	12.5411	6.9637		5.6481	31.75	30.91
5.8363	9.7211	5.0987		8.1709	18.1385	5.085		5.8363	13.0592	20.1523		5.8363	11.6596	7.0488		5.8363	29.824	25.682
6.0246	9.846	4.4176		8.4344	16.6352	7.2382		6.0246	14.2123	23.7552		6.0246	12.5519	9.674		6.0246	28.5468	21.985
6.2129	9.9311	3.4235		8.698	17.6895	9.4953		6.2129	13.9311	22.9366		6.2129	13.8537	13.734		6.2129	27.8419	19.286
6.4011	11.8633	2.6694		8.9616	18.3292	13.5544		6.4011	13.1332	17.5577		6.4011	13.8003	13.0188		6.4011	27.3927	22.66
6.5894	11.6086	3.0936		9.2252	17.2376	31.5367		6.5894	11.8454	15.7589		6.5894	14.7787	10.1394		6.5894	27.8964	28.761
6.7777	10.8934	7.1512		9.4888	19.8281	23.4447		6.7777	11.4226	13.3724		6.7777	15.1155	8.6861		6.7777	28.9905	30.285
6.966	11.7057	7.1311		9.7523	19.1566	26.0203		6.966	11.7362	11.1733		6.966	14.7209	11.378		6.966	28.1578	36.01
7.1542	11.788	4.5156		10.0159	18.4217	20.7274		7.1542	11.6495	6.1035		7.1542	14.6159	10.7014		7.1542	27.5092	55.833
7.3425	12.2945	10.4505		10.2795	20.048	20.7526		7.3425	11.4372	5.8533		7.3425	14.7243	6.1697		7.3425	26.6436	79.176
7.5308	15.547	7.3119		10.5431	22.7318	22.2807		7.5308	10.9235	6.5598		7.5308	15.06	7.5807		7.5308	25.1836	60.476
7.719	18.1677	8.524		10.8066	20.0743	16.0783		7.719	11.3326	4.2486		7.719	16.1952	10.3321		7.719	25.5311	56.903
7.9073	19.8741	17.3201		11.0702	16.7776	9.6343		7.9073	11.7313	3.4488		7.9073	17.8626	12.8785		7.9073	26.0235	36.388
8.0956	25.3104	20.4382		11.3338	15.1421	6.0469		8.0956	11.8689	3.0774		8.0956	18.3756	15.4863		8.0956	26.6959	18.754
8.2838	28.4557	25.2816		11.5974	15.768	9.2504		8.2838	11.8737	3.0078		8.2838	18.3232	13.8615		8.2838	27.1346	22.538
8.4721	30.4054	45.2338		11.8609	16.1459	8.5657		8.4721	11.7711	2.8095		8.4721	19.1761	13.7475		8.4721	28.0231	22.97
8.6604	32.0061	59.7636		12.1245	17.856	16.044		8.6604	11.5081	4.448		8.6604	21.0396	18.221		8.6604	28.6563	20.625
8.8486	28.5129	47.7398		12.3881	19.4341	8.2805		8.8486	11.4712	5.1869		8.8486	22.3224	17.908		8.8486	29.0703	28.035
9.0369	24.8042	25.8868		12.6517	18.3509	10.9515		9.0369	11.9292	3.6945		9.0369	26.0712	17.2461		9.0369	27.5013	47.026
9.2252	20.1658	16.1666		12.9152	20.4312	10.8618		9.2252	12.0635	5.005		9.2252	30.8229	23.8027		9.2252	28.7181	64.534
9.4134	16.1894	14.7935		13.1788	21.2697	10.076		9.4134	12.4819	5.986		9.4134	30.3192	23.5974		9.4134	28.4002	73.352
9.6017	14.0998	7.607		13.4424	19.8372	8.5216		9.6017	13.0387	5.6057		9.6017	29.1572	23.8091		9.6017	30.5922	49.497
9.79	13.0586	3.9661		13.706	18.0952	6.6278		9.79	13.9841	6.5406		9.79	27.2896	25.783		9.79	29.1546	31.395
9.9783	12.174	3.2039		13.9696	20.4212	8.1868		9.9783	14.9799	5.3764		9.9783	27.2259	17.5005		9.9783	28.6102	22.544
10.1665	11.6941	3.8345		14.2331	23.557	8.7648		10.1665	16.4066	7.5436		10.1665	26.5222	17.1363		10.1665	29.3352	19.068
10.3548	11.2964	3.6952		14.4967	22.136	6.1422		10.3548	18.1039	6.2949		10.3548	24.0755	20.3966		10.3548	30.0598	24.702
10.5431	10.5725	4.8531		14.7603	23.7849	5.6861		10.5431	19.2439	4.3304		10.5431	22.0311	21.9434		10.5431	29.6898	29.774
10.7313	9.9968	4.9833		15.0239	23.3798	3.4826		10.7313	20.5653	6.0088		10.7313	21.2341	18.8122		10.7313	29.5368	22.122
10.9196	11.1425	3.2374		15.2874	22.729	3.2344		10.9196	21.2666	8.6925		10.9196	20.6932	12.1304		10.9196	29.4415	21.25
11.1079	11.9302	3.4335		15.551	20.0466	4.5968		11.1079	21.0801	8.7668		11.1079	21.0399	13.1515		11.1079	28.6468	19.69
11.2961	10.905	3.4904		15.8146	21.5918	4.8931		11.2961	21.8646	7.4276		11.2961	20.275	12.5284		11.2961	31.342	18.614
11.4844	10.6195	4.5345		16.0782	18.7317	4.2882		11.4844	23.039	9.7076		11.4844	19.0242	11.8461		11.4844	31.7221	16.896
11.6727	11.5344	5.3344		16.3417	17.5438	3.1586		11.6727	22.3835	14.1713		11.6727	18.1187	13.2064		11.6727	33.4292	19.226
11.8609	13.2636	8.5245		16.6053	16.4148	3.0074		11.8609	22.306	14.8034		11.8609	17.4633	8.9471		11.8609	31.8914	18.926
12.0492	13.8256	14.9034		16.8689	13.0779	3.2046		12.0492	22.3147	8.4306		12.0492	16.9633	5.5892		12.0492	31.356	26.358
12.2375	15.9946	22.7155		17.1325	12.0708	3.3965		12.2375	20.6559	10.5972		12.2375	15.8674	5.7708		12.2375	31.8637	41.269
12.4257	18.5879	27.8379		17.396	11.1804	3.0119		12.4257	19.165	10.3084		12.4257	15.3635	7.5153		12.4257	33.6906	35.167
12.614	18.5127	34.0842		17.6596	12.248	3		12.614	17.6698	8.0109		12.614	15.8311	9.7591		12.614	38.8133	27.757
12.8023	19.0552	35.5869		17.9232	13.9832	3.6874		12.8023	16.5034	9.3699		12.8023	15.5803	6.5157		12.8023	45.4875	52.994
12.9906	20.7263	27.4278		18.1868	16.9101	3.5118		12.9906	16.6677	11.9279		12.9906	15.6532	3.0904		12.9906	43.4775	63.86
13.1788	20.7787	26.0549		18.4504	20.8941	3.5931		13.1788	16.4443	12.5519		13.1788	16.3133	2.9432		13.1788	43.1214	71.066
13.3671	19.3998	34.7128		18.7139	25.0476	4.4685		13.3671	15.1718	6.2076		13.3671	15.6197	3		13.3671	41.0482	60.867
13.5554	17.8046	43.4511		18.9775	28.3025	5.6113		13.5554	14.5063	7.8917		13.5554	15.8471	4.7604		13.5554	39.0047	31.41
13.7436	17.7149	29.9944		19.2411	28.8528	8.412		13.7436	14.7415	6.8564		13.7436	15.9766	6.9337		13.7436	38.9708	30.457
13.9319	16.8768	15.1896		19.5047	25.9028	10.3508		13.9319	14.5932	8.7499		13.9319	15.4721	8.423		13.9319	34.1568	26.861
14.1202	16.5203	11.4226		19.7682	22.8904	17.2511		14.1202	14.4676	7.7028		14.1202	15.0694	8.5707		14.1202	31.4989	18.189
14.3084	17.1933	9.8586		20.0318	18.3867	24.5954		14.3084	14.8865	12.36		14.3084	15.6341	5.2502		14.3084	29.4528	16.715
14.4967	16.9073	5.7458		20.2954	17.0945	26.8241		14.4967	15.0081	11.7115		14.4967	16.1131	3.8394		14.4967	28.9665	16.871
14.685	16.3129	5.7005		20.559	16.9727	20.6499		14.685	14.7716	13.0482		14.685	16.7639	8.3329		14.685	29.8595	17.9
14.8732	16.251	4.6086		20.8225	20.072	20.7171		14.8732	15.8181	8.7081		14.8732	18.8948	9.7375		14.8732	32.6051	18.841
15.0615	15.2208	4.4201		21.0861	21.9442	20.4296		15.0615	16.4031	8.9179		15.0615	19.7356	9.426		15.0615	30.7958	20.804
15.2498	14.9539	3.2038		21.3497	19.5789	17.231		15.2498	17.1253	9.4378		15.2498	20.5162	11.0912		15.2498	30.673	24.635
15.4381	14.8057	3.0412		21.6133	19.1989	19.854		15.4381	17.1071	14.3162		15.4381	22.1467	13.0818		15.4381	28.774	18.628
15.6263	14.5279	2.7754		21.8768	18.9404	26.2616		15.6263	17.9018	18.6377		15.6263	22.9909	15.8456		15.6263	27.2159	17.714
15.8146	13.7404	2.8961		22.1404	18.4475	27.5811		15.8146	21.3692	18.3099		15.8146	24.8042	26.1387		15.8146	25.9284	26.63
16.0029	14.072	6.5605		22.404	17.9522	25.4607		16.0029	20.668	16.3777		16.0029	26.2483	29.842		16.0029	24.5162	21.782
16.1911	14.6543	11.0592		22.6676	18.8771	15.4634		16.1911	20.05	19.147		16.1911	24.2564	34.1976		16.1911	23.549	17.215
16.3794	14.4217	10.2221		22.9312	17.6771	9.7544		16.3794	20.5273	26.523		16.3794	24.1651	29.1936		16.3794	23.4352	18.138
16.5677	13.6971	6.9409		23.1947	16.5347	7.0845		16.5677	19.7254	27.5865		16.5677	25.9743	35.103		16.5677	23.1983	17.563
16.7559	14.661	10.6054		23.4583	15.813	5.9049		16.7559	19.8448	22.8969		16.7559	22.0697	37.0209		16.7559	24.1257	18.744
16.9442	17.5175	12.5039		23.7219	14.7003	9.4309		16.9442	18.5498	23.6119		16.9442	17.1473	22.8749		16.9442	25.2549	17.897
17.1325	18.7048	7.3551		23.9855	14.9586	14.1642		17.1325	17.8862	21.9022		17.1325	17.4837	10.8973		17.1325	27.1504	17.775
17.3207	20.1007	8.9857		24.249	15.3089	13.1441		17.3207	15.9445	16.8556		17.3207	17.2647	7.4893		17.3207	30.6243	34.598
17.509	21.7108	10.0777		24.5126	15.6033	6.4307		17.509	17.1412	11.3645		17.509	14.9699	8.4434		17.509	31.0306	52.355
17.6973	21.8388	11.9452		24.7762	14.7797	5.14		17.6973	17.1921	11.3011		17.6973	14.1215	10.8564		17.6973	29.3471	51.092
17.8855	20.7493	16.1863		25.0398	15.0061	4.8223		17.8855	16.6221	7.416		17.8855	13.8419	9.7862		17.8855	26.2351	59.33
18.0738	23.1969	10.1671		25.3033	17.2877	3.611		18.0738	17.1909	9.9427		18.0738	14.3541	6.0561		18.0738	25.82	47.483
18.2621	24.1558	7.2378		25.5669	15.349	3.3619		18.2621	18.0665	10.8983		18.2621	14.2789	4.5199		18.2621	26.4871	40.238
18.4504	23.5082	11.4729		25.8305	18.9857	3.2226		18.4504	19.5665	14.6193		18.4504	12.8603	4.5083		18.4504	28.1061	20.122
18.6386	26.1526	9.1577		26.0941	18.5278	5.1134		18.6386	20.263	14.264		18.6386	13.6079	4.6307		18.6386	29.4454	30.142
18.8269	26.0451	8.1653		26.3576	15.7972	9.1945		18.8269	21.9653	9.7191		18.8269	15.4557	4.7607		18.8269	30.0561	28.076
19.0152	24.9176	6.272		26.6212	14.7708	8.6768		19.0152	22.0015	9.0122		19.0152	15.0683	6.1235		19.0152	31.3423	36.564
19.2034	21.8757	8.9171		26.8848	16.4765	3.8862		19.2034	23.274	11.6786		19.2034	14.9163	6.3879		19.2034	34.3696	33.301
19.3917	20.352	8.5332		27.1484	16.5795	3.733		19.3917	22.287	10.5707		19.3917	14.7127	4.9286		19.3917	35.1236	47.304
19.58	18.6182	8.9286		27.412	15.0171	3.0647		19.58	21.6965	13.3402		19.58	14.3099	4.2491		19.58	36.3025	43.158
19.7682	15.479	8.8452		27.6755	15.5259	3		19.7682	22.7165	16.894		19.7682	15.1594	3.5151		19.7682	36.3474	42.011
19.9565	14.6502	4.9492		27.9391	17.1561	3.064		19.9565	22.5647	16.8544		19.9565	17.4462	8.6158		19.9565	37.4341	42.04
20.1448	12.3041	6.2329		28.2027	16.644	4.0774		20.1448	22.9133	21.2009		20.1448	17.4821	10.2749		20.1448	39.1586	33.312
20.333	11.8057	11.1029		28.4663	15.412	7.0056		20.333	23.1951	20.5785		20.333	19.2074	8.331		20.333	39.5411	68.994
20.5213	12.2251	11.1385		28.7298	16.2323	6.6798		20.5213	26.5195	13.392		20.5213	21.5172	13.6441		20.5213	35.0729	72.487
20.7096	12.2667	14.2894		28.9934	16.3753	5.5034		20.7096	23.1313	19.5207		20.7096	20.7289	17.6145		20.7096	31.3636	71.142
20.8979	13.5145	12.2585		29.257	14.9307	16.9889		20.8979	22.446	21.8338		20.8979	21.2615	15.0212		20.8979	28.5754	50.122
21.0861	12.7125	8.5851		29.5206	16.2424	15.0349		21.0861	20.9664	17.6004		21.0861	22.3896	14.6255		21.0861	28.6546	47.11
21.2744	12.3576	9.6998		29.7841	16.3931	12.2194		21.2744	20.4408	18.3081		21.2744	22.2019	11.5502		21.2744	29.0306	34.933
21.4627	11.3175	8.8325		30.0477	16.8469	19.061		21.4627	19.8209	24.4582		21.4627	21.6804	14.1405		21.4627	34.7421	28.517
21.6509	12.1977	9.0372		30.3113	16.6567	15.9826		21.6509	18.1121	30.4029		21.6509	22.4931	13.3406		21.6509	35.5104	39.489
21.8392	10.8253	7.745		30.5749	19.7864	6.4349		21.8392	18.2481	26.7684		21.8392	22.4089	9.9736		21.8392	33.9388	35.665
22.0275	11.4801	8.6754		30.8384	20.2009	4.2202		22.0275	17.6232	29.0596		22.0275	20.1954	8.2154		22.0275	37.2018	37.347
22.2157	12.1377	9.2458		31.102	21.7676	3.0173		22.2157	17.362	19.459		22.2157	18.4208	8.5261		22.2157	39.1241	64.847
22.404	14.0475	6.5299		31.3656	21.5664	3.4653		22.404	17.7431	28.9255		22.404	16.7159	8.9247		22.404	37.7666	59.114
22.5923	15.763	8.7611		31.6292	25.2623	4.3324		22.5923	17.6382	25.4976		22.5923	15.9693	8.0428		22.5923	37.8337	53.517
22.7805	17.5393	17.482		31.8928	23.5904	3.7466		22.7805	19.1209	27.1868		22.7805	16.4445	6.3144		22.7805	37.6884	46.147
22.9688	22.2293	32.1403		32.1563	20.4462	4.4258		22.9688	22.0404	34.0391		22.9688	16.5043	7.2807		22.9688	35.485	46.976
23.1571	23.0319	33.7305		32.4199	20.4055	5.9267		23.1571	22.3848	38.4534		23.1571	17.6541	12.1444		23.1571	39.4895	59.451
23.3453	23.1327	34.6719		32.6835	18.8293	4.7727		23.3453	21.7854	40.5323		23.3453	18.251	11.5932		23.3453	36.0701	40.239
23.5336	22.3441	40.2826		32.9471	19.426	6.8614		23.5336	20.9493	33.1603		23.5336	18.882	13.1622		23.5336	37.0232	35.443
23.7219	23.3516	37.9006		33.2106	20.4059	7.8436		23.7219	17.2775	15.7274		23.7219	21.4593	13.1381		23.7219	37.5555	22.644
23.9102	19.3647	33.3836		33.4742	18.759	10.5958		23.9102	14.3611	11.8243		23.9102	22.5508	17.7396		23.9102	36.4178	19.223
24.0984	16.3197	23.3929		33.7378	18.2444	12.391		24.0984	13.9724	8.3399		24.0984	23.242	18.4007		24.0984	34.9265	22.956
24.2867	15.6013	7.5199		34.0014	17.7109	6.6067		24.2867	15.8968	4.5625		24.2867	25.1696	21.6132		24.2867	36.397	47.324
24.475	15.802	4.1521		34.2649	18.0273	3.3226		24.475	15.9079	4.8092		24.475	29.4479	21.5341		24.475	38.2867	44.969
24.6632	14.814	5.2567		34.5285	17.1989	3.2536		24.6632	15.2798	7.7271		24.6632	31.237	19.2634		24.6632	35.3707	30.394
24.8515	14.8344	5.7749		34.7921	16.7484	3.2763		24.8515	15.6859	7.6001		24.8515	29.4996	17.2809		24.8515	33.2401	31.747
25.0398	15.751	8.1962		35.0557	19.5014	3.4194		25.0398	14.6074	6.5485		25.0398	25.925	15.689		25.0398	33.5483	31.836
25.228	18.1471	13.7141		35.3193	21.5453	3.298		25.228	15.1155	9.2263		25.228	24.1714	11.7093		25.228	35.3773	31.376
25.4163	19.9542	14.3025		35.5828	20.049	4.1958		25.4163	15.6944	13.953		25.4163	24.9094	9.9685		25.4163	35.332	38.801
25.6046	25.0493	21.4561		35.8464	18.3074	4.1048		25.6046	15.7168	17.8866		25.6046	22.9922	6.5192		25.6046	37.5065	35.232
25.7928	26.4447	20.3762		36.11	18.3804	4.7212		25.7928	17.6403	30.6437		25.7928	20.644	4.9801		25.7928	38.0247	56.374
25.9811	27.6977	17.4394		36.3736	17.5039	8.5028		25.9811	19.6857	32.7329		25.9811	19.3228	4.4397		25.9811	38.1362	60.146
26.1694	28.1523	18.045		36.6371	17.4282	6.5341		26.1694	18.6313	44		26.1694	20.4095	5.1668		26.1694	35.373	55.946
26.3576	27.7206	17.2629		36.9007	17.5095	3.7924		26.3576	16.4431	41.2563		26.3576	21.9468	6.05		26.3576	35.3622	30.539
26.5459	27.0187	13.6965		37.1643	17.83	4.6446		26.5459	15.4189	20.3648		26.5459	21.8534	9.4872		26.5459	34.5317	29.488
26.7342	25.0501	8.0611		37.4279	21.3937	4.9425		26.7342	13.5538	12.0348		26.7342	23.6196	14.183		26.7342	36.8688	21.578
26.9225	24.9996	15.753		37.6914	20.5906	6.222		26.9225	14.7722	12.4054		26.9225	25.2829	30.2448		26.9225	40.9916	23.865
27.1107	25.9666	27.9914		37.955	20.4825	14.305		27.1107	17.7346	15.3027		27.1107	24.1547	33.7837		27.1107	41.4474	20.128
27.299	30.306	31.1079		38.2186	20.8307	14.324		27.299	19.7567	18.3508		27.299	24.5912	17.4019		27.299	44.2157	22.92
27.4873	29.2502	34.4255		38.4822	20.9341	10.3193		27.4873	22.0326	15.7126		27.4873	27.0431	14.8779		27.4873	43.3	33.199
27.6755	26.3161	25.3112		38.7457	20.7618	5.2299		27.6755	22.521	18.1218		27.6755	27.7064	15.3678		27.6755	44.7003	50.424
27.8638	25.7942	20.234		39.0093	22.0785	3.5296		27.8638	28.3985	20.0492		27.8638	27.7767	11.1462		27.8638	46.3543	54.584
28.0521	23.7551	13.8326		39.2729	22.8945	3.3893		28.0521	30.8475	22.7501		28.0521	27.7034	12.9991		28.0521	46.2081	55.738
28.2403	21.0693	14.2067		39.5365	21.5601	5.2627		28.2403	34.4355	22.5562		28.2403	28.0052	19.9387		28.2403	42.6386	48.134
28.4286	20.1204	20.1303		39.8001	18.9624	6.5664		28.4286	36.0923	28.3659		28.4286	29.5725	18.191		28.4286	42.3026	32.129
28.6169	20.0587	23.2468		40.0636	17.7558	5.8217		28.6169	37.8708	32.577		28.6169	29.0271	16.2131		28.6169	41.3342	27.619
28.8051	20.0156	27.1747		40.3272	17.58	10.2967		28.8051	36.2578	29.2426		28.8051	24.9918	24.924		28.8051	39.9623	27.11
28.9934	19.4568	25.3277		40.5908	18.5665	12.9663		28.9934	37.3851	30.5756		28.9934	20.9815	18.0882		28.9934	41.0781	44.029
29.1817	19.748	20.1101		40.8544	19.3781	13.2789		29.1817	37.4974	29.6587		29.1817	17.4714	6.6984		29.1817	38.8351	57.654
29.37	19.4768	16.0788		41.1179	21.68	20.2679		29.37	37.3417	30.8543		29.37	15.4081	6.1742		29.37	38.4917	38.108
29.5582	19.6197	20.0976		41.3815	23.7265	26.8337		29.5582	38.9267	19.9294		29.5582	15.1192	8.0624		29.5582	37.8675	18.364
29.7465	18.7889	36.1056		41.6451	25.5821	26.7982		29.7465	36.8332	21.9287		29.7465	15.4377	9.5123		29.7465	37.7305	21.902
29.9348	20.5623	42.2502		41.9087	25.1354	24.6164		29.9348	35.4014	17.3544		29.9348	14.768	8.9188		29.9348	37.5123	24.225
30.123	23.805	37.5758		42.1722	23.1073	17.1773		30.123	31.3365	19.572		30.123	13.7282	10.4825		30.123	35.3191	22.293
30.3113	23.1549	38.5156		42.4358	23.6974	12.7229		30.3113	27.0036	17.8025		30.3113	12.9252	12.7658		30.3113	33.3254	34.258
30.4996	19.0117	27.9332		42.6994	22.2867	9.4894		30.4996	23.9095	17.6769		30.4996	14.0613	8.7477		30.4996	36.2093	32.223
30.6878	15.4579	13.5639		42.963	21.924	9.5941		30.6878	21.8642	14.5808		30.6878	14.3267	3.8914		30.6878	34.8434	21.651
30.8761	14.1175	10.402		43.2265	24.135	11.3266		30.8761	20.3403	17.0978		30.8761	14.0951	3.347		30.8761	33.5508	17.699
31.0644	12.709	9.6721		43.4901	22.444	9.9788		31.0644	18.3694	24.7187		31.0644	14.6627	5.3874		31.0644	35.4388	19.982
31.2526	11.8212	10.5681		43.7537	20.0885	8.3244		31.2526	17.3365	18.89		31.2526	14.8648	4.2503		31.2526	36.8867	17.111
31.4409	12.7079	7.8277		44.0173	17.9448	5.4815		31.4409	16.3026	11.6784		31.4409	15.2183	2.7504		31.4409	34.5376	22.678
31.6292	10.8383	4.8881		44.2808	19.179	9.2099		31.6292	15.9046	8.6429		31.6292	16.2908	3.696		31.6292	32.0581	23.471
31.8174	9.7982	8.8157		44.5444	22.87	6.3453		31.8174	14.436	7.7658		31.8174	16.0294	4.4972		31.8174	32.1676	18.705
32.0057	9.391	9.1676		44.808	23.8624	8.2089		32.0057	15.1331	5.5116		32.0057	15.4234	3.5704		32.0057	32.0509	17.677
32.194	8.9088	9.172		45.0716	24.1468	4.024		32.194	14.5196	6.4194		32.194	15.7647	4.8796		32.194	32.497	19.229
32.3823	8.1082	8.2209		45.3352	21.7225	3.7351		32.3823	14.9439	5.4606		32.3823	15.6038	5.0518		32.3823	32.1011	23.699
32.5705	9.1741	10.2653		45.5987	21.1034	4.844		32.5705	15.928	6.4627		32.5705	14.7359	4.4875		32.5705	33.3958	29.173
32.7588	9.5703	18.9613		45.8623	18.5209	5.9137		32.7588	14.8113	6.142		32.7588	15.4768	4.3781		32.7588	37.9046	33.976
32.9471	11.1904	24.0747		46.1259	18.2106	7.9348		32.9471	15.0923	4.9553		32.9471	17.3005	4.2955		32.9471	38.6943	28.13
33.1353	10.4515	23.9943		46.3895	16.5948	12.0735		33.1353	15.8447	6.4659		33.1353	16.796	5.5955		33.1353	43.2997	19.446
33.3236	8.6452	18.2226		46.653	17.3916	8.7849		33.3236	14.8575	7.1563		33.3236	14.943	4.3723		33.3236	45.1661	29.067
33.5119	8.3621	9.4414		46.9166	17.8295	11.4499		33.5119	15.5935	6.0136		33.5119	14.2913	5.7707		33.5119	45.2833	48.633
33.7001	8.7565	8.0706		47.1802	17.5862	9.6644		33.7001	18.9304	9.5413		33.7001	15.0594	5.7259		33.7001	45.4829	53.935
33.8884	8.485	8.1281		47.4438	18.8898	11.7909		33.8884	23.3164	17.2716		33.8884	14.9392	6.9543		33.8884	45.2278	39.059
34.0767	7.2266	8.9173		47.7073	18.83	7.8691		34.0767	27.8162	23.2008		34.0767	15.7211	7.4945		34.0767	40.9722	25.012
34.2649	7.7344	6.5767		47.9709	19.1119	5.2386		34.2649	33.0824	37.6844		34.2649	16.4737	5.4612		34.2649	36.8541	17.108
34.4532	9.5626	5.6403		48.2345	18.4794	4.0426		34.4532	38.7404	59.159		34.4532	16.0965	3.9497		34.4532	39.9462	20.879
34.6415	11.6286	7.0969		48.4981	20.0945	3.8901		34.6415	38.337	62.4874		34.6415	16.2441	8.7791		34.6415	36.3582	28.687
34.8298	12.8998	12.6637		48.7617	22.7081	7.1671		34.8298	33.6461	53.0861		34.8298	16.9394	8.7333		34.8298	38.1188	40.95
35.018	16.5096	18.7411		49.0252	22.1906	4.4965		35.018	28.7556	29.5947		35.018	20.7293	6.9278		35.018	45.4439	62.184
35.2063	19.6185	21.019		49.2888	16.8876	5.2864		35.2063	26.9873	24.0545		35.2063	24.8789	12.2595		35.2063	45.4408	75.933
35.3946	22.0877	16.8715						35.3946	26.5282	21.1333		35.3946	29.788	19.8805		35.3946	46.86	95.51
35.5828	28.8309	16.2929						35.5828	24.7151	12.1075		35.5828	34.5977	23.1042		35.5828	52.8963	78.982
35.7711	32.8104	20.9117						35.7711	24.6927	13.1734		35.7711	35.9803	26.5109
35.9594	32.7362	23.9965						35.9594	22.474	11.75		35.9594	35.6953	29.1497
36.1476	32.7804	25.867						36.1476	19.6062	8.5788		36.1476	35.2665	33.8953
36.3359	33.3064	33.6339						36.3359	17.3392	9.5715		36.3359	33.8044	23.8738
36.5242	34.7838	32.8837						36.5242	17.2886	10.1767		36.5242	31.8845	17.0769
36.7124	35.7445	30.4654						36.7124	16.8061	12.2381		36.7124	27.6342	14.1928
36.9007	37.038	34.1108						36.9007	14.5468	12.5911		36.9007	23.1318	11.1751
37.089	31.988	20.1625						37.089	14.9571	14.6756		37.089	22.6532	9.8283
37.2772	31.7688	25.7609						37.2772	15.6855	16.0667		37.2772	21.7779	9.8694
37.4655	28.448	27.2332						37.4655	14.5852	17.8375		37.4655	20.9192	12.7061
37.6538	24.2622	24.1071						37.6538	13.2174	10.2794		37.6538	22.2055	12.1635
37.8421	21.1128	15.4007						37.8421	13.685	10.923		37.8421	24.0566	23.7543
38.0303	18.2881	14.8097						38.0303	14.0315	10.2339		38.0303	28.2596	33.1639
38.2186	17.0145	17.2085						38.2186	14.6009	10.7197		38.2186	30.3608	27.9717
38.4069	17.0478	17.1108						38.4069	14.5349	10.5202		38.4069	32.7001	24.782
38.5951	16.08	14.7161						38.5951	15.946	9.0341		38.5951	33.8987	29.5425
38.7834	14.6	10.7655						38.7834	16.7423	8.1804		38.7834	35.8192	24.685
38.9717	14.3647	5.6355						38.9717	17.411	9.5077		38.9717	37.0722	22.988
39.1599	13.4045	4.9206						39.1599	19.084	10.0571		39.1599	33.3453	16.7452
39.3482	12.9207	7.3167						39.3482	21.267	12.0562		39.3482	29.5615	11.2841
39.5365	14.4472	11.2344						39.5365	24.0944	18.6099		39.5365	25.1456	8.6237
39.7247	14.6063	9.4398						39.7247	26.0566	28.2349		39.7247	21.9872	7.0929
39.913	14.8295	7.2107						39.913	29.0185	43.9927		39.913	19.8134	8.2569
40.1013	14.5258	4.8532						40.1013	29.8946	46.3764		40.1013	16.6113	8.5754
40.2896	13.9738	4.9403						40.2896	29.0655	35.7783		40.2896	15.3768	8.0409
40.4778	13.2243	6.305						40.4778	27.0184	26.0102		40.4778	14.0889	7.9897
40.6661	14.3016	13.148						40.6661	24.8527	15.0725		40.6661	13.6549	6.7963
40.8544	14.7013	13.3018						40.8544	22.9004	9.2439		40.8544	13.8434	6.2774
41.0426	16.988	10.6779										41.0426	13.779	5.8035
41.2309	21.839	17.15										41.2309	13.513	7.7106
41.4192	26.7748	36.7863										41.4192	14.2992	6.6612
41.6074	31.7784	54.2038										41.6074	16.0809	9.1127
41.7957	35.4063	77.3509										41.7957	15.2223	10.7028
41.984	39.1802	69.5987										41.984	15.6823	7.2591
42.1722	36.3031	42.9802										42.1722	13.5522	5.8027
42.3605	33.2973	20.2144										42.3605	11.2845	5.7084
42.5488	31.954	14.4312										42.5488	12.2766	9.7623
42.737	32.4258	14.5888										42.737	12.7529	9.6029
42.9253	29.8082	16.3904										42.9253	13.7619	5.7492
43.1136	26.004	14.4855										43.1136	13.1444	6.9561
43.3019	22.6607	12.1165										43.3019	12.2698	8.0968
43.4901	20.2931	8.8752										43.4901	12.0209	10.3907
43.6784	19.484	7.095										43.6784	11.5299	10.7753
43.8667	18.819	8.9536										43.8667	11.2393	6.8606
44.0549	17.3183	19.033										44.0549	13.1777	5.0746
44.2432	15.6471	14.4757										44.2432	15.7804	4.7693
44.4315	15.652	19.0751										44.4315	17.5915	9.8962
44.6197	16.5481	15.5512										44.6197	19.0601	13.743
44.808	14.8959	8.4262										44.808	22.5579	22.0009
44.9963	14.7522	6.7191										44.9963	28.2699	35.9943
45.1845	17.3061	6.5566										45.1845	34.7342	44.0555
45.3728	18.0162	6.1749										45.3728	37.2914	42.254
45.5611	19.9487	9.2445										45.5611	33.1728	33.6672
45.7493	18.1054	11.0285										45.7493	27.3653	18.7148
45.9376	18.5774	13.0075										45.9376	24.3341	10.8897
46.1259	19.4544	14.4699										46.1259	20.7842	8.2371
46.3142	21.7455	13.7221										46.3142	17.8529	6.6026
46.5024	23.5931	12.9152										46.5024	17.055	4.5203
46.6907	25.8414	14.6159										46.6907	15.8386	3.8366
46.879	27.5499	24.8696
47.0672	30.3716	45.7483
47.2555	32.0113	55.4413
47.4438	31.4585	35.3398
47.632	28.6428	27.6238

## Sheet: FigS3_1C
cholinergic	GABAergic
0.226	0.4527
0.415	0.01686
0.01537	0.4358
0.3008	0.648
	0.2478
