# Supplementary material for: Flower/FLWR-1 regulates neuronal activity via the plasma membrane Ca2+ ATPase to promote recycling of synaptic vesicles
Source: eLife. 2025 May 20;13:RP103870. doi: 10.7554/eLife.103870 (PMC12092002; doi:10.7554/eLife.103870)
Supplement: Figure 3—source data 1. [file elife-103870-fig3-data1.xlsx]

## Sheet: Fig3D
Time (h)	wild type								flwr-1								flwr-1 + GABAergic::FLWR-1								flwr-1 + cholinergic::FLWR-1
0	1	1	1	1	1	1	1	1	1	1	1	1	1	1	1	1	1	1	1	1	1				1	1	1
0.5	1	1	1	1	1	1	1	1	1	1	1	1	1	1	1	1	1	1	1	1	1				1	1	1
1	0.866667	1	1	0.894737	0.9	1	0.95	1	1	1	1	0.95	1	1	0.95	1	0.95	0.9	1	1	1				1	1	1
1.5	0.866667	0.6	0.466667	0.736842	0.75	1	0.85	0.533333	1	0.933333	1	0.9	0.85	0.95	0.9	1	0.75	0.8	0.894737	0.9	0.714286				0.933333	0.933333	0.933333
2	0.866667	0.4	0.266667	0.263158	0.45	0.9	0.65	0.0666667	0.866667	0.933333	0.642857	0.85	0.65	0.9	0.75	1	0.3	0.6	0.789474	0.45	0.428571				0.933333	0.866667	0.866667
2.5	0.733333	0.333333	0	0	0.25	0.75	0.4	0	0.733333	0.866667	0.428571	0.65	0.65	0.7	0.65	0.928571	0.2	0.45	0.578947	0.2	0.214286				0.866667	0.866667	0.6
3	0.466667	0.333333	0	0	0.15	0.55	0.3	0	0.666667	0.8	0.428571	0.4	0.6	0.65	0.45	0.785714	0.1	0.05	0.315789	0.1	0.0714286				0.6	0.8	0.466667
3.5	0.333333	0.2	0	0	0.05	0.55	0.15	0	0.466667	0.8	0.357143	0.2	0.4	0.5	0.25	0.642857	0.05	0	0.210526	0.05	0.0714286				0.533333	0.8	0.4
4	0.133333	0.133333	0	0	0	0.25	0.15	0	0.4	0.533333	0.357143	0.15	0.25	0.45	0.2	0.428571	0	0	0.157895	0.05	0				0.333333	0.733333	0.4
4.5	0.133333	0.0666667	0	0	0	0.15	0.1	0	0.333333	0.4	0.285714	0.15	0.15	0.3	0.1	0.285714	0	0	0.157895	0	0				0.133333	0.666667	0.266667
5	0	0.0666667	0	0	0	0.1	0.05	0	0.133333	0.333333	0.142857	0.1	0.1	0.3	0.05	0.285714	0	0	0.157895	0	0				0.133333	0.333333	0.2
5.5	0	0	0	0	0	0.1	0.05	0	0	0.266667	0.142857	0.05	0.1	0.25	0.05	0.214286	0	0	0.0526316	0	0				0.133333	0.333333	0
6	0	0	0	0	0	0	0.05	0	0	0.2	0	0.05	0.05	0.15	0.05	0.0714286	0	0	0	0	0				0.133333	0.333333	0

## Sheet: Fig3E
Time (h)	wild type			flwr-1			unc-47			flwr-1; unc-47
0	1	1	1	1	1	1	1	1	1	1	1	1
0.5	1	1	1	1	1	1	1	1	1	1	0.933333	1
1	1	1	0.933333	1	1	1	0.4	0.428571	0.266667	0.333333	0.2	0.333333
1.5	0.466667	0.6	0.533333	1	1	0.866667	0.0666667	0.142857	0.133333	0	0.0666667	0.0666667
2	0.0666667	0.266667	0.2	0.866667	0.866667	0.666667	0	0	0	0	0	0
2.5	0	0.0666667	0.0666667	0.666667	0.666667	0.666667	0	0	0	0	0	0
3	0	0.0666667	0.0666667	0.466667	0.6	0.466667	0	0	0	0	0	0
3.5	0	0	0.0666667	0.466667	0.533333	0.266667	0	0	0	0	0	0
4	0	0	0.0666667	0.2	0.533333	0.266667	0	0	0	0	0	0
4.5	0	0	0.0666667	0.133333	0.533333	0.133333	0	0	0	0	0	0
5	0	0	0	0.0666667	0.266667	0.0666667	0	0	0	0	0	0
5.5	0	0	0	0	0.133333	0	0	0	0	0	0	0
6	0	0	0	0	0.133333	0	0	0	0	0	0	0
