# Supplementary material for: Flower/FLWR-1 regulates neuronal activity via the plasma membrane Ca2+ ATPase to promote recycling of synaptic vesicles
Source: eLife. 2025 May 20;13:RP103870. doi: 10.7554/eLife.103870 (PMC12092002; doi:10.7554/eLife.103870)
Supplement: Figure 4—figure supplement 1—source data 1. [file elife-103870-fig4-figsupp1-data1.xlsx]

## Sheet: FigS4_1A
wild type	flwr-1
383.301	695.08
683.941	337.124
564.136	492.743
325.034	211.181
486.83	440.127
474.602	354.222
287.595	485.289
176.307	499.912
366.032	766.159
602.745	954.67
412.435	902.296
654.414	495.163
611.745	1406.4
182.805	465.988
476.74	950.81
606.934	547.663
375.339	295.242
679.121	376.368
676.913	450.362
933.726	263.177
455.471	139.45
501.075	485.808
275.023	356.798
587.248	486.346
342.395	334.024
545.659	472.694
437.173	258.18
	144.37
	224.638
	699.162
	179.201
	298.826

## Sheet: FigS4_1C
wild type	flwr-1
0.10839	0.0977217
0.537052	0.711326
0.266118	0.302599
0.44516	0.951517
0.626396	0.412089
0.523879	0.464896
0.376768	0.648372
0.826697	0.513474
0.289197
0.397924	0.17213
	0.390347
0.0667818	0.191012
0.117671	0.595516
0.400296	0.331044
0.453475	0.714869
0.732189	0.149292
0.498318	0.681233
0.214087	0.416534
0.393332	0.217556
0.797941	0.340643
0.471144	0.110762
0.565816	0.875154
0.336491	0.562801
0.461692	0.573045
0.445622
0.68111
0.379482
0.561497
0.800493
0.88025
