# Supplementary material for: Flower/FLWR-1 regulates neuronal activity via the plasma membrane Ca2+ ATPase to promote recycling of synaptic vesicles
Source: eLife. 2025 May 20;13:RP103870. doi: 10.7554/eLife.103870 (PMC12092002; doi:10.7554/eLife.103870)
Supplement: Figure 4—source data 1. [file elife-103870-fig4-data1.xlsx]

## Sheet: Fig4A+B
Marked blue are outliers as detected by GraphPad outlier detection of signal size (iterative Grubbs; alpha = 0.01)
Time (s)	wild type
0.2	-0.1279	0.012367	-0.0243	-0.01853	-0,00378*	0.001206	0.087225	-0.16137	-0.11295	0.02699	0.025816	0.018107	-0.01796	0.050227	-0.02054	0.003109	0.110319	0.192982	0.156625	0.188944	0,600792*	-0.00981	0.051007	0.026039	-0,13673*	0.010264	-0.08104	-0.62542	0.07848	0.019936	0.004915	0.010387	0,710418*	0.005516	-0.01678	0.034856	0.079643	0.034716	-0.05483	-0.61988	0.019167	0.104369	-0.03068	-0.03757
0.4	-0.13371	0.014889	-0.02218	-0.00946	-0,00902*	-0.00468	0.08863	-0.15796	-0.12801	0.025351	0.02079	-0.00594	-0.00178	0.034268	-0.00225	0.003186	0.076816	0.16819	0.154829	0.167788	0,527674*	0.01292	0.064783	0.033784	-0,14558*	0.010465	-0.08746	-0.65617	0.080934	0.024885	-0.00399	0.007665	0,497038*	0.030345	-0.05951	0.033741	0.057275	0.051126	-0.02281	-0.61575	0.001186	0.106451	-0.00445	-0.03235
0.6	-0.1055	0.021497	-0.01879	-0.01103	-0,00154*	0.021529	0.100855	-0.13416	-0.10973	0.020534	0.016521	0.000567	-0.02029	0.015814	-0.00177	0.00508	0.03866	0.120413	0.148636	0.112803	0,458116*	-0.04467	0.015777	0.022905	-0,16159*	-0.00122	-0.09344	-0.68139	0.084595	0.030275	-0.00197	-0.00271	0,364858*	-0.00631	-0.02737	0.035254	0.044218	0.035236	-0.04014	-0.60814	-0.00454	0.093277	-0.02248	0.018291
0.8	0.020666	0.025866	-0.00192	-0.00431	-0,02177*	0.043089	0.100803	-0.11876	-0.05841	0.017273	0.012717	0.004319	-0.0123	0.015921	-0.00665	0.006031	0.001402	0.111008	0.150834	0.055392	0,360734*	-0.01017	0.073168	0.032773	-0,16519*	-0.00719	-0.05395	-0.67384	0.094547	0.024127	-0.00927	0.011821	0,249994*	0.015032	0.000257	0.018889	0.037069	0.053494	-0.00918	-0.59571	0.007339	0.104947	-0.01655	-0.04649
1	0.064346	0.005593	0.003206	0.009174	-0,01679*	0.041083	0.092803	-0.09993	-0.0808	0.014148	0.009848	0.002129	-0.00507	0.004094	-0.02673	0.011276	-0.02451	0.082054	0.132896	0.007923	0,329753*	0.004783	0.046275	0.023013	-0,15045*	0.010317	-0.03447	-0.59657	0.074301	0.025027	-0.01753	0.004687	0,14852*	-0.00344	0.002099	0.026201	0.052081	0.048889	-0.00351	-0.48617	-0.0088	0.090661	-0.03653	0.017672
1.2	0.027622	0.007764	-0.00218	0.016058	-0,03438*	0.073309	0.117727	-0.09089	-0.0897	0.005074	0.018476	0.019222	-0.00536	0.025371	-0.01387	0.015948	-0.03985	0.050862	0.124564	-0.03447	0,294344*	-0.04782	0.012815	0.027277	-0,1327*	0.011192	-0.04423	-0.46773	0.052131	0.018271	-0.01826	0.004144	0,079348*	-0.01343	-0.01684	0.018595	0.042378	0.019642	-0.00888	-0.24548	-0.01029	0.100395	-0.01928	-0.00417
1.4	-0.02242	0.010009	0.001129	0.012175	-0,01221*	0.049916	0.03009	-0.06944	-0.09119	0.011099	0.014106	0.02973	-0.0206	0.001317	0.0107	0.039088	-0.0507	0.053817	0.121842	-0.07214	0,2624*	0.027781	0.018141	0.020618	-0,11007*	0.005288	-0.06367	-0.2758	0.040265	0.029182	-0.02851	0.002982	0,050328*	-0.03911	-0.00175	0.019539	0.013595	0.035258	-0.00332	-0.10803	-0.00553	0.106069	-0.01297	0.075882
1.6	-0.04809	0.017696	-0.01612	0.007627	-0,00614*	-0.0009	-0.04193	-0.051	-0.04347	0.003744	0.005702	0.017203	-0.04009	0.012776	-0.00568	0.027161	-0.05543	0.029518	0.129886	-0.10027	0,200526*	0.043963	0.000674	0.009024	-0,10126*	-0.00313	-0.03152	-0.07321	0.029291	0.018888	-0.00046	-0.00111	-0,00455*	-0.01273	0.003053	0.020038	-0.02907	0.028233	0.003045	0.007834	-0.01299	0.096607	-0.00937	0.024182
1.8	-0.03008	0.008044	-0.0327	0.002813	-0,00797*	0.053198	-0.11761	-0.03751	-0.01984	-0.00072	0.004116	0.00885	-0.03681	0.018712	0.002789	0.022578	-0.04723	0.015797	0.126529	-0.11227	0,149599*	0.051404	0.007883	0.008529	-0,10272*	-0.00762	-0.01654	0.059795	0.027356	0.01279	0.032705	-0.00035	-0,05243*	0.01822	-0.00491	0.027076	-0.03701	0.04003	0.005206	0.076224	-0.00769	0.077443	0.00396	0.032918
2	-0.00548	0.00769	-0.02128	0.009325	0,004979*	0.02292	-0.17359	-0.01631	-0.03357	-0.00782	0.001607	0.010856	-0.02872	0.013401	-0.00588	0.015675	-0.04176	0.014022	0.124852	-0.1257	0,087961*	-0.0109	-0.01534	0.006508	-0,07923*	0.013953	-0.01791	0.147067	0.055618	0.021876	0.023123	0.007596	-0,06441*	0.034376	0.035604	0.018252	0.014887	0.001442	0.010825	0.124577	0.008031	0.069652	-0.00833	0.096317
2.2	-0.01224	0.001752	0.001501	0.006607	0,00973*	0.00979	-0.10534	0.007294	-0.05722	0.000561	-0.00735	0.015533	-0.01947	0.002232	0.01543	0.015102	-0.04865	0.020365	0.125121	-0.11192	0,055784*	0.051886	0.031546	0.0099	-0,06081*	0.006471	-0.00035	0.191839	0.100011	0.024207	0.029059	0.017917	-0,12143*	-0.00411	0.010102	0.019249	0.016403	0.022992	0.009424	0.170878	-0.0036	0.039953	0.025009	0.031323
2.4	-0.0101	-0.007	0.010335	0.006111	0,013383*	-0.0161	0.053035	0.029465	-0.074	-0.00464	-0.00468	0.007695	-0.01206	0.000445	-0.01252	0.011993	-0.03893	-0.00387	0.078667	-0.09462	-0,00345*	0.027618	-0.01975	-0.00149	-0,05507*	-0.00127	0.000293	0.267196	0.065565	0.002691	0.046409	-0.00066	-0,1385*	0.001006	0.015134	0.013233	0.027784	0.011792	0.004756	0.204293	-0.00102	0.042831	0.012228	0.055138
2.6	0.020588	-0.01178	0.002053	0.002354	0,006167*	0.020988	0.01865	0.041414	-0.01653	0.002961	-0.00762	0.009663	-0.00818	-0.00075	-0.00696	0.011921	-0.02439	-0.00365	-0.01904	-0.07878	-0,11204*	0.005702	0.015747	-0.00498	-0,04262*	0.000951	0.008548	0.265249	0.041916	0.006061	0.035308	-0.00851	-0,13245*	-0.01441	0.029314	0.009131	0.036754	-0.01066	0.00857	0.208698	0.000343	0.042113	0.030803	0.038059
2.8	0.104229	-0.0076	0.001517	-0.00238	0,009375*	-0.03355	0.034137	0.04552	0.023223	0.002834	-0.01073	-0.0036	0.010152	-0.01764	0.016834	0.010509	-0.01658	-0.00839	-0.12297	-0.04825	-0,20319*	0.054106	0.051654	-0.01884	-0,04476*	-0.00767	0.001584	0.270789	0.039941	0.003021	0.0187	0.005074	-0,10113*	-0.00672	0.003699	0.00832	0.039496	-0.02777	0.011847	0.215975	-0.0153	0.009268	0.012397	-0.05653
3	0.125266	-0.00493	0.004919	-0.0058	0,011585*	-0.06822	0.099959	0.06986	0.063776	-0.01093	-0.00303	0.005664	0.019878	-0.01863	0.010432	-0.00592	-0.01033	-0.02373	-0.1937	-0.03451	-0,31099*	-0.00148	-0.03654	-0.01592	-0,05135*	-0.00314	0.02138	0.284463	0.075721	0.002515	0.005105	-0.00392	-0,16198*	-0.01722	-0.0022	-0.00333	0.045972	-0.00546	-0.00049	0.236359	-0.01106	-0.04434	0.012536	-0.04899
3.2	0.079875	-0.01468	0.012434	-0.00587	-0,00831*	0.004039	0.095654	0.080359	0.128368	-0.00436	-0.0089	-0.00285	0.014452	-0.01942	0.010852	-0.0137	-0.0057	-0.01933	-0.24797	-0.01097	-0,39805*	-0.01523	-0.05775	-0.02415	-0,04771*	0.002927	0.034632	0.300821	0.073779	-0.01274	0.005	-0.0145	-0,15111*	0.014189	0.008261	-0.01044	0.047473	-0.00664	-7.2e-05	0.236347	-0.01081	-0.01207	-0.00705	0.02968
3.4	0.033861	-0.01144	-0.00168	-0.00191	0,003988*	-0.01709	0.108668	0.093508	0.09317	-0.00923	-0.01263	-0.0066	0.018813	-0.01008	0.015169	-0.01922	-0.00952	-0.0278	-0.25309	-0.00541	-0,41202*	-0.08158	0.011816	-0.04141	-0,00241*	0.000123	0.039376	0.289291	0.033717	-0.0312	0.028248	0.014572	-0,16131*	0.023731	0.001075	-0.01746	0.041501	-0.02908	0.006533	0.229313	0.000176	-0.02636	0.023293	0.080785
3.6	0.012398	-0.01696	0.013119	0.003218	-0,01263*	-0.07003	0.086366	0.086189	0.085771	-0.00574	-0.01174	-0.00994	0.015784	-0.00849	-0.00659	-0.03377	0.003861	-0.06201	-0.22968	-0.0002	-0,39827*	-0.05447	-0.02931	-0.0371	0,066649*	-0.01147	0.042531	0.248844	-0.02935	-0.01848	0.020435	0.011012	-0,15873*	0.01	0.009697	-0.02436	0.044205	-0.03418	0.01056	0.225781	-0.00268	-0.0942	0.009559	-0.02521
3.8	0.005948	-0.0157	-0.00551	0.000371	-0,01606*	-0.00793	0.081983	0.093303	0.053318	-0.01686	-0.00528	-0.01805	0.033413	-0.01393	0.017329	-0.02094	0.02859	-0.10292	-0.18754	0.027739	-0,35093*	0.018631	-0.08894	-0.03422	0,181878*	-0.00796	0.0506	0.263758	-0.08986	-0.01412	0.008359	-0.0054	-0,14707*	0.022007	-0.0094	-0.03823	0.011889	-0.039	0.013225	0.222785	0.003632	-0.15418	0.039329	0.019743
4	-0.00196	-0.01235	0.003851	0.00021	-0,00715*	-0.04077	0.025274	0.083062	0.039535	-0.01411	-0.02287	-0.0165	0.025869	-0.02407	-0.00211	-0.01163	0.033146	-0.11489	-0.14692	0.039139	-0,30191*	0.008351	-0.07266	-0.03635	0,223363*	-0.00055	0.052211	0.291715	-0.13669	-0.01384	-0.02027	-0.00567	-0,18399*	0.006902	-0.01508	-0.0291	-0.0321	-0.06291	0.010898	0.227454	0.029542	-0.19459	0.037402	-0.04925
4.2	-0.01153	-0.00553	0.020626	-0.00233	0,023135*	-0.00536	-0.06022	0.069305	0.099484	-0.01362	-0.01441	-0.01924	0.008401	0.000259	0.002482	-0.01207	0.033967	-0.12309	-0.10091	0.044856	-0,21696*	0.008071	-0.09048	-0.01186	0,232668*	-0.00856	0.069856	0.266661	-0.17762	-0.02701	-0.03661	0.002472	-0,14391*	-0.02353	0.003794	-0.03921	-0.07738	-0.06177	0.01354	0.221136	0.013193	-0.24358	-0.0058	-0.05418
4.4	-0.03884	-0.0094	0.028353	-0.00196	0,010106*	-0.03805	-0.15766	0.072696	0.137712	-0.0112	-0.01461	-0.02184	0.020038	-0.02076	0.008876	-0.01033	0.030717	-0.11995	-0.05649	0.052882	-0,21347*	-0.01793	-0.07143	-0.00873	0,277604*	0.000621	0.070572	0.290598	-0.2049	-0.04382	-0.03246	-0.01858	-0,17513*	0.017554	0.010459	-0.03715	-0.12126	-0.01443	0.014572	0.226723	0.007132	-0.24564	-0.00748	-0.00746
4.6	-0.02386	-0.00684	0.027437	-0.00615	0,030215*	-0.01163	-0.25381	0.081544	0.107452	-0.01734	-0.00897	-0.01993	0.021948	-0.04051	-0.01453	-0.03299	0.028578	-0.11785	-0.02477	0.064208	-0,20183*	-0.00818	0.048861	0.002183	0,294496*	0.001602	0.057595	0.30352	-0.21266	-0.04945	-0.02983	-0.02716	-0,12154*	0.002064	-0.00825	-0.05203	-0.15982	-0.03892	0.012686	0.223118	0.006745	-0.06954	-0.0006	-0.06791
4.8	0.076893	-0.00896	0.016179	-0.00631	0,035076*	-0.02676	-0.3117	0.083813	0.083578	-0.01399	0.003105	-0.02506	0.039912	-0.02057	0.015181	-0.03808	0.027526	-0.13154	0.00781	0.067833	-0,20458*	-0.01298	0.03206	0.012504	0,3136*	-0.01438	0.075406	0.308501	-0.19708	-0.05309	-0.05821	-0.01176	-0,08083*	-0.05993	0.029534	-0.05105	-0.19599	-0.05204	0.007556	0.221663	-0.00217	0.000448	-0.02494	-0.08987
5	0.045889	-0.01263	0.016378	-0.00274	0,037584*	-0.00655	-0.35205	0.082027	0.066082	-0.01193	-0.00881	-0.02207	0.027002	-0.01368	0.002755	-0.05308	0.022557	-0.15939	0.02052	0.06665	-0,21998*	0.004303	-0.04735	0.036398	0,322963*	-0.0218	0.093821	0.277383	-0.17287	-0.06403	-0.09606	-0.03756	-0,01747*	-0.05881	-0.00985	-0.04988	-0.23218	-0.06201	0.009417	0.219467	-0.06642	0.009271	-0.00856	-0.00423
5.2	0.048942	-0.02886	0.036431	-0.00379	0,066334*	-0.01814	-0.38849	0.134968	0.060651	-0.03549	-0.00185	-0.04167	0.022	-0.01386	-0.00824	-0.03688	0.048613	-0.16549	0.037212	0.056293	-0,17626*	-0.03492	-0.09868	0.034528	0,569262*	-0.02877	0.07141	0.217611	-0.16432	-0.05154	-0.12318	-0.08179	0,178416*	-0.02234	-0.01185	-0.056	-0.26257	-0.05185	-0.00593	0.197011	-0.1061	0.000965	-0.01085	-0.00349
5.4	0.05459	-0.03612	0.077039	0.0263	0,136478*	0.057254	-0.38218	0.237518	0.192296	-0.03481	0.033176	-0.0555	0.027453	0.006028	0.035209	-0.02287	0.237493	-0.18441	0.078192	0.084032	0,205503*	-0.03408	0.017205	0.056062	0,970583*	-0.02517	0.077306	0.157352	0.007118	-0.02662	-0.11439	-0.11108	2,978752*	-0.00097	-0.00401	-0.03908	-0.19399	0.01486	-0.01783	0.193789	-0.02695	0.035614	-0.00429	-0.01912
5.6	0.054118	-0.03766	0.085217	0.053528	0,239573*	0.102818	-0.30868	0.319283	0.281329	-0.02181	0.051188	-0.06234	0.046266	0.017102	0.053761	-0.00526	0.385126	-0.19659	0.115947	0.113107	0,533106*	-0.02047	0.045817	0.078971	1,254014*	-0.01486	0.091288	0.10844	0.091276	-0.00896	-0.0871	-0.11957	4,324985*	-0.04419	-0.01989	-0.03557	-0.08821	0.042766	-0.01677	0.196001	0.005491	0.015259	-0.02909	0.039225
5.8	0.06484	-0.0356	0.110215	0.063649	0,374323*	0.110344	-0.22114	0.387414	0.306848	-0.00622	0.059702	-0.06612	0.050961	0.031935	0.061377	0.00929	0.453182	-0.19275	0.119736	0.136221	0,733346*	-0.02536	0.060031	0.0772	1,428521*	-0.00821	0.07373	0.063894	0.104481	0.005172	-0.05426	-0.12627	4,485632*	-0.06603	0.006283	-0.01246	-0.05032	0.054467	-0.02474	0.185731	0.020914	-0.00041	-0.03746	0.123238
6	0.080769	-0.03185	0.109445	0.075753	0,494026*	0.120353	-0.17734	0.442254	0.341055	0.003821	0.076015	-0.066	0.052716	0.038805	0.059573	0.016881	0.483677	-0.20512	0.126621	0.158497	0,874007*	-0.02442	0.048165	0.081952	1,566689*	-0.00485	0.052752	0.039421	0.113314	0.017089	-0.02635	-0.12699	4,405041*	-0.02998	-0.00385	0.009549	-0.01557	0.064043	-0.01649	0.185969	0.025278	-0.02451	0.001628	0.246954
6.2	0.089192	-0.03028	0.123431	0.087665	0,644571*	0.13493	-0.11957	0.491148	0.365059	0.003936	0.086161	-0.07243	0.059679	0.033762	0.059368	0.026537	0.497534	-0.2207	0.141869	0.172639	0,994851*	-0.03296	0.055807	0.089637	1,659357*	-0.00387	0.069072	0.009144	0.110444	0.018486	-0.00171	-0.11086	4,449857*	-0.01127	-0.01426	0.027186	-0.01554	0.072149	-0.03935	0.174149	0.03535	-0.03163	-0.02111	0.180496
6.4	0.099705	-0.02852	0.113496	0.100178	0,76465*	0.121536	-0.08055	0.528897	0.36195	0.018714	0.085131	-0.06443	0.059329	0.029302	0.061876	0.048715	0.5034	-0.19406	0.142016	0.190379	1,085367*	-0.02043	0.071513	0.089298	1,71326*	-0.00216	0.10125	-0.04813	0.111954	0.022509	-0.0008	-0.09935	4,370105*	-0.03355	-0.01496	0.049054	-0.00967	0.083637	-0.02423	0.168075	0.039057	-0.06017	-0.02483	0.175985
6.6	0.108096	-0.03356	0.125748	0.11823	0,944395*	0.11678	-0.01803	0.555027	0.398023	0.016738	0.074832	-0.06402	0.051923	0.035182	0.067149	0.05401	0.50113	-0.20086	0.140673	0.203965	1,100873*	-0.01287	0.071967	0.095837	1,769876*	0.002686	0.140491	-0.05168	0.117386	0.022557	0.011729	-0.08923	4,32457*	-0.03777	-0.02186	0.071941	0.002549	0.083129	-0.03507	0.173804	0.055979	-0.07593	-0.01437	0.298642
6.8	0.113269	-0.03619	0.122646	0.126532	1,074841*	0.118418	-0.02915	0.5923	0.411151	0.025837	0.05619	-0.05918	0.060032	0.020483	0.066921	0.046462	0.498152	-0.20056	0.132191	0.202036	1,126604*	-0.01034	0.062337	0.092429	1,809188*	0.00293	0.139298	-0.11754	0.120525	0.028714	0.038848	-0.07933	4,349904*	-0.03901	0.004926	0.098997	0.006672	0.084183	-0.03035	0.148089	0.065786	-0.0972	-0.00662	0.293727
7	0.11726	-0.03221	0.14797	0.132105	1,224901*	0.11866	-0.1215	0.592165	0.425649	0.027395	0.076948	-0.05931	0.010101	0.003854	0.066145	0.053173	0.494985	-0.1991	0.132513	0.200764	1,138365*	0.003194	0.053102	0.105363	1,833501*	0.010176	0.157114	-0.16847	0.113572	0.037083	0.041569	-0.07115	4,321225*	-0.07475	0.003565	0.119383	0.002564	0.081229	-0.04288	0.094352	0.076851	-0.10312	-0.04085	0.30977
7.2	0.123561	-0.03385	0.153803	0.137332	1,358486*	0.113011	-0.23587	0.61764	0.450977	0.03171	0.078896	-0.06111	0.070117	-0.00502	0.064784	0.034716	0.499849	-0.20798	0.131552	0.200545	1,162937*	0.010634	0.060547	0.097086	1,870436*	0.014882	0.14943	-0.24429	0.114577	0.026309	0.041864	-0.07436	4,355968*	-0.10045	-0.01479	0.149913	0.013313	0.081255	-0.05868	0.030154	0.075956	-0.11268	0.01176	0.218521
7.4	0.123254	-0.03174	0.149305	0.147487	1,50826*	0.123872	-0.33933	0.631169	0.47008	0.039206	0.074994	-0.05781	0.091589	-0.00272	0.062987	0.030491	0.503321	-0.2017	0.122239	0.196846	1,202111*	0.002606	0.062724	0.100485	1,866774*	0.018119	0.178135	-0.38122	0.130643	0.027171	0.037838	-0.07487	4,308526*	-0.16191	0.027125	0.174501	0.021583	0.076376	-0.0532	-0.01878	0.079912	-0.12365	0.022154	0.349425
7.6	0.12037	-0.03333	0.154848	0.157605	1,591103*	0.122447	-0.43754	0.636779	0.484533	0.038416	0.070665	-0.05409	0.107949	-0.00955	0.06848	0.045476	0.498182	-0.196	0.12424	0.194165	1,199587*	-0.01	0.057297	0.095146	1,882275*	0.029017	0.182903	-0.47357	0.121652	0.029447	0.032999	-0.07422	4,370031*	-0.23375	-0.00047	0.197615	0.042271	0.075703	-0.04761	-0.08114	0.090747	-0.09843	0.020434	0.282337
7.8	0.122268	-0.02876	0.154208	0.159183	1,659484*	0.125369	-0.52356	0.650855	0.485245	0.039665	0.064135	-0.03111	0.11029	-0.01396	0.07227	0.039305	0.490999	-0.20051	0.119087	0.188364	1,202803*	-0.00546	0.06261	0.104522	1,880395*	0.036689	0.185051	-0.54775	0.113943	0.025628	0.048727	-0.06871	4,377966*	-0.26972	0.017626	0.20122	0.045991	0.075785	-0.04637	-0.13444	0.095519	-0.09606	0.004803	0.283991
8	0.128356	-0.02773	0.165202	0.159053	1,711049*	0.126217	-0.59529	0.65358	0.500196	0.044215	0.069219	-0.02757	0.108172	-0.02337	0.06768	0.037384	0.482963	-0.18917	0.117987	0.18393	1,213291*	0.00369	0.062215	0.085737	1,878751*	0.035893	0.200384	-0.58968	0.124939	0.002077	0.061305	-0.06668	4,344651*	-0.25262	0.035864	0.198962	0.053225	0.072339	-0.04565	-0.19992	0.092383	-0.10101	-0.02486	0.190065
8.2	0.130017	-0.0302	0.161587	0.159994	1,758506*	0.127758	-0.63707	0.655282	0.502088	0.049107	0.058227	-0.01739	0.106703	-0.01843	0.068904	0.034973	0.472379	-0.19067	0.116893	0.18663	1,194321*	0.028132	0.062606	0.077557	1,870837*	0.03705	0.212885	-0.60349	0.133379	0.000367	0.066482	-0.0621	4,350595*	-0.21434	0.027694	0.200389	0.055126	0.066082	-0.02991	-0.25775	0.09549	-0.10154	0.003892	0.291073
8.4	0.130354	-0.03523	0.163464	0.15521	1,811705*	0.13549	-0.67527	0.669128	0.500046	0.053765	0.06235	-0.01802	0.111297	-0.01885	0.074064	0.033272	0.468224	-0.16898	0.119096	0.189944	1,197082*	0.00854	0.073346	0.071356	1,895553*	0.036682	0.22517	-0.61895	0.135665	-0.0035	0.068185	-0.06775	4,28803*	-0.1915	0.015906	0.206685	0.058407	0.061117	-0.03498	-0.31561	0.105622	-0.09902	0.002108	0.286062
8.6	0.134407	-0.03191	0.169349	0.15895	1,801741*	0.123998	-0.70188	0.679558	0.523255	0.050811	0.062583	-0.02552	0.110065	-0.02704	0.069192	0.028472	0.466663	-0.20484	0.126885	0.189422	1,200006*	0.013264	0.05973	0.059271	1,852213*	0.034779	0.226035	-0.58172	0.134947	0.024325	0.071192	-0.06102	4,226949*	-0.13959	0.023955	0.215932	0.060177	0.070388	-0.05615	-0.36546	0.106217	-0.09769	-0.0084	0.26308
8.8	0.133746	-0.03661	0.167058	0.166595	1,781522*	0.130523	-0.71987	0.67854	0.536158	0.056613	0.065187	-0.02247	0.113443	-0.04473	0.069201	0.027564	0.457026	-0.18473	0.145639	0.189647	1,177523*	0.007172	0.065051	0.056231	1,838478*	0.032799	0.241938	-0.50834	0.13004	0.033006	0.087276	-0.06474	4,24315*	-0.0887	0.00984	0.223346	0.058907	0.064088	-0.07158	-0.403	0.105306	-0.04268	-0.01731	0.190112
9	0.131996	-0.04844	0.169916	0.166587	1,789149*	0.138998	-0.72209	0.679835	0.541377	0.059789	0.056175	-0.02344	0.10626	-0.04628	0.069049	0.036427	0.450904	-0.16746	0.150196	0.200253	1,144899*	0.017205	0.05694	0.050491	1,827597*	0.032664	0.251651	-0.44417	0.131424	0.030554	0.101308	-0.05849	4,25596*	-0.0693	0.008676	0.219078	0.057094	0.06422	-0.07003	-0.43413	0.113334	-0.06113	-0.03461	0.138472
9.2	0.13892	-0.06094	0.174205	0.167461	1,814346*	0.139091	-0.70467	0.693962	0.569917	0.048135	0.06358	-0.02633	0.12249	-0.05399	0.068778	0.039404	0.444163	-0.16388	0.154101	0.203189	1,122779*	0.0081	0.071713	0.04947	1,803949*	0.039683	0.256454	-0.39446	0.126446	0.028029	0.09759	-0.05554	4,184243*	-0.06242	-0.03431	0.218031	0.062259	0.064461	-0.0479	-0.45522	0.110516	-0.05209	-0.01627	0.220532
9.4	0.144934	-0.0558	0.170055	0.161559	1,826535*	0.13549	-0.68717	0.710179	0.574544	0.061802	0.059492	-0.02358	0.129017	-0.07652	0.047419	0.030465	0.444891	-0.15001	0.164556	0.201869	1,104852*	-0.00084	0.060152	0.044918	1,780519*	0.042833	0.250133	-0.3208	0.121269	0.029031	0.100409	-0.04235	4,150698*	-0.05512	-0.02755	0.221153	0.063227	0.05646	-0.05137	-0.47485	0.10551	-0.0024	-0.02237	0.257308
9.6	0.147573	-0.06298	0.174644	0.163636	1,852105*	0.123838	-0.67543	0.703111	0.578393	0.06112	0.057164	-0.03316	0.128207	-0.11044	0.018349	0.02604	0.436985	-0.15835	0.185957	0.219135	1,100352*	-0.02427	0.04554	0.042333	1,779325*	0.040356	0.268652	-0.25174	0.121205	0.022086	0.095507	-0.03483	4,187349*	-0.02731	0.015503	0.210553	0.060339	0.053132	-0.05478	-0.4884	0.112961	0.006691	-0.01626	0.25782
9.8	0.139859	-0.06308	0.172826	0.163814	1,812326*	0.123873	-0.63977	0.700107	0.595683	0.061561	0.059888	-0.03293	0.125604	-0.16134	0.005485	0.024612	0.435018	-0.1602	0.200191	0.221204	1,077407*	-0.02499	0.03019	0.047696	1,774739*	0.039459	0.27499	-0.22854	0.124581	0.029476	0.090973	-0.02666	4,104427*	-0.02748	-0.01423	0.208161	0.067879	0.055485	-0.05537	-0.49543	0.113852	0.040908	-0.0229	0.398174
10	0.135593	-0.06179	0.174845	0.160059	1,785821*	0.12217	-0.58746	0.705858	0.605705	0.058034	0.066408	-0.03972	0.117106	-0.21701	0.026897	0.022099	0.432523	-0.15967	0.204706	0.215364	1,079272*	-0.02276	0.020741	0.052819	1,781758*	0.040626	0.266969	-0.20706	0.120669	0.031525	0.097567	-0.02319	4,192768*	-0.01833	0.001015	0.211835	0.067372	0.055871	-0.04344	-0.49498	0.118418	0.036251	-0.00913	0.292501
10.2	0.137329	-0.05767	0.176092	0.164243	1,755566*	0.124861	-0.54938	0.706174	0.581249	0.054685	0.064179	-0.04019	0.123626	-0.268	0.033444	0.01314	0.423413	-0.16634	0.211574	0.201914	1,127722*	-0.02061	0.034074	0.062359	1,777806*	0.038453	0.2573	-0.17129	0.124569	0.040431	0.095092	-0.01131	4,129889*	-0.01576	-0.00205	0.203844	0.07286	0.053369	-0.04258	-0.49274	0.109426	0.013754	-0.00461	0.327134
10.4	0.141102	-0.05505	0.178206	0.163789	1,757333*	0.129133	-0.48266	0.718617	0.576932	0.059639	0.058608	-0.03976	0.112728	-0.30346	0.030696	0.022344	0.415512	-0.14676	0.213672	0.203978	1,137254*	-0.01454	0.026242	0.073736	1,757259*	0.037522	0.247394	-0.12531	0.118177	0.051619	0.098844	-0.0125	4,184741*	-0.00435	0.027306	0.201627	0.075402	0.050987	-0.03639	-0.48284	0.106172	-0.0546	-0.02512	0.288371
10.6	0.137639	-0.04901	0.171977	0.163385	1,774281*	0.131989	-0.41646	0.725104	0.57958	0.058252	0.059539	-0.04034	0.109717	-0.33282	0.027269	0.025069	0.41084	-0.16453	0.202141	0.203592	1,133272*	0.014517	0.030516	0.078624	1,764413*	0.03901	0.248074	-0.08346	0.120569	0.051581	0.105004	-0.00236	4,126452*	-0.02161	0.002304	0.205299	0.074826	0.055712	-0.02877	-0.46212	0.111348	-0.12096	0.01677	0.336155
10.8	0.14923	-0.05629	0.177438	0.162958	1,731973*	0.12092	-0.32156	0.713252	0.583439	0.054672	0.058779	-0.04305	0.1198	-0.33957	0.040024	0.022031	0.402091	-0.15646	0.205462	0.188284	1,112342*	0.006626	0.030317	0.07361	1,787799*	0.045656	0.274646	-0.08121	0.123907	0.047325	0.103251	0.009091	4,127613*	-0.02795	0.00859	0.198387	0.076894	0.058355	-0.03999	-0.45099	0.11087	-0.18178	-0.00594	0.3472
11	0.134257	-0.06043	0.175229	0.165141	1,746381*	0.118735	-0.23652	0.723019	0.620039	0.049027	0.056068	-0.05105	0.122282	-0.34585	0.038548	0.031256	0.392547	-0.15247	0.201013	0.191678	1,080879*	0.012422	0.032874	0.077941	1,786972*	0.036679	0.255681	-0.13908	0.114832	0.050423	0.098509	0.0085	4,005598*	-0.03014	-0.00388	0.195917	0.078791	0.067166	-0.05581	-0.4369	0.104052	-0.2391	-0.00397	0.344058
11.2	0.129965	-0.05003	0.178095	0.171354	1,776416*	0.110804	-0.19752	0.729016	0.622668	0.047009	0.05964	-0.03104	0.114913	-0.33827	0.041502	0.037451	0.383275	-0.1527	0.195515	0.191903	1,066582*	0.025116	0.01382	0.073872	1,755285*	0.034943	0.233688	-0.185	0.126379	0.059051	0.091607	0.005213	4,039097*	-0.05187	0.012583	0.194642	0.077402	0.06858	-0.08037	-0.43939	0.102949	-0.29508	-0.01856	0.327443
11.4	0.110343	-0.04209	0.186295	0.17668	1,755755*	0.107085	-0.13882	0.701692	0.616392	0.052872	0.07326	-0.03119	0.102818	-0.31603	0.038293	0.046258	0.372139	-0.14608	0.196757	0.18746	1,075175*	0.026033	0.018309	0.083683	1,702949*	0.034345	0.206004	-0.22955	0.127071	0.075351	0.094918	0.001015	3,979564*	-0.02088	0.02678	0.192735	0.074939	0.066366	-0.04333	-0.43624	0.098227	-0.31702	-0.0045	0.281397
11.6	0.088682	-0.04234	0.188601	0.170653	1,774076*	0.114868	-0.09631	0.636084	0.625002	0.053613	0.066126	-0.03053	0.098188	-0.31346	0.047835	0.05561	0.368344	-0.14767	0.191267	0.175635	1,043388*	0.013126	0.022785	0.084064	1,635602*	0.034598	0.17703	-0.29948	0.119126	0.076617	0.093572	-0.00191	4,054238*	-0.04657	0.057433	0.189957	0.073272	0.074534	-0.04608	-0.43271	0.102342	-0.34639	-0.02544	0.253452
11.8	0.054481	-0.03722	0.189755	0.180933	1,706357*	0.112514	-0.07439	0.549503	0.632723	0.051778	0.065668	-0.03738	0.111029	-0.29814	0.046068	0.056247	0.352578	-0.14861	0.197463	0.174255	0,994148*	0.008876	0.020396	0.084329	1,593427*	0.034461	0.146577	-0.36785	0.126125	0.061538	0.095111	-0.00652	4,048395*	-0.02217	0.040691	0.194174	0.073334	0.070401	-0.06993	-0.42086	0.099253	-0.36385	-0.03705	0.31478
12	0.023102	-0.03134	0.190255	0.183779	1,581361*	0.107636	-0.06082	0.445891	0.650435	0.05023	0.06437	-0.04277	0.114424	-0.26459	0.046772	0.051512	0.345254	-0.14112	0.184386	0.172478	0,978484*	0.013679	0.019989	0.075646	1,588564*	0.031677	0.127014	-0.4078	0.115393	0.056406	0.092588	-6.6e-06	4,080457*	0.001498	0.046074	0.199662	0.074898	0.055918	-0.05591	-0.41622	0.08816	-0.36799	0.011212	0.429891
12.2	0.006348	-0.02725	0.196473	0.178377	1,411463*	0.112136	-0.02763	0.351883	0.686182	0.047383	0.076235	-0.05241	0.121465	-0.2581	0.050269	0.045034	0.343024	-0.129	0.170196	0.172546	0,955112*	0.031857	0.0268	0.076865	1,565679*	0.030921	0.107873	-0.45728	0.114648	0.056204	0.094011	-0.00733	4,087073*	0.012151	0.063969	0.192012	0.073314	0.045878	-0.04602	-0.39952	0.08222	-0.35579	-0.00038	0.328407
12.4	-0.00049	-0.02747	0.183708	0.176994	1,270626*	0.113049	-0.01233	0.261971	0.669408	0.041444	0.066149	-0.04866	0.111564	-0.251	0.054046	0.057853	0.337044	-0.13976	0.154561	0.171181	0,936327*	0.028545	0.049961	0.081509	1,565625*	0.035155	0.090952	-0.45205	0.11544	0.052582	0.087872	-0.00372	4,003589*	0.049116	0.054162	0.186991	0.072869	0.036819	-0.05025	-0.35107	0.091373	-0.33167	-0.01922	0.352496
12.6	0.00153	-0.02747	0.175785	0.178102	1,13828*	0.110027	-0.0249	0.181328	0.671835	0.038739	0.060864	-0.0463	0.10855	-0.25025	0.051272	0.052048	0.337372	-0.13063	0.147995	0.175668	0,922153*	0.022925	0.049469	0.079551	1,583868*	0.033259	0.076595	-0.46465	0.114957	0.060612	0.097857	-0.01111	4,006777*	0.075262	0.037316	0.193341	0.07668	0.03308	-0.0562	-0.31161	0.085483	-0.17457	0.006658	0.285979
12.8	0.007182	-0.02473	0.193371	0.177395	1,059299*	0.11949	-0.00268	0.127537	0.668228	0.047916	0.07018	-0.05726	0.112066	-0.24607	0.053418	0.059348	0.340186	-0.10584	0.14194	0.177741	0,886558*	0.026482	0.047157	0.075741	1,584606*	0.034148	0.065645	-0.50342	0.133034	0.057903	0.097856	-0.01192	4,038544*	0.029819	0.035539	0.194396	0.078088	0.046512	-0.03092	-0.26498	0.083536	-0.18419	-0.01927	0.376787
13	0.017469	-0.00889	0.197253	0.17545	0,983714*	0.127659	-0.01498	0.086002	0.644591	0.043553	0.070294	-0.05131	0.109449	-0.2451	0.051028	0.053554	0.334689	-0.1162	0.159525	0.172697	0,889193*	0.049089	0.020253	0.074078	1,588984*	0.031321	0.053936	-0.52778	0.132033	0.058532	0.09733	-0.01681	3,981609*	0.059114	0.050183	0.192288	0.074641	0.051377	-0.03357	-0.2174	0.074791	-0.17117	-0.01429	0.34789
13.2	0.019461	-0.00831	0.193202	0.174105	0,920809*	0.119545	0.004522	0.043726	0.650762	0.041228	0.070935	-0.04858	0.110713	-0.23037	0.046468	0.042688	0.332697	-0.12057	0.151113	0.162927	0,868511*	0.041474	0.025644	0.073187	1,602802*	0.029641	0.042551	-0.53411	0.119556	0.053305	0.115739	-0.01686	3,90159*	0.071195	0.0275	0.200703	0.071627	0.053793	-0.05168	-0.17193	0.07527	-0.14567	-0.0123	0.406779
13.4	0.030284	-0.01332	0.201482	0.167545	0,909624*	0.116345	-0.00026	0.022317	0.648381	0.037925	0.064654	-0.0472	0.125732	-0.21721	0.054308	0.041793	0.325896	-0.10037	0.155487	0.164557	0,833225*	0.038375	0.025436	0.093544	1,59552*	0.03264	0.033529	-0.55426	0.117355	0.046085	0.105267	-0.01396	3,927329*	0.069831	0.050159	0.19947	0.073529	0.051182	-0.04431	-0.17465	0.070631	-0.09298	-0.02734	0.305176
13.6	0.023555	-0.01654	0.198248	0.173184	0,881771*	0.126427	-0.0199	0.011505	0.649256	0.039803	0.054591	-0.04732	0.139171	-0.20968	0.055884	0.033768	0.320744	-0.10933	0.1544	0.151989	0,786398*	0.058657	0.023956	0.090259	1,588518*	0.030614	0.025043	-0.59704	0.112676	0.047328	0.123804	-0.01831	3,913082*	-0.02833	0.094659	0.199669	0.069801	0.059173	-0.03118	-0.16448	0.069087	-0.05993	-0.01948	0.262616
13.8	0.031377	-0.01203	0.199505	0.172275	0,901507*	0.119416	0.000198	0.014307	0.639091	0.044198	0.068948	-0.04786	0.155139	-0.206	0.059425	0.04789	0.310791	-0.10083	0.14676	0.146839	0,803773*	0.038278	0.027313	0.091305	1,578952*	0.028215	0.024519	-0.62743	0.114439	0.040854	0.129416	-0.01589	3,899599*	-0.17251	0.070544	0.201144	0.076257	0.066442	-0.0419	-0.05214	0.070744	-0.04196	-0.01392	0.300106
14	0.043188	-0.01215	0.198645	0.17656	0,926247*	0.116642	-0.02862	0.019494	0.661458	0.044453	0.065846	-0.04833	0.151184	-0.19964	0.058787	0.041976	0.30551	-0.09524	0.156027	0.135343	0,798199*	0.032246	0.003682	0.090691	1,567312*	0.026276	0.016687	-0.64511	0.102109	0.033075	0.128563	-0.01601	3,887425*	-0.2922	0.053807	0.210429	0.071491	0.069173	-0.03173	-0.05643	0.067394	-0.06259	-0.01921	0.362017
14.2	0.046734	-0.01654	0.209133	0.175926	0,947874*	0.109231	0.013244	0.045459	0.640517	0.04813	0.066454	-0.04697	0.160152	-0.19019	0.064971	0.039969	0.297078	-0.11395	0.14842	0.128094	0,782657*	0.04606	-0.08076	0.091575	1,543931*	0.027634	0.012738	-0.65771	0.107901	0.04121	0.130286	-0.01239	3,869289*	-0.37275	0.03365	0.213857	0.069959	0.074609	-0.03614	-0.05194	0.060551	-0.03244	-0.02558	0.185959
14.4	0.041388	-0.01987	0.198522	0.179767	0,934929*	0.108002	-0.00837	0.078471	0.629019	0.044632	0.068101	-0.05356	0.156068	-0.16777	0.068233	0.026394	0.296176	-0.09409	0.147103	0.116106	0,771264*	0.061769	-0.16405	0.079835	1,504814*	0.029926	0.008438	-0.64814	0.113482	0.04791	0.127472	-0.00762	3,833385*	-0.42529	-0.03425	0.211775	0.078038	0.076021	-0.05739	-0.05048	0.058125	0.008043	-0.03238	0.346117
14.6	0.044844	-0.01214	0.216466	0.18961	0,923678*	0.147555	0.038882	0.110989	0.621215	0.036908	0.070532	-0.05398	0.152013	-0.16528	0.06954	0.034296	0.28881	-0.09229	0.132144	0.109888	0,771916*	0.07	-0.25592	0.089895	1,494555*	0.030354	0.00637	-0.64678	0.106157	0.037902	0.131174	-0.00168	3,777077*	-0.41564	-0.05027	0.21135	0.07544	0.076169	-0.04038	-0.01307	0.058391	0.040105	-0.03049	0.152254
14.8	0.036357	-0.01235	0.201029	0.190117	0,921494*	0.144636	0.050014	0.148958	0.612306	0.027871	0.065519	-0.0516	0.150312	-0.17487	0.070732	0.038867	0.287602	-0.0976	0.131537	0.109561	0,766357*	0.04663	-0.29777	0.067671	1,503687*	0.032364	0.005525	-0.65489	0.090831	0.036849	0.129766	-0.00418	3,729248*	-0.4232	-0.06733	0.203026	0.077013	0.07723	-0.04727	-0.01408	0.059309	0.047351	-0.01792	0.317922
15	0.041718	-0.01259	0.218523	0.192398	0,944903*	0.143738	0.030804	0.206284	0.621398	0.034288	0.064044	-0.05611	0.149565	-0.15712	0.069277	0.032617	0.284208	-0.0792	0.13996	0.120361	0,771679*	0.053549	-0.35226	0.061249	1,515365*	0.033286	0.003814	-0.65999	0.086682	0.037671	0.130103	-0.00387	3,745163*	-0.37771	0.016983	0.201779	0.086034	0.079304	-0.03076	0.043127	0.049173	0.041957	-0.03101	0.316994
15.2	0.033321	-0.00743	0.192886	0.199464	0,947879*	0.141936	0.070919	0.204975	0.618835	0.041871	0.06422	-0.04681	0.156797	-0.14629	0.080784	0.041349	0.287574	-0.07712	0.143707	0.125479	0,718235*	0.048679	-0.35925	0.05936	1,451389*	0.046064	0.005518	-0.66498	0.077871	0.046256	0.134393	-0.00313	3,781012*	-0.37416	0.077569	0.191865	0.097272	0.08364	-0.03452	0.04415	0.050837	0.059255	0.001231	0.353329
15.4	-0.01191	-0.00769	0.156898	0.174228	0,882598*	0.101706	0.018913	0.161837	0.602774	0.020813	0.036617	-0.03863	0.1277	-0.20001	0.057897	0.027253	0.268234	-0.04024	0.121295	0.120462	0,54563*	0.030741	-0.42066	0.044921	1,261742*	0.045193	0.004012	-0.67082	0.031535	0.012917	0.108409	0.005163	3,434052*	-0.30293	0.073832	0.170826	0.094927	0.057784	-0.01662	0.020574	0.033641	0.061064	0.011997	0.395246
15.6	-0.0313	-0.01106	0.124754	0.159689	0,716329*	0.043487	0.033879	0.116335	0.548598	-0.00886	0.006962	-0.02869	0.112511	-0.26514	0.018295	0.009006	0.226366	-0.03379	0.096207	0.097462	0,43751*	-0.04949	-0.46801	0.012883	1,09155*	0.030523	0.000207	-0.66669	-0.02181	-0.01444	0.086458	-0.01694	2,893839*	-0.25074	0.147644	0.145329	0.095328	0.023911	-0.01187	0.014667	0.012746	0.054995	-0.00261	0.264913
15.8	0.022961	-0.02083	0.097766	0.149012	0,618667*	0.018185	0.061745	0.087964	0.49931	-0.0454	-0.00916	-0.0273	0.104458	-0.32569	-0.01318	0.008255	0.186775	-0.0294	0.094151	0.082045	0,358905*	-0.06141	-0.52861	-0.01192	0,931068*	0.032637	-0.0044	-0.67914	-0.05552	-0.02615	0.080074	-0.01671	2,55015*	-0.19057	0.105855	0.118036	0.096353	0.002152	-0.01199	-0.01041	0.002961	0.05284	-0.01579	0.296869
16	0.055916	-0.02409	0.080854	0.128405	0,543333*	0.012787	0.034848	0.060155	0.455959	-0.06818	-0.00352	-0.01973	0.092475	-0.33174	-0.01904	-0.00189	0.156397	-0.02917	0.097943	0.068714	0,305074*	0.011189	-0.55789	-0.03091	0,799323*	0.037054	-0.00854	-0.67384	-0.08147	-0.03588	0.067528	-0.02184	2,259055*	-0.16428	0.136129	0.086392	0.085073	-0.00719	-0.00755	-0.06462	0.0185	0.048431	0.001518	0.276934
16.2	0.009443	-0.0238	0.066948	0.106729	0,490169*	0.009442	0.001907	0.045919	0.435373	-0.1005	-0.01144	-0.0097	0.09849	-0.29497	0.007557	-0.0142	0.130753	-0.03108	0.116409	0.054176	0,251322*	-0.02942	-0.60275	-0.0305	0,679857*	0.020193	-0.01189	-0.67145	-0.10499	-0.04564	0.061616	-0.01383	2,2671*	-0.14289	0.120961	0.066279	0.076214	-0.00199	-0.01846	-0.11559	0.011085	0.048851	-0.00866	0.300963
16.4	-0.03579	-0.02293	0.041699	0.081612	0,397304*	-0.01096	0.026619	0.032029	0.473152	-0.10431	5.14e-05	-0.01133	0.101289	-0.22412	-0.00291	-0.02034	0.111335	-0.04525	0.138323	0.04288	0,196769*	-0.09791	-0.62642	-0.0404	0,595106*	0.01434	-0.01189	-0.67597	-0.10477	-0.04592	0.058796	-0.0226	2,180869*	-0.10275	0.149984	0.043907	0.065101	0.009829	-0.01944	-0.1364	0.005695	0.042204	-0.00565	0.197908
16.6	-0.06134	-0.02256	0.030105	0.041684	0,339019*	-0.03457	-0.00597	0.019388	0.453647	-0.09638	0.009534	-0.00715	0.077124	-0.16513	0.007444	-0.03905	0.115209	-0.02842	0.139957	0.032215	0,158219*	-0.07424	-0.64907	-0.03497	0,504548*	0.004692	-0.01305	-0.67082	-0.12294	-0.06234	0.040251	-0.03009	1,968734*	-0.10113	0.156383	0.020704	0.07298	-0.00603	-0.02279	-0.07682	-0.00275	0.04698	-0.00287	0.359649
16.8	-0.00993	-0.03366	0.031213	-0.00038	0,263305*	-0.04529	0.069249	0.015737	0.414732	-0.09126	0.019865	-0.00678	0.073534	-0.14563	0.022542	-0.0414	0.095897	-0.02649	0.142434	0.028176	0,143333*	-0.06252	-0.66851	-0.03961	0,427265*	-0.00344	-0.01152	-0.66825	-0.12826	-0.07203	0.024097	-0.0207	1,71757*	-0.07488	0.149573	0.005319	0.054876	-0.01452	-0.03361	-0.00223	0.001165	0.046827	0.017946	0.23435
17	-0.02073	-0.03659	0.031624	-0.03899	0,202004*	0.006488	0.027872	0.018471	0.382289	-0.0823	0.026823	-0.0157	0.062163	-0.15728	0.020205	-0.05274	0.083881	-0.04109	0.158683	0.021678	0,137589*	-0.11125	-0.67608	-0.04702	0,35651*	0.019852	-0.00914	-0.66641	-0.11492	-0.05299	0.013826	-0.03765	1,409232*	-0.04385	0.135159	-0.02104	0.027136	0.00511	-0.01633	0.005632	0.000377	0.041734	0.017474	0.177687
17.2	-0.03813	-0.04011	0.020074	-0.07345	0,183598*	0.00392	0.035885	0.024139	0.370092	-0.06431	0.026784	-0.02475	0.041812	-0.1265	0.013254	-0.05649	0.14372	-0.03666	0.15224	0.030385	0,193624*	-0.1123	-0.61889	-0.03641	0,303468*	0.026651	-0.00647	-0.65717	-0.09977	-0.07662	0.000957	-0.03514	1,146245*	-0.0087	0.161577	-0.03809	0.033499	0.045785	-0.02509	0.060495	-0.00233	0.042333	0.018659	0.283158
17.4	-0.06526	-0.03732	0.015641	-0.09906	0,147499*	-0.02895	0.030263	0.025403	0.416513	-0.05096	0.023217	-0.01913	0.014728	-0.12821	-0.01108	-0.05242	0.151404	-0.01683	0.126227	0.022744	0,326467*	-0.03171	-0.25051	-0.04603	0,275433*	0.013824	-0.0019	-0.65799	-0.08262	-0.08867	-0.00892	-0.03066	0,914526*	-0.00401	0.141992	-0.04787	0.029175	0.020498	-0.02119	0.123535	-0.02035	0.032221	0.06408	0.264984
17.6	-0.00828	-0.04922	0.011646	-0.12065	0,113996*	-0.02503	0.066745	0.031164	0.390944	-0.0427	0.0222	-0.00837	-0.02259	-0.12223	-0.02518	-0.0626	0.12718	-0.03727	0.132971	0.014812	0,237353*	-0.07489	-0.06301	-0.05314	0,239812*	0.003123	0.002698	-0.67372	-0.08913	-0.09591	-0.01759	-0.04818	0,649613*	0.011497	0.146403	-0.06371	0.027531	0.004463	-0.02616	0.12144	-0.01761	0.045714	0.04032	0.222377
17.8	0.027401	-0.04896	0.010187	-0.1278	0,078393*	0.025527	0.006926	0.02756	0.344431	-0.03836	0.007198	-0.00408	-0.03982	-0.10077	-0.01805	-0.07361	0.115841	-0.03651	0.142819	0.007734	0,184423*	-0.12578	-0.08498	-0.05169	0,176061*	-0.01042	0.007284	-0.67191	-0.10256	-0.11474	-0.00263	-0.0315	0,483851*	0.033389	0.127366	-0.07138	0.005161	0.006534	-0.04037	0.1214	-0.02128	0.032105	0.040939	0.25976
18	-0.00299	-0.03909	0.009148	-0.12485	0,03161*	-0.00704	-0.01699	0.036179	0.318128	-0.0356	0.006695	-0.00193	-0.06731	-0.11454	0.031599	-0.07605	0.104604	-0.01417	0.143802	0.000642	0,202236*	-0.13819	-0.17472	-0.09464	0,115302*	-0.01447	0.010988	-0.6752	-0.1102	-0.12258	0.056058	-0.01763	0,328336*	0.094921	0.092809	-0.07811	-0.01791	0.051089	-0.05533	0.143656	-0.00889	0.024009	0.006013	0.234767
18.2	-0.01584	-0.04435	0.01102	-0.11886	0,032843*	-0.02431	0.019661	0.058774	0.352898	-0.03822	-0.00054	-0.01495	-0.07196	-0.11905	0.003105	-0.07794	0.121418	-0.00338	0.135015	-0.0055	0,24561*	-0.1594	-0.17173	-0.10214	0,089089*	-0.01226	0.015923	-0.67865	-0.09061	-0.11536	0.045454	-0.02839	0,207464*	0.126137	0.054202	-0.07648	0.005073	0.033047	-0.03621	0.132554	-0.0198	0.017605	0.021766	0.228625
18.4	-0.00623	-0.04791	0.00414	-0.11142	0,02397*	-0.03489	0.021436	0.080823	0.402869	-0.03377	-0.00572	-0.01923	-0.08658	-0.12124	-0.01407	-0.08429	0.169672	-0.02013	0.122413	-0.0101	0,198621*	-0.1691	-0.04678	-0.10442	0,057454*	-0.01995	0.02046	-0.67596	-0.08857	-0.11176	0.02622	-0.02675	0,115307*	0.139895	0.008927	-0.08999	-0.0132	0.010133	-0.05484	0.138394	-0.02776	0.02756	0.02226	0.19667
18.6	-0.0112	-0.05625	-0.02691	-0.08633	0,012343*	0.04122	0.021285	0.09864	0.367007	-0.03734	-0.01568	-0.01637	-0.09721	-0.13571	0.001308	-0.07402	0.172506	-0.00892	0.113906	-0.02036	0,195528*	-0.15003	-0.097	-0.10026	-0,00065*	-0.02508	0.027096	-0.67601	-0.08998	-0.10034	0.012076	-0.0178	0,060207*	0.202259	-0.0494	-0.09628	-0.05346	-0.00599	-0.06144	0.136881	-0.01871	0.030973	0.032316	0.21651
18.8	-0.02703	-0.06339	-0.05111	-0.0688	-0,0078*	0.020461	-0.04691	0.118434	0.325742	-0.04368	-0.02083	-0.0185	-0.0937	-0.12486	0.003221	-0.07912	0.185629	-0.00527	0.105404	-0.02154	0,173614*	-0.18617	-0.17162	-0.07576	-0,03635*	-0.02274	0.032127	-0.67186	-0.08955	-0.10949	0.003438	-0.03338	-0,01471*	0.192578	-0.08543	-0.10205	-0.08762	-0.00261	-0.05378	0.148882	-0.01649	0.02234	0.029576	0.231149
19	0.006213	-0.06901	-0.08687	-0.05784	-0,01928*	-0.02925	-0.02993	0.136981	0.285286	-0.0492	-0.02254	-0.01214	-0.10945	-0.15085	-0.02279	-0.08696	0.205918	-0.00404	0.110725	-0.02606	0,14291*	-0.15444	-0.09331	-0.06024	-0,06323*	-0.0089	0.037814	-0.66897	-0.09322	-0.09867	0.005373	-0.04929	-0,06784*	0.145349	-0.11003	-0.10897	-0.11169	-0.03212	-0.06604	0.127258	-0.03014	0.033592	0.019502	0.150492
19.2	-0.01192	-0.06652	-0.12252	-0.05262	-0,03719*	0.013009	-0.00233	0.139835	0.241527	-0.05073	-0.02157	-0.01997	-0.11624	-0.15132	-0.03236	-0.07783	0.18515	0.00767	0.115391	-0.03504	0,102413*	-0.04387	-0.01716	-0.0733	-0,09569*	-0.00865	0.043838	-0.67073	-0.08932	-0.12272	0.055301	-0.04336	-0,06879*	0.116743	-0.14176	-0.10666	-0.14147	-0.03481	-0.05285	0.121018	-0.02504	0.022937	0.015834	0.189351
19.4	-0.02854	-0.0663	-0.15051	-0.05272	-0,0491*	0.014132	0.020018	0.145365	0.259131	-0.05831	-0.01555	-0.01667	-0.12692	-0.14627	0.001952	-0.08835	0.163319	0.01188	0.112108	-0.04192	0,121656*	-0.0993	-0.08287	-0.08225	-0,10749*	-0.02348	0.051212	-0.67445	-0.07504	-0.13111	0.092236	-0.03055	-0,07303*	0.099825	-0.20565	-0.11113	-0.16553	-0.04148	-0.04234	0.129136	-0.03908	0.024145	0.022028	0.236409
19.6	-0.0004	-0.07071	-0.19193	-0.05842	-0,0464*	-0.02425	-0.0365	0.148823	0.241258	-0.03646	-0.0219	-0.02493	-0.13281	-0.1421	-0.01795	-0.08983	0.199424	0.012939	0.116587	-0.04777	0,395258*	-0.04587	-0.11916	-0.08608	-0,11202*	-0.04544	0.055603	-0.68656	-0.07246	-0.12072	0.109338	-0.01501	-0,1106*	0.135651	-0.29994	-0.11015	-0.18902	-0.02529	-0.0532	0.124899	-0.02664	0.014057	-0.00567	0.219199
19.8	-0.02553	-0.08161	-0.22239	-0.05686	-0,05846*	-0.04745	-0.02402	0.163689	0.199028	-0.05147	-0.02203	-0.03228	-0.12487	-0.15627	-0.03174	-0.11655	0.184355	0.015097	0.122654	-0.05433	0,384469*	-0.00964	-0.04527	-0.09293	-0,12665*	-0.07099	0.064346	-0.69465	-0.07695	-0.13056	0.125827	-0.02877	-0,10196*	0.167935	-0.33165	-0.10955	-0.21447	-0.02782	-0.0435	0.142156	-0.04224	0.019832	-1.7e-05	0.159811
20	-0.05359	-0.08379	-0.25597	-0.04384	-0,07681*	-0.06649	-0.03184	0.180563	0.178856	-0.0535	-0.01366	-0.03821	-0.13877	-0.16656	-0.02126	-0.12646	0.154127	0.026035	0.114656	-0.05669	0,325388*	-0.0796	-0.10275	-0.09498	-0,09851*	-0.09732	0.071869	-0.69735	-0.10018	-0.13139	0.132923	-0.02793	-0,09217*	0.20479	-0.36604	-0.10945	-0.23037	-0.02024	-0.05412	0.140546	-0.03289	-0.00287	-0.00376	0.182531
Mean signal sizes during stimulation
wild type	flwr-1
0.0946228	-0.0538322
-0.0364544	0.0179734
0.169943	0.220253
0.157997	0.108018
	0.0813626
0.122003	0.0481176
-0.29584	0.0451206
0.513068	-0.0870914
0.558506	0.077218
0.0441173	0.0713654
0.0663213	0.132317
-0.0429793	0.543502
0.105528	0.149845
-0.148816	0.0433331
0.0526812	0.110747
0.0383743	0.238559
0.417486	0.598253
-0.160855	0.292763
0.159426	0.00012605
0.186133	0.19734
	0.314343
0.00893585	0.0778228
0.043007	0.304061
0.0776641	0.342521
	0.196665
0.0291702	-0.0523963
0.164427	0.800786
-0.346005	0.072964
0.121097	-0.180384
0.0380193	0.389064
0.0782614	0.277387
-0.0384178	0.139649
-0.061103	0.127517
0.0194898	0.156941
0.180004	0.0922476
0.0548558	0.176874
0.0633158	0.0793586
-0.0456661	0.359828
-0.250725	0.239034
0.0883749
-0.126601	0.288302
-0.0109529	0.238617
0.292761

## Sheet: Fig4C+D
Time (s)	unc-29
0.033	0.986536	0.994805	0.998226	0.988182	0.997578	1.00841	0.9966	1.00917	1.05468	0.983965		1.00575	1.00413	0.996746	1.01052	0.984011	0.985234	1.00153	0.997576	1.00847	0.990588	1.00545	1.00479	1.01826	1.0063		0.977497	0.993492	1.00272	1.00761	0.982587	1.00952	0.993799	0.991811	0.991318	0.977887	1.02395	0.99374		0.990071	1.00253	1.01212	1.00334	0.98403	0.994858	1.01465	1.01281	0.992177	0.981633
0.067	0.992964	0.997642	0.997593	1.00253	1.00215	1.00384	1.00254	1.00267	1.03577	1.02418		1.00985	1.00238	0.999442	1.00214	0.990488	1	1.00491	1.00234	0.993775	0.993468	1.01135	1.00633	1.01678	1.00457		0.985041	0.987847	0.999803	0.9938	0.99091	1.02673	1.00325	0.97636	0.991478	0.994853	1.02241	0.997094		0.99454	0.983586	0.99801	1.00157	0.989302	1.0019	1.00302	1.03207	0.987522	0.978473
0.1	1.01354	0.995902	0.999755	1.01298	1.00018	1.0053	1.00867	0.987615	1.05943	1.00164		1.01624	0.999112	1.00269	0.996052	1.01299	0.997263	0.99815	0.996589	0.987934	1.0033	1.00521	1.01334	1.01926	1.00285		0.984024	1.00073	0.996428	1.0095	0.99074	1.03184	1.00064	0.997176	0.997459	1.01697	1.01928	0.994675		0.992621	1.00639	0.976039	0.994573	0.999472	1.00579	1.01259	1.00629	1.00262	0.978306
0.133	1.01179	1.00165	1.01082	1.01361	1.02119	1.00841	1.00106	1.00719	1.05131	1.01155		1.0078	0.993539	0.989681	1.00633	1.00122	1.00017	1.02361	0.991825	0.993007	1.00737	1.00169	1.0106	1.02113	0.993168		0.983602	0.991089	0.999867	1.01366	0.995347	1.01439	0.995262	0.999676	1.00383	1.03212	1.02531	0.997708		0.999737	0.992293	1.00379	1.00504	0.986369	1.00894	0.993119	1.00548	1.00318	0.985532
0.167	1.00555	0.997454	1.01019	1.00333	1.00557	1.0028	1.01182	0.998077	1.04893	1.00449		1.00907	0.992583	0.993888	0.997557	1.00675	1.00017	1.01883	0.995194	0.99892	0.994908	0.994984	1.01043	1.01234	0.984272		0.986655		1.00907	0.995456	0.994357	1.0164	0.99488	0.999158	1.00926	1.04268	1.03094	1.00129		0.98375	0.993919	0.998778	1.0093	0.996539	1.00854	0.989711	1.00075	1.00102	0.988693
0.2	1.00445	1.01179	1.0002	1.00289	0.993712	1.01884	1.0028	0.975885	1.06448	0.986354		0.997729	0.995288	1.00904	0.987837	0.999322	0.99783	1.01306	1.00431	1.00322	1.00593	1.00914	1.00262	0.999368	0.996623		0.983181	0.996734	1.00346	0.993181	0.997565	1.01296	1.0021	0.990624	1.00103	1.0329	1.03674	1.00145		1.00269	0.989453	0.986674	0.997638	0.990362	1.01032	1.01282		1.00222	0.981062
0.233	1.00179	1.01463	1.01839	0.986678	0.990216	1.00652	0.991346	0.991314	1.06062	0.996711		1.0043	1.00063	0.996583	1.00387	0.994905	1.00913	1.00985	1.00333	0.998746	0.997962	1.01128	0.997381	1.0292	0.986391		0.989112	0.989436	1.02799	0.99757	0.997155	1.02875	1.00564	0.986875	1.00476	1.01742	1.03111	0.994127		0.988617	0.984445	0.985814	1.00327	0.991641	0.986274	1.00767	0.996832	0.974123	0.984961
0.267	0.996462	1.00559	1.00974	1.00891	1.00583	1.01109	0.998446	0.983468	1.07567	0.97573		1.002	0.997364	0.996188	1.00119	0.993794	1.00485	1.01043	0.989852	1.00627	0.990414	0.998268	1.00205	1.01739	1.00709		0.997325	0.997793	1.01917	0.996237	0.985285	1.01254	1.00933	1.00425	0.999324	1.02024	1.02508	0.998416		0.991263	0.997301	0.999386	1.00134	0.986899	0.984899	1.01226	0.989738	0.982468	0.983012
0.3	1.00243	0.991059	1.0245	0.989246	0.992634	1.01255	0.990551	0.981936	1.03031	0.999178		1.00218	0.994331	0.989913	1.00063	1.00406	0.993152	1.00886	0.982945	0.999934	0.99245	1.00457	1.00866	1.02299	0.997406		0.996729	1.0078	0.999495	0.988859	1.01107	1.03059	1.00411	1.00675	0.992411	1.02141	1.03031	0.989932		0.987027	0.991369	1.00031	1.00384	0.98509	0.987816	1.00253	0.994635	0.990015
0.333	0.989577	0.97827	0.996065	0.996069	0.987614	0.994195	1.00254	0.996545	1.03983	1.01466		0.992534	1.01161	0.990865	1.01225	0.998929	0.997028	1.00153	1.00299	0.998325	0.990414	1.00392	0.990772	1.02338	0.993788		0.99529	1.00163	1.00997	0.993571	0.99204	0.999777	1.00372	0.992543	0.999711	1.03533	1.03514	1.00083		0.994705	0.986136	1.0044	0.995871	0.98615	0.989191	1.01052	0.998791	0.983033	0.986743
0.367	0.995359	0.986859	1.00344	1.00102	0.982854	1.00566	1.00113	1.00503	1.04032	1.01045		0.989637	1.00683	0.996814	1.00633	0.996639	1.00324	1.00846	0.991487	1.00483	0.994908	1.02151	1.00085	1.01475	1.00457		0.995886	1.00908	1.00166	0.999617	0.993199	0.991465	1.01725	0.999827	0.994276	1.01234	1.02951	1.00083		0.985669	0.99491	1.00085	0.99877	0.979598	0.997206	1.00538	0.991697	0.993706	0.996726
0.4	0.992697	1.00669	1.0128	0.998895	0.979805	1.00876	1.01059	1.00114	1.02884	1.0142		0.991085	0.998224	0.99872	0.999454	1.00485	1.01277	0.987194	0.993291	1.00322	0.999649	1.01676	0.99521	1.00783	0.99773		0.972583	1.0151	1.00615	0.984241	1.00135	1.0012	0.99981	0.993427	1.00569	1.01649	1.03434	0.996706		0.988549	1.01016	1.00271	1.004	0.99557	1.00797	1.02049	0.993082	1.00238	0.989904
0.433	1.00316	0.994539	1.01082	0.993136	0.973336	1.00919	1.00218	0.999423	1.04221	1.01045		0.990661	0.984769	1.00388	1.00459	1.00122	1.00284	0.993131	0.997237	0.99892	1.00864	1.01202	1.00472	1.00333	1.00151		0.984024	0.998606	1.00653	0.993504	1.00811	0.977103	1.00834	0.995194	0.999711	1.00852	1.01688	1.00006		0.990866	0.990444	1.00031		0.981937	1.007	1.01797	0.99977	0.987454	0.98439
0.467	0.996084	0.990793	1.01317	0.995263	0.982408	1.00394	1.02284	1.00465	1.01875	1.0076		0.994159	0.988826	1.00181	0.998506	1.00462	1.0009	1.0017	1.00496	1.00459	1.00355	1.00711	0.991671	1.01289	1.01213		0.99936	0.985884	1.00256	0.98824	1.01387	1.00649	1.0048	0.999613	0.992797	1.0104	1.02444	0.998189		0.989673	1.00477	1.0074	1.0106	0.982687	1.01793	1.00902	0.994467	0.994436	0.985769
0.5	1.00609	1.00422	0.997964	1.00359	0.974599	0.991089	1.00516	1.00727	1.04865	1.01887		0.994583	0.98731	1.01173	0.992189	0.993794	1.00461	1.01043	1.00455	0.988702	1.00787	1.01497	0.996911	1.01305	1.01308		0.984271	0.995145	1.01303	0.981966	0.998385	1.00851	1.00888	1.0108	0.987748	1.00078	1.01961	0.992738		0.994075	1.00046	1.00255	1.00923	0.978694	1.00408		0.988758	0.990346	0.983012
0.533	1.00765	0.998019	0.991927	0.992254	0.96813	1.00152	1.00621	1.00682	1.0333	1.00494		0.977519	0.982692	1.00197	0.99448	0.990393	1.01009	1.01265	0.99938	0.99521	1.00787	1.00369	0.990869	1.01733	1.00985		0.989184	0.980614	1.0152	0.984793	1.0138	0.998769	1.01279	1.0094	0.994662	1.00289	1.02114	0.992738		0.98944	0.986295	0.999928	0.99387	0.99557	1.00878	1.00348	0.996426	0.984727	0.992995
0.567	1.00765	0.998473	1.00777	1.00528	1.00126	1.00591	1.00428	1.00988	1.03499	1.0076		0.987412	0.982528	1.00253	0.989505	0.994024	1.00719	1.01289	1.01564	0.99521	1.01626	1.00704	0.992238	1.0087	1.02504		0.995958	1.00388	1.01483	0.981966	0.998964	1.00322	1.00926	1.00211	0.995048		1.01785	0.992965		0.992155	0.98722	0.998619	0.988238	0.98562	0.997275	1.01036	0.998959	0.988983	0.978306
0.6	1.007	0.99711	1.00236	0.986237	0.990663	1.00134		0.999872	1.01559	1.01136			1.00188	1.01094	1.00145	1.00809	0.998232	1.01627	1.00891	0.988282	1.00685	1.00507	1.00706		1.0093		0.98757	1.00952	1.01198	0.992171	0.994188	0.982562	1.00426	1.003	0.996527	1.00648	1.01921	0.974579		0.982722	0.993853	1.00603	1.00087	0.998503	1.01776	1.01669	1.00565	0.980306	0.987147
0.633	1.00837	1.00861	1.00587	0.987741	0.988507	0.999697	0.992472	0.998603	1.02965	1.01181		0.988261	1.00611	1.00444	0.988881	1.00011	0.992418	1.01709	1.00792	0.969355	1.02033	0.99796	0.998114	1.00233	1.02299		0.993676	1.00388	1.01108	0.986288	1.00944	0.978529	0.998505	1.00425	0.996527		1.01222	0.98603		0.986561	0.984379	1.00679	0.99797	0.996849	1.01267	1.00276	0.996189	0.978777	1.00103
0.667	1.00636	1.00661	0.996065	0.988805	0.992449	1.00323	1.00236	0.999051	1.02519	1.01382		0.979816	1.0038	0.999442	1.00927	0.991341	0.997263	1.01627	1.01745	0.967746	0.998456	1.00728	1.00125	1.00178	1.01331		1.00122	1.01638	1.01976	0.991781	1.0007	0.985242	0.99981	0.989312	0.994276	1.00781	1.00039	0.985322		0.991593	0.994461	1.0051	0.992338	1.00483	0.996636	1.01328	1.00507	0.969867	0.989333
0.7	1.00636	0.998661	1.00408	0.99306	1.00197	1.00141	1.00682	1.00447	1.02399	1.00878		0.976743	1.02315	0.997536	0.993233	0.993794	1.00412	1.01825	0.996998	0.991746	1.01541	1.00253	1.011	1.00629	1.03534		0.976479	1.00042	1.00024		0.989412	0.996997	1.00426	1.01168	1.00087	1.00859	1.00328	0.987192		1.01109	1.0084	1.01142	0.996603	0.978319	1.01226	1.01787	0.997168	0.986792	0.996559
0.733	0.986615	0.98943	1.00083	0.968518	0.993342	1.00641	1.01189	1.00735	1.02707	0.975164		0.996881	1.00284	1.0023	1.0005	1.00344	0.997498	1.01586	0.999958	0.972818	1.00948	1.01832	0.99698	1.01134	1.01787		0.994447	1.01021	1.006	0.991391	1.00094	0.98952	0.99351	1.00653	1.0001	1.03556	1.01005	0.980484		1.01437	0.990378	1.01343	1.00144	1.00009	1.007		0.983386	0.995702	0.988929
0.767	1.00388	0.992721	0.996065	0.990933	0.993342	1.00934	1.00849	0.992923	1.04003	0.992388		0.990134	1.01145	1.01571	0.99631	1.0107	1.01364	1.026	0.999958	0.998674	0.994733	1.00352	0.998348	1.01266	1.0211		1.00792	1.00547	1.00473	0.989506	0.998554	1.0043	0.998505	1.00123	1.00196	1.01555	1.01028	0.980097		1.00781	0.996152	1.00025	0.994836	0.993541	1.01988	1.00568	0.997336	1.0071	0.987787
0.8	0.996997	0.983678	1.01433	0.980918	0.998102	1.01159	1.01059	0.984442	1.02756	1.02198		0.97547	0.995848	1.00237	0.988258	1.00194	0.99927	1.02921	1.00037	0.990557	1.006	1.00294	0.989237	1.01343	0.99773		1.00259	0.989656	1.02477	0.987069	0.997395	0.998423			1.0074	1.00726	0.997489	0.980872		1.00199	0.992228	1.00989	1.0119	0.991732	1.01461	1.01217	1.0019	1.02027	0.991115
0.833	0.99829	0.98606	1.00479	0.982863	0.98598	1.0077	1.02827	1.00555	1.01756	1.02619		1.0061	1.00891	1.00483	1.002	0.99435	0.987974	1.02962		0.999514	1.00787		0.994878	1.01903	1.00646		0.997674	0.997199	1.00473	0.983851	0.989242	0.975086	0.991282	1.00226	1.00158	1.02102	1.01028	0.990292		1.00278	0.990219	1.00025	1.01303	0.992637	1.00797	1.01446	0.996594	1.00132	0.992493
0.867	0.990759	1.0068	1.02152	0.992072	0.992896	1.00709	1.00823	1.00447	1.03162	0.987077		1.00363	0.998156	0.997372	0.985018	0.996639	1.00548	1.01931	1.00932	0.989963	1.0144	1.0004	0.991007	1.01025	0.993559		1.00175	1.00293	0.991192	0.986907	0.981088	1.00934	0.991823	1.01293	1.02238	1.00968	0.997489	0.979776		1.00973	1.00454	1.00248	1.0148	0.993541	1.01518	1.01233	0.996021	1.00059	0.990948
0.9	0.995627	1.00524	1.01783	0.989139	0.997655	1.01123	1.01559	1.00862	1.04003	1.00696		0.996208	0.995055	1.01998	0.987539	0.995854	1.00137	1.01815	1.01194	0.997905	0.988203	1.00491	0.998583	1.02315	0.997892		1.01792	0.98781	1.0051	0.997893	0.985864	0.979955	1.00334	1.00476	1.00663	1.01422	1.01415	0.976195		1.00013	0.994302	1.00264	1.00876	0.99588	1.01867	1.01731	0.999365	1.00814	0.985838
0.933	0.991862	0.994195	1.01433	0.990385	1.01238	1.00959	1.01008	1.00862	1.03589	0.984421		0.995783	0.996968	1.00887	1.00603	0.996409	0.997332	1.0202	1.00799		1.00295	0.997623	0.986735	1.00986	0.989226		0.996831	1.00106		0.989411	0.996576	0.991883	0.98406	1.00866	1.00531	1.00609	1.01841	1.00003		1.00109	0.994685	1.00187	0.995734	0.98805	1.02514	1.00355	1.00156	1.01785	0.98251
0.967	0.998936	1.00021	1.00587	0.999594	0.989846	1.01166	1.0099	1.00167	1.02568	1.0043		1.0108	0.993867	1.01689	0.99307	0.97809	0.984832	1.02573	1.01694	1.01032	1.01032	1.01145	0.995113	1.01359	0.995125		1.00013	0.99813	0.977129	0.996075	0.992789	0.998178	1.00188	1.00226	1.00026	1.00382				1.01036	1.00508	1.01066	1.00796	0.986615	1.01049	1.01921	0.996426	1.00043	0.98698
1	0.999392	0.994915	1.00669	1.00473	0.984456	1.00545	1.00247	1.00779	1.02022	0.997244		0.982217	0.999837	1.0092	0.988326	0.979757	0.994591	1.01979	1.00051	1.0034	0.991329	1.01971	1.00092	1.0059	1.00976			0.987435	0.988343	0.994581	1.0035	0.979955	0.995961	0.998515	1.00135	0.986631	1.01375	1.00097		1.01284	1.00508	1.01158	1.01126	0.985336	1.02028	1.02436	1.00882	1.01745	0.988191
1.033	0.985623	1.00551	1.01865	1.01093	0.990108	1.00813	1.00544	1.00238	1.02617	1.00806		0.987836	1.00023	1.02737	0.990061	0.993496	0.993387	1.03034	0.990401	1.00424	0.981498	1.013	0.99391	1.01639	0.999525		0.988865	1.01176	1.00659	1.00518	0.999134	0.996334	0.994498	1.00507	1.00112	0.974587	0.999187	0.997		1.00805	1.00362	1.01082	1.0066	0.98699	0.998414	1.02095	1.00156	1.01279	0.992493
1.067	0.991137	1.00158	0.990214	1.00943	1.00781	0.999844	1.00457	0.990013	1.04221	0.984232		1.00592	0.99578	1.00572	1.01827	0.962779	0.993387	1.0202	0.986045	1.00627	1.006	0.999181	0.993675	1.02238	0.997635		0.990304	0.994513	0.989832	1.00463	0.993948	0.980546	1.00564	1.00403	0.997007	0.985531	1.00482	1.01016		0.993416	1.00231	1.00465	0.997667	0.990608	1.02521	1.01604		1.00757	0.99209
1.1	1.00224	1.00706	1.00993	0.995962	0.991818	1.00442	1.01935	1.01104	1.03121	1.00411		0.986988	0.997924	1.00072	0.993693	0.986397	0.991214	1.00447	0.945213	1.00399	0.997859	1.00491	0.995611	0.992769	0.985675		0.983355	0.981325	1.00427	1.00729	1.00565	0.975676		0.98858	0.995688	0.997025	1.01841	0.998483		1.01093	0.998768	0.997019	1.0033	0.986241	1.00351	1.03495	1.00018	1.0091	0.994039
1.133	0.985355	1.00176	1.00948	1.00003	0.993158	1.00338	1.00037	1.02195	1.02281	0.986243		1.00055	1.00175	1.00072	1.00325	0.981884	1.00227		0.993361	1.00889	1.00888	1.00392	0.994477	0.994636			1.01649	0.999848	0.992372	1.01129	0.995107	0.97971	0.992271	1.00184	0.997713	1.00062	1.00482	1.01032		0.989741	0.998768	1.00481	0.993967	1.0053	1.00998	1.01754	0.988185	0.987591	0.990711
1.167	0.990034	1.00926	1.00967	1.00385	0.989846	1.01295	1.00483	1.00436	1.03162	1.01694		1.00013	0.993307	1.00302	1.0023	0.980936	0.995892	1.00266	0.994756	1.01295	0.990064	1.0067	0.994076	0.995182	1.00637			1.01422	1.01362	1.01035	0.99033	0.977276	0.997872	0.99955	0.994529		0.985426	1.00316		0.999805	0.992835	0.995868	0.990268	0.997844	1.00586	1.01089	1.01257	1.00983	0.99209
1.2	0.995359	0.99537	1.00706	0.997466	0.995052	1.00363	1.02258	1.01699	1.01895	1.00146		0.990237	0.984633	0.995957	1.01392	0.988361	1.00154	1.00225	1.0001	1.00805	0.997612	1.00809	0.992141	0.997596	0.998189		1.00954	1.00873	1.00083	1.00713	1.00442	0.994908	0.99434	1.01656	0.998486	0.991714	0.996523	1.00674		1.00868	0.997843	1.00072	0.97957	0.992947	1.00828	1.02308	0.998217	0.999159	1.00385
1.233	0.982046	1.00176	0.988871	1.00535	0.9894	1.01131	1.00928	1.0094	1.01994	1.01914		0.996632	0.977147	1.00309	1.00917	0.987643	0.999367	1.01668	1.00741	0.99521	1.00312	1.02307	0.994643	1.01881	0.997635		1.00115	1.01235	0.999558	1.00108	0.997665	0.989031	0.993575	1.01214	1.00206	1.00382	1.00778	1.00222		0.982063	1.00601	0.994783	0.984235	1.00365	1.01508	1.02482	0.998217	0.993375	1.00231
1.267	0.991594	1.00596	0.995432	0.996144	0.975754	1.00734	1.01269	1.01329	1.01559	1.02619		1.0119	1.00366	1.0119	1.00577	0.996016	0.991615	1.00259	1.00898	0.999688	0.996347	0.996065	0.994477	0.993316	1.0007		1.01403	1.00926	1.00749	1.01129	0.987123	0.991048	0.989503	1.01656	0.994209	1.02118	1.00312	0.996773		0.994773	1.01032	0.981212	0.993733	1.00545	0.977189	1.01968	1.00686	0.98872	1.00174
1.3	0.988285	0.993818	0.995432	0.992072	0.999996	1.00174	1.01523	1.02547	1.04024	0.993488		1.02119	0.989414	0.993166	1.00404	1.0107	0.999602	1.00416	1.01292	1.00053	1.01187	1.00277	0.993509	0.989036	0.980951		1.00954	1.02108	1.00733	1.01051	1.00623	1.00037	0.979289	1.00964	1.00563	1.00781	1.01108	0.993967		0.992291	1.00285	0.981595	0.982068	0.999279	0.997747	1.02292	1.00254	1.00518	1.01465
1.333	0.982314	1.00176	1.0011	0.991631	0.985272	1.00941		1.0335	1.02785	0.983321		1.02112	0.989414	0.997767	1.00499	1.00423	0.998398	0.995591	1.00619	1.01295	1.00491	1.00335	1.00286	1.00667	0.971272		1.01462	1.00745	0.994695	1.01412	0.996845	1.00708	0.981674	1.00897	1.01183	1.01046	1.00875	1.00487			0.999693	0.978817	0.985768	1.00184	0.984065	1.01184	0.99977	1.00341	1.00036
1.367	0.991862	0.98943	0.986786	0.999336	1.00063	1.01563	1.0112	1.02394	1.01637	0.989732		1.03143	0.997296	1.00848	1.00816	1.00612	0.99646	1.00211	1.01949	0.995036	0.996347	0.985189	0.99568	0.994862	0.977724		1.00378	0.999473	1.02828	1.02432	0.993298	0.999777	0.987592	1.01412	0.994822	1.00538	1.01165	1.00597		0.99901	0.991144	0.995008	0.986334	1.00583	0.990135	1.02443	1.01274	1.00478	0.999956
1.4	1.00251	0.99957	0.984625	0.997208	1.00107	1.01502	1.02537	1.0289	1.05221	0.986621		1.03306	1.00709	1.01975	1.00096	1.00825	0.99001	0.99716	1.01629	0.999934	0.986516	1.01358	0.995915	1.00931	0.991574		1.00641	1.0015	1.0122	1.01428	0.988931	1.01439	0.984982	1.00205	1.01113	1.02008	1.02421	1.00581		1.01172	1.01156	0.997945	0.9865	0.993102	1.00422	1.01509	1.0169	1.01465	0.99078
1.433	0.991862	0.971155	0.994166	1.0019	1.01059	1.00484	1.01907	1.01628	1.02547	0.972697		1.00917	0.986546	0.99793	1.01961	1.00083	0.988874	0.991732	1.01966	1.00196	1.00347	0.987968	0.990675	1.01398	0.964037		1.00167	1.00534	1.01257	1.01883	0.994287	1.00607	0.979605	1.00367	1.0147	1.00515	1.00658	1.00277		1.01612	1.00078	0.987151	0.989799	0.995131	0.983495	1.0124	1.00018	1.00671	0.991351
1.467	0.985244	0.979555	0.981121	0.999336	1.00018	1.01631	1.01356	1.00301	1.01091	0.969586		1.01532	1.01075	0.992377	1.01084	1.0111	0.996059	1.00532	1.00364	1.00788	1.00695	1.00196	0.99785	0.992223	0.995516		0.998794	1.00902	1.00808	1.00423	1.00244	0.995744	0.986446	1.00455	1.0029	1.0104	1.01085	0.999191		1.01516	1.00231	0.998328	0.990365	1.02187	1.01297	1.0162	1.00335	1.00574	1.01091
1.5	0.981022	0.975621	0.994351	1.00209	1.00431	1.01156	1.00113	1.01493	1.03905	0.965374		1.01822	1.00597	0.983011	1.00034	1.00027	1.00154	0.983815	1.01514	0.999934	1.00635	0.989357	0.991809	0.997662	1.01109		1.00125	0.99614	1.01997	1.01561	1.00442	1.01825	0.967704	1.0083	0.993889	1.0057	1.00152	1.01025		1.0194	0.996376	0.997786	0.988998	0.995505	0.988357	1.02134	1.01615	0.98985	0.991755
1.533	0.996541	0.994539	0.979592	1.00014	1.01751	1.00285	1.00577	1.00167	1.02449	0.991666		1.00423	1.00867	1.00848	1.0095	1.0092	0.993387	0.989413	1.01908	0.996891	1.00025	1.00294	0.988172	0.984143	1.01227		0.995916	1.00615	1.01564	1.00596	1.00664	1.0012	0.981226	0.99623	1.00663	0.984431	1.00402	0.991255		1.01844	1.00786	0.992389	0.986265	1.00929	1.00043	1.01177	1.01443	0.974357	0.979015
1.567	1.00343	1.00842	0.969156	1.00465	1.00799	1.0031	1.01399	1.02405	1.0331	0.996522		1.00338	1.00676	1.02189	1.01408	0.998767	1.00194	0.99716	1.00898	1.00382	1.00516	0.987729	1.00002	1.00513	1.01944		0.985071	1.00472	1.00802	1.01051	0.985384	1.01237	0.984218	1.02588	1.01765	1.0024	0.999187	0.983545		1.01284	0.993602	1.01027	0.982966	0.99747	0.996706	1.01328	1.01541	0.982303	0.971956
1.6	1.00031	0.993253	0.975902	0.995886	1.02729	1.01199	1.01671	1.01231	1.01497	1.00092		1.00133	1.01639	1.00007	1.00397	0.999322	1.01461	1.00788	1.00915	0.998746	1.0066	0.99542	1.01364	1.00326	1.02683		0.991177	1.00269	1.01183	1.00368	0.999883	1.00531	0.986828	1.00705	1.00997	0.994664	1.00732	1.01135		1.01572	0.986361	0.999095	0.980233	0.992947	1.00002	1.0318	1.0221	0.993141	0.976258
1.633	0.988096	0.99609	0.976983	1.00146	1.01732	0.99517	1.01418	1.00888	1.01042	0.999822		1.0079	1.01408	1.00411	1.0114	1.00351	0.992653	1.0031	0.997237	1.00669	1.0066	0.993624	1.01808	0.997275	1.00425		0.994898	0.992898	1.00532	1.00086	1.00705	1.00875	0.986669	1.01485	1.01261	1.00146	1.01005	0.998416		1.02132	0.981512	1.00025	0.979833	1.00221	1.00724	1.01748	1.00383	0.977648	0.997367
1.667	0.994067	0.999194	1.00236	1.00279	1.01212	0.999311	1.01164	1.01953	1.0338	0.995877		1.01097	1.00986	0.996256	1.01598	0.993631	0.986036	0.992792	1.002	0.997731	0.996173	0.989456	0.995514	1.01134	1.01204		0.984054	1.00088	1.00405	0.99897	0.984395	1.03226	0.994656	1.01896	0.998712	1.00787	1.01005	1.00293		1.01572	1.00601	0.996159	0.9775	1.00711	1.0121	1.01289	1.0119	0.988886	0.986005
1.7	0.998936	0.995902	0.997146	1.00367	0.996239	0.995599	1.0091	1.01717	1.0438	0.995044		1.01285	1.00604	0.96428	1.00508	0.983523	0.99927	1.02204	0.989513	1.00627	1.00211	0.990438	0.990039	0.993929	1.01716		0.997951	0.987628	1.02028	0.999751	0.993128	1.01564	0.999493	1.01875	1.01035	1.00726	1.00925			1.01301	0.987669	1.00117	0.978066	1.00402	1.00546	1.02072	1.01345	0.979011	0.998341
1.733	0.990302	0.989053	0.989952	1.01519	0.993004	0.985422	1.00613	1.02042	1.03548	0.993944		0.991013	1.01527	0.970161	1.01614	1.00959	0.998868	1.00194	1.00578	1.00686	1.00516	0.985695	1.00366	0.989969	1.00826		0.994898	0.999446	1.0131	0.997085	1.00664	1.00917	1.00993	0.989615	0.999324	1.00897	1.01471	1.00403		1.02635	0.998068	0.999703	0.975567	1.00967	1.00076	1.01518	0.995754	0.990414	0.999316
1.767	0.996273	1.00404	0.993903	1.00579	0.996054	0.986029	1.01671	1.00716	1.03954	0.958129		0.989564	1.00835	1.00365	1.00793	0.989377	0.997733	1.01033	0.995842	1.01337	0.995751	0.98627	1.0134	1.01382	0.999916		0.987353	0.996734	1.02357	0.990259	1.00145	1.01606	1.00385		1.00267	0.988253	1.01375	0.994609		1.02019	1.00831	1.00679	0.978466	1.00876	1.00449	1.01708	1.02977	0.982867	0.989166
1.8	0.999849	0.995636	0.994984	1.0088	0.989323	0.9881	1.00805	1.00978	1.0333	0.999256		0.99776	0.953009	0.974367	1.00256	1.01813	0.992487	1.00177	1.00241	1.00315	1.00695	0.98627	1.01123	1.01865	1.01999		1.00455	0.999291	1.01526	1.00862		1.00044	1.02091	1.00382	1.00453	0.998647	1.01375	1.00909		1.02811	0.995676	1.00171	0.984098	1.00552	0.998817	1.02072	1.03132	0.991378	0.987787
1.833	0.99829	0.995636	0.997146	1.00756	0.979543	0.990599	0.998776	1.01672	1.0135	0.968108		0.979422	0.984865	0.974598	1.00217	1.00367	1.00669	1.00672	1.01153	1.00298	0.996522	0.991996	1.0089	0.979477	1.0037		1.01683	1.00802	1.01437	1.00235	0.994697	1.00548	1.00793	1.01656	0.998392	1.00693	1.02388	0.987995		1.01731	1.00123	0.989293	0.993996	1.00898	1.00173	1.03963	1.00261	0.992177	0.989333
1.867	0.99829	1.00203	0.994351	1.01163	0.976756	1.00035	0.995188	1.02674	1.00845	0.994855		0.958011	0.976259	0.98508	0.995687	1.00462	0.999103	1.01586	1.00578	1.01438	0.985673	0.97858	1.02292	1.00629	1.01227		1.00946	1.00727	1.01833	1.0018	0.996675	1.00792	1.01315	0.97535	0.990159	1.00952	1.01318	1.00006		1.01364	0.99561	0.985748	0.988598	0.989923	1.00311	1.01557	1.01362	0.997231	0.996392
1.9	1.00472	1.00596	0.998041	1.01137	0.979097	1.00078	0.993703	1.01717	1.01756	1.00722		0.973875	0.998716	0.973087	0.98636	1.00154	0.992487	1.01784	1.00159	1.0083	1.00856	0.978004	1.02155	0.989809	1.00353		1.00768	0.998981	1.0223	0.98587	0.989921	1.01178	1.007	0.994703	0.992251	1.00991	1.00988	0.994609		1.01788	1.00378	0.993923	1.00573	0.993761	0.999554		1.01028	0.982867	0.985434
1.933	1.00141	0.995824	0.992637	1.00862	0.987167	0.991028	0.981455	1.00933	1.01497	0.967008		0.985217	0.994099	0.993561	0.997815	0.996802	0.996363	1.02163	1.00316	1.01337	0.983462	0.991659	1.02872	1.00349	1.00464		1.01497	0.989875	1.01759	1.00407	1.00104	1.00809	1.01315	1.00412	0.997459	0.992947	1.02444	0.980351		1.01804	1.01009	0.995167	1.0042	0.990828	0.98651	1.01367	1.0044	1.00165	0.985267
1.967	1.00335	0.988787	0.998674	1.01607	1.00683	0.986029	0.979534	1.01131	1.0023	0.991555		0.991964	0.997924	0.983079	0.998601	1.00194	0.992819	1.02559	0.988865	1.00424	0.98957	1.00982	1.01591	0.994862	0.992681		1.00227	0.997328	1.01901	0.994581	0.984155	1.01825	1.02775	0.993667	1.00328	1.00272	1.01351	0.995383		1.01228	1.00709	0.997178	1.0013	0.982093	0.992344	1.02341	1.00048	0.988652	1.00621
2	1.00179	0.978114	0.991109	1.00579	1.02784	0.981029	0.99747	1.00238	0.993485	0.95574		0.995286	1.00063	0.986496	0.991172	0.996247	0.97708	1.0105	0.995602	0.99647	0.997293	0.978818	1.02018	1.00404	1.00047		1.01827	0.988067	1.01505	1.00463	0.99132	1.00246	1.01146	0.989981	0.998938	1.00859	1.01841	0.986738		1.01149	1.0047	1.00366	1.0128	0.990828	1.00562	1.01423	1.01264	0.983598	0.988998
2.033	1.00243	0.975543	1.00128	1.01882	1.02048	0.989313	0.998086	1.01015	1.00349	0.986055		1.00783	0.991231	0.999346	0.996703	0.98954	0.996695	1.00795	1.01064	0.986079	0.970401	0.979632	1.0126	1.00458	0.98411		1.00252	0.995894	1.01938	0.998741	0.993468	1.02412	1.01445	0.979983	0.995594	1.01406	1.02114	0.992577		1.01228	1.00878	1.00142	1.01416	1.015	1.0023	1.01328	0.99241	0.991378	0.996392
2.067	1.00555	0.967064	1.00307	1.01111	1.02524	0.985349	1.00465	1.0023	1.02785	0.974331		0.987018	1.00525	0.98896	1.00665	0.993008	0.996128	1.01272	0.995941	1.00746	0.987956	0.987729	1.01067	0.994089	0.994733		1.01276	0.995145	1.00802	1.00235	0.990161	1.01706	1.01961	0.998086	0.991092	1.01007	1.00948	0.98774		1.01228	0.991752	0.99641	1.00796	1.00845	0.999956	1.02816	0.999504	1.00335	0.995752
2.1	0.994903	0.999492	0.995323	1.0026	1.03368	0.984742	1.00823	0.984442	1.01588	1.00969		0.988891	1.00158	1.00046	1.00112	1.02768	0.984832	1.01709	1.00227	1.0012	1.00067	0.981021	1.02348	0.990743	0.994342		1.02115	0.992588	1.00442	1.00957	1.00664	1.01606	1.00739	0.968066	0.988841	0.99968	1.00578	0.996933		0.99805	1.00193	1.0126	1.0037	1.00009	0.991539		0.99241	0.99949	0.992424
2.133	0.999582	1.00415	1.00486	1.0197	1.02587		1.00551	1.00421	1.03072	1.02426		0.99836	0.992747	0.993002	1.00073	1.00178	0.979987	1.00481	1.00268	1.00508	0.991504	0.99796	1.01067	0.998275	0.995678		1.01217	0.999446	0.990666	1.00541	0.996336	1.02152	0.995934	0.989552	0.988454	0.987248	1.00948	1.0178			0.99376	1.01544	1.01303	0.995195	1.00837	1.02033	0.995922	1.00222	1.00257
2.167	1.00491	1.00771	1.00054	0.999411	1.01438	0.989313	1.00044	0.989039	1.05111	1.0161		0.990164	1.0031	0.98998	1.00911	1.00161	0.978216	1.00604	0.99931	1.0006	0.996173	0.985933	1.0118	0.980863	1.00457		1.02031	1.00562	0.976076	1.02016	0.998074		0.994471	0.991105	0.985657	1.00327	1.00345	1.00768		1.00573	0.985594	1.00781	0.992435	1.00371	0.998817	1.01938	0.999672	1.00494	1.00355
2.2	1.00114	1.01346	1.00442	0.995597	1.01241	0.9831	1.01182	1.00473	1.05468			0.993237	1.0156	0.998624	1.00341	1.00217	0.987172	1.01733	0.996928	1.00102	0.980233	0.99142	0.99915	0.977517	0.993559		1.0248	1.00088	0.987445	1.01639	0.996506	1.03025	0.993008	0.991471	0.978743	0.981159	1.00328	1.00432		1.01109	0.989519	1.01267	1.0173	0.985181	1.00311	1.01518	1.00751	0.993141	0.998843
2.233	1.00822	1.011	0.989287	1.00605	1.02085	0.988277	1.00211	1.0041	1.06755	1.01125		0.986666	1.0121	1.00625	0.999387	1.00011	0.997332	1.00802	0.995532	1.00347	0.978444	0.987491	0.996247	0.97713	0.991116		1.00802	0.997793		1.01867	0.995926	1.02033	0.998385	0.988302	0.973148	0.971315	0.998055	1.00993		0.995432	0.987827	1.01174	1.01963	0.997379	1.01233	1.00925	1.00741	0.994904	0.990642
2.267	1.00335	1.01501	0.999908	1.00455	1.01762	0.988277	1.01374	1.00148		0.999523		0.988115	1.02111	1.00434	1.01274	0.996639	1.00492	1.00727	0.995363	1.00735	0.990311	0.975563	1.00205	0.98289	1.00079		1.01336	0.999757	0.993579	1.00407	1.00548	1.00757	1.01337	0.986687	0.986816	0.997119	0.996357	1.01445		0.994239	0.988752	1.00149	1.01206	1.00175	1.01056	1.02302	1.00106	0.997796	0.990238
2.3	0.994713	1.01785	1.00882	0.998348	1.01115	0.992419	1.0099	1.01762	1.05992	0.984955		0.990588	1.01593	1.01775	1.00682	1.00485	0.995961	0.99928	1.0021	1.00043	0.998703	0.996669	1.00592	0.980863	0.993235		1.02396	1.00375	0.988652	1.0094	1.02336	1.00194	0.989792	0.988454	0.980448	0.994853	1.01245	1.015		1.00295	0.992677	1.00395	1.01086	0.999937	1.01056	1.00964	1.00048	0.999724	0.974574
2.333	0.998479	1.0088	0.99838	1.00862	1.01286	0.995525	1.00631	0.998231	1.04655	0.997323		0.992637	1.00867	1.00894	1.00626	0.997425	1.00064	0.983616	0.98427	1.00515	0.995823	0.985456	1.01463	0.966252	0.997015		1.00964	1.00119	0.983044		1.01158	1.00781	1.00093	0.999639	0.975399	0.971543	1.00312	1.01406		0.995994	1.00084	1.01899	1.014	1.00197	1.01112	1.01938	0.993221	0.980375	0.985936
2.367	1.00426	1.011	1.00774	0.998788	1.02111	0.986384	1.01323	1.01213	1.03438	1.00703		0.983168	1.01649	1.00188	1.00705	0.993238	0.994992	0.985015	0.988626	1.00372	0.992347	0.979731	0.997146	0.980863	1.01464		0.998198	1.003		1.01357	1.00821	0.992617	0.986801	0.988454	0.982699	0.977793	1.01921	1.01351		1.01821	0.984894	1.00357	1.0107	1.00521	0.987079	1.02207	1.004	1.01505	0.985198
2.4	1.00049	1.00067	0.995585	0.994716	0.995346	0.993632	1.005	0.998231	1.03753	1.01766		0.992389	1.01975	1.00395	0.989342	0.998536	1.00548	0.992932	0.999549	1.0027	0.997685	0.982916	1.0156	0.979383	0.987498		1.01413	1.00337	0.98828	1.01129	0.999473	1.00194	0.994787	0.998755	0.964369	0.996864	1.01495	0.993967		1.01453	0.973729	1.01059	1.0173	0.992481	1.01112	0.984076	1.00146	0.996832	0.989904
2.433	0.995816	1.00506	1.01034	0.984261	0.99821	0.975779	1.01113	1.00167	1.00398	1.00062		0.994862	0.989018	1.01085	1.00325	0.993861	1.01073	0.985185	0.994785	0.988006	0.992173	0.983492	1.00682	0.981797	0.991278		1.00676	1.00556	0.976539	1.01717	1.01455	1.01227	0.99202	0.979403	0.982379	0.99803	1.01671	1.01258		1.02188	0.986361	0.995391	1.02429	0.998658	0.990969	1.02498	0.991836	1.00149	0.979517
2.467	0.98452	1.00926	0.991186	1.00411	0.998842	0.987597	1.01787	0.998865		1.01656		0.999208	0.996504	1.02656	1.00214	0.99458	1.03148	0.977268	1.00128	1.00043	0.992173	0.980545	1.00666	0.995089	0.99962		0.99532	1.00029	0.997262	1.01051	1.00961	1.00823	0.98626	0.984036	0.994728	1.00373	1.01181	1.01523		1.00821	0.98566	0.993315	1.00603	1.001	0.984162	1.02498	0.993627	1.00229	0.976022
2.5	0.990948	1.0099	1.00009	0.988516	1.01033	0.990703	1.00624	1.00518	0.998734	0.990722		0.997159	1.00996	1.00625	0.988067	1.00848	1.0135	0.991533	0.995363	0.999166	0.99098	0.988404	1.00392	0.999595	1.00324		1.01023	0.999008	0.991283	1.00541	1.00483	1.0131	0.996857	0.99522	0.990226	1.00732	1.02501	1.00526		1.0194	0.98681	0.993156	1.0103	0.982997	0.988857	1.02387	0.997545	1.00052	0.995348
2.533	0.997187	1.0099	0.994876	0.993211	0.999735	0.993809	1.00247	0.989487	1.00468	1.01546		0.994686	1.0156	1.00013	1.01019	0.993401	1.01423	0.982146	0.996589	0.991818	1.00446	0.974988	1.00062	0.997728	1.00402		1.00904	0.997729	0.990756	1.00219	1.01199	1.01797	0.990016	0.99007	0.993663	1.00334	1.01938	1.00961		1.01364	0.997591	0.989003	0.9967	1.00281	1.01444	1.02712	0.996734	1.00518	0.994039
2.567	0.994981	1.00332	0.997037	0.987194		0.982953	1.01367	0.998865	0.984583	1.01857		0.990588	1.01464	0.989422	1.00237	1.00178		0.988494	0.991656	1.00035	1.00243	0.979492	0.994809	0.981797	0.997015		1.00802	0.990276	0.981556	1.01678	1.00804	1.01293	0.993707	0.993605	1.02698	1.01092	1.00835	1.01358		1.0142	0.993892	1.00928	1.02486	0.994446	0.997678	1.02577	0.986533	0.997231	0.988358
2.6	0.997644	1.00752	1.00442	0.998713	1.00252	0.986666	1.00352	0.992551	0.982902	1.02232		1.00663	1.00254	0.983079	1.00711	0.991897	0.974936	0.995491	0.998393	0.99892	0.995227	0.978272	1.00222	0.980863	1.01826		1.01582	0.992989	0.976693	1.00768	1.01636	1.02041	0.991479	1.00391	0.986043	1.00334	1.01825	1.01771		1.01404	0.986651	0.997561	1.0029	1.00951	1.01039	1.02325	0.987512	0.995702	0.986409
2.633	1.01894	0.99363	0.999384		1.00055	0.983131	1.01156	0.995615	0.966661	1.0117		1.00458	0.996408	0.993397	1.00158	0.984472	0.971696	1.00761	1.0071	0.990383	1.00608	0.977289	1.00512	0.972398	0.993397		1.00395	0.99171	0.979542	1.00157	1.02015	1.00444	0.989476	1.00302	0.999164	0.997319	1.02171	1.01507		1.01036		1.00519	1.01183	1.0077		0.999581	0.991598	0.992012	0.991519
2.667	1.00453	0.988332	0.98075	0.99853	1.00226	0.979167	1.02573	0.985603	0.950421	1.00639		1.00705	0.997364	1.00395	0.985939	0.993957	0.97751	1.00143	1.00397	0.997485	0.990311	1.00036	1.00342	0.972238	1.00347		1.00574	0.99171	0.956804	1.01899	1.00087	1.0162	0.984639	0.997872	0.992703	1.00467	1.01262	1.01148		1.02003	0.988501	0.985841	1.02116	1.00243	0.991608	1.01242	0.992004	0.99281	0.989402
2.7	1.00921	0.996733	0.984625	1.0026	1.00315	0.986666	1.01559	0.993898	0.969532	1.00438		0.999633	1.01329	0.989027	0.996215	0.994905	0.983462	1.00877	0.999041	0.99892	1.00337	0.985218	0.99698	0.983663	0.977266		1.00473	0.983883	0.936016	1.00856	1.00927	1.00587	0.994089	0.999639	0.987494	1.01788	0.998621	1.00478		1.01212	0.998741	0.985458	1.02309	1.00552	0.998817	1.02383	0.989471	0.978047	0.991351
2.733	1.007	0.985041	0.987048	1.00987	1.0055	0.986843	1.01961	0.993449	0.966169	1.00438		1.00808	1.00023	1.00109	0.992189	0.995691	1.00331	1.0114	0.998055	1.0028	1.00888	1.01171	0.996178	0.998275	1.00536		1.00329	0.996231	0.934746	1.00612	1.00828	1.00528	1.01	0.97992	0.989906	1.01319	1.00658	0.988581		0.99805	1.00059	0.989003	1.01103	1.00552	0.996872	0.998889	0.99143	0.982137	0.998814
2.767	1.00811	0.987047	0.991633	0.990901	0.993559	0.994949	1.01287	0.989116	0.964487	1.00062		1.0056	1.0125	0.992281	1.00587	0.997195	0.996294	1.00259		0.985065	0.992522	1.04509	0.986265	0.991356	1.01944		0.990653	0.976804	0.943638	1.00573	1.00729	1.01175	0.985179	0.991989	0.995501	1.01163	1.00812	0.995743		1.00924	1.00282	0.988844	1.00773	0.982093	0.982787	0.992698	0.978054	0.996267	0.993704
2.8	1.00765	0.984853	1.00207	1.00561	1.01806	0.984166	1.01225	1.00021	0.991022	1.00969		1.00476	1.01807	0.98331	0.993531	1.00004	0.986369	0.99928	0.997646	1.00035	1.00685	1.03821	1.01641	0.982343	1.00748		0.99641	0.985381	0.957021	1.00589	0.987193	1.00712	0.990939	1.00089	0.985177	0.991231	0.99379	0.994194		1.0098	1.01223	1.00226	1.01006	0.969365	0.997845	1.00932	0.99518	1.00774	0.991922
2.833	1.00434	0.980841	0.988577	0.994716	1.00029	0.988559	1.01794	0.998942	0.990325	0.993567		0.99776	1.01346	0.98768	0.995822	0.982277	1.00348	0.988394	0.994855	1.00322	0.999125	1.0023	1.01367	0.974104	1.00386		0.982338	0.98613	0.955071	1.00378	1.01421	1.01216	0.999242	0.996773	0.996979	0.984592	0.99419	0.975902		1.01212	1.00075	0.995775	1.01473	1.0004	1.00586	1.0143	0.989639	1.00292	0.998007
2.867	0.999014	0.989884	0.998303	0.995597	1.00657	1.00209	1.02468	1.00615	0.97913	1.00373		0.994262	1.00597	0.978709	0.979067	1.0055	1.00114	0.99894	1.0002	1.00035	0.998281	1.03567	0.998915	0.981023	1.00409		0.982512	0.995391	0.948937	1.00527	1.00326	1.00024	1.00316	1.02554	1.00126	0.994208	0.996122	0.978935		1.00093	0.99335	0.995616	1.00033	1.00115	0.996234	1.00646	0.997139	1.01014	0.99525
2.9	1.0059	1.01565	1.00263	1.00436	1.00371	0.995274	1.00954	1.01138	1.00567	0.996678		1.00476	1.0027	0.975619	0.988786	1.00076	1.00485	1.01065	0.997237	1.00931	1.01184	1.03608	1.02011	0.957946	0.992519		0.976581	0.998478	0.975704	0.998998	0.997905	1.01561	0.997621	1.01473	1.00389	0.980059	0.991126	1.00239		0.991099	0.992042	1.00935	1.02343	1.0004	0.993316	1.00955	0.994943	1.01303	0.993468
2.933	1.01187	1.01236	0.998303	0.986206	1.00326	1.0007	1.01689	1.02898	0.973677	0.987155		1.00415	1.00247	0.984426	0.985939	0.99729	1.00057	0.995562	1.00455	0.981601	1.00158	1.00819	1.00536	0.952893	0.992519		0.988269	1.00135	0.967556	0.994056	0.99091	1.00747	0.991321	1.00391	0.991704	0.99272	1.00449	0.997548		1.00166	1.00167	1.00357	1.00476	0.99694	0.994692	1.02157	0.994775	1.00452	0.992493
2.967	0.997911	0.991624	0.989395	1.00631	0.997425	0.996738	1.00972	1.0353	0.97704	0.986055		0.997584	0.988294	0.996718	0.994317	1.00472	1.01688	0.99911	0.99921	1.00214	0.994631	1.01751	1.01447	0.993929	0.985905		0.992761	0.99698	0.958138	0.967532	0.999643	1.01335	1.01582	1.00796		0.988186	1.00215	0.99887		1.00901	1.00614	1.00619	0.990199	0.988954	0.969272	1.00971	0.996734	1.00066	1.00288
3	1.01674	1.0225	0.992637	1.01526	0.991141	1.00338	1.00508	1.0159	0.982782	1.0106		1.00748	0.99522	1.00227	0.997164	1.00835	0.996861	1.00587	1.00496	0.983804	1.00032	1.0171	1.00536	1.00574	1.00204		0.995392	0.98697	0.971675	0.986288	0.999643	0.996967	0.991545	1.00244	1.01251	0.984592	1.00119	0.991161		0.9955	1.00738	1.00302	1.00066	1.01366	0.992747	0.988896	1.00994	1.00605	0.991922
3.033	1.00985	1.01629	0.998488	1.02164	0.993113	1.00606	1.02005	1.01049	0.973473	0.993378		1.0114	1.01744	1.00513	0.999224	1.00148	0.990646	1.0001	1.00357	0.981529	1.00422	1.02086	1.01914	1.00272	0.992357		0.992339	0.982074	0.961205	0.986288	0.987533	1.00225	0.999914	1.01466	0.996207	0.990614	0.993224	0.996064		1.00318	0.995134	1.00079	0.989399	0.998594	0.981412	1.01066	0.987275	1.00059	0.989402
3.067	1.00719	1.01035	1.00046	1.01544	0.994822	1.00899	1.01874	1.00264	0.972692	0.988899		1.0114	0.990602	1.00244	0.984367	1.00321	0.999201	1.01658	0.995842	0.995978	0.997438	0.999349	1.01527	1.00699	0.988186		0.984373	0.984038	0.95978	0.966038	0.988522	0.998811	0.995301	1.00436	1.01344	0.981387	1.00022	0.985936		0.992553	0.9996	1.01043	0.972502	1.01584	0.991205	1.02174	0.993389	0.999792	1.00587
3.1	1.00563	1.00789	0.995879	1.00092	1.00497	1.00252	1.01935	1.00589	0.966049	1.00081		1.01387	0.968473	1.00625	1.01392	0.994838	1.01009	1.00942	1.00479	1.00315	1.00151	1.00802	1.01567	1.01018	0.987241		0.985812	0.988248	0.978181	0.970037	0.980778	1.00771	0.996606	1.01091	1.01251	1.0046	1.00489	0.997774		0.99391	0.990509	0.99801	0.979101	0.99588	1.00619	0.998074	0.979607	0.991846	1.00117
3.133	1.00921	1.02223	0.986339	0.991524	0.993853	1.00209	1.01472	1.00328	0.974169	0.991288		1.01815	0.98018	1.01164	0.994873	1.00518	1.01026	0.996551	1.00421	0.993181	0.990486	1.01612	1.01544	1.01655	1.00171		0.988443	0.997665	0.965914	0.986516	0.968837	0.994533	0.995841	1.00274	1.00724	1.01172	0.996757	1.00135		1.0047	0.994434	1.00079	0.975401	0.999343	0.998984	0.993879	0.985721	0.99321	0.984362
3.167	0.996997	0.999116	1.0002	0.99002	0.971582	0.9977	1.00606	1.0177	0.963875	0.992388		1.01967	0.983049	1.00355	0.99124	1.00115	0.995824	0.995562	1.01752	0.988702	0.999896	1.00958	0.998348	1.00287	1.00722		0.97395	0.990212	0.966068	1.00472	0.996096	0.994706	1.00122	0.997746	1.01174		1.00199	1.00174		1.00582	0.994592	0.99801	0.970901	1.00605	0.984899	0.981619	0.980992	0.96608	0.992966
3.2	1.00609	0.978568	0.99327	1.00367	0.981546	0.999164	1.005	0.998942	0.9608	0.9955		1.00797	0.983049	1.00546	0.986265	1.00226	0.991311	0.995562	1.01276	0.988282	0.990661	1.00287	1.00439	1.00551	1.00895		0.991569	1.01023	0.986483	0.991458	0.987363	0.995959	0.998991	0.988695	1.01361	1.00884	1.01751	0.995356		1.00135	0.988659	0.987759	0.981365	1.001	0.980371	0.991191	0.980586	0.987591	0.998243
3.233	1.00765	0.953256	0.999307	1.02865	0.982255	1.0052	0.998446	0.980449	0.970602	0.981576		1.01275	1.00821	1.01045	1.00515		0.999298	0.997301	1.01119	0.994195	0.998878	1.00328	0.998182	1.01491	1.00816		1.00775	0.994423	0.984905	0.990906	0.988182	1.00486	0.999373	1.00238	1.00257	1.00978	0.994825	1.00587		1.00192	0.9989	1.00357	0.981365	0.992947	0.992914	0.992141	0.979607	0.986227	1.00157
3.267	0.991026	0.972628	0.98231	1.06071	0.97192	0.998129	1.01113	0.987212	0.990206	0.989088		1.00038	0.998812	1.01236	1.00459	1.01388	1.01293	0.99812	1.00683	0.991152	0.991926	1.01456	1.00422	0.997275	1.0125		1.01122	0.994423	1.00764	0.986355	1.00251	1.00789	0.999373	0.987811	1.02277	1.00767	0.993859	1.00323		0.996721	1.00145	1.0105	0.974767	1.00605	0.999554	1.0063	0.986295	1.00172	1.00278
3.3	1.00251	0.994006	0.986	1.0515	0.989247	0.993381	1.00352	0.98243	0.982086	0.987532		1.01062	1.00686	1.01006	1.00286	1.01064	1.00317	1.0015	1.00864	1.00095	1.00565	0.995181	1.00269	1.00667	1.00793			0.999537	1.00495	0.989963	0.992789	1.01109	0.998991	1.00753	1.01399	1.01502	0.975599	0.988742		1.01175	1.00738	1.01343	0.976699	0.998439	0.999956	1.00496	1.00065	1.01256	0.996698
3.333	1.00407	1.00369	0.999045	1.02909	0.992743	1.00959	0.994859	0.986763	0.986434	0.984876		1.00123	0.990535	0.989027	0.995429	1.00171	0.994619	1.00621	1.00602	1.00602	1.01057	1.00385	1.0097	0.998982	1.00754		1.00164	0.993893	1.0033	0.992238	0.97863	1.01679	0.996382	0.984428	0.996593	1.00822	0.984929	1.00736		0.98977	0.992359	1.00133	0.978466	0.998968	0.985135	0.996173	0.996902	1.00348	0.99337
3.367	0.997376	1.0088	0.992931	1.01456	1.00029	1.01416	0.995294	0.990013	0.970194	0.984421		0.993807	0.990138	1.00069	0.99101	1.00187	1.00979	1.01542	1.00149	1.00948	0.995823	0.994606	1.00172	0.982277	1.0136		1.0035	1.00805	1.00008	1.00001	0.975422	1.02141	1.0016		1.00148	1.00049	0.971969	0.987419		1.00056	0.986202	1.01082	0.98563	1.00221	0.989427	1.00194	0.998861	1.00525	0.996531
3.4	1.0151	1.00835	1.00012	1.00092	0.999027	1.00606	0.991707	1.00679	0.9802	1.00081		0.99568	0.989742	1.01124	0.992514	0.996342	1.00705	0.988394	1.0116	1.0056	0.993612	0.988473	1.00269	0.990356	1.03312		1.00638	0.995637	1.00046	1.00378	0.968668	1.01529	1.01305	1.01216	1.00483	1.01408	0.955711	1.00355		1.00864	1.00623	1.0075	0.971067	1.00018	0.989427	0.995453	1.00947	1.0091	1.01139
3.433	1.0016	1.00369	0.991851	1.00367	0.989062	1.00277	0.987684	1.00092	0.99238	0.9933		0.994656	0.989742	1.00989	0.990616	1.0089	1.00591	0.996381	1.00782	0.99563	0.987257	0.990845	0.994878	1.00233	1.00637		0.995958	1.01438	0.993579	0.990906	0.982827	1.01227		1.01503	0.991704	0.999386	0.969871	0.99887		1.00265	1.01048	0.999703	0.971067	1.00168	1.00133	0.998861	1.00416	1.01352	1.00295
3.467	0.998479	1.01035	0.985367	0.995962	0.992296	1.00095	0.982176	0.998122	0.982374	0.968108		1.00473	1.00646	1.00434	0.996703	1.01087	1.00301	0.995152	0.994347	0.987688	0.992347	0.990607	1.00342	0.996342	1.00865		1.01968	0.998569	0.986701	0.986355	0.992549	1.0252	1.0066	1.00634	1.00389	1.00032	0.978235	1.00184		0.998805	0.982278	1.00395	0.978632	1.00892	0.996636	0.985882	1.00555	0.995537	1.00709
3.5	0.997376	1.00214	0.989504	0.988881	1.00011	0.997596	0.98051	1.00227	0.975936	1.00529		1.00045	1.01817	0.98459	0.992907	1.0145	0.997928	1.00942	1.00388	1.00028	0.987853	0.98627	0.996247	1.00256	1.01227		1.01824	1.00399	0.99934	0.985803	0.988762	1.02437	1.00475	1.00598	1.0011	1.00939	0.975336	1.00635		0.996886	0.990827	1.00526	0.985064	1.00243	1.00619	0.991978	1.00791	1.023
3.533	0.985166	0.998207	0.989504	0.99464	1.00163	1.00467	0.982431	0.996218	0.976632	0.994211		1.00642	1.00415		0.986984	1.00557	0.998897	1.00703	1.0033	0.993601	1.006	0.993792	0.997781	1.0191	1.01054		1.01087	0.999848	0.999122	0.98824	1.00087	1.01832	1.00367	0.972788	1.01042	1.00806	0.981934	1.00487		1.00384	1.0017	0.994148	0.996729	1.00717	0.994456	0.993879	1.0142	1.00751	0.995319
3.567	1.00601	1.0004	0.978435	0.995704	1.00442	0.998453	1.00432	0.997936	0.983563	1.00768		1.01999	1.00893	1.00769	1.00541	1.00976	0.998897	1.00225	1.00585	0.982789	0.99642	0.975801	1.01317	1.00185	1.01132		1.01147	1.01039	0.989024	0.987849	0.994937		1.00045	1.00796	1.00988	1.01486	0.981934	1.02932		0.984573	0.998068	0.993605	0.984498	0.997689	0.998178	0.995223	0.996902		1.0135
3.6	1.00023	1.00725	0.995617	1.00961	1.00665	1.00717		0.998122	0.973473	1.0139		1.01384	1.01108	0.997603	1.00099	1.00138	1.00511	1.00942	1.00248	1.01641	0.987853	0.992333	1.00753	1.00619	1.01527		1.00901	0.998943	0.996582	0.99617	1.0007	1.01119	0.993073	1.01186	1.00087	1.0011	0.997295	1.00697		0.98593	1.00199	0.99469	0.99013	1.00462	0.998748	0.9828	0.994537	1.00245	1.01472
3.633	1.00114	0.995104	1.00192	1.00517	1.00513	0.995096	0.98156	0.981795	0.965641	1.00465		1.00787	1.01546	0.986264	0.988814	1.00636	1.00083	0.997301	0.998294	0.977471	1.00387	0.982102	0.996081	1.00635	1.00999		0.998764	0.994423	0.991192	0.983137	1.00763	1.01606	0.996223	1.00561	1.00631	0.99563	1.00309	0.99871		0.994966	1.0107	0.999769	0.989564	1.00334	0.997942	0.982243	1.00751	0.996267	1.00789
3.667	1.00114	0.992909	1.01541	1.01412	1.00576	0.979063	0.986198	0.96584	0.981389	1.00419		1.01734	0.986642	0.977457	0.99955	1.00083	1.01236	1.00184	0.985228	1.0083	0.994631	1.00639	0.998583	1.00977	1.02045		0.996554	0.995172	1.00563	0.98486	1.00367	1.01084	1.01267	1.00509	0.987362	1.00165	1.00856	1.00719		0.998641	1.00391	0.99006	0.984333	1.00025	1.00053	0.984931	1.00221	1.01658	1.00497
3.7	1.014	0.993175	1.0046	1.01376	0.992373	0.998202	0.980945	0.96666	0.968019	1.00639		1.00582	1.0001	1.00253	1.01195	1.0006	1.00204	0.994092	1.00051	1.01134	1.00099	1.00819	0.980126	1.01031	0.997473		0.989184	0.992304	0.994413	1.00134	0.99074	1.00538	1.00061	1.02944	0.992571	0.982809	1.02385	1.01265		0.98881	1.00199	0.989518	0.980067	1.01042	1.00418	0.976541	1.00221	1.01754	0.997101
3.733	0.989845	0.972894	0.999198	1.015	0.997132	0.993454	0.986634	0.968192	0.955142	1.01371		1.01324	0.993007	0.997209	0.988556	1.00953	1.0114	0.982556	0.998125	0.991746	0.997088	1.00131	0.969245	1.01575	0.997473		0.995115	0.988997	0.999277	0.994352	1.00128	1.01428	1.00023	1.0143	0.992731	0.98867	1.01765	1.0121		0.992251	1.00407	0.985814	0.995031	1.00168	0.994858	0.975753	0.990787	1.02004	0.999858
3.767	0.993421	0.988332	1.03024	1.01482	1.00881	0.987597	0.98051	0.996699	0.969005	1.01572		1.01879	1.00257	1.00546	1.00207	0.999025	1.01026	0.99887	0.996729	1.01008	1.00404	0.994606	0.975121	1.01218	0.999525		1.01579	0.99171	0.998596	0.982813	0.985624	1.01327	1.00469		0.994436	0.980931	1.01918	1.00984		0.994966	1.00123	0.973327	0.992698	1.00589	0.997776	0.985488	1.00359	1.00863	1.00863
3.8	0.997376	0.987878	1.02026	1.00968	1.01446	0.994416	0.986453	0.976487	0.962482	1.00666		1.01367	1.00471	1.01331	1.00436	1.00187	1.0013	1.01395	1.00667	1.00357	0.995227	1.00369	0.984799	0.997182	0.995354		1.00308	1.00128	0.993579	0.990192	0.994767	1.00681	1.00984	1.02371	1.00679	0.965065	1.02112	1.00594		0.983778	0.999759	0.982044	0.999696	1.02059	0.991539	0.979555	0.989234	1.00591	1.01488
3.833	0.997187	0.997564	1.01549	1.00693	1.00144	0.986917	0.9729	1.00978	0.953869	1.01216		0.999675	1.00511	1.0068	1.0133	0.997128	1.0114	0.996481	0.994178	1.00805	0.996245	0.993961	0.998652	1.00767	0.991574		0.998764	0.999848	1.00891	1.00345	1.00152	1.00496	1.01337	0.997077	1.00453	0.974132	0.993527	1.0001		0.997846	1.02202	0.986674	1.00573	1.00446	0.983926	0.989846	1.00082	0.99467	1.00685
3.867	0.99829	0.99363	1.01809	1.01332	1.01985	0.994594	0.976487	0.983436	0.948415	1.01683		1.00685	0.999537	1.01545	1.00776	1.01008	0.993318	1.00126	0.991218	1.00298	1.01022	0.989624		1.01257	0.995192		1.00283	1.00188	1.0113	1.00456	1.00538	1.00034	1.00131	0.981839	1.00492	0.970537	1.00246	0.999324		0.985533	1.00939	0.97719	0.997764	1.00664	0.980773	0.98929	1.00376	1.00375	1.01334
3.9	0.997187	0.985872	1.01072	1.00455	1.00881	0.99063	0.979204	1.00238	0.975563	1.02168		1.01367	0.999141	1.0026	1.00737	0.990258	0.993083	0.987744	0.982338	1.01092	0.991402	0.993961	0.994947	1.00449	0.990629		0.994447	1.00474	1.01399	0.995847	0.997635	1.00319	1.00446	0.988606	1.01765	0.964127	0.984432	1.00384		0.986493	0.990509	0.978275	1.00516	1.00122	0.995025	0.979161	1.00474	1.0096	1.02453
3.933	0.997833	0.998661	1.03349	1.00561	1.0097	0.991059	0.975001	1.00697	0.95674	1.02544		1.00377	1.00359	0.994581	0.998601	1.00455	1.0001	0.995491	1.00099	0.988108	0.991998	1.00697	1.00196	1.00822	1.01077		1.00564	1.00331	0.998288	1.02104	0.996067	1.00907	1.007	0.983455	1.01408	0.96186	0.977434	0.998001		1.00655	1.00738	0.993315	1.00669	1.01357	1.00264	0.979718	1.00572	1.00671	1.00513
3.967	1.01004	1.00241	1.02286	0.997466	1.01966	1.00038	0.971849	1.00499	0.972692	1.01637		1.00462	1.00152	0.991886	0.986035	1.00913	1.00244	0.980987	0.983325	1.00543	0.989962	0.999448	0.991642	1.01514	0.997082		0.987251		1.00278	1.01821	0.997875	0.990672	1.00385	0.999791	1.01167	0.971087	1.00229	0.997614		0.998641	0.996442	0.984214	0.9873	1.00091	1.01374	0.982963	1.00555	1.00591	1.01885
4	1.01069	0.992909	1.03177	1.00341	1.01041	0.991916	0.975437	0.988032	0.971995	1.01398		1.00052	0.996176	1.0049	0.991891	1.00131	0.99599	0.978598	0.995235	0.99892	0.990805	0.997483	0.999219	1.0097	0.977724		0.990129	1.00602	1.00532	0.978357	0.995897	0.999992	0.991255	0.987722	1.00267	0.963966	0.99786	1.00213		0.996556	1.00668	0.9876	0.997764		0.979565	0.970377	1.00768	1.00943	1.01317
4.033	1.00426	0.999947	1.02629	0.987376	1.00234	0.988381	0.968877	1.00085	0.96486	0.991633		1.02169	0.984237	0.992675	1.0182	0.996735	1.00301	0.984535	0.979787	1.00298	1.0131	0.999855	1.01808	1.00014	0.994638		0.98869	1.0088	1.00891	0.987002	1.00043	0.996967	1.00516	0.992141	1.00547	0.96811	0.970672	1.00532		0.994075	1.00668	0.998553	0.993498	0.992016	0.990497	0.97703	1.00572	1.01096	1.01162
4.067	1.00472	0.997752	1.00784	0.995704	1.00818	0.986562	0.971414	1.00193	0.958133	0.991633		1.00625	0.990602	0.989422	0.997978	0.999418	1.00866	0.985935	1.00337	1.00543	1.0031	1.00378	1.01067	0.997888	1.00125		0.981742	0.99698	1.01288	0.961097	1.00521	0.995123	0.99571	0.996193	1.00826	0.982259	0.99786	0.992937		0.996954	1.01054	0.991145	1.00806	1.00512	0.986774	0.957167	1.00572	1.0071	1.013
4.1	0.99829	1.00789	1.01783	0.980295	1.00799	0.99131	0.98069	1.01915	0.982001	1.02012		1.00565	1.00478	0.997835	0.993789	0.99981	1.00438	0.991293	1.00041	0.998253	1.00759	1.00084	1.00366	1.00915	0.992911		0.984445	1.01151	1.00315	0.969808	1.00043	1.00831	1.00147	0.998692	1.00058	0.986953	0.960541	1.0089		0.994637	0.993667	0.988208	0.9869	1.00459	1.01212	0.97221	1.00612	1.01698	1.0173
4.133	1.00582	1.01364	1.01738	0.996144	1.01167	1.00838	0.980255	0.998942	0.965965	0.996489		0.998051	0.987502	0.999346	1.00106		0.995422	0.985525	1.00435	0.991746	1.01454	0.998059	1.00309	0.988556	0.982287		0.983428	1.00699	0.981838	0.986126	0.993509	0.978499	0.997555		1.01013	0.995241	0.96424	0.989356		1.00559	1.00799	0.993605	1.00146	1.02274	0.993984	0.977913	1.01379	1.00807	1.01714
4.167	1.00361	1.00551	1.01325	0.996585	1.01669	1.00045	0.976668	1.00029	0.96289	1.01986		1.00547	0.982721	1.00046	1.00776	0.998306	1.0127	1.00976	0.991458	0.997659	1.00022	0.98505	1.00559	0.991742	1.00581		1.00182	1.01167	1.00008	0.989182	1.00381	0.97144	1.00217	0.986258	1.00019	0.994853	0.958775	0.992002		0.992087	1.00707	1.01781	1.0042	0.989832	0.975773	0.977356	1.01379	1.01754	1.00715
4.2	1.00141	1.0046	1.00479	1.00348	1.01732	1.00131	0.986379	1.00156	0.958337	0.996222		1.00342	0.982885	0.991097	0.995361	1.00154	1.00414	0.994671	1.00592	1.0056	0.991649	0.983085	0.996482	1.00503	0.997244		0.997746	1.01023	1.00061	0.994285	1.01353	0.966153	0.997555	1.00348	1.00601	0.991875	0.968105	1.00478		0.989207	1.00037	1.00964		1.0073	0.982983	0.969916	1.0169	0.997796	1.01438
4.233	1.00187	1.01081	1.01082	0.996661	1.01112	1.00899	0.969928	0.991359	0.952595	1.00108		1.00752	0.993867	1.00411	0.99101	1.0006	0.995755	0.991703	0.998364	0.996644	0.992492	0.979324	1.00987	0.998888	0.992681		0.996729	1.00662	0.983852	0.988792	1.01691	0.948938	0.997397	0.992292	1.00096	1.00172	0.973336	1.00836		0.972822	0.998133	1.00478	0.991	1.00256	0.9914	0.971817	1.00768	0.995634	1.0173
4.267	0.990569	1.01694	1.01515	0.990901	1.0087	1.00563	0.965725	0.989827	0.954973	1.00996		1.01716	0.992911	1.00546	0.994249	1.01774	1.00939	0.972999	0.990231	1.02663	0.990878	0.98881	0.985601	0.997568	0.981113		1.00392	0.993893	0.993425	1.00543	1.01329	0.98236	0.999242	0.983241	1.00321	0.997186	0.984197	0.988969		0.987685	1.00946	0.997917	0.997598	0.995479	0.990998	0.979026	1.00825	1.01113	1.0173
4.3	0.998557	1.00725	1.02909	1.02421	1.00134	0.994845	0.975001	0.999577	0.961412	0.99979		1.00914	0.989646	1.00355	0.989112	0.998144	1.00705	0.968221	0.996151	1.00382	0.994528	0.985288	0.984799	1.00021	0.988119		1.00638	1.00097	0.996492	0.99955	1.00695	0.991018	1.00277	1.00046	1.01293	0.989447	0.979698	1.00829		0.998709	1.00352	1.00865	1.02013	1.00708	1.00136	0.9374	1.02359	0.996033	1.01357
4.333	1.00388	1.01164	0.99696	1.00587	1.00178	1.00838	0.966341	0.994346	0.95567	1.00025		1.01102	0.999837	1.00125	1.00839	0.996409	1.01681	0.970441	1.00091	1.01421	0.987329	0.992978	0.98343	0.996795	0.991345		0.998589	1.00587	0.990884	0.986516	1.00596	0.989836	0.999783	1.00244	1.00469	0.995697	0.966338	1.01413		0.982324	1.00946	0.99801	1.0034	1.02546	0.999415	0.978796	1.00491	1.01129	1.03371
4.367	1.00655	1.02133	0.994984	1.0018	0.998102	0.99131	0.976052	0.988667	0.962108	1.0084		1.01264	0.992351	0.991097	1.00436	1.01545	1.00608	0.965592	0.998942	1.00914	1.00734	1.00853	0.96861	1.0051	0.986782		0.99936	1.00406	0.98221	1.00072	0.999784	0.98622	1.00185	0.999273	1.00469	0.996797	0.985564	1.00736		0.990962	1.00946	0.999703	1.02576	1.01055	0.99861	0.982434	1.00882	0.991943	1.02315
4.4	1.00563	1.00415	1.00822	0.996038	1.00375	0.99588	0.969928	0.981904	0.968054	0.98211		1.01264	0.990274	1.00007	1.01938	0.993564	1.0014	0.964263	0.989414	1.00896	1.00692	1.00026	0.985131	0.997408	1.0004		1.00571	0.999692	1.00225	1.0015	1.00654	0.978499	1.00239	0.989338	1.00469	0.997575	0.961508	1.00377		0.986163	1.00576	1.00564	1.02792	1.00799	0.993679	0.946904	1.01315	0.998127	1.01942
4.433	0.9981	1.00086	0.9617	0.994974	1.00528	0.992345	0.969928	0.983436	0.96588	0.993567		0.996602	0.985657	1.00181	0.995361	1.00478	0.993817	0.969211	0.998942	0.983036	1.01387	1.00599	0.972315	0.994768	0.983718		1.02056	1.01114	0.99141	0.996789		0.976655	1.00185	1.00177	0.993823	0.999064	0.968671	1.00526		0.983846	1.00707	1.00025	1.02719	1.01635	0.989789	0.972537	1.01078	1.00102	1.0251
4.467	1.00784	1.00789	0.993827	0.998788	1.0174	1.00338	0.970363	0.980372	0.972607	0.97881		1.00257	0.990834	1.0022	0.998994	0.996016	0.98212	0.94556	1.01126	1.01235	1.01896	1.01449	0.984163	0.991422	0.990562		0.995639	1.00752	0.993579	1.0095	1.01049	0.971195	1.00109	1.00464	0.989481	0.985692	0.978	1.00526		0.985203	1.01523	0.99801	1.01376	1.00633	1.00233	0.966604	0.998791	0.993472	1.0212
4.5	1.00361	1.00396	0.95801	1.00011	1.00052	0.998809	0.978408	0.996885	0.982817	1.0062		1.00155	1.00126	0.995303	1.00492	1.00328	0.984861	0.937982	0.997786	1.00053	1.00819	1.01293	0.992542	0.986916	0.992843		1.00326	1.01347	0.982954	1.01821	1.00381	0.9649	1.00001	1.00287	0.998099	0.978504	0.976634	1.01242		0.977292	1.013	0.987282	1.02156	1.00927	0.997637	0.967391	1.00352	1.0072	1.02551
4.533	0.997644	0.998661	0.962333	0.998606	1.01372	0.995525	0.988555	0.976859	0.974985	0.978165		0.999075	0.99608	0.999509	1.00112	1.00478	0.979615	0.928016	0.999351	1.00357	1.00717	1.01195	0.979324	0.991969	0.993788		1.00326	1.00805	1.01616	1.01177	1.00422	0.958014	1.005	0.9766	1.00579	0.98647	0.966738	1.0111		0.993677	1.01469	1.00047	1.02156	1.01672	1.00508	0.967948	1.00605	0.994436	1.01966
4.567	1.00361	0.992267	0.959909	1.00756	1.00115	1.00388	0.999317	0.969462	0.978553	1.01463		0.996602		1.02402	0.999224	1.0036	0.984861	0.933374	0.990231	1.00053	0.997582	1.01171	0.982228	1.00021	0.986		0.991394	0.999473	1.00606	1.01672	1.00818	0.954744	1.00793	0.995801	0.993983	0.984203	0.965372	1.01429		0.982886	1.01246	0.995233	1.01843	1.01145	1.00411	0.955362	1.00761	0.998526	1.02591
4.6	0.99829	1.0068	0.955772	0.997542	0.990555	1.00759	0.991707	0.974692	0.983802	1.00821		0.988582	0.992255	0.997998	1.00168	0.997521	1.00221	0.925217		0.987268	1.00759	1.01622	0.993509	0.993062	0.988119		1.00529	1.00459	1.00195	1.00784	1.0034	0.972967	0.99886	0.999702	0.999032	0.99398	0.965206	1.01164		0.983448	1.02308	0.99469	1.02446	1.00874	1.00394	0.964866	1.01038	1.02236	1.0208
4.633	1.00095	1.00441	0.958829	0.98771	0.991001	1.01095	0.99696	0.97316	0.974985	0.987877		0.9995	0.997432	1.01824	1.00587	1.00913	1.00705	0.919619	0.985707	0.98405	1.00081	0.985625	0.993509	0.993062	1.00425		1.00368	0.995856	1.00067	0.997799	1.01295	0.957179	1.00309	0.990499	0.991892	1.00117	0.984832	1.00564		0.978814	1.01099	1.01775	1.02019	1.01597	0.998846	0.963196	0.997574	1.01016	1.02315
4.667	0.999849	1.0099	0.959276	0.992406	0.987952	1.01035	0.99696	0.993372	0.988355	1.0007		0.980738	1.00914	1.00808	0.985709	1.00629	1.01236	0.932724	0.991458	0.994862	0.99895	0.983422	0.986901	0.987462	0.994571		1.01452	1.00368	1.00613	1.00557	1.01023	0.960622	1.00516	1.0097		0.999841	0.972038	1.00168		0.989043	1.02863	1.00063	1.02059	1.01379	1.02427	0.964703	1.00075	1.00631	1.02746
4.7	0.994981	1.01455	0.951897	0.993211	0.989661	1.01656	0.994424	0.985526	0.972811	0.995845		0.980313	1.00277	0.995861	1.00649	1.00115	1.00922	0.957435	0.986524	0.997137	1.021	1.01066	0.988269	0.986529	0.996299		1.01656	0.99698	1.01713	1.00839	1.02036	0.975157	1.01162	0.983644	0.992278	1.00962	0.963108	1.00768		0.987685	1.02177	1.00063	1.021	1.01379	1.00532	0.961852	0.997406	0.998595	1.02275
4.733	1.00076	0.997752	0.952344	0.992406	0.984009	1.02009	0.986634	0.972449	0.965676	0.990533		0.957278	1.00469	1.01269	1.00175	0.997913	1.01116	0.953067	0.973458	0.992064	1.00608	1.02882	0.984965	1.00961	1.00125		1.01003	0.999537	0.998198	1.02088	1.01435	0.965664	1.01124	1.00351	1.00649	1.00602	0.979601	1.00206		0.990002	1.01469	1.0112	1.0148	1.01214	0.984427	0.961852		1.00381	1.01885
4.767	0.994792	1.01073	0.958829	0.99391	0.991371	1.02009	0.994424	0.989859	0.986469	0.995201		0.952932	1.03097	0.999278	1.00783	0.993334	1.00825	0.961464	0.994248	0.993919	1.0032	1.02326	0.982062	0.995541	0.988119		1.00224	0.994642	1.01009	1.01483	1.01179	0.963647	1.01385	0.998212	1.00206	1.00211	0.964475	1.00019		0.984806	1.01376	1.00286	1.0016	1.00197	1.01511	0.948872	0.992914	1.0214	1.01707
4.8	1.00012	1.00369	0.962781	0.989032	0.997393	1.01199	0.998626	0.990494	0.974985	1.00711		0.949434	1.00564	0.9815	0.991633	0.99981	1.00421	0.973819	0.979787	1.00127	1.00523	1.0047	0.994712	1.00603	0.997082		1.00343	0.994112	1.0092	1.02094	1.00504	0.974322	1.02498	0.992695	1.00337	1.00648	0.986598	0.990225		0.980171	1.00467	1.01027	1.01383	1.00106	1.01431	0.963983	0.989164	1.01658	1.02843
4.833	0.996808	0.996467	0.964942	0.987528	1.00323	1.01035	1.00029	0.987878	0.959934	1.01022		0.967098	0.993539	0.992213	0.988	0.995393	1.0114	0.974979	0.986116	0.994934	1.00853	1.02933	0.989638	0.996635	0.999916		0.987673	1.00428	0.997236	1.01906	1.0048		1.01515	0.993213	0.999644	1.00836	0.969139	0.999258		0.986163	1.01176	1.00842	1.01383	0.996694	1.0029	0.969359	0.983861	1.01329	1.02608
4.867	0.998368	0.993175	0.954953	0.990536	1.01004	1.01613	0.995655	0.98941	0.968751			0.991407	0.998716	0.996419	0.993761	0.994052		0.978357	0.992853	0.994934	1.01117	1.0092	0.995113	0.989329	0.997635		0.99199	1.00503	0.986393	1.01435	1.00637	0.975157	1.01385	1.0044	0.990093	1.0082	0.97477	1.01881		0.98593	1.01415	1.00711	1.0173	0.991422	0.995123	0.980207	0.98859	1.0222	1.01942
4.9	0.993689	0.998473	0.970793	0.997359	1.01435	1.01959	0.995039	0.982013	0.954192	0.985677		0.988333	0.997692	0.997767	0.997001	1.00472	1.00438	0.974399	0.985129	1.00246	1.00481	1.04003	0.992776	0.971304	0.998809		0.98792	1.00103	0.995067	1.02039	0.994838	0.973314	0.998636	1.00726	0.999644	0.996314	0.977903	0.99871		0.985368	1.01638	1.0058	1.014	1.00069	1.00897	0.971817	0.983049	1.01618	1.02917
4.933	1.00122	0.996733	0.969527	0.995855		1.01002	1.00493	0.98941	0.973304	1.00245		0.974943	1.00979	0.995466	1.01477	0.987901	1.00124	0.965083	0.983564	0.992484	0.999299	1.02482	0.993177	1.00075	0.977171		0.996482	1.00615	0.989306	1.01756	1.0109	0.981453	1.0007	1.0119	1.00376	0.998741	0.970906	0.989129		0.980171	1.02901	1.00973	1.00387	1.00324	1.01464	0.963033	0.989164	1.0092	1.01707
4.967	1.01252	1.00313	0.97087	0.990278	1.00115	1.01959	1.00765	1.00421	0.979538	0.991822		0.994056	1.01322	1.00753	1.00656	1.00504	0.994218	0.973409	0.985538	0.999412	1.00608	1.02269	0.994145	1.00838	0.98936		0.992658	1.01067	1.00067	1.01678	1.01346	1.00253	1.00494	1.00586	0.998326		1.00139	0.996291		0.99232	1.03625	1.00957	1.02736	1.00686	1.02799	0.977125	1.00882	1.00318	1.02608
5	1.02225	1.02205	0.985629	0.986023	1.00851	1.04623	1.00152	1.01224	0.990529	0.997967		0.977592	1.01035	1.00927	1.01209	1.01554	0.994218	0.99969	0.984142	1.00753	1.00506	1.02113	1.01477	0.997888	0.988024		0.993429	0.998917	1.01062	1.01262	0.993778	0.984723	0.998794	0.99931	1.0036	0.996475	0.982402	1.00555		0.993279	1.04573	1.00047	1.03122	0.999627	1.01608	0.97942	1.01061	1.01458	1.03468
5.033	1.02868	1.02341	0.984996	0.992223	1.00978	1.04873	1.00493		0.989833	0.993378		0.973421	1.00191	1.00578	1.01359	1.01024	0.999298	0.994742	0.992853	1.01386	0.996667	1.05647	1.01574	1.01157	1.00572		0.976726	1.00344		1.0058	0.99139	1.00437	1.00993	1.00248	1.00003	1.00085	0.997129	1.01926		0.98944	1.05243	1.01851	1.03879	1.01039	1.03309	0.979026	1.01102	1.00142	1.01666
5.067	1.02492	1.02844	0.990847	0.998423	1.02432	1.04312	1.01526	1.01773	0.993196	0.995122		0.981265	1.009	1.01173	1.01297	1.01064	1.00221	1.0085	0.994417	1.02408	0.998528	1.06219	1.02121	1.02003	1.008		0.986131	1.01142	1.01929	1.00203	1.00094	1.00966	1.02069	1.0119	1.00019	1.00289	0.982237	1.02042		0.996556	1.04866	1.02314	1.03742	1.01167	1.05341	0.99984	1.01713	1.00527	1.0251
5.1	1.02868	1.02579	0.996512	1.00011	1.03257	1.04502	1.01761	1.03208	1.00775	1.01921		0.956781	1.03862	1.0211	1.01755	1.02169	1.00083	1.03157	1.0083	1.01344	1.02328	1.06693	1.0333	1.02904	1.01067		0.995115	1.01903	1.03014	1.01812	1.00408	1.01234	1.02791	1.01351	1.01672	1.02063	0.97927	1.03133		0.998874	1.04834	1.02021	1.03316	1.0146	1.04385	0.9943	1.04723	1.02349	1.03135
5.133	1.04355	1.03173	0.999755	1.00737	1.03391	1.04398	1.02838	1.02405	1.0135	1.01481		0.980065	1.02955	1.0188	1.01605	1.0284	0.999298	1.03082	1.02161	1.03727	1.0104	1.04559	1.03734	1.03394	1.01918		1.00884	1.02611	1.02332	1.01584	1.01759	1.02729	1.03052	1.01668	1.01145	1.01023	0.984901	1.02174		1.00384	1.0552	1.02969	1.03606	1.01151	1.05049	1.01361	1.02815	1.02911	1.03882
5.167	1.03713	1.03858	1.00326	1.01332	1.04083	1.05709	1.03048	1.04687	1.00775	1.01591		0.981938	1.034	1.03546	1.03336	1.03465	1.02496	1.02662	1.02892	1.02425	0.997932	1.06653	1.03854	1.04163	1.02201		1.00494	1.03191	1.02893	1.00901	1.01223	1.02082	1.03236	1.00284	1.01579	1.00421	0.991829	1.02494		1.00599	1.03849	1.02113	1.03742	1.02605	1.04053	1.01092	1.03264	1.03201	1.02648
5.2	1.04511	1.04059	1.0084	1.01357	1.0393	1.04337	1.0366	1.04624	1.00706	1.02957		0.994129	1.04419	1.01919	1.01906	1.02382	1.01156	1.04014	1.01882	1.03524	1.00039	1.06317	1.03153	1.03976	1.02658		1.0135	1.02738	1.03887	1.01412	1.02138	1.02225	1.03828	1.01991	1.01897	0.98757	0.998261	1.02946		1.01334		1.02953	1.04322	1.03185	1.06491	1.01013	1.0319	1.02695	1.03273
5.233	1.0442	1.02999	1.00605	0.990203	1.04343	1.03838	1.04867	1.04146	0.990818	1.02627		0.967844	1.03918	1.02665	1.03313	1.03543	1.02617	1.03181	1.01708	1.04318	1.0092	1.06931	1.03306	1.04202	1.04176		1.01698	1.03898	1.03671	1.02471	1.02319	1.01863	1.03068	1.03427	1.03039	1.00884	0.990863	1.00991		1.01062	1.03826	1.02991	1.03855	1.01934	1.05421	1.00767	1.03483	1.02462	1.04231
5.267	1.04374	1.04789	1.0002	0.996144	1.04253	1.03898	1.04211	1.04669	0.982698	1.02297		1.00385	1.03552	1.03046	1.02743	1.04705	1.02028	1.03734	1.03212	1.03625	1.01268	1.06947	1.04218	1.04443	1.02429		1.02638	1.02121	1.03057	1.02754	1.01643	1.01519	1.03698	1.02058	1.01183	0.998675	0.97437	1.0251		1.00486		1.02691	1.04065	1.01046	1.05851	1.0197	1.04821	1.02735	1.04012
5.3	1.04108	1.04013	1.00452	1.00667	1.04908	1.04502	1.0512	1.04254	0.994674	1.0433		1.00947	1.03074	1.0211	1.01755	1.02745	1.03312	1.03536	1.02957	1.03625	1.017	1.05606	1.04081	1.04179	1.02658		1.01901	1.00992	1.03042	1.02887	1.01824	1.01905	1.03882	1.03192	1.02286	0.995241	0.976703	1.01778		1.01549	1.0338	1.0256	1.03929	1.01008	1.04013	1.0159	1.03818	1.03144	1.03761
5.333	1.04953	1.04762	1.0002	1.02935	1.04558	1.04544	1.04465	1.04299	0.982698	1.02938		0.998372	1.04013	1.0165	1.02766	1.04152	1.03158	1.04583	1.02661	1.02915	1.02904	1.07046	1.0317	1.03526	1.02107		1.02902	1.01865	1.02339	1.02676	1.02516	1.01276	1.03844	1.02978	1.03264	0.993042	0.985632	1.01155		1.01086	1.02448	1.01912	1.02546	1.01189	1.05616	1.01534	1.05784	1.02679	1.04971
5.367	1.04659	1.05621	1.00128	1.01251	1.05276	1.02984	1.04465	1.03884	0.985857	1.03204		1.00025	1.02787	1.0207	1.01984	1.02398	1.01601	1.05819	1.03515	1.02383	0.993263	1.06375	1.02372	1.04334	1.02697		1.00901	1.02031	1.03005	1.02487	1.01807	1.02771	1.03491	1.01631	1.01936	1.00774	0.973804	1.0149			1.01632	1.01781	1.03052	1.0146	1.01763	1.02318	1.04625	1.04284	1.05562
5.4	1.04686	1.06215	0.995432	1.04333	1.04495	1.02648	1.06853	1.0419	1.00497	1.02673		1.01176	1.03384	1.02261	1.02174	1.04341	1.0269	1.05877	1.02562	1.03279	1.00836	1.06138	1.02912	1.04218	1.03303		1.00859	1.02957	1.0373	1.02244	1.01667	1.01981	1.03583	1.02662	1.00833	1.00758	0.982168	1.00703		1.00351	1.0137	1.03601	1.01636	1.0039	0.985399	1.02318	1.05213	1.04052	1.04329
5.433	1.04641	1.03968	1.00192	1.0335	1.02997	1.0352	1.04805	1.04037	1.00378	1.0411		1.00579	1.01481	1.0234	1.02331	1.03196	1.03569	1.04385	1.03672	1.02705	1.02412	1.06653	1.02622	1.05174	1.03059		1.00901	1.02919	1.02413	1.01256	1.02005	1.01655	1.04751	1.02095	1.02518	1.00985	0.977503	1.00758		1.00215	1.00847	1.03339	1.02529	1.02206	1.01156	1.02033	1.04014	1.04999	1.04661
5.467	1.05375	1.04388	0.999755	1.02898	1.04514	1.02166	1.04639	1.03559	0.995455	1.0389		1.00844	1.03727	1.0303	1.026	1.03347		1.04699	1.01831	1.02383	1.02539	1.06375	1.01864	1.0358	1.02413		1.01087	1.02158	1.02555	1.00729	1.02424	1.01981	1.04474	1.00409	1.01997	1.02267	0.982168	1.0012		1.00774		1.02298	1.03149	1.01551	1.00589	1.01652	1.04544	1.03683	1.03663
5.5	1.04154	1.04233	1.00083	1.03731	1.03499	1.0227	1.04805	1.0493	0.999023	1.03579		1.00862	1.02516	1.03293	1.02007	1.02146	1.03803	1.01082	1.0114	1.02054	1.03073	1.03455	1.02235	1.03954	1.03665		1.01477	1.03228	1.01059	1.01639	1.02943	1.02141	1.02301	1.0183	1.01756	1.02056	0.981202	0.994968		1.01526	1.00384	1.00964	0.996328	1.01551	1.0016	1.01692	1.03777	1.02422	1.04994
5.533	1.02537	1.04936	1.00344	1.02473	1.05726	1.03166	1.05269	1.04497	1.01309	1.02718		0.999748	1.02477	1.05245	1.01818	1.01515	1.03415	1.03965	1.01732	1.04174	1.01988	1.03471	1.01864	1.03674	1.02941		1.01986	1.02249	1.02249	1.01334		1.00378	1.0197	1.0272	1.03441	1.0251	0.977269	0.991935		1.00103	0.996218	1.01187	1.02022	1.01008	0.994956	1.01502	1.04487	1.02462	1.05092
5.567	1.05017	1.04297	1.00605	1.02924	1.05295	1.0177	1.04385	1.03757	1.01477	1.03864		1.00017	1.01593	1.03349	1.02583	1.03229	1.03997	1.03883	1.02644	1.0224	1.0209	1.07479	1.01711	1.05492	1.02351		1.03232	1.02723	1.03132	1.01389	1.02186	1.01755	1.02078	1.02131	1.02805	1.01603	0.9825	1.00097		1.00486	0.99006	1.01155	1.03655	1.01807	0.998443	1.02111	1.04095	1.02269	1.05092
5.6	1.03199	1.04762	0.999121	1.03075	1.04819	1.02623	1.04534	1.03081	1.01694	1.03689		1.00427	1.01649	1.04285	1.01896	1.02621	1.03649	1.02713	1.01198	1.03135	1.00741	1.06473	1.01421	1.04652	1.02713		1.02968	1.0258	1.02952	1.01577	1.02343	1.03293	1.028	1.02308	1.01833		0.986598	1.00984		1.00215	0.987669	1.01935	1.04042		0.99804	1.01557	1.03761	1.01531	1.04913
5.633	1.01959	1.06526	0.993456	1.02517	1.04908	1.02563	1.04446	1.03514	1.03942	1.0433		0.996675	0.995152	1.01722	1.03382	1.01191	1.01818	1.02416	1.00919	1.02586	1.02132	1.01344	1.00703		1.03091		1.0346	1.01706	1.02534	1.00501	1.02384	1.02872	1.01594	1.02168	1.02245	1.02619	0.987565	1.029		1.00391	0.968338	1.01248	1.03849	1.02801	0.995859	1.01826	1.0372	1.0471	1.04134
5.667	1.0229	1.06964	0.988871	1.02667	1.05016	1.02563	1.06537	1.03297	1.01625	1.04907		1.00717	1.00534	1.02984	1.03784	1.02241	1.02205	1.0174	1.02011	1.02586	1.02149	1.02228	1.00897	1.04987	1.01784		1.01926	1.02196	1.03528	1.02283	1.01568	1.01797	1.01594	1.02735	1.02097	1.02244	0.989097	1.01661		0.994075	0.983586	1.0121	1.03752	1.01136	0.995054	1.03164	1.02936	1.04846	1.05367
5.7	1.02336	1.05621	1.01515	1.03562	1.05644	1.01502	1.03563	1.03387	1.01219	1.04862		0.99445	1.01514	1.03349	1.02773	1.0213	1.01561	1.01938	1.00187	1.0224	1.02378	1.03258	1.01501	1.04388	1.0313		1.02765	1.02941	1.02788	1.02094	1.02046	1.02183	1.02539	1.01439	1.0146	1.0115	0.988531	1.02581		1.00159	0.970954	1.02436	1.03849	1.00865	0.986872	1.02665	1.03703	1.0454	1.04897
5.733	1.03089	1.03574	0.996698	1.03606	1.05034	1.03812	1.04744	1.01385	1.01793	1.04395		0.999997	1.01514	1.04325	1.00165	1.03007	1.02343	1.0315	1.02365	1.02646	1.0242	1.02235	1.01033	1.04552	1.02957		1.02723	1.02467	1.02967	1.01639	1.01865	1.01814	1.0343	1.01263	1.0101	1.02205	0.995294	1.01887		1.00023	0.970571	1.02327	1.04605	1.0112	0.971648	1.02341	1.03467	1.05392	1.04426
5.767	1.0218	1.05118	0.993456	1.01365	1.04927	1.02984	1.04298	1.03667	1.01051	1.04285		1.0012	1.01322	1.03944	1.01176	1.01963	1.02503	1.01477	1.02627	1.0175	1.03979	1.0235	1.02121	1.04514	1.03391		1.03035	1.01669	1.01688	1.02793	1.02458	1.01613	1.02892	1.01601	1.0101	1.01282	0.995059	1.03632		0.997119	0.976728	1.03368	1.03615	1.01339	0.930836	1.0356	1.04038	1.03746	1.0333
5.8	1.03043	1.03994	0.990399	1.02579	1.05079	1.03527	1.03012	1.03974	1.02199	1.04926		1.0012	1.00551	1.04269	1.01824	1.02533	1.00769	1.00983	1.03086	1.0273	1.03038	1.04542	1.0113	1.062	1.03736		1.01723	1.01669	1.02788	1.02566	1.01527	1.01571	1.03952	1.01174	1.0129	1.01885	0.986364	1.03694		1.00023	0.979662	1.02659	1.04275	1.01279	0.927183	1.02278	1.04943	1.03649	1.03663
5.833	1.03199	1.04414	0.998412	1.02216	1.06399	1.03216	1.02819		1.01694	1.0433		1.01127	0.999373	1.03293	1.01896	1.01087	1.00986	1.03464	1.02093	1.03254	1.03529	1.03455	1.01904	1.04366	1.03202		1.01842	1.02158	1.04591	1.01145	1.0226	1.01067	1.02654	1.01778	1.01943	1.01995	0.984998	1.02323		1.00695	0.999983		1.03439	1.02477	0.92628	1.02413	1.04038	1.03979	1.03387
5.867	1.02777	1.03711	1.00624	1.01038	1.05295	1.04552	1.02986	1.02124	1.02031	1.02563		1.00077	1.00128	1.03135	1.01651	1.01466	0.991546	1.01996	1.02035	1.02747	1.04758	1.02882	1.02469	1.0348	1.03123		1.01308	1.01451	1.03364	1.01694	1.01667	1.00681	1.0273	1.01623	1.03084	1.00541	0.975336	1.03733		0.988248	1.01469	1.00839	1.04935	1.01694	0.932919	1.02413	1.02284	1.04075	1.03209
5.9	1.03667	1.02322	1.00713	1.0149	1.05016	1.04241	1.03283	1.0391	1.02388	1.04816		1.00837	1.00224	1.03769	1.02371	1.03085	1.01865	1.03604	1.02273	1.04885	1.04411	1.03471	1.02542	1.02322	1.03202		1.01368	1.01195	1.03147	1.00957	1.01008	1.01025	1.03507	0.994222	1.01081	1.00596	0.977434	1.02923		0.999436	1.00091	1.00747	1.04975	1.02056	0.933489	1.02967		1.0345	1.04678
5.933	1.03998	1.02742	1.00497	1.02066	1.06983	1.03784	1.02925	1.02711	1.02654	1.03424		1.00589	1.00821	1.03102	1.01225	1.02287	1.01591	1.01733	1.03917	1.0169	1.04572	1.03021	1.01961	1.03751	1.02312		1.01571	1.00668	1.02915	1.02071	1.0091	1.01394	1.028	1.01071	1.00949	0.999547	0.972204	1.03639		0.994404	1.00253	1.01487	1.03905	1.02727	0.930572		1.0425	1.02406	1.02544
5.967	1.02473	1.03911	0.998859	1.00994	1.05752	1.03827	1.03048	1.03955	1.03823	1.03754		0.999324	1.00653	1.02737	1.0113	1.02454	1.00769	1.02211	1.02964	1.00819	1.0486	1.03021	1.02702	1.03658	1.02241		1.00361	1.00849	1.02952	1.02071	1.02063	0.999748	1.03023	0.999372	1.0028	1.00314	0.9825	1.03171		0.989207	1.0241	1.00523	1.04259	1.02817	0.917292	1.01518	1.03402	1.04268	1.03875
6	1.03823	1.03363	0.997779	1.01721	1.03175	1.0362	1.0408	1.03477	1.02437	1.04881		0.999324	0.995548	1.02912	1.00846	1.01561	0.998163	1.03266	1.03859	1.01141	1.03343	1.01524	1.01284	1.03828	1.02146		0.998692	1.01466	1.03438	1.01373	1.00828	1.00663	1.03892	0.998123	0.994022	0.999936	0.971237	1.03187		0.995761	1.04097	1.0212	1.03479	1.02455	0.943449	1.02088		1.03337	1.02974
6.033	1.0396	1.03299	1.00516	1.01145	1.05644	1.03827	1.02374	1.04587		1.03204		1.01127	1.01068	1.03927	1.01628	1.0145	1.00575	1.02904	1.03876	1.01834	1.03428	1.0091	1.00373	1.03735	1.02886		1.00522	1.01211	1.02825	1.02566	1.00234	1.01049	1.02985	1.00504	1.00582	1.00525	0.984832	1.01707		0.992087	1.0382	1.01618	1.02312	1.02621	0.955992	1.02341	1.03027	1.02679	1.02601
6.067	1.03252	1.03957	0.99994	1.01739	1.05429	1.03474	1.02077	1.03369	1.02338	1.0411			1.0063	1.03007	0.999292	1.0055	1.00535	1.02607	1.03318	1.01715	1.01503	1.01008	1.00453	1.02702	1.03208		1.01547	1.01008	1.03835	1.02699	1.0152	1.00663	1.03538	0.997087	1.01087	1.00376	0.980967	1.01629		0.995364	1.04304	1.00223	1.01089	1.01838	0.923029	1.02397	1.0448	1.03201	1.03128
6.1	1.02324	1.0244	0.995803	1.0219	1.06615	1.03809	1.01971	1.03585	1.02913	1.04706		1.00632	1.00854	1.03332	1.00973	1.00645	0.996793	1.01395	1.05955	1.01124	1.01037	1.01917	1.01678	1.03284	1.03248		1.02487	1.00465	1.03692	1.01922	1.01462	1.0099	1.01756	1.00334	1.00396	1.0036	0.9825	1.02042		0.978979	1.04304	1.01982	1.02682	1.02652	0.962868	1.01367		1.04324	1.02187
6.133	1.035	1.04267	1.00165	1.01482	1.06139	1.02767	1.03258	1.02719	1.02457	1.03113		1.00445	1.0126	1.02428	1.00577	1.00266	0.994052	1.03365	1.04369	1.0098	1.01282	1.01679	1.00783	1.02515	1.03137		1.0208	1.00955	1.02555	1.02094	1.00746	1.00663	1.01664	1.01056		1.00437	0.969705	1.00274		0.987452	1.04081	1.00609	1.03012	1.02199	0.941809	1.01518	1.0452	1.04597	1.02365
6.167	1.03702	1.02239	1.02055	1.00631	1.06317	1.02974	1.01805	1.03567		1.03579		1.01042	0.996272	1.02373	1.01153	1.00131	1.00906	1.00597	1.02784	1.00651	1.01402	1.03045	1.01467	1.00922	1.02909		1.02673	1.01008	1.02571	1.01317	1.00606	1.01554	1.01072	1.02247	1.00598	1.00421	0.98733	1.01287		0.990496	1.02965	1.00517	1.02989	1.0122	0.947476	1.01495	1.04088	1.01828	1.02974
6.2	1.04032	1.03299	1.01533	1.0095	1.05124	1.03009	1.01761	1.04045	1.01625	1.02984		1.00854	0.975727	1.02333	1.01477	1.00573	0.998731	1.00358	1.04386	1.01446	1.02834	1.01147	1.01234	1.00433	1.02074		1.03182	1.02137	1.04321	1.01168	1.00606	1.01209	1.00051	1.00135	1.00451	1.0046	0.970837	1.03507		0.997681	1.02671	1.01034	1.02409	1.02162	0.947476	1.03039	1.03892	1.02389	1.03112
6.233	1.0326	1.0191	1.01686	1.01482	1.06049	1.03552	1.0212	1.04829	1.04557	1.05082		1.0077	0.99548	1.01143	1.00947	1.01411	1.00204	0.99798	1.04839	1.00508	0.99892	1.01622	1.01257	1.0051	1.03326		1.04656	1.01014	1.04972	1.01945	1.0339	1.01049	1.00942	1.01254	1.00412	0.995536	0.980333	1.03016		1.00847	1.02987	0.998076	1.00913	1.0131	0.941073	1.02675		1.03127	1.02917
6.267	1.02553	1.0253	1.01011	1.00737	1.05429	1.04862	1.01656	1.0409	1.0315	1.03424		1.01716	1.02183		1.01729	1.02421	0.986868	1.01009	1.04148	1.01218	0.999516	1.01147	1.00984	1.01225	1.02114		1.0308	1.01722	1.0468	1.01639	1.01561	1.00681	1.0118	1.01181	1.00521	0.990292	0.978166	1.02019		1.00983	1.03919	1.01056	1.01766	1.01566	0.9622	1.02406	1.03966	1.01867	1.03834
6.3	1.0315	1.00877	1.00885	1.00268	1.04235	1.04302	1.02146	1.04505	1.04586	1.04221		1.01632	1.01243	1.03214	1.01098	1.0002	0.988003	0.999139	1.04781	1.00263	0.993336	1.01801	1.00169	1.01807	1.01752		1.03631	1.01978	1.04321	1.01223	1.02888	1.01025	1.0168	0.997605	1.00576	0.993108	0.974067	1.01568		1.00016	1.04458	1.01951	1.04092	1.00783	0.959047	1.03134	1.04186	1.01538	1.0256
6.333	1.02195	1.02357	1.0084	1.01056	1.04603	1.0457	1.02225	1.04766	1.04061	1.03268		1.00847	1.00455	1.03428	1.00623	1.02572	0.991076	1.00409	1.04008	1.00609	1.00952	1.03953	1.01588	1.00175	1.02531		1.02343		1.05077	1.0291	1.01397	1.00764	1.03178	1.01873	0.998458	0.981226	0.975199	1.01607		1.00367	1.03995	1.02998	1.02522	1.0229	0.950629	1.01836		1.02197	1.05263
6.367	1.03618		1.01209	1.01783	1.05681	1.04527	1.02374	1.04505	1.03319	1.03625		1.02331	1.01609	1.05173	1.01975	1.00534	0.99228	1.02576	1.03236	1.00424	1.00341	1.03478	1.00927		1.0228		1.02733	1.01579	1.04374	1.01961	1.01776	1.00562	1.01658	1.01924	1.01174	0.974587	0.972066	1.02978		1.00559	1.03086	1.01919	1.03085	1.02162	0.960353	1.01931	1.0377	1.04155	1.03461
6.4	1.04013	1.01471	1.003	1.01269	1.04945	1.04295	1.01866	1.05046		1.04422		1.01511	1.00686	1.04522	1.01818	1.00249	0.980985	0.9975	1.03508	1.01361	1.01384	1.02652	1.01354	1.00417	1.03153		1.02775	1.01254	1.04426	1.01129	1.01957	1.00076	1.02733	1.00717	0.993729	0.977632	0.967967	1.01381		1.01039	1.02863	1.03091	1.03358	1.02199	0.962062	1.0178	1.04774	1.03713	1.04833
6.433	1.04592	1.02065	1.003	1.02898	1.05097	1.03027	1.04098	1.04306	1.02338	1.04551		1.00854	1.01497	1.05958	1.01706	1.01639	0.967752	1.0204	1.03984	1.00914	0.996884	1.02218	1.01007	1.01791	1.01807		1.02902	1.02181	1.04464	1.01035	1.02212	1.00479	1.03847	1.00644	0.998392	0.985142	0.971832	1.02168		1.00175	1.03887	1.02481	1.03882	1.0073	0.951866	1.01551	1.04716	1.02652	1.04248
6.467	1.04105		1.00147	1.01933	1.05871	1.03716	1.03232	1.0437	1.03724	1.04285		1.01307	1.01115	1.04404	1.01003	1.01751	0.980584	1.01323	1.04321	0.992238	1.013	1.03184	1.02683	0.996541	1.02563		1.02351	1.02399	1.03633	1.01961	1.03045	1.01873	1.03847	1.01248	0.998778	0.999519	0.972964	1.02455		0.997914	1.03718	1.0319	1.04718	1.01747	0.944991	1.02809	1.03909	1.03816	1.05068
6.5	1.04573	1.02311	1.00344	1.02359	1.04622	1.02888	1.02874	1.03783		1.03268		1.02084	1.00597	1.04824	1.02796	1.02778	0.966949	1.02139		0.989615	1.0091	1.01588	1.02112	1.01209	1.00572		1.02596	1.01856	1.03454		1.02649	1.02739	1.03977	1.00681	1.00926	1.0014	0.962102	1.00181		1.00526	1.03163	1.02558	1.06271	1.01491	0.949283	1.0197	1.02808	1.03952	1.04849
6.533	1.05079	1.0138	1.00471	1.02572	1.05421	1.04052	1.03714	1.04306	1.021	1.03158		1.01222	1.00637	1.03237	1.01153	1.0074	0.997526	1.02996	1.03188	0.995528	1.01198	1.04051	1.02175	1.0033	1.02814		1.02554	1.02037	1.04553	1.02039	1.02311	1.01832	1.03793	1.01446	1.01656	1.00859	0.965801	1.02213		0.999833	1.04388	1.05064	1.05765	1.02003	0.94281	1.02429	1.03338	1.03647	1.05888
6.567	1.03728	1.00585	0.990399	1.01739	1.04793	1.03345	1.04055	1.04262	1.03011	1.02654		1.00974	1.01385	1.03713	1.00663	1.0213	0.994218	1.01965	1.0327	1.00449	1.01869	1.01073	1.02112	1.01231	1.0213		1.02902	1.02692	1.03745		1.02451		1.03831	1.00967	1.02029	0.989125	0.946175	1.0261		1.01311	1.04519	1.04787	1.05628	1.01785	0.947672	1.0197	1.04105	1.03125	1.04362
6.6	1.05014	1.01115	0.992113	1.02102	1.06113	1.03802	1.04877	1.05091	1.03417	1.03314		1.00787	1.01019	1.03904	1.01935	1.0179	1.00067	1.01685	1.03467	1.02306	1.00496	1.02235	1.01781	1.00594	1.02192		1.02859	1.02218	1.0447	1.0094	1.01776	1.00538	1.04515	1.00806	1.0119	1.00007	0.944643	1.01216		0.996159	1.04257	1.03244	1.06215	1.01279	0.94006	1.01567	1.04243	1.04538	1.02853
6.633	1.0404	1.01728	0.997779	1.02227	1.05547	1.01699	1.04982	1.04938	1.03319	1.03094		1.01649	1.01903	1.04785	1.00963	1.01885	1.00785	1.02641	1.0295	1.0316	1.00843	0.997553	1.02829	1.01939	1.02058		1.02835	1.02255	1.04089	1.01623	1.01957	1.01327	1.03808	1.01092		1.0114	0.945043	1.02907		1.00831	1.00521	1.03222	1.06038	1.02221	0.942171	1.02999	1.03672	1.04634	1.02342
6.667	1.03709	1.01929	1.00516	0.999336	1.05287	1.02863	1.0437	1.02737	1.03536	1.03003		1.01384	0.990602	1.02215	1.00774	1.00936	1.00769	1.02344	1.03287	1.02282	1.01496	1.01646	1.02305	1.01527	1.03687		1.0108	1.03144	1.03513	1.024	1.02015	1.02906	1.05307	1.00791	1.01865	1.01649	0.955173	1.02416		1.00599	1.00745	1.03506	1.04348	1.01204	0.952534	1.0277		1.04248	1.03673
6.7	1.03085	1.01664	1.00363	1.03334	1.06194	1.03863	1.0437	1.03783	1.01793	1.02938		1.02391	0.994823	1.03286	1.01841	1.01316	1.00244	1.02781	1.02416	1.02103	1.01514	1.01056	1.02716	1.02313	1.03231		1.02445	1.02564	1.04238	1.01623	1.0339	1.02579	1.04177		1.01711	1.01571	0.934016	1.02713		1.00864	1.01207	1.05119	1.04798	1.01859	0.944519	1.03173	1.03379	1.04016	1.02399
6.733	1.02599	1.02367	1.00579	1.00465	1.05674	1.05087	1.04982	1.03522	1.04397	1.05108		1.02289	1.00191	1.03572	1.02701	1.016	1.00825	1.02327	1.0313	1.03912	1.027	1.01588	1.02402	1.00494	1.01045		1.02428	1.02549	1.04523	1.01873	1.01223	1.02924	1.04493	1.0051	1.00833	1.00062	0.935782	1.03032		1.01598	1.00537	1.038	1.05555	1.02131	0.954714	1.03537	1.03477	1.0477	1.02594
6.767	1.03397	1.02523	1.01444	0.98411	1.04874	1.05734	1.0437	1.03107	1.03417	1.04046		1.02024	1.00175	1.04413	1.00852	1.00707	1.01019	1.01313	1.02695		1.02149	0.998297	1.03063	1.01769	0.997378		1.02631	1.02857	1.03386	1.02501	1.02854	1.02033	1.04454		1.02402	1.00398	0.926052	1.03126		0.995926	0.998292	1.03391	1.05691	1.01988	0.948477	1.02619	1.03574	1.02506	1.0218
6.8	1.02112	1.02303	1.0201	1.0121	1.04766	1.0482	1.04711	1.03892	1.02962	1.03689		1.01776	1.00637	1.03572	1.01896	1.0006	1.00882	1.02088	1.02021	1.02569	1.02455	1.01171	1.03006	1.02258	1.0154		1.02936	1.02224	1.03513	1.02924	1.02854	1.02378	1.04139	0.994802	1.0165	0.998902	0.93868	0.999485		1.01175	0.999441	1.04339	1.05458	1.01913		1.02754	1.03379	1.04385	1.01905
6.833	1.0291	1.02833	1.02551	1.02043	1.05566	1.04277	1.04562	1.03369	1.0313	1.02388		1.01017	1.01098	1.03358	0.999847	1.00249	1.00591	1.02344	1.02933	1.04325	1.0237	1.00714	1.02596	1.03307	1.01367		1.02758	1.02707	1.04814	1.03301	1.02714	1.01873	1.04009	1.00702	1.02138	1.00062	0.946478	1.02916		1.01039	0.986585	1.03745	1.05418	1.02168	0.953909	1.0201	1.03338	1.03397
6.867	1.03838	1.03893	1.02487	1.02938	1.06302	1.0357	1.04859	1.03981	1.03516	1.03204		1.01511	0.990438	1.05389	1.00521	1.01221	0.995021	1.0189	1.01922	1.02019	1.01837	1.01188	1.02516	1.02483	1.00233		1.02673	1.02143	1.03894	1.02052	1.02434	1.02562	1.01451	1.01681	1.03	1.00609	0.959672	1.02971		1.0052	0.988977	1.02072	1.04758	1.00044	0.945894	1.02183	1.02808	1.04192	1.01767
6.9	1.02865	1.03472	1.02595	1.02362	1.06131	1.0488	1.03783	1.03089	1.04249	1.02874		1.02109	1.02404	1.05199	1.02118	1.00818	1.00187	1.0274	1.03171	1.02324	1.02676	1.0235			1.01178		1.03326	1.01014	1.04507	1.01653	1.01957	1.02562	1.01451	1.01607	1.01859	1.00554	0.963537	1.03477		1.00496	0.992518	1.01794	1.05708	1.00752	0.94663	1.02397	1.03966	1.02506	1.00647
6.933	1.02956	1.03408	1.0229	1.02167	1.06257	1.02345	1.04921	1.02872	1.03388	1.03249		1.03713	1.01194	1.05008	1.017	1.01182	0.999367	1.01092	1.03015	1.01572	1.02023	1.01107	1.01057	1.0305	1.01484		1.03835	1.00578	1.04507	1.02124	1.00705	1.02663	1.0258	1.01873	1.01035	1.01062	0.983728	1.03252		1.00887	0.994368	1.02966	1.05128	1.01476	0.948575	1.02262	1.02727	1.02795	1.02019
6.967	1.03664	1.03299	1.0264	1.01742	1.05718	1.03259	1.0429	1.02764	1.02695	1.03845		1.03798	1.01728	1.06079	1.02956	1.0021	0.99783	1.0288	1.02283	1.03363	1.01531	1.01639	1.01968	1.03252	1.01367		1.0408	1.02121	1.04665	1.01935	0.998654	1.02277	1.0321	1.01357	1.01727	1.01649	0.998924	1.02574		1.00927	0.988977	1.02928		1.01769	0.948575	1.03085	1.0377	1.01752	1.00802
7	1.04371	1.02194	1.01947	1.00741	1.07083	1.02156	1.05533	1.02872	1.032	1.02453		1.03508	1.01003	1.04167	1.01929	0.996802	0.998398	1.02542	1.00476	1.0169	1.01268	1.01761	1.02822	1.03182	1.02413		1.03445	1.01993	1.03513	1.01214	1.01397	1.01891	1.03287	1.00629	1.0137	1.0082	0.984763	1.01616		1.00831	0.99191	1.02481	1.06215	1.02786	0.945255	1.02302	1.01936	1.01422	1.02076
7.033	1.03489	1.03052	1.02532	1.0245	1.06194	1.02259	1.04964	1.02827	1.03031	1.02783		1.02356	1.00581	1.04666	1.00917	1.02634	0.997664	1.02262	1.01667	1.02257	1.02311	1.01049	1.02435	1.03648	1.02185		1.03115	1.02829	1.03692	1.02517	0.996096	1.0163	1.02879	1.00909	1.01052	1.01461	0.991195	1.03345		1.01582	0.990985	1.01494	1.04798	1.00843	0.942741	1.01367	1.02466	1.01479	1.01353
7.067	1.03534	1.018	1.03251	1.02857	1.05674	1.02923	1.04624	1.02349	1.04368	1.01591		1.00854	1.01774		1.02537	1.00027	1.00702	1.01685	1.01691	1.00585	1.01531	1.01761	1.02395	1.05032	1.01784		1.02378	1.01285	1.02159	1.01873	1.01356	1.01345	1.0258	1.02189	1.01781	1.02063	0.976868	1.02668		1.02006	0.99491	1.00954	1.05442	1.02477	0.941366	1.02895	1.01879	1.00804	1.01726
7.1	1.02762	1.00786	1.01209	1.0354	1.07406	1.01691	1.0479	1.01826	1.032	1.03204		1.01819	0.992187	1.05143	1.0132	1.0212	0.996529	1.0133	1.01569	1.00854	1.02065	1.02194	1.0117	1.04659	1.00344		1.03259	1.0161	1.01635	1.01324	1.00879	1.01001	1.01766	1.01107	1.03373	1.00726	0.989097	1.02613		1.01582		1.02158	1.04412	1.0293	0.943782	1.02134	1.03885	1.00531	1.02846
7.133	1.02762	1.02924	1.02577	1.0307	1.06778	1.01813	1.04265	1.0187	1.02863	1.03799		1.02006	1.01488	1.04397	1.01778	1.02578	1.00024	1.01784	1.02858	1.01893	1.01861	1.02709	1.0117		1.00477		1.03607	1.00503	1.02181	1.0229	1.01653	1.02218	1.0182	1.00254	1.02682	1.00234	0.989663	1.02784		1.01294	0.994143	1.02436		1.0146	0.957298	1.02688	1.03943	0.999296	1.03609
7.167	1.03516	1.01626	1.01146	1.02769	1.06975	1.03562	1.03399	1.02827	1.04081	1.02938		1.03218	1.02371		1.04157	1.03171	1.00709	1.01627	1.02858	1.02544	1.01777	1.02039	1.00646	1.0333	1.02335		1.02378	1.01173	1.02181	1.02462	1.02666	1.01933	1.02434	1.01269	1.01913	1.00344	0.990463	1.03384		1.02661	1.00786	1.01989	1.04628	1.01604	0.948547	1.01564	1.02466	1.00628	1.02042
7.2	1.03957	1.0295	1.01533	1.04761	1.06213	1.02666	1.03845	1.04045	1.02982	1.03003		1.02126	1.02332	1.04896	1.017	1.0336	1.02009	1.01528	1.03746	1.02849	1.01454	1.02039	1.00082	1.04923	1.00934		1.02666	1.00284	1.02562	1.01763	1.0209	1.02461	1.03003	1.01623	1.00096	0.98702	0.992961	1.03671		1.01926	0.993377	1.02806	1.04725	1.01363	0.94506	1.01604	1.03372	1.02603	1.03219
7.233	1.03911	1.03745	1.01228	1.02945	1.06841	1.02459	1.04309	1.0409	1.0313	1.03094		1.02791	1.01145	1.04262	1.03509	1.02065	1.01484	1.01726	1.03195	1.02604	1.0243		1.0076	1.04511	1.01634		1.0314	1.00992	1.02816	1.02917	1.01851	1.02865	1.04232	1.00967	1.0182	1.00619	0.992161	1.02261		1.02774	0.996918	1.02113	1.02995	1.02914	0.941101	1.02521	1.02703	1.02988	1.02473
7.267	1.02781	1.0359	1.01011	1.03503	1.07577	1.03716	1.04055	1.03133	1.03724	1.03003		1.02006	1.03351	1.04262	1.02079	1.01211	1.02614	1.026	1.02834	1.0246	1.00657	1.02194	1.01614		1.01312		1.0181	1.00811	1.02689	1.02784	1.01991	1.02016	1.03471	1.00952	1.01611	0.989608	0.988862	1.02581		1.00672	0.980745	1.03116	1.04025	1.01566	0.944824	1.02807	1.02645	1.02579	1.03787
7.3	1.03534	1.03261	1.00642	1.02777	1.0641	1.04734	1.05069	1.0261	1.04418	1.02407		1.01964	1.01959	1.05278	1.02711	1.02863	1.02129	1.01033	1.02497	1.0197	1.00411	1.00477	1.02525	1.04527	1.01556		1.01487	1.02031	1.02277	1.02501	1.00739	1.01001	1.02135	1.01763	1.01913	0.990386	0.996826	1.02939		1.02095	0.972738	1.02615	1.03309	1.02078	0.944254	1.01968	1.02645	1.02659	1.03374
7.333	1.03158	1.0317	1.00642	1.02263	1.06625	1.0338	1.04921	1.03567	1.02724	1.02407		1.01511	0.996572	1.05619	1.02181	1.03036	1.02106	1.01272	1.02596	1.03195	1.01784	1.01466		1.04472	1.02485		1.02361	1.01148	1.01918	1.02673	1.01892	1.0179	1.02803	1.00931	1.02177	0.970765	0.995625	1.02845		1.01439	0.97982	1.00734	1.04162	1.01279	0.933892	0.99696	1.01723	1.03936	1.02943
7.367	1.02405	1.02621	1.00337	1.02733	1.06886	1.03984	1.03801	1.05263	1.05517	1.03204		1.02006	1.02206	1.05642	1.03287	1.00809	1.03429	1.01272	1.02555	1.01361	1.02767	0.999279	1.03573	1.03874	1.01439		1.01877		1.02209	1.03089	1.0181	1.0179	1.02526	1.01388	1.01074	0.980998	0.978166	1.02074		1.00208	0.980904	1.03039	1.04725	1.00805	0.945393	1.01587	1.02156	1.03454	1.0214
7.4	1.01762	1.03261	0.998149	1.02626	1.06778	1.03423	1.03566	1.0261	1.04754	1.03204		1.02748	1.00812	1.04952	1.03477	1.00714	1.03098	1.02542	1.03032	1.0197	1.01005	1.01547	1.03009	1.04923	1.01422		1.01284	1.0142	1.01611	0.99699	1.03952	1.02277	1.04101	1.00343	1.02441	0.982165	0.988862	1.03407		1.0287	0.988369	1.0287	1.04355	1.00843	0.945963	1.01991	1.02017	1.03045	1.03414
7.433	1.03002	1.01982	0.998149	1.0376	1.06213	1.03295	1.04221	1.02954	1.05992	1.01125		1.01844	1.03113	1.04818	1.02812	1.02065	1.03001	1.03218	1.02753	1.01953		1.00975	1.04137	1.04138	1.01722		1.01547		1.02203	1.02273	1.01926	1.01268	1.02949	1.01342	1.0109	0.988414	0.995459	1.03803		1.01966	0.97258	1.01806	1.04218	1.00986	0.93842	1.01666	1.02	1.03221	1.03179
7.467	1.02138	1.00438	1.00534	1.02458	1.06733	1.02441	1.03924	1.0326	1.05398	1.02206		1.03243	1.01376	1.04492	1.02544	1.02238		1.02798	1.02375	1.02054	1.00555	1.01653	1.04081	1.04006	1.00943		1.01996	0.992432	1.03287	1.03788	1.01448	1.01327	1.02096	1.01696	1.01074	1.02633	0.991595	0.998001		1.01982	0.960106	1.01414	1.04998	1.02025	0.936878	1.0203	1.01429	1.01399	1.02651
7.5	1.02378	1.02156	1.00184	1.02777	1.06518	1.02545	1.04939	1.0289	1.03774	1.00465		1.02466	1.03064	1.05738	1.01841	1.0197	1.03566	1.0218	1.02317	1.01911	1.01106	1.03248		1.04604	1.01211		1.0114	0.990624	1.02711	1.01935		1.01689	1.0245	1.03277	1.01595	1.01163	0.998992	1.0339		1.02678	0.976821	1.02123	1.05328	1.01626	0.94724	1.02354	1.01984	1.01535	1.01279
7.533	1.01165	1.0211	1.00706	1.02608	1.06473	1.02709	1.03294	1.01609	1.0614	1.02874		1.02218	1.00858	1.05317	1.02583	1.02144	1.02808	1.02139	1.02572	1.02722	1.00208	1.00131	1.04411	1.0455	1.00148		1.02045	0.999136	1.03429	1.02312	1.02304	1.01286	1.01874	1.01946	1.01891	1.00748	0.986764	1.02471		1.0239	0.962339	1.03164	1.04419	1.01573	0.957033	1.02315	1.01527	1.01728	1.02765
7.567	1.01762	1.0264	0.996436	1.02608	1.06778	1.03027	1.02489	1.01411	1.04249	1.02388		1.01911	1.0128	1.04016	1.03349	1.01931	1.0129	1.02494	1.02967	1.02604	1.00292	1.00663	1.05733	1.04868	1.00738		1.01723		1.03519	1.02823	1.0153	1.01588	1.02634	1.02616	1.01052	1.01827	0.993596	1.0311		1.02813	0.975896	1.03272	1.04748	1.01557	0.967396	1.01381	1.03477	1.00195
7.6	1.0156	1.03499	1.00426	1.02263	1.0693	1.02509	1.02428	1.03133	1.04467	1.01371		1.02056	1.0222	1.05373	1.03159	1.02215	1.03138	1.03548	1.03106	1.03254	1.01191	1.03641	1.04548	1.03858	1.02328		1.02028	0.989501	1.03968	1.02407	1.02345	1.02277	1.0308	1.00343	1.01106	1.01616	0.992464	1.02378		1.0235	0.985753	1.03125	1.03799	1.01248	0.950227	1.01437	1.00899	1.02582	1.02765
7.633	1.03416	1.02201	1.00579	1.02582	1.05889	1.03345	1.03399	1.01239	1.04467	1.02012		0.996675	1.01217	1.0415	1.03768	1.02997	1.0246	1.02098	1.02967	1.02628	1.01005	1.02283	1.05636	1.04814	1.01494		1.01147		1.03228	1.01857	1.03737	1.02621	1.0321	1.02866	1.01611	1.02351	0.998261	1.03165		1.01694	0.977204	1.021	1.05079	1.021	0.937183	1.02141	1.01902	1.02725
7.667	1.01111	1.02595	1.00561	1.02113	1.06213	1.03474	1.03145	1.00716	1.0525	1.02123		1.02791	1.02101	1.05777	1.03009	1.03795	1.02169	1.02197	1.02055	1.03583	1.01064	1.03895		1.03594	1.01022		1.01494	0.977682	1.03662	1.02368	1.02008	1.01428	1.03748	1.01888	1.00206	1.0103	0.986032	1.02603		1.02909		1.01468	1.03855	1.02537	0.941073	1.01358	1.01274	1.02443	1.02197
7.7	1.01332	1.00922	1.00713	1.03202	1.05216	1.04784	1.03653	1.01411	1.04299	0.997134		1.02321	1.01026	1.04515	1.02701	1.02991	1.02266	1.02569	1.01119	1.03541	1.00369	1.00172	1.05482	1.03159	1.00676		1.02494	0.970074	1.0328	1.01591	1.02601	1.02378	1.02342	1.02771	1.00524	1.01046	0.998827	1.036		1.02294	0.978512	1.0156	1.04089	1.0424	0.941073	1.00289	1.01609	1.04394	1.02116
7.733	1.02104	1.01233	1.01235	1.03202	1.05476	1.01645	1.03145	1.02439	1.04012	1.03359		1.01886	1.00851	1.03999	1.02188	1.04436	1.01725	1.02395	0.990739	1.02992	0.995299	1.00924	1.05346	1.05615	1.00086		1.02902	0.951332	1.0337	1.03161	1.02025	1.01261	1.02488	1.03536	1.01386	1.01234	0.999793	1.01232		1.01598	0.986136	1.01691	1.05385	1.03516	0.951769	1.0086	1.01494	1.03727	1.01118
7.767	1.0113	1.02311	1.01541	1.02582	1.05413	1.04327	1.02156	1.02195	1.02437	1.03515		1.01911	1.00422	1.05031	1.02868	1.01253	1.02363	1.00665	1.00125	1.01851	0.991155	1.00924	1.05346	1.05785	0.993302		1.02105	0.961653	1.03423	1.0214	1.02403	1.00841	1.01543	1.00586	1.00524	1.02063		1.01458		1.0287	0.982595	1.03441	1.04748	1.03787	0.949657	1.01263	1.0173	1.0359	1.02271
7.8	1.02104	1.02027	1.01712	1.02476	1.05045	1.02974	1.02348	1.02042	1.04131	1.03075		1.01724	0.99832	1.05015	1.03974	1.01728	1.02614	1.01241	1.00956	1.01809	0.990137	1.00768	1.04685	1.05203	1.00086		1.02375	0.943815	1.0355	1.032	1.02205	1.01731	1.02841	1.0325	1.01067	1.02251	1.00116	1.0191		1.02678	0.98907	1.02269	1.04845	1.02371	0.931918	1.01223	1.01551	1.03301	1.02977
7.833	1.02389	1.01342	1.01433	1.03584	1.07317	1.04241	1.02645	1.02954	1.03606	1.02232		1.01102	1.01329	1.03999	1.02907	1.0108	1.00435	1.02412	1.00717	1.03237	1.01201	1.01537	1.04274	1.06593	0.991966		1.02351	0.91837	1.03581	1.02972	1.02164	1.01286	1.01689	1.02043	1.01572	0.988348	1.00286	1.00968		1.02198	0.984828	1.02346	1.03252	1.01882	0.940739	0.998305	1.03109	1.0355	1.02977
7.867	1.02545	1.02092	1.02018	1.02707	1.0606	1.03552	1.02077	1.03585	1.05131	1.02232		1.00879	1.01273	1.03063	1.03058	1.01917	1.01404	1.01159	0.994277	1.02096	0.995649	1.013	1.06063	1.05	0.998809		1.01944	0.901282	1.03872	1.02823	1.01571	1.00841	1.00728	1.02375	1.01688	1.01344	1.01235	1.01739		1.01758	0.963489	1.01992	1.03269	1.04028	0.949893	1.00709	1.03149	1.03181	1.02035
7.9	1.02168	1.03938	1.02405	1.01661	1.05863	1.04655	1.0233	1.02087	1.04131	1.02434		1.01681	1.01273	1.03388	1.02979		1.02146	1.00682	1.00217	1.02054	1.0026	1.01341	1.05829	1.05039	1.00793		1.03088	0.919274	1.03259	1.02257	1.01274	1.01529	1.01451	1.01153	1.02084	1.02477	1.02055	1.01607		1.00831		1.00935	1.02666	1.03441	0.948921	1.0203	1.02774	1.03221	1.02604
7.933	1.02214	1.0244	1.02603	1.01511	1.05261	1.02724	1.03914	1.0252	1.03269	1.03249		1.01102	1.02022	1.03904	1.02963	1.02241	1.0125	1.03064	0.995264	1.01505	0.997263	1.03746	1.04798	1.05637	1.0066		1.01757	0.905557		1.02696	1.00995	1.01067	1.01212	1.02073	1.02775	1.0125	1.02072	1.011		1.01198	0.946232	0.986833	1.01499	1.02989	0.965117	1.01935	1.02798	1.0229	1.0219
7.967	1.01994	1.02943	1.0147	1.01298	1.05647	1.03284	1.01298	1.02259	1.03368	1.02764		1.01964	1.01138	1.03349	1.02734	1.02794	1.00315	1.00566	1.00438	1.01606	1.00973	1.00606	1.03904	1.0417	1.00399		1.02452	0.938455	1.03237	1.02485	1.01793	1.00816	1.02249	1.02537	1.02216	1.02532	1.00472	1.0251		1.02062	0.967413	0.980894	1.02915	1.02499	0.963575	1.03026	1.03271	1.04361	1.02035
8	1.02747	1.02742	1.01533	0.985796	1.0606	1.02863	1.02225	1.02845	1.03536	1.02187		1.01204	1.01504	1.02889	1.02505	1.03386	1.00839	1.00129	1.0071	1.00221	1.00014	1.03943	1.0363	1.05225	1.01501		1.01901	0.968111	1.03887	1.03034	1.0181	1.02405	1.01527	1.00991			1.00182	1.02533		1.0096	0.970954	0.997627	1.01362	1.03516	0.962367	1.02282	1.03524	1.01632	1.01938
8.033	1.04207	1.02878	1.00795	0.991191	1.05261	1.00949	1.02077	1.03522	1.032	1.02938		1.01681	0.986381	1.02412	1.035	1.04665	1.00702	1.0162	1.00118	0.997311	0.997263	1.02896	1.03727	1.04231	1.01178		1.02656		1.03057	1.03128	1.02049	0.999604	1.02342	1.01601	1.02589	1.01797	1.01275	1.01894		1.02717	0.96518	0.996159	1.00509	1.04096	0.95338	1.01745	1.03663	1.03879	1.01743
8.067	1.03234	1.04002	1.01011	0.996692	1.05737	1.03234	1.03512	1.02322		1.03048		1.02236	0.990438	1.02143		1.0232	1.00839	1.00566	1.00217	1.00543	1.00074	1.02225	1.0363	1.04643	1.0065		1.01164	0.977372	1.03327	1.0239	1.01653	0.999258	1.02011	1.02485	1.01711	1.01273	0.995294	1.01349		1.02277	0.990827	1.00472	1.01362	1.03607	0.948449	1.01745	1.03761	1.02619	1.0292
8.1	1.03876	1.03143	1.00687	1.00997	1.07246	1.01052	1.01595	1.03089	1.0418	1.02517		1.01929	1.00191	1.00841	1.02204	1.02454	1.01324	1.00071	0.994446	0.99605	1.01285	1.02005	1.02775	1.04845	1.00989		1.01817		1.02952	1.02013	1.01612	0.999676	1.02733	1.01241	1.01936	1.02251	1.00149	1.01442		1.02837	0.968721	0.996926	1.03229	1.03878	0.965382	1.02925	1.03581	1.02114	1.01215
8.133	1.03344	1.03673	1.0138	1.0121	1.07012	0.992848	1.01743	1.02367	1.04368	1.03799		1.02628	1.00755	1.02317	1.03215	1.02588	1.01364	0.99692	0.997815	1.01396	1.01099	1.03011	1.02348	1.03626	1.01579		1.01919	0.985354	1.01493	1.03222	1.01175	1.00941	1.01826	1.00851	1.01843	1.01344	1.00359	1.00842		1.0326	0.97727	0.997468	1.03695	1.03659	0.970008		1.04054	1.02603	1.01921
8.167	1.02701	1.03609	1.00993	1.01911	1.06536	0.997596	1.02584	1.02801	1.04774	1.03094		1.02936	1.00676	1.01801	1.01958	1.02186	1.01324	0.999889	0.99322	1.01844	0.994034	1.04238		1.04807	1.01296		1.01368	0.98445	1.02772	1.03167	1.01554	1.0011	1.02771	1.00955	1.02277	1.00266	0.983797	1.00242		1.02205	0.978195	1.00772	1.04162	1.0326	0.997471	1.02243	1.04463	1.03205	1.02019
8.2	1.03234	1.03983	1.0147	1.01892	1.07138	1.03302	1.02417	1.01519		0.993111		1.02995	1.02022	1.0069	1.0188	1.02604	1.03406	1.0017	1.01262	1.0126	1.01615	1.02046	1.02292	1.04038	1.01067		1.00631	0.999511	1.02323	1.03128	1.01595	1.00698	1.00935	0.99623	1.02277	1.00813	0.98693	1.01917		1.03859	0.97912	1.0105	1.02899	1.03404	0.961187	1.03351	1.02382	1.04425	1.01588
8.233	1.02967	1.05153	1.01776	1.01485	1.05863	1.01595	1.01892	1.02042	1.06033	1.01345		1.03635	1.00215	1.01055	1.01098	1.03141	1.01283	1.0134	0.998802	1.03338	1.01921	1.01727		1.04263	1.01862		1.02902	0.988067	1.02196	1.00798	1.01933	0.985313	1.02472	1.00476	1.02222	1.03455	0.998192	1.02704		1.03085	0.972804	1.00587	1.03445	1.01844	0.972925	1.02053	1.03558	1.05452	1.01588
8.267	1.02214	1.03654	1.01865	1.01485	1.05729	0.998956	1.01533	1.01672	1.04577	1.01656		1.02441	1.01791	1.0096	1.01137	1.02042	1.01517	1.00706	1.01639	1.02806	1.01124	1.00606	1.02098	1.04543	1.01823		1.0241	0.966768	1.03296	1.02296	1.01496	0.984478	1.01734	1.00528	1.02222	1.0204	1.00446	1.00297		1.03221	0.977429	1.00009	1.02979	1.02989	0.973092	1.02243	1.03696	1.03108	1.01548
8.3	1.02131	1.04759	1.0065	1.00546	1.0651	1.01645	1.00921	1.01781		1.01546		1.03388	1.02348	1.01341	1.03618	1.0284	1.0138	0.992142	1.02041	1.02747	1.02065	1.02144	1.02428	1.05608	1.02524		1.02571	0.988532	1.01388	1.02163	1.01059	0.988929	1.01565	0.998729	1.02914	1.01775	0.991429	1.01652		1.03876	0.973504	1.00679	1.02376	1.01934	0.960549	1.02567	1.03794	1.03092	1.01938
8.333	1.01553	1.0454	1.02387	1.00971	1.05513	1.03681	1.00754	1.01321	1.03359	1.02407		1.01102	0.99832	1.02626	1.02305	1.0212	1.01397	1.00624	1.01803	1.02992	1.00225	1.00606	1.02292	1.03976	1.00793		1.03147	1.00855	1.03348	1.02728	1.02015	1.00639	1.01673	1.02256	1.02075	1.01289	1.00036			1.03628	0.966581	1.02167	1.01369	1.02243	0.986303	1.00463	1.02301	1.0493	1.02661
8.367	1.01397	1.02576	1.01153	0.99768	1.06097	1.03474	1.017	1.02169	1.03577	1.02563		1.02151		1.02682	1.02534	1.0423	0.998398	1.0106	1.01908	1.02215	1.00081	1.00941	1.013	1.06075	1.02162		1.04172	0.994551	1.02503	1.03239	1.00343	1.00413	1.03287	1.01595	1.02766	1.02173	0.986598	1.02026		1.03436	0.974364	1.00734	1.01249	1.01317	0.962327	1.02686	1.04048	1.02723	1.03521
8.4	1.02545	1.03635	1.02126	0.988031	1.0538	1.02224	1.01113	1.01123		1.03048		1.02458	1.01751	1.02912	1.02328	1.01639	1.01357	1.00525	1.02007	1.01582	1.0053	1.00843	1.01381	1.04295	1.02139		1.0307	0.985445		1.02101	1.0064	1.02579	1.02548	1.00233	1.0303	1.01305	1.00679	1.018		1.03724	0.966515	1.00625	1.01386	1.02062	0.968633	1.02109	1.03909	1.04288	1.0262
8.433	1.02884	1.02822	1.01478	0.987848	1.04885	1.03698	1.01805	1.00645	1.05152	1.01766		1.02049	1.01273	1.02317	1.00669	1.01316	1.00825	1.00344	1.02779	1.02477	1.01921	1.00409	1.0101	1.04878	1.02012		1.03291	0.984915	1.04015	1.02329	1.01397	1.01933	1.02103	1.01028	1.01624	1.00719	0.998992	1.00952		1.03515	0.956817	1.00903	1.01409	1.0219	0.965313	1.02758	1.03027	1.02603	1.02953
8.467	1.02241	1.02905	1.01109	0.984034	1.05361	1.03327	1.01279	0.997968		1.02232		1.02518	1.02906	1.03221	1.02211	1.01505	1.00495	1.01934	1.0199	1.03153	1.01345	1.01636	0.996482	1.0612	1.02162		1.02782	0.987938	1.03596	1.02533	1.00285	1.01689	1.01658		1.01344	1.02455	0.99746	0.995262		1.05482	0.956275	1.00609	0.990599	1.01754	0.951866	1.0184	1.03541	1.03317	1.03148
8.5	1.01929	1.03745	1.02063	0.998379	1.06142	1.02388	1.01174	0.996885	1.03072	1.02297		1.02928	1.02213	1.01745	1.03143	1.00115	1.01196	1.01975	1.02344	1.0083	0.999793	0.998367	1.0097	1.05933	1.02941		1.03249	0.986504	1.03417	1.03271	1.00145	1.01446	1.01619	1.00071	1.01531	1.00946	0.990463	1.02984		1.0338	0.946035	1.01574	0.962839	1.01248	0.957937	1.02069	1.02456	1.01848	1.0219
8.533	1.01773	1.02357	1.02991	1.01034	1.06142	1.0212	1.02443	0.996436	1.03478	1.02343		1.00232	1.01234	1.00674	1.03428	1.01545	1.00825	1.01661	1.01908	1.0083	0.993438	1.00958	0.996482	1.0594	1.02162		1.03045	0.972722	1.0403	1.02533	1.00978	1.00329	1.01842	1.00586	1.00148	1.00907	0.993361	1.02042		1.03131	0.954201	1.00517	0.981102	1.02175	0.950727	0.988109	1.02832	1.0241	1.02409
8.567	1.0124	1.02886	1.02864	1.00847	1.07031	1.02492	1.02338	0.994904	1.05389	1.01857		1.02024	1.00158	1.0165	1.02132	1.004	1.01738	1.01784	1.02582	1.01176	1.00285	1.00524	1.013	1.06539	1.02312		1.018	0.983482	1.03993	1.01301	1.01216	1.00027	1.01712	1.01366	1.00894	1.01758	0.995694	1.01987		1.0286		0.998843	0.965007	1.01775	0.959715	1.00148	1.03639	1.01615	1.01921
8.6	1.02287	1.03526	1.02081	1.00997	1.07291	1.02345	1.01559	1.00619		1.01838		1.02126	1.00406	1.01269	1.01808	1.0021	1.00568	1.00672	1.02147	1.00728	1.00632	0.988642	1.01163	1.06297	1.02784		1.03088	0.972412	1.04569	1.02683	1.01019	0.987086	1.0112	1.01278	1.01383	1.00531	1.01275	1.03171		1.02532	0.961442	1.00887	0.971039	1.01903	0.978259	1.01843	1.03345	1.02081	1.00395
8.633	1.02085	1.02886	1.03404	1.01316	1.05774	1.02034	1.01725	1.00338	1.0324	1.01261		1.01674	1.0035	1.01039	1.02227	1.01253	1.00785	1.02542	1.00084	1.00998	1.00429	1.01327	1.00389	1.06577	1.02296		1.02147	0.979116	1.05975	1.01906	1.0092	1.0027	1.01619	1.01668	1.01865	1.01266		1.02813		1.02916	0.962049	1.01056	0.977071	1.01195	0.951866	0.984959	1.03125	1.01752	1.01158
8.667	1.02994	1.03325	1.02107	1.01529	1.06662	1.01681	1.0274	1.02098	1.03171	1.01838		1.01861	0.992911	0.995861	1.02227	1.01119	1.01173		1.00306	1.01218	1.01022	1.01212	1.01187	1.06873	1.02296		1.03782	0.959689	1.05975	1.02777	1.01653	0.987503	1.00674	1.02131	1.01602	1.01062	0.999958	1.02191		1.04211	0.961507	1.00794	0.969506	1.01323	0.951464	0.997219	1.03835	1.0123	1.00768
8.7	1.01488	1.03151	1.02476	1.01034	1.06465	1.01784	1.03396	1.02098	1.04508	1.01838		1.0048	0.994263	1.00753	1.01334	0.999743	1.00956	1.02641	0.995912	1.01057	1.02065	1.02161	1.02081	1.06275	1.02241		1.0313	0.957287	1.03903	1.00164	1.01636	0.993136	1.00452	1.01116	1.00405	1.01305	1.00575	1.00868		1.01781	0.965048	0.999386	0.973206	1.02649	0.958103	1.00371	1.02065	1.01791	1.01726
8.733	1.00469	1.03261	1.01757	1.01778	1.06187	1.0407	1.02381	1.02711	1.04746	1.01353		1.02229	0.996572	1.00792	1.01468	1.0127	0.993014	1.02402	0.996899	0.99892	1.00962	1.01276	1.01284	1.04868	1.01918		1.03189	0.965644	1.03559	1.01545	1.0078	0.992545	1.0049	1.02338	1.01322	1.01454	0.991195	1.03829			0.965432	0.999545	0.963308	1.03048	0.956326	1.01217	1.0297	1.02546	1.01686
8.767	1.01994	1.03662	1.02558	1.00494	1.06205	1.02199	1.01935	1.04381	1.05053	1.00491		1.01384	1.00732	1.01364	1.01847	0.995001		1.0105	1.00922	1.0148	0.994878	1.01785	1.00623	1.05467	1.02791		1.03249	0.962027	1.03633	1.01561	1.00937	0.986077	1.00821		1.00646	1.00868	1.00052	1.02255		1.03515	0.972131	0.989518	0.962908	1.02559	0.962396	1.01627		1.0241	1.00574
8.8	1.0215	1.03662	1.02297	1.01008	1.06313	1.0388	1.02146	1.04299	1.04844	1.01132		1.02169	0.961944	1.01197	1.01697	1.00772	1.00294	0.995181	1.01752	1.00662	1.03252	1.01686	0.99962	1.04698	1.01484		1.038	0.968421	1.01666	1.01428	1.03045	0.982216	1.01972	1.02287	1.00965	1.0011	1.01002	1.04064		1.03012	0.951333	0.994915	0.970707	1.01903	0.959645	1.03367	1.03402	1.01888	1.00768
8.833	1.04409	1.02428	1.02215	0.998561	1.059	1.03295	1.03012	1.03974	1.05082	1.00427		1.01759	0.987106	1.01173	1.02345	1.00638	0.997291	1.00334	1.01735	1.00966	1.01166	1.01368	1.00155	1.04775	1.03248		1.04232	0.980769	1.02438	1.03492	1.02212	0.991292	1.00674	1.01912	1.01881	1.00657	1.00575	1.01438		1.0521	0.951875	1.00347	0.967574	1.03831	0.955992	1.02354	1.03068	1.02161	0.99965
8.867	1.03104	1.02364	1.01865	1.00307	1.07049	1.02941	1.03432	1.0456	1.04389	1.02085		1.01699	0.99037	1.00237	1.03372	1.0037	1.00003	1.00235	1.01875	1.01414	1.01124	1.00385	0.993412	1.05055	1.01005		1.03351	0.976623	1.02862	1.02354	1.03226	0.986077	1.02863	1.01772	1.01695	0.999936	1.01975	1.00284		1.02628	0.95465	0.993605	0.969907	1.03448	0.945463	1.01991	1.03264	1.01848	1.01394
8.9	1.02526	1.02364	1.01712	0.991556	1.05558	1.02648	1.03178	1.03604	1.04319	1.00802		1.02024	0.992679	1.00983	1.03104	0.993199	1.00454	1.00491	1.02171	1.02292	1.00632	1.01392	1.0088	1.04752	1.02996		1.02614	0.986788	1.03909	1.02621	1.02253	1.00086	1.00951	1.02479	1.02332	1.00541	1.01622	0.999324		1.03188	0.966357	1.01011	0.967008	1.01414	0.962298	1.02561	1.0324	1.03743	1.02862
8.933	1.02195		1.02927	0.992437	1.0625	1.02838	1.01787	1.03342	1.04418	1.01554		1.01981	1.00597	1.00125	1.03088	1.00275	1.00778	0.99576	1.00084	1.02047	1.02082	1.00778	1.01541	1.02615	1.02296		1.01122	0.999446		1.02848	1.0339	1.01765	1.0049	1.00117	1.01299	1.01088	1.03078	1.01062		1.03956	0.952034	1.00718	0.967574	1.01195	0.962701	1.02925	1.03973	1.01825	1.01451
8.967	1.01994	1.03734	1.00479	1.00165	1.06636	1.02588	1.02776	1.03929	1.05488	1.0268		1.02253	1.01059	1.01006	1.02361	1.01286	1.00294	1.00013	1.03001	1.01701	1.01693	1.01334	1.0055	1.01395	1.01934		1.0174	0.985135	1.0272	1.02221	1.01561	1.00305	0.998756	1.01647	1.01035	0.995403	1.02161	1.00836		1.03148	0.951267	0.995457	0.973206	1.01617	0.953144	1.02387	1.03558	1.03992	1.02466
9	1.03546	1.02739	1.00911	0.999336	1.07075	1.04087	1.02776	1.02864	1.04081	1.01288		1.02603	1.01346	1.01578	1.01399	1.00812	0.997693	1.00071	1.00939	1.01827	1.02634	1.02178	1.00703	1.03346	1.02029		1.0174	0.995455		1.00368	1.01824	1.0012	1.0006	1.0175	1.02123	1.00635	1.02315	1.00726		1.02956	0.944026	0.996159	0.964675	1.00833	0.969007	1.02577	1.02163	1.03294	1.02815
9.033	1.03234		1.0137	1.00917	1.05926	1.02052	1.02269	1.02801	1.03606	1.0268		1.0332	1.0129	1.00697	1.01723	1.01057	1.00568	0.999719	1.03889	1.03111	1.01998	1.0275	1.01968	1.00214	1.02218		1.01249	0.982203	1.00034	1.01428	1.01998	1.00465	0.999138	1.01677	1.02216	1.00259	1.02918	1.01529		1.03572	0.95535	0.993381	0.965241	1.00871	0.949824	1.02253	1.02872	1.03896	1.02718
9.067	1.03123	1.02629	1.01604	0.998454	1.06402	1.02095	1.02374	1.03297	1.04299	1.01865		1.04038	1.00119	0.99872	1.01903	1.00108	1.00705	1.00228	1.04069	1.02799	1.02363	1.00599	1.0316	1.03027	1.02446		1.0174	0.979645	0.982093	1.01373	1.02063	0.985588	1.00598	1.01464	1.02232	1.00673	1.04027	1.01342		1.04555	0.959975	0.996701	0.9873	1.01361	0.945768	1.01794	1.01004	1.01688	1.0297
9.1	1.04317	1.03689	1.01451	1.0051	1.06599	1.01242	1.02627	1.02666	1.03031	1.02616		1.02271	0.993307	1.00141	1.02898	1.02186	1.00859	0.9975	1.02541	1.02638	1.02219	1.00165	1.02289	1.02577	1.02084		1.01333	0.985445	0.966015	1.01828	1.02779	1.0012	1.00467	1.01339	1.01167	1.00298	1.02708	0.996291		1.03876	0.947502	0.997084	0.970473	1.01398	0.962131	1.03836	1.03916	1.01648
9.133	1.03013	1.02455	1.01496	1.01669	1.05818	1.0288	1.02522	1.03451	1.02388	1.0235		1.00412	1.01138	0.994514	1.03333	1.00638	1.01464		1.00956	1.01641	1.00625	0.993961	1.02893	1.02313	1.02139		1.01968	0.994332	0.934821	1.01506	1.01626	0.998942	0.990387	1.02104	1.01881	0.999936	1.03448	1.00868		1.03108	0.953435	0.990219	0.970873	1.00983	0.953144	1.02918	1.01771	1.01496	1.02207
9.167	1.02058	1.03004	1.00822	1.02094	1.05863	1.02449	1.03686	1.02558	1.04606	1.00894		1.0095	0.986613	1.00713	1.0297	1.0018	0.994551	0.994291	1.01466	1.0154	1.01218	1.01049	1.02723	0.998341	1.02918		1.0201	0.977088	0.928315	0.995362	1.04986	1.00482	1.00706	1.02119	1.01392	0.982353	1.02458	1.00229		1.04131	0.948427	0.989836	0.964441	1.02534	0.940267	1.02997	1.02203	1.02097	1.02597
9.2	1.0248	1.03378	1.00452	1.01988	1.06168	1.0257	1.02627	1.01818	1.02982	1.01645		1.01342	0.994099	0.997372	1.02322	1.00275	1.00875	1.00204	1.01367	1.02317	1.00625	0.980713	1.01868	1.02181	1.02446		1.02112	0.993427	0.916574	1.01805	1.04369	1.00826	1.00038	1.00802	1.02425	0.987114	1.03038	1.01319		1.04594	0.947502	0.993222	0.967174	1.0288	0.952171	1.03131	1.03541	1.01848	1.0146
9.233	1.02591	1.03004	0.998412	1.0267	1.05171	1.03752	1.03004	1.03514	1.0329	1.02331		1.01137	0.996012		1.01752	0.992643	1.00351	1.00641	1.01721	1.02663	1.01812	0.999686	1.02586	1.01878	1.03241		1.01698	0.970914	0.917844	1.01106	1.05143	0.998769	1.0026	1.01089	1.02254	0.977498	1.02555	1.01865		1.04154	0.950277	0.991529	0.961707	1.02865	0.933224	1.03511	1.02065	1.01672	1.02792
9.267	1.03169	1.03443	1.00669	1.0376	1.05038	1.02691	1.03091	1.02954	1.02695	1.02753		1.00829	0.986613	1.01213	1.01199		0.986564	1.00221	1.02772	1.02561	0.99642	1.00565	1.03697	1.01521	1.03847		1.03495	0.970384	0.929213	1.01373	1.03833	1.01574	1.01374	1.01442	1.02277	0.993203	1.01872	1.00642		1.04131	0.948044	0.993539	0.960907	1.04265	0.937919	1.03147	1.02693	1.02756	1.02516
9.3	1.0361	1.02803	0.993903	1.02821	1.05127	1.03209	1.0345	1.02864	1.02408	1.02753		0.967347	1.00063	1.01173	1.01428	0.988782	0.994551	0.987703	1.00414	1.02072	1.01872	1.0108	1.029	0.996248	1.02257		1.02596	0.972193	0.93894	1.00368	1.05604	1.00885	1.00744	1.01781	1.01772	1.0068	1.02981	0.995904		1.04035	0.951202	0.993381	0.988101	1.02172	0.9401	1.01889	1.02082	1.01575	1.02183
9.333	1.02526	1.02145	0.993456	1.03786	1.05082	1.03502	1.03747	1.03234	1.02269	1.02331		0.973742	0.996012	1.01022	1.00535	1.00134	1.00625	0.99627	1.00809	1.02596	1.00422	1.01138	1.02005	0.997728	1.02446		1.02189	0.971508	0.922553	1.02377	1.04888	1.00885	1.01559	1.00927	1.02579	1.00172	1.02861	1.00042		1.03747	0.9609	1.00025	0.970238	1.02443	0.948685	1.02918	1.01609	1.01712	1.0224
9.367	1.03876	1.03113	0.986076	1.02289	1.05227	1.03209	1.03345	1.02972	1.02002	1.02844		0.974943	0.996804	1.01078	1.02037	0.998104	1.00875	1.01275	1.00989	1.02047	1.03321	1.01815	1.02296	1.01031	1.01745		1.03596	0.964649	0.912301	1.01623	1.04929	1.01776	1.01412	1.0089	1.01772	0.983976	1.02491	0.984453		1.03883	0.945876	0.995775	0.979169	1.04424	0.936377	1.00876	1.02612	1.02586	1.02711
9.4	1.03344	1.02875	0.987157	1.02014	1.06179	1.03312	1.02566	1.01799	1.02646	1.03815		0.963425	1.00238	1.01729	1.03618	0.990679	1.01343	0.99446	1.01269	1.01921	1.00625	1.03059	1.01772	0.996022	1.02162		1.02554	0.983171	0.919269	1.01451	1.03635	1.00802	1.02042	1.01707	1.01904	0.980931	1.02821	0.995743		1.03979	0.946801	0.993222	0.977403	1.02044	0.948518	1.02039	1.03909	1.01559	1.02476
9.433	1.03344	1.02327	0.98302	1.02546	1.04706	1.04451	1.02417	1.03279	1.03438	1.03329		0.978265	1.01966	1.0234	1.01919	0.992183	1.01634	1.01398	1.01129	1.00637	1.00397	1.02527	1.02279	1.02135	1.01422		1.02554	0.978057	1.01688	1.00297	1.04014	0.991638	1.02319	1.01546	1.01888	0.968821	1.01019	1.01077		1.03827	0.951809	0.981277	0.976436	1.02278	0.940336	1.012	1.02277	1.01775	1.02573
9.467	1.04032	1.01861	0.988052	1.02652	1.04948	1.03434	1.01569	1.01672	1.01764	1.03769		0.997626	0.994891	1.01341	1.01389	0.986492	1.00778	1.00491	1.02378	1.01067	1.01218	1.02232	1.01578	1.00861	1.00911		1.02393	0.974969	0.981811	1.00619	1.03857	0.99995	1.03057	1.01369	1.01531	0.966715	1.01308	1.00797		1.04267	0.944568	0.993222	0.978769	1.0206	0.939933	1.02348	1.02767	1.00595	1.022
9.5	1.0261	1.02062	0.988685	1.01563	1.0458	1.03166	1.01866	1.02367	1.03675	1.02973		0.994802	0.993375	0.999605	1.01523	0.999053	1.01012	1.0073	1.01942	1.01127	0.995576	1.0229	1.01772	1.00278	0.991412		1.01656	0.981299	0.915394	1.00485	1.0352	0.997343	1.02612	1.03018	1.01399	0.968915	1.02805	0.987098		1.03595	0.940485	0.979425	0.991234	1.02768	0.950296	1.03701	1.03199	1.01719	1.03376
9.533	1.01838	1.02262	0.983467	1.01493	1.04536	1.02795	1.0212	1.02106	1.02765	1.03769		1.00819	0.997432	1.00611	1.02724	0.993917	1.02319	1.00573	1.03824	1.0133	0.994137	1.01758	1.01111	1.01778	1.0169		1.0241	0.981983	0.88488	1.00681	1.04055	1.00054	1.02943	1.02466	1.01756	0.967815	1.01968	0.995583		1.02804	0.95905	0.982587	0.982869	1.02768	0.954588	1.0063	1.02848	1.02008	1.01437
9.567	1.02416	1.00098	0.984548	1.02388	1.0406	1.03252	1.03301	1.00581	1.04151	1.03083		1.00759	0.982857	0.99612	1.02629	0.99179	1.01286	1.0115	1.03068	0.99234	1.00906	1.02984	1.01812	1.00481	1.01233		1.02249	0.981234	0.897365	1.00225	1.04294	0.996925	1.02981	1.01436	1.01608	0.965938	1.00472	0.995195		1.03691	0.954967	0.977957	0.982869	1.01713	0.95563	1.01889	1.03281	1.03437	1.01907
9.6	1.02747	1.01002	0.987976	1.01999	1.03539	1.02338	1.02584	1.02954	1.01924	1.02863		1.03822	0.999344	1.00818	1.01903	0.995028	1.01093	1.01133	1.02395	1.0127	0.984305	1.02151		0.98437	1.01934		1.02596	0.98086	0.910158	1.00642	1.03165	0.99995	1.02981	1.00214	1.01142	0.957649	1.01615	1.0029		1.03923	0.953435	0.968856	0.976505	1.01585	0.948823	1.01722	1.03672	1.03727	1.02143
9.633	1.01773		0.976088	1.03576	1.04796	1.02984	1.01971		1.02092	1.04054		1.02551	1.0034	0.993031	1.02724	0.990056	1.00899	1.00177	1.02157	1.00578	1.01008	1.02347	1.01635	0.989423	1.01344		1.03063	0.979891	0.923696	1.01701	1.03898	0.99995	1.03035	1.02097	0.997366	0.970471	1.02001	1.01342		1.05594	0.96345	0.996926	0.975539	1.01479	0.963811	1.02236	1.03297	1.03943	1.03434
9.667	1.02766	1.0188	0.97456	1.01867	1.0432	1.01923	1.04352	1.00708	1.04003	1.03944		1.03148	1.00706	0.997237	1.02953	0.994636	1.00221	1.01726	1.00448	0.996572	0.999052	1.04597	1.01772	1.01375	1.01171		1.03487	0.972284	0.937234	0.9966	1.04154	1.01028	1.02182	1.01774	1.01499	0.944211	1.01888	0.992389		1.03747	0.962525	0.988208	0.981903	1.01495	0.963242	1.0082	1.02433	1.02586	1.0263
9.7	1.02462	1.00756	0.965204	0.986602	1.05075	1.02002	1.0254	1.02774	1.02904	1.04054		1.02141	0.989782	0.989777	1.02652	0.986587	0.99599	1.01009	1.00843	0.999616	1.00499	1.01463	1.02473	1.03892	1.01605		1.02894	0.96115	0.934167	1.00798	1.04219	1.00767	1.01905	1.01847	1.03293	0.959527	1.01985	1.01232		1.03204	0.954743	0.998778	0.974172	1.0166	0.963075	1.01374	1.03338	1.02506	1.03336
9.733	1.01397	1.01305	0.966099	0.994671	1.08648	1.04408	1.0387	1.01953	1.03171	1.03724		1.03268	0.975043	1.00009	1.02898	0.972685	0.997194	1.01446	1.01262	1.00088	1.00295	1.0148	1.02199	1.03014	1.00999		1.04495	0.968603	0.96214	1.01441	1.03527	1.01035	1.01759	1.01634	1.01065	0.973676	1.03248	1.02174		1.04283	0.960675	1.00095	0.967574	1.01932	0.96445	1.01414	1.04162	1.02875	1.03158
9.767	1.01553	1.01021	0.961514	0.992179	1.05577	1.02994	1.02435	1.01799	1.02428	1.03788		1.03353	1.00403	0.993194	1.02289	0.979948	0.99599	0.999139	1.01738	1.00063	1.00846	1.01914	1.01982	1.03184	1.01566		1.02003	0.974028	0.97546	1.01158	1.06491	1.00246	1.0222	1.02789	1.00537	0.980476	1.02805	0.992616		1.03956	0.962525	0.99686	0.966608	1.01458	0.986648	1.01437	1.03199	1.0241	1.0263
9.8	1.02085	1.01176	0.967366	1.00113	1.05963	1.03762	1.02812	1.01538	1.03003	1.03303		1.02406	0.984441	1.0024	1.03261	0.991953	0.998329	0.992961	1.01738	1.01651	1.00134	1.02249	1.02079	1.0435	1.00709		1.01782	0.968383	0.971123	1.0254	1.05635	1.00959	1.0189	1.01899	0.997139	1.02221	1.04124	0.999391		1.03108	0.960517	1.00411	0.984235	1.02475	0.960894	1.00804	1.03118	1.03437	1.01884
9.833	1.01397	1.01551	0.971241	0.997315	1.05101	1.03219	1.03109	1.00817	1.02191	1.03458		1.02713	0.997896	0.989777	1.02921	1.00072	1.00124	0.986784	0.991416		1.00973	1.02307	1.02079	1.03938	1.01416			0.977799	0.979951	1.02046		1.02193	1.01129	1.02774	0.993023	0.996341	1.03794	1.00671		1.02876	0.969766	0.989227	0.961942	1.02821	0.997177	1.02885	1.04341	1.02779	1.02728
9.867	1.01883	1.00866	0.965837		1.06789	1.04012	1.03196	1.01385	1.03388	1.00939		1.02978	1.00116	0.998584	1.01262	0.988877	1.0014	0.99692	1.00686	1.00283	1.01134	1.00392	1.01982	1.04987	1.00999			0.960775	0.970905	1.02572	1.05338	1.0179	1.00814	1.01796	0.993023	0.995953	1.03874	1.01871		1.04227	0.962908	0.985682	0.970473	1.02128	0.9622	1.02443	1.03199	1.03245	1.03491
9.9	1.02324	1.00665	0.976644	1.00396	1.04777	1.03287	1.03153	1.02278		1.03439		1.01374	1.01693	0.991683	1.01641	0.992508	1.01504	1.00368	0.989274	1.00959	1.00109	1.01653	1.02175	1.04482	1.00164			0.96642	0.96694	1.04032		0.982634	1.01053	1.01619	1.00499	0.986336	1.02298	1.00742		1.03724	0.97299	0.990153	0.959775	1.02964	0.964145	1.02174	1.0377	1.02024	1.0259
9.933	1.0294	1.01634	0.979886	0.964553	1.0545	1.0308	1.03617	1.02405	1.02695	1.02533		1.01724	1.02441	1.00128	1.02044	0.987929	1.00334	0.99651	1.00891	1.01466	0.998209	1.01473	1.01281	1.03471	1.01588			0.966265	0.963129	1.03977	1.05676	1.00127	1.00591	1.00656	0.993569	0.990869	1.03504	0.983905		1.03492	0.95975	0.97805	0.960341	1.03145	0.957839	1.0162	1.03909	1.02257	1.01827
9.967	1.02454	1.0177	0.97314	0.940634	1.05711	1.02684	1.05349	1.03253	1.02834	1.00609		1.02978	0.992555	1.00295	1.03546	0.995747	1.02319	0.993711	1.01129	1.0204	1.01457	1.0252	0.999591	1.06059	1.01305		1.00375	0.967014	0.96821	1.03655	1.05553	0.996579	1.00461	1.01759	1.01229	0.989381	1.03697	1.03087		1.01854	0.956976	0.975431	0.957608	1.03161	0.947074	1.00836	1.0377	1.04312	1.03491
10	1.02922	1.02693	0.980334	0.965617	1.05171	1.02916	1.03091	1.02793	1.0322	1.01425		1.04062	0.998128	0.982876	1.033	0.992901	1.01383	1.00163	1.01548	1.0155		1.01276	1.00233	1.03603	1.021			0.96558	0.96694	1.04243	1.06945	1.00395	1.01298	1.01296	1.00367	0.987892	1.03601	1.01023		1.04379	0.971457	0.975815	0.96404	1.03725	0.947074	1.02403	1.04537	1.02859	1.02785
10.033	1.02123	1.00491	0.974221	0.963489	1.04543	1.03873	1.03809	1.02875	1.01666	1.03174		1.02586	1.00195	0.99819	1.0063	1.00932	1.01674	1.00443	1.01827	1.02141	1.01355	1.00426	1.0066	1.03526	1.01116		1.01417	0.97612	0.962076	1.03671	1.0762	1.02503	1.00445	1.01649	1.00988	0.99563	1.02811	1.01155		1.0378	0.970916	0.978434	0.964275	1.03145	0.949421	1.00069	1.03102	1.02802	1.02395
10.067	1.02389	1.03159	0.974668	0.957289	1.04283	1.03148	1.03214	1.05139	1.02428	1.00894		1.03328	0.983881	0.993194	1.01183	1.00095	1.02376	1.00344	1.02279	1.01854	1.00864	1.03208	1.0074	1.0368	1.02328		1.00435	0.964146	0.957739	1.01136		1.02016	1.00537	1.01024	0.986269	1.00243	1.05154	0.99597		1.03356	0.973307	0.965405	0.974572	1.02347	0.948046	1.01099	1.04456	1.03245	1.03628
10.1	1.02389	1.02765	0.996097	0.962608	1.04867	1.0352	1.03493	1.04788	1.03577	1.02331		1.02628	0.994235	0.990335	1.01451	1.00268	1.0006	0.985314	1.0149	1.02488	1.01805	1.00091	1.01812	1.03999	1.01872			0.960155	0.96155	1.02706	1.06706	1.01512	1.01113	1.02054	0.993023	1.00149	1.03858	1.01249		1.03916	0.957676	0.963711	0.969907	1.02272	0.952908	1.0242	1.03142	1.02626	1.00139
10.133	1.02876	1.01952	0.994383	0.963231	1.05064	1.02916	1.04972	1.02983	1.04795	1.02331		1.01042	0.998456	0.990567	1.01703	1.0109	1.01246	0.993061	1.01711	1.02285	1.0205	1.00646	1.01385	1.03999	1.01644			0.962493	0.956841	1.02933	1.05512	1.01714	1.01835	1.01805	1.00296	0.99508	1.04051	1.00742		1.03068	0.948585	0.955537	0.967808	1.03145	0.945129	1.02056	1.0249	1.02819	1.0302
10.167	1.0396	1.03167	0.986818	0.953141	1.04283	1.02502	1.03957	1.02524	1.03359	1.018		1.02381	1.01653	0.98843	1.00961	1.00592	1.00722	0.99562	1.01432	1.01795		1.01947	1.01498	1.03719	1.00826		1.00663	0.958876	0.957957	1.01772	1.0613	1.02183	1.01059	1.00009		0.983198	1.03954	1.00929		1.04899	0.955668	0.959624	0.967408	1.0298	0.946671	1.0219	1.0377	1.0367	1.02744
10.2	1.04447	1.02262	0.967922	0.963231	1.03655	1.02563	1.03388	1.01829	1.04171	1.02551		1.02253	0.990738	0.983665	1.00581	1.0105	1.01327	1.00791		1.01144	1.0205	1.01751	1.01538	1.02966	1.00125			0.962183	0.977256	1.01317	1.06327	1.02486	1.00967	1.01091	0.983085	0.98867	1.03584	1.01436		1.03588	0.95975	0.972429	0.964909	1.024		1.01803	1.02629	1.02257	1.02412
10.233	1.03895	1.00938	1.00337	0.968002	1.05127	1.0333	1.0436	1.02894	1.03052	1.0147		1.02911	0.993211	0.983829	1.0138	0.999445	1.01561	0.996199	1.01177	1.02386		1.00768	1.02603	1.01839	1.00542		1.00782	0.955634	0.990422	1.00924	1.06525	1.02284	1.01451	1.02106	1.00405	0.98867	1.03294	1.02207		1.04164	0.968075	0.965722	0.97754	1.03816	0.958575	1.01748	1.04179	1.01389	1.00667
10.267	1.04006	1.02701	0.99994	0.975706	1.04391	1.02123	1.04823	1.03551	1.03646	1.0125		1.01331	1.00683	0.989219	1.00755	1.00877	1.01093	1.01886	1.01653	1.02918	1.03237	1.01422	1.01104	1.04272	1.00031		1.0107	0.957817	0.977102	1.01545	1.05471	1.03233	1.0238	1.01643	0.995048	0.985075	1.0475			1.03588	0.94951	0.976675	0.985505	1.03289	0.967563	1.0295	1.03257	1.01117	1.01511
10.3	1.04401	1.03231	0.990214	0.968002	1.04372	1.01873	1.0436	1.03245	1.0324	1.03633		1.03243	0.992815	0.999769	1.0209	1.00838	1.00585	1.01606	1.02089	1.02124	1.02932	1.03116	1.01628	1.03339	1.03218			0.9542	0.961986	1.01357	1.04458	1.01352		1.03313	0.994502	0.981253	1.03681	1.01326		1.03356	0.967533	0.967415	0.977374	1.03597	0.964007	1.02784	1.04122	1.02337	1.02549
10.333	1.03161	1.042	0.978697	0.971011	1.05082	1.02916	1.04465	1.03327	1.0226	1.03743		1.01639	0.992023	0.997863	1.01229	1.00379	1.01206	0.999338	1.00306	1.01246	1.02093	1.00785	1.02192	1.03075	1.02628			0.971818	0.980695	1.01168	1.04598	1.01209	1.01658	1.02886	1.00389	0.981414	1.04477	1.01271		1.04204	0.962908	0.970193	1.00466	1.03816	0.965618	1.02039	1.03257	1.02217	1.02354
10.367	1.02895	1.03825	0.97564		1.04435	1.04226	1.0457	1.03073	1.04409	1.03064		1.02253	1.00126	0.999442	1.01157	1.00514	1.00956	1.01821	1.00306	0.999022		1.00531	1.02893	1.03394	1.01794			0.958036	0.997672	0.98288	1.0412	1.01672		1.01481	1.0164	0.989703	1.04341	1.01536		1.06153	0.960134	0.976132	0.995334	1.02581	0.961895	1.02403	1.03689	1.02217	1.0216
10.4	1.04199	1.02262	0.977169	0.978275	1.04803	1.03373	1.04211	1.03858	1.03577	1.03614		1.02356	1.00261	1.01554	1.02168	1.01184	1.00899	1.00767	1.01793	1.02327	1.02567	1.04638	1.01378	1.04092	1.0136		1.01832	0.971663	0.991384	1.01412	1.0487	1.02402	1.01473	1.02423	1.00483	0.994008	1.03488	1.01068		1.04611	0.972224	0.979294	0.984636	1.03342	0.967396	1.02918	1.03216	1.01093	1.03158
10.433	1.04043	1.03515	0.984548		1.04175	1.03227	1.04867	1.0329	1.0427	1.03018		1.02006	0.981668	1.01673	1.02152	1.00458	1.00722	1.00511	1.03256	1.03163	1.02117	1.01914	1.01982	1.0285	1.01934		1.02425	0.967517	0.99857	1.0109	1.04492	1.01168		1.02813	0.999777	0.988147	1.03448	1.00126		1.05098	0.974457	0.9769	0.999365	1.02964	0.949421	1.012	1.04122	1.00475	1.03669
10.467	1.03887	1.02591	0.985181	0.971193	1.04606	1.02727	1.04316	1.03398	1.05062	1.03265		0.98526	0.97936	1.01936		1.0105	1.00351	0.998348	1.03658	1.01718	1.02405		1.00991	1.04295	1.03775			0.96917	1.00957	1.01051	1.04451	1.00983	1.02011	1.02652	1.00319	0.982837	1.04211	1.02929		1.03899	0.968141	0.976741	0.996466	1.02964		1.03954	1.03608	0.998732	1.04197
10.5	1.02492	1.02966	0.973927		1.04041	1.02166	1.05331	1.03704	1.05279	1.0331		1.02049	0.997036	0.994119	1.02398	1	1.01383	1.01186	1.02228	1.02841	1.02405	1.013	1.01942	1.04086	1.01556			0.966613	1.00957	1.02267	1.04253	1.02343		1.03718	1.01087	0.980731	1.04388	1.01146		1.0469	0.972607	0.973963	0.982303	1.0313	0.955658	1.0359	1.03453	1.02779	1.03417
10.533	1.01491	1.02107	0.978882	0.97057	1.03179	1.02209	1.04106	1.03506	1.0523	1.0331		1.01639	0.990902	1.00063	1.02816	1.01541	1.00197	1.01186	1.02902	1.0345	1.0171	1.02208	1.01805	1.0341	1.01895		1.02874	0.966238	1.01496	1.01113	1.03635	1.02242	1.01696	1.0235	1.01351	0.975098	1.04211	1.0173		1.04227	0.965749		0.982703	1.01533	0.970313	1.03495	1.03159	1.02081	1.03003
10.567	1.01556	1.00636	0.989056	0.975889	1.02766	1.01959	1.03537	1.03533	1.04684	1.0243		1.01699	0.974018	0.993955	1.02872	1.01043	1.00665	1.01145	1.03001	1.01819	1.02286		1.01217	1.04218	1.01856		1.02526	0.97949	1.00882	0.998256	1.03734	1.02545		1.03807	1.00512	0.982125	1.03938	1.02446		1.03628		0.996635	0.976505	1.0264	0.955825	1.01968	1.03078	1.0245	1.03003
10.6	1.00803	1.02527	1.01011	0.972257	1.03565	1.02563	1.03791	1.03424	1.04635	1.03997		1.01102	1.00363	1.00118	1.02761	1.01194	0.991879	1.02142	1.03215	1.01659	1.02921	1.03272	1.01184	1.03339	1.01478		1.02832	0.979116	1.01697	1.00869	1.03059	1.02402	1.01527	1.02615	1.01055	0.967815	1.05047			1.03284	0.966291	0.994082	0.970707	1.03077	0.951769	1.0063	1.03787	1.0253	1.02492
10.633	1.00555	1.0409	1.00247	0.98528	1.03197	1.03037	1.05015	1.02117	1.06448	1.04043		1.02646	0.982296	1.00102	1.03157	1.00144	0.993249	1.00947	1.02483	1.00966	1.03371	1.04932	1.02699	1.0274	1.02178		1.02442	0.978741	1.02056	1.00508	1.02902	1.02906		1.03188	1.00589	0.975943	1.04757	1.02104		1.04035		0.986291	0.980839	1.02369	0.986677	1.02902	1.02507	1.02433	1.02923
10.667	1.01731	1.02308	1.0166	0.994489	1.03457	1.03659	1.02968	1.03622		1.03136		1.02458	1.01438	0.987843	1.01727	1.00428	0.993415	1.00906	1.00758	1.00619	1.02311	1.0355	1.02369	1.05048	1.00243		1.01849	0.991839	1.03658	1.01402	1.02861	1.02597	1.02342	1.02188	1.01001	0.984781	1.05764	1.02291		1.04651	0.966833		0.991537	1.0255	0.975578	1.02561	1.02686	1.02297	1.01649
10.7	1.02153	1.03167	0.982757	0.994048	1.03673	1.02909	1.04552	1.03226	1.05517	1.03072		1.00625	0.988826	1.00118	1.01759	1.01171	1.00551	1.00767	1.02303	1.01473	1.02658	1.02838	1.02426	1.0445	1.01478		1.02807	0.986194	1.02162	1.00664	1.0179	1.02639	1.02787	1.03468	1.00721	0.976104	1.05047	1.02891		1.03707	0.965366	0.989836	0.971742	1.03152		1.02695	1.03216	1.02008	1.01941
10.733	1.01822	1.03011	0.985367	0.983958	1.02048	1.03555	1.04718	1.03443	1.04299	1.02916		1.01119	1.01224	1.00086	1.01838	1.00674	0.997928	1.00528	1.02878	1.01431	1.03557	1.04163	1.01942	1.03906	1.00243		1.00866	0.987628	1.02685	1.00798	1.01271	1.02538		1.01996	1.01599	0.968432	1.05337	1.02158		1.03284	0.983772	0.984439	0.972142	1.02496	0.953616	0.994666	1.02426	1.01502	1.01722
10.767	1.02997	1.01778	0.988161	0.980767	1.03071	1.02951	1.04657	1.03181	1.05131	1.0484		1.02766	1.00245	0.999509	1.00391	0.999866	0.997526	1.01384	1.01867	1.01617	1.01921	1.04082	1.01998	1.04186	1.01784		1.03604	0.988687	1.0258	1.01214	1.02046	1.01967	1.01565	1.01747	0.997658	0.942239	1.03608	1.03304		1.04227	0.974298	0.98891	0.97021	1.02821	0.964548	1.03747	1.02392	1.0123	1.01195
10.8		1.02016	0.975378	0.992726	1.04004	1.03866	1.05059	1.02333	1.05418	1.01854		1.01571	1.00667	1.01062	1.0281	1.01053	0.994619	1.01565	1.03116	1.01312	1.02005	1.04654	1.01531	1.0445	1.01139		1.024	1.00082	1.02617	1.01253	1.01708	1.02899	1.03086	1.01247	1.00892	0.941139	1.0545	1.0191		1.04171	0.967216	0.989134	0.966745	1.03348	0.966159	1.01414	1.01504	1.01752	1.00959
10.833	1.01849	1.01952	0.991665	0.991222	1.04201	1.04805	1.05838	1.01485	1.04774	1.03538		1.01921	1.01606	1.0072	1.02967	1.00461	1.00551	1.02282	1.01292	1.00476	1.01005	1.03689	1.02402	1.04015	1.01351			0.98613	1.02025	1.01786	1.01708	1.03529	1.01658	1.0121	1.01319	0.933562	1.04114	1.02681		1.04363	0.959433	0.990219	0.947116	1.02949	0.969145	1.00709	1.01389	1.01888	1.01527
10.867	1.02225	1.01248	0.980148	0.992286	1.0377	1.05305	1.05418	1.0329	1.0523	1.06012		1.01119	1.01128	1.02386	1.02777	1.00611	1.01149	1.0262	1.01908	1.02673	1.01149	1.04319	1.02402	1.03603	1.0169		1.02916	0.985755		1.01292	1.00514	1.0227	1.03547	1.00466	1.02072	0.924173	1.05377	1.02097		1.03012	0.967057	0.99469	0.953314	1.03385	0.960325	0.994272	1.03828	1.01712	1.00781
10.9	1.01784	1.01048	0.988423	1.00832	1.03922	1.03684	1.0491	1.02614	1.05804	1.04445		1.01094	1.01837	1.00743	1.04246	1.00634	0.996322	1.02282	1.02245	1.01718	0.994528	1.03035		1.01669	1.01383		1.02179	0.999537	1.02676	1.01292	1.00036	1.00145	1.01972	1.02027	1.01342	0.945605	1.03841	1.02261		1.03956	0.975606	0.992455	0.961845	1.02624	0.96113	1.0143	1.02156	1.0123	1.00879
10.933	1.0194	1.02747	0.991032	1.00788	1.05242	1.05244	1.0512	1.03615	1.05328	1.04381		1.01324	1.0155	0.982915	1.02319	1.00405	1.00197	1.01804	1.03338	1.02453	1.0019	1.0153	1.01604	1.00503	1.011		1.02281	0.988468	1.02131	1.00915	0.997155	1.0211	1.02119	1.01048	0.99602	0.921129	1.04927	1.02471		1.04498	0.964282	0.98297	0.976808	1.03114	0.965589	1.01659	1.02335	1.02393	1.0027
10.967	1.01894	1.01861	0.981491	1.01753	1.05071	1.05994	1.06135	1.02117	1.04278	1.03849		0.992607	1.02068	1.01085	1.02303	1.00461	1.01076	1.01285	1.02286	1.0013		1.03665		1.01817	1.00077		1.01568	0.987189	1.03162	1.02351	0.988832	1.05796	1.0238	1.00762	0.986854	0.9424	1.04058	1.02058		1.02453	0.957583	0.994307	0.968277	1.03317	0.948184	1.02039	1.01902	1.01037	1.00741
11	1.01894	1.00654	1.00281	1.00212	1.04443	1.06597	1.06092	1.02053	1.0509	1.05067		1.01854	1.01399	0.993628	1.03386	1.00958	1.00608	1.01722	1.02483	1.03635	0.999444	1.02218	1.02749	0.990582	0.996595		1.03246	0.99171	1.01951	1.01103	1.00811	1.05445	1.01842	1.00158	1.00409	0.927312	1.04211	1.023		1.02724	0.960358	0.990762	0.97431	1.02518	0.946239	1.00591	1.02277	0.998897	1.00132
11.033	1.02225	1.00893	0.983915	0.995918	1.04488	1.04787	1.05523	1.03226	1.05447	1.05067		1.01649	1.00706	1.00608	1.04436	1.00919	1.00003	1.00272	1.01711	1.01515	1.01089	1.03641	1.02145	1.00053	1.00038		1.00526	0.987719	1.01412	1.02195	1.0123	1.01901	1.01842	0.999665	1.00261	0.939034	1.02658	1.02978		1.02876	0.973214	0.996701	0.973109	1.03573	0.953213	1.0101	1.02335	1.00066	1.01561
11.067	1.02868	1.02043	0.988238	1.00105	1.04703	1.04416	1.05925	1.01683	1.03942	1.05507		1.00847	1.01089	0.997113	1.01275	0.999866	1.00665	0.99473	1.0149	1.02148	0.987998	1.02611	1.02846	1.00091	0.991641		1.0101	0.98117	1.02063	1.01402	1.03001	1.00969	1.03118	0.99613	0.990038	0.922457	1.03841	1.02471		1.02588	0.953883	0.993381	0.967877	1.0401	0.936447	0.997911	1.01902	0.99993	1.02324
11.1	1.02648	1.00764	0.989581	1.0092	1.05053	1.0533	1.05418	1.01422	1.0509	1.05663		1.01956	1.01511	1.00592	1.03252	1.00366	1.00197	0.973298	1.02204	1.01127	0.999197	1.04451	1.02065	1.00877	0.995097		1.00993	0.98697	1.02766	1.01441	1.0254	1.00162	1.01919	0.876846	0.994927	0.93434	1.03061	1.01926		1.02588	0.960424	1.00101	0.98244	1.04914	0.96334	0.991421	1.02375	1.02955	1.02559
11.133	1.01784	1.00408	0.98302	1.00575	1.04443	1.05562	1.05269	1.02206	1.05279	1.05443		1.00992	1.00611	1.00838	1.0205	0.997969	1.00237	0.990601	1.02065	1.01617	0.999793	1.04197	1.00743	0.986076	0.992653		1.00916	0.986066	1.01576	1.02878	1.03833	1.01682	1.01511	0.988114	0.993768	0.945605	1.04864	1.01732		1.02109	0.952417	0.990762	0.978175	1.04733	0.979536	0.991258	1.01234	1.00146	1.02657
11.167	1.02473	1.01112	0.981306	0.993167	1.04317	1.04337	1.05987	1.02442	1.05418	1.04957		0.999675	1.00324	1.00227	1.02034	0.997021	1.00254	1.00947	1.01531	1.00434	0.989787	1.04597	1.01307	0.992449	0.99399		1.01035	0.990431	1.01756	1.02878	1.03455	1.01581	1.01142	0.992747	0.988399	0.937706	1.04437	1.02939		1.02165	0.960807	0.982044	0.986305	1.04206	0.959784	0.99506	1.01331	1.00339	1.02737
11.2	1.02868	1.01706	0.980225	0.995735	1.04227		1.06512	1.04029	1.04249	1.05067		1.0089	1.00779	1.00139	1.0228	0.988254	1.00414	1.01763	1.02303	1.00046	0.990631	1.04434	1.02081	0.98421	1.00021		1.02018	0.988404	1.01883	1.02478	1.02656	1.02068		0.995398	0.988946	0.953733	1.02651	1.00968		1.00735	0.958957	0.983738	0.975842	1.03972	0.956867	1.00227	1.01234	0.99953	1.0264
11.233	1.02454	1.00783	0.98373	0.995735	1.049	1.06001	1.0624	1.05247	1.02982	1.04297		1.02289	0.992255	1.00806	1.01213	0.994731	1.0127	1.01029	1.00438	1.00476	1.0019	1.04024	1.00429	0.995635	1.01413		1.01407	0.980951	1.01666	1.01662	1.01042	0.998178	1.01772	1.00122	1.00261	0.953572	1.02748	1.00758		1.02453	0.981063	0.97965	0.969244	1.03807	0.945129	0.994272	1.01136	1.00644	1.02267
11.267	1.01434	1.01195	0.976088	0.995112	1.04856	1.06759	1.05987	1.03417	1.04914	1.04828		0.995753	1.00452	1.01131	1.03553	0.988091	1.00665	1.00255	1.00816	1.00028	0.994528	1.00663	1.0055	1.00893	1.00562		1.01407	0.983289	1.00904	1.01207	1.0138	1.03285		1.011	1.00689	0.9413	1.02885	1.00968		1.00407	0.953407	0.986515	0.979541	1.02865	0.951435	1.00093	1.01707	1.01343	1.01836
11.3	1.02252	1.01532	0.975455	0.996176	1.05071	1.05612	1.05925	1.03372	1.04746	1.05314		1.00649	0.998552	1.02584	1.02011	1.00278	0.999631	1.00494	1.03075	1.01169	1.00292	1.03354	0.995182	0.996569	0.999173		1.04204	0.984567	1.0228	1.00791	1.02789	1.02051	1.02087	1.00975	0.982032	0.940911	1.02281	1.01178		1.01797	0.950249	0.99006	0.979541	1.02609	0.935808	0.994272	1.01609	1.01263	1.03265
11.333	1.02499	1.01842	0.986709	0.987408	1.04551	1.05741	1.06092	1.01306	1.03626	1.03592		1.00565	0.988362	1.01473	1.01988	0.99133	0.994619	0.999578	1.02657	1.00619	0.994775	1.05071	0.998486	0.996569	1.01475		1.04611	0.980576	1.02459	1.01662	1.01578	1.00833	1.01941	1.00725	0.99943	0.941689	1.03118	1.01404		1.03029	0.961031	0.981502	0.967145	1.02135	0.93346	0.99696	1.02	1.01994	1.02542
11.367	1.01149	1.03121	0.985629	0.987408	1.04722	1.07094	1.06302	1.02722	1.03794	1.05049		1.00095	1.00739	1.00592	1.02162	0.996465	1.00471	1.01391	1.01425	1.00619	0.999269	1.04238	1.00356	0.992062	1.01987		1.02933	0.982759	0.997427	1.00681	1.03925	1.0148	1.02179	1.00174	1.00712	0.949977	1.01911	1.01536		1.00503	0.950633	0.985589	0.969478	1.02481	0.935238	0.986045	1.01666	1.01858	1.02485
11.4	1.02518	1.02418	0.980858	0.986344	1.05547	1.05059	1.0512	1.02785	1.02884	1.05049		0.996178	0.998552	1.00116	1.03055		1.02109	0.99405	1.01605	1.00088	1.0013	1.05146	1.0113	0.992062	1.0286		1.03442	0.973124	1.02016	1.0134	1.02196	1.01237	1.01511	1.00652	0.99586	0.953572	1.02708	0.998455		1.00831	0.949866	0.980193	0.968277	1.02768	0.931113	1.01794	1.02058	0.998264	1.02956
11.433	1.01526	1.03322	0.986709		1.06455	1.06266	1.05523	1.04661	1.04844	1.0591		0.993953	0.998948	1.01394	1.01285	1.0035	1.00221	0.99405	1.01013	1.01127	0.999022	1.02398	1.00469	0.997888	1.02743		1.01891	0.976585	1.02091	1.02101	1.02352	1.01237	1.0251	1.00689	1.00387	0.949039	1.01212	1.00126		1.03085	0.941317	0.976489	0.971576	1.01533		0.991747	1.02335	1.0087	1.03484
11.467	1.02389	1.02546	0.988871	0.983776	1.0429	1.07723	1.0624	1.03092	1.0518	1.04187		0.996426	1.0155	1.02179	1.0191		1.00922	0.99644	1.01269	1.01676	1.01293	1.02774	0.99962	0.992996	1.03003		1.03604	0.973873	1.02076	1.01418	1.0353	1.00917	1.01826	1.00527	1.01265	0.965777	1.01775	1.01723		1.03452	0.939243	0.967004	0.970044	1.0035	0.948852	0.997517	0.999939	1.01007	1.02996
11.5	1.03454	1.02618	0.973927		1.04722	1.07327	1.05943	1.03813	1.05914	1.0547		0.999748	1.003	1.01814	1.02541	1.005	1.00495	0.990092	1.03174	1.01988	0.986311	1.03862	1.0101	0.994862	1.01146		1.03442	0.973343	1.01515	1.00069			1.02733	1.00475	1.01133	0.943178	1.01951	1.01591		1.02022	0.950567	0.977798		1.02241	0.959214	1.0025	1.01707	0.998264	1.03484
11.533	1.01571	1.02134	0.980411	0.98528	1.04614		1.05838	1.02505	1.04577	1.03307		0.993953	0.986681	0.997508	1.02083		1.0018	0.992071	1.02878	1.03128	0.995546	1.04729	0.998984	0.991289	1.04423			0.967543	1.03355	1.01772	1.03315	1.00472	1.02233	1.00865	1.01396	0.949977	1.01002	1.02168		1.03221	0.942018	0.985589		1.02075	0.935169	1.01453	1.02139	0.999296	1.038
11.567	1.02682	1.02444	0.981044	0.996176	1.06213	1.04352	1.06092	1.02505	1.03646	1.05671		1.00819	0.986846	0.999182	1.02446	1.00405	1.00197	0.99446	1.02623	1.0323	0.998601	1.05539	0.996482	0.999528	1.02054		1.02358	0.971909	1.01208	1.03839		1.01463		1.0088	1.01396	0.935989	1.02924	1.01607		1.02565	0.939785	0.981502		1.01058	0.9346	0.993322	1.01821	1.00435	1.04075
11.6	1.00781	1.02902	0.983205	0.983593	1.05216	1.06309	1.05374	1.04788		1.05094			1.00261	1.00227	1.02312	1.00232	0.993249	1.00204	1.03715	1.02131	1.00183	1.0522	1.00463	0.995409	1.02227		1.03681	0.97063	1.02038	1.03062	1.02104	1.01404	1.01588	1.00542	1.01956	0.956549	1.01492	1.02129		1.01311	0.943868	0.990986		1.01894	0.938322	0.993716	1.01649	1.00162	1.03645
11.633	1.02039	1.03852	0.985367	0.989793	1.04462	1.05956	1.05182	1.0329	1.04221	1.0229		1.01042	1.0132	1.00267	1.02747	1.00958	1.00979	0.998079	1.03518	1.02435	0.995896	1.01008	0.992942	1.00294	1.00236		1.02045	0.969352	1.02704	1.02419	1.03175	1.00127	1.02056	1.02139	1.01358	0.954283	1.00656	1.00439		1.01966	0.947568	0.974478		1.01766	0.936947	1.02577	1.00703	1.02041	1.03645
11.667	1.018	1.02856	0.967103	0.981648	1.0448	1.07405	1.05287	1.03533	1.02359	1.05295		1.01272	1.00475	0.99616	1.0097	1.01132	0.995755	1.00484	1.02786	1.02579	0.990137	1.03323	1.00229	1.00294	1.00715			0.982229	1.01605	1.00111	1.02994	1.00573	1.01072	1.00984	1.01676	0.942011	1.00969	1.0181		1.01135	0.943485	0.99006		0.999509	0.947476	1.01682	1.00842	1.01286	1.03427
11.7	1.02195	1.0303	0.981229	0.99724	1.04327	1.05491	1.04675	1.04183	1.02597	1.06908		1.00879	1.0124	0.998624	1.01886	1.01707	1.01601	1.00245	1.02827	1.01785	0.991329	1.01957	1.00205	0.979704	1.01761		1.02249	0.991335	1.01478	1.01138	1.02121	1.00329	1.00795	1.02139	1.02593	0.965615	1.00856	1.01452		1.01152	0.950884	0.979174		1.0093	0.944559	1.00686	1.01234	1.01456	1.03978
11.733	1.02085	1.02262	0.985552	0.98528	1.04722	1.04516	1.04552	1.04272	1.03478	1.05231		1.01409	1.01168	0.997671	1.02211	1.00491	1.00511	0.993711	1.03501	1.02233	0.973353	1.01957	1.00399	0.977224	1.00021		1.02164	0.988778	1.01822	1.00069	1.00152	1.02336	1.0111	1.01603	1.02763	0.948811	1.00896	1.01397		1.01615	0.955575	0.971158		1.01292		1.01184	1.00801	1.01978	1.0341
11.767	1.02728	1.03533	0.978172	0.98528	1.04956	1.05845	1.04718	1.03424	1.03359	1.06377		1.01367	1.01359	1.00053	1.02305	1.02473	1.0139	1.0003	1.02926	1.02537	0.998703	0.998634	1.00656	1.00986	1.02012		1.02579	0.993518	1.03677	1.02322	1.02895	1.0116	1.00089	1.01264	1.02593	0.945378	1.00872	1.01094		1.00648	0.948175	0.973936		1.01383	0.952574	1.00021	0.99798	1.01046	1.0345
11.8	1.02416	1.03798	0.975378	0.990416	1.04632	1.06016	1.04867	1.04922	1.04508	1.0525		1.02458	1.0132	1.00323	1.03009	1.01462	1.0123	0.99774	1.03681	1.02985	0.999968	1.0087	0.996648	0.994636	1.00895		1.03393	1.00097	1.02038	1.01772	1.00548	1.00555	1.01702	1.01353	1.02538	0.953277	1.00599	1.00923		0.99801	0.951174	0.975245		1.03077	0.944392	1.00424	0.991865	1.01858	1.02744
11.833	1.02792	1.0261	0.981229	0.989976	1.04937	1.04748	1.04508	1.04209	1.03339	1.04874		1.01529	1.01821	0.996092	1.01926	1.03539	0.997526	1.0059	1.02654	1.00907	1.00056	1.02506	1.01147	1.00155	1.01484		1.03224	0.985317	1.03984	1.02	1.00169	1.00169	1.00051	1.01706	1.00853	0.953438	1.00519	1.01958		1.00265	0.964189	0.98588		1.02097	0.953783	0.975197	1.01372	1.01046	1.02899
11.867	1.01644	1.03223	0.987528	0.984216	1.03915	1.05352	1.04762	1.04534	1.03507	1.06065		1.01734	1.01016	1.00855	1.00836	1.01273	1.0135	1.00771		1.02292	1.00608	1.00592	1.00623	1.01073	1.02185		1.02368	0.96726	1.02106	1.01035	1.0035	1.00656	1.02402	1.02008		0.944761	1.00286	1.01265		0.986822	0.959948	0.98342		1.03242	0.947546	0.98857	0.999127	1.02187	1.03094
11.9	1.02332	1.01925	0.990137	0.992544	1.04201	1.04956	1.04954	1.04732	1.04081	1.04984		1.01716	1.0034	1.00855	1.02669	1.00357	1.02891	1.01133	1.03402	1.00375	1.00404	1.01344	1.00993	1.01539	1.00729		1.03495	0.965451	1.02503	1.01451	1.01066	1.00211	1.00735	1.01706	1.01226	0.9468	1.01838	1.02036		1.00705	0.957715	0.994372		1.02971	0.96609	0.993159	1.00622	1.00934	1.02939
11.933	1.02039	1.02145	0.978882	0.990416	1.05127	1.05913	1.03896	1.04272	1.05201	1.05936		1.02391	1.00762	1.01213	1.02685	1.01273	1.01704	1.00638	1.02531	1.00704	1.00608	1.01164	1.00703	1.00436	1.00556		1.03477	0.957469	1.02698	1.0149	1.00193	1.01547	1.01772	1.00676		0.937184	1.01542	1.0181		0.989934	0.955099	0.985431		1.03121	0.968201	0.970051	1.00997	1.0099	1.02647
11.967	1.02085	1.02455	0.995988	0.984216	1.04911	1.06498	1.03327	1.05083	1.03368	1.05405		1.01614	0.999905	0.999904	1.02511	1.01273	1.01955	1.01075	1.01619	0.99521	1.00955	1.01859	1.02162	1.0049	0.998552		1.0213	0.955131	1.02645	1.01168	1.0049	1.01672	1.0118	0.996459	1.00776	0.960949	0.977932	1.02284		0.991854	0.966264	0.992455		1.04047	0.962131	0.978279	1.00818	1.01858	1.02233
12	1.02663	1.02035	0.988423	0.986344	1.04543	1.0567	1.047	1.05192	1.06755	1.05606		1.01137	1.01662	1.01578	1.01752	1.00435	1.02109	1.01116	1.03066	1.00357	1.01159	1.01656	1.01404	1.00265	0.998161		1.01824	0.979078	1.01831	1.00619	0.999713	1.009	1.00958	1.00374	1.00248	0.953049	0.985895	1.02603		0.996091	0.947091	0.980351		1.04424	0.972327	0.987063	1.01544	1.01648	1.00862
12.033	1.02351	1.02565	0.97456	0.995553	1.05082	1.05024	1.05689	1.04867	1.03548	1.04635		0.996529	1.01583	0.998162	1.02322	1.00379	1.00922	1.01075	1.02269	1.01295	0.997088	1.00632	1.01461	0.993476	1.01162		1.01926	0.969443	1.02496	1.02644	1.00169	1.0116	1.02533	0.991309	1.00589	0.941006	0.987427	1.01194		0.999765	0.948016	0.989836		1.03429	0.986343	1.00099	1.00386	1.01552	1.03427
12.067	1.02085	1.02693	0.988238	1.00326	1.04391	1.02213	1.04595	1.04912	1.0233	1.05121		1.0042	1.016	1.01729	1.02211	1.00782	1.00317	1.0016	1.02113	1.01235	0.993612	1.01459	1.008	1.00754	1.00856		1.01723	0.961305	1.01793	0.981157	1.0007	1.009	1.00735	0.997709	1.01731	0.946478	0.980996	1.02658		1.01112	0.959723	0.984055		1.03249	0.983426	1.00479	1.00247	1.02716	1.01252
12.1	1.01754	1.01615	0.98779	0.990234	1.04327	1.04377	1.04403	1.04433	1.03864	1.06046		0.995753	1.01026	0.989191	1.02613	0.997156	1.01567	0.999619	1.02524	1.00263	0.987432		1.00937	1.00023	1.01445		1.01579	0.970192	0.998634	1.01412	0.993948	1.00959	1.03016			0.947255	0.980264	1.01287		1.00129	0.959023	0.98645		1.03504	0.983829	1.00116	1.0068	1.0347	1.02015
12.133	1.01313	0.999616	0.99148	0.995993	1.05324	1.04541	1.04805	1.04344	1.04052	1.04745		0.994304	1.01042	0.985379	1.02384	0.997548	0.998731	1.00399	1.03913	1.00854	0.98989		1.01678	1.01018	1.01846		1.01477	0.963643	1.00672	1.0266	1.0007	0.994807	1.0105	1.01463	0.997885	0.947416	0.988959	1.00649		0.994733	0.969805	0.967481		1.04537	0.983829	1.0063	1.01055	1.02523	1.01487
12.167	1.02085	1.00821	0.985814	1.01221	1.03655	1.05206	1.05139	1.03865	1.06419	1.0448		1.00462	1.00525	1.00562	1.02741	1.00474	1.0005	0.984705	1.02565	1.00973	0.979636		1.00413	0.994636	1.00989		1.01316		1.01936	0.964839	1.01223	1.0116	1.00904	0.992407	1.00744	0.935923	0.988959	1.01023		1.00089	0.966105	0.977891		1.04755	0.986579	1.00765	0.998721	1.02057	1.01527
12.2	1.02443	1.01104	0.981229	1.00902	1.04867	1.04688	1.03537	1.05715	1.07321	1.047		1.01222	1.01234	0.994908	1.01052	0.995259	1.01026	1.00416	1.00979	0.996122	0.9921		1.00703	0.998755	1.01217		1.02095	0.975836	1.0109	1.00007	1.00053	1.00976	1.00904	0.991006	0.998271	0.941395	0.973433	1.0012		0.997777	0.970188	0.966172		1.04431	0.968771	1.00535	1.00051	1.01086	1.01235
12.233	1.0269	1.0115	0.996436	1.00494	1.04543	1.04834	1.03896	1.05715	1.06082	1.0481		1.01264	1.00508	0.998556	1.03627	1.00324	1.01721	0.998969	1.00963	1.01386	0.989046		1.00566	1.00551	1.00461		1.0234	0.977489	1.00545	1.00235	0.995756	1.00858	1.02402	0.991372	1.01574	0.9514	0.981396			0.992416	0.965021	0.963328		1.05735	0.974841	1.01128	0.994803	1.01303	1.03588
12.267	1.02865	0.996967	0.984286	0.998303	1.04346	1.04981	1.04823	1.04344	1.06082	1.05515		1.00974	1.00699	0.978247	1.0135	1.00514	1.0114	0.987603	1.02844	1.00837	0.98845		1.01227	0.997822	1.01185			0.963862	1.01951	1.01083	1.01346	1.00169	1.02517	0.998138		0.943111	0.977697	1.00719		0.994336	0.983969	0.965405		1.03851	0.983593	1.00765	1.0068	1.02539	1.01689
12.3	1.02755	1.01195	0.975563	1.00582	1.04067	1.0336	1.03537	1.04153	1.06439	1.03307		1.01222	1.00604	0.99793	1.03817	1.00838	1.00946	1.00375	1.01242	1.0169	1.0093		1.0055	1.01826	1.01547		1.02509	0.970256	1.00799	1.00534	1.00374	1.01001	1.00881	1.00064	1.00798	0.949911	0.981562			1.00496	0.976345	0.970418		1.04883	0.987315	0.985257	0.999533	1.01728	1.01218
12.333	1.02865	1.01104	0.980782	1.00964	1.04956	1.05791	1.03283	1.03892	1.05271	1.0459		1.00932	0.994167	1.00483	1.01468	1.01256	1.00655	1.00672	1.01184	0.998746	1.00625		1.00453	1.00265	1.0124		1.01628	0.969726	1.03088	0.99757	0.995587	1.02336	1.01995	1.01874	0.991197	0.942172	0.966035	1.00719		1.00112	0.966329	0.961476		1.05282	0.986176	1.02918	0.995615	1.01535	1.0224
12.367	1.0291	0.998707	0.984024	1.00839	1.04067	1.04731	1.03073	1.02457	1.04865	1.0448		1.02433	1.01009	1.00372	1.02155	1.01335	1.00558	1.0105	1.01167	1.0344	0.992944		1.00703	1.00638	1.01491		1.02119	0.974092	1.01375	1.01083	1.01131	1.00312	1.01995		1.00293	0.942561	0.993155	1.01055		1.00751	0.982436	0.970034		1.04574	0.984634	1.04058	1.00288	1.00605	1.02492
12.4	1.01625	1.002	0.973588	0.994048	1.06079	1.06473	1.0324	1.04198	1.04914	1.04901		1.02246	1.01432	1.01006	1.02882	1.01319	1.00501	1.0045	1.01167	1.0153	0.998456		0.993813	1.00545	1.01224		1.02569	0.977928	1.02025	1.00667	1.00299	1.00841	1.01957	0.992104	1.00223	0.945056	0.996854	0.998937		0.986095	0.985277	0.97096		1.04612	1.01307	1.00686	1.00345	1.0107	1.01729
12.433	1.02001	1.01944	0.987713	0.994048	1.04777	1.05041	1.02417	1.03197	1.063			1.02391	1.00221	0.99974	1.03071	1.01492	1.01728	1.00013	1.01068	1.01099	0.997612		1.00082	1.00545	1.01736		1.02323	0.982294	1.02459	0.998351	1.00975	1.02747	1.02533	1.00027	1.00239	0.956777	0.971032	1.00455		0.977059	0.984511	0.97227		1.02924	1.00311	0.992304	1.00565	1.01303	1.03101
12.467	1.02755	1.01872	0.982943	0.987848	1.05279	1.06577	1.02207	1.03937		1.047		1.01734	1.01854	1.01545	1.04312	1.01816	1.00752	1.01166	1.01307	1.01488	1.00186		0.996384	0.980504	1.01169		1.02628	0.963461	1.02137	1.00973	1.01633	1.01411	1.01142	1.00402	1.00798	0.950594	0.969265	1.01413		0.961072	0.981128	0.958156		1.0376	0.980509	0.950284	0.999533	1.00588	1.02314
12.5	1.028	1.01415	0.973217	0.996358	1.04543	1.07284	1.02714	1.04026	1.04705	1.04764		1.01896	1.00182	1.01069	1.03569	1.01665	1.01026	1.01463	1.00871	1.00896	0.99101		0.999689	1.00226	1.02498		1.02425	0.985975	1.01883	0.996304	1.00521	1.01898	1.02233	1.01182	1.00869	0.955127	0.970631	1.02348		0.970341	0.994143	0.971568		1.03451	0.994427	0.905575	0.999939	1.01944	1.01649
12.533	1.02534	1.03132	0.981677	0.995735	1.05406	1.05352	1.03519	1.01934	1.04705			1.01649	1.01583	1.00743	1.02312	1.02526	1.00154	1.01207	1.01684	1.00466	0.993468		1.00767	0.999462	1.02876		1.03221	0.976184	1.02908	1.0211	1.00323	1.01251	1.01012	1.00667	0.988267	0.955516	0.9646	1.00316		0.969381		0.967865		1.03866	1.01103	0.906525	1.0072	1.0115	1.02687
12.567	1.028	1.01085	0.982124	0.99955	1.05711	1.0618	1.02776	1.03242	1.05131	1.05276		1.01197	1.01121	1.00878	1.02731	1.01096	0.998066	1.00392	1.01882	1.01201	1.00017		0.994048	1.00397	1.02058		1.02551	0.977992	1.02332	1.01906	1.00719	1.02955	1.01604	1.01307	0.974985	0.954027	0.966132	1.01935		0.972095		0.971634		1.02285	0.995635	0.904231	0.999939	1.02659	1.01551
12.6	1.03306	1.02602	0.973664	0.997164	1.05298	1.06552	1.03222	1.0372	1.03417			1.02059	1.01273	1.00378	1.03988	1.00772	0.997899	1.01026	1.00748	0.99976	0.987462		1.00436	1.00847	1.02987		1.01161	0.987628	1.00978	1.02172	0.998215	1.02166	1.00789	1.00704	0.981353	0.95801	0.975462	1.0199		0.981762		0.961991		1.03595	0.985106	0.907476	0.998553	1.02506	1.0263
12.633	1.02644	1.01679	0.972769	0.995036	1.06402	1.06784	1.02758	1.03937	1.02219	1.0459		1.00617	1.00597	1.00625		1.01364	1.00178	1.00805	1.01405	1.01277	0.986865		1.00049	1.01765	1.02074		1.02856	0.993802	1.02242	1.01191	0.999034	1.01376	1.00881	1.00174	0.971642	0.954188	0.972964	1.04271		0.971931		0.970007		1.0303	0.997983	0.912065	0.998959	1.02353	1.03239
12.667	1.02313	1.02493	0.975378	1.00017	1.05711	1.0593		1.03133	1.03417	1.03463		1.01215	1.01306	0.996324	1.03245	1.01476	1.01243	1.02313	1.01266	0.997731	0.993221		1.00476	1.00786	1.02586		1.0239	0.979271	1.01824	1.02706	1.01428	1.04232	1.00474		0.990038	0.948717	0.967167	1.02052		0.981762		0.981568		1.00906	0.989801	0.9237	1.01943	1.02257	1.02556
12.7	1.03333	1.01259	0.983838	1.00381	1.06187	1.06198	1.02758	1.04243	1.02982	1.03618		0.999178	1.01059	0.995139	1.02826	1.00812	1.01808	1.01217	1.02729	0.995282	0.998136		1.0067	0.992476	1.02019		1.02365	0.979801	1.024	1.01929	1.01568	1.01763	1.00251	1.01667	0.983897	0.929645	0.979395	1.02465		0.971931		0.977705		1.02104	0.985342	0.906919	1.00311	1.01871	1.01655
12.733	1.02534	1.01214	0.979068	0.997422	1.06949	1.05845	1.03117	1.03937	1.04389	1.05561		0.99893	0.99578	1.00641	1.03758	1.01989	1.01631	1.01852	1.02967	1.00161	0.989745		1.00767	1.00577	1.00918		1.03467	0.972503	1.02131	1.02117	1.01016	1.02048	1.00051	1.00872	0.990424	0.938162		1.02371		0.975208		0.98125		1.00107	1.00033	0.914359	1.00761
12.767	1.03618	1.01899	0.960619	0.996358	1.05064	1.05095	1.02443	1.03918	1.05418	1.0514		0.997481	1.00518	1.01578	1.04613	1.00733	1.00445	1.01835	1.02851	1.01404	0.987709		1.00202	1.00467	1.00807		1.00501	0.964676	1.00321	1.02023	0.996646	1.02107	1.00274	0.994148	0.988173	0.950983	0.973364	1.03313		0.963622		0.973842		1.00544	0.997344	0.899479	1.01609	1.03733	1.01655
12.8	1.03553	1.01104	0.966918	1.00513	1.05387	1.04473	1.02696	1.03331	1.02576	1.06486		1.0084	1.009	0.987054	1.0225	1.01325	1.00775	1.0289	1.02358	1.0104	1.00228		1.0092	0.992476	1.01791		1.00214	0.976275	1.01886	1.00602	1.00876	1.01544	1.01072	0.990248	0.991197	0.946839	0.961702	1.0209		0.956506		0.979848		1.02013	0.98155	0.900266	1.00369	1.02553	1.0185
12.833	1.02892	1.02073	0.968184	1.00238	1.06384	1.04534	1.0295	1.03656	1.02576	1.05671		1.00635	1.00096	1.01173	1.02724	1.01001	1.00324	1.02296	1.03368	1.01285	1.00474		1.00783	1.00094	1.01224		1.0107	0.988248	1.01616	1.02361	1.01114	1.02149	1.00811	0.992229	1.00239	0.943633	0.967167	1.03632		0.948197		0.982242		1.00273	0.986412	0.898922	1.01845	1.02689	1.01007
12.867	1.03709	1.00548	0.965575	1.01221	1.0686	1.0437	1.03247	1.03656	1.04508	1.05515		0.991758	1.00079	0.996419	1.01847	1.02676	1.00171	1.0162	1.02753	1.00085	0.994733		1.01331	1.00039	1.01051		1.01747	0.978083	1.00157	1.02494	1.0207	1.01376	1.01327	0.993113	0.989426	0.94535	0.957837	1.02939		0.951871		0.981699		1.01252	0.997344	0.91626	1.0147	1.03075	1.00869
12.9	1.03112	1.01096	0.969898	0.996176	1.0677	1.04612	1.02153	1.02349	1.0434	1.04984		1.00925	1.00676	0.989913	1.03372	1.01855	1.01704	1.01999	1.02555	1.00903	1.00084		1.01701	1.00078	1.02286		1.02239	0.971005	1.01167	1.0189	1.01073	1.0146	1.01034	0.994211	1.00496	0.963643	0.960736	1.02394		0.95604		0.982467		1.0138	0.986245	1.02682	1.00801	1.03035	1.01339
12.933	1.04618	1.01407	0.968184	0.993608	1.07614	1.02888	1.03291	1.02375	1.06054	1.05671		1.01324	0.997924	0.987217	1.03791	1.01816	1.01083	1.01562	1.02916	1.01166	0.999227		1.01685	0.999849	1.01563			0.974092	1.01796	1.01678	1.00538	1.00024	1.00811	1.00113	0.990904	0.96426	0.960335	1.02223		0.943727		0.977837		1.03376	0.984634	1.02974	1.01274	1.04544	1.03255
12.967	1.0291	1.02065	0.9617	0.998121	1.07094	1.05423	1.03965	1.02764	1.0639	1.05341		1.02391	0.995055	0.99563	1.02796	1.01587	1.00946	1.0176	1.03368	1.00186	0.990835		1.00306	0.998755	1.02436		0.991713	0.969352	1.01691	1.02094	1.02029	1.00831	1.01572	1.0029	1.00139	0.973326	0.962502	1.02168		0.943892		0.980774		1.01689	1.01411	1.00132	1.01707	1.02626	1.03336
13	1.0134	1.02375	0.962781	1.00069	1.06878	1.04759	1.02678	1.02113	1.04241	1.04764		1.00232	0.989482	1.00555	1.0436	1.01168	0.996626	1.0045	1.01511	0.99518	1.00618		1.01474	0.997822	1.00556		1.01621	0.974247	1.01272	1.03625	1.01394	1.01964	1.00942	0.995979	1.01001	0.983881	0.956705	1.01755		0.96971		0.974451		1.02269	0.991274	0.984864	1.01193		1.02906
13.033	1.02001	1.01252	0.971241	1.00601	1.05235	1.04345	1.04787	1.03414	1.04598	1.0437		1.01452	0.996244	0.991029	1.03081	1.01587	1.00518	1.00968	1.01371	1.00921	1.00779		1.01942	1.00963	1.01256		1.00782	0.97169	1.02065	1.01051	1.01295	1.01293	1.00849	1.01856	1.01078	0.982553	0.958872	1.01265		0.956205		0.980932		1.0147	1.00187	0.999418	1.01984	1.03614	1.02906
13.067	1.02534		0.972584	0.993167	1.06967	1.04405	1.04131	1.03567	1.03974	1.04965		1.03013	1.00755	0.994841		1.01547	1.00728	1.01347	1.02399	0.991716	1.01906		1.03223	1.01585	1.01406		1.01375	0.977489	1.0196	1.01278	1.01336	1.00385	1.01034	1.01835	1.01117	0.987248	0.972632	1.02184		0.959714		0.975377		1.02322	0.990704	0.985814	1.01666	1.04392	1.02045
13.1	1.02618	1.0211	0.963938	0.99999	1.06276	1.05466	1.03711	1.04198	1.055	1.06422		1.02356	0.986846	0.99563	1.02835	1.00386	0.993582	1.01347	1.01609	1.00127	0.981847		1.02973	1.00893	1.02029		1.01249	0.97116	1.00606	1.02487	1.01954	1.00469		1.021	1.00387	0.997253	0.961605	1.01607		0.963156		0.977229		1.01901	0.972966	0.977424	1.01413	1.0517	1.02418
13.133	1.02572		0.968446	1.00212	1.05019	1.05095	1.03921	1.03611	1.04954	1.04415		1.02851	1.00221	1.01094	1.02472	1.0109	0.971725	1.01627	1.00419	1.02796	0.995329			1.00745	1.02824		1.02266	0.972594	1.00733	0.997408	1.01534	0.998638	1.01518	1.02652	1.00464	0.991392	0.969968			0.962361		0.969596		1.02007	0.998788	1.00053	1.02237	1.05233	1.02029
13.167	1.02792	1.01626	0.969079	0.999367	1.06447	1.0493	1.04595	1.03675	1.03183	1.05121		1.01784	1.00604	1.00158	1.03365	1.0071	0.979311	1.01347	1.00361	1.01351	0.994137		1.02506	1.01778	1.02957		1.01571	0.981855	1.01706	1.02903	1.01435	1.00107	1.0337	1.00326	1.00782	0.988186	0.960473	1.02394		0.959879		0.979623		1.00666	0.988593	0.979324	1.02098	1.04615	1.02516
13.2	1.03169	1.00832	0.964123	1.00513	1.05127	1.05241	1.0436	1.03458	1.04737	1.05276		1.04002	1.01105	0.999673	1.02623	1.00213	0.98673	1.01825	1.02382	1.02002	0.994558		1.02933	1.02229	1.04531		1.00427	0.983289	1.0131	1.01522	1.02547	1.00998	1.01203	1.0015	0.995633	0.987798	0.964172	1.00532		0.972027		0.9733		1.01704	0.989968	0.992535	1.01429	1.04864	1.01632
13.233	1.03546	1.02632	0.981044	0.997863	1.0632	1.04827	1.04272	1.02782	1.03252	1.05011		1.02766	1.00531	1.02665	1.01857	1.00955	0.980113	1.01784	1.00738	1.01047	0.992275		1.01788	1.01031	1.03563		1.01038	0.98254	1.02267	1.02487	1.02251	1.01182	1.01556	1.01173	1.00393	0.987409	0.976234	1.01584		0.969875		0.97461		1.02631	1.00576	1.0086	1.01625	1.04728	1.03904
13.267	1.02728	1.02413	0.973741	0.996981	1.05711	1.0462	1.03493	1.03918	1.04659	1.03774		1.02621	1.01527	1.0073	1.0241	0.998104	0.970424	1.02378	1.01157	1.01225	0.997191		1.02522	1.02586	1.03602		1.01115	0.977799	1.01347	1.01444		1.0187	1.03093	1.0018	0.993608	0.994369	0.970437	1.01507		0.982256				1.02481	0.987218	0.99506	1.02929	1.04342	1.03393
13.3	1.01994	1.01728	0.953764	0.987332	1.06447	1.03681	1.03809		1.02777	1.05231		1.02621	1.02833	1.00467	1.02125	1.00726	0.991311	1.01883	1.00697	1.01148	0.988203		1.03417	1.01537	1.04232		1.00378	0.977799	1.0214	1.00667	1.02029	1.0355	1.01295	0.995764	1.00859	0.994758	0.975668	1.00697		0.977224		0.980483		1.01305	0.992885	0.996797	1.01609	1.03604	1.02022
13.333	1.0113	1.01308	0.975455	1.00938	1.06168	1.04224	1.03852	1.04441	1.03015	1.0382		1.01921	1.01488	1.00523	1.01968	1.00023	0.992848	1.02675	1.01058	1.01757	0.992697			1.02641	1.02579		1.01336	0.97253	1.01489	0.987364	1.0207	1.01669	1.02148	1.0057	1.01551	0.991714	0.974302	1.02948		0.97418		0.988882		1.00672	0.993691	1.01476	1.00663	1.03524	1.01397
13.367	0.992932	1.01482	0.973293	1.00194	1.0606	1.01852	1.03048	1.03873	1.03322	1.03774		1.00847	1.01369	1.01666	1.01605	0.997941	0.998897	1.01405	1.01987	1.03185	0.997612		1.02466	1.02267	1.03909		1.00683	0.976521	1.02208	1.00839	1.02745	1.03341	1.01241	1.00606	1.01667	0.99453	0.977434	1.01071		0.977059		0.98588		1.00544	0.986078	0.992602	1.01845	1.02616	1.0108
13.4	0.990537	1.0278	0.968971	1.00619	1.06428	1.02206	1.04124	1.04243	1.04134	1.0437		1.01794	0.975399	1.00904	1.0132	1.009	0.998094	1.03672	1.00286	1.04056	1.00516		1.01708	1.03052	1.02618		1.01132	0.969068	1.02493	1.01428	1.01691	1.0235	1.01817	1.01298	1.0148	1.00564	0.972535	1.01164		0.976895		0.990351		1.00709	0.987454	1.00598	1.01176	1.02713	1.01689
13.433	0.97943	1.01656	0.958797	1.00025	1.0606	1.02991		1.04045	1.03867	1.03838		1.01487	0.995712	0.99793	1.01723	1.00442	1.001	1.03655	1.01528	1.03101	1.00168		1.01805	1.01498	1.03146			0.964173	1.0262	0.990973	1.00719	1.03258	1.01018	1.00747	1.0148	1.00149	0.968671	1.00129		0.985368		0.983644		1.00544	0.990773	0.986275	1.02041	1.02031	1.0108
13.467	0.979162	1.00706	0.973108	0.993425	1.06752	1.02888	1.03617	1.03503	1.04876	1.04965		1.02536	0.997856	1.00174	1.01477	0.99637	0.987131	1.03737	1.01487	1.0239	1.00067		1.02869	1.02509	1.01628		1.01929	0.970721	1.01991	0.992467	1.00719	1.02653	1.01686	1.01063	1.01799	0.997186	0.978967	1.00261		0.975702		0.976171		0.997079	0.993288	1.01548	1.01845		1.0065
13.5	0.972734	1.01474	0.974899	1.00733	1.05926	1.02767		1.0446	1.03658			1.02024	0.994823	1.00516	1.03176	0.996925	0.9609	1.04552	1.01092	1.02272	0.996173		1.00693	1.02245	1.01628		1.02792	0.973808	1.02964	1.00879	1.01353	1.02409	1.0091	1.0099	1.01239	0.989836	0.976068	1.01313		0.974577		0.985272		0.995426	0.981953	0.971558	1.01095	1.02673	1.00828
13.533	0.997722	1.00396	0.976798	1.00821	1.05495	1.03198	1.03573	1.03089	1.03035	1.0437		1.01282	0.997296	1.00634	1.03113	0.991627		1.04989	1.00024	1.01561	1.00067		1.01137	1.01382	1.01628		1.01259	0.981636	1.01288	1.01561	0.994428	1.02594	1.00503	0.997469	1.02117	0.999613	0.979933	1.01235		0.984971		0.982653		1.00453	0.986648	0.997517	1.00565	1.01878	1.01729
13.567	0.987072	1.0088	0.976612	1.00953	1.06294	1.0432	1.03004	1.02222	1.01965	1.0415		1.01981	0.985589	1.00618	1.01935	0.980964	1.0006	1.04453	1.01075	1.0358	0.995155		1.01444	1.01794	1.02784		1.02564	0.979827	1.01272	1.00784	1.01568	1.0178	1.01801	0.980767	1.00937	0.987731	0.985729	1.01913		0.991689		0.980576			0.963409	0.991978	1.0094	1.01589
13.6	1.00369	1.00615	0.988948	1.00421	1.0632	1.0438	1.02602	1.02917	1.03421	1.05056		1.00727	0.986942	1.01324	1.03271	0.9966	1.00511	1.033	1.01075	1.01806	0.992697		1.01855	1.01871	1.02879		1.04428	0.986531	1.01886	1.01051	1.0136	1.02997	1.0091	1.00512	1.01403	0.965454	0.994493	1.01235		0.976662		0.991145		0.99602	0.979605	0.969657	1.01805	0.998869	1.03336
13.633	1.00084	1.01429	0.990291	1.00209	1.06294	1.05252	1.03171	1.02764	1.01391	1.05523		1.01427	1.00119	1.01134	1.02299	0.990842	1.00802	1.03556	1.00681	1.02947	0.996594		1.01678	1.02788	1.03241		1.03937	0.99286	1.02769	0.97833	0.998455	1.04072	1.01133	1.00137	1.00036	1.00696	0.976634	1.01819		0.984738		0.974796		0.993991	0.99376	0.99024	1.00092	1.00754
13.667	1.03382	1.01383	0.972923	0.998454	1.05774	1.0338	1.02917	1.02267	1.01489	1.04332		1.01034	1.01504	1.0142	1.04488	0.986099	1.00705	1.02047	1.01215	1.03048	1.0033		1.02355	1.01887	1.02824		1.02013	0.999564	1.01938	1.01412	0.99228	1.02309	1.01671	1.00667	0.999816	1	0.985163	1.01274		0.984971		0.986674		1.01034	0.982022	0.98929	1.00801	1.02463	1.01064
13.7	1.00194	1.00937	0.983097	1.00359	1.0519	1.03838	1.01989	1.01852	1.02539	1.05853		1.00872	1.02388	1.0161	1.02868	0.99156	1.01367	1.01866	1.00895	1.0266	1.00576		1.02742	1.00799	1.02752		1.02361	0.976521	1.02701	1.00901	1.01674	1.02914	1.02523	1.0007	1.00689	1.0079	0.979132	1.02342		0.966831		0.998778		1.00092	0.98048	0.970147	0.999939	1.04166	1.01356
13.733	1.03804	1.01073	0.972213	0.988623	1.05945	1.04166	1.03276	1.01572	1.02855	1.04909		1.01137	1.01679	1.00785	1.03153	0.978443	1.00785	1.02262	1.00385	1.03024	0.999823		1.02355	1.02486	1.0298		1.02319	0.965826	1.02335	1.0018	1.03404	1.00646	1.02116	1.00762	0.999976	1.01846	0.980098	1.00806		0.952763		0.985748		1.00672	0.994496	1.01082	1.00271	1.02463	1.00788
13.767	1.05531	1.0206	0.980225	1.00058	1.06492	1.04769	1.02515	1.02898	1.02806	1.0555		1.01222	1.00277	1.00634	1.01304	0.994473	1.01116	1.03375	1.00623	1.02618	1.01127		1.00509	1.01887	1.02736		1.01497	0.974183	1.01759	0.990649	1.01896	1.01964	1.02985	1.00033	1.01287	1.00282	0.980664	1.01539		0.976662		0.985206		0.993461	0.996441	1.00964	1.00271	1.0248
13.8	1.052	1.01402	0.983205	0.991191	1.06015	1.0533	1.0241		1.03548	1.0555		1.01119	1.01066	1.01039	1.01186	0.99408	1.01875	1.01487	1.00146	1.03125	1.01211		1.02088	1.01491	1.02563		1.01785	0.963488	1.01325	1.02	1.01377	1.01981	1.03615	1.0121	0.998271	0.996958	0.980664	1.02271		0.971465		0.976648		1.0031	0.967937	0.974505	1.00923	1.01027	1.01161
13.833	1.03648	1.00517	0.970422	0.992072	1.06492	1.04476	1.01018	0.997225	1.02063	1.07098		1.01879	1.00508	1.01745	1.01929	1.00497	1.01641	1.01109	1.01075	1.03024	1.00102		1.01758	1.01717	1.03059		1.02276	0.9662	1.00622	1.01506	1.01756		1.0267	0.995032	0.996246	1.009	0.984929	1.015		0.962991		0.976264		0.985695	0.988996	0.994368	1.00116		1.00593
13.867	1.03758	1.01466	0.965837	0.995886	1.06618	1.0508	1.01884	1.01347	1.04114	1.06567		1.01469	1.0066	1.00483	1.0204	1.00821	1.01286	1.01364	1.01494	1.01554	0.994064		1.00316	1.01173	1.02886		1.03031	0.969662	1.01362	0.997247	1.03025	1.01015	1.02148	0.998264	0.988559	1.00392	0.990394	1.01539		0.972027		0.973103		1.00469	0.978063	0.974735	1.0173	1.01469
13.9	1.03602	0.998129	0.962148	0.981176	1.06967	1.07408		1.00481	1.02519	1.05595		1.01854	0.999837	0.997141	1.00894	1.009	1.00294	1.00491	1.01929	1.02779	1.00779		1.0121	0.995022	1.02485		1.01683	0.970192	1.01991	1.01239	1.01657		1.02409	1.0043		1.00431	0.992492	1.01687		0.984902		0.98645		1.01252	0.975883	0.972047	1.00197	0.991253	0.995544
13.933	1.04291	1.00763	0.966918	0.983121	1.06187	1.06287	1.02348	1.01392	1.01944	1.06191		1.01981	0.98757	1.01324	1.00855	1.00062	1.00374	1.00211	1.01929	1.02188	0.986516		1.00703	1.01585	1.04003		1.01929	0.964547	1.02013	1.01295	1.02926	1.01964	1.02908	1.00783	1.00409	1.00259	0.994093	1.02738		0.976593		0.971344		1.00363	0.98155	0.951071	1.01338	0.995976	1.00099
13.967	1.03538	1.01886	0.963228	0.995081	1.07246	1.05537	1.02392	1.01482	1.02112	1.06832		1.0089	1.01329	1.01785	1.00168	1.01799	1.00722	1.0031	1.01157	1.02695	1.0133		1.01227	1.00404	1.01745		1.01996	0.965826	1.0205	1.00518	1.02885	1.03039	1.03093	0.996496	0.99602	0.99032	0.991595	1.01671		0.968847		0.980828		1.00581	0.976688	1.06336	1.01379	0.99252	1.0104
14	1.03758	1.02352	0.959091	1.00341	1.06967	1.06244	1.01928	1.00201	1.02063	1.07052		1.0025	1.00525	1.00309	1.00698	1.00749	1.01383	1.00886	1.01848	1.00186			1.01444	1.0087	1.0184		1.01894	0.964392	1.02663	1.0044	1.02786	1.01443	1.02686	0.989578	0.997178	0.985237	0.982099	1.02022		0.971959		0.987085		1.00438	0.978063	1.03305	1.01143		1.0018
14.033	1.05843	1.0301	0.957115	1.0051	1.06015	1.06805	1.02392	1.01527	1.02519	1.05265		1.0019	1.00755	1.01111	1.01536	1.00046	1.0148	1.02494	1.0179	1.02264	0.993468		1.01774	0.989036	1.01478		1.00301	0.965671	1.02192	1.00479	1.0207	1.0282	1.02647	0.985829	1.00689	0.990869	0.992961	1.01461		0.973084		0.973355		1.0031	0.990538	0.96982	1.01159	1.00047	0.999443
14.067	1.06109	1.01894	0.949102	0.997026	1.04696	1.0533	1.0275	1.01247	1.00726	1.06787		0.991583	1.00986	1.00174	1.01441	1.01381		1.01142	1.01987	1.0218	1.00941		1.00413	1.01717	1.01801		1.00954	0.971909	1.02679	1.02032	1.00719	1.03752	1.01887	0.986713	1.00223	0.996502	0.987965	1.00277		0.977718		0.983924		1.00528	0.986009	1.02997	0.999197	1.0012	1.00082
14.1	1.05044	1.02288	0.950816	0.995521	1.06384	1.0508	1.01971	1.00705	1.0235	1.05861		0.998754	1.00126	1	1.00943	0.997616	1.01868	1.02692	1.0276	1.01124	0.99898		1.01734	1.01733	1.0036		1.02308	0.967014	1.0253	1.01044	1.03001	1.02778	1.02125	0.997746	1.01101	1.00784	0.975902	1.02342		0.972521		0.97891		1.02179	0.991677	1.02941	0.997811	0.990358
14.133	1.04888	1.0427	0.942989	1.00517	1.06967	1.03312	1.02077	1.01833	1.0438	1.06942		0.986812	1.01082	1	1.01228	0.999906	1.01577	1.00944	1.02579	0.996368	0.985498		1.01404	0.997275	1.01289		1.028	0.965954	1.03884	1.01727	1.0207		1.02294	0.997746	1.01403	0.993686	0.979035	1.00745		0.970039		0.972746		1.0022	0.979203	1.02941	1.00156	1.01918	1.01494
14.167	1.05264	1.02954	0.950183	0.998089	1.05755	1.05365	1.02033	1.0177	1.03499	1.06392		0.992358	1.01408		1.00564	0.993429	1.01674	1.02634	1.03056	1.00938	0.973209		1.0121		1.00722		1.01944	0.967233	1.03846	1.00589	1.02128	1.02333	1.02071	1.00893	1.01348	0.99783	0.994162	1.02645		0.975236		0.976834		1.00853	0.971757	0.992535	1.01943	1.00778	1.00277
14.2	1.0431	1.03502	0.955139	0.990385	1.06796	1.05762	1.02794	1.02573	1.0333	1.05		1.0002	1.00198	0.999047	1.01614	0.996667	1.00254	1.01463	1.03154	0.986151	0.991432		1.01694	0.987716	1.01729		1.03537	0.971069	1.02545	1.00306	1.00777	1.03122	1.01795	1.00113	1.01387	1.00236	0.972438	1.00784		0.981625		0.978686		1.01418	0.989732	0.995223	1.00409	1.01027	1.01064
14.233	1.05109	1.03173	0.9573	1.00535	1.07964	1.03562	1.02479	1.02808	1.03449	1.06411		1.00285	1.00142	0.997863	1.00642	0.997453	1.01303	1.01661	1.02579	1.00364	1.00042		1.01541		1.0036		1.01638	0.962557	1.02889	1.01233	1.01312	1.02778	1.01756	0.994729	1.02715	1.01347	0.974205	1.00332		0.983545		0.975365		1.0123	0.986245	1.0439	1.01119	1.01436	1.00966
14.267	1.0542	1.04297	0.938852	0.999594	1.0712	1.03684	1.0233	1.03376	1.04905	1.05394		0.996705	1.00874	0.98945	1.01614	0.983714	1.02683	1.02122	1.03944		1.00042		1.01364		1.00722		1.02579	0.972722	1.03106	1.01727	1.00777	1.02635	1.03201	1.01871	1.00766	1.00479	0.989897	1.01406		0.973714		0.974823		1.03008	0.99094	1.0397	1.01217	1.0109	1.01144
14.3	1.05953	1.03192	0.933634	1.00943	1.0625	1.04434	1.03555	1.0159	1.04261	1.04139		0.994232	1.00683	1.01222	1.01598	1.00354	1.01537	1.01999	1.03467	0.991644	1.00347		1.01267		0.992586		1.01638	0.972193	1.03032	1.01688	1.01114	1.04903	1.01311	1.01091	1.00991	1.00706	0.986032	1.015		0.968915		0.971119		1.023	0.976855	1.00473	1.00548	1.01612	1.00966
14.333	1.06063	1.02908	0.941461	1.01563	1.06187	1.04891	1.03048	1.02356	1.04618	1.04579		1.00822	1.01049	1.00762	1.02324	0.994933	1.02957	1.03013	1.01347	0.992659	1.00288		1.00292		1.00226		1.02477	0.981454	1.03121	1.01005	1.01609	1.04618	1.02071	1.01643	1.01178	1.00236	0.984666	1.01764		0.972754		0.99063		1.02481	0.97823	1.00076	0.99977	1.02038	1.01282
14.367	1.07394	1.02223	0.942541	0.99622	1.06339	1.04666	1.03091	1.02248	1.05746	1.0478		1.00575	1.00858	1.02087	1.0238	0.997846	1.01423	1.02115	1.02178	0.998151	1.0033		1.02218		0.99943		1.01537	0.987473	1.02545	1.0146	1.01254	1.033	1.01795	1.0196	1.00486	1.00314	0.986032	1.02761		0.974509		0.968182		1.01991	0.977828	1.00932	1.00369	1.00954	1.0185
14.4	1.06733	1.02049	0.937771	1.01119	1.06187	1.03959	1.02584	1.01942	1.06587	1.03827		1.00328	1.01184	1.00191	1.02324	0.985841	1.02312	0.998659	1.02218	1.00077	0.981004		1.00856		1.00533		1.02782	0.975654	1.02112	1.01116	1.00794	1.03686	1.01756	1.00805	1.01574	1.01221	0.994562	1.01374		0.974112		0.975656		1.01118	0.977661	0.997517	1.00882	1.01443	1.0142
14.433	1.06953	1.0046	0.953611	1.01207	1.07138	1.03545	1.02225	1.04161	1.03626	1.05349		1.00165	1.01798	1.01706	1.0095	1.01822	1.01109	1.01275	1.02259	0.997731	0.990414		0.998652		1.00249		1.0174	0.969635	1.01768	1.01876	1.00077	1.03585	1.01702	1.0107	1.00821	1.0205	0.985232	1.00658		0.9853		0.963394		1.02821	0.977494	0.985488	0.993488	1.01676	1.01736
14.467	1.07688	1.03037	0.958381	1.01658	1.06536	1.04002	1.01761	1.02637	1.05824	1.03937		1.01275	1.01972	1.02087	1.01653	0.987901	1.00521	1.0163	1.02103	1.00204	1.00186		0.981495		1.011		1.02333	0.971069	1.00848	1.01727	1.00596	1.033	1.01702	1.00238	1.00859	1.00541	0.984666	1.01429		0.990894		0.970643		1.02075	0.992718	1.00116	1.00173	1.02783	1.01988
14.5	1.07954	1.02488	0.961252	1.01853	1.06276	1.04105	1.01464	1.02917	1.063	1.05129		1.00123	1.01719	1.02412	1.00531	1.00275	1.00949	1.01787	1.02062	0.994862	0.993889		0.985034		1.01462		1.02579	0.966329	1.02778	1.01554	1.00456	1.02368	1.0287	1.00061	0.999976	1.01745	0.981133	1.01297		0.984738		0.967481		1.0215		1.0086	0.998385	1.04276	1.01047
14.533	1.07174	1.02095	0.959909	1.02216	1.06276	1.01984	1.02182	1.0335	1.06378	1.06054		1.00557	1.00914	1.01761	1.01369	0.994933	1.00868	0.988043	1.02201	0.99063	0.987781		0.987136		0.997149		1.0313	0.956693	1.01678	1.00361	1.01107	1.01822	1.01371	0.997077	0.990811	1.01557	0.978635	1.02123		0.982256		0.963394		1.00712	1.00147	1.01469	0.989738	1.01779	1.01299
14.567	1.06843	1.02004	0.968817	1.00914	1.06276	1.03562	1.01464	1.03458	1.05853	1.04377		1.00515	1.01408	1.02087	1.00168	0.998727	1.00618	1.02364	1.01987	0.994267	0.991853		0.993177		1.00077		1.02519	0.975745	1.01625	1.01688	1.0063	1.02771	1.01909	1.00524	1.02226	0.999547	0.971472	1.00222		0.974344		0.96764		1.01164	0.995969	1.02157	0.993656	1.04469	1.00788
14.6	1.06934	1.01164	0.964942	1.01941	1.0686	1.03355	1.0066	1.02745	1.07309	1.05394		0.997729	1.01121	1.02333	1.00721	1.0056	1.01046	1.01524	1.02225	0.984644	0.991853		0.987771		1.00226		1.01824	0.962118	1.02583	0.994352	1.00811	1.03258	1.0204	1.00561	1.00503	1.01635	0.968739	1.02193		0.97067		0.954227		1.01036	1.00278	1.00883	0.990717	1.02357	1.01235
14.633	1.0992	1.01209		1.01471	1.0651	1.02838	1.00257	1.03485	1.04635	1.05944		1.00473	1.01082	1.02849	1.01788	1.00537	1.0136	1.01722	1.01732	1.00441	0.987112		1.00349		1.01273		1.0307	0.95978	1.01086	1.01743	1.0152	1.03056	1.01594	0.992141	1.00503	0.997508	0.963108	1.02287		0.969545		0.958857		1.01255	1.00117	1.00637	0.995447	1.03401	1.00277
14.667	1.07752	1.01739		1.02128	1.06339	1.03191	0.994784	1.03828	1.04734	1.05019		1.01539	1.0097	1.02333	1.00855	1.00995	0.996087	1.00684	1.01453	1.00417	1.00084		1.00092		1.00833		1.01147	0.970256	1.02477		1.01124	1.02938	1.01671	1.00671	0.99959	0.998058	0.973004	1.01329		0.973782		0.950458		1.01526	0.993719	0.999879	0.986562	1.03804	1.00529
14.7	1.07798	1.00789		1.00275	1.06339	1.03691	0.998371	1.02349	1.06546	1.0544		1.01395	1.01488	1.02642	1.01045	1.00543	0.995686	0.990941	1.01987	0.991572	1.00025		1.00479		0.99314		1.02435	0.961899	1.02186	1.00989	1.02145	1.02023	1.02355	0.991623	1.00145	0.991097	0.960376	1.00916		1.00351		0.957706		1.00147	0.994122	1.00139	0.99325	1.03089	1.00237
14.733	1.06466	1.02727		1.00914	1.05863	1.03252	1.00826	1.02827	1.06517	1.04909		1.02299	1.0093	1.02087	1.0095	1.00677		1.00504	1.02324	1.00399	0.998805		1.00753		1.01022		1.02968	0.953917	1.02276	1.0146	1.0165	1.0267	1.0154	1.00921	1.00464	0.980703	0.967304	1.00051		0.983613		0.950775		1.006	0.999789	1.02616	1.00328	1.03298	1.00139
14.767	1.07798	1.01448		1.0211	1.06402	1.04123	0.9954	1.02457	1.04992	1.04799		1.01062	1.00699	1.03523	1.01424	0.99935	0.996489	1.00067	1.02736	0.994021	1.00228		1.00302		1.00337		1.0407	0.96062	1.03323	1.01177	1.01947	1.03258	1.01986	0.995524	1.01364	0.987503	0.974702	1.01797		0.976497		0.94014		1.00019	0.976953	1.02276	0.988926		1.00375
14.8	1.0709	1.01137		1.02091	1.04867	1.04891	0.9954	1.03107	1.03606	1.06301		1.01864	1.0093	1.02468	1.01313	0.996898		1.01063	1.01429	0.989297	1.00948		1.01197		1.0081		1.03418	0.957533	1.0161	1.01782	1.0179	1.02326	1.01594	0.996773	1.01785	0.980703	0.969471	1.01135		0.983846		0.951252		1.00977	0.982787	1.02561	0.997	1.01918	1.01
14.833	1.07246	1.00608		1.00932	1.06015	1.06365	0.998552	1.02827	1.03556	1.0566		1.00345	1.01082	1.01357	1.01447	0.985678	1.01343	0.99333	1.0345	0.99892	1.02686		1.0114		0.99692		1.03681	0.958063	1.02096	1.00527	1.03717	1.01133	1.0141	0.997139	1.02445	0.984459	0.975834	1.01829		0.981364		0.945472		0.998166	0.998012	1.02695	1.00467	1.02616	0.998231
14.867	1.06668	1.01375		1.00719	1.05971	1.05719	1.00468	1.03133	1.04725	1.05641		1.01062	1.00795	1.02222	1.01621	0.984337	1.00665	1.0019	1.01783	1.00238	1.00007		1.01978		1.00148		1.02351	0.971315	1.02059	1.01674	1.00678	1.02409	1.01725	0.999273	1.03516	0.980865	0.979933	1.01906		0.988316		0.940458		1.00562	0.998414	1.01856	1.01355	1.02447	1.00001
14.9	1.06824	1.01576		0.998241	1.0545	1.05176	0.989891	1.0187	1.05873	1.05394		1.01412	1.01296	1.01857	1.02308	0.968538	0.999063	1.00667	1.01051	0.990978	0.996173		1.01454		0.989522		1.03452	0.9662	1.01752	1.01242	1.01493	1.01721	1.02208	1.01576		0.983842	0.979367	1.01229		0.993348		0.93653		0.986717	0.989024	1.02751	1.00801		0.999039
14.933	1.0687	1.02654		1.02029	1.05666	1.05219	0.995145	1.0261	1.02506	1.05485		1.01864	1.01511	1.01873	1.03067	0.971451	0.989138	0.999918	1.0129	0.994615	1.00091		1.02292		0.994638		1.02207	0.959277	1.01319	1.01297	1.0207	1.0194	1.02262	1.00634	1.00541	1.0023	0.977434	1.01532		0.99103		0.938606		1.00066	0.986843	1.03741	1.01274	1.02696	1.00553
14.967	1.05383	1.01841		0.996994	1.05882	1.06151	0.999602	1.02999	1.04397	1.06722		1.01864	1.0222	1.0184	1.02459	0.988131	1.00996	1.0093	1.03287	0.996819	1.00846		1.02679		0.988577		1.0274	0.966356	1.01842	0.990448	1.0221	1.02023	1.02154	1.01716		1.0023	0.961342	1.02077		0.985272		0.939691		1.00141	0.985468	1.03629	1.00842		1.00909
15	1.08927	1.00452		1.00275	1.06618	1.06358	0.998552	1.0289	1.0411	1.06191		1.01267	1.02124	1.01436	1.01313	0.968605	1.02359	1.00016	1.01725	0.990906	1.00014		1.01808		1.00226		1.03842	0.963488	1.01662	0.98863	1.01138	1.03073	1.02008	1.00796	1.00991	0.990186	0.979933	1.021		0.991428		0.95157		1.01052	0.98758	1.03701	1.00703	1.02447	1.0142
15.033	1.05695	1.00626		0.998681	1.04803	1.05547	0.9954	1.03305	1.05755	1.06081		1.02914	1.00914	1.03063	1.02269	0.994512	1.00294	1.00098	1.01865	0.993109			1.01614		1.00282		1.02986	0.964767	1.00832	1.00212	1.01138	1.02813	1.01617	1.01097	1.03374	0.985492	0.967139	1.021		0.993745		0.949718		1.01564	0.993483	0.996499	1.01707	1.02913	1.01558
15.067	1.05915	1.00846		1.00275	1.04669	1.06754	1.00319	1.03107	1.05476	1.05265		1.01967	1.01072	1.0069	1.02861	1.00478	1.00391	1.00913	1.02062	0.983384	0.990486		1.0321		0.984406		1.02638	0.977709	1.01281	1.00706	1.01394	1.01839	1.02415	1.00531	1.00812	0.984942	0.9764	1.01158		0.991263		0.959361		1.02309	0.991469	1.05094	1.00565	1.04365	1.01363
15.1	1.06071	1.00891		0.996554	1.05603	1.05608	1.01334	1.04045	1.05784	1.05091		1.00833	1.00993	1.01111	1.017	1.02042	1.00544	1.00337	1.01725	0.997413	1.00355		1.03523		1.00298		1.03561	1.00135	1.01408	1.0095	1.00463	1.02587	1.01785	0.99464	1.02124	0.996436	0.973101	1.00893		0.99646		0.969771		1.02512	0.990969	0.994829	1.01038	1.04212	1.0344
15.133	1.06227	1.02053		1.00657	1.04391	1.05505	0.996015	1.03197	1.05714	1.04935		1.00645	1.00268	1.02793	1.01454	1.00841	1.00237	1.00016	1.02341	1.00011	0.992697		1.01557		0.988739		1.0307	0.975526	1.02995	1.0044	1.00917	1.02872	1.02676	1.01171		0.989086	0.958941	1.01874		0.991661		0.965075		1.01729	0.981343	0.997911	1.00703	1.0406	1.02677
15.167	1.05253	0.99139		1.00356	1.04301	1.05962	1.00555	1.03477	1.04188	1.04935		1.01942	1.00228	1.01666	1.00633	1.0145	0.99689		1.02283	0.992586	0.988203		1.03113		0.989293		1.03418	0.978238	1.01985	1.00761	1.00282	1.01898	1.03029	1.01451	1.01953	0.994008	0.955808	1.01197		0.988946		0.969163		1.02581	0.978023	0.985488	1.00801	1.03867	1.00503
15.2	1.05162	0.99139		1.01126	1.04301	1.04401	0.991812	1.02259	1.03565	1.05751		1.01839	0.998456	1.01913	1.0098	1.00573	1.00802	1.01927	1.01232	1.0056	1.01008		1.02041		0.98851		1.0207	0.962803	1.02164	0.994742	1.01271	1.01613	1.01731	1.01238	1.01673	0.99213	0.952109	1.00971		0.987191		0.964308		1.01564	0.98815	1.00283	1.01234	1.0414	1.01679
15.233	1.0326	1.00108		1.00657	1.06034	1.05005	0.996631	1.01915	1.03782	1.05182		1.02292	0.993607	1.01374	1.00616	1.0126	1.01303	1.00856		1.00273	0.990239		1.01631		0.987174		1.01621	0.99118	1.01947	1.01727	1.002	1.01915	1.01493	1.02106	1.00664	0.991192	0.963137	1.01687		1.00318		0.966544		1.02356	1.00086	1.00765	1.00565	1.04934	1.02166
15.267	1.05896	1.01103		1.01251	1.05235	1.03426	1.00529	1.03656	1.05476	1.0489		1.02581	0.9975	1.01143	1.00996	1.01394	0.99826	0.992071	1.02086	1.00948	0.988799		1.03049		0.988672		1.01417	1.02957	1.02329	1.00173	1.00777	1.02604	1.01454	1.01664	1.0294	0.997213	0.966435	1.01181		1.00741		0.963382			0.984093	1.00361	1.01038	1.04163	1.02677
15.3	1.05961	0.999336		1.0087	1.05019	1.03883	1.01518	1.02917	1.03872	1.05512		1.02069	1.01072	1.02294	1.00443	1.01031	1.00431	1.00583	1.02144	1.00095	0.980829		1.01284		0.988672		1.01782	1.00646	1.02651	1.00911	1.01411	1.02419	1.01085	1.02304	1.02847	1.0023	0.969968	1.01368		0.992388		0.967311		1.01127	0.989927	0.999024	1.00075	1.05945	1.02597
15.333	1.07954	1.01897		1.00506	1.04669	1.02616	1.01116	1.0381	1.04041	1.0478		1.02052	1.00261	1.00683	0.992419	1.01293	0.998094	0.986544	1.01157	0.989891	0.988203		1.0134		0.980884		1.03214	1.0006	1.02434	0.982585	0.998794	1.0226	1.0064	1.01679	1.02287	0.998541	0.959507	1.02193		1.00126		0.962615		1.01264	0.98701	0.9984	1.00784	1.06018	1.01541
15.367	1.04987	1.01103		0.990536	1.04499	1.04919	1.01413	1.04288	1.03843	1.04028		1.01762	1.01066	1.02445	1.017	1.02209	1.01367	1.00385	1.01256	1.0034	0.99498				0.983165		1.01866	0.972064	1.02037	1.0095	1.00695	1.02621	1.00586	1.00738	1.01953	0.997991	0.972301	1.00542		1.00318		0.961147		0.993954	0.979968	0.999418	1.00801	1.04316	1.01793
15.4	1.04831	1.01432		1.00294	1.05235	1.03262	1.02366	1.03675	1.03724	1.04514		1.02154	1.00317	1.01374	1.00364	1.01064	1.01948	1.0092	1.02225	1.00669	0.983287		1.00639		0.986782		1.01621	0.956629	1.02397	1.01005	1.0006	1.01891	1.00863	1.00348	1.01541	1.0044	0.977366	1.01422		0.99742				1.00774	0.978759	1.01597	1.01747		1.01834
15.433	1.06604	1.01057		1.00275	1.04669	1.02305	1.01308	1.03802	1.05755	1.03634		1.00857	1.01098	1.00969	0.998831	1.02169	1.00819	0.977157	1.02916	1.00567	0.987185		1.00776		0.991048		1.01316	0.975681	1.03788	1.01876	1.00316	1.02277	1.00716	1.00208	0.997245	0.993686	0.962405	1.01461		1.00182		0.966927			0.990094	0.996499	1.00703	1.05167	1.02247
15.467	1.01883	0.999524		0.997359	1.05145	1.03201	1.0158	1.02151	1.04537	1.0489		1.01967	1.01448	1.01446	0.994805	1.02287	1.01577	0.964631	1.02242	0.99934	0.973281		1.01574		0.981991		1.01579	0.957314	1.02	0.992238	1.00258	1.02503	1.01531	1.00473	1.00082	1.01408	0.968036	1.00239		1.0043		0.967311		0.995763	0.976412	0.999187	1.00311	1.04252	1.02896
15.5	1.03675	1.00217		0.989032	1.04023	1.02684	1.02008	1.02737	1.03753	1.0401		1.02214	1.00333	1.00604	1.01441	1.02097	1.00334	0.997429	1.03154	1.0012	0.991853		1.01244		0.99395		1.0168	0.953852	1.03317	0.998122	0.996816	1.03334	1.00809	0.99406	1.00268	1.00392	0.958706	1.01461		1.00278		0.96862			0.980704	1.01043	0.995041	1.0516	1.01289
15.533	1.02636	0.997785		0.987968	1.05361	1.03227	1.0283	1.02629	1.05398	1.04101		1.02189	1.01352	1.01271	1.01693	1.02232	1.01206	0.991251	1.0276	1.00669	0.991853		1.00543		0.992452		1.01112	0.946774	1.03115	1.00134		1.03804	1.00977	0.994792	0.993514	1.00994	0.954607	1.01048		0.990798		0.965459		0.976173	0.973662	1.00276	1.00132	1.04269	1.03447
15.567	1.03344	0.997785		0.989214	1.04454	1.03977	1.01797	1.02584	1.0311	1.05292		1.00815	1.01194	1.00374	1.0129	1.02003	0.999063	0.986883	1.0276	1.00424	0.977528		0.998652		0.996232		1.01926	0.949487	1.02719	1.01272	1.0006	1.02813	1.01531	1.00083	0.999722	1.01111	0.953641	1.01726		0.998942		0.966927		0.990335	0.96491	1.00522	0.997168	1.04212	1.01938
15.6	1.02572	0.990935		0.990096	1.06313	1.03209	1.02558	1.02565	1.04041	1.05045		0.990412	1.01003	1.01255	1.01251	1.01466	0.99552	1.00204	1.02875	1.00238	0.977528		0.984232		0.987889		1.01214	0.940381	1.02285	1.00401	0.993439	1.02955	1.00885	1.01076	0.999882	0.997897	0.94841	1.01477		0.987918		0.96415		1.00503	0.976078	1.00751	0.999533	1.04365	1.018
15.633	1.03059	1.006		0.980887	1.06294	1.02795	1.03214	1.01456	1.02872	1.04825		1.00296	1.00755	1.00795	1.01843	1.02745	0.996489	1.00071	1.02324	1.00196	0.98592		0.991809		0.995907		1.01459	0.944901	1.0156	0.994352	0.989482	1.02368	1.00939	1.01539	1.0012	1.00923	0.939081	1.01422		0.982557		0.965075		0.994858	0.979231	1.00964	1.0072	1.04951	1.02093
15.667	1.01754	0.996499		0.983014	1.05298	1.04666	1.02645	1.01997	1.0311	1.02325		0.98974	1.0031	1.00318	1.01954	1.00953	0.993582	1.00944	1.03195	1.0007	0.989817		0.97472		0.997244		1.01951	0.956345	1.0174	0.988307	0.992449	1.02267	1.00955	1.01914	1.01059	1.01548	0.941813	1.0238		0.991195		0.977338		1.00103	0.987177	1.00158	1.00288	1.05064	1.01444
15.7	1.02085	1.01084		1.00073	1.05145	1.04605	1.02899	1.01717	1.02228	1.03919		0.984617	1.00158	0.991125	1.01212	1.01316	1.0148	1.00112	1.03631	0.995384	0.999823		0.989873		0.989455		1.02137	0.940536	1.01634	0.996466	1.00043	1.02468	1.01661	1.01326	1.00586	1.00586	0.946644	1.0139		0.992785		0.982959		0.997946	0.970411	1.01557	1.00859	1.05064	1.01793
15.733	1.02462	1.01523		0.992406	1.05361	1.0313	1.02164	1.02917	1.04139	1.03653		0.994686	1.00557	1.01065	1.00927	1.01852	0.993014	0.989583	1.05111	0.996572	0.984902		0.998818		0.989293		1.02993	0.951605	0.998841	0.999455	0.99211	1.03056	1.0014	1.01201	1.00082	1.01415	0.954041	1.02261		0.996062		0.969388		1.0045	0.984663	1.01748	1.00997	1.04325	1.01679
15.767	1.01222	1.00289		0.979565	1.04948	1.02941	1.02225	1.03765	1.03922	1.03497		0.992213	1.00383	1.00128	1.01307	1.01568	1.0018		1.03426	0.992094	0.994908		1.02292		1.00614		1.02154	0.959588	1.00101	0.995685	0.995897	1.02729	1.0077	1.01436	1.0068	1.0204	0.966835	1.02074		1.00973		0.973858		1.00992	0.989191	1.0102	1.02017	1.06413	1.02872
15.8	1.02195	0.995402		0.994716	1.04454	1.03459	1.0212	1.02439	1.0297	1.03588		0.990588	1.01346	1.00089	1.01457	1.01591	0.998495	1.02098	1.03426	0.9915	0.986763		1.01808		1.0037		1.0246	0.959807	1.01275	0.974264	1.00801	1.02646	1.01547	1.00723	1.00712	1.0036	0.974067	1.02191		1.00685		0.967919		1.00194	0.997776	1.00617	1.01487	1.04382	1.02247
15.833	1.01066	0.994117		0.991707	1.04517	1.0583	1.02225	1.02465	1.04951	1.03763		0.987091	1.02341	1.00184	1.0077	1.00714	0.997928	1.00903	1.03722	1.00231	0.988203		1.00663		0.998809		1.02435	0.960711	1.00138	1.00306	1.0108	1.01773	1.02399	1.01664	1.01232	1.00641	0.98043	1.02791		1.00901		0.971464	0.984235	1.00593	0.985871	0.997939	1.02433	1.04728	1.0219
15.867	1.01864	0.99302		0.995339	1.04948	1.06115	1.01595	1.0205	1.0409	1.03433		1.01447	1.01154	0.999932	1.00217		1.01447	1.00985		0.9915	0.999299		0.981964		0.98685		1.0313	0.962519	1.02053	0.979757	1.01493	1.04788	1.02192	1.00723		1.01172	0.955008	1.02658		1.00805		0.969453	0.981737	1.00737	0.988052	0.991218	1.01038	1.04069	1.0219
15.9	1.0248	0.994571		0.997026	1.04733	1.04658	1.00982	1.01094	1.03417	1.02792		1.00158	1.00422	1.00969	0.991498	1.01646	1.01059		1.03722	0.997833	0.991504		0.991476		1.00999		1.01866	0.954163	1.03713	0.965714	1.01715	1.01974	1.01731	0.999058	1.01683	1.00492	0.969002	1.0339		1.00709		0.981557	0.991634	1.00593	0.991941	1.00728	1.00957	1.03966	1.01938
15.933	1.01883	0.995214		1.00172	1.05666	1.07176	1.01515	1.03006	1.04229	1.04249		1.01267	1.0121	1.01104	1.00446	1.01512	1.00358	1.00385		0.994369	0.987185		1.00977		1.00771		1.0201	0.957624	1.02651	0.998284	1.00992	1.04242	1.01378	1.01826	1.01249	1.00625	0.975599	1.03842		1.00709		0.976543	1.0033	1.0079	0.977689	1.00974	1.01274	1.04062	1.02425
15.967	1.01553	0.99302		1.0066	1.059	1.04658	1.02609	1.00679	1.04348	1.02526		1.01932	1.01656	1.00897	1.0005	1.02847	1.02931	1.01678	1.0277	0.99521	0.972612		1.0121		1.00425		1.04323	0.969068	1.02629	0.974426	0.998455	1.02461	1.00732	1.00848	1.02017	0.996636	0.979064	1.03429		1.01963		0.973223	0.9971	1.01264	0.98319	1.01203	1.02531	1.03235	1.0258
16	1.02195	0.994383		1.00022	1.0458	1.04701	1.00754	1.02005	1.03774	1.02261		1.03186	1.02038	0.995957	1.01212	1.00936	1.01333	1.02733	1.03106	0.99521	0.975667		1.0117		0.97655		1.01094	0.963049	1.03623	0.989573		1.02201	1.02084	1.01966	1.03104	1.00946		1.0491		1.00652		0.984017	1.00177	1.02876	0.9793	1.01013	1.02554	1.02946	1.02677
16.033	1.0191	0.963961		0.996144	1.06313	1.05323	1.01743	1.01915	1.03556	1.02902		1.01787	1.01679	1.01834	1.01631	0.995393	1.03068		1.02589	0.99521	0.978371		1.00606		0.985837		1.01179	0.957779	1.03279		0.995487	1.02402	1.01248	1.00208	1.0093	1.00586		1.04442		1.00805		0.969519	0.991468	1.02515	0.98651	0.991775	1.02375	1.02271	1.02734
16.067	1.0202	0.984242		0.98224	1.05469	1.06383	1.01428	1.00544	1.04249	1.02746		1.01582	1.01273	1.00398	1.00564	0.998172	1.00986	1.00607	1.03559	0.984398	0.96854		1.01267		0.991345		1.02154	0.953788	1.02846	0.991458	0.997875	1.01797	1.00971	1.00649	1.02654	0.991164		1.03671		1.02347		0.975683	1.00257	1.02062	0.984732	1.01583	1.02277	1.03484	1.01598
16.1	1.02572	0.986437		0.991889	1.04904	1.05408	1.01218	1.01131	1.03893	1.03095		1.02221	1.01392	1.00223	1.00485	0.985381	1.0122	1.02255	1.03419	0.992761	0.966082		1.0059		0.987727		1.01705	0.959432	1.02143		0.995247	1.0267	1.01101	0.997594	1.02204	0.996636		1.03087		1.01188		0.966582	0.991869	1.01588	0.993719	1.01298	1.0218	1.02882	1.01753
16.133	1.01332	0.99968		1.00172	1.059	1.05555	1.03222	0.99543	1.0516	1.02041		1.02221	1.01639	1.00723	1.00272	0.988456	1.00809	1.00665	1.02113	0.994369	0.972016		1.01951		0.994018		1.01358	0.953788	1.03369	0.998284	0.997056	1.0194	1.01101	0.998692	1.01605	1.00211		1.029		1.00053		0.972138	1.00603	1.03207	0.988788	1.00285	1.02392	1.03604	1.02516
16.167	1.01001	0.987157		1.00623	1.05316	1.0533	1.02609	1.00256	1.0411	1.02811		1.01479	1.01066	1.00342	0.995849	0.992806	1.00882	1.02296	1.01299	1.01449	0.975739		0.996951		0.996461		1.0134	0.970502	1.01439	0.997503	0.993339	1.0267	1.01194	1.00119	1.01737	1.00289		1.035		1.00229		0.963421	0.976671	1.02771	1.00499	1.00515	1.03892	1.0395	1.02143
16.2	1.02131	0.986969		1.0073	1.04364	1.04769	1.01682	1.00301	1.0409	1.03232		1.01292	1.01257	1.02175	0.999252	1.00076	1.01003	1.01142	1.01973		1.00456		0.997919		0.990171		1.01425	0.96704	1.00467	1.00456	0.994088	1.03922	1.00357	1.00457	1.01567	1.00742		1.03032		1.0106		0.971437	0.994367	1.00503	0.995831	1.00056	1.02318	1.02793	1.01672
16.233	1.02728	0.981938		1.01332	1.0493	1.05873	1.02022	0.98975	1.04922	1.02655		1.01479	0.995848	1.00128	0.997191	1.00037	0.993484	0.991732	1.02466	1.00595	0.981076		1.00646		0.997406		1.01916	0.972155	0.99748	1.00323	0.993099	1.01251	1.01139	1.00811		0.98647		1.04458		1.00629		0.970894	0.994133		1.00385	1.00341	1.02041	1.03411	1.02533
16.267	1.00872	0.994461		1.01287	1.0493	1.05898	1.01769	0.988218	1.0418	1.03031		1.01334	1.01066	1.00818	0.996961	1.01047	0.99736	0.997909	1.0213	1.0014	0.997612		0.993647		0.999687		1.02737	0.964857	1.01656	0.976149	0.990132	1.01881	1.02323	1.00244	1.0149	0.997414		1.04403		0.99709		0.975524	0.986734	1.03192	1.00344	0.998428	1.02318	1.02946	1.01494
16.3	1.01534	0.98943		1.02252	1.04517	1.05958	1.01979	0.994532	1.03893	1.02545		1.01914	1.01415	1.00476	1.01008	1.00187	1.00244	1.01818	1.0282	1.00241	1.00643		1.0076		0.995125		1.02569	0.947239	1.02486	0.975206	0.987913	1.02242	1.01162	1.01326	1.00892	0.995536		1.04139		0.995568		0.966966	1.00266	1.02755	1.01397	1.00967	1.02203	1.01363	1.02768
16.333	1.01644	0.992078		1.01801	1.05101	1.06166	1.01979	1.00499	1.02991	1.03581		1.02674	1.0097	1.01508	0.99768	1.01293	1.00809	1.0289	1.01966	1.00588	1.00948				0.991898		1.03678	0.954692	1.02539	0.999226	1.01295	1.01595	1.01047	1.00921	1.02561	0.996475		1.04816		0.991496		0.987244	0.985768	1.02115	0.999387	1.00872	1.02277	1.02158	1.02492
16.367	1.01598	1.00112		1.01119	1.04993	1.05398	1.02084	1.01041	1.0509	1.01904		1.02179	1.01949	1.00476	1.0074	1.01515	1.02075	1.02156	1.01827	0.997515	1.01584		0.98737		0.987174		1.02348	0.963798	1.04199	0.995456	1.00958	1.01453	1.01216	1.00582	1.00798	0.993592		1.04458		0.991894		0.973448	1.0054	1.00827	1.00814	1.00737	1.01926	1.04109	1.02062
16.4	1.02948	0.991169		1.01207	1.0493	1.05958	1.02653	1.01672	1.05209	1.03031		1.01932	1.01471	0.996352	1.00439	1.02107	1.0264	1.04241	1.02164	0.987718	1.02567		0.998085		1.0137		1.03492	0.957624	1.02105	0.967047	1.01336	1.0115	1.02899	1.00369	1.01412	0.995308		1.04739		0.990372		0.974439	0.998964	1.01663	0.996234	1.00833	1.02456	1.02447	1.02492
16.433	1.01975	0.996467		1.00268	1.04301	1.05794	1.02522	1.00933	1.0621	1.03535		1.01377	1.02507	1.01413	1.00289	0.996112	1.01374	1.02412	1.01786	0.985443	1.0138		0.98784		0.988281		1.0333	0.958683	1.02951	1.00911		1.01293	1.01808	1.00723	1.01023	1.00039		1.04871		0.981501		0.970577	1.00073	1.01226	0.996803	1.01482	1.02872	1.03973	1.02395
16.467	1.02838	1.00214		1.01225	1.0493	1.05751	1.02443	1.01366	1.05923	1.03755		0.999354	1.01161	1.00246	1.00842	1.00488	1.02309	1.01456	1.01466	0.997269	1.02567				0.991507		1.03881	0.952664	1.03056	1.00856	1.00562	1.01981	1.0323	1.00671	1.00216	1.00625		1.03048		0.994773		0.977124	1.02133		0.996234	1.0213	1.02456	1.03098	1.03474
16.5	1.02903	0.999304		1.02164	1.05729	1.06441	1.02294	1.01628	1.05755	1.04946		1.01582	1.01042	1.01643		1.00393	1.0122	1.02767	0.998393	0.983588	1.00948		1.01347		0.995516		1.03127	0.965232	1.02697	0.97693	1.0076	1.01981	1.01025	0.997291	1.01249	1.00531		1.03516		0.99454		0.981053	1.00813	1.01844	0.982787	1.02589	1.02636	1.02906	1.03612
16.533	1.03013	0.996655		1.00968	1.05082	1.07294	1.02041	0.999314	1.05299	1.04305		1.0037	1.01408	1.01794	1.00652	1.00828	1.01293	1.0233	0.997406	0.992964	1.00948		1.01137		0.990954		1.03449	0.954847				1.02284	1.02616	1.01134	0.99943	0.997575		1.02465		1.00901		0.977349	1.00756	1.00843	0.994858	1.02114	1.02832	1.02882	1.0181
16.567	1.02168	0.992078		1.01332	1.04777	1.05709	1.01577	1.0013	1.04319	1.04654		1.0066	1.00676	0.99612	1.00557	1.00465	1.00712	1.02429	1.00891	0.993211	1.02423				1.00425		1.02611	0.955002	1.02173	1.00778	1.00719	1.02527	1.01333	1.00317	1.01326	1.00062		1.0329		1.00765		0.982746	1.0062	1.00465	1.00854	1.02478	1.04169	1.02377	1.02418
16.6	1.02857	0.996012		1.00348	1.03825	1.06933	1.02084	1.00481	1.0434	1.04791		1.00575	1.01138	1.00207	0.997191	1.00275	0.999935	1.00378	0.999788	0.996254	0.992522		1.01524		1.01888		1.03509	0.965323	1.02353	0.994514	1.00043	0.999748	1.02278	1.00156	1.01474	1.00101		1.03274		0.996062		0.976806	1.01206		1.01089	1.02557	1.03027	1.04448	1.02264
16.633	1.02857	1.01054		1.00455	1.04993	1.05812	1.02653	1.01915	1.03409	1.04461		1.00865	1.00158	1.00611	1.00865	0.996993	1.00655	1.02627	1.00775	1.00588	0.994137				0.991736		1.03467	0.950417	1.01777	1.00966	1.00323	1.01797	1.01925	1.01738	1.00969	0.994208		1.01755		0.99838		0.975881	1.00023	1.0079	0.994289	1.03507	1.02929	1.03052	1.03538
16.667	1.03876	1.00835		1.00649	1.05487	1.05605	1.02084	1.01545	1.0429	1.04681		1.00515	0.984073	0.997699	0.997585	0.999513	1.01437	1.03402	1.01095	0.997935	0.984305		1.01798		1.01243		1.03593	0.960957	1.02353	1.00417	1.00282	1.0115	1.01849	0.999425	1.01287	0.998352		1.01326		0.998215		0.969558	0.999268		1.01542	1.03301	1.02554	1.03324	1.03067
16.7	1.02967	1.00899		0.994716	1.05855	1.06416	1.03352	1.00806	1.05201	1.05432		0.997554	1.00597	1.00286	1.00011	1.0056	1.00792	1.03723	1.01333	0.992268	1.0027		1.02282		1.00204		1.03042	0.959368	1.01163	0.980309	0.997296	1.02569	1.02202	0.990007	0.996952	0.991942		1.01778		1.00669		0.967098	1.00997	1.003	1.00287	1.02422	1.04193	1.0228	1.02442
16.733	1.02766	1.00305		0.988333	1.04491	1.04423	1.02617	1.01482	1.05082	1.06028		0.996953	0.986217	0.998489	1.0148	1.0161	1.0264	1.0462	1.01851	1.00206	0.996522		1.01991		1.01778		1.02449	0.958245	1.01507		0.998285	1.01234	1.01219	0.999791	1.00689	1.00625		1.02191		0.999175	0.981829	0.96432	0.990171	1.00331	0.978092	1.02898	1.02987	1.03773	1.01955
16.767	1.02214	1.01209		1.00029	1.05658	1.03777	1.0407	1.00869	1.01547	1.06623		0.997378	0.990834	1.00707	1.0186	1.00125	1.02309	1.04719	1.01595	0.994717	0.986094		1.01701		1.00966		1.04043	0.973305	1.00857	0.999455	0.990541	1.00444	1.0231	1.01753	1.00557	1.01211		1.02229		1.00381	0.98167	0.970034	1.00007	1.00225	1.0015	1.03127	1.03027	1.03251	1.0262
16.8	1.03941	1.01319		1.00888	1.0529	1.05044	1.03334	1.01654	1.02478	1.05652		1.00865	0.993703	1.00913	1.01424	1.00812	1.02212	1.04463	1.01612	1.01144	0.994588		1.03507		1.00605		1.02755	0.985653	0.998841	0.986583	1.00323	0.999575	1.01849	1.00899	1.01271	1.01438		1.02923		1.00805	0.999469	0.974664	1.00707	1.01385	1.01089	1.02993	1.0346	1.03813	1.02133
16.833	1.02499	1.00816		0.990901	1.04922	1.05277	1.04262	1.00697	1.03478	1.05478		1.01112	0.995055	1.00302	1.01598	1.01041	1.02583	1.04282	1.02327	0.999022	0.989076		1.01661		1.01155		1.03186	0.979479	1.02121	1.01122	1.02094	1.02166	1.0244	0.997809	1.01699	1.00797				1.00556	0.979437	0.975683	1.00673	0.997352	0.998012	1.02344	1.03125	1.04681	1.01817
16.867	1.01636	1.00203			1.06763	1.05941	1.03483	0.988481	1.02716	1.04351		1.00473	0.995452	1.01715	1.00832	1.00583	1.02212	1.03129	1.01571	0.999022	0.991112		1.02265		1.01612		1.03102	0.964044	1.01058	1.00401	1.00702	1.03317	1.01664	0.991257	1.00371	1.01211		1.02042		1.00517	0.995993	0.964665	1.01213	0.993515	1.00539	1.01426	1.03223	1.03813	1.0331
16.9	1.01986	1.01436		0.990901	1.05595	1.0413	1.03613	1.00806	1.02547	1.0731		1.0078	1.00485	1.0139	1.00832	1.01191	1.01123		1.02926	1.00231	0.972293		0.997753		1.01038		1.02365	0.965542	0.995556		1.00282	1.03216	1.01126	0.998907	1.01364	1.0161		1.02984		0.989577	0.989677	0.961503	0.999336	1.00022	1.00814	1.01885	1.04227	1.02826	1.0335
16.933	1.00681	1.01418			1.06179	1.05312	1.03657		1.03429	1.06779		1.01462	1.00215	1.00374	0.996703	1.00717	1.02309	1.03763	1.02548	1.00865	0.992377		1.01371		0.996366			0.961551	1.00116	1.01311	0.991121	1.02468	1.0181	0.997505	1.01194	1.0046		1.03507		0.995171	1.00138	0.991808	0.997804	0.994044	1.00093	1.0175	1.0297	1.04119	1.02214
16.967	1.00883	1.01107		0.989214	1.05614	1.05044	1.03001	0.99543	1.01883	1.05478		1.02161	0.981368	1.01755	1.00073	1.00449	1.03125	1.04398		0.998674	0.986022		0.995416		1.01344		1.03263	0.954473	1.00274	1.00628	1.00043	1.03258		1.00016	1.00393	1.02383		1.03071		0.992291	1.0174	0.993117	1.01373	1.00188	0.996636	1.02075	1.03362	1.03517	1.03797
17	1.00993	1.00139		0.996478	1.06852	1.05087	1.03762		1.02289	1.0676		1.00268	0.979224	1.00588	0.999387	1.00449	1.01905	1.03327	1.02943	0.994615	0.98992		1.00807		0.99943		1.01365	0.949048	1.00454	1.01632	0.997056	1.02973	1.01311	0.98367	1.00634	1.01195		1.03336		1.00252	0.996376	0.98108	1.01043	0.994044	1.0019	1.01616	1.02946	1.02433	1.03229
17.033	1.00331	1.00294		0.993287	1.06116	1.04905	1.03911	0.997596	1.01694	1.0665		1.02656	0.992679	1.00223	0.997882	1.00125	1.02236	1.03368		0.993355	1.00323		1.01291		0.999201		1.02635	0.957779	1.00835	1.01028	1.00183	1.01554	1.0118	1.00302	1.01705	1.01101		1.03087		0.999805	1.00939	0.957706	1.02483	1.0064	1.00797	1.02265	1.04757	1.03686	1.02661
17.067	1.01085	1.01308		1.00737	1.04706	1.05277	1.04418		1.01576			1.02094	1.00366	1.01199	1.00246	0.993985	1.03462	1.0261	1.0245	1.00417	0.999329		1.00573		1.00627		1.02449	0.960337	1.00169	1.01256	1.00364	1.03418	1.01164	0.995738	1.00564	1.00421		1.03687		0.994609	1.00569	0.965021	1.0217	1.00368	0.991136	1.02265	1.03321	1.03068	1.0301
17.1	1.02039	1.01372		1.01676	1.05056	1.04802	1.04269	0.993263	1.02269	1.07025		1.00635	1.01019	1.00739	1.00001	0.998172	1.0247	1.01299	1.02211	1.00434	0.995679		1.01057	1.02579	1.01673		1.02246	0.970347	1.01702	1.02104	0.986924	1.03435	1.00067	0.99464	1.01705	1.00327		1.03913		0.997488	0.997143	0.959849	1.0118	1.00512	1.00539	1.01101	1.04227	1.02739	1.02872
17.133	1.0215	1.00513		1.008	1.04904	1.06819	1.04077	0.989116	1.0215	1.05853		1.00098	1.01171	1.00588	1.00894	0.988063	1.02373	1.01142	1.02014	1.00172	0.995082		1.01	1.02805	0.998714		1.01839	0.955505	1.00984	0.983594	0.989312	1.02847	1.01495	0.995006	1.01557	0.995536		1.03274		0.990372	1.01	0.966013	1.01623	1.00624	1.00401	1.01655	1.02693	1.02779	1.0297
17.167	1.02416	1.02231		1.01225	1.04643	1.06759	1.04331	1.0013	1.01863	1.04927		1.0078	1.01362	1.02175	0.998112	0.990746	1.03172	1.03153	1.02786	0.987688	1.00432		1.00493	1.02975	1.008		1.03	0.951889	1.01163	1.01028	1.00009	1.01143		0.998086	1.0214	0.996314		1.03952		0.994773	1.00815	0.956528	1.01896	1.00097	1.01357	1.01505	1.0448	1.02088	1.01655
17.2	1.01423	1.00385		1.01207	1.05684	1.05405	1.03237	0.992814	1.03347	1.06274		1.02009	1.00979	1.0093	1.00073	0.993036	1.02066	1.02518	1.03559	1.01641	1.00432		1.01331	1.03294	1.00028		1.01993	0.957378	1.01634	1.00157	1.00849	1.02461	1.0118	1.01567	1.01635	1.0046		1.01671		1.00364	0.987351	0.958989	1.01157	1.01039	1.02095	1.01639	1.04993	1.01509	1.0099
17.233	1.04105	1.00676		1.01632	1.05469	1.06302	1.03806	1.00697	1.03298	1.06164		1.00695	1.0125	1.01065	0.994087	0.990353	1.01832	1.0218	1.02705	1.0007	0.993889		1.01564	1.04211	1.00272		1.02646	0.957753	1.01163	1.01821	1.00948	1.01731	1.01365	1.01619	1.02381	0.997803		1.02561		0.985902	0.988276	0.973103	1.0205	1.00768		1.01426	1.03892	1.00851	1.03319
17.267	1.02047	1.00018		1.00906	1.05684	1.0543	1.04208	0.991731	1.03249	1.061		0.994159	1.02229	1.01692	0.997164	1.00141	1.02179	1.01282	1.03559	1.00476	1.01517		1.02749	1.03596	1.00706		1.01256	0.958876	1.00857	1.00423	1.01047	1.02277	1.00512	1.01619	1.02474	0.988736		1.03854		0.993813	1.00445	0.971251	1.00867	0.997507	1.00669	1.00951	1.03754	1.01526	1.01007
17.3	1.01184	1.00612		1.01889	1.04104	1.06784	1.04016	1.00174	1.03368	1.05944		1.02069	1.01035	1.00565	1.00459	1.01721	1.02664	1.02931	1.02171	1.00459	1.00288		1.00573	1.03838	1.00839		1.02095	0.947058	1.02533	0.996466	1.00132	1.03209	0.997899	1.01067	1.02287	1.00327		1.03574		0.989179	0.977878	0.968856	1.00963	1.0073	1.00257	1.0118	1.03754	1.01606	1.00358
17.333	1.0156	1.02394		1.00224	1.04212	1.07587	1.0294	1.01437	1.04368	1.0643		0.98649	0.992843	0.999306	1.01186	1.0052	1.01671	1.03286	1.03698	1.00704	1.00618		1.00106	1.03612	1.00038		1.01874	0.948336	1.01702	1.01899		1.0252	1.00143	1.01363	1.03188	0.995536		1.01719		0.993813	0.992201	0.971251	0.991371	0.998037	1.01333	0.997247	1.03402	1.0122	1.02492
17.367	1.02774	1.01206		1.01376	1.05208	1.07483	1.03719	0.99868	1.02675	1.0709		1.01037	0.990931	1.00391	1.01336	1.00291	1.0251	1.02033	1.03321	1.01438	1.00355		1.00299	1.03931	0.997378		1.00544	0.942756	1.0269	1.00745	1.00033	1.02479	1.01441	1.03173	1.02738	1.00062		1.01648		0.997886	0.987034	0.968856	1.0102	1.00512	1.0024	1.01196	1.03892	1.00867	1.02378
17.4	1.02994	1.0096		1.02377	1.04625	1.06319	1.03929	0.999128	1.0313	1.05944		0.998857	1.00359	1.01041	1.0098	0.998727	1.01671	1.02033	1.02681	1.00382	0.994908		1.01815	1.02937	1.01162		1.02449	0.942537	1.02533	0.997637		1.01001	0.996976	1.02533	1.03259	0.997025		1.01351		0.985175	0.979793	0.974796	0.992172	1.01604	1.00451	1.00357	1.04382	1.01293	1.01299
17.433	1.02948	1.02129		1.0142	1.04041	1.05009	1.02371	0.988667	1.0313	1.06229		1.01472	1.02549	1.0116	1.02315	1.01777	1.01614	1.01316	1.01728	1.0077	0.998456		1.03427	1.04079			1.03492	0.940728	1.02167	1.008	0.999924	1.0043	1.01441	1.01731	1.01651	0.989059		0.996773		0.99805	0.985343	0.974955	0.998204	1.01167	0.980301	1.01006	1.03933	1.02031	0.999108
17.467	1.02682	1.00366		1.00649	1.04993	1.06112	1.04331	0.98	1.01723	1.07154		0.999705	1.02453	1.00374	1.01493	1.00425	1.01905	1.03228	1.02582	1.00018	0.992522		1.03837	1.03403	1.02909		1.02102	0.93923	1.02675	0.998741	0.97942	1.00347	1.01464	1.04102	1.03127	1.00078		1.00971			0.982026	0.985524	0.977208	1.02274	1.01431	1.00223	1.03419	1.01084	0.999512
17.5	1.02792	1.00915		1.00569	1.04536	1.06276	1.04479	0.99416	1.02277	1.05679			1.02645	1.00144	1.01281	1.01911	1.01751	1.01596	1.02204	1.02401	0.995576		1.02435	1.04134	1.02743		1.03534	0.945404	1.03326	0.999684	0.987913	1.00941	1.01986	1.03011	1.03391	0.976237		1.01561		1.00755	0.993509	0.984663	1.00633	1.00911	1.00589	1.00587	1.04129	1.01742	0.99578
17.533	1.03564	1.0012		0.990096	1.04993	1.07001	1.04077	0.991545	1.02614	1.05459		1.00158	1.02143	1.00279	1.02063	1.02369	1.02042	1.02825	1.03354	1.02604	0.997438		1.02065	1.02705	1.01719		1.04246	0.949551	1.03632	0.99419		1.01303	1.01317	1.02591	1.0204	0.990936		1.00736		0.994211		0.985907	0.976808	1.00527	1.00273	1.01885	1.04169	1.0232	0.99521
17.567	1.02922	1.00933		1.01002	1.04275	1.05587	1.02432	0.98325	1.04278	1.0687		1.00815	1.02143	0.982876	1.01889	1.00694	1.03058	1.01456	1.02303	1.02156	0.986414			1.03699	1.02537		1.03611	0.951204		0.993019	0.989892	0.992199	1.02447	0.999853		0.987181		1.01335		0.989014	0.996508	0.977574	1.0172	1.00986	0.997235	0.992495	1.03223	1.01533	0.989765
17.6	1.03876	1.0149		1.02579	1.04167	1.07483	1.03632	0.987583	1.02683	1.05102		1.00585	1.01913	1.00279	1.00728	1.00354		1.01415	1.02541	1.01928	0.993962		1.01968	1.04056	1.02026		1.02425	0.95557	1.04119	1.0044	1.01814	1.01126	1.01578	0.988669	1.02458	0.986242		1.01842			0.982792	0.980735	0.987106	1.01438	0.981038	0.997247	1.04422	1.01862	0.994068
17.633	1.03583	1.01902		1.0171	1.03279	1.06312	1.03798	0.999391	1.03901	1.05853		1.00977	1.02335	1.00986	1.01281	1.00946	1.02824	1.01852	1.02837	1.0203	0.987853		1.03951	1.03776	1.02081		1.03162	0.946838	1.03558	0.987364	1.01947	1.00413	1.01448	0.984616	1.0058	0.98077		1.01219		0.99964	0.992266	0.981502	1.00553	1.01332	1.00039	1.0156	1.03264	1.02151	0.996421
17.667	1.03032	1.00495			1.03952	1.04812	1.03063	0.993263	1.04426	1.0643		1.01839	1.0126	0.998748	1.01297	0.98473	1.03058	1.03023	1.02582	1.01946	0.983534		1.02299	1.02953	1.01341		1.01891	0.941943	1.04552	0.992791	1.01667	1.0163	1.01855	1.00485		0.989447		1.01671		1.00772	0.983334	0.992997	0.994836	1.00262	0.99254	1.00967	1.03973	1.01709	0.999581
17.7	1.0283	1.00869		1.01985	1.03736	1.06416	1.02791	0.996962	1.03327	1.05808		1.0102	1.00933	1.00049	1.0415	1.00645	1.02881	1.01374	1.02106	1.01683	0.989293		1.0337	1.03947	1.02042		1.01993	0.955415	1.04679	0.993962	1.01865	1.00757	1.01779	1.00147	1.01332	0.987181		1.02535		0.995568	0.974085	0.969399	0.987272	1.00624	0.993915	1.00246	1.03125	1.02191	0.992355
17.733	1.0385	0.997454		0.992922	1.04212	1.05209	1.01925	1.00417	1.0304	1.05523		1.01002	0.993963	0.999143	1.0525	1.00076	1.02954	1.02347	1.02048	1.01886	0.984799		0.997684	1.03535	1.01664		1.01933	0.947368	1.04066	1.00189	1.01807	1.01143	0.999586	0.998452		0.979604		1.02932		0.994609	0.980718	0.978883	0.988004	0.994639	0.983149	1.01331	1.03068	1.0134	1.00217
17.767	1.02545	1.01554		0.998241	1.04104		1.0399	0.997596	1.0306	1.04992		1.01267	0.999701	1.0089	1.03234	1.00305	1.02276	1.02067	1.01136	1.02824	0.975564		1.01638	1.03854	1.01286		1.01137	0.956474	1.03632	1.00339	1.01016	1.00941	0.999204	1.00324	1.0193	0.985625		1.01881		0.990372	0.985025	0.974029	0.989136	0.985374	0.974565	1.0236	1.0474	1.01107	0.987649
17.8	1.03142	1.00869		1.0211	1.03907	1.05269	1.03211	1.00346	1.03991	1.04332		1.01087	1.02239	1.00128	1.05139	1.00858	1.00251	1.02405	0.997307	1.02418	0.983956		1.02121	1.03216	1.01609		1.01933	0.949021	1.02982	0.999226	1.00958	1.00514	0.994749	1.00839	1.02979	0.989931		1.03235		0.997488	0.984325	0.979809	1.00313	0.984624	0.994484	1.00564	1.03639	1.00409	0.979448
17.833	1.02811	1.00604		1.01578	1.04041	1.05001	1.03063	1.00391	1.04824	1.04992		1.00985	1.00821	1.00509	1.02894	0.994675	1.02994	1.01408	1.01259	1.03212	0.992944		1.01347	1.00661	1.01742		1.01298	0.952108	1.03827	1.00738	1.03049	1.01689	0.986222	1.01552	1.02622	0.99728		1.03197		0.993087	0.987642	0.988367	0.990502	0.990116	0.996262	1.02202	1.03207	0.999433	0.968086
17.867	1.04097	1.01153		1.01658	1.04606		1.03229	0.997148	1.04249	1.05853		1.01992	1.01092	0.99819	1.01676	0.996965	1.01066	1.03081	1.00207	1.02806	0.993118		1.00606	1.00326	1.03104		1.01544	0.93976	1.03288	1.01249	1.02834	1.00757	0.977312	1.00964	1.02545	1.00596		1.0329		0.993251	0.99619	0.988367	0.999433	0.995918	0.993512	1.0331	1.04031	1.00329	0.983012
17.9	1.03013	1.00797		1.02385	1.04625	1.04769	1.02914	1.00193	1.03031	1.05633		1.01395	1.01147	1.00946	1.01447	1.00557	1.00364	1.0149	1.0116	1.02418	0.973281		0.991476	0.98733	1.01892		1.01417	0.950674	1.03415	1.02159	1.02496	1.00774	0.986538	1.0075		0.999386		1.02068		0.986697	0.994499	0.984981	0.998467	1.00858	1.00444	1.0411	1.03696	1.00602	0.989667
17.933	1.04409	1.01527		1.01676	1.07157	1.04726	1.02432	0.994981	1.04655	1.05056		1.00822	1.0305	1.00755	1.01866	0.996084	1.00324	1.02685	1.02548	1.02764			1.00646	0.987877	1.00963		1.02537	0.944126	1.01718	1.0095	1.03254	1.00959	0.98692	1.00272	1.00898	1.00431		1.02403		0.987095	0.997816	0.976105	0.98897	0.998942	0.996429		1.0549		0.987147
17.967	1.03876	1.02057		1.01933	1.05558	1.04459	1.03168	0.987398	1.01932	1.06028		1.01257	1.03535	1.01962	1.02799	0.998929	1.02439	1.04159	1.01735	1.0252	0.974299		0.986403	1.00233	1.01703		1.02273	0.983198	1.02765	1.00644	1.03551	1.0132	0.992838	1.00948	1.01667	1.00032		1.01429		0.98438	1.00337	0.975881	1.00217	0.9942	0.992706	1.03327	1.04071	0.996707	0.989904
18		1.03026		1.01207	1.05621	1.03623	1.04182	0.991282	1.01813	1.05322		1.01275	1.01959	1.01597	1.01866	1.00959	1.0143	1.05477	1.0245	1.02621	0.982094		1.00953	0.975678			1.03172	0.969571	1.02765	1.01649	1.03847	1.00673	1.00398	1.01177	1.02358	1.00227		1.0139		0.990934	1.00352		1.0111	1.01086	0.994248	1.03097	1.03835	1.01276	0.996392
18.033	1.03078	1.04588		1.01632	1.05253	1.03744	1.04795	1.00518	1.01497	1.04726		0.999354	1.02015	1.01653	1.01542	0.997032	1.01116	1.04142	1.02269	1.00662	0.990311		1.02178	0.987877	1.01113		1.01866	0.972813	1.03109	1.02143	1.0252	1.00573	1.00029	1.0089	1.02133	1.00321		1.02574		0.987657	1.00461		1.00393	1.00069	0.980163	1.03841	1.04308		0.995585
18.067	1.03876	1.03794		1.02315	1.06529	1.02951	1.04733	0.987583	1.01666	1.04286		0.985963	1.02421	1.02113	1.01313	1.01172	1.01076	1.00105	1.01891	1.01963	0.998281		1.00776	0.996729	1.01058		1.03137	0.978613	1.02892	1.02465	1.02899	1.01665	1.00289	1.01884	1.01683	1.01852		1.02629		0.993649	1.00053		1.0218	1.00724	0.9864	1.03746	1.04544	0.999764	1.01222
18.1		1.03968		1.00499	1.05837	1.02787	1.04523	0.994532	1.02022	1.04332		0.999778	1.02572	1.01613	1.02001	1.01228	1.01664	1.03624	1.03535	1.01109	0.991576		1.01574	0.988103	1.01381		1.02052	0.984787	1.02495	1.02182	1.02957	1.02009	1.00067	1.02451	1.02117	1.00289		1.02387		0.977429	1.00215		1.02276	1.00272	0.976441	1.03651	1.01592	0.994379	1.01027
18.133	1.04785	1.03767		1.01075	1.06142	1.03098	1.04882	0.993898	1.03003	1.04506		0.999105	1.02764	1.01192	1.01503	1.01362	1.01511	1.01654	1.02664	1.01228	0.98954		1.02469	0.998982	1.01648		1.02358	0.973873	1.01972	1.01444	1.04605	1.01647	1.00344	1.00906	1.01799	1.00648		1.02426		0.978951	1.01223		1.01616	1.00016	0.99247	1.03786	1.02734	0.979616	1.00402
18.167	1.03766	1.03393		1.01075	1.05406	1.02537	1.04523	0.983885	1.03933	1.04772		1.0119	1.02589	1.00502	1.01005	1.01093	1.02406	1.03006	1.01555	1.02369	0.994805		1.013	1.00162	1.01592		1.02621	0.961524	1.02241	1.02088	0.998695	1.01873	1.00659	1.00994	1.01628	1.00554		1.01974		0.973192	1.01632		0.996369	0.997068	0.98033	1.03002	1.04993	1.00677	1.00419
18.2	1.04188	1.02662		1.01056	1.0493	1.02391	1.05117	0.984782	1.02121	1.04176		1.00772	1.00917	1.00772	1.00832	0.998929	1.01728	1.02709	1.03436	1.01127	0.988697		1.02195	1.01398	1.00719		1.02561	0.986001	1.02099	1.01938	1.02718	1.02604	1.00789	1.03673	1.0058	1.00968		1.02465		0.993649	1.00853		1.0103	0.997598	0.984455	1.03232	1.03598	1.01199	0.992661
18.233	1.04188	1.05504		1.008	1.05621	1.02262	1.04085	0.993712	1.02666	1.03801		1.00158	1.01626	1.01002	1.00698	1.00786		1.01835	1.0181	1.01676	0.987432		1.02018	1.00893	1.00396		1.01909	0.977115	1.00977	1.01028	1.0252	1.02301	1.00919	1.00817	1.02265	1.00593		1.02877		0.991894	1.01045		1.00177	1.00287	0.982844	1.03651	1.04054	0.997203	1.01044
18.267	1.04831	1.03366		1.00286	1.05253	1.02012	1.04023	1.00328	1.02863	1.04992		1.00772	0.992147	1.00026	0.994019	1.00328	1.01922	1.03491	1.02813	1.00105	0.991329		1.02952	1.02711	1.01687		1.02231	0.971845	0.994068	1.03563	1.01985	1.02444	1.0168	1.01244	1.01869	0.996864		1.03571		0.982625	1.01431		1.01103	1.0025	0.99361	1.03461	1.04406	0.984106	0.996392
18.3	1.03683	1.05284		1.00348	1.05316	1.01555	1.05222	0.996776	1.02765	1.05212		1.01659	0.973118	1.00446	1.01385	1.01221		1.04685	1.02419	1.01043	0.980902		1.0151	1.02129	1.01404		0.999432	0.965296	1.00903	1.01522	1.02183	1.02569	1.00865	1.02113	1.00953	1.00101		1.03213		0.973754	1.00059		0.993001	1.01741	0.98697	1.03825	1.02163	0.990124	1.00362
18.333	1.06006	1.03722		1.00242	1.05766	1.01616	1.03516	1.00832	1.0324	1.04286		0.993134	0.997488	0.999701	1.0133	1.00534	1.02139	1.05856	1.02082	1.00528	0.983112		1.01083	1.00947	1.02411		1.01698	0.978549	0.99639	1.02982	1.02084	1.03258	1.01849	1.01296	1.02545	1.00101		1.03422		0.986697	1.00113		1.01843	1.02976	0.994012	1.04949	1.04406	0.988361	0.998509
18.367	1.03858	1.048		0.988075	1.05316	1.03469	1.04251	1.02113	1.04012	1.04286		1.00815	1.00418	0.993194	1.03424	1.00724	1.0272	1.02156	1.01745	1.00546	0.990661		0.991339	1.01678	1.02977		1.00392	0.981791	0.997289	1.03586	1.01623		1.02033	0.996988	1.01683	1.0057		1.02013		0.984215	1.01654		1.00306	1.01161	1.00357	1.03287	1.0421	0.986268	0.98698
18.4	1.02222			1.00686	1.04428	1.01427	1.03157	1.02005	1.0315	1.03801		1.0049	0.990167	1.00565	1.00737	1.0021	1.01768	1.02576	1.01425	0.998109	0.979215		1.02518	0.991449	1.01003		1.00129	0.970192	0.998931	1.02825	1.01367	1.04475	1.01795	0.986901	1.01869	1.00117		1.02519		0.98501	1.01061		1.00966	1.02103	0.992873	1.04071	1.0399	0.984739	0.983652
18.433	1.0291	1.03831		1.00003	1.04688	1.02134	1.04067	1.02375	1.04299	1.0382		1.01497	1.01164	1.00105	1.01156	1.02019	1.01978	1.0391	1.03092	0.99895	0.983534		0.993675	1.01701	1.02443		1.00291	0.970566	1.01374	1.01993	1.01309	1.03241	1.02001	0.994551	1.00596	0.997025		1.02519		0.99044	1.02949		1.0025	1.01379	0.988984	1.04087	1.04112	0.987232	0.992661
18.467	1.0404	1.03877		0.994017	1.04517	1.02462	1.02545	1.02547	1.04922	1.04351		0.990061	1.02453	1.002	1.00318	1.01008	1.02349	1.0405	1.00275	1.00199	0.985745		1.01784	1.01794	1.0212		0.998415	0.966575	1.01935	1.02982	1.01047	1.02065	1.01664	1.00339	1.0211	0.998902		1.01507		0.993484	1.0137		1.00773	1.01198	0.985094	1.05519	1.04977	0.98803	0.989904
18.5		1.03018		0.991008	1.04104	1.02815	1.03683	1.02808	1.03417	1.04085		0.981617	1.02437	1.0024	0.994412	0.999648	1.01066	1.03648	0.998393	0.994471	0.997365		1.01551	1.01134	1.03238		1.00308	0.9662	1.02548	1.03225	1.01681	1.02166	1.02001	1.00677		0.99968		1.022		1.00107	1.01925		1.00073	1.01145	0.9914	1.05401	1.03835	0.987232	0.990878
18.533	1.02755	1.04115		1.00403	1.05011	1.03083	1.03849	1.02285	1.02654	1.04506		1.002	1.01609	1.01446	1.00184	1.01165	1.02704	1.04463	0.998971	1.00773	0.980233		1.01921	1.00613	1.02482		0.984692	0.964547	1.01845		1.00627	1.03501	1.02202		1.01676	0.991781		1.02706		0.993155	1.01871		0.995665	1.02018	0.993178	1.04618	1.05645	0.978321	0.984223
18.567	1.02755	1.03914		0.997831	1.04231	1.03765	1.03639	1.02087	1.02269	1.04992		1.0038	1.01649	0.9951	1.0148	1.01545	1.02116	1.04999	0.994207	0.998775	0.979811		1.02235	1.00783	1.0142		1.00427	0.961835	1.02749	1.02432	1.01343	1.0162	1.02294	0.98882	1.0121	0.98647		1.02145		0.999873	1.01702		0.998964	1.02961	1.00273	1.04428	1.0474	0.973501	0.982274
18.6	1.03572	1.01977		1.00616	1.04257	1.03273	1.03237	1.02584	1.0315	1.03645		1.00236	1.01649	1.00374	1.00793	1.01869	1.01648	1.02931	1.00333	0.99979			1.02896	1.01189	1.03505		0.993255	0.964922	1.03527	1.02471	1.00866	1.01519	1.02647	0.999121	1.0149	1.00437		1.00923		0.993319	1.02496		1.0009	1.02455		1.03264	1.04071	0.980649	0.978542
18.633	1.03112	1.02352		1.00209	1.05837	1.02462	1.0286	1.02259	1.04516	1.0338		0.997832	1.01266	1.0024	1.01725	1.00992	1.02583	1.03607	1.00588	0.994297	0.993118		1.01204	1.01569	1.0286		0.99936	0.962209	1.02914	1.012	1.02036		1.01518	1.00906	1.02522	0.994986		1.01055		0.986203	1.02518		1.00516	1.02396	0.9914	1.02386	1.06706	0.984271	0.986172
18.667	1.03333	1.01364		1.01041	1.05038	1.04005	1.01171	1.02845	1.03487	1.05478		1.00091	1.02341	1.01311	1.00374	1.00953	1.03148	1.02231	0.999718	1.00123	0.997016		1.01727	1.00722	1.02348		1.00266	0.958528	1.01941	1.02377	1.02851	1.00545	1.00872	1.00869	1.02818	1.00156		1.0181		0.999311	1.02279		0.997198	1.02471	0.996095	1.02615	1.04324	0.996473	0.981703
18.7	1.02222	1.00971		0.992437	1.04777	1.03858	1.0153	1.02016	1.04774	1.05743		1.01157	1.02341	0.993752	1.0133	1.01466	1.02333	1.0247	1.00547	0.994891	0.994558		1.0089	0.991996	1.02332		0.995711	0.956939	1.02629	1.02793	1.02118	1.01797	1.01425	1.01457	1.02554	0.993108		1.01942		0.999873	1.02726		1.00146	1.01235	1.01099	1.03304	1.04838	0.993746	0.986576
18.733	1.02663	0.998927		0.99926	1.03305	1.03341	1.00516	1.02449	1.021	1.06009		1.00415	1.01147	0.995263		1.00897	1.0243		1.01139	0.997761	0.987606		1.00753	0.977544	1.02749		1.00147	0.969817	1.02771	1.02016	1.02677	0.998984	1.00926	1.00199	1.02351	0.996314	0.978732	1.03368		1.00891	1.00531		1.01273	1.02396	0.998109	1.03304	1.05034	0.984836	0.996155
18.767	1.03241	1.02451		1.00502	1.04041	1.0403	1.01671		1.03843	1.05478		0.993237	1.01092	1.00216	1.00128	1.00478	1.02841	1.01374	0.994715	1.00063	0.988871		1.02115	0.976611	1.02505		1.00333	0.963113	1.03041	1.0226	1.022	0.992689	1.01072	1.00589	1.01528	1.00234	0.988462	1.02223		0.996761	1.02703		0.996963	1.02124	1.0071	1.03209	1.04936	0.981944	0.989333
18.8	1.03085	1.01921		1.0176	1.04104	1.04823	1.00262	1.0236	1.03962	1.0588		0.989139	0.998977	1.02073	0.999387	1.01639	1.03365	1.00641	0.991755	1.00164	0.995823			0.997049	1.02655		1.00765	0.977644	1.0239	1.02998	1.00371	1.0042	1.00204	1.01442	1.01396	1.02196	0.995225	1.01771		1.00788	1.00569		1.01409	1.00708	1.00596	1.02465	1.05841	0.980181	0.974476
18.833	1.03508	1.01546		1.00095	1.03089	1.04201	1.00936	1.0162	1.04249	1.06585		0.992213	0.99746	1.00637	1.00682	1.01489	1.0263	1.00361	1.00622	1.00857	0.980582		1.01454	0.979958	1.02671		1.00256	0.980731	1.0331	1.00534		1.01999	1.01149	1.0153	1.01435	1.00344	0.993859	1.01094		1.00636	1.00754		1.00516		1.01243	1.02963	1.04267	0.971271	0.990307
18.867	1.03884	1.00313		0.993683	1.04015	1.05555	1.00744	1.01792	1.02785	1.04863		0.996735	1.00264	0.992568	1.00911	1.00936	1.01912	1.03023	1.00581	1.01406	0.964992			0.996662	1.0271		1.00112	0.962584	1.02009	1.02598	1.00289	1.0147	0.993734	1.01052	1.0166	0.988736	0.997557	1.01413		1.00517	0.998609		1.02729	1.0223	1.01713	1.02488	1.04169	0.991185	0.997938
18.9	1.03131	1.00422		1.00759	1.02848	1.05451	1.00664	1.01485	1.04073	1.0599		1.00808	1.00168	0.998517	1.00721	0.999485	1.0234	1.03344	1.00104	1.01221	0.976263		1.00189	0.993476	1.01798		1.01849	0.972749	1.02749	1.02692	1.00627	1.01025	0.998188	1.00449	1.03082	0.997575	0.995225	1.01242		1.00325	1.00477		1.02656	1.0214	1.00482	1.02029	1.05662	0.983073	0.988358
18.933	1.03994	1.00661		1.00927	1.0406	1.04373	1.01251	1.01422	1.02428	1.05834		1.00928	1.00383	1.00693	1.01637	1.01221	1.01581	1.03303	0.994884	1.00857	0.973805		1.01043	0.993476	1.01609		0.994591	0.978019	1.0239		0.993339	1.01369	0.999493	1.00059	1.01978	0.978343	0.988794	1.02013		1.00437	1.01032		1.02639	1.02268	1.00344	1.00636	1.03794	0.981944	0.995821
18.967	1.03306	1.00907		1.01654	1.04562	1.04605	1.00244	1.01377	1.02904	1.05303		0.994262	1.00613	0.99947	1.01012	1.01718	1.01702	1.02026	1.01829	1.00283	0.993992		0.993744	0.999302	1.02671		1.0001	0.972219	1.02173	1.03069	0.990951	1.00538	0.993035	0.990802	1.01847	0.994369	0.996923	1.00564		0.994143	1.01756		1.02993	1.01432	1.00442	1.00731	1.0474	0.982508	0.992493
19	1.02994	0.99957		1.01636	1.04391	1.04062	1.01968	1.01549	1.03478	1.06585		0.997584	1.01035	0.996774	1.02482	1.03409	1.0242	1.03098	1.01952	1.00672	0.978227		0.996413	0.978864	1.0142		0.99417	0.974402	1.02808	1.02614	1.00743	1.0074	0.999335	1.00912	1.02522	1.00836	0.995225	1.022		1.00397	1.00923		1.04022	1.01288	1.00928	1.01514	1.03835	0.987562	0.992661
19.033	1.03747	1.01081		1.00396	1.04041	1.04459	1.00936	1.00899	1.03429	1.05899		1.005	1.00709	1.00289	1.00348	1.01008	1.02243	1.03732	1.02075	1.00959	0.960919		0.994311	0.980731	1.02749		1.0068	0.979142	1.01365	1.02653	1.00347	1.02319	1.0001	1.01125	1.02313	1.00133	0.999089	1.01016		1.01013	1.00792		1.03403	1.01379	0.999887	1.00406	1.06787	0.977454	0.984292
19.067	1.03371	1.01035		1.00546	1.04409	1.05623	1.01251	1.01522	1.02568	1.05038		0.985642	1.01632	1.00844	1.02197	1.0036	1.02243	1.05323	1.02296	0.996326	0.976016		1.00496	0.977384	1.01648		1.00459	0.982385	1.02486	1.02865	1.0047	1.01974		1.01214	1.01094	0.979831	1.00126	1.00658		1.01093	1.00346		1.04682	1.01123	1.00046	1.00882	1.04227	0.982109	0.985434
19.1	1.04546	1.00926		1.00377	1.04104	1.0488	1.01505	1.00891	1.01924	1.04351		0.976173	1.0094	1.0205	1.01912	1.00282	1.03195	1.01623	1.02813	1.01196	0.968715		1.0085	0.969465	1.02961		1.00273	0.973717	1.02808	1.02465	1.01285	1.02419	0.997331	1.00272	1.02647	0.99453	1.01542	1.01032		0.997022	1.00662		1.03773	1.00324	1.019	1.00082	1.03696	0.976256	0.978946
19.133	1.03637	1.01364		1.00528	1.05621	1.05216	1.0195	1.00828	1.01944	1.05432		0.999457	1.01362	1.00844	1.01493	0.998795	1.01775	1.00709	1.03273	0.99937	1.0027		1.02308	0.980184	1.01726		1.00866	0.970101	1.00751	1.02842	1.02858	1.00799	1.00086	1.03326	1.01412	0.996797	1.00552	1.01858		0.986629	1.00068		1.03306	1.00272	1.00337	1.00944	1.06845	0.979713	0.987787
19.167	1.03922	0.998019		0.999518	1.04625	1.05734	1.01041	1.00828	1.02014	1.04241		1.00935	1.02341	1.00709	1.00521	0.991369		1.01251	1.02558	0.98324	1.00312		1.02856	0.994956	1.02427		0.999854	0.974686	1.00804	1.03053	1.022	1.01748	0.994564	1.01052	1.01451	0.996636	1.01735	1.00074		0.997817	1.02087		1.04489	1.00452	1.02192	1.01783	1.04936	0.981875	0.98503
19.2	1.02884	1.00971		1.02901	1.03889	1.0563	1.01802	1.00458	1.04163	1.04635		1.00073	1.01458	1.00519	1.00181	0.994445	1.02824	1.00988	1.03848	0.991182			1.00172	0.998369	1.01993		1.00028	0.946464	1.00519	1.02653	1.02899	1.01933	0.986418	1.00324	1.01171	1.00719	1.02025	1.01593		1.00437	1.00362		1.02896	1.00671	1.00005	0.995672	1.04129	0.980843	0.977971
19.233	1.03876	1.0172		1.02538	1.05316	1.05751	1.00113	1.01369	1.0354	1.0415		0.998257	1.01649	1.00193	1.00963	1.00472		1.02801	1.03749	0.992442	1.00846		1.00212	0.985623	1.01175		1.0035	0.932992	0.99689	1.0237	1.0411	1.02948	1.00086	1.01722	1.01638	1.00774	1.01075	1.01274		1.00454	0.998609			1.01123	1.02038	0.99092	1.04504	0.96831	0.975047
19.267	1.03481	0.997376		1.00722	1.04194	1.04941	1.00428	1.00764	1.04569	1.05011		1.01122	1.02628	1.01265	0.99494	0.999025	1.02848	1.02043	1.03651	0.985935	1.01559		1.00639	0.98881	1.00152		0.999011	0.939166	1.00721	1.01821	1.03953	1.01755		1.00229	1.00325	0.987798	1.01808	1.01516		0.993183	0.992452		1.02349	0.999782	1.0139	0.998591	1.04797	0.972731	0.979753
19.3	1.03591	0.997376		1.00678	1.05989	1.05191	1.00954	1.03028	1.03777	1.04461		1.00508	1.00828	1.01915	0.989802	0.996735	1.01992	1.03354	1.02204	0.989225	1.00414		1.02622	0.988423	1.00986		1.00596	0.929686	0.997262	0.993019	1.04011	1.0283	1.0014	0.978671	1.00962	0.988509	1.02258	1.01835		0.984079	1.01462		1.03049	1.00814	1.01025	1.01521	1.04936	0.986461	0.970578
19.333	1.0248	0.99783		1.02175	1.06116	1.05691	1.00428	1.01459	1.03084	1.04745		1.01002	0.999441	1.00614	0.995563	1.00969	1.01524	1.03156	1.02262	0.994543	1.01152		1.02332	0.99029	1.02411		1.00452	0.938043	1.00609	0.999455	1.03797	1.02527	0.991255	1.01811	1.00589	1.00156	1.01115	1.0178		0.997584	1.00138		1.01336	1.01432	1.01276	1.03887	1.02416	0.977152	0.995821
19.367	1.02857	0.990793		1.00722	1.04885	1.06234	1.00218		1.05996	1.05716		1.0067	1.02134	1.00979	1.01081	0.999418	1.02694	1.04227	1.02977	0.986601	1.01152		1.02292	0.995503	1.01576		1.00063	0.942938	1.00826	1.02237	1.02841	1.03745	0.99886	1.01561	1.00698	0.988736	1.01365	1.01267		1.00702	0.999917		1.01626	1.02199	1.00693	1.01616	1.04936	0.972332	0.980157
19.4	1.02811	0.990338		1.01192	1.05101	1.05148	1.00262	1.02894	1.03728	1.05671		1.01762	1.03018	1.01518	1.00015	1.00131	1.01314	1.03592	1.01507	0.992514	1.01559		1.00212	1.00149	1.01954		1.00673	0.943842	1.01492	1.02409	1.03558	1.02813	0.984573	0.999639	1.01335	0.990225	1.01325			0.993512	1.00422		1.01529	1.01981	1.00968	1.02511	1.03933	0.955076	1.01522
19.433	1.01948	0.992987		1.00058	1.0493	1.03802	1.00428	1.00917	1.04372	1.03372		0.997481	1.02421	1.01288	1.00417	1.00684	1.01468	1.03452	1.0214	0.990906	1.00109		1.01494	1.00577			1.01961	0.964018	1.0034	1.01915	1.02643	1.02754	0.985878	0.990739	1.01801	0.984981	1.01518	1.02155		1.00351	0.991976		1.02109	1.02109	1.00207	1.03065	1.04406	0.967374	1.01653
19.467	1.0339	0.979555		1.01724	1.06179	1.0538	1.00744		1.06263	1.047		1.00055	1.02882		1.01405	1.00779	1.01895	1.02893	1.01309	0.981109	0.996347		1.01824	1.00841	1.02544		1.00241	0.971251	1.00863	1.02598	1.03418	1.02795	1.00761	1.00037	1.00621	0.992653	1.01945	1.00745		1.0091	0.986585		1.0079	1.03616	1.02652	1.00905	1.04504	0.989947	1.01027
19.5	1.02591	0.994993		1.00315	1.05208	1.04345	1.01338	1.01242	1.05401	1.04077		1.00031	1.02787	1.02422	1.01003	0.998076	1.01394	1.02654	0.99921	1.00189	1.00804		1.01704	1.00483	1.01097		1.01691	0.962364	1.01985	1.02426	1.02084	1.02695	1.00354	0.993239	0.995727	0.984753	1.02275	1.00558		0.999902	0.998451		1.01449	1.03073	1.01203		1.04601	0.980238	1.00264
19.533	1.03766	0.993442		1.0051	1.05945	1.05277	1.01128	1.0274	1.03896	1.05185		1.00917	1.02882	1.02136	1.02701	0.992385	1.00595	1.02135	1.01309	0.986007	0.998805		1.00326	1.00142	1.01491		1.01487	0.944746	1.00631	1.02653	1.01309	1.03828	1.00968	1.00656	1.01576	0.991714	1.02154	1.01874		0.999504	0.995676		1.00226	1.02583	1.00287	1.0373	1.06314	0.981105	0.987286
19.567	1.03298	0.992345		1.00465	1.06331	1.0532	1.01146	1.02722	1.0452	1.03417		1.00133	1.01998	1.0254	1.0188	0.996342	1.01628	1.01039	1.01129	0.984152	1.01475		0.991408	0.992797	1.02309		1.01122	0.955286	1.01408	1.02653	1.02974	1.02938	1.00169	1.00531	0.998365	0.987959	1.01108	1.01593		1.00397	0.975579		1.0009	1.01913	1.01615	1.01917	1.0527	0.958533	0.997672
19.6	1.04207	0.991247		0.998895	1.04993	1.05905	1.02809	1.01549	1.04401	1.03702		1.0079	1.02516	1.03707	1.01975	1.00249	1.02427	1.01657	1.00891	0.977051	1.01271		1.0085	0.985651	1.02058		1.01021	0.951075	1.01789		1.02851	1.03627	1.02075	1.00957	1.00194	0.989447	1.01438	1.0178		1.00205	0.993602		1.00966	1.0293	1.00579	1.02986	1.05213	0.972098	0.973975
19.633	1.02922	0.989696		1.0081	1.03171		1.02809	1.01287	1.03658	1.05094		1.01242	1.03862	1.03016	1.01935	0.97809	1.01144	1.01179	1.01228	0.984398	1.00881		0.990606	0.991637	1.02286		1.00487	0.940006	1.00795	1.02331	1.03032	1.03484	1.01576	0.996256	1.00435	0.988348	0.998455	1.02045		0.998942	0.998609		1.01723	1.01438	1.01478	1.01363	1.04838	0.978281	0.97048
19.667	1.05006	0.99015		1.00554	1.04275	1.07812	1.02178		1.05094	1.02841		1.00355		1.04088	1.00338	0.975014	1.0099		1.0103	0.969108	1.00474		0.999786	0.982851	1.02498		1.00403	0.955971	1.01715	1.01571	1.03025	1.03324	1.01907	0.993239		0.980837	0.988159	1.01555		0.988782	0.998993		1.02446	1.0146	1.02846	1.02622	1.04977	0.953878	0.978277
19.7	1.02986	1.00048		1.00403	1.03126	1.03509	1.00508	1.01683	1.03638	1.03967		0.999881	1.03304	1.03516	1.0116	1.00416	1.01652	1.02606	1.02435	0.970543	1.01517		0.993343	0.987904	1.02192		0.997078	0.95198	1.01229	1.01665	1.01954	1.02166	1.02199	1.00354	1.01801	1.01344	0.987759	1.03151		0.989344	1.00716		1.02953	1.01604	1.03081		1.03304	0.963022	0.966108
19.733	1.04032	0.99015		1.00297	1.03216	1.05605	1.0161	1.00357	1.04569	1.03501		1.01225	1.03169	1.02484	1.00852	1.00472	1.01668	1.02647	1.00595	0.979326	1.00534		0.974084	0.975545	1.02726		1.00648	0.955816	1.01176	1.0314	1.0295	1.01863	1.02123	1.01332	1.01795	0.993108	0.989125	1.02155		0.992621	1.00754		1.04136	1.01747	1.02514	1.03215	1.05034	0.970569	0.972763
19.767	1.03831	0.985307		1.00297	1.04123	1.04873	0.990551	1.00899	1.0445	1.03436		1.0038	1.03018	1.02333	0.998803	1.01783	1.02798	1.02309	1.02435	0.974847	0.999823		1.00422	0.983238	1.02215		0.983952	0.968319	1.00743	1.0314	1.02118	1.03644	1.02568	1.01781	0.997912	1.0114	0.985827	1.01064		0.988219	1.0003		1.03202	1.01988	1.03195	1.02012	1.04838	0.975788	0.985267
19.8	1.02454	1.00294		1.00484	1.03647	1.04605	0.991166	1.00357	1.03232	1.02108		1.00091	1.02556	1.02064	1.02243	1.00717	1.02193	1.03323	1.02337	0.984993	1.00618		0.995279	1.00274	1.0142		0.981495		1.01303	1.01398	1.02793	1.01578	1.02753	1.00787	1.01103	1.00897	0.985192	1.01306		0.993251	1.00161		1.02913	1.01791	1.03292	1.00619	1.05115	0.97426	0.966679
19.833	1.02343	0.996999		1.00572	1.04904	1.06512	1.00044	1.02774	1.02608	1.02639		1.01097	1.02787	1.01088	1.03365	1.00298	1.02604	1.03882	1.01326	0.98076	0.999402		1.00463	1.00554	1.0068		1.00743	0.962675	1.00854	1.02536	1.0323	1.02569	1.02123	1.00647	1.0174	1.015	0.990823	1.0249		0.997488	1.01201		1.02663	1.0259	1.02135	1.00619	1.0421	0.970569	0.963922
19.867	1.02986	0.998551		1.01342	1.04123	1.03355	0.970873	1.00167	1.04064	1.03592			1.01712	1.01508	1.02884	1.01633	1.02838	1.04162	1.00949	0.985239			0.99568	0.99093	1.01664		1.00946	0.973744	1.00764	1.02364	1.02595	1.03157	1.02323	1.00927	0.997592	1.0218	0.985026	1.01532		0.994609	0.993985		1.0078	1.02537	1.00831	1.01078	1.05588	0.980044	0.961973
19.9	1.02324	1.02084		1.01298	1.0406	1.04769	0.987144	1.00817	1.03371	1.03675		1.00253	1.01847	1.01873	1.03097	1.00298	1.02838	1.045	1.01721	0.976036	1.0072		1.00132	0.987744	1.02427		1.00904	0.972465	1.00188	1.01437	1.02735	1.02997	1.01639	0.994917	1.00769	1.02445	1.00562	1.02942		0.997488	0.997684		1.02993	1.01866	1.00653	1.0274	1.06216	0.966878	0.970578
19.933	1.02655	1.01089		1.0066	1.03387	1.0508	1.00106	0.995801	1.05114	1.03922		1.01525		1.01397	1.02371	1.01767	1.03677	1.04838	1.0103	0.982369	1.0027		0.976988	0.989064	1.02655		1.00006	0.96726	1.0134	1.0172	1.02851	1.02594	1.02323	1.01515	1.00824	1.00991	1.00095	1.02303		0.999805	1.01086		1.02389	1.02484	1.01082	1.03635	1.0474	0.982936	0.960427
19.967	1.0226	1.01947		1.01537	1.04554		0.993267	0.995801	1.05233	1.03546		1.01942	1.0152	1.02198	1.01549	1.0093	1.03129	1.04541	1.0085	0.968268	0.999227		0.997449	0.995823	1.03166		1.00132	0.971625	1.01542	1.01343	1.0178	1.02778	1.02269	1.02457	1.01592	1.00124	0.988891	1.01851		0.996528	0.993218		1.02156	1.039	0.990497		1.04544	0.984465	0.948091
20	1.02591	1.01921		1.02821	1.02911	1.04209	1.01418	0.991654	1.05045	1.02768		1.00815	1.0125	1.01834	1.03058	1.00439	1.03322	1.03445	0.998393	1.00249	1.00025		1.01407	1.0011	1.02577		0.999041	0.975991	1.01721	1.01532	1.03312	1.03022	1.01808	1.02862	1.00187	1.02118	0.993721	1.02077		0.992621	1.00346		1.02446	1.02867	1.02215	1.03943	1.0474	0.987756	0.958241
20.033	1.02389	1.00706		1.01368	1.03818	1.04416	1.01356	0.991019	1.02608	1.04032		1.00568	1.01576	1.01469	1.0384	0.992778	1.03266	1.03248	0.998393	0.973587	1.00414		0.999551	0.985331	1.03851		1.01013	0.977644	1.00585	0.995618	1.01088	1.0371	1.01992	1.0089	1.00901	1.01555	0.9646	1.00855		0.996858	1.00161		1.02196	1.04683	1.00968	1.02337	1.05311	0.984864	0.962948
20.067	1.03032	0.999116		1.01368	1.03729	1.03605	1.01207	0.987769	1.055	1.04627		1.01165	1.01751	1.02192	1.02181		1.0367	1.03388	1.0103	0.979572	1.00126		1.00092	0.99209	1.01136			0.976211	0.987073	1.0278	1.01582	1.03794	1.02692	1.03091	1.01313	1.0035	0.967899	1.00667		0.990536	0.997526		1.02679	1.03719	1.00579	1.01537	1.05449	0.989918	0.958241
20.1	1.01902	0.998019		1.01757		1.04209	1.01523	1.00428	1.04372	1.04491		1.01225	1.0277	1.01787	1.03365	0.982114	1.03436	1.03807	1.01129	0.983282	1.00474		1.00229	0.999782	1.02104		1.01276	0.981106	0.991782	1.01831	1.0206	1.03954	1.01916	1.02929	1.01653	1.01124	0.975062	1.00667		0.995171	0.982502		1.03009	1.01791	1.01089	1.00216	1.05115	1.00003	0.970745
20.133	1.03344	1.00441		1.02714	1.03773	1.03545	0.995984	0.992551	1.04253	1.04271		0.995783	1.00772	1.03342	1.02299	0.993171	1.0225	1.04384	1.01844	0.982862	0.988552		1.0093	0.989837	1.02765			0.961835	1.0069	1.01587	1.01343	1.04827	1.02415	1.03444	1.01142	1.01046	0.969997	1.00083		1.00381	0.97357		1.01536	1.02424	1.00482	1.02527	1.04838	1.01552	0.958812
20.167	1.02279	1.00093		1.01438	1.0336	1.03234	0.995729	0.991917	1.04708	1.04646		1.012	1.02579	1.02057	1.03611	1.01892	1.02564	1.02736	1.02517	1.00077	1.00042		1.00656	0.984397	1.01058		1.02098	0.981636	0.987445	1.02097	1.01343	1.04785	1.0273	1.01296	1.0184	1.00968	0.982225	1.01058		1.00421	0.984735		1.02663	1.02477	1.00676	1.01839	1.04781	0.983404	0.969199
20.2	1.02214	0.993442		1.01863	1.02624	1.06848	0.985403	1.00365	1.04015	1.05132		1.00175	1.01448		1.02678	1.01054	1.03459	1.03551	1.02419	0.997485	1.00534		1.00793	0.998849	1.01814		1.01343	0.960401	1.00997	1.02058	1.01006	1.04541	1.02177	1.01671	1.01933	1.00703	0.97756	1.001		1.00788	0.976186		1.02526	1.04299	1.00562		1.0421	0.979148	0.976426
20.233	1.01571	1.01747		1.00279	1.03253		0.96562	1.00212	1.04659	1.04582		1.0073	1.01719	1.03151	1.02907	1.01473	1.02878	1.02818	0.99921	0.992166	1.00144		0.98303	1.00181	1.01475		1.01894	0.982165	1.00802	1.01869	0.997126	1.03912	1.02345	1.00942	1.02274	1.00875	0.983191	1.01135		1.00229	0.97102		1.01383	1.05226	1.00036	1.01268	1.04977	0.994807	0.982106
20.267	1.02279	1.00952		1.0081	1.031	1.04244	0.966745	0.991468	1.02362	1.04381		1.02112	1.02523	1.02977	1.04125	1.00217	1.02604	1.01565	1.02755	0.994021	1.00814		1.02816	0.999556	1.00641		1.01708	0.96199	0.98887	1.0041	1.01278	1.04214	1.00955	1.02783	1.02274	1.01195	0.97756	1.0108		1.00308	0.98936		1.0214	1.04842	1.00837	1.01744	1.04504	0.978749	0.98251
20.3	1.02123	0.997188		1.00704	1.0284	1.04148	0.963593	0.991468	1.03798	1.05819		1.00893	1.01471	1.01508	1.02678	0.999322	1.03459	1.02637	1.03487	0.991818	1.01509		1.01978	1.00896	1.01381		1.00581	0.970876	1.003	1.00638	1.015	1.03467	1.00955	1.01597	1.02461	1.0025	0.988022	1.00761		1.01731	0.988435		1.01576	1.04917	1.00019	1.01324	1.04879		0.984292
20.333	1.02766	1.00358		1.00572	1.03082	1.03502	0.961237	0.989936	1.03461	1.06323		1.01062	1.01583	1.0277	1.03689	1.01133	1.03192	1.01442	1.0398	1.00204	1.00263		1.01978	0.995823	1.02459		1.02175	0.959432	1.00786	0.991781	1.01064	1.03425	1.01585	1.01686	1.02406	0.997803	0.993087	0.995771		1.00795	0.992135		1.0119	1.05625	1.00821		1.0425	0.983569	0.989569
20.367	1.02564	0.999194		1.00377	1.03342	1.02113	0.999646	0.979923	1.02838	1.04206		1.01659	1.01138	1.02215	1.03421	1.00413	1.02918	1.03272	1.02731	0.986992	0.994835		1.01277	1.00406	1.02042		1.02319	0.966356	1.01833	1.01258		1.03686	1.00194	1.00927	1.02088	1.00305	0.997351	1.01213		1.00772	0.998834		1.01133	1.05007	1.01096	1.01839	1.04544		0.984056
20.4	1.02123	1.00998		0.999078	1.04231	1.03613	0.995008	0.96666	1.0365	1.05269		1.00695	1.0062	1.02254	1.02734	0.998604	1.03192	1.03889	1.04933	0.979644	1.00772		1.02268	1.00274	1.00357		1.02048	0.954318	1.02267	1.00709	1.00446	1.02611	1.00863	1.01281	0.994701	1.00515	1.00242	1.01064		1.02043	1.00531		1.01656	1.06242	1.00351		1.04821	0.981076
20.433	1.02077	1.00998		0.995886	1.04275	1.03716	0.986963	0.97641	1.03818	1.04912		1.01334	0.992747	1.02445	1.02181	1.00753	1.03112	1.04787	1.03405	0.980484	1.00137		1.02889	1.00384	1.01152		0.98981	0.952664	1.0214		1.00907	1.02754	1.00509	1.01951	1.00876	0.993431	0.995819	1.00971		1.01195	1.00438		1.02106	1.06062	1.0061	1.01095	1.04642
20.467	1.03363	1.00623		1.00403	1.03952	1.04752	0.983376	0.996885	1.03006	1.05773		1.01147	0.99522	1.0277	1.01762	1.01251	1.02861	1.02562	1.03126	0.990876	0.989498		1.02131	1.00422	1.01097		1.02497	0.959213	1.00876	1.01125	1.01145	1.02166		1.00738	1.00409	1.00211	0.98729	1.01119		1.01715	1.004		1.01487	1.04751	1.00489		1.04112	0.977785
20.5	1.03382	0.999194		1.00165	1.04751	1.0313	0.972434	0.97559	1.03769	1.05993		1.00533	0.997692	1.02501	1.00656	1.00848	1.02668	1.02224	1.03422	0.983354	0.995185		1.01624	1.00532	1.0197		1.01659	0.957934	1.00479	1.02074	1.00668	1.03644	1.01025	1.00805	1.02747	1	0.985358	1.00761		1.01116	1.00754		1.01777	1.0555	1.00173	1.02068	1.04879	0.97722
20.533	1.03051	0.999648		1.00315	1.04688	1.03216	0.957575	0.991019	1.01571	1.05534		1.01232	1.00597	1.02501	1.01801	1.01345	1.0345	1.02999	1.03283	0.988252	0.971028		1.01994	1.00197	1.0083			0.963734	1.00981	1.03322	1.00354	1.02754	0.999941	1.01887	1.02467	1.00564	0.982459	1.00425		1.01731	1.01424		1.00263	1.05859	1.00505	1.01822	1.04642	0.965983
20.567	1.04135	1.00604		1.00227	1.04625	1.04216	0.955654	0.979289	1.04007	1.05534		0.995856	1.01408	1.02882	1.02141	1.02255	1.01715	1.02166	1.02847	0.991122	0.964323		0.992708	1.02334	1.01876		1.02929	0.94702	0.994105	1.02624	1.01862	1.03317	1.00923	1.00238	1.02902	1.00149	1.00538	0.999352		1.0102	0.995676		0.99797	1.0604	1.00918	1.01839	1.05034	0.982839
20.6	1.0283	1.01755		0.998637	1.05469	1.04191	0.962573	0.982539	1.03383	1.05599		0.996281	1.01138	1.01834	1.02924	1.0197	1.03781	1.03081	1.02173	1.00211	0.993148		1.00439	1.02373	1.01231		1.04607	0.959368	1.00585	1.00426	1.01524		1.00016	0.998907	1.00712	1.00923	0.982859	1.00051		1.00748	0.998834	0.968407	1.0065	1.05678	1.00368	1.02202	1.03875	0.975692
20.633	1.02343	1.00786		0.993759	1.04472	1.03173	0.954964	0.990571	1.03432	1.05288		1.00575	1.01791	1.03556	1.03437	1.01038	1.02902	1.01927	1.02946	0.987238	0.990094		1.00205	1.00142	1.0068		1.04217	0.958309	0.999558	1.02851	1.01088	1.02729	1.01369	0.998755	1.0232	1.00845	0.980527	1.00619		1.01195	1.00608	0.982905	0.998536	1.04533	1.01381	1.01632	1.04389	0.968544
20.667	1.03271	1.02375		1.00528	1.05532	1.0438	0.958371	0.987135	1.03531	1.03611		1.00677	1.01352	1.02215	1.04125	1.01607	1.02708	1.03081	1.00761	0.986223	1.00628		1.01003	1.0151	1.01058		1.03828	0.955751	0.995221	1.01564	1.0061		1.00923	1.00052	1.01535	1.01878	0.99742	1.009		1.00828	0.994368	0.980894	1.009	1.04118	1.0181		1.05213	0.95867
20.7	1.02739	1.0253		0.977727	1.05792	1.05001	0.955038	0.990571	1.02333	1.04316		1.00925	1.00103	1.02024	1.02789	1.01473	1.02902	1.01292	1.01952	0.991122	1.00382		1.01197	1.00554	1.02876		1.04607	0.957405	1.0232	1.00238	1.00429	1.03032	1.01814	1.00104	1.01963	1.03348	1.00442	1.01071		1.0106	0.996984	0.9876	0.997169	1.0399	1.01421	1.03389	1.04112	0.961961
20.733	1.02986	1.02084		0.977104	1.059	1.05855	0.958626	0.981006	1.03769	1.04051		1.01147	1.00198	1.01239	1.05097	1.01355		1.02207	1.01894	0.98031	1.00526		1.01003	1.01533	1.01263		1.08225	0.949952	1.01145	1.01375	1.01104		1.00608	1.00884	1.01963	1.02581	0.997489	1.01429		1.02307	1.00014	0.978341	0.988238	1.04465	1.0066	1.03025	1.05743	0.959234
20.767	1.0148	1.0001		0.982863	1.05513	1.04984	0.955293	0.994718	1.03769	1.04646		1.00652	1.01026	1.01469	1.03248	0.999092	1.02006	1.02569	1.00605	1.00498	0.998733		1.0139	1.01043	1.02026		1.04743	0.945431	0.995221	1.02702	0.995148	1.02242	1.01776	1.00281	1.01178	1.01243	1.00722	1.00642		1.01228	0.9996	0.978724	1.009	1.04193	1.00522	1.02091	1.05156	0.985566
20.8	1.02298	1.00979		0.987194	1.0484	1.05173	0.961597	0.993821	1.02908	1.03895		0.999954	1.00277	1.01429	1.02789	1.00707	1.03967	1.02091	1.0118	0.989093	0.996275		1.02164	1.00747	1.01019		1.06582	0.948144	1.01505	1.02702	1.00767	1.02402	1.00624	1.00811	1.02133	1.03966	1.01615	1.00829		1.01284	1.00869	0.976872	1.00047	1.03139	0.991941	1.01387	1.03916	0.960598
20.833	1.01701	0.993786		0.993834	1.05361	1.0432	0.952757	0.985603	1.03076	1.04536		1.00533	1.00795	1.01587	1.04354	1.00478	1.0249	1.03838	1.01057	0.996615	0.988058		1.0368	0.999396	1.01537		1.06989	0.950326	1.02446	1.01603	0.997946	1.02503	1.00255	1.00759	1.01348	1.04841	1.01848	1.01132		1.01341	1.0137	0.972785	1.00007	1.03139	0.994692	1.00944	1.04879	0.973364
20.867	1.0183	0.99352		0.987634	1.05748	1.05062	0.951016	0.999686	1.0267	1.05177		1.00865	1.01313	1.01492	1.02449	1.00534		1.02866	1.0215	0.994165	1.00586		1.00803	1.00841	1.0186		1.07295	0.948144	1.01204	1.01603	0.995967	1.02747	1.00646	1.01399	1.02126	1.02322	1.01325	1.0029		1.00877	1.00298	0.971317	1.00707	1.02612	1.00854	1.00374	1.05058	0.966217
20.9	1.01499	1.01096		0.997026	1.05145	1.03984	0.956959	0.98209	1.02551	1.04536		1.02154	1.0191	1.01222	1.03365	1.01829	1.03089	1.0505	1.0201	0.99476	1.0034		1.00335	0.98929	1.03189		1.04329	0.949422	1.01743	1.02152	0.987814	1.02503	1.01108	1.02039	1.00728	0.997803	0.989925	0.996518		1.00957	1.00391	0.98805	1.03289	1.02686	1.00603		1.04683	0.972565
20.933	1.03115	1.00347		0.99233	1.05774	1.04191	0.945762	0.974058	1.02432	1.04005		1.03186	1.01583	1.01587	1.00656	1.01371	1.01605	1.03657	1.0187	1.00389	0.994166		0.985062	0.997529	1.0245		1.02592	0.964483	1.01257	1.0238	1.00231	1.02402	1.01646	1.01311	1.00425	1.01179	1.00505	0.998001		1.00702	1.00021	1.00331	1.00963	1.02053	1.0019	1.01862	1.04389	0.965817
20.967	1.01921	1.02595		0.997466	1.05335	1.01923	0.95819	0.988404	1.02215	1.04426		1.01582	1.0124	1.01706	1.01935	1.00076	1.02316	1.04152	1.02626	1.00634	0.992727		0.98079	1.00281	1.02639		1.06235	0.958154	1.00696		1.00207	1.02117	1.01461	1.01774	1.00766	1.00522	1.00369	1.01077		1.00526	0.99705	0.984888	1.01333	1.01782	1.00133	1.01347	1.04781	0.985965
21	1.0059	1.00987		0.996585	1.04238	1.02527	0.948659	1.00473	1.02957	1.03254		1.04133	1.00835	0.997536	1.00545	1.00684	1.03496	1.02917	1.0219	1.00753	1.01358		0.99304	0.982917	1.0215		1.00286	0.967415	0.999186	1.01603	1.00586	1.02906	1.01054	0.99464	1.01062	0.997319	0.989125	1.00703		1.00023	0.99705	0.989518	1.018	1.01835	1.00214	1.01442	1.04821	0.970307
21.033	1.02077	1.01032		0.997026	1.05837	1.03752	0.967827	1.01303	1.03412	1.033		1.02529	1.01042	1.01863	1.00031	0.999187	1.00719	1.02142	1.01894	1.00144	1.00459		0.98079	0.993796	1.02378		1.01388	0.95198	1.00188	1.02302	0.999924	1.0226	1.00538	0.985589	1.01155	1.00373	1.01358	1.00836		1.00718	0.997591	0.988208	1.01977	1.01654	1.00975	1.01767	1.04723	0.976656
21.067	1.02187	1.02311		0.986571	1.0616	1.02898	0.961268	1.01004	1.03026	1.02924		1.01974	1.01082	1.0138	1.00797	0.994215	1.03042	1.03435	1.01459	0.993079	1.00298		0.984662	1.0088	1.03362		1.08734	0.957094	1.0033	1.00881	1.00009	1.02016	1.02298	1.01289	1.02577	0.998258	1.00892	1.00158		1.00063	0.994817	0.994148	1.0163	1.01217	1.01599	1.01885	1.05351	0.979713
21.1	1.02252	1.00631		0.97949	1.05038	1.02209	0.96442	1.00201	1.02551	1.03849		0.991334	0.999509	1.00427	1.00165	0.998795	1.01321	1.04309	1.02272	0.998151	0.999926		1.00239	0.98781	1.03134		1.0892	0.963424	0.999867	0.991391	0.996717	1.00983	1.02683	1.01201	1.02181	1.00185	1.01455	0.986711		1.00175	1.00668	0.992838	1.0163	1.0093	1.00311	1.02288	1.04683	0.965749
21.133	1.01324	1.00941		0.97949	1.0519	1.0302	0.967752	1.01265	1.0169	1.03474		1.01624	0.998948	1.00276	1.00908	1.0003	1.02023	1.04012	1.0265	1.00406	1.01264		1.00375	1.00133	1.01977		1.10166	0.948893	1.01557	1.02246	1.00446	1.02033	1.00777	1.01488	1.01792	0.99748	1.01318	1.00135		1.00311	0.998516	0.987058	1.01067	0.997481	0.994692	1.02288	1.05392	0.976188
21.167	1.0159	0.999272		0.980811	1.05019	1.01959	0.973006	0.998494	1.02096	1.03895		0.999603	0.987242	1.02728	1.00165	1.00187	1.01829	1.03493		0.998397	1.00407		0.999081	1.00133	1.02756		1.08386	0.952509	1.00674	1.01642	1.00603	1.01001	1.00946	1.01311	1.02615	0.989192	1.00738	0.998937		0.994637	1.0063	0.998394	1.00657	0.999509	0.980037	1.01393	1.05156	0.974425
21.2	1.01324	0.999272		0.988075	1.05343	1.01734	0.983512	1.00526	1.03006	1.02503		1.00395	1.00531	1.01657	1.00505	1.00331	1.02781	1.0262	1.02296	0.991644	1.00203		0.99304	0.987877	1.02189		1.05989	0.954318	1.00839	1.02474		1.01001	1.01668	1.00083	1.01792	1.00732	1.01318	0.995356		0.979774	1.00014	1.00133	1.00657	1.01224	0.992177	1.01164	1.05196	0.979479
21.233	1.02279	1.00347	0.997101	0.990643	1.04759	1.02252	0.983077	1.00571	1.03125	1.0374		1.01939	0.993607	1.02386	1.01935	1.02163	1.0212	1.05183	1.02912	0.997383	1.00347		1.00706	1.00777	1.0215		0.994404	0.961396	1.00046	1.00959	1.00009	1.01077	1.00946	1.00988	1.01863	1.01319	0.992424	1.0012		0.98848	1.01561	0.985907	1.01164	1.01639	1.01518	1.0099	1.04781	0.992246
21.267	1.02187	1.01316	0.998629	0.987634	1.03718	1.02234	0.996195	1.00201	1.026	1.03318		1.00565	1.00373	1.02823	1.03176	1.01152	1.01224	1.05224	1.0329	0.999412	1.00755		0.999482	1.02557	1.01827		1.13945	0.953413	1.02065	1.01697	1.00685	1.01119	1.01168	0.993908	1.03548	1.00428	1.02774	0.99871		0.971533	1.00652	1.00372	1.01534	1.00643	1.01324	1.00934	1.05351	0.973062
21.3	1.0148	1.00593	0.997734	0.982939	1.05989	1.01631	1.00906	0.998757	1.02936	1.03208		1.0071	0.992979	1.02061	1.01651	1.00354	1.02273	1.0393	1.03749	0.99231	1.02349		0.963868	1.02836	1.01788		1.11597	0.970127	1.0113	1.00238		1.02193	1.0239	1.00421	1.0211	0.993725	1.00675	0.996839		0.988713	0.994116	0.993923	1.01534	1.0142	1.01153	1.01377	1.05017	0.977152
21.333	1.01077	1.00748	0.996205	0.984003	1.04759	1.02252	1.00406	0.993975	1.0253	1.0396		1.01137	0.999112	1.02767	1.01058	0.993429	1.01434	1.03568	1.02994	0.993325	1.01077		0.974016	1.00551	1.01638		1.15546	0.958838	1.00644	1.00293	1.00009	1.01345	1.00961	1.01664	1.02165	0.990909	1.00249	1.00736		0.985834	1.00097	0.996317	1.01903	1.01608	1.00351	1.00571	1.04683	0.991282
21.367	1.01278	1.00832	0.98685	0.98569	1.05343	1.03287	1.00449	0.998757	1.02719	1.03318		1.00829	0.999276	1.01814	1.01572	0.996112	1.01378	1.02579	1.0361	0.990702	1.00035		0.996344	1.00458	1.02		0.99609	0.974803	1.00771	0.991552	1.01657	1.01446	1.00815	1.01966	1.01326	0.994664	1.00095	1.00019		0.998709	1.00914	0.99223	1.0233	1.00968	1.00666	1.00476	1.05075	0.97499
21.4	1.0159	0.994695	0.987297	1.00447	1.04086	1.01648	0.999677	1.00552	1.03798	1.03648		1.01674	1.0152	1.0214	1.01533	1.00946	1.01515	1.01722	1.03906	0.997629	1.00688		0.991906	1.00217	1.02473		0.993038	0.957715	1.00935	1.00348	1.0136	1.01345	1.01184	1.02216	1.01062	1.00085	1.00988	1.00245		0.996392	0.999824	0.998328	1.01517	1.01585	1.00059	1.00571	1.05686	0.9709
21.433	1.00837	1.00703	0.985769	1.00341	1.0484	1.01313	1.00519	0.987475	1.03273	1.02613		1.01222	1.00891	1.01489	1.0113	1.0142	1.01652	1.02654	1.04818	0.999658	1.0034		0.994242		1.02095		0.995916	0.970967	1.02072	1.00914	1.00364	1.01974	1.00631	1.01311	1.00892	1.02031	1.00852	0.991935		1.01046	1.00876	1.01267	1.0233	1.01751	1.01364	1.01393	1.05686	0.978047
21.467	1.00369	1.00684	0.992516	0.992695	1.07138	1.0127	0.999317	0.992705	1.03224	1.02742		1.01239	1.02714	1.00878	1.017	1.02604	1.0241	1.01541	1.04678	1.00354	1.00628		0.998514	1.00272	1.01544		0.999216	0.955532	0.999776	1.01291	1.00364	1.02058	1.01108	1.00811	1.02538	1.00185	1.01511	0.994741		1.00679	1.00614	0.998936	1.01244	1.01533	1.01307	1.00839	1.05449	0.980306
21.5	1.00883	1.01479	0.995125	0.992695	1.04499	1.00709	0.983736	0.996404	1.03421	1.02852		1.01137	1.00254	1.0237	1.01186	1.00953	1.03797	1.02118	1.03528	1.01309	1.01688		0.997146	1.00365	1.0185		1.02133	0.958994	0.988035		0.995078	1.02378	1.00608	1.00811	1.00885	1.00998	1.00562	1.01242		1.01182	1.00614	0.995934	1.02097	1.02369	1.0074	1.01147	1.05784	0.980939
21.533	1.00157	1.00813	0.996205	0.989869	1.05495	1.0208	0.984172	1.00417	1.03203	1.02943		1.00028	1.00851	1.02179	1.01778	1.00835	1.02313	1.02456	1.03626	1.00211	1.00628		0.996745	1.00667	1.03219		1.00353	0.962985	0.989614	1.01785	1.0048	1.03553	1.01715	1.01591	1.0094	1.02733	1.00425	0.991		1.0147	1.00745	0.988685	1.02483	1.01751	1.00717	1.01528	1.05939	0.989216
21.567	1.00791	1.01013	1.00142	0.983669	1.08387	1.02416	0.991962	1.014	1.02629	1.03034		1.00232	0.998716	1.01608	1.01454	1.016	1.02176	1.03272	1.02871	1.01267	1.00688		1.00432	1.01359	1.03392		0.994971	0.958089	0.989986	1.00858	1.00562	1.02722	1.00955	1.01554	0.998138	1.03297	1.01495			1.0147	1.00506	0.998169	1.013	1.03295	1.00894	0.995644	1.04977	0.989616
21.6	0.99799	1.00109	0.99162	0.985356	1.0809	1.02916	0.985222	1.00462	1.0347	1.03493		1.00582	0.999673	1.02942	1.02236	1.00344	1.0237	1.01203	1.03446	1.01267	1.00358		0.996344	1.0059	1.02196		1.00132	0.958464	0.998134	1.01785	0.997875	1.02235	1.017	1.00701	0.997206	1.01616	1.01751	1.01281		1.01142	0.994275		1.01124	1.02459	1.01267	1.00063	1.05213	0.987288
21.633	0.997722	1.00922	0.999447	0.989611	1.06052	1.03873	0.993628	1.00174	1.00767			1.0054	1.00525	1.02258	1.0117	1.01852	1.01321	1.02118	1.0168	1.00837	1.00586		0.99304	1.01678	1.02802		0.990479	0.955596	1.00718	1.01258	1.01377		1.0133	0.987659	1.01724	1.01992	1.01285	0.997066		1.01334	1.00021	0.988301	1.0155	1.03092	1.01558	0.989155	1.04781	0.98576
21.667	1.01012	1.01187	1.00034	0.99493	1.03907	1.03295	0.974821	1.01609	1.02014	1.0319		1.01137	0.991791	1.0283	1.02007	1.01639	1.02621	1.0206	1.01976	1.01344	1.01256		1.00255	1.01903	1.03053		0.991075	0.957779	1.01982	0.996103		1.01362	1.02406	1.00738	1.01779	1.00842	1.01598	1.00532		1.01086	0.994658	0.987918	1.02083	1.02225	1.01599	0.990662	1.05017	0.98536
21.7	1.01103		0.997734	1.00113	1.059	1.02313	0.9812	1.01463	1.02896	1.02787		1.01137	1.00254	1.01663	1.02347	1.01355	1.02484	1.02555	1.02313	0.999238	1.0007		1.01303	1.01359	1.02675		0.992092	0.956501	1.01675	1.01713	1.00924	1.01748	1.02352	1.01363	1.00955	0.999197	1.02901	1.00274		1.00334	0.980559	0.988301	1.03363	1.02369	1.00837	0.986466	1.05368	0.973558
21.733	1.00818	1.00703	1.00098	0.98917	1.0538	1.02666	0.975076	1.01635	1.02371	1.02833		1.00088	0.996012	1.0025	1.0309	1.0126	1.02855	1.01582	1.02231	1.00389	0.995606		0.990468	1.02206	1.03053		0.994724	0.954847	1.00665	0.988725	1.0108	1.02252	1.02629	1.00119	1.00878	1.00467	1.02338	0.992777		1.01006	0.988342	0.98051	1.02123	1.02512	1.01501	1.00079	1.05115	0.981738
21.767	1.01012		1.0053	1.00007	1.06179	1.02045	0.972104	1.00985	1.03925	1.03474		0.995505	1.01273	1.01759	1.01755	1.00953	1.03065	1.01763	1.02173	1.00204	1.00807		1.00505	1.00294	1.02369		0.989389	0.963953	1.02094	1.00787	1.01739	1.02739	1.03221	1.01768	1.01624	1.00655	1.02241	1.00929		0.99583		0.984981	1.01373	1.02294	1.01736	0.991055	1.05368	0.977483
21.8	1.00883	1.01452	1.00511	0.99493	1.06331	1.01959	0.975256	1.00959	1.034	1.02393		1.01402	0.998716	1.02179	0.99677	1.01963	1.01879	1.02159	1.02075	0.997905	1.0107		1.00465	1.01079	1.02691		0.989214	0.95198	1.0148	1.00826	1.01838	1.02697	1.02059	0.999058	1.01174	1.01108	1.01872	1.0089		0.988316	0.996891	0.997852	1.01743	1.02331	1.01914	0.981321	1.05605	0.976285
21.833	1.01701	1.00018	0.996653	0.997057	1.05335	1.02398	0.969568	1.02547	1.02658	1.01816		1.01034	0.993539	1.01798	1.00973	1.01411	1.03025	1.01046	1.02395	0.985905	0.983913		1.00699	1.00729	1.02085		0.985318	0.953258	1.00994	1.01242	1.01104	1.01748	1.02743	1.00384		0.995603	1.02315	1.00065		0.982324	0.985726	0.993764	1.0291	1.02602	1.00821	0.966604	1.0527	0.987688
21.867	1.00773	1.00987	0.99233	0.99148	1.05272	1.02795	0.971924	1.01762	1.04024	1.02457		1.0042	0.983745	1.0256	1.01834	1.00763	1.01451	1.00511	1.0297	1.00179	0.980016		1.01029	1.01195	1.0229		0.971	0.955441	1.01248	1.01564	1.01838	1.02781	1.01713	1.01341	1.01065	1.00748	1.02861	0.99426		0.99199	0.982951	0.99469	1.0163	1.03183	1.01388	0.962965	1.05368	0.982702
21.9	1.0194	0.993786	1.0006	0.99724	1.05424	1.03123	0.979969	1.01654	1.03015	1.03447		0.99388	1.00548	1.01029	1.01644	1.00131	1.00733	1.00808	1.03865	0.995456	0.991287		1.00909	1.00893	1.02707		0.986932	0.943997	1.00275	1.01642	1.01121	1.0179	1.01452	1.00098	1.00055	1.00373	1.02531	0.996358		0.999504	0.98126	0.989836	1.01164	1.01074	1.01776	0.935431	1.0576	0.98985
21.933	1.01545	1.00438	0.997996	0.996799	1.05469	1.03873	0.965004	1.00978	1.01895	1.02036		0.967347	0.998552	1.0168	1.00387	1.00795	1.00499	1.01005	1.03035	0.99892	1.00459		0.989667	1.01009	1.01228		0.980579	0.936919	0.99916	1.01736	1.01599	1.02033	1.01414	1.01408	1.01438	1.01351	1.01872	0.988648		0.999106	0.990958	1.00009	1.00464		1.02206	0.95133	1.05605	0.999159
21.967	1.0272	1.00593	1.00735	0.995735	1.05119	1.01959	0.972614	0.996699	1.034	1.03227		0.983635	1.00795	1.0164	1.02236	1.00014	1.01394	1.00808	1.03371	1.01032	1.00825		1.00499	1.00217	1.01133		0.979911	0.945806	1.00851	1.00732	1.02496	1.0331	1.01105	1.0093	1.0129	1.00373	1.01848	0.985842		0.992717	1.00321	0.984822	0.995305	1.01707	1.00878	0.938676	1.05564	1.00069
22	1.02408	1.00219	1.00735	0.995112	1.05361	1.00924	0.985297	1.00888	1.02399	1.03493		0.971269	0.991627	1.02386	1.02505	0.996342	1.02193	0.999918	1.02698	1.0132	1.00968		0.979118	1.00745	1.01984		0.967628	0.954537	1.00978	1.01736	1.02398	1.01689	1.01697	1.01908	1.01756	1.006	1.01791	0.982261		0.995432	1.00174	0.981119	1.01317	1.01217	1.02618	0.927828	1.04699	0.996997
22.033	1.00194	1.01032	0.995387	1.00025	1.05621	1.0182	0.992036	0.997333	1.03142	1.02742		0.983811	1.00238	1.00244	1.01533	0.992155	1.0242	1.00767	1.0218	1.0055	1.00825		1.00555	1.0237	1.02362		0.991526	0.943093	1.00889	1.01964	1.01838	1.01143	1.01067	1.00341	1.01608	1.0218	1.03827	0.987713		0.996159	0.996349	0.984981	1.00617		1.01703	0.934548	1.06567	0.986958
22.067	1.01674	1.00839	0.996282	1.0099	1.05298	1.01863	0.99711	1.00817	1.04696	1.02806		0.99448	1.00699	1.0145	1.01952	0.994445	1.02032	1.01063	1.0186	1.00473	1.00765		0.993469	1.01321	1.01244		0.983138	0.943623	1.00604	1.02929	1.01582	1.01244	1.0142	1.00363	1.03287	1.00522	1.03964	0.978132		1.00271	0.990416	0.984055	1.02403	1.0142	1.01176	0.924257	1.05311	0.990814
22.1	1.0059	1.0157	1.00303	1.00927	1.05038	1.00009	0.987218	1.01231	1.05775	1.03447		1.00335	0.995288	1.00592	1.02141	0.993889	1.01718	1.01104	1.02575	1.01327	1.01418		1.00919	1.01057	1.00749		0.974329	0.95198	1.00731	1.00826	1.02415	1.01261	0.997528	1.01606	0.999391	1.01875	1.02564	0.99597		1.00847	0.992266	0.982746	1.011	1.02415	1.0061	0.927502	1.06649	0.995069
22.133	1.0048	1.01615	1.00258	1.0114	1.03781	1.00777	0.994828	1.00312	1.06161	1.03136		1.0089	1.02061	1.01663	1.02868	0.991762	1.01912	1.00248	1.02296	1.00701	0.995781		1.01039	1.02029	1.01355		1.00051	0.94565	1.01598	1.01453	1.00808	1.0132	0.998451	1.02121	1.00669	1.01843	1.01985	0.984907		1.01215	1.00027	0.981979	1.0205	1.01217	1.02156	0.938024	1.05213	0.988321
22.167	1.007	1.01021	1.00321	1.0176	1.04194	1.02502	1.00008	1.0162	1.04032	1.02962		1.00497	1.00429	1.01069	1.01801	0.99729	1.01695	1.00009	1.02058	1.02366	1.01299		1.00225		1.0067		0.985174	0.943687	1.01202	1.0081	1.01896	1.01202	1.0066	1.01164	1.00312	1.02125	1.02138	0.973616		0.993609	0.993033	0.983288	1.02066	1.02543	1.00164	0.939531	1.05172	0.995468
22.2	1.00103	1.02428	0.995201	1.00396	1.0554	1.01881	1.00621	1.0079	1.04438	1.02962		1.00865	1.01121	1.01013	1.02014	0.99729	1.01347	0.99432	1.01524	1.00879	1.00375		1.00732	1.00513			0.986191	0.947898	1.02354	1.00127	1.01261	1.00347	1.0099	1.01503	0.994502	1.01108	1.02701	0.964423		1.00016	1.00097	0.980669	1.0259	1.01798	1.00066	0.943333	1.04699	0.988156
22.233	1.01122	1.00756	1.0069	1.00095	1.04669	0.999489	1.00218	1.00854	1.04627	1.03887		1.01215	1.01679	1.0237	1.02796	0.992155	1.01501	0.99292	1.02157	1.01225	1.02952		1.00265	1.01243	1.00827		0.985174	0.963178	1.01995	0.99201	1.00743	1.01035	0.997304	0.995158	1.0164	1.00787	1.02428	0.968164		1.01503	0.998741	0.987693	1.0078	1.02106	1.0069	0.941825	1.04838	0.991447
22.267	1.01012	1.0177	1.01365	1.00759	1.04409	1.01613		1.01919	1.05656			1.01419	1.01066	1.01719	1.02606	0.985908	1.01905	0.991931	1.00135	1.01428	1.01418		1.00966		1.01032		0.994157	0.961589	1.02803	0.999388	1.01995	1.00934	1.00415	1.00811	1.00126	1.00975	1.04463	0.961617		1.00711	0.995966	0.983989	1.02486	1.0185	0.986982	0.944677	1.05034	0.992645
22.3	1.00012	1.00711	0.994568	1.00502	1.0484	1.02588	1.01146	1.00962	1.04528	1.02761			1.01066	1.01315	1.02835	1.00321	1.00097	0.996709	1.02041	1.0175	1.00561		1.00579	1.01337	1.01071		0.988823	0.966484	1.01951	1.01398	1.02786	1.01077	0.993996	1.01591	1.0018	1.01023	1.03281	0.963327		1.01926	0.996349	0.981212	1.02543	1.00961		0.947528	1.05034	1.00116
22.333	0.991294	1.00446	0.992592	1.00183	1.04993	1.01777	1.00106	0.996359	1.02953	1.02916		1.02016	1.01392	1.01394	1.01919	0.993727	1.01678	1.0136	1.0333	1.02198	0.993323		0.987897	0.992543	1.00403		0.983909	1.01413	1.01539	1.00849	1.03288	1.01018	1.00583	1.01481	0.994342	0.996086	1.03611	0.977811		1.0048	0.991341	0.97805	1.0128	1.00269	1.00432	0.940251	1.04642	0.981807
22.367	0.999471	1.00995	1.01689	1.00883	1.04885	1.02984	1.00885	1.00745	1.04786			1.01684	0.997364	1.02981	1.02204	0.99981	1.00355	1.00487	1.03593	0.997065	0.998413		1.00015	1.00023	1.02551		1.00272	0.971224	1.01458	1.01343	1.03189	1.0132	0.996922	1.00966	0.996979	1.00437	1.03087	0.987552		1.00152	0.98895	0.986767		1.02159	0.985842	0.944052	1.05075	0.992246
22.4	1.01214	1.0062	1.00862	1.00865	1.03907	1.01931	0.986889	1.00394	1.00993	1.03557		1.03408	1.01026	1.01275		0.989309	1.01444	1.01046		1.00847	1.01334		0.97992	1.00303	1.01371		1.00111	0.986815	1.01301	1.00716	1.04086	1.02033	1.01283	1.00348	1.01515	1.0068	1.02661	0.990519		1.00384	0.993191		1.02366	1.01798	1.0009	0.939463	1.04659	0.991846
22.433	1.00415	1.01369	1.00124	1.01078	1.03323	1.02534	0.986634	1.00006	1.02736	1.0287		1.03698	1.00874	1.02386	1.02868	0.999973	1.01331	1.0089	1.02722	0.996644	1.00842		0.99781	1.00452	1.01182		1.00332	0.954291	1.0175	1.00205	1.03131	1.01379	1.00637	1.01805	1.00598	1.00172	1.01728	1.01132		0.998805	0.994341	0.998487	1.0124	1.01835	1.00576	0.943428	1.04977	0.9839
22.467	1.00993	1.01588	0.99971	1.00608	1.05056		0.975001	0.997891	1.01161	1.03512		1.02461	1.016	1.02426	1.02164	0.999187	1.01895	1.01268	1.03535	1.00291	1.00698			0.998529	1.00859			0.960995	1.01226	1.01359	1.02513	1.02051	1.02136	1.00311	1.023	1.01101	1.01301	1.00845		0.979308	1.00936	0.985682	1.0132	1.00999	1.00593	0.933924	1.04504	1.00541
22.5	1.01039	1.01653	1.00403	0.990675	1.02848	1.02784	0.973335	1.00088	1.01448	1.02669		1.02317	1.01082	1.0187	1.03761	0.983551	1.01444	1.00231	1.02623	1.01085	1.01147		1.00619	0.999622	1.03952		1.00949	0.956629	1.02109	1.01265	1.02909	1.0163	0.99654	0.999728	1.00521	1.02086	1.00682	0.990065		0.988577	1.00142	0.995167	1.01649	1.00999	1.00123	0.943102	1.04169	0.987756
22.533	1.00442	1.00355	1.01357	0.995188	1.03323	1.03784	0.977103	0.994378	1.00993			1.01455	1.00023	1.03806	1.03437	1.00014	1.02243	1.01862	1.01653	1.00004	1.01681		1.00095	1.00056	1.01843		1.0089	0.967698	1.01152	1.01697	1.04318	1.02319	1.00745	1.01305	1.00203	1.00577	0.999421	1.01584		0.987617		1.01082	1.01513	1.02437	1.00512	0.934318	1.05017	0.998828
22.567	1.01058	1.0104	1.01033	0.996692	1.03171	1.02913	0.98935	1.00764	1.02547	1.0287		1.02546	1.00462	1.02409	1.0256	1.01136	1.0263	1.01442	1.03181	1.00518	0.99901		0.99474	0.999396	1.01505			0.975681	1.00913	1.00449	1.03806	1.01143	0.997304	1.01716	1.00933	1.02086	1.02991	1.01507		1.00265	1.00381	0.999638	1.01706	1.01925	1.01314	0.959883	1.05115	0.991282
22.6	1.01526	1.01433	0.997734	0.996692	1.04383	1.02577	0.975692	0.998077	1.02646	1.03887		1.01539	1.00541	1.03116	1.03398	1.01309	1.02744	1.01681	1.00166	1.01963	0.996377		0.991837	1.00747	1.01938		1.01806	0.963707	1.01257	1.01886	1.03469	1.01101	0.989159	1.02143	1.00242	1.02008	1.03281	1.01132		1.00112	1.01121	1.00171	1.00306		1.01817	0.944215	1.0474	0.9973
22.633	1.00754	1.02266	1.01529	0.993501	1.03881	1.01499	0.975256	1.00394	1.02141			1.01539	1.00135	1.02291	1.02639	0.994052	1.03115	1.00626	1.02746	1.01683	1.00579		0.996911	1.00072	1.02111		1.01153	0.984567	1.01997	1.00654	1.0454	1.00253	1.01137	0.995158	0.994954	1.00671	1.03087	1.0149		1.00768	1.0233	1.00989	1.00346	1.01526	1.00334	0.936775	1.04642	0.986861
22.667	1.0024	1.00968	1.00683	0.989869		1.01999	0.991707	0.996994	0.982494	1.03667		1.01582	1.01194	1.02751	1.02639	0.999973	1.02252	0.99473	1.01514	1.01456	1.00171		0.979989	1.01214	1.01922		1.01381	0.967698	1.01025	1.00504	1.04284	1.01428	1.01429	0.994274	1.00016	1.0161	1.03997	1.01468		0.991854	1.0012		1.00926		1.00626	0.955851	1.0549	0.986861
22.7	1.00533	1.02266	1.00701	0.991373	1.04338	1.0187	0.979894	1.00024	0.998938			1.02401	1.0035	1.02925	1.02812	1.00337	1.02179	0.987562	1.007	1.02131	1.0007		0.99651	1.0189	1.04125		1.01992	0.973498	1.00427		1.03353	1.00722	1.01083	1.00348	1.01213	0.99913	1.0472	1.02558		1.00384	1.00991	0.995775	1.00403	1.02	1.00529	0.963454	1.04683	1.01399
22.733	1.00415	1.02175	1.0116	0.986678	1.05353	1.0212	0.991707	1.00286	0.993977	1.0331		1.01847	1.00445	1.03671	1.02907	0.985448		1.00009	1.01473	1.00686	1.01587		1.00586	1.00786			1.01865	0.972439	0.992463	0.991781	1.04786	1.01755	1.00698	0.996925	1.0174	1.00648	1.02331	1.00113		1.0036	1.02161	1.00264	0.994699	1.00584	1.00271	0.939953	1.04838	0.993044
22.767	1.00396	1.01115	1.00098	0.99262	1.05487	1.01827	0.986453	1.00828	1.0119	1.03072		1.02137		1.04361	1.03634	0.988524	1.03502	0.99275	1.02327	1.0197	1.00934		1.00352	1.00615	1.02385		1.0117	0.970036	1.00197	1.01242	1.04687	1.02166		0.961389	1.01065	0.996475	1.05123	1.01016		0.998805	1.01399	1.00079	0.997598	1.00366	1.01874	0.943198	1.04504	0.982605
22.8	0.992743	1.01316	1.00403	0.99075	1.04859	1.0187	0.982431	1.01153	1.0224	1.03246		0.997729	1.00158	1.02751	1.02472	1.00108	1.01671	0.991521	1.03099	1.02561	1.01485		1.00973	1.00802	1.00143		1.01458	0.972064	1.00324	1.00826	1.04687	1.02368	1.0192	0.972422	1.0219	0.995147	1.03651	0.995677		1.00903	1.01137	0.998169	0.977568	1.00419	1.01226	0.94146	1.05213	0.991681
22.833	0.998714	1.00567	1.02058	0.992254	1.04859	1.01517	0.987069	1.01847	1.01576	1.03842		1.00635	1.00215	1.0233	1.01611	0.983551	1.01751	0.987972	1.03215	1.00704	1.00094		0.997644	1.02302	1.01094		1.02009	0.98148	1.00758	1.0041	1.03895	1.02527		0.96919	1.0146	1.00453	1.04737	1.00245			1.0019	0.994624	0.979901	1.02181	1.01146	0.94795	1.04879	0.96904
22.867	1.00689	1.01581	1.02472	0.999078	1.04859	1.01413	0.984967	1.00999	1.021	1.01478		1.00388	0.999837	1.0164	1.03729	0.995001	1.04084	0.983194	1.02147	1.01819	1.01197		1.01844	1.01851	1.01567		1.02585	0.97696	0.981466	1.00638	1.02725	1.02284	1.0129	0.988909	1.02998	1.00476	1.03787	1.01032		1.00304	1.0153	0.993315	0.972502	1.0176	1.02061	0.946049	1.05311	0.981807
22.9	1.00598	1.00457	1.02256	0.99262	1.05703	1.02863	0.99678	1.01956	1.0112	1.02825		1.00592	0.985029	1.0187	1.03271	0.999025	1.02817	0.984593	1.00183	1.01676			0.993538	1.01214	1.00544		1.01356	0.973717	1.00225	0.997826	1.01671	1.03216		0.967057	1.03666	0.999841	1.03667	1.00019		0.994171	1.01476	0.997402	0.986099	1.01233	1.02118	0.935364	1.05213	0.97426
22.933	1.02857	1.00631	1.02364	0.988106	1.0529	1.03613	0.993808	1.00323	1.03052	1.04748		1.00405	1.00963	1.01696	1.01422	0.987182	1.02817	0.989372	1.01752	1.00231	0.99866		0.999746	1.02302	1.01684		1.02297	0.980047	0.998814	0.992724	1.02486	1.02931	1.01643	0.971841	1.02641	0.979442	1.0398	1.00471		1.0044	1.00582	0.99309	0.989965	1.00871	1.0177	0.919235	1.0527	0.988789
22.967	1.0124	1.03472	1.02867	0.991921	1.04554	1.01645	0.992758	0.998	1.02695	1.03997		1.01514	0.998088	1.01141	1.0169	1.00321	1.02938	0.987972	1.02368	0.981109	1.00214		1.00732	1.01237	0.999374		1.01069	0.981855	0.997236	1.00049	1.0149	1.01755		0.995158	1.02213	0.986403	1.03571	1.00751		0.999765	1.01753	0.9944	0.995762	1.00743	1.00499	0.967976	1.05882	0.98317
23	1.01085	1.02394	1.02651	0.994231	1.04706	1.02199	0.988735	1.01605	1.03388	1.03777		1.01037	1.00135	1.02212	1.00528	0.993889		0.990941	1.01595	0.997833	1.00561		0.996607	1.01198	1.01205		1.01764	0.987125	1.00972	1.0041	0.997606	1.01915	1.01773	0.993756	1.02158	0.987181	1.03804	1.01374		0.985862	1.01306	0.991781	0.983698	1.00253	1.01001	0.952539	1.05409	1.0099
23.033	1.00708	1.01974	1.01671	1.0015	1.04985	1.01517	0.987249	1.01515	1.01834	1.03933		1.01702	0.992911	1.02935	1.015	1.01276	1.02333	0.995309	1.01776	0.99234	1.00459		1.00031	1.01594	1.01055		1.01255	0.971096	1.01226	1.00104	1.02306	1.0226		1.00016	1.01956	1.00172	1.0378	1.01055		0.988015	1.01029	0.984915	0.991663	1.00653	1.00807	0.943034	1.06493	0.998498
23.067	1.02123	1.01645	1.01391	0.99379	1.04706	1.01724	0.976487	1.02281	1.02814	1.03933		1.01557	0.983281	1.04236		1.00534	1.02413	0.984353	1.01259	0.997413			0.970574	1.02495	1.02763		1.01153	0.973808	1.01331	0.997503	1.00494	1.01974	1.0192	1.00016	1.01265	1.00055	1.02268	1.02293		1.00208	1.01491	0.99686	0.990696	1.00615	1.00985	0.951819	1.04781	1.01416
23.1	1.00194	1.0149	1.03452	0.991222	1.05335	1.02077	0.985508	1.0119	1.01953	1.04107		1.02649	0.996176	1.01101	1.01618	1.01489	1.01437	0.987322	1.00946	0.999268	1.00723		1.00635	1.01369	1.01906		1.01483	0.968383	1.01802	0.998446	1.02405	1.01571		1.02253	1.01622	1.0079	1.02541	1.02387		1.00016	1.01715	1.00657	0.980399	1.0094	1.00612	0.936382	1.04977	0.997768
23.133		1.01425	1.01868	1.00274	1.05227	1.02327	0.985328	0.997102	1.01694	1.04593		1.01624	0.998088	1.02133	1.01484	1.00897	1.01865	0.99251	1.01776	0.998253	1.00189		1.01159	1.01726	1.02228		1.00746	0.957999	1.00449	1.00205	1.01886	1.02277	1.0129	1.01405	1.02142	0.998286	1.03201	1.02068		1.00288	1.00952	1.00973	0.993029	0.997946	1.01236	0.927434	1.04879	1.00066
23.167	1.03005	1.01846	1.01022	0.995295	1.04123	1.03405	0.984022	0.995122	1.0639	1.05033		1.01974	0.995944	1.02307	1.01183	1.00913	1.01848	0.988552	1.01538	1.01067	1.00189		1.01063	1.0077	1.01332		1.00848	0.968538	1.02056	1.00755	1.02405	1.02218		1.01582	1.01731	1.01486	1.03064	1.0111		1.00384	1.00636	1.00734	0.999462	0.99102	1.02152	0.936775	1.05743	1.0094
23.2	1.0159	1.02394	1.0068	1.00362	1.04599	1.02845	0.976848	1.00035	1.08678	1.03686		1.01027	0.997528	0.999182	1.02518	0.993103	1.02704	1.00248	1.01578	1.00518	1.00884		1.00208	1.00117	1.0038		1.03406	0.968849	1.00972	1.003	1.00354	1.01588	1.00399	1.0089	1.00946	0.996408	1.04174	1.01655		1.01943	1.016	0.998778	0.992698	0.998631	0.99472	0.931467	1.04838	1.00009
23.233	1.01103	1.02129	1.00266	1.00681	1.04491	1.03198	0.973876	1.00992	1.08498	1.04236		1.02094	1.02117	1.01854	1.01602	1.01214	1.02236	0.990361	1.02269	1.00619	1.00944		0.977749	1.00023	1.01788		1.02399	0.942189	1.00247	1.01909	0.995798	1.00841	1.01512	1.02009	1.00123	0.998514	1.05363	1.01935		1.00536	1.016	1.00494	1.00106	1.00662	0.992942	0.920618	1.05392	1.00644
23.267	1.01986	1.00585	1.00527	1.01151	1.04491	1.01267	0.981666	0.99557	1.05734	1.06516		1.01539	1.00755	1.00497	1.02534	1.02045	1.01163	1.00667	1.01555	0.996224	1.00105		0.995639	1.02705	1.01977		1.02171	0.960337	0.99993	1.00943	0.994808	1.01042		1.01582	1.01638	0.990614	1.03384	1.02745		1.00999	1.01839	1.00178	0.991	0.987557	1.00039	0.979257	1.0549	0.999131
23.3	1.02206	1.02814	1.01175	1.01257	1.04662	1.0187	0.975542	1.00577	1.04951	1.03815		1.01112	1.00676	1.02202	1.00496	1.01341	1.02664	0.99514	1.02327	0.991746	1.01046		1.00402	1.02051	1.02055		1.03645	0.952729	0.996183	1.01171	0.997776	1.02016	0.99654	1.02576	0.997818	0.996475	1.03271	1.0248		1.00615	1.0247	1.00194	0.989067	0.990271	1.00233	0.96454	1.04977	1.00651
23.333	1.02629	1.02614	1.00788	1.01496	1.03989	1.03009	0.978694	1.00252	1.0514	1.03906		1.00865	1.01273	1.02163	1.02076	1.00694	1.00485	0.99456	1.02722	0.993775	1.00224		0.998377	1.01694	1.00843		1.02009	0.959277	1.00786	1.00527	1.00453	1.00295	1.00268	1.02546	1.01747	0.994208	1.04574	1.02387		1.01615	1.01931	1.01589	0.997198	1.00368	0.978121	0.969522	1.05254	1.01848
23.367	1.01986	1.00805	1.01112	1.00982	1.03297	1.01784	0.97257	0.999718	1.05308	1.04722		1.0008	1.00469	1.02281	1.00741	1.00907	1.01123	0.997939	1.01398	0.98076	1.00673		1.00111	1.02984	1.00332		1.02153	0.974557	1.01833	1.00865	0.997776	1.00841	1.01159	1.02649	1.00155	1.00515	1.03818	1.01881		1.00672	0.995517	1.00826	0.998564	0.999006	0.984594	0.967785	1.05743	0.994641
23.4	1.01655	1.02458	1.01615	1.00406	1.02992	1.01931	0.972751	0.999455	1.06198	1.03751		1.0119	1.00755	1.02416	1.02914	1.02565	1.02252	1.00016	1.0134	0.988282	0.985034		1.00562	1.02853	0.999699		1.03178	0.98201	1.0196	0.990677	0.994568	1.00253	0.993073	1.01781	0.992769	1.01571	1.0475	1.03119		1.004	1.00407	1.00663	1.00733	1.00496	1.01042	0.965721	1.05034	1.01768
23.433	1.00791	1.03317	1.01309	1.00601	1.03729	1.02613	0.982897	0.981859	1.06218	1.04016		0.999954	1.01425	1.02607	1.02495	1.02146	1.02931	0.998589	1.00905	0.990731	0.998341		1.00659	1.00716			1.03567	0.964392	1.02769	1.03368	0.997946	1.01731	0.988619	1.02296	1.00885	1.00515	1.01822	1.01826		0.999203	0.999058	0.996383	1.01063	1.00609	1.01494	0.973881	1.05743	1.01246
23.467	1.01876	1.03719	1.01984	1.00406	1.02992	1.02656	0.97931	0.99557	1.06387	1.03861		1.0049	1.00835	1.01289	1.02132	1.01688	1.01253	1.0004	1.01677	0.990137	0.995287		1.00192	1.02479	1.013		1.0189	0.96673	1.01706	1.02097	0.998935	0.998077	0.992915	1.0153	1.00776	1.02251	1.04227	1.02652		1.01079	1.00592	1.0142	0.997432	1.00865	1.03761	0.966047	1.01234	1.00026
23.5	1.00966	1.02924	1.00553	1.0045	1.03297	1.01681	0.978694	0.986006	1.05476	1.02798		1.01557	1.00103	1.02265	1.0116	1.00226	1.01083	0.988283	1.02055		0.991811			1.01687	1.02284		1.01602	0.96146	1.01743	1.02042	0.986005	0.999921	0.988777	1.02436	0.991291	1.01179	1.03158	1.01094		1.01175	1.00907	1.00379	0.989467	1.01339	1.00911	0.948546	1.06551	1.00797
23.533	1.01655	1.03181	1.00553	0.99148	1.04643	1.01931	0.971955	0.990154	1.03971	1.03751		1.0096	1.01082		1.01903	1.00907	1.00478	1.00419	1.02113	0.993181	1.00944		1.00425	1.02122	1.01544		1.02339	0.973279	1.01294	1.02246	1.0005	0.989592	0.995459	1.02097	0.998205	1.00632	1.02265	1.03422		1.01463	0.992901	1.00788	0.994699	1.01595	1.01146	0.942939	1.06135	1.01439	0.957532
23.567	1.0172	1.04596	1.0264	0.992103	1.05119	1.00767	0.970289	0.99475	1.05812	1.04392		0.998681	1.01425	1.01995	1.02243	1.00874	1.00695	1.00081	1.02664	0.97121	1.02071			1.02479	1.00993		1.01026	0.958748	1.01384	1.02325	0.995148	1.00135	0.992691	1.03502	0.998751	0.995147	1.04027	1.02332		1.02174	0.998292	0.997309	1.0013	1.02212	1.02239	0.93091	1.05075	1.00877	0.955012
23.6	1.0183	1.03646	1.0049	1.00087	1.05945	1.02613	0.977463	0.987987	1.05406	1.02669		0.988788	1.00119		1.02361	1.0108	1.00792	0.99644	1.00979	0.99563	1.00435		1.00869	1.01578	1.00876		1.01416	0.959652	1.01638	1.01453	1.00586	1.00295	1.00637	1.01994	0.996113	0.991875	1.04261	1.0301		1.01638	1.00646	0.998619	0.990599	1.01429	1.00951	0.919274	1.05017	1.00797	0.961667
23.633	1.01252	1.03208	1.00814	0.994671	1.04733	1.01492	0.965035	0.998263	1.05784	1.02981		1.00568	1.00079	1.01036	1.01428	1.00835	1.01785	0.988862	1.02902	0.997557	1.01112		0.991934	1.02891	0.992072		1.03051	0.950016	1.00554	1.00205	0.993749	1.00858	0.98655	1.02987	0.992543	0.973809	1.02201	1.02558		1.00966	1.00777	1.01219	0.995099	1.00917	1.00093	0.928615	1.05172	1.00644	0.982608
23.667	1.01077	1.06469	1.00553	0.985463	1.05316	1.01035	0.979384	0.988885	1.06021	1.03045		0.989212	0.99522	1.01782	1.02747	1.00432	1.01397	0.990842	1.02228	0.991224	1.01053		0.988229	1.01935	1.00403		1.01051	0.95198	1.01294	1.02364	0.988153	1.02252	1.00154	1.02082	1.01197	0.97802	1.01019	1.01881		1.01446	0.991976	0.999769		0.997946	1.0189	0.92347	1.05172	1.02426	0.982775
23.7	1.00655	1.04377	1.0049	0.985903	1.05056	1.02948	0.976413	0.995833	1.05377	1.0309		1.00423	1.00867		1.00479	1.01057	1.01066	0.992411	1.02031	0.985311	0.996203		0.98122	1.01601	0.983176		1.01441	0.964922	1.0095	1.01038	0.997875	1.01446	0.998926	1.0125	0.990292	0.979898	1.01872	1.00736		1.01966	1.00553	0.998619	0.997598	0.996137	1.01186	0.917143	1.05075	1.01422	0.97612
23.733	1.00453	1.02988	1.01291	0.981208	1.05316	1.02845	0.977463	0.996731	1.03893	1.03777		1.01207	1.00732	1.02258	1.01743	1.01705	1.01009	0.976917	1.02803	0.986746	1.00849		0.988395	1.0237	0.984904		1.03016	0.977425	1.00755	1.01171	1.00166	1.00875	1.00745	1.01832	0.990904	0.995925	1.01678	1.01335		1.01175	0.995134	1.00788	0.989867	0.998851	1.00385	0.91698	1.04781	1.02001	0.986674
23.767	1.00563	1.06469	1.00896	0.992544	1.05119	1.03363	0.974491	1.0172	1.05279	1.03182		1.01285	0.996176	1.01608	1.00503	1.01001	1.01203	0.978486	1.0213	0.967398	1.014		0.992501	1.01958	1.00693		1.0249	0.970941	1.0196	1.01382	0.998695	1.01362	0.992085	1.01765	1.01055	0.991553	1.02241	1.01242		1.0183	1.00962	1.01551	0.995099	1.01934	1.01672	0.924651	1.03875	1.02483	0.987649
23.8	1.00829	1.03976	1.02137	0.990857	1.06376	1.02466	0.983948	0.996282	1.05496	1.0287		1.01122	1.00851	1.01759	1.01	1.00733	1.02309	0.976677	1.02228	0.978804	1.00705		0.985893	1.00046	1.00866		1.02143	0.991271	1.0187	1.01587	0.999105	1.0106	1.0036	1.02936	0.99991	0.984364	1.01678	1.01335		1.02605	0.992901	0.992296	1.00226	1.01648	0.999956	0.921799	1.04699	1.00797	0.990976
23.833	0.9981	1.0393	1.0103	0.995553	1.04814	1.04105	0.973801	0.997179	1.0523	1.03292		1.00303	1.00023	0.999413	1.00849	1.02029		0.983434	1.01694	0.986499	1.0185		0.98646	1.02409	1.01567		1.02676	0.980576	1.02192	1.01453	1.0005	1.01279	1.02505	1.01412	0.996726	0.971543	1.02281	1.00058		1.03141	1.00777	0.989134	1.00033	1.01323	1.01931	0.925995	1.06314	1.01568	0.989431
23.867	1.00673	1.02587	1.01049	0.994747	1.03773	1.0332	0.96409	1.00439	1.05824	1.02916		0.992959	1.01098	1.00457	1.00849	1.01973	1.02002	0.982614	1.0199	0.988108	1.0146		1.00315	1.02067	1.01189		1.01778	0.981325	1.01976	1.02702	1.00907	1.00614	1.0043	1.02015	0.996726	0.974359	1.02241	1.01148		1.02678	1.00368	0.981502	0.995665	1.01941	1.01008	0.938581	1.05075	1.02074	0.997228
23.9		1.0519	1.02129	1.01848	1.03818	1.0313	0.971445	1.01026	1.0523	1.03026		1.00857	1.00716	1.00569	1.00526	1.01705	1.02446	0.99275	1.0084	0.991224	1.00154		0.996939	1.0115	1.01873		1.02108	0.984632	1.02874	0.996332	1.0164	1.01018	1.01114	1.03259	1.00216	0.975848	1.01445	0.989838		1.01423	0.994975	0.992679	0.997198	1.02175	1.00344	0.927733	1.05784	1.01223	0.997228
23.933	1.00499	1.0373	1.01607	0.99926	1.03989	1.01052	0.969779	1.00304	1.05418	1.02916		1.0084	1.01178	1.0122	1.00866	1.0108	1.01163	0.989372	1.01555	0.993079	0.998239	0.991618	1.00435	1.01057	1.03652		1.02396	0.982979	1.01737	1.01697	1.01401	0.999258	1.00154	1.0253	1.00441	0.975848	1.02781	0.997		1.03022	1.00129	1.00571	1.0034	1.02814	1.02142	0.926945	1.05075	1.00485	0.993329
23.967	1.01187	1.0309	1.01417	1.00741	1.03989	1.02277	0.983693	1.00151	1.04844	1.03072		1.00115	1.01042	1.0168	1.02162	1.01822	1.01728	0.982614	1.01752	1.0083	0.999082	1.01035	1.00008	1.01205	1.02251		1.0315	0.969507	1.01969	1.0238	1.02496	1.01261	1.01913	1.02015	1.00419	0.980931	1.03031	1.00432		1.02598	1.00576	0.986515	1.00533	1.0341	1.01947	0.934942	1.04169	1.01376
24	1.00811	1.02999	1.00437	1.00209	1.03253	1.03277	0.980976	0.991314	1.05558	1.03026		1.01395	1.00828	1.00569	1.01474	1.00835	1.0264	0.992341	1.01793	0.999586	1.00028	1.01625	1.00088	1.01057	1.01528		1.02006	0.980796	1.02329	1.01054	1.00931	1.00959	1.0093	1.015	0.994088	0.980609	1.02854	1.01461		1.02886		0.990219	1.01329	1.01579	1.024	0.933041	1.0527	1.00967	0.989431
24.033	1.00388	1.02405	1.00914	1.0004	1.02408	1.02406	0.98797	1.02019	1.0623	1.02632		1.009	1.04093	1.01893	1.00882	1.01087	1.01922	0.991931	1.01932	0.989195	1.0001	1.02614	1.00749	1.00513	1.0111		1.0221	0.984942	1.01895	1.03079	1.01565	1.00816	1.0169	1.01287	0.995407	0.982098	1.03571	1.015		1.03022	1.00745	1.00063	1.01876	1.04486		0.924257	1.03696	1.01954	0.993733
24.067	1.01499	1.02825	1.01779	0.997391	1.04465	1.02302	0.998117	1.00413	1.06349	1.03713		1.01395	1.02787	1.00957	1.01451	1.00289	1.02931	0.983364	1.01932	0.988949	0.988654		1.00612	1.0087	1.02417		1.01574	0.975526	1.02598	1.01847	1.02636	1.00413	1.00691	0.997568	0.994794	0.992881	1.02774	1.01422		1.02406	1.01061	0.983896	1.00653	1.02453	1.0244	0.932811	1.03933	1.03061	1.00721
24.1	1.01343	1.0267	1.01626	0.993759	1.03773	1.02449	0.994784	1.00999	1.04893	1.03713		0.99031	1.02691	1.01338	1.0187	1.00518	1.0247	0.984184	1.00445	0.993079	1.01053	1.03563	1.00475	1.01903	1.02		1.0188	0.973343	1.00646	1.01015	1.03213	1.00875	1.01783	1.00022	0.996499	1.00055	1.04327	1.03338		1.03062	0.998133	0.97965	0.995265	1.03086	1.02675	0.935662	1.04031	1.0095	0.992926
24.133	1.02096	1.02451		0.999518	1.02821	1.01199	0.983407	1.01171	1.04943	1.05325		1.00635	1.01807	1.00513	1.02345	1.00724	1.0134	0.989951	0.994855	1.00018	1.01664	1.04054	1.00145	1.01266	1.00899		1.00693	0.978987	0.979169	1.0132	1.02916	1.00816	1.0169	0.989552	0.984697	1.00453	1.03707	1.01968		1.0283	1.01392	0.982044	0.997198	1.03395	1.02652	0.938907	1.05507	1.01825	1.00136
24.167	1.01362	1.01656	1.03057	0.995446	1.03602	1.02259	0.976052	1.01324	1.05923	1.04885		0.996032	1.0277	1.01108	1.01144	1.00629	1.02874	1.0019	1.00125	0.997557	1.01274	1.02082	0.999677	1.00893	1.02055		1.01185	0.99698	0.996518	1.04616	1.03806	1.00733	1.01299	1.0153	0.991611	0.991553	1.02195	1.02474		1.03293	0.998133	0.982428	0.988266	1.0234	1.02085	0.941364	1.05091	1.02676	1.018
24.2	1.00563	1.03794	1.02535	0.994823	1.03602	1.02966	0.973335	1.01803	1.05468	1.03796		1.01232	1.02866	0.991559	1.01697	1.01388	1.01865	0.997698	1.00758	0.995282	1.00537	1.0155	0.996773	1.01585	1.00592		1.01287	0.980421	0.996518	1.02403	1.01978	1.01219	1.01283	1.01509	0.989586	0.976465	1.02934	1.01703		1.02694	0.9878	0.996701	0.995431	1.03251	1.02343	0.935038	1.04365	1.02563	0.984655
24.233	1.01537	1.01153	1.01887	0.995446	1.03665	1.02906	0.968262	0.998897	1.05111	1.03777		1.00473	1.01943	1.01456	1.01373	1.01806	1.00953	1.0033	1.00166	0.991398	1.03131	1.04217	0.994838	1.01607	0.999469		1.02168	0.983134	1.01439	1.02764	1.04086	1.01967	1.01267	1.00927	1.00178	0.991942	1.02701	1.01158		1.02711	0.999666	0.987759	1.00026	1.02724	1.02789	0.931793	1.06469	1.02892	0.976454
24.267	1.00076	1.01766	1.01428	0.988805	1.03989	1.0182	0.968262	0.996096	1.05447	1.04638		1.00575	1.00924	1.00671	1.01752	1.01087	1.01648	1.00412	1.00602	0.991992	1.01189	1.02343	1.00982	1.02206	0.987118		1.0149	0.986001	1.02232	1.01382	1.03329	1.00044	1.01452	1.00912	0.99991	0.988736	1.01928	1.00784		1.02423	0.997274	0.977508	0.988998	1.03176	1.0181	0.935038		1.01343	0.984488
24.3	0.994792	1.01701	1.0078	0.985614	1.04743	1.02406	0.968877	1.00151	1.04545	1.03887		1.01462	1.00963	1.00901	1.01199	1.02738	1.02059	0.999338	1.0052	1.00238	1.01393	1.0317	1.01353	1.03107	1.01048		1.01287	0.94007	1.01566	1.02253	1.04499	1.00103	1.01321	0.997417	0.994861	0.987798	1.02451	1.00838		1.03118	0.993733	0.978976	0.995031	1.01158	1.01867	0.943428	1.05345	1.01808	0.987649
24.333	1.00434	1.01592	1.01473	0.989246	1.03944	1.0282	0.959166	0.998449	1.03516	1.03402		1.0031	1.01019	1.00559	1.01334	1.00701	1.01591	0.990192	1.00503	0.993847	1.01741	1.05419	1.01086	1.01289	0.991681		1.00406	0.936079	1.02523	1.02009	1.04062	1.00893	1.02282	1.0086	1.00518	0.996247	1.02588	1.00051		1.04197	0.987576	0.991846	1.00066	1.01542	1.02725	0.943034	1.04422	1.01382	0.982943
24.367	1.00103	1.01857	1.01779	0.991814	1.03055	1.03491	0.953042	1.00756	1.03011	1.03402		1.01275	1.01346	1.0029	1.00931	0.99706	1.03205	0.990771	1.00207	0.989369	1.01147	1.04372	0.994506	1.03464	1.00168		1.00693	0.940445	1.01476	1.00817	1.04301	1.00347	1.02005	1.02479	0.993928	0.993042	1.03287	1.00558		1.02886	0.990575	1.00034	0.998164	1.01866	1.02564	0.939233		1.01166	0.984725
24.4	1.00149	1.00952	1.02084	1.00997	1.02624	1.02741	0.959602	0.997551	1.0313	1.03557		1.00533	1.02246	1.00941	0.994059	1.00259	1.01688	0.988382	1.00142	0.995108		1.01747	0.999579	1.01382	1.00051		1.00364	0.948272		1.02198	1.0295	1.00893	1.0169	1.01558	1.00014	1.00547	1.02918	1.01609		1.03925	1.00413	0.994241	1.00066	1.02175	1.03074	0.917075	1.05132	1.01728	0.992926
24.433	1.00149	1.00468	1.01283	0.991191	1.03918	1.02474	0.942971	1.00368	1.03031	1.04418		1.02179		1.02186	1.0007	0.993429	1.01825	0.990771	0.998055	0.988702	1.01597	1.04372	1.00328	1.01327	0.997675		1.01016	0.931933	1.02143	0.996237	1.03905	1.00833	1.01506	1.02552	0.980647	0.987409	1.03014	0.994515		1.03773	0.985184	0.992005	1.01216	1.01195	1.03681	0.943985	1.05132	1.01921	1.00486
24.467	1.00773	1.01857	1.02084	0.992878	1.04223	1.02802	0.940434	1.01612	1.01625	1.04529		1.01829	1.00979	1.01861	0.983946	0.990976	1.02252	0.999338	1.00734		1.0219	1.038	1.01029	1.01266	1.00507		1.0022	0.939385	1.02539	1.01554	1.0337	1.00875	1.01321	1.01948	1.00869	0.974748	1.02258	0.99545		1.03581	0.990351	0.989227	1.00443	1.02559	1.05576		1.05189	1.02227	1.01168
24.5	1.00571	1.00002	1.02219	0.992695	1.03442	1.0231	0.939999	1.01504	1.02794	1.05765		1.01215	1.00653	1.03123	0.993272	0.99935	1.02156	1.00371	1.01646	0.978557	1.01597	1.04234	1.01263	1.02315	1.00892		0.998475	0.93923	1.02898	0.994904	1.01285	1.00673	1.0093	1.00793	1.01187	0.997508	1.03851	1.00542		1.0279		0.987534	1.01353	1.0225	1.02709	0.94074		1.02596	1.01403
24.533	1.00525	1.01172	1.01589	1.00058	1.03855	1.02827	0.959421	1.019	1.02744	1.04904		1.01395	1.01903	1.00329	0.994614	0.99683	1.01801	1.00132	1.03092		1.01225	1.06107	1.00545	1.01414	1.00097		1.00255	0.943971	1.03459	1.00283	1.02957	1.00698	1.01175	1.02037	1.001	0.991164	1.02821	1.00971		1.03406	1.00206	1.00242	1.0132	1.02137	1.02749	0.936382	1.03909	1.02652	1.00365
24.567	1.01122	1.01875	1.02651	0.998454	1.0407	1.03863	0.944202	1.01747	1.01764	1.03402		1.02034	1.01138	0.998692	0.990589	0.989242	1.0143	1.00091	1.00316	0.978978	1.01428	1.04413	1.00682	1.00886	1.00208		1.00153	0.96505	1.03279	0.998284	1.02479	1.00051	1.02136	1.02	0.998431	0.987409	1.02724	1.00574		1.02111	1.01045	0.990855	1.01553	1.01685	1.0232	0.933694	1.04814	1.0356	1.00284
24.6	1.02648	1.00377	1.01652	0.997831	1.03271	1.03802	0.965725	1.0227	1.04873	1.03933		1.01377	1.01544	1.01322	0.978415	0.988849	1.01818	1.01319	1.01704	0.973659	1.02099	1.02695	1.00312	1.00661	1.00041		0.998228	0.947058	1.0402	1.00527	1.00965	1.01084	1.01267	1.00845	0.996886	0.998741	1.02974	1.00387		1.02942	0.997274	0.993249	1.03242	1.0234	1.03024	0.937332	1.05581		1.00244
24.633	1.01894	1.01346	1.00653	0.989063	1.04654	1.03698	0.948659	1.01964	1.06567	1.03512		1.0113	1.02022	1.01989	0.994452	0.990976	1.01801	1.00726	1.01884	0.985905	1.01547	1.05067	0.986196	1.00381	1.01443		1.00314	0.961214	1.031	1.00095	1.00371	1.00295	1.0086	1.02744	0.989199	0.991003	1.03674	1.00083		1.02598	1.00582	0.982998	1.02133	1.01994	1.03567	0.94002	1.05189	1.02107	1.01202
24.667	1.01628	1.00926	1.00653	0.985431	1.03963	1.04241	0.970799	1.01728	1.05517	1.04794		1.01292	1.00947	1.02298	1.0078	1.00069	1.01567	1.01442	1.0347		1.00666	1.03881		1.01881	1.0023		0.998649	0.953761	1.03069	1.00495	1.00965	0.99606	1.00936	1.02582	0.990518	0.988736	1.01872	1.01003		1.0283	0.996508	0.982072	1.02269	1.0283	1.04523	0.948574	1.05189	1.02436	1.00617
24.7	1.03336	1.01346	1.00743	0.997649	1.04375	1.03216	0.952427	1.02053	1.03893	1.03337		1.02384	1.00851	1.01108	0.995563	1.00733	1.0114	1.01425	1.025	0.981847	1.01691	1.03546	0.991671	1.00677	1.0053		0.990334	0.968292	1.03211	1.00911	1.01203	1.00152	1.01522	1.02457	1.00078	0.981776	1.02065	1.00987		1.01919	0.998741	0.97645	1.02423	1.0399	1.03657	0.938282	1.03852		1.00714
24.733	1.02381	1.01081	1.01175	0.987817	1.04007	1.03095	0.956449	1.02423	1.04873	1.04043		1.02589	1.0191	1.00648	0.998803	1.0018	1.011	1.02077	1.0296		1.02285	1.04257	0.986597	1.0049	1.00074		0.996018	0.956099	1.04221	0.995295	1.00685	0.994807	1.02266	1.04657	0.999297	0.986698	1.02724	1.01042		1.01264	0.995742	0.983474	1.01723	1.0292	1.03382	0.947393	1.04797	1.02782	0.996588
24.767	1.02868	1.0152	1.01283	0.98613	1.05004	1.02095	0.969313	1.00899	1.04229	1.01899		1.02154	1.01695	1.00934	1.00892	1.00733	1.01704	1.01599	1.02385	0.983876	1.02022		0.996911	1.02083	1.01592		0.992369	0.959716	1.02762	0.9938		1.00614	1.0156	1.0153	0.983218	0.988575	1.03464	1.00161		1.00609	1.00075	0.990181	1.02149	1.03628	1.03973	0.935757	1.04676	1.02084	1.0056
24.8	1.02602	1.01255	1.00806	0.992953	1.05156	1.01656	0.951121	1.01467	1.06427	1.02696		1.01787	1.01273	1.02846	1.00646	1.00236	1.0252	1.00248	1.03674	0.976108	1.02717	1.03963	0.991671	1.02814	1.01498		0.996265	0.960995	1.03047	1.0029	1.00429	1.00086	1.01636	1.03502	1.00225	0.991942	1.02571	1.00309		1.00665	1.01654	0.962972	1.0042	1.03666	1.03366	0.936708	1.0395	1.02044	1.00422
24.833	1.03575	1.01054	1.02714	0.987194	1.04788	1.01181	0.948404	1.00421	1.0306	1.03823		1.01684	1.01003	1.00799	1.00244	1.00425	1.03061	1.01582	1.02606	0.980166	1.03454	1.0501	0.999482	1.02363	0.999956		1.00016	0.96115	1.01963	0.987364	1.0047	1.01404	1.01137	1.0153	1.00078	0.986698	1.02321	1.01174		1.00506	1.00461	0.970604	1.0079	1.02431	1.0411	0.925466	1.0377	1.01714	1.00341
24.867	1.02134	1.01274	1.00392	1.00172	1.04528	1.02199	0.966341	1.0079	1.0311	1.02806		1.01377	0.990999	1.00934	1.01412	1.0052	1.00518	0.998348	1.0213	0.990731	1.0225	1.05443	0.995777	1.0133	1.00625		1.01058	0.963333	1.02883	1.00345	1.0033	1.0074	1.01951	1.03341	1.01087	0.983103	1.02924	1.01174		0.990991	1.00792	0.976543	1.00886	1.04193	1.02863	0.938215	1.03909	1.01618	0.994973
24.9	1.03374	1.00615	1.02021	0.992771	1.04985	1.03234	0.97203	1.00465	1.03803	1.01899		1.01829	0.990999	1.00204	1.02004	1.00236	1.00575	1.00947	1.0213	0.976036	1.02022	1.05877	0.990136	1.01407	1.01641		0.995073	0.961305	1.0126	1.00063	0.999924	1.00639		1.01192	0.990292	0.987087	1.01798	1.01454		0.99195	1.01632	0.959268	1.00693	1.04374	1.03648	0.932513	1.03852	1.01698	0.996351
24.933	1.03374	1.01913	1.02543	0.996843	1.04141	1.00699	0.940179	1.0116	1.03803	1.03026		1.01829	1.01481	0.997372	1.00155	1.00504	1.0005	1.0061	1.02844	0.980094	1.01674	1.04454	0.999482	1.02006	1.01436		0.992791	0.977864	0.997879	0.987203	1.00289	1.00941	1.00284	1.01619	1.00544	0.981776	1.02225	1.00551		0.988673	0.999759	0.968527	1.00943	1.02649	1.03899	0.925235	1.03102	1.02413	1.00576
24.967	1.01556	1.0194	1.01607	1.00198	1.05443	1.02923	0.953478	1.01078	1.04446	1.03292		1.01667	0.999441	0.986264	1.01222	0.999513	1.00461	0.999918	1.02409	0.979674	1.03022	1.04037	0.994809	1.00957	0.999564		1.01118	0.977864	1.00686	0.992534	1.00207	1.00639		1.02737	0.996433	0.982715	1.02208	0.9999		0.990195	1.01277	0.959427		1.03607	1.04546	0.928087	1.03281	1.01505	1.01202
25	1.02427	1.02205	1.0113	0.981617	1.0477	1.0288	0.9729	1.0162	1.0395	1.03136		1.0113	1.01807	0.998094	1.00993	1.00102	1.02326	0.997529	1.02507	0.980862	1.012	1.04806	0.989002	1.01571	1.01547		1.00957	0.973498	1.01015	0.996304	0.999924	1.00336	1.00914	1.01847	1.00242	0.989608	1.04034	1.00216		0.996749	1.00461	0.968911	0.996632	1.03357	1.03161	0.925629	1.03852	1.02123	1.01259
25.033	1.0183	1.02314	1.01805	0.99233	1.04141	1.03709	0.961523	1.00465				1.01539	1.01115	1.00808	1.0134	0.998172	1.00421	1.00272	1.02269	0.983732	1.02183	1.05101	1.00302	1.00786	1.00602		1.03059	0.976585	0.993169	0.988926	1.00149	1.02402	1.01191		0.992477	0.96921	1.02442	1.0129		0.984601	1.00662	0.982099		1.01813	1.0457	0.928874	1.03281	1.03616	1.00926
25.067	1.02252	1.01875	1.01634	0.997649	1.04357	1.02484	0.972285	1.00663	1.01941	1.03576		1.0043	0.992515	1.00125	0.999264	1.00962	1.01083	1.00709	1.01932	0.97908	1.00792	1.03146	0.990772	1.00204	1.00452		1.0222	0.98201	1.00581	0.987983	0.998525	1.01571	1.00415	1.01847	0.994568	0.986336	1.03294	0.997868		0.996749	1.01424	0.994969	1.00283	1.02936	1.05234	0.923335	1.05622	1.02589	1.00828
25.1	1.01765	1.0214	1.01004	0.996327	1.05982	1.03355	0.973155	1.0088	1.02753			0.996032	0.996572	1.00871	1.01167	1.00789	1.01333	1.0061	0.998125	1.01963	0.9936	1.03244	0.994477	1.00351	1.00168		1.02567	0.986376	0.993759		0.994738	1.01714	0.998926		0.994182	0.978048	1.03971	1.01064		0.988838	0.996984	0.972998	1.00806	1.02537	1.0521	0.92776	1.04365	1.03151	1.0061
25.133	1.01324	1.02095	1.02021	0.985431	1.04617	1.02898	0.963444	0.999237	1.0311	1.03686		0.998081	1.01019	1.00792	0.999101	1.00046	1.02286	1.01483	0.997307	0.994543	1.0114	1.02811	0.987869	1.00483	1.00625		1.02076	0.972374	1.01074	0.985318	1.00487	1.01327	1.0106	0.993605	1.00016	0.994236	1.03408	0.997321		1.00155		0.97616	1.00766	1.03245	1.04077	0.935988	1.03362	1.01891	1.00334
25.167	1.01058	1.0225	1.00266	0.994823	1.04509	1.02691	0.966596	0.992103	1.04041	1.03842		0.998257	1.00749	0.999115	0.994519	0.997223	0.99228	0.996949	0.984241	1.01169	1.00038	1.00029	0.985767	1.01121	0.997512		1.01178	0.958373	1.00423	0.987203	0.997296	0.999085	1.01929	1.02436	0.997752	0.975004	1.04357	0.993192		0.9894	0.993985	0.982099	1.00846	1.02287	1.0351	0.927041	1.0399	1.021	1.00862
25.2	1.00084	1.0256	1.01958	1.00935	1.02472	1.02234	0.960037	1.00212	1.03913	1.05079		0.988188	1.00749	1.00602	1.00155	0.990353	1.01868	1.00412	0.966412	0.998848	1.00385	1.01845	1.00536	1.00989	0.99924		1.02016	0.97253	1.01126	0.987755	0.97918	0.999921	1.0219	1.00141	1.00273	0.997602	1.03777	1.00464		0.998271	1.01277	1.00107	1.0112	1.03741	1.047	0.936219	1.04129	1.02453	0.995878
25.233	1.00039	1.02095	1.0113	1.00785		1.04166	0.963624	0.992551	1.03724	1.03971		0.980168	1.00462	1.01824	1.00535	1.00118	1.02312	1.00832	1.00248	1.01557	0.999781	1.03702	0.994076	1.0161	1.00263		1.01034	0.968538	0.998623	0.983137	0.9917	1.02444	1.00799	1.00729	1.00646	1.00065	1.03681	1.00409		0.989236	1.00138	0.989731	1.00846	1.03236	1.04935	0.924746	1.04365	1.01522	0.98687
25.267	1.00966	1.01126	1.02282	0.999518	1.02732		0.94884	0.997968	1.03626	1.03906		0.976246	1.00119	1.01117	0.990656	0.982535	1.00407	0.987633	1.00248	1.01491	1.00224	1.01157	1.00649	1.01439	0.985944		1.02076	0.952729	1.00491	0.994285	1.00661	0.999921	1.02113	1.01457	1.00119	0.98517	1.03214	0.998483		0.99483	0.983361	0.987337	1.01619	1.03236	1.047	0.929729	1.03558	1.00863
25.3	1.01187	1.01346	1.02192	0.989246	1.02992	1.02373	0.946303	1.02513	1.02765	1.04236		0.982393	0.99888	1.01387	0.98987	0.974161	1.01828	0.972888	1.0134	1.00375	0.991389	1.01886	0.990371	1.00957	0.99735		1.02304	0.966885	0.996762	0.999778	1.00941	1.0147	1.00761	1.01067	0.999711	0.985559	1.00922	1.00526		0.986356	0.997301	0.990882	1.01209	1.03544	1.03963	0.935892	1.04365	1.00687	1.00351
25.333	1.00453	1.00404	1.02822	1.00847	1.02974	1.01088	0.946919	0.994904	1.01042	1.04612		0.972924	0.998484	1.01785	0.991375	0.982305	1.01771	0.971898	1.02688	0.99108	1.0186	1.02875	1.00649	1.02083	0.990277		1.02448	0.948737	0.996762	0.970265	1.00306	1.00277	1.00201	1.01067	1.01579	0.97837	1.03591	1.01203		0.99387	1.00563	0.988263	1.01556	1.02693	1.02125	0.934548	1.04129	0.998925	0.999777
25.367		1.00778	1.03579	0.989246	1.02713	1.01106	0.94884	0.979474	1.00804	1.04942		0.963455	1.00079	1.00697	0.989247	0.975272	1.01052	0.977906	1.02531	0.999442	0.989949	1.01591	0.998514	1.01913	0.997675		1.03448	0.951825	1.00686	1.00267	0.997466	1.01025	1.00608	1.02061	1.00476	0.983842	1.03591	1.00268		0.988838	0.987444	0.98903	1.01379	1.03002	1.03178	0.959394	1.03656	1.00784	0.994096
25.4	0.986804	1.00267	1.02778	0.987118	1.02929		0.955399	0.970545	1.02765	1.03659		0.971724	0.999441	1.00348	0.991307	0.969189	1.01891	0.992991	1.01776	0.995384	0.994269	1.01198	1.00763	1.02309	0.983825		1.02406	0.95619	1.01188	0.985641	0.998455	0.99933	1.01591	1.01921	1.00717	0.992908	1.03011	1.0079		0.978445	0.993218	0.987721	1.01942	1.03326	1.02571	0.934222	1.03696	1.01867	0.978432
25.433	1.00343	1.00771	1.01995	0.97835	1.01609	0.992596	0.942281	0.971891	1.02884	1.0399		0.943069	1.00023	0.996978	0.98846	0.980015	1.01988	0.982275	1.02729	0.998181	1.00206	1.01893	1.00295	1.02495	1.00035			0.95672	1.00014	1.00157	1.01196	0.994043	1.01108	1.02046	1.00849	0.987047	1.02835	1.00455		0.978445	0.992835	0.982548	1.01709	1.03364		0.946251	1.02791	1.01482	0.974701
25.467	0.991215	0.995636	1.02625	0.970205	1.03145	1.00984	0.944817	0.97768	1.02478	1.04411		0.944942	0.997924	0.996978	0.978348	0.971478	1.01189	0.970159	1.01776	0.989399	0.989178	1.04576	0.99868	1.02457	0.990669		1.02118	0.956875	1.0133	0.999293	1.01254	1.00437	1.00271	1.02421	1.0018	1.00307	1.03238	0.988355		0.986123		0.986636	1.00992	1.02362	1.02652	0.939762	1.03027	1.01425	0.983877
25.5	0.997454	1.00971	1.01715	0.970205	1.01431	0.992774	0.941665	0.963782	1.0226	1.04365		0.916111	1.00924	1.00483	0.983879	0.96137	1.01835	0.979716	1.00946	0.98492	0.987739	1.00314	0.99828	1.03094	1.0068			0.972374	0.999765	0.99796	1.0062	0.995642	1.00939	1.01479	1.00631	1.0101	1.03761	0.992323		0.986918	0.998993	0.988488	1.00759	1.02069	1.01518	0.940155	1.01943	1.01675	0.990532
25.533	1.00012	1.00377	1.02561	0.974278	1.02795	1.00277	0.945868	0.967481	1.03261	1.03193		0.934024	0.99522	0.995072	0.982306	0.980868	1.04337	0.979136	1.01027	0.975718	0.98307	1.03038	0.994174	1.01462	1.00514		1.0222	0.944217	1.00897	0.992305	0.986924	0.99825	1.00901	0.985651	1.01229	0.990092	1.03101	0.987807		0.961429	1.0077	0.981239	1.01169	1.02031	1.01106	0.939992	1.01413	1.01482	0.990699
25.567	1.00472	0.992078	1.02778	0.964005	1.0004	0.997773	0.943512	0.982724	1.01706	1.03083		0.935897	0.996176	1.00555	0.978348	0.972494	1.0278	0.959274	0.998364	0.983312	0.96569	1.04559	0.999579	1.02775	1.00318		1.02118	0.95092	1.00193	0.998189	0.982967	1.00068	1.01992	1.01281	1.01042	0.992519	1.02168	0.997		0.95663	0.990985	0.988488	1.01636	1.00668	1.00797	0.933109	1.0023	1.01096	0.989961
25.6	0.991672	0.998207	1.02192	0.98066	0.993929	0.995274	0.942896	0.959635	1.01202	1.02066		0.934449	0.996176	0.988334	0.978348	0.978808	1.02473	0.964462	0.997955	0.981631	0.964251	1.03946	0.996911	1.02006	1.00585		1.01381	0.960711	1.00859	1.00862	0.952741	0.995988	1.01139	0.98367	1.01135	0.991031	1.02321	0.992644		0.943522	1.00477	0.992734	1.01676	1.01392	1.01575	0.941499	1.00075	1.0092	0.996213
25.633	0.982771	0.993175	1.0195	0.971269	0.986306	0.993203	0.936772	0.963782	1.00796	1.02222		0.926429	0.993471	0.983338	0.975664	0.9845	1.02343	0.960503	0.987032	0.979602	0.96713	1.04993	0.980956	1.02286	1.00814		0.982964	0.945276	1.00574	0.997247	0.965091	0.983052	1.01747	0.998604	1.00273	0.979309	1.03214	0.980805		0.940643	0.988752	0.988104	1.01676	1.00465	0.998748	0.943794	1.00369	0.997397	0.994667
25.667	0.998746	0.972252	0.999339	0.97446	0.977865	0.992952	0.946483	0.964865	1.00053	0.996568		0.956884	1.00495	0.987939	0.982144	0.993659	1.01875	0.939411	0.998942	0.986703	0.980859	1.05132	0.984095	1.02099	1.01042		0.991526	0.960181	1.00971	0.983433	0.966081	0.990946	1.01524	0.971753	1.02541	0.95946	1.02401	0.989063		0.955903	0.998068	0.99034	1.01539	1.00556	1.00069	0.934059	0.996594	1.00438	0.990936
25.7	0.98745	0.986781	1.00564	0.969765	0.974631	0.987346	0.9492	0.962699	0.989544			0.974797	0.998812	0.99254	0.981751	0.990814	1.02109	0.949957	0.976518	0.976312	0.960425	1.02882	0.996745	1.01314	1.00318		1.00585	0.954382	1.01352	0.992696	0.953391	0.989102	1.01693	0.978885	1.01656	0.956483	1.0545	0.991708		0.956301	1.00068	0.979929	1.01812	1.0039	0.997942	0.935403	1.00369	1.00614	0.979574
25.733	0.990569	0.987235	0.995911	0.975965	0.966376	0.998809	0.938003	0.957019	0.993112	1.01205		0.973772	0.995384	0.994609	0.980802	0.980936	1.00979	0.956305	0.991387	0.973022	0.975172	1.02171	1.00239	1.01539	1.00429		1.00788	0.952729	1.0121	1.00014	0.957757	0.990111	1.02154	0.984768	1.00087	0.971182	1.05073	0.993967		0.956136	0.992135	0.976384	1.00919	0.988307	1.01179	0.937304	0.995615	1.00903	0.989794
25.767	0.985701	0.983678	1.00851	0.971892	0.966376	0.986739	0.951302	0.964865	0.994301	1.00032		0.954659	0.996736	0.99691	0.975664	0.985515	1.01213	0.94245		0.985095	0.975172	1.03397	0.989569	1.01143	0.996338		0.995	0.96146	1.01897	0.993153	0.949773	0.98625	1.021		0.997846		1.0587	0.991869		0.954614	1.00253	0.976927	1.00646		0.999248	0.930977	1.00801	0.997231	0.979407
25.8	0.986804	0.936721	0.996992	0.975965	0.944736	0.991739	0.952788	0.958103	0.979742	0.9842		0.943142	0.997692	0.998816	0.99471	0.991925	1.00067	0.945829	0.994347	0.970819	0.96966	0.999279		1.01858	0.993828		0.991526	0.94091	1.03214	0.987269	0.959905	0.985659	1.01655	0.984768	0.999164	0.982514	1.05073	0.999739		0.965638	0.993667	0.977853	1.00589	0.992455	1.00921	0.923931	1.00328		0.969424
25.833	0.984598		1.00482	0.96551	0.95102	0.991132	0.949635	0.977942	0.975189	0.981544		0.9318	0.997856	0.996679	0.99471	0.990814	0.994052	0.952417	0.985467	0.982225	0.978648	1.02079	0.985297	1.02122	0.989657		0.990509	0.943997	1.03632	0.98766	0.946975	0.984651	1.02991	1.00235	0.992957	0.982353	1.02661	1.01477		0.963718	0.990734	0.991424	1.01016	0.99261	1.00961	0.926225	0.988115	0.992177	0.976316
25.867	0.989467		1.00023	0.980037	0.937374	0.98949	0.94141			0.9842		0.936746	0.999605	0.999374	0.98499	0.984892	0.970091	0.935933	0.988836	0.986949	0.978052	1.02455	0.993841	1.01842	0.982975		0.997283	0.931055		0.989707	0.952741	0.981799	1.03176		0.992411	0.996114	1.04174	0.995998		0.955245	0.988501	0.977853	0.993264	1.00113	0.991234		0.999127	1.00341	0.987845
25.9	0.982392	0.952081	1.01544	0.969141	0.96422	0.983633	0.94902	0.953583	0.97806	0.980444		0.932224	0.993471	0.983107	0.98499	0.988361	0.969925	0.945079	0.984481	1.01525	0.97907	1.03282	0.98256	1.01111	0.956774		0.998126	0.937604	1.03214	0.983823	0.969218	0.979364	1.03153	0.9855	0.995594	0.988053	1.02991	0.997094		0.955642	0.991341	0.987337	1.00606	0.983345	0.990831	0.920849	0.994971	1.01385	0.98435
25.933	0.980376	0.975089	0.990508	0.978533	0.939977	0.983455	0.9421	0.962962	0.992127	0.975132		0.927277	1.00597	0.988497	0.98823	0.993659	0.982923	0.930985	0.999759	0.996326	0.982371	1.04092	0.993441	1.01259	0.999497		1.00651	0.944682	1.01897	0.980995	0.959665	0.985659	1.01801	0.981599	0.989387	0.984848	1.01148	0.999579		0.955642	0.982409	0.983792	1.00799	1.00075	0.993984	0.914753	0.984365		0.97477
25.967	0.980376	0.973537	0.986818	0.966573	0.926963	0.992596	0.945072	0.947718	0.992619	0.979988		0.941693	0.997296	0.984291	0.996608	0.991599	0.994052	0.938972	0.991218	0.993283	0.980932	1.04329	0.983127	1.02309	0.989819		1.00507	0.947239	1.00469	0.974883	0.960245	0.994145	1.03169	0.997202	0.986203	0.991486	1.02581			0.959879	0.998741	0.978938	0.998261	0.990581	0.997707	0.923144	0.993992	0.986159	0.983779
26	0.976154	0.965591	0.991326	0.981101	0.96117	0.978634	0.945943	0.949622	0.972811	0.974032		0.963704	0.998484	0.986197	0.984435	0.981721	0.988737	0.936583	0.985298	0.986949	0.972118	1.0356	0.977486	1.02254	0.988482		0.992616	0.961241	1.01337	0.949921	0.964442	0.97752	1.01947	0.984616	0.989387	0.984137	1.00738	1.00316		0.950843	0.987576	0.986795	1.00309	0.987119	0.995526	0.95156	0.992439	1.00182	0.981829
26.033	0.980565	0.960293	0.978991	0.975524	0.949049	0.979492	0.938588	0.956571	0.960138	0.973576		0.939219	1.00749	0.992145	0.979853	0.964581	0.999464	0.948288	0.996799	0.995906	0.984582	1.04901	0.969343	1.01803	0.99588		1.00855	0.943623	1.01442	0.979043	0.955878	0.983816	1.01187	0.980349	0.981154	0.991097	1.00312	1.00277		0.957562	0.982026	0.98194	0.999393	1.00113	0.990261	0.910558	0.980041	0.98536	0.979309
26.067	0.981022	0.974822	0.999153	0.963565	0.948864	0.993632	0.949965	0.945289	0.953904	0.971376		0.945015	0.999605	0.997699	0.979853	0.97809	0.982923	0.953646	0.98768	0.988138	0.984757	1.0293	0.970311	1.00661	0.989036		1.00202	0.954163	1.01389	0.953139	0.949533	0.979364	1.01241	1.00875	0.985657	0.991647	1.00738	0.997708		0.955642	0.974085	0.978395	1.00156	1.00565	0.983955	0.937073	0.993992	0.99058	0.975007
26.1	0.985433	0.973083	0.980257	0.96206	0.975339	0.984062	0.944276	0.933109	0.973508	0.974676		0.947064	0.996504	0.992309	0.981195	0.983618	1.00301	0.94467	0.991458	0.989573	0.982895	1.04844	0.972647	1.02743	0.999268			0.941814	0.992951	0.969066	0.946806	0.98079	0.998505	0.984098	0.974174	1.00314	0.997089	1.00013		0.950843	0.982026	0.97731	0.988764	0.98509	0.990595	0.920849	0.989668	0.987688	0.975007
26.133	0.99829	0.974446	0.991141	0.942837	0.967977	0.996916	0.936486	0.952051	0.974204	0.976688		0.954732	1.00128	0.992309	0.982862	0.980773	0.995588	0.950028	0.99367	0.993037	0.97798	1.03878	0.981191	1.02293	0.992653		0.994651	0.94618	1.01554	0.980605	0.95455	0.995571	1.00519	0.985866	0.976812	0.992197	0.972466	0.990707		0.952201	0.97386	0.982324	0.99423	0.995479	0.981607	0.914359	0.978656	0.997163	0.977193
26.167	1.00297	0.983035	0.983576	0.960373	0.969502	0.988632	0.933515	0.942936	0.967562	0.976688		0.960454	1.00066	0.99921	0.971245	0.972399	0.98259	0.94491	0.988328	0.984674	0.978227	1.03306	0.967974	1.01585	0.988644		0.991352	0.945431	0.997815	0.961298	0.943598	0.992301	1.00649	0.987633	0.991026	0.989542	0.978097	0.988836		0.951803	0.974243	0.982324	0.998495	0.98403	0.982747	0.917211	0.995209	0.992342	0.977596
26.2	0.989923	0.980652	0.987266	0.962759	0.961693	0.978456	0.945943	0.963071	0.977856	0.9853		0.966001	0.990138	1.00056	0.985709	0.978483	0.994218	0.946719	0.976827	0.9965	0.971871	1.01768	0.967573	1.01585	0.985027		0.9983	0.938353	1.00686	0.965458	0.95414	0.974077	1.01986	1.00074	0.971536	0.999708	0.974799	0.998804		0.95508	1.00636	0.99235	0.991897	0.975515	0.982344	0.913572	0.984771	0.98576	0.986201
26.233	0.988174	0.975809	0.989427	0.977286	0.954778	0.981385	0.941305	0.948647	0.966169	0.9875		0.913711	0.999769	0.997305	0.996215	0.976423	0.984293	0.951087	0.995883	1.00343	0.978227	1.02242	0.974583	1.01189	0.974403		0.989912	0.938353	1.00723	0.965068	0.952402	0.984406	0.996502	0.985134	0.975267	0.995725	0.972301	0.998804		0.965871	1.00266	0.983792	0.998896	0.990207	0.97594	0.916423	0.981021	0.992907	0.98247
26.267	0.97045	0.976264	1.00463	0.978168	0.961508	0.97285	0.929057	0.948385	0.962601	0.981088		0.902969	1.00343	0.999605	0.991307	0.977927	0.976306	0.956686	0.994318	0.9845	0.994588	1.03174	0.969744	1.01414	0.982192		0.974576	0.937449	0.996236	0.954471	0.950183	0.971643	1.00926	1.00449	0.971696	0.985948	0.969002	0.963836		0.977457	0.985726	0.982866	0.999696	0.970708	0.977315	0.917767	0.993824	0.984796	0.984419
26.3	0.996351	0.97407	1.01004	0.978791	0.961062		0.929057	0.963628	0.971418	0.9897		0.905867	1.0027	1.00897	0.988786	0.988984	0.976874	0.956686	0.994488	0.989399	0.976191	1.01243	0.974817	1.01919	0.985418		0.97398	0.943997	1.00491	0.95847	0.936914	0.972651	0.989661	0.998452	0.985364	0.990092	0.96667	0.970705		0.973782	1.00474	0.984334	1.00066	0.974016	0.969703	0.922356	0.978656	0.9954	0.991882
26.333	0.979541	0.980919	1.00508	0.969217	0.972736	0.973279	0.924164	0.951449	0.978842	0.979988		0.904842	1.00175	1.00286	0.983811	0.973578	0.973566	0.948529	1.00878	0.980022	0.978823	1.00433	0.962167	1.0021	0.989589		0.971945	0.946774	0.987408	0.975502	0.955779	0.987849	1.00057	0.989552	0.976133	0.989314	0.971335	0.97164		0.964746	1.00136	0.985803	1.00669	0.972362	0.976343	0.918555	0.980041	0.980871	0.97289
26.367	0.98266	0.972063	1.00266	0.975417	0.959984	0.988455	0.933875	0.949731	0.957556	0.991256		0.901593	1.00788	0.991751	0.978674	0.972792	0.97477	0.939792	1.00616	0.990413	0.973907	0.997216	0.945646	1.02029	0.982746		0.950678	0.947678	0.993015	0.972998	0.951003	0.983153	0.993892	0.992935	0.977452	0.979148	0.967636			0.970903	1.00436		0.992698	0.972517	0.95277	0.923537	0.973353	1.00198	0.988318
26.4	0.990648	0.978004	1.00463	0.972666	0.967977	0.995703	0.930108	0.952795	0.947057	0.985944		0.890324	1.01042	1.00302	0.979853	0.964025	0.969288	0.956686	0.996221	1.00021	0.975594		0.964103	1.00793	0.978574		0.961943	0.960181	0.974242	0.975597	0.960315	0.981136	0.991124	0.99772	0.966195	0.978209	0.969968			0.972658		0.990115	1.0034	0.979818	0.96823	0.904855	0.966665	0.996929	0.988889
26.433	0.993121	0.970057	1.00158	0.978426	0.964743	0.993809	0.935181	0.958923	0.962601	0.981544		0.886226	1.00215	0.990961	0.979297	0.98702	0.971628	0.945729	0.994995	0.996398	0.97763	1.0188	0.961766	0.993476	0.991803		0.970331	0.965077	0.973716	0.968609	0.942849	0.976858	0.998729	0.989552	0.971404	0.970471				0.971136	0.990575	0.984943	1.0071	0.985839	0.956895	0.893614	0.971394	0.981036	0.983444
26.467	0.988899	0.993442	1.00266	0.975858	0.982516	0.980705	0.942791	0.966955	0.975971	0.999412		0.878382	1.00772	0.995168	0.992879	0.972792	0.985996	0.936753	0.98768	0.973761	0.968221	1.01995	0.962734	1.00716	0.993855		0.962365	0.962364	0.977681	0.959803	0.956768	0.980892	0.995579	0.997934	0.972496	0.986886	0.956774			0.968092	0.979793	0.982006	1.00846	0.999097	0.947672	0.892663	0.965853	0.990745	0.975814
26.5	0.990915	0.986326	0.986185	0.981176	0.965189	0.992774	0.968697	0.973083	0.95973	0.9842		0.881279	1.00772	0.998026	0.9864	0.977142	0.97196	0.934773	1.00075	0.978239	0.976191	1.04048	0.967974	1.00474	0.976064		0.949485	0.967479	0.976565	0.967733	0.940461	0.994664	0.997806	0.987116	0.969859	0.973676	0.96667	0.975221		0.967296	0.987959	0.99481	1.00999	0.990892	0.924197	0.896071	0.971562	0.989148	0.983041
26.533	1.0013	0.988521	1.00184	0.98455	0.975601	0.96967	0.977538	0.943865	0.962601	0.991067		0.879831	1.00812	1.00572	0.985058	0.970502	0.982286	0.964023	0.981112	0.973167	0.984582	1.03631	0.970477	1.00716	0.986134		0.970157	0.973498	0.966094	0.977844	0.957107	0.991048	1.00541	0.983215	0.965743	0.985559	0.962971	0.969515		0.970011	0.98126	0.98571	1.00436	0.980503	0.930434	0.904855	0.967238	0.97382	0.98247
26.567	0.981179	0.983035	0.99923	0.986936	0.950465		0.970799	0.915545	0.96379	0.984011		0.895871	1.00294	0.996679	0.985614	0.956993	0.980348	0.9431	0.980126	0.971906	0.972715	1.05153	0.980389	1.00117	1.00376		0.98981	0.971315	0.982545	0.972028	0.957687	0.995499	0.995961	0.977698	0.965196	0.983292	0.961039	0.982062		0.966734	0.993667	0.983858	1.00476	0.991952	0.929795	0.887124	0.980447	0.971892	0.988958
26.6	0.980076	0.986969	0.990955	0.971345	0.971027	0.968206	0.968877	0.94775	0.952306	0.980899		0.884353	0.996804	0.993656	0.980869	0.996572	0.986799	0.947299	0.990471	0.978905	0.972715	1.03001	0.990703	0.993476	1.00171		0.981001	0.959342	0.984495	0.984671	0.979929	0.983326	1.01063	0.995132	0.974201	0.990253	0.948811	0.973804		0.970011	0.967637	0.996887	1.00243	0.983591	0.950117	0.892826	0.974738	0.993004	0.988958
26.633	0.98559	0.979932	0.986818	0.988881	0.978574	0.945531		0.919244	0.971706	0.997935		0.888026		0.992867	0.984339	0.972236	0.985428	0.962383	1.00221	0.966065		1.02706	0.981924	0.996502	0.996042		0.99532	0.960775	0.977835	0.98012	0.995177	0.984162	1.0021	0.982179	0.986777	0.980637	0.956774	0.964384		0.964252	0.985436	0.995419	0.995831	0.982532	0.929795	0.912065	0.982	0.98313	0.988958
26.667	0.979619	0.968506	0.980967	0.981435	0.980545	0.971312	0.938619	0.947115	0.974577	0.993912		0.900144	1.00772	0.99382	0.985288	0.988591	0.988169	0.973919	0.991119	0.968514	0.983564	1.0377	0.979588	0.991063	0.996042		0.984054	0.967324	0.989576	0.946998	0.949873	0.988786	1.00026	0.985348		0.982353	0.972867	0.966803		0.976565	0.978419	0.987786	0.989399	0.97598	0.937407	0.906593	0.974906	1.00288	0.977833
26.7	0.993767	0.962111	0.975116	0.985066	0.981808	0.966564	0.941155	0.925821		0.999679		0.880607	1.00389	0.99382	0.98663	0.987643	0.999229	0.964192	0.980435	0.969529	0.981703	1.00948	0.976449	0.993702	0.993369		0.978123	0.963488	0.99571	0.941896	0.957207	0.99063	0.999018	0.988731	0.987003	0.986886	0.971335	0.975287		0.969051	0.983268	0.98686	1.00959	0.96868	0.961619	0.915771	0.971562	0.992839	0.974338
26.733	0.988899	0.980386	0.9816	0.979307	0.965821	0.974241	0.938438	0.905795	0.962397	1.00472		0.886153	0.984305	0.990567	0.98987	0.978483	1.02359	0.96914	0.984212	0.969529		1.01954	0.979588	0.987716	0.997932		0.963804	0.950391	0.993015	0.954996	0.950452	0.989031	0.996027	0.992329		0.983292		0.972094		0.965377	0.974561	0.986477	1.00493	0.976885	0.941297	0.908331	0.969365	0.996695	0.982135
26.767	0.990915	0.966045	0.973588	0.971162	0.970133	0.992523	0.938258	0.896417	0.973388	0.989056		0.90032	0.971014	0.998026	0.976748	0.990488	0.992613	0.978867	0.992754	0.970543	0.988233	1.00416	0.989335	0.985077	0.996825		0.963383	0.946929	1.00491	0.960489	0.956387	0.990039	0.989345	0.984161	0.997487	0.981253	0.969568	0.964545		0.960742	0.970861	0.980154	0.991165	0.973577	0.937977	0.891713	0.977439	1.00191	0.995446
26.8	0.9978	0.985684	0.978991	0.963716	0.964296	0.988988	0.932389	0.91816		0.998768		0.897247	0.992911	0.984223	0.976192	0.971451		0.963133	0.993332	0.958123	0.970853	1.00375	0.967172	0.997275	1.0095		0.970157	0.944746	0.987626	0.952007	0.947414		0.993417		0.991892	0.975781	0.968036	0.967738		0.956903	0.980877	0.986477	0.995997	0.981188	0.946797	0.895514	0.99041	0.991641	1.00738
26.833	0.977413	0.984587	0.984657	0.971162	0.965636	0.970277	0.925215	0.913378	0.97913	0.992356		0.918233	0.977543	0.990335	0.975799	0.985353	0.992613	0.964292	0.994488	0.974601	0.980263	1.00555	0.986666	0.999689	1.0184		0.968717	0.945276	0.993233	0.959775	0.958196	1.00364	1.00233	0.993516	0.994916	0.988831		0.972254		0.967694	0.979186	0.990181	0.975802	0.981188	0.929795	0.894727	0.983148	1.00713	0.991951
26.867	0.980989	0.986326	0.988794	0.968594	0.968239	0.981489	0.932569	0.918051	0.960223	0.9864		0.925829	0.988294	0.99073	0.989314	0.975475	0.989941	0.975248	0.984551	0.983384	0.983739	1.01602	0.991505	0.989196	1.00132		0.973631	0.931119	0.992861	0.96088	0.952431	0.9939	0.990649	0.995498	0.999032	0.979215	0.959907	0.967738		0.965212	0.98126	0.990022	0.986665	0.964687	0.929058	0.898529	0.970919	0.992205	0.990976
26.9	0.994681	0.980841	0.990955	0.96595	0.956303	0.980882	0.936157	0.896757	0.976259	0.996112		0.90894	0.98813	0.993589	0.98964	0.979269	0.99228	0.963302	0.989484	0.977471	0.981877	1.01365	0.989002	0.98585	1.00455		0.954646	0.934581	0.986573	0.970924	0.94008	0.999187	0.995486	1.00382	0.995462	0.974293	0.959507	0.966963		0.968092	0.973795	0.991331	0.997929	0.980284	0.933754	0.899085	0.978587	0.999188	0.995279
26.933	0.998257	0.97664	0.980596	0.962318	0.974076	0.976312	0.934671	0.899821	0.965676	0.998312		0.906891	0.987338	0.99819	0.990196	0.966871	0.995187	0.978867	0.976179	0.976456	0.979245	1.01897	0.98997	0.967279	1.00093		0.959312	0.933832	0.993079	0.966858	0.938102	0.995153	1.00271	0.996685	0.993597	0.977887	0.962639	0.966415		0.954984	0.973253	0.981146	0.969769	0.982842	0.931976	0.892202	0.988451	0.999022	0.999177
26.967	0.978973	0.99189	0.980596	0.950982	0.949126	0.974847	0.933981	0.888276	0.975274	1.00097		0.90834	0.991955	1.0066	1.00086	0.967101	1.00261	0.986274	0.985538	0.964804	1.00154	1.00792	0.987468	0.986783	1.00321		0.959734	0.945431	0.988588	0.976902	0.943288	0.98844	1.00271	0.998818	0.994143	0.982031	0.959341	0.967738		0.958823	0.977719	0.990088	0.966802	0.980658	0.931809	0.880336	0.979398	1.00673	0.992522
27	0.99936	0.970246	0.989952	0.949918	0.947601	0.98881	0.926371	0.898289	0.986962	0.991256		0.905867	0.989646	0.977485	1.00584	0.973185	0.982521	0.960474	0.995474	0.971906	0.993992	1.01897	0.992141	0.991836	0.992424		0.960751	0.954318	0.985521	0.957043	0.934965	0.989031	0.996791	1.00449	1.0009	0.976948	0.959741	0.973804		0.953791	0.973636	1.01314	0.962536	0.975916	0.942908	0.885712	0.980951	1.00577	0.993329
27.033	0.990915	0.984587	0.994274	0.971968	0.938083	0.973206	0.945178	0.903071	0.98319	0.990611		0.917633	0.992119	1.00486	1.00829	0.968212	0.987602	0.959894	0.982169	0.971834	0.99501	1.02625	0.983763	0.98437	1.00077		0.973209	0.95198	0.99816	0.943781	0.943288	0.994318	1.00179	0.998604	0.989481	0.985237	0.941882	0.989771		0.947237	0.973094	0.996794	0.957305	0.970799	0.93724	0.879942	0.982336	1.00304	0.982372
27.067	0.981635	0.991436	0.994537	0.962576	0.948679	0.977525	0.960578	0.911365	0.977244	0.989511		0.90894	0.991395	0.993752	0.999915	0.962358	1.00431	0.969041		0.961791	0.982124	1.02371	0.989237	0.993702	1.00572		0.953381	0.939257	1.00414	0.954929	0.928789	0.995326	1.014	0.999853	0.989481	0.981481	0.951612	0.981353		0.968586	0.962854	0.980603	0.968569	0.98805	0.948172	0.873289	0.981931	1.01524	0.996657
27.1	1.00506	0.981107	0.983653	0.975341	0.958012	0.979596	0.945613	0.926872	0.981593	0.987956		0.907491	0.991395	1.00391	1.00165	0.978483	1.01423	0.951568	0.986355	0.989501		1.03238	0.984398	0.997435	1.00038		0.9677	0.946555	0.994041	0.966468	0.935544	0.989275	1.00869	0.980135	0.993823	0.989608	0.960141	0.987901		0.952365	0.958388	0.994016	0.96567	0.97916	0.930767	0.874633	0.976054	0.99277	0.984321
27.133	0.992854	0.982847	0.995803	0.964263	0.952545	0.982095	0.942896	0.902776	0.992584	0.992356		0.911413	0.992911	0.996842	0.986956	0.991274	0.999464	0.977608	0.992684	0.966167	0.982721	1.017	0.978757	0.976998	0.993207		0.977105	0.94565	0.995838	0.994486	0.92739	0.98625	0.993865	1.0025	0.995142	0.987503	0.95008	0.974031		0.963718	0.961163	0.985841	0.984664	0.981124	0.924697	0.886663	0.983316	0.996062	0.990573
27.167	0.977413	0.998285	0.986709	0.971086	0.962956	1.02012	0.945433		0.973965	0.987044		0.921482	1.00175	1.00565	0.987349	0.971843	1.00882	0.99812	0.99959	0.9725	0.994588	1.01504	0.979158	0.997049	0.988024		0.970578	0.950546	0.984251	0.974627	0.935374	0.992963	0.99571	0.997505	0.987842	0.989608	0.965606	0.982128		0.955807	0.966712		0.977168	0.984587	0.936435	0.88745	0.977033	1.00128	0.993497
27.2	0.974372	0.997188	0.98302	0.965768	0.959275	1.01444	0.959782	0.921192	0.979707	0.997668		0.931975	0.997296	0.994936	1.0026	0.964974	1.00551	0.970101	0.982408	0.97579	0.985775	1.00833	0.983665	0.978091	0.974012		0.991845	0.959432	0.996364	0.972351	0.943288	0.989347	0.985179	0.998907	0.995914	0.980931	0.955711	0.977064		0.957727	0.967637	0.985682	0.986099	0.990763	0.934254	0.90715	0.978013	0.988914	0.993162
27.233	0.990269	1.00165	0.991032	0.979672	0.955148	0.991163	0.950941	0.93184	0.979996	0.991711		0.907067	0.994031	0.995726	1.00276	0.975082	1.00745	0.969281	0.985199	0.984572	0.995185	1.03459	0.976089	0.988037	0.975348		0.966086	0.966356	0.988806	0.955319	0.938512	0.991782	1.00316	0.999425	0.993823	0.98867	0.961742	0.974806		0.953655	0.957014	0.988526	0.988101	0.98677	0.935393	0.913476	0.987066	0.999188	0.995515
27.267		0.977361	0.986262	0.96709	0.966006	0.998306	0.95663	0.922013	0.957725	0.992812		0.905018	0.992119	0.998816	0.997231	0.986531		0.951158	0.985777	0.986427	0.982474	1.01822		0.997049	0.986917		0.964226	0.969972	1.00092	0.942676	0.956967	0.998668	1.00554	0.994274	0.978677	0.980931	0.971472	0.976129		0.957891	0.967254	0.984439	0.984401	0.983682	0.926975	0.921867	0.97173	0.979838	0.989667
27.3	1.00818	0.966123	0.989318	0.984808	0.966006	0.990556	0.956269	0.922013	0.965845	0.979988		0.907491	1.00215	1.01715	1.00103	0.986857	1.00979	0.94457	0.989724	0.980688	0.97798	1.0062	0.978826	0.98485	1.01563		0.983458	0.971251	0.977809	0.949893	0.955158	0.997659	0.99202	0.986258	0.988614	0.986953	0.972838	0.975354		0.957494	0.960621	0.996	0.982234	0.985646	0.923253	0.914984	0.990242	0.999022	0.999247
27.333	0.975286	0.988599	0.997779	0.980371		0.982451	0.968082	0.928327	0.959407	0.995012		0.912013	0.992911	0.981923	0.987674	0.990881	1.02439	0.954127	1.00599	0.986601	0.996377	0.997117	0.973586	0.991063	0.987537		0.988618	0.96673	1.00272	0.959708	0.955158	0.998668	0.987565	0.987508	0.988388	0.992814	0.954579	0.975193		0.953257	0.964545	0.999545	0.986099	0.973138	0.929657	0.927733	0.976865	0.98722	0.975716
27.367	0.982817	0.98841	0.988871	0.974794	0.972475	0.981237	0.956704	0.93834	0.947923	1.00142		0.926429	0.983349	0.982876	0.990128	0.994512	1.00979	0.967811	1.00327	0.981877	0.979419	1.0129	0.972619	0.990676	1.00761		0.984795	0.974183	0.99621	0.95272	0.962902	1.00514	1.01184	0.982357	0.984658	0.992653	0.954013	0.967323		0.953422	0.972935	0.98428	0.9832	0.983308	0.925364	0.917441	0.984771	0.995565	0.97101
27.4	0.979051	0.998096	0.98302	0.988881	0.961878	0.979344	0.958626	0.922648	0.972776	0.995467		0.933849	0.97395	0.979622	0.996608	0.990163	0.99091	0.963273	0.994318	0.984326	0.988407	1.02002	0.974955	0.996116	0.997216		0.987673	0.985627	0.995838	0.978397	0.956967	1.00027	0.999559	0.984428	0.98575	1.0057	0.945649	0.979322		0.951269	0.962088	0.9876	0.978535	0.985117	0.944478		0.983959	0.994767	0.983514
27.433	0.986771	0.982925	0.994537	0.976921	0.961878	0.996162	0.956524	0.930865	0.969413	0.992356		0.933	0.978007	0.991519	0.995429	0.985095	1.00277	0.964503	1.00541	0.997761	0.997817	1.0228	0.963673	0.996116	0.984865		0.993182	0.966949	0.993143	0.958375	0.971875	0.999258	0.996949	0.963119	0.970764	0.991942	0.928356	0.980805		0.935844	0.964704		0.989965	0.983837	0.92674		0.974332	1.00231	0.986674
27.467	0.9932	0.98421	0.989318	0.966649	0.971397	0.991591	0.934565	0.932583	0.957232	0.988411		0.919185	0.995848	0.981759	0.976939	0.982575	0.972029	0.964673	1.01075	0.991428	0.984088	1.00488	0.967946	0.982984	0.989981		0.998866	0.966949	0.990448	0.962145	0.973854	1.00169	0.999177	0.96245	0.958961	1.00515	0.938418	0.976676		0.947595	0.974561	0.986674	0.972102	0.984212	0.941797			0.999986	0.988456
27.5	0.992364	0.989508	0.983915	0.968153	0.973814	0.984092	0.942175	0.932506	0.95149	0.993912		0.940595	0.987174	0.986524	0.989898	0.986924	0.988972	0.966482	0.994079	0.99895	0.982474	1.00962	0.971084	0.984077	1.005		0.977424	0.977489	0.982146	0.937573	0.969897	0.987503	0.992877	0.960468	0.959734	1.00117	0.942682	0.983678		0.954149	0.972328		0.977734	0.971704	0.92892		0.974501	1.00713	0.97612
27.533	0.993467	0.973161	0.985891	0.961072	0.96924	0.9797	0.942355	0.917077	0.962974	0.988411		0.917136	0.979852	0.996447	0.989505	0.993238	0.977441	0.964842	0.999421	0.994717	0.981034	1.02026	0.958834	0.98485	0.992167		0.971072	0.968603	0.996954	0.955386	0.96635	0.99825	0.996027	0.965101	0.950342	0.999291	0.939384			0.947759	0.978261	0.995934	0.974835	0.980064	0.937741		0.993586	0.994932	0.969464
27.567	0.978405	0.975355	0.988948	0.968518	0.967269	0.992376	0.958806	0.920327	0.963467	0.991711		0.923283	0.988854	0.97042	0.986821	0.993468	0.98349	0.973169	1.01371	0.990833	0.977136	1.00881	0.971485	0.992156	0.993503		0.974546	0.962273	1.0042	0.952168	0.973274	1.00395	0.996949	0.966199	0.971536	0.996086	0.938418	0.975099		0.955108	0.975486	1.00117	0.981033	0.981873	0.938949		0.969029	1.01235	0.969632
27.6	1.00339	0.968772	0.989581	0.959568	0.965113	0.979877	0.950761	0.919506	0.981593	0.987767		0.925932	0.974047	0.990335	0.996703	0.987154	0.993249	0.966002	1.0032	0.9845	0.970184	1.01551	0.977291	0.999689	0.99673		0.946083	0.975151	0.993515	0.969039	0.96553	0.981035	0.989503	0.971475	0.960666	0.984592	0.953944	0.98758		0.946402	0.977719	1.00341	0.972502	0.980969	0.935462		0.967476	0.99726	0.983917
27.633	0.989702	0.98175	0.985443	0.965145	0.960354	0.996946	0.951812	0.929968	0.979011	0.998123		0.914238	0.965605	0.988593	0.990779	0.98771	0.988169	0.97078	1.00575	0.99937	0.98307	1.00464	0.972619	0.997822	0.990506		0.947697	0.965735	0.973844	0.951778	0.968908	0.99279	0.990267	0.978456	0.961985	0.993269	0.950811	0.969581		0.951763	0.974561	0.987217	0.976768	0.976601	0.9306		0.974164	0.9824	0.974101
27.667	0.990348	0.990793	0.983467	0.958504	0.967716	0.989625	0.933079	0.950442	0.984548	1.00985		0.923707	0.980972	0.981923	0.98636	0.989282	0.997693	0.984295	0.997208	0.997761	0.967974	0.998338	0.986803	1.00683	0.987834		0.955489	0.961744	0.996582	0.958214	0.960344	1.00068	0.992877	0.980438	0.970444	0.986309	0.946947	0.997		0.958715	0.966554	0.979425	0.962039	0.975322	0.954243		0.9793	0.98649	0.974909
27.7	0.979965	0.978913	0.984996	0.962136	0.964481	1.00212	0.932644	0.936096	0.975528			0.91876	0.97309	0.987245	0.996636	0.981856	0.997526	0.968971	0.993022	0.987964	0.980016	1.00677	0.97472	1.00683	0.998849		0.959384	0.958657	0.984841	0.974694	0.959765	1.00841	0.995104	0.993971	0.966168	0.997091	0.948479	0.99716		0.93945	0.977336	0.987217	0.978135	0.977506	0.924933		0.978726	0.989216	0.969395
27.733	0.989512	0.984476	0.991294	0.954432	0.973814	1.00195	0.92565		0.976717	1.00609		0.921234	0.966165	0.987477	0.984069	0.995528	1.00672	0.973339	0.99663	1.00301	0.980612	1.01446	0.983098	1.00046	0.991614		0.976756	0.957908	0.978707	0.962374		1.00698	1.00433	0.987204	0.973308	0.97106	0.949611	0.988581		0.935776	0.971403	1.00695	0.971136	1.00221	0.948742		0.975787	0.975651	0.958034
27.767	0.999706	0.991325	0.986709	0.965768	0.96385	1.0053	0.924599	0.952423	0.989594	0.997935		0.925932	0.965769	0.98018	0.985249	0.990393	0.982355	0.964602	0.996052	0.995486	0.98595	1.00816	0.969079	0.998209	0.993503		0.960402	0.960465	0.991346	0.960489		1.00413	0.992877	0.979769	0.964689	1.00687	0.958941	0.983196		0.949117	0.969553	0.99801	0.975001	0.993477	0.936268		0.978152	0.98536	0.976622
27.8	1.03021	0.984742	0.983915	0.967895	0.95909	0.997804	0.920141	0.950891	0.978602	0.988222		0.925331	0.984633	0.992078	0.994968	0.984079	0.989775	0.965762	0.993501	1.00486	0.98163	1.01128	0.980762	1.00062	0.987213		0.996584	0.964456	1.00234	0.964259		0.999849	0.993259	0.989186	0.956456	0.989903	0.965372	0.981165		0.950474	0.981419	0.989452	0.980233	0.989109			0.972681	0.984162	0.967042
27.833	1.01222	0.989852	0.985443	0.961072	0.947154	1.00366	0.92583	0.943045	0.993654	1.0081		0.932151	0.979456	0.995562	1.00832	0.982737	0.996557	0.973339	0.992923	0.993877	0.990618	1.00931	0.970047	0.98469	0.983825		0.984722	0.969507	0.977283	0.966535		1.00632	0.995486	0.979403	0.949929	0.992008	0.959907	0.980778		0.952229	0.978261	0.999095	0.973869	0.988735	0.92785		0.979132	0.994436	0.958841
27.867	0.997422	0.989209	0.988685	0.958762	0.960169	1.01255	0.916554	0.930154	0.987215	1.00655		0.928229	1.00142	0.995957	0.988095	0.979892	0.982923	0.949688	1.00024	0.996326	0.972817	1.01602	0.977223	1.00008	0.98288		0.994549	0.964986	0.976384	0.953273		0.987676	0.989028	0.985803	0.93401	0.988575	0.965372	0.976649		0.960935	0.977494	0.989069		0.975852	0.93117		0.966566	1.00005	0.969799
27.9	0.980611	0.979711	0.981939	0.964962	0.946261	1.00237	0.915684	0.930603	0.980573	0.986478		0.924307	0.999276	1.01032	0.990386	0.982344	0.984459	0.958835	0.992106	1.00063	0.976293	1.01758	0.977624	0.978318	0.993274		0.982687	0.951204	0.995902	0.955548		0.997832		0.978671	0.936421	1.0125	0.974302	0.968939		0.953984	0.969329	0.98514	0.970736	0.979845	0.920808		0.971701	0.991709	0.974101
27.933		0.974414	0.972846	0.956817	0.965374	1.0028	0.931339	0.936917	0.984837	0.99509		0.921834	0.985425	0.98715	0.975136	0.984309	0.982688	0.97013	0.991697	0.973935	0.96604		0.995113	1.00342	0.998782		0.993531	0.956254	0.990512	0.951778		0.993381	0.985654	0.98824	0.929667	1.0014	0.967539	0.966681		0.955739	0.964096	0.986608	0.965904	0.97894	0.934087		0.967783	0.996529	0.964689
27.967	1.01092	0.972862	0.970051	0.966649	0.960615	1.00548		0.929519	0.979996	0.995734		0.93063	1.00119	0.990403	0.982009	0.977602	0.994786	0.976718	0.99088	0.990239	0.981383	1.01382	0.988504	0.984464	0.983987		0.984301	0.95535	0.973009	0.958766		0.997415	1.00086	0.98824	0.924778	0.99913	0.984197	0.972133		0.951735	0.978195	0.992323	0.969838	0.981124	0.92235		0.965181	0.988018	0.967209
28	0.990158	0.985385	0.980487	0.957258	0.953885	1.00652	0.924599	0.934115	1.0117	0.997557		0.929605	1.00676	0.984849	0.990386	0.987154	0.991076	0.94491	1.00731	0.988384	0.946377	1.01561	0.984467	0.994409	0.989886		0.985318	0.954976	0.987817	0.987041		0.986077	1.0001	0.996041	0.943495	0.97857	0.976068	0.971745		0.951337	0.974495	0.978368	0.974338	0.97894	0.933518		0.962074	1.00118	0.953898
28.033	0.989702		0.981383	0.961072	0.956041	1.01444	0.923729	0.926532	0.9996	1.01387		0.908794	0.997364	0.977784	0.982172	0.978388	0.988737	0.968151	1.00156	0.988804	0.969937	1.01619	0.983665	0.996502	0.984149		0.981422	0.938636	0.96762	0.969685		1.00145	1.00363	0.985589	0.944587	0.999358	0.990794	0.957876		0.951502	0.998292	0.995802	0.960175	0.975697	0.927045		0.963628	1.01611	0.95
28.067	0.985023	0.976154	0.989395	0.966391	0.946969	1.00591	0.944021	0.934378	0.983852	0.997479		0.920736	1.00063	0.976831	0.988881	0.978158	1.00237	0.950268	0.989315	0.991848	0.965618	1.00514	0.983665	0.994089	0.988158		0.979983	0.954446	0.958728	0.976768		0.996824	0.981964	0.989489	0.942722	0.982942	0.987496	0.974391		0.95094	0.988818	0.989479	0.965641	0.973888	0.93117		0.962074	0.996364
28.1	0.9808	0.9841	0.980935	0.968518	0.94563	0.993411	0.944021	0.940058	0.967611	1.00325		0.912717	1.00158	0.989845	0.991403	0.975868	0.988335	0.947469	0.982338	0.988804	0.986721	1.01382	0.992444	0.993702	0.980923		0.978123	0.954976	0.961486	0.972446		0.985904	0.981964	0.999273	0.932465	0.985759	0.978566	0.976101		0.952695	0.996442	0.997112	0.951078	0.986085	0.944852		0.964439	1.00022	0.968824
28.133	0.977492	0.996889	0.958797	0.960373	0.94221	1.01859		0.933109	0.995047	1.00059		0.914165	0.977611	0.994609	0.98983	0.985583	0.994786	0.957845	0.967299	0.976804	0.975871	1.00907	0.977458	1.00124	0.983987		0.982615	0.964392	0.980785	0.95808		0.988756	0.988487	1.00832	0.937127	0.993497	0.987096	0.974778		0.943988	1.00276	0.991556	0.972806	0.984276	0.941768		0.968763	0.996929	0.956655
28.167	0.987039	0.975887	0.987419	0.975782	0.926408	1.01316		0.947006	0.992176	1.00939		0.910067	0.97339	0.996515	0.98453	0.974526	0.974368	0.94491	0.982747	0.991674	0.982648	1.01087	0.983665	1.00481	0.97447		0.976088	0.964392	0.980631	0.969618		0.997832	0.984955	1.00567	0.940697	0.99913	1.00656	0.975166		0.945908	0.994592	0.987852	0.960575	0.986085	0.928086		0.964439	0.99131	0.954706
28.2	0.988599	0.984288	0.988948	0.965327	0.92228	1.00462		0.917865	0.970194	1.00124		0.91459	0.996476	1.00516	1.00302	0.991111	0.984293	0.946889	0.994417	1.00291	0.965865	1.01104	0.975121	0.998209	0.988712		0.975317	0.965671	0.985495	0.957137		0.983469	0.996633	0.993605	0.94147	0.997641	0.993127	0.969875		0.962457	1.00068	1.00066	0.974738	0.994601	0.935295		0.958156	0.996929	0.962336
28.233	1.00275	0.977705	0.975902	0.962136	0.945521	0.998159		0.932846	0.972284	1.00875		0.912965	0.965508	0.992145	1.00776	0.986924	0.989706	0.953236	0.982338	0.984572	0.963407	1.02584	0.971416	0.997662	0.984378		0.98023	0.972219	0.995221	0.947322		0.987086	1.00016	1.00464	0.975785	0.993108	0.987896	0.979068		0.950378	0.996059	0.998328	0.973372	0.995131	0.938213		0.957177	1.00142	0.956488
28.267	0.994302	0.987657	0.971765	0.958762	0.955748	1.00169		0.916968	0.989017	1.00526		0.925932	0.988594	0.988892	0.99978	0.990163	0.990273	0.94368	0.990471	0.990065	0.982823	1.01636	0.979393	0.994089	0.993274		0.975317	0.980951	0.998288	0.946218		1.0043	0.992178	1.00162	0.944174	0.987636	0.995059	0.985454		0.963321	1.00292	1.00296	0.96814	0.98805	0.930364		0.963865	0.9954	0.960554
28.3	0.991907	0.969571	0.982387	0.97373	0.954038	1.00048		0.906692	0.975154	1.0092		0.922858	0.974579	0.994282	0.994249	0.981233	0.978009	0.949618	1.00354	0.981529	0.969937	1.0108	0.963038	1.00497	0.994773		0.982091	0.967479	0.985867	0.953986		1.00068	0.996633	0.999336	0.918317	0.999291	0.989262	0.981165		0.961401	0.986585	0.992005	0.968706	0.982778	0.934087		0.961906	0.994436	0.961932
28.333	0.985936	0.976608	0.95503	0.97993	0.973151	1.01005		0.926904	0.99447	1.00215		0.931302	0.974579	0.999278	0.985479	0.977439	0.969455	0.939651	0.991218	0.990065	0.962564	1.02168	0.982531	0.98437	0.982421		0.977774	0.955816	0.992372	0.942448		0.982634	1.00385	0.996988	0.918317	0.992492	0.983231	0.992229		0.96779	0.98196	0.991622	0.976271	0.985117	0.930934		0.962886	0.993073	0.971512
28.367	0.991907	0.964461	0.938033	0.967348	0.965343	1.00212		0.911474	0.978926	0.998202		0.937874	0.981668	1.00174	0.982632	0.977209	0.967683	0.947398	1.00469	0.997239	0.954769		0.970047	0.999915	0.993274		0.979213	0.961086	1.00142	0.953596		0.988929	0.994564	0.998907	0.917931	0.988536	0.997392	0.979228		0.960839	0.994751	0.9944	0.962508	0.979315	0.933448		0.986127	0.996364	0.970941
28.4	0.991718	0.957158	0.96647	0.972666	0.97252	0.998839		0.906692	0.98635	0.997935		0.927205	0.979196	0.986033	0.984137	0.986369	0.969856	0.953746	0.995982	0.981355	0.949257	1.0045	0.963038	0.987716	1.00106		0.974895	0.966885	0.986983	0.953044		0.982043	0.992336	1.00177	0.926163	0.998152	0.992327	0.999872		0.953723	0.992518	1.00813	0.961542	0.986021	0.930364		0.971939	0.996929	0.969799
28.433	0.998792		0.962966	0.982939	0.956902	0.999875		0.921487	0.991395	0.980066		0.918585	0.977679	1.00253	0.987214	0.990163	0.971559	0.947568	0.998942	0.991326	0.982227	1.01334	0.973185	1.00651	0.991776		0.975913	0.950171	0.99798	0.955091		0.984896	1.00271	0.996104	0.919796	0.948905	0.984763	0.993873		0.953723	0.976186	0.989162	0.960009	0.980594	0.940157		0.967615	0.989382	0.980186
28.467	0.990348		0.966918	0.982058	0.955193	0.993233		0.911289	0.998037	0.97961		0.920033	0.988594	0.987612	0.972913	0.996247	0.985761	0.932724	0.990809	0.998079	0.966883	1.0126	0.978024	0.997182	0.9965		0.980826	0.957779	0.994015	0.936887		0.987748	0.999559	1.00214	0.928414	0.9457	0.996591	1.00103		0.95955	0.984894	0.99641	0.954377	0.98805	0.927447		0.967041	0.992839	0.98116
28.5	0.989245		0.962595	0.978426	0.954561	0.981164		0.923917	1.01694	1.00059		0.917984	0.997828	0.995235		0.98977	0.980515	0.922828	0.991627	1.00662	0.974853	1.02069	0.978024	0.987236	0.992883		0.969386	0.959588	0.988997	0.946703		0.990773	1.00417	0.993756	0.927482	0.934823	0.998523	0.977905		0.951638	0.989902	1.00328	0.937716	0.990608	0.936837		0.976095	0.976381	0.977262
28.533	0.984376		0.98302	0.978866	0.950434	0.99452		0.918949	0.994266	0.971187		0.919858	0.996708	0.986659	0.973862	0.981396	0.979878	0.925047	0.989653	1.00602	0.975275	0.998367	0.973752	0.983116	0.992883		0.98023	0.957624	1.00576	0.963802		0.990182	1.00716	1.0064	0.925071	0.976104	1.00086	0.983196		0.961305	0.995835	0.996794		0.994071	0.941768		0.958394	0.979439	0.973127
28.567	0.984376	0.96537	0.989766	0.969475	0.95088	1.0003		0.913269	0.994758	0.968343		0.925404	0.986517	0.997767	0.966433	0.987087	0.986162	0.928016	0.995982	0.989717	0.976293	1.00189	0.965609	0.977517	1.00634		0.966755	0.962519		0.957918		0.989765	1.00401	1.00427	0.923592	0.98242	1.00222	0.995583		0.963389	0.979662	0.992164	0.949546	0.989329	0.939588		0.967041	0.990112	0.979782
28.6	0.995216	0.959164	0.983467	0.965843	0.963001	0.966417		0.922833	0.985653	0.969443		0.936995	0.988826	1.00578	0.96928	0.981166	0.985595	0.920099	0.982508	1.00298	0.986721	0.978987	0.964641	0.987783	0.983596		0.971668	0.955596	1.00105	0.967181		0.988166	1.00424	1.00781	0.93758	0.985531	1.00456	0.999712		0.954915	0.993218	0.998487	0.945446	1.00115	0.934323		0.972918	1.00577	0.970606
28.633	0.992097	0.966467	0.993008	0.96522	0.958242	0.977274		0.924814	0.983767	0.985567		0.94961	0.988034	0.99793	0.976546	0.994119	0.991007	0.923817	0.991218	0.993775	0.978504	1.00304	0.967946	0.98421	0.995164		0.980056	0.959588	0.986457	0.966953		1.0074	1.00385	0.994854	0.926549	0.997964	1.00182	0.989583		0.954518	1.00008	0.997019	0.94408	1.00296	0.933351		0.956771	0.978076	0.96785
28.667	1.00294	0.960073	0.981754	0.976997	0.945043	0.97538		0.920481	0.983767	0.997668		0.942863	0.98843	0.992771	0.962963	0.979824	0.995686	0.905524	0.991049	0.992761	0.977064	1.01276	0.973987	0.974104	1.01302		0.981073	0.96177	0.995439	0.959184		1.00395	1.0163	1.01972	0.939671	0.995147	0.998758	0.991454		0.954353	0.988369	1.00427	0.954709	0.993696	0.930434		0.973492	0.986587	0.979782
28.7	0.994759	0.96885	0.993903	0.979125	0.950249	0.975203		0.92825	0.984752	0.988867		0.935019	0.991695	0.997536	0.970459	0.985123	0.988502	0.94245	0.99064	0.993355	0.982998	1.01669	0.976324	0.983277	1.001		0.968615	0.949797	0.991846	0.961621		0.990355	1.00354	1.00906	0.930666	1.01117	1.01155	0.983584		0.947799	0.991527	1.00296	0.954143	0.994071	0.945658		0.972681	0.984659	0.965496
28.733	0.991451	0.971499	0.988052	0.966725	0.958504	0.980202		0.924551	0.993077	0.990156		0.91873	0.991695	0.998883	0.989735	0.974852	0.99318	0.931565	0.988258	0.979254	0.978678	1.00704	0.965208	0.975971	1.00666		0.975985	0.951825	0.991102	0.97316		0.983887	1.00538	1.00141	0.931212	1.03361	1.00769	0.99768		0.946839	0.986136	0.995868	0.960341	1.00334	0.926544		0.978222	0.985058	0.975716
28.767	1.00119	0.965104	0.991742	0.989397	0.955454	0.984344		0.914538	0.981185	0.954796		0.920179	0.98899	0.98715	0.992419	0.982047	0.987533	0.918629	0.994009	0.990485	0.964775	1.0153	0.977057	0.977451	0.994152		0.98132	0.948893	0.998134			0.992199	1.0176	0.993756	0.954751	1.03549	1.01775	1.00033		0.965706	0.992677	0.999029	0.944411	1.00424	0.931239		0.989234	0.99613	0.968657
28.8	1.00073	0.964007	0.980673	0.998165	0.919831	0.988485		0.946744	0.992176	0.957452		0.900393	0.990738	1.00858	0.989179	0.976749	0.9881	0.91805	1.00139	0.994964	0.955787	1.00091	0.964406	0.979704	1.01178		0.981742	0.952354	0.998288	0.966724		0.993035	1.01445	1.00052	0.983499	0.989675	1.00279	0.990906		0.982818	0.992677	0.999413	0.942479	0.98699	0.9301		0.990213	0.988749	0.980019
28.833	0.982171	0.97479	0.978064	0.977878	0.947831	0.990201		0.924103	0.991972	0.982644		0.910037	0.996872	1.01357	0.991077	0.977697	1.00197	0.934364	1.00255	0.979674	0.980962	1.00467	0.967545	0.989969	1.00077		0.976654	0.955971	1.00046			0.987748	1.00723	1.01009	0.96774	1.00554	1.00689	0.997066		0.970835	0.978354	0.995326	0.942313	0.986615	0.928725		0.997881	0.999986	0.977902
28.867	0.990158	0.948114	0.980225	0.9854	0.948277	0.994165		0.916968	0.984548			0.884529	0.9819	0.998257	1.00191	0.985515	0.994786	0.954226	1.00731	0.975021	0.962142	1.0108	0.972384	0.977997	0.978345		0.992412	0.946865	0.985123	0.960679		1.00009		0.995006	0.97504	1.00476	1.01888	0.993485		0.940121	0.999534	1.00404	0.941512	0.981718	0.921279		0.98589	1.00537	0.982608
28.9	0.995673	0.925107	0.982201	0.986829	0.940207	1.00434		0.925712	1.00366	0.955252			0.985329	1.01913	1.00744	0.994838	0.991477	0.952827		0.971138	0.972992	1.01317	0.971582	0.989489	1.00187		0.990129	0.94671	0.979515	0.966562		0.999921	1.01038	1.00671	0.968513	1.00211	1.01348	0.979776		0.938599	0.974813	0.9944	0.938213	0.980813	0.922085		0.987848	0.984259	0.976356
28.933	0.9975	0.928022	0.997779	0.992846	0.918753	1.00434		0.920558	0.991479	0.959008		0.890075	0.990342	1.0023	0.985709	0.981329	1.00454	0.981496	1.00255	0.992514	0.974606	1.03215	0.969245	0.988009	1.00054		0.990726	0.955971	0.974652	0.980928		0.988583	1.00331	1.00832	0.974108	1.00156	1.02611	0.990131		0.935486	0.982436	0.998871	0.945212	0.986085	0.934962		0.98214	0.986752	0.973432
28.967	0.997689	0.920075	0.971318	0.986829	0.932768	0.996842		0.932103	0.988609	0.96982		0.900144	0.997036	1.01278	0.988556	0.993496	1.0014	0.988084	1.0033	0.974181	0.967058	1.02764	0.978826	0.980703	0.982516		0.990304	0.955971	0.97555	0.959346		0.99606	1.00217	1.00531	0.992664	0.994208	1.02201	0.99426		0.924696	0.97982	0.985299	0.937247	0.9781	0.919904		0.996328	0.986587	0.977331
29	1.00119	0.9494	0.971318	0.986646	0.913732	0.997271		0.938866	0.991972	0.975132		0.898695	0.994563	1.01357	1.00799	0.978646	1.00204	0.990063	1.01259	0.965819	0.974853	1.01839	0.985767	0.986916	0.991641		0.982338	0.959058	0.986021	0.954014		0.991018	1.01369	1.00707	0.949636	1.00156	1.01155	0.987486		0.954751	0.984828	0.984757	0.939179	1.00228	0.947603		0.983357	0.989313	0.973432
29.033	1.00366	0.954964	0.973741	0.986206	0.889936	1.00538		0.934718	0.98217	0.959008		0.909364	0.995123	1.02826	0.989342	0.999418	1.00341	0.966412	1.01177	0.969457	0.98307	1.03164	0.978425	0.993062	0.977238		0.984795	0.953633	0.989242	0.953852		0.999921	1.00233	1.00016	0.940151	0.985142	1.03021	0.977357		0.946839	0.97797	0.987534	0.938779	0.99482	0.92785		0.975283	0.993569	0.992424
29.067	1.00541	0.96885	0.993718	0.982133	0.944073	1.00434		0.927507	1.00218	0.984655		0.919009	0.998552	1.01659	1.00381	0.993334		0.974979	0.999689	0.968862	0.98307	1.01585	0.990509	0.998661	0.971177		0.98869	0.955286	0.993887	0.957299		0.997068	0.995486	0.998023	0.936741	0.995308	1.02788	0.990519		0.95667	0.987061	0.999638	0.942644	0.986241	0.91514		0.974304	0.981367	0.968963
29.1	1.00275	0.977893	0.993085	0.988333	0.927824	1.00641		0.929224	0.995744	0.992167		0.918409	0.967585	1.007	0.995984	0.994675	1.00261	0.969621	0.988188	0.959486	0.983913	1.01372	0.984868	0.996408	0.982192		0.970301	0.947833	0.98955	0.952358		0.991018	0.992877	0.999639	0.937127	0.98757	1.01002	0.990131		0.940683	0.980203	0.989227	0.945143	0.988424	0.92235		0.978627	0.991241	0.981466
29.133	0.995673	0.962001	0.995061	0.972119	0.952698	0.993558			0.983767	0.976043		0.924556	0.972694	1.00279	0.986821	0.991599	1.00809	0.991703	1.00207	0.969877	0.975696	1.01683	0.993011	0.98553	0.998714		0.983602	0.961835	0.981402	0.972446		1.00277	0.994722	0.998023	0.926963	0.995858	1.01685	0.974551		0.950514	0.99191	0.985524	0.934279	0.976821	0.921377		0.979033	0.998058	0.9774
29.167	0.994113	0.968396	0.99219	0.974687	0.914995	1.01159		0.93509	0.988031	0.997101		0.923707	0.956042	0.9951	0.988556	0.990258	1.01978	0.988904	1.00445	0.9605	0.986546	1.00938	0.993813	0.997342	1.0006		0.970723	0.954007	0.990602	0.970171		0.99387	0.993417	1.00302	0.941337	0.989836	1.01958	0.986777		0.954189	0.98167	0.985299	0.924382	0.990078	0.924697		0.976095	0.995731	0.976997
29.2	0.985936		0.984363	0.962287	0.956826	1.00366		0.936808	0.999923	0.979155		0.917912	0.962012	1.01636	0.999617	0.979039	1.02172	0.990473	0.998533	0.971906	0.989004	1.01667	0.994615	0.961132	0.986984		0.972336	0.954537	0.98348	0.957137		1.00781	0.990267	0.999639	0.924099	0.999064	1.00776	0.994874		0.951638	0.979054	0.984757	0.935646	0.98752	0.927447		0.975689	0.99726	0.978946
29.233	0.990348	0.988677	0.987867	0.986206	0.966344	1.00659		0.929596	0.980608	0.971187		0.908619	0.975699	0.999701	0.983974	0.979039	1.00478	0.969621	0.99952	0.973761	0.979594	1.02673	1.00066	0.990582	0.991709		0.983355	0.949267	0.994015	0.965068		0.995469	0.98804	1.00302	0.94957	0.992492	1.02055	0.984359		0.952598	0.989453	0.986066	0.956007	0.988799	0.939588		0.986127	0.991076	0.972694
29.267	0.995216	0.97059	0.986786	0.980188	0.953961	0.998484		0.934378	0.984668	0.964964		0.907594	0.977051	1.007	0.985316	0.993334	1.01083	0.985525	0.997547	0.985341	0.978998	1.00227	0.992845	0.998822	0.979587		0.974372	0.959432	1.0012	0.964516		1.00034	0.989727	0.996104	0.929694	0.997575	1.01958	0.981553		0.954353	0.980904	0.981595	0.948276	0.995725	0.922988		0.984336	0.993637	0.98698
29.3	0.995673	0.969038	1.00002	0.979748	0.954408	1.00452		0.926795	0.974373	0.971376		0.910843	0.981108	0.998748	1.00191	0.980543	1.00284	0.977028	0.997955	0.975964	1.00171	1.02395	0.992679	0.983823	0.989819		0.978442	0.959213	1.00576	0.968514		1.00966	0.996949	1.00464	0.917119	1.0057	1.01709	0.996518		0.944125	0.98792	0.989611	0.969838	0.993852	0.917321		0.987512	1.00408	0.97236
29.333	0.990615	0.973615	0.975717	0.958397	0.961323	0.996591		0.92175	0.982698	0.979344		0.908794	0.984769	1.00144	0.989112	0.994675	0.998564	0.969621	1.00388	0.971065	0.994938	0.998913	1.00179	0.985143	0.985094		0.984373	0.953943	1.00554	0.965296		1.00378	0.999941	1.00765	0.927057	0.992881	1.00309	1.02839		0.951076	0.98722	0.990762	0.943445	0.976821	0.916348		0.974709	0.99204	0.965872
29.367	0.98529	0.972784	0.979592	0.968229	0.965004	1.00098		0.921564	0.973388	0.990344		0.914941	0.973622	0.999932	0.982076	0.981721	1.01922	0.968801	1.00248	0.967428	0.983913	1.00816	0.984467	0.990582	0.987537		0.983355	0.956656	0.989151	0.97456		1.00135	0.997173	1.01244	0.917119	0.996864	1.01339	0.996839		0.948594	0.976438	0.998169	0.932181	0.9854	0.917488		0.98491	0.986256	0.971552
29.4	0.983274	0.967487	0.979592	0.969733	0.950727	1.00013		0.943308	0.972403	0.9897		0.908546	0.9788	1.0047	1.00151	0.995231	1.00622	0.960474	0.996391	0.977993	0.981456	1.01348	0.986637	1.00426	0.972581		0.979634	0.954847	1.00966	0.981386		1.00093	1.01054	0.996988	0.930787	1.00211	1.00696	1.00361		0.953064	0.97883	0.990378	0.940146	0.991047	0.92453		0.984504	0.983529	0.986242
29.433	0.987685	0.962189	0.985891	0.979565	0.957196	1.00427		0.931314	0.953988	1.00344		0.91699	0.99664	0.99819	0.9933	0.977534	0.995491	0.97102	1.0051	0.974529	0.983913	0.993118	0.986071	0.98701	0.982975		0.991918	0.950107	1.03082	0.974008		0.999085	1.01369	0.999273	0.921848	1.00586	0.987565	1.01203		0.935555	0.986071	1.00079	0.939745	0.998348	0.909473		0.969742	0.989148	0.994108
29.467		0.958443	0.986972	0.971861	0.956118	1.00909		0.913083	0.975971	0.984655		0.919888	0.999509	1.00969	0.991565	0.996179	0.996626	0.952317		0.973935	0.986793	0.996641	0.987038	1.00497	0.997932		0.962088	0.963359	1.01369	0.963963		0.993208	1.01522	0.999791	0.926351	0.999452	0.99746	1.00252		0.937872	0.972131	0.996159	0.934348	1.00197	0.919196		0.990381	0.982964	0.979252
29.5	0.983274	0.976076	0.989133	0.97098	0.975862	0.995127		0.92418	1.00082	0.984655		0.928932	0.991231	0.993262	0.991403	0.98519	0.993886	0.952727	1.01225	0.971486	0.99213	0.998844	0.988241	0.992609	0.977076		0.988269	0.962455	1.00718	0.96601		1.00194	1.00669	1.00104	0.937993	0.982648	1.00133	0.983196		0.957931	0.975289	0.993381	0.936115	1.00378	0.924864		0.986631	0.990112	0.985503
29.533	0.987953	0.97479	0.978959	0.979748	0.972181	0.99452		0.915513	0.995863	0.975588		0.916814	0.989318	0.996515	0.986428	0.981166	1.00558	0.960474	1.00469	0.978833	0.987636	1.00792	0.983402	0.974811	0.98369		0.985812	0.972091	1.00867	0.990582		0.975157	1.01114	1.00442	0.916093	1.00188	1.00575	1.00391		0.959618	0.985687	0.996926		0.998348	0.916279		0.974808	0.991475	0.983318
29.567	0.992175	0.965935	0.975717	0.980811	0.974153	0.988308		0.924442	1.01141	0.978888		0.917239	0.98955	0.99612	0.986591	0.987805	1.00922	0.955286	1.01735	0.961094	0.991534	1.0166	0.97212	0.983277	0.980302		0.966405	0.959368	1.00523	0.985479		0.992372	1.02082	1.00619	0.934423	1.00509	1.01009	0.994326		0.939791	0.989004	1.00302	0.945612	1.00106	0.928989		0.979943	0.989547	0.982914
29.6	0.989969	0.965104	0.984996	0.98569	0.965081	0.988737		0.934007	0.990614	0.970276		0.907594	0.988198	1.00588	0.985642	0.979824	1.00027	0.964842	1.01201	0.958645	0.983142	1.02845	0.994283	0.979544	0.985418		0.970054	0.967725	1.01601	0.989411		1.00354	1.00322	1.00921	0.924712	0.991875	1.00076	0.998068		0.944028	0.994778	0.99801	0.941912	0.99504	0.911584		0.980922	0.985856	1.0011
29.633	0.985747	0.969304	0.981754	0.983745	0.990401	0.996413		0.936622	0.999227	0.961664		0.924483	0.993771	0.99382	0.993463	0.979987	0.998329	0.969381	1.0033	0.962877	0.970257	1.01185	1.00089	0.981797	0.9774		0.973776	0.972091	1.01056	0.99419		0.989938	1.01843	1.00317	0.933877	1.01775	0.999627	0.975326		0.938599	0.989387	1.01174	0.937081	1.0034	0.912959		0.984267	0.989547	1.01408
29.667	0.98841	0.973693	0.968971	0.96709	0.961847	1.00331		0.932289	0.991803	0.962308		0.908019	0.983745	0.975252	0.995591	0.979201	0.998329	0.965422	1.00905	0.96879	0.967203	1.01341	0.988407	0.989649	0.980694		0.974793	0.976457	1.00024	0.989801		0.992372	1.01951	1.00692	0.928988	0.998675	1.01129	0.983584		0.95194	0.996469	0.988685	0.940214	0.967775	0.926239		0.968287	0.991145	0.99273
29.7	0.986393	0.955606	0.983282	0.980553	0.956641	0.987879		0.943571	1.00419	0.961208		0.913141	0.991067	0.993983	0.986265	0.993496	0.995021	0.973169	0.986623	0.971239	0.976365	1.01365	1.00009	1.00185	0.978804		0.968615	0.982256	1.00473	0.965943		1.00354	1.02527	1.00141	0.925258	0.995308	1.01169	0.96481		0.934595	0.995544	0.987217	0.943679	0.967401	0.911015		0.974402	0.994835	0.994916
29.733	0.983274	0.97233	0.962857	0.977545	0.970025	0.993485		0.944205	1.01161	0.954796		0.909467	0.998948	0.991914	0.96928	0.975963	0.998495	0.960234	1.00428	0.96879	0.98704	1.00277	0.994214	0.997342	0.991546		0.979881	0.983005		0.968999		0.997241	1.0162	1.01009	0.935516	0.997575	1.00992	0.973616		0.948265	0.998927	0.98182	0.935314	0.960694	0.919599		0.972037	0.989216	0.991184
29.767	0.984376	0.97059	0.971765	0.965145	0.976309	0.997626		0.928962	1.01994	0.956352		0.910492	1.0007	0.983665	0.975922	0.988917	1.00495	0.965012	1.01997	0.982225	0.994588	1.01643	0.988974	0.980637	0.981247		0.963949	0.951386	1.00743	0.982423		1.00698	1.01951	1.00067	0.923873	0.989286	1.01379	0.97697		0.956341	0.991686	0.997402	0.943679	0.965062	0.925669		0.975382	0.977813	0.989471
29.8	0.989702	0.971687	0.971318	0.957881	0.957272	0.99702		0.942859	1.02756	0.958741		0.910316	1.01089	0.999932	0.990454	0.989472	1.0131	0.976718	1.00568	0.965747	0.984757	1.00318	0.991711	0.984983	0.990372		0.958614	0.95703		0.971827		0.985904	1.03396	0.996256	0.922714	0.985303	1.01419	0.978453		0.946345	1.01325	0.987376	0.943113	0.964312	0.939352	0.948478	0.977173	0.981105	0.998243
29.833	0.982171	0.968584	0.989056	0.97604	0.967869	0.987021		0.929333	1.00697	0.939506		0.913638	1.00818	1.00128	0.980341	0.990421	1.00648	0.962213	1.00946	0.980022	0.990865	0.991322	0.974056	0.986849	0.987537		0.98132	0.934142	0.993297	0.974493		1.01731	1.01989	0.98242	0.930561	0.994692	0.999627	0.982034		0.953064	1.00008	0.993698	0.959609	0.976665	0.938949	0.952117	0.98582	0.978047	0.987453
29.867	0.992364	0.968396	0.980148	0.9694	0.968762	0.991591		0.930788	1.00866	0.958285		0.909364	1.00723	1.00588	0.997489	0.985285		0.967571	1.00806	0.975123	0.991287	0.991897	0.98961	0.982343	0.990926		0.985391	0.952509	1.00182	0.975987		1.00312	1.02136	0.983304	0.933358	0.990775	1.01322	0.979776		0.939956	1.001	0.982905	0.939248	0.978319	0.946964	0.958376	0.983455	0.982468	0.969436
29.9	0.975553	0.965747	0.987342	0.966649	0.969578	0.996768		0.92907	1.01173	0.974032		0.913038	1.00508	1.00532	0.990223	0.979757	1.00431	0.968971	1.01538	0.981283	0.981034	1.00016	0.984536	0.989649	0.985027		0.976232	0.943468	1.00219	0.981871		0.999503	1.01175	0.985803	0.936156	0.98812		0.990452		0.945153	1.004	0.985682	0.939248	0.978539	0.959841	0.951723		0.988252	0.965704
29.933	0.984644	0.960638		0.971162	0.990401					0.973387			1.00587	1.00191		0.983551	0.978078	0.97194	1.02351	0.977573	0.99901	1.00507	0.998721	0.98701	0.977629		0.991394	0.948737		0.981871		1.01084	1.01805		0.931267	0.999613		0.985775				0.979201			0.948339	0.954411		0.986889	0.956529
29.967	0.991529			0.982681	0.972181					0.977599			0.997432				0.989373					0.996809		0.974811	0.980464																			0.972207				0.978943
30
Mean body lengths during stimulation
unc-29	flwr-1; unc-29
1.02692	1.01552
1.01639	1.03297
0.994299	1.00741
1.00308	1.02734
1.05205	1.02843
1.03895	1.03567
1.01844	1.0221
1.01798	1.0057
1.03792	1.0371
1.04048	1.03403
	1.0323
1.01123
1.00725	1.00534
1.01382	1.01429
1.01831	1.03689
1.00659	1.01938
1.01259	1.03448
1.01422	1.05065
1.02033	1.02785
1.00696	1.03845
1.00166	1.00397
1.01948	1.00831
1.01093	1.01383
1.01553	1.02045
1.01409
	1.01355
1.02042	1.00899
0.971572	1.00748
1.01441	1.02979
1.01291	0.995243
1.0163	0.998804
1.01739	1.02056
1.01481	1.00331
1.00917	0.998609
1.0111	1.02209
0.993519	1.02091
1.00095
1.01548	1.00452
	1.03239
1.00472	1.02204
0.988399	1.01697
0.988188	1.00456
1.00569	1.02549
1.01835	1.00916
0.984089	1.00521
1.00258	1.00375
1.03098	1.0127
1.01241	1.01945
1.01333	1.01773
1.01572	0.992302
1.01528	1.00733
1.02576	1.04844
1.01231
1.00881
[truncated: 54 more columns]

## Sheet: Fig4E+F
Time (s)	wild type
0.2	-0.02767	0.052275	0.011121	-0.04825	0.097288	0.180766	0.221756	-0.09007	-0.00581	-0.0189	0.010718	0.075658	-0.01499	0.010726	0.183623	0.02162	0.051402	-0.03117	0.007189	-0.04413	0.016732	-0.00726	0.010194	0.170722	0.027865	0.03221	0.022881	0.05825	0.073428	0.0533	0.02406	-0.0288	-0.03681	-0.10048	-0.17699	0.055448	0.037204	-0.02182	-0.02882	-0.00696
0.4	0.014764	-0.02145	-0.00723	-0.05338	0.068134	0.109988	0.07765	-0.05706	0.000504	0.001685	0.000738	0.058622	-0.03484	-0.0274	0.179812	0.095023	-0.12525	-0.02186	0.018117	-0.03139	0.062061	-0.00144	0.048788	0.104238	0.018912	-0.00692	0.02846	0.098467	0.045422	0.027958	-0.04634	-0.00395	-0.02797	-0.06856	-0.1311	0.01292	0.025037	0.0034	-0.09453	-0.03602
0.6	-0.03824	0.012527	-0.03824	-0.03334	-0.018	0.038812	0.304033	-0.05349	-0.01579	-0.00413	0.000726	0.078645	-0.03059	-0.0158	0.10678	0.041328	-0.06012	-0.01194	0.034553	-0.03737	0.030208	-0.04774	0.011707	0.035294	0.003217	-0.02786	0.018895	0.085609	0.03978	0.018556	0.102766	-0.00599	-0.03981	0.01841	-0.08284	0.038966	-0.01325	-0.00757	-0.05414	-0.01478
0.8	-0.02532	0.008866	-0.0237	-0.03281	-0.02063	0.010739	0.477763	-0.03046	-0.02902	0.005887	0.013616	0.077226	0.000243	0.001213	0.081965	-0.00536	0.009904	0.000542	0.051837	-0.01579	0.042183	-0.00227	-0.02444	0.021797	-0.01365	-0.01811	0.010249	0.073508	0.02102	0.013536	-0.0556	0.022461	-0.02392	0.078039	-0.09004	0.021095	0.00476	0.013383	-0.03747	0.031888
1	0.048945	-0.01196	0.006212	-0.05605	0.044551	-0.07666	0.335513	-0.04465	-0.04742	-0.0017	0.016855	0.081787	-0.06898	-0.04486	0.011437	0.025213	-0.03088	0.017284	0.065743	-0.04444	0.01579	-0.02523	0.01963	-0.00284	0.002327	0.006485	0.014252	0.016042	0.017225	0.010629	-0.01496	-0.01962	0.000717	0.059463	0.146044	0.017315	0.013568	0.068145	-0.03984	0.008395
1.2	0.005575	0.022015	0.008452	-0.02886	-0.03969	-0.03498	0.362176	-0.04404	-0.07151	0.010562	-0.00954	0.053171	-0.0424	-0.03045	0.007709	0.056538	-0.00985	0.014885	-0.01026	-0.02806	0.032777	-0.02259	0.00718	0.003793	-0.00992	0.015502	0.017918	-0.02443	0.026877	-0.0132	0.12202	-0.00926	-0.01667	0.086251	0.066564	0.018348	0.016276	-0.00655	-0.03369	0.027953
1.4	0.003362	-0.00803	-0.027	-0.02567	-0.05375	-0.00351	0.117228	-0.02773	-0.01381	0.004938	0.001079	0.056	0.005286	-0.00957	-0.02596	0.008343	-0.00572	0.01061	-0.00214	-0.02364	0.000594	0.01228	0.051459	0.034355	0.012287	0.01019	0.01117	-0.0253	-0.00534	0.040544	0.084116	-0.00365	-0.01018	0.041919	-0.01049	0.031085	0.001262	-0.00657	-0.03689	-0.03676
1.6	-0.02225	-0.01327	-0.02318	-0.01222	0.022725	-0.03285	0.119003	-0.04299	-0.01215	0.010228	0.0019	0.079731	-0.05095	-0.0159	-0.03925	-0.00109	-0.02826	0.006891	-0.02874	-0.00705	0.017145	0.010819	0.010296	0.049972	0.02742	-0.00658	0.003805	-0.00241	-0.01202	0.023151	0.140734	0.005301	-0.01381	0.055179	0.106473	0.066936	0.010531	0.008318	-0.03113	-0.012
1.8	-0.03958	-0.02844	0.010245	0.003878	-0.08711	-0.00455	0.164608	-0.01987	-0.01986	0.001551	-0.00632	0.051431	0.009693	-0.01341	-0.06265	0.003892	0.042822	-0.01751	-0.0235	-0.00437	0.001531	0.00432	0.062636	0.020473	-0.03246	-0.0136	0.018634	0.013748	0.018377	-0.02186	0.118488	0.002985	-0.01605	-0.0051	0.163079	0.062943	0.047438	0.008603	-0.02413	0.001568
2	0.032665	-0.0128	-0.01133	0.004056	-0.12197	-0.18061	0.056825	-0.02347	-0.00289	-0.00682	-0.01917	0.032944	-0.01546	-0.00406	-0.016	-0.01592	-0.06595	0.016407	-0.05369	-0.02755	0.000388	8.03e-05	-0.05816	0.003714	0.02939	0.016111	0.004262	-0.02104	0.000787	-0.03393	0.088189	0.031234	-0.00137	-0.00531	-0.04372	0.030728	0.024042	0.009431	-0.03872	0.048771
2.2	-0.0026	0.019244	0.016079	0.008798	-0.09162	-0.00123	-0.15804	-0.02867	0.032987	-0.00844	0.005454	-0.01181	-0.04193	0.001557	0.009801	0.034023	-0.05546	0.030434	-0.01007	-0.00417	-0.00921	-0.02224	-0.01928	-0.00196	0.004516	0.001778	-0.00352	-0.0631	-0.05072	0.012719	-0.04522	0.025773	-0.01661	-0.03157	0.075977	0.026399	0.00531	-0.02022	-0.02273	0.014466
2.4	0.032735	-0.02589	0.051316	0.016855	-0.08596	0.089934	-0.20774	0.009087	-0.00019	-0.00819	0.001242	0.062918	-0.0234	-0.0323	-0.03682	-0.0254	-0.03186	0.019994	0.02261	-0.01948	0.017295	0.009634	-0.04563	-0.02142	-0.00622	-0.00909	-0.032	-0.04907	-0.02576	-0.00672	-0.06238	0.012021	0.012888	-0.06864	0.049527	-0.00346	-0.01559	-0.03495	0.006139	-0.01967
2.6	0.004794	0.010669	0.040085	0.03863	-0.15813	0.02794	-0.57228	-0.00754	-0.01819	-0.02367	0.004924	-0.00198	-0.01177	-0.01064	-0.09516	-0.00574	0.006505	0.016821	0.019682	-0.00767	0.009305	0.00813	0.026598	-0.00784	0.003392	0.009876	-0.0137	-0.0209	0.010464	-0.01941	0.069476	0.025264	-0.00642	-0.06663	0.00047	0.002649	-0.00438	-0.00453	-0.01048	0.038345
2.8	0.013639	0.024624	-0.0221	0.020812	0.001417	-0.0011	-0.50701	-0.01314	0.083314	0.009637	0.030435	-0.03677	0.06881	-0.00188	-0.09995	0.027389	-0.01661	0.010784	0.049963	-0.01321	-0.00641	-0.03568	-0.03476	-0.05569	-0.02369	0.006258	0.001881	-0.00462	0.019237	-0.01412	0.007702	-0.00351	-0.00203	0.061594	-0.02659	0.01455	-0.00014	-0.00618	0.006358	0.037571
3	-0.01083	-0.028	-0.03587	0.026295	0.021372	0.012996	-0.48371	0.010702	0.062171	-0.00562	-0.00887	-0.01839	-0.03229	0.020317	-0.10465	-0.04361	0.102622	0.015058	-0.03249	-0.00069	-0.00922	0.027369	-0.02499	-0.05226	-0.00726	-0.01703	-0.00859	0.028798	0.008826	-0.00921	-0.13892	0.029981	0.023168	-0.06756	-0.0092	0.026547	-0.01079	0.001548	0.010894	-0.01681
3.2	-0.0046	0.011076	0.004131	0.015598	0.003879	0.070348	-0.15977	0.016216	0.024425	0.013734	-0.01186	-0.03858	0.038966	0.02553	-0.08116	-0.00615	-0.0144	0.0331	0.009405	-0.00668	-0.0253	-0.00387	0.002297	-0.03385	-0.02866	0.003843	-0.00783	0.044799	0.018933	0.001523	-0.11425	0.020889	0.019858	-0.02281	-0.11733	-0.02489	-0.02338	0.022242	0.025029	-0.04787
3.4	-0.00582	0.064407	-0.05264	0.019075	-0.02752	-0.09031	-0.37251	0.035133	0.03707	-0.01019	-0.01503	0.002776	-0.00152	0.00631	-0.12021	-0.02618	0.002483	0.000369	-0.02928	0.021309	-0.01584	-0.00556	-0.03759	-0.04726	-0.01818	-0.0062	-5e-05	-0.00588	-0.04163	0.013738	-0.00582	0.006041	-8.4e-06	-0.03805	-0.05197	-0.0085	-0.00135	-0.004	0.055585	-0.00635
3.6	0.036724	-0.00793	-0.04706	0.020096	0.014302	0.004537	-0.14658	0.051526	0.008476	-0.00701	-0.00167	-0.00499	0.049317	-0.00442	-0.09554	-0.04121	0.054845	-0.00605	-0.04252	-0.0014	-0.03043	-0.01561	0.019274	-0.07921	-0.02461	0.038318	-0.01245	-0.03091	-0.03562	0.026992	0.035454	-0.01648	0.010285	-0.03744	-0.00321	-0.02127	-0.03015	0.002481	0.074818	-0.02783
3.8	0.004573	-0.02448	0.018618	0.019266	0.014144	-0.0509	-0.03947	0.044582	0.048741	0.005001	0.005813	-0.03019	0.027219	0.000248	-0.0822	-0.02334	0.071131	-0.04049	-0.02421	0.009944	-0.03414	0.007479	0.000886	-0.05664	0.014067	0.001866	-0.01359	-0.02102	-0.015	-0.0436	-0.02422	-0.02062	0.018741	-0.01479	0.018266	-0.09455	-0.0259	-0.00143	0.023527	-0.02737
4	0.030382	0.004942	0.04217	0.015302	0.037281	-0.02777	0.006888	0.034115	0.00678	0.014269	0.001608	-0.08108	0.035856	0.032718	-0.02727	-0.00736	-0.04522	-0.02607	-0.00696	0.039512	-0.026	0.02421	-0.05053	-0.01712	0.008872	0.011817	-0.01387	-0.01788	-0.03917	-0.00829	0.017695	-0.01501	0.056296	0.069776	-0.0914	-0.09001	-0.01689	-0.02552	0.035363	0.065621
4.2	-0.00237	0.009209	0.008607	0.024969	0.093128	-0.01767	-0.08416	0.042441	-0.02205	0.019219	-0.00615	-0.04158	0.005539	-0.00411	-0.01254	-0.03681	0.09226	-0.01439	-0.00358	0.036237	-0.00174	0.018959	0.025263	-0.06083	-0.02032	-0.01053	-0.00772	-0.01128	-0.03291	-0.01527	-0.03848	-0.0041	0.008706	0.026439	-0.03951	-0.06059	-0.00116	-0.00301	0.056624	-0.03514
4.4	-0.0088	-0.05169	0.032547	0.018195	0.199092	0.001031	-0.00869	0.077606	0.00833	-0.014	0.014167	-0.08573	0.014989	0.043475	0.079317	-0.00434	0.055934	-0.02635	-0.00143	0.077943	-0.01315	0.05505	0.002208	-0.03833	0.008004	-0.02515	-0.011	-0.03565	-0.0106	0.011393	-0.06938	-0.0063	0.000209	-0.02353	0.018823	-0.07215	-0.00655	0.00297	0.031842	0.006344
4.6	-0.01335	-0.0022	0.020933	0.025986	0.073058	0.035675	0.295477	0.095745	-0.04764	-0.00319	-0.02244	-0.17845	0.017308	0.024385	0.130706	-0.06919	-0.00398	-0.01127	-0.01117	0.0863	-0.0407	0.004796	0.022313	0.023634	0.018482	-0.01428	-0.01361	-0.04858	0.002084	-0.07499	-0.16441	-0.0211	0.04184	0.027359	0.059611	-0.04373	-0.01768	0.006768	0.037382	0.018603
4.8	-0.02673	-0.00371	0.017831	0.012763	0.014015	-0.06065	0.201039	0.066029	-0.00648	0.015174	-0.00824	-0.18136	0.095908	0.048298	0.108225	-0.00168	0.003642	0.013915	0.000951	0.045839	-0.03389	0.006373	-0.02535	0.007255	0.006209	0.001094	-0.01447	-0.03716	-0.03368	0.006553	-0.03071	-0.02358	0.018965	0.026044	0.169551	-0.00678	-0.01823	-0.00494	0.089014	-0.01197
5	-0.04707	0.033655	0.017423	0.029103	0.108043	0.040813	0.3371	0.0877	-0.01756	0.017841	0.002143	-0.16758	0.007088	0.025591	0.07984	0.019402	0.044362	0.001406	-0.00428	0.04734	-0.01791	-0.00333	-0.03475	0.046577	0.013724	-0.02084	-0.02621	-0.02218	-0.01023	-0.01883	-0.08447	-0.0308	0.029609	0.008759	0.109109	-0.02232	-0.02973	-0.00845	0.065998	0.012112
5.2	0.106517	0.053568	0.275703	0.04634	0.42009	0.05871	0.299648	0.113415	0.019791	0.015212	0.000187	-0.13963	0.058316	0.046563	0.395273	-0.05779	0.023345	-0.0098	-0.03667	0.081833	-0.02713	0.096841	-0.01065	0.137398	-0.01062	0.022899	-0.01088	0.020261	-0.01221	0.083789	0.026893	0.023925	0.049574	0.315827	0.250102	0.073584	0.114735	0.020043	0.073847	0.20955
5.4	0.251991	0.349137	0.660477	0.189669	0.886202	0.301602	0.714316	0.187285	0.233839	0.067417	0.002472	0.301708	0.503062	0.131638	1.11795	0.029033	0.122324	0.087138	0.145896	0.108873	0.017801	0.605905	0.113628	0.429544	0.04035	0.093043	0.06402	0.347898	0.061677	0.072179	-0.00659	0.129895	0.137454	0.854478	0.533971	0.471416	0.44492	0.062505	0.137688	1.28573
5.6	0.408222	0.390182	0.696301	0.24645	0.874871	0.474751	0.638497	0.177612	0.304818	0.094163	0.00456	0.437969	0.758894	0.155442	1.25229	-0.00457	0.094163	0.16163	0.216512	0.080463	0.037977	1.13343	0.165981	0.543712	0.107829	0.118418	0.090192	0.481157	0.113262	0.079555	-0.0993	0.169167	0.129584	0.867453	0.879455	0.601162	0.475021	0.086427	0.2238	1.55259
5.8	0.338161	0.416816	0.666521	0.263177	0.860517	0.51564	0.758173	0.188149	0.291807	0.083023	0.003475	0.488413	0.916028	0.15198	1.29908	0.009367	0.073682	0.163971	0.244162	0.124779	0.069993	1.46868	0.197505	0.614095	0.096738	0.130765	0.084215	0.519123	0.104344	0.086601	-0.10639	0.228105	0.159459	0.834388	1.0993	0.619281	0.479414	0.113987	0.254282	1.61432
6	0.35654	0.401632	0.674974	0.272813	0.840173	0.507054	0.522641	0.184431	0.286739	0.090729	-0.00371	0.454078	0.821693	0.167955	1.31968	0.041535	-0.00201	0.196207	0.342574	0.137592	0.094178	1.63386	0.282679	0.596934	0.052681	0.104547	0.083088	0.531369	0.100037	0.147833	-0.18624	0.230947	0.168885	0.833523	1.13044	0.569582	0.489973	0.11	0.279342	1.51552
6.2	0.353563	0.424767	0.679514	0.277317	0.857364	0.609368	0.620416	0.168823	0.350769	0.086389	-0.01657	0.46611	0.930126	0.226506	1.3042	0.067731	0.066374	0.197755	0.256346	0.143938	0.076751	1.66773	0.284484	0.618982	0.0651	0.113329	0.075436	0.564379	0.100966	0.116984	-0.03307	0.242082	0.165267	0.782132	1.15671	0.551951	0.47793	0.103232	0.295161	1.52323
6.4	0.352233	0.409809	0.684761	0.273941	0.886446	0.593061	0.786208	0.176006	0.315353	0.073093	-0.02688	0.481219	0.995398	0.205782	1.35416	0.012427	0.084355	0.173175	0.208916	0.140416	0.104451	1.65818	0.337677	0.627053	0.110281	0.11182	0.08265	0.579748	0.088709	0.125463	-0.14541	0.22453	0.152579	0.778106	1.22016	0.573245	0.468258	0.099036	0.279639	1.46306
6.6	0.359183	0.392546	0.622413	0.273515	0.799487	0.453306	0.649555	0.186294	0.299623	0.090197	-0.04435	0.418643	0.906084	0.192552	1.33771	-0.00801	-0.05013	0.207168	0.314828	0.119458	0.060745	1.68002	0.244098	0.612223	0.115775	0.089585	0.074074	0.574282	0.01283	0.179309	-0.17014	0.240217	0.182347	0.835734	1.11599	0.540962	0.476671	0.10761	0.288288	1.40879
6.8	0.347506	0.433071	0.615379	0.286898	0.768835	0.539072	0.564103	0.205362	0.314149	0.089536	-0.04819	0.456351	0.906798	0.185422	1.37687	-0.01777	0.099655	0.189309	0.267291	0.123253	0.101529	1.76751	0.223523	0.581861	0.053878	0.093123	0.072005	0.613942	0.079051	0.149032	-0.1428	0.249075	0.134137	0.729245	1.13973	0.546376	0.496836	0.092868	0.306489	1.26382
7	0.36545	0.389323	0.597556	0.290145	0.794404	0.57075	0.308499	0.207344	0.317595	0.107351	-0.06582	0.403763	1.0178	0.223669	1.38212	-0.01649	-0.01827	0.183894	0.330794	0.109914	0.075449	1.7339	0.270077	0.580087	0.108938	0.098892	0.077295	0.57872	0.074402	0.189635	-0.17154	0.267509	0.160406	0.714385	1.09977	0.556652	0.484306	0.100213	0.344097	1.23103
7.2	0.407205	0.398327	0.560951	0.277511	0.742488	0.418137	0.891517	0.223791	0.334016	0.103916	-0.03458	0.488645	0.95562	0.192275	1.31678	0.003654	-0.092	0.157394	0.313914	0.102911	0.087257	1.74286	0.256089	0.579515	0.076972	0.085292	0.059395	0.57695	0.073232	0.189603	-0.01894	0.263874	0.201077	0.690872	1.21521	0.546179	0.466527	0.094784	0.287479	1.31242
7.4	0.38693	0.387926	0.573192	0.278337	0.694271	0.371869	0.467861	0.222693	0.294438	0.099301	-0.03023	0.445394	0.8967	0.201929	1.31215	0.011719	0.026969	0.191342	0.320651	0.102391	0.080719	1.75836	0.260718	0.616086	0.04205	0.094623	0.072514	0.556745	0.051911	0.159995	0.049871	0.253979	0.180433	0.629912	1.1718	0.537339	0.448	0.075979	0.264366	1.13502
7.6	0.375555	0.41673	0.569777	0.271805	0.737622	0.453477	0.448032	0.229084	0.259811	0.084602	-0.01833	0.449884	0.899535	0.221198	1.36881	-0.00767	0.082824	0.179074	0.325386	0.104761	0.093381	1.79017	0.252834	0.591623	0.043079	0.051541	0.084673	0.558408	0.04052	0.130238	-0.17625	0.261058	0.198979	0.749402	1.36065	0.516444	0.458028	0.068619	0.254451	1.06963
7.8	0.368405	0.365866	0.541127	0.263772	0.709043	0.425688	0.68924	0.231929	0.28919	0.092995	-0.00143	0.424577	0.890162	0.212645	1.31325	0.007325	0.079269	0.178323	0.294139	0.105639	0.077389	1.77828	0.194313	0.611227	0.046078	0.095502	0.081173	0.526473	0.067312	0.148109	-0.1175	0.267209	0.195099	0.658883	1.45757	0.529092	0.452319	0.046014	0.275159	1.12172
8	0.396169	0.404222	0.5634	0.27658	0.644874	0.42627	0.553663	0.231709	0.258296	0.082969	-0.01737	0.456684	0.895458	0.209831	1.32726	-0.04195	0.179633	0.160567	0.293932	0.142985	0.067917	1.70427	0.18854	0.599925	0.08869	0.067314	0.069455	0.516093	0.054238	0.156556	-0.21218	0.233411	0.196352	0.733296	1.39094	0.483815	0.425847	0.043705	0.250857	1.20997
8.2	0.356508	0.365885	0.51858	0.269804	0.712138	0.349303	0.394436	0.24167	0.260421	0.07821	-0.02679	0.45045	0.833956	0.214899	1.29214	-0.07347	0.135912	0.170689	0.339124	0.133763	0.063024	1.62225	0.247747	0.57862	0.083656	0.086696	0.083073	0.524857	0.031811	0.148852	-0.21425	0.252743	0.195251	0.722636	1.28279	0.493858	0.417659	0.052728	0.216252	1.17789
8.4	0.324244	0.383324	0.516589	0.291798	0.634998	0.278184	0.519493	0.226534	0.246747	0.081199	-0.02196	0.475057	0.877382	0.221168	1.29337	0.014821	0.160043	0.176399	0.275436	0.117176	0.083152	1.66665	0.206763	0.593289	0.024173	0.058926	0.071892	0.505873	0.041899	0.145201	-0.11935	0.227464	0.180242	0.775864	1.43577	0.510586	0.421501	0.072061	0.223219	1.06919
8.6	0.346187	0.392998	0.499832	0.29691	0.716011	0.203261	0.454731	0.268018	0.255411	0.05992	-0.01981	0.429577	0.890799	0.233405	1.31096	-0.01268	0.16288	0.178159	0.275324	0.14531	0.098348	1.69213	0.20497	0.579698	0.069923	0.034896	0.052915	0.460991	0.055971	0.212058	-0.21988	0.251502	0.218506	0.807502	1.38623	0.510288	0.43619	0.035065	0.200672	0.993971
8.8	0.318177	0.374455	0.517908	0.284487	0.679197	0.249373	0.503242	0.258638	0.300262	0.038182	-0.00747	0.460598	0.8449	0.21239	1.33462	-0.01923	0.153063	0.192328	0.233891	0.148981	0.06745	1.59188	0.196475	0.604566	0.053345	0.053865	0.023097	0.455311	0.037111	0.171796	-0.14169	0.228862	0.199876	0.681622	1.40793	0.472958	0.398505	0.053725	0.197704	0.910933
9	0.321703	0.42163	0.484852	0.29358	0.65524	0.3062	0.34945	0.274414	0.199845	0.040534	-0.00625	0.471894	0.771058	0.184435	1.25586	-0.0242	0.066313	0.169697	0.254563	0.143335	0.043631	1.50668	0.253355	0.54853	0.07425	0.027877	0.072106	0.458115	0.065876	0.163051	-0.15767	0.239806	0.196171	0.731846	1.4112	0.504064	0.395193	0.0598	0.163866	0.853977
9.2	0.324185	0.364745	0.485415	0.285195	0.674274	0.300892	0.560955	0.270712	0.263798	0.066416	0.001884	0.447898	0.724357	0.234084	1.23866	-0.01651	0.077981	0.147496	0.277759	0.167517	0.064151	1.49408	0.174412	0.580024	0.052798	0.052289	0.082862	0.449659	0.035277	0.24174	-0.15662	0.226138	0.202646	0.711824	1.32305	0.485528	0.385246	0.058628	0.205384	0.78113
9.4	0.30741	0.398544	0.46929	0.284702	0.60341	0.190261	0.398364	0.288472	0.266268	0.056271	-0.00433	0.459734	0.761751	0.235113	1.19854	-0.04202	0.151593	0.145451	0.299845	0.151375	0.063662	1.48074	0.199616	0.598186	0.055476	0.03728	0.080354	0.482536	0.057236	0.310688	-0.06041	0.234039	0.213215	0.751343	1.28099	0.495585	0.399198	0.058257	0.200349	0.903635
9.6	0.313757	0.387401	0.425053	0.274914	0.627051	0.366689	0.373423	0.293513	0.232153	0.066725	0.018115	0.464722	0.837923	0.215589	1.2587	-0.01785	0.106168	0.144645	0.220034	0.184939	0.061687	1.54249	0.178596	0.546203	0.072594	0.036249	0.056606	0.491151	0.070468	0.300044	-0.2329	0.244358	0.238699	0.711167	1.28431	0.523118	0.395019	0.060837	0.208247	0.858198
9.8	0.323711	0.333654	0.445051	0.262125	0.521461	0.360501	0.144671	0.288875	0.240997	0.047544	0.004976	0.473824	0.906798	0.240461	1.25508	-0.04619	0.131311	0.144452	0.293074	0.194266	0.014959	1.55372	0.127794	0.54896	0.065202	0.077186	0.06686	0.484982	0.053922	0.218043	-0.06836	0.255565	0.219653	0.775291	1.33037	0.496485	0.398276	0.068914	0.161355	0.841685
10	0.326058	0.341276	0.416067	0.249769	0.646458	0.449332	0.270347	0.287593	0.22057	0.089161	-0.00433	0.480081	0.881876	0.240254	1.2313	-0.03484	0.017974	0.14546	0.271123	0.218412	0.047903	1.42098	0.163578	0.521844	0.027566	0.05129	0.073573	0.486363	0.063517	0.229515	0.015499	0.212241	0.210404	0.764068	1.32382	0.507569	0.396266	0.041423	0.195839	0.909941
10.2	0.305342	0.375074	0.464561	0.262151	0.654175	0.458827	0.324616	0.306996	0.236875	0.073554	-0.01281	0.464727	0.974948	0.227799	1.2274	-0.04885	0.060466	0.102508	0.254692	0.205453	0.053565	1.44024	0.154015	0.491106	0.016541	0.05199	0.035971	0.503112	0.074111	0.201011	-0.18157	0.233993	0.210399	0.67684	1.22236	0.502877	0.418662	0.045469	0.220627	0.955278
10.4	0.299103	0.371987	0.479028	0.264006	0.634177	0.415483	0.290634	0.353848	0.244652	0.065463	0.009047	0.472063	0.873371	0.247402	1.23331	-0.03522	0.06947	0.137952	0.304209	0.224339	0.011122	1.45134	0.096856	0.503859	0.009091	0.063414	0.06157	0.498848	0.134912	0.182938	-0.25734	0.232513	0.209678	0.71564	1.31448	0.430428	0.408142	0.059778	0.172115	0.934442
10.6	0.304411	0.373298	0.47844	0.254331	0.571074	0.364276	0.226437	0.341308	0.285467	0.055991	-0.00253	0.426793	0.976575	0.257736	1.25528	-0.08718	0.055286	0.109907	0.259841	0.23365	0.019917	1.46714	0.133186	0.527345	0.021517	0.048115	0.040204	0.496174	0.120226	0.2237	-0.16301	0.253904	0.205461	0.713641	1.16766	0.439263	0.399434	0.065639	0.183607	0.800334
10.8	0.341821	0.307007	0.426541	0.243422	0.618081	0.262885	0.150322	0.314173	0.268787	0.074693	-0.01829	0.449543	0.971498	0.261907	1.19134	-0.00782	0.098427	0.122855	0.285237	0.189657	0.026204	1.41501	0.097237	0.559709	0.05846	0.073179	0.039567	0.48957	0.105432	0.215836	-0.25212	0.243772	0.213695	0.753402	1.23983	0.41359	0.38726	0.058181	0.164718	0.803226
11	0.301197	0.350664	0.426447	0.227066	0.568684	0.326978	0.456346	0.348953	0.226135	0.076416	0.000827	0.458225	0.920523	0.287322	1.15095	-0.05076	0.061989	0.136183	0.264542	0.189692	0.041981	1.43955	0.11944	0.541992	0.014629	0.059296	0.0395	0.501943	0.105685	0.186005	-0.21759	0.245865	0.178979	0.648325	1.34417	0.395129	0.394217	0.048033	0.167246	0.819538
[truncated: 87 more rows]
