# Supplementary material for: Flower/FLWR-1 regulates neuronal activity via the plasma membrane Ca2+ ATPase to promote recycling of synaptic vesicles
Source: eLife. 2025 May 20;13:RP103870. doi: 10.7554/eLife.103870 (PMC12092002; doi:10.7554/eLife.103870)
Supplement: Figure 5—figure supplement 1—source data 1. [file elife-103870-fig5-figsupp1-data1.xlsx]

## Sheet: FigS5_1A+B
A			B
wild type	flwr-1		wild type	flwr-1
8.13333	60.6		15	17.8
30.0333	38.8		14.1	13.6
36.2	1.2		13.3	11.6
57.9	30.5667		15.9	11.7
16.0667	6.33333		11.4	11.6
5.73333	83.6667		11.7	22.7
26.4	4.73333		13.6	13.4
39.9333	52.5667		16.2	14.4
55.5	23.6333		10.3	12
80.43	96.6667		13.3	18.4
52.97	43.3667		18	20.4
4.77	39.2333		15.5	11.9
71.2	36.7333		15.1	17.2
47.97	20.0333		14.6	11.7
93.2			18.2
83.77			17.7

## Sheet: FigS5_1C
Time (s)	wild type										flwr-1
2	1727	1309	2105	1307	1001	1160	1922	994.6	2293		2088	1832	1324	1177	1329	2168	1976	1241
4	1354	403.2	1572	770.3	785.9	832	1162	688.8	1992		1704	1280	993.3	651.8	887.4	1638	1419	525.7
6	1235	565.4	1434	730.1	673.7	581.5	1230	576.2	1654		1675	1188	954.6	624	951.7	1618	1422	489.2
8	1151	538.1	1428	679	720.6	713.2	1224	648.5	1681		1451	1067	883.4	593.1	791.1	1715	1221	449
10	1067	334.1	1274	657.1	729.5	800.9	1092	644.5	1687		1222	1041	923.6	695	823.3	1337	1269	445.4
12	1113	285.9	1212	609.6	727.3	767.4	1079	640.5	1403		1291	1084	886.3	574.5	677.3	1389	1237	387
14	1075	470.6	1226	616.9	716.1	727.3	989.4	550.1	1365		1136	970.4	909.2	515.8	685.3	1337	1257	379.7
16	1059	430.5	1173	668	716.1	832.1	799.9	564.2	1729		1228	1067	960.9	741.3	674.6	1534	1281	452.7
18	1067	457.8	1142	613.3	684.9	778.6	652.1	582.3	1879		1233	1084	1015	611.6	570.2	1450	1233	401.6
20	1040	346.9	1103	514.7	689.3	680.4	1102	600.3	1954		1572	990.5	906.4	593.1	629.1	1112	1237	337.3
22	1010	467.4	1236	554.9	693.8	676	1028	524	1986		1520	977.1	857.6	591.2	629.1	1381	1221	397.5
24	1021	383.9	1140	640.5	684.9	655.9	1050	564.2	1815		1285	943.7	763	579.3	631.8	1213	1373	338.6
26	1128	303.6	1400	453.8	604.6	669.3	1054	524	1869		1291	940.3	774.4	516	447.1	1365	1273	507.6
28	1189	300.4	1573	475.8	696	575.6	883.4	421.6	1772		1560	856.7	866.2	569	540.8	1177	1249	319.6
30	1201	244.1	1446	491.9	662.6	678.2	1002	550.1	1778		1187	940.3	854.7	627.1	468.5	1048	1209	555.8
32	1197	300.4	1091	471.8	618	727.8	1050	572.2	1836		1583	890.1	900.6	582.7	444.4	971.8	1462	507.6
34	1201	396.7	1171	411.6	667	705	1018	363.4	1724		1549	967.1	817.5	516	393.5	1181	1060	371
36	1101	324.5	1111	491.9	696	682.6	1067	419.6	1933		1096	930.3	935.1	557.1	369.4	907	1261	374.3

## Sheet: FigS5_1D
Time (s)	wild type										flwr-1
0.5	1585	1369	1696	1103	1409	1568	1482				1907	1147	1268	2040	1044	907.5	1931
1	405.6	327.4	626.4	242.1	288.1	325.8	546.1				732.8	218.4	457.4	359.1	132.5	176.7	966.9
1.5	297.2	339.8	430.5	348.8	235.9	352.2	444.9				637.5	113.9	424.3	252.4	144.6	143.1	453
2	345.3	338.2	539.7	322.4	233.9	207.7	420.8				620.4	158.4	471.2	403.9	179.9	182.5	687.5
2.5	307.2	373.8	510.8	361.4	179.7	325.8	374.3				514	127.8	377.5	339.6	240.9	155.5	767.8
3	391.5	264.1	523.6	249	246	251.3	380.7				481.9	163.5	500.6	390.1	218.4	253	780.6
3.5	423.6	265.6	388.7	263.9	198.8	176.7	327.7				710.8	138	454.6	393.5	189.5	136.5	796.7
4	339.3	236.3	567	246.7	234.9	157.9	456.2				610.4	170.1	411.2	370.6	134.1	174.3	658.6
4.5	423.6	319.7	367.8	340.7	216.8	181.1	303.6				646.5	130	379.1	330.4	220.9	185.5	571.8
5	373.4	264.1	454.6	331.6	219.9	295.4	375.9				700.7	181.1	578.2	346.5	144.6	161.4	787.1
5.5	391.5	333.6	499.5	323.5	197.8	193.6	554.1				574.2	92.7	486.7	376.3	201.6	221.7	735.7
6	375.5	336.7	427.3	288	221.9	232.9	393.5				680.6	102.9	465.8	442.9	120.5	157.4	809.5
6.5	437.7	349	387.1	385.5	377.5	146.3	443.3				558.2	96.4	539.7	343	138.9	140.5	822.4
7	351.4	271.8	515.6	261.6	235.2	157.9	342.1				520	89.8	459.4	323.5	189.5	197.6	533.3
7.5	279.1	245.6	345.3	369.4	200.8	161.5	401.6				674.6	84.7	465.8	416.5	205.6	147	584.7
8	315.2	370.7	420.8	386.6	290.3	230.2	363				682.6	114.6	353.4	300.6	200	173.5	857.7
8.5	267	230.1	425.6	270.8	306.3	232	292.3				652.5	66.4	388.7	386.6	196	134.1	520.4
9	292.1	278	441.7	327	231.8	202.6	332.5				550.1	78.9	523.6	369.4	197.6	141.3	761.4
9.5	338.3	278	411.2	193.9	224.9	169.5	346.9				620.4	148.2	444.9	247.8	172.7	249.8	488.3
10	296.1	262.6	353.4	175.5	332.7	155.3	419.2				596.3	47.5	403.2	361.4	183.9	130.9	607.2
10.5	317.2	265.6	491.5	181.3	229.5	379.8	348.6				694.7	64.3	435.3	293.7	136.5	175.9	594.3
11	304.2	389.2	408	219.1	288	193.9	335.7				510	79.6	470.6	371.7	129.3	180.7	597.5
11.5	298.2	295	281.1	228.3	231.8	167.5	359.8				612.4	54	342.1	252.4	121.3	150.2	494.7
12	281.1	256.4	451.3	196.2	229.5	277.5	310				508	63.2	443.3	316.7	124.5	117.3	575
12.5	242.9	301.2	363	227.2	257	177.6	293.9				548.1	41.2	457.8	387.8	136.5	163	605
13	227.9	301.2	332.5	263.9	215.7	104.4	289.1				652.5	70.7	301.2	235.2	183.9	154.2	706.7
13.5	333.3	305.8	486.7	284.5	236.3	112.4	345.3				506	60.5	339.3	353.4	130.9	191.1	631.8
14	297.2	285.7	420.8	188.2	247.8	209.7	245.8				574.2	46.1	403.6	238.6	175.1	155.8	658.6
14.5	304.2	315.1	404.8	415.3	258.1	108.9	305.2				510	42.8	481.9	355.7	111.6	219.2	655.9
15	232.9	316.6	467.4	126.2	169.8	129.4	290.7				504	46.1	387.5	268.5	172.7	174.3	613
15.5	283.1	290.4	398.3	214.5	263.9	110.7	257				564.2	43.9	427.7	321.2	156.6	141.3	578.2
16	262	296.5	441.7	228.3	250.1	141.9	287.5				564.2	62.1	381.5	375.2	89.6	220.9	696
16.5	251	330.5	472.2	176.7	268.5	141.9	232.9				526	43.9	365.4	304	115.6	155.8	610.4
17	312.2	194.6	480.3	268.5	235.2	120.5	231.3				620.4	51.9	431.7	220.3	141.3	118.1	808.5
17.5	262	295	515.6	239.8	236.3	106.2	252.2				475.8	45	407.6	400.4	94.8	122.1	551.5
18	205.8	287.3	380.7	253.6	228.3	135.6	249				461.8	48.2	311.2	289.1	146.2	171.9	594.3
18.5	205.8	253.3	427.3	200.8	258.1	117.8	282.7				357.4	51.4	403.6	251.3	112.4	118.1	671.9

## Sheet: FigS5_1F+G
time (s)	wild type										flwr-1
1	25.03	101.57	80.03	45.4	40.17	46.97	120.07	39.3	87.8		8.23333	61.4667	53.9	64.8667	87.4	21.0333	27.2	45.5333
2	98	165	140	143	157	153	167	122	146		57	133	137	124	144	100	128	120
3	100	139	146	142	146	180	145	120	157		51	140	142	124	138	108	127	129
4	99	152	129	130	148	179	144	125	163		47	115	126	98	142	88	137	96
5	94	143	133	129	150	169	131	116	156		50	111	135	108	142	83	117	87
6	90	150	129	127	151	153	138	103	149		41	113	124	101	136	77	128	94
7	92	155	115	132	125	167	138	103	149		43	108	117	95	129	85	117	71
8	88	157	123	140	126	158	132	110	140		39	95	112	89	140	63	121	77
9	80	163	113	126	130	160	130	105	142		21	104	109	94	140	73	113	60
10	80	152	114	140	130	149	127	101	139		54	104	96	91	146	72	109	63
11	74	156	110	131	143	142	120	105	132		32	87	98	87	140	64	107	62
12	77	146	108	137	120	147	128	92	127		31	84	98	85	127	66	100	50
13	78	150	108	127	124	159	130	96	146		28	86	97	86	117	66	85	55
14	66	156	115	128	125	144	130	96	126		18	81	77	73	106	64	81	56
15	58	151	113	126	131	162	129	89	131		18	67	84	71	114	65	75	48
16	53	151	105	128	121	153	118	98	127		17	75	75	85	106	66	83	36
17	55	137	95	127	122	148	127	82	131		21	70	66	70	104	59	79	47
18	39	133	97	120	114	149	127	78	127		16	61	77	75	96	71	70	31
19	45	146	96	106	120	157	115	82	135		9	65	70	63	98	75	80	37
20	40	154	97	122	113	155	119	74	126		11	51	65	67	88	68	59	26
21	51	135	87	119	116	155	121	76	136		8	48	64	73	95	80	72	24
22	41	131	83	111	106	144	114	80	121		3	47	57	68	100	85	59	32
23	41	138	90	120	101	134	125	76	121		3	65	64	69	85	96	70	19
24	37	132	71	130	106	144	103	75	130		6	48	59	59	90	82	77	23
25	41	132	84	124	94	142	94	67	114		6	49	58	62	92	84	85	23
26	40	141	64	110	99	126	93	57	113		3	57	55	62	94	101	80	29
27	41	146	74	112	105	134	85	64	122		6	41	62	65	77	91	88	30
28	31	140	73	110	99	138	90	50	129		5	40	51	55	71	99	79	21
29	31	121	71	106	103	113	81	52	120		6	43	54	62	73	101	83	18
30	31	146	61	98	103	116	86	52	113		4	46	56	60	75	92	75	27
31	33	134	58	97	86	125	81	52	126		2	46	72	58	76	103	77	22
32	7	97	5	65	45	104	74	21	89		1	39	21	49	35	86	74	6
33	6	84	12	81	43	104	85	32	87		3	27	24	38	40	91	48	15
34	5	92	43	76	52	102	65	27	83		4	38	22	49	60	107	61	12
35	5	91	21	80	44	96	67	34	76		2	35	29	47	62	97	72	8
36	9	90	18	58	34	89	76	37	89		3	38	23	50	62	108	78	15
37	7	100	19	66	46	106	83	30	99		2	32	23	51	56	110	67	5
38	2	91	23	57	47	76	79	25	66		0	37	22	36	51	122	64	10
39	5	102	26	58	65	70	94	34	82		1	25	24	47	54	119	60	4
40	3	85	20	80	59	67	97	40	75		2	34	29	39	50	102	64	4
41	5	90	17	83	38	57	85	34	86		0	38	30	41	47	110	58	10
mPSC frequency during stimulation
wild type	flwr-1
60.8	21.8667
145.067	76
100.067	85.2333
123.267	79.3
120.467	109.367
148.5	80.9
118.933	92.0333
86.6	50.4333
133.133

## Sheet: FigS5_1H
	wildtype															flwr-1
Peak 1	1140	2002	1482	3895	1573	752.9	1471	3502								714.8	1067	1221	742.9	2353	1470	1526	1594
Peak 2	620	562.2	539.7	763	242.1	144.6	444.4	1359								62.2	161.5	501.3	81.2	1112	63.7	189.4	157.6
