# Supplementary material for: Flower/FLWR-1 regulates neuronal activity via the plasma membrane Ca2+ ATPase to promote recycling of synaptic vesicles
Source: eLife. 2025 May 20;13:RP103870. doi: 10.7554/eLife.103870 (PMC12092002; doi:10.7554/eLife.103870)
Supplement: Figure 5—source data 1. [file elife-103870-fig5-data1.xlsx]

## Sheet: Fig5B
wild type	-	+CCs
1.4336	0.657458	0.565128
1.48022	0.486571	0.977633
0.785615	0.163387	0.857477
0.531468	0.204956	0.220207
0.801271	0.594127	0.127839
0.600922	0.619577	0.885881
1.61364	0.792879	0.38622
1.15003	0.591956	0.760419
0.816205	1.22035	0.811504
0.787734	0.784488	0.331708
1.29087	0.575037	0.253982
0.501697	0.792164	1.00491
0.984966	0.378868	0.779822
1.29363	0.37584	1.13602
0.823074	0.382929	0.74723
1.61427	0.864071	0.70721
0.924854	0.59696	0.527218
0.56594	0.774495	1.94239
0.305696	0.679084	1.73397
0.359401	0.395189	0.99689
0.982423	0.696869	1.07455
1.14241	1.90289	0.477611
1.07554	0.707532	1.16378
0.479584	1.93843	0.330991
1.70629	0.635265	1.02228
0.268702	0.807085	0.57469
2.33214	0.52492	0.43669
1.34782	0.652224	0.797985
1.65925	0.43447	0.357941
0.819373	0.503821	2.42365
0.401009	0.467988	0.636564
2.75941	0.407207	0.580529
0.575297	0.185727	0.878362
1.61537	0.414298	0.460782
0.449279	1.40559	0.286323
1.00498	0.998214	0.554786
0.493654	0.903791	0.409631
0.603216	1.15411
1.65093	0.583378	0.775082
0.574943	0.527454	0.900837
0.393286	0.793528	1.20167
	1.90296	1.28902
0.407968	0.271775	1.25756
0.582485	0.557895	1.30317
1.67853	1.1549	0.874477
0.703628	0.915104	1.01259
0.754425	0.760065	0.981538
1.40205	1.30405	1.27355
1.11922	0.470461	0.991741
1.41824	0.492183	0.877385
1.23822	0.428028	0.4533
0.931789	0.107937	1.40478
0.953681	0.295444	0.930303
0.502124	1.07688	1.00562
0.69691	1.49977	0.656028
1.20738	0.471558	3.65856
1.38724	1.25823	0.827907
1.07887	0.420922	1.02202
1.13138	0.145174	0.963283
1.02105		0.541157
1.64172	1.21386	1.01497
0.638505	1.05119	1.22094
0.504591	0.817979	1.74554
1.24803	0.841604
0.880655	0.811537	0.325274
0.487258	0.889534	0.273367
0.97756	0.746656	0.598058
1.14251	1.87245	0.59812
1.4563	0.660712	1.19399
0.795655	2.41158	0.535293
2.07476	0.364155	0.700134
0.487134	0.98075	1.0496
0.69049	0.477293	0.405108
0.162231	0.870784	0.541638
1.00678	0.30911	0.663668
1.16081	1.61724	0.364881
1.42982	0.674771	1.31835
0.741568	0.917841	0.564884
0.698732	0.416834	0.553052
1.31108	2.74695	0.661371
0.750824	0.937467	0.421772
0.979992	0.308468	0.609806
0.613649	0.797951	0.601615
0.426285	0.738393	1.29303
0.529437	2.26704	0.628201
0.423862	2.06692	0.632106
0.568497	0.825657	0.506228
1.49065	1.61884	1.37233
0.755473	0.807014	1.49031
1.15436	0.53132	1.58382
4.2593	0.331875	2.28326
0.415044	0.331185	1.63665
1.14079	0.560708	1.61437
0.614539	0.398802	1.13733
0.863781	0.275918	0.552492
1.26213	0.847224	0.460565
	1.07832	0.690483
0.27841	1.24359	1.31745
0.289775	0.486346	0.965624
1.35883	0.492928	0.514916
1.88891	1.26468	2.19195
1.2098	2.24496	0.868823
2.24316	0.82231	2.04303
1.20797	1.24261	2.54248
0.515684	0.383818	1.33535
0.761322	0.228411	1.58558
0.874673	1.25828	1.02935
0.49858	1.55881	1.67234
0.632449	0.620191	1.54487
0.853467	0.376271	0.507172
0.943052	1.06209	0.435563
2.31888	0.44491	0.708614
0.692248	0.599237	0.743968
0.495627	0.42263	0.990397
0.723868	0.950821	0.577971
1.2133	0.957922
0.516347	0.597746
0.441145	0.241206
0.239116	1.68823
0.348667	0.580729
0.937121	0.202721
1.52751	0.892757
1.1427	0.299958
0.910603
0.462754	0.416711
1.15752	0.396662
2.14771	0.283123
2.29777	0.204718
0.555981	0.274672
0.819113	0.383224
0.823235	0.321879
0.908928	0.4008
0.53202	0.729051
1.11629	0.845182
1.63927	0.358561
1.47621	0.71938
0.67905	0.477375
2.05063	0.641593
1.26934	0.777424
0.653715	0.305748
1.13809	1.04039
1.0758	0.303018
0.635011	0.664501
0.390945	0.59879
0.229728	0.960376
1.03963	1.08083
1.05814	0.615159
0.598941	1.01991
0.477883	0.243738
1.84545	0.898013
0.78073	0.499807
2.19502	0.764213
1.79509	0.600554
0.595241	0.532712
1.17128	1.37709
0.384345	1.10132
0.5988	1.23668
0.436615	0.809917
0.755829	0.183277
2.14471	0.764141
	0.349777
	0.835287
	0.811994
	1.56613
	0.547227
	0.213505
	0.274208
	0.48187
	0.449186
	0.711293
	0.217122
	0.395006
	0.331098
	1.32038
	0.613361
	1.22729
	1.15615
	0.539397
	0.603172
	0.215061
	0.434865
	0.467228
	1.11401
	0.925509
	1.29123
	0.253876
	0.292729

## Sheet: Fig5C
Time (s)	wild type
0.2	-0.00028	-0.02443	0.012243	-0.03105	-0.03812	-0.00509	-0.02756	0.027668	-0.01798	-0.00641	-0.02553	-0.01693	-0.00165	-0.00414	-0.04165	-0.02509	0.019447	-0.04937	-0.01042	-0.01733	-0.00524	0.000282	-0.01474	-0.0168	-0.01536	-0.00136	-0.00529
0.4	-0.00428	-0.02416	0.014142	-0.02625	-0.03404	0.006147	-0.02109	0.041272	-0.0143	0.002861	-0.00798	-0.01729	0.002851	0.0041	-0.03446	-0.02862	0.019512	-0.05688	-0.00319	-0.01748	-0.01077	-0.00805	-0.00857	-0.01415	-0.01061	-0.00353	-0.00374
0.6	0.003735	-0.02214	0.019411	-0.01933	-0.03497	0.002405	-0.02881	0.036941	-0.00833	-0.00163	-0.03373	-0.01183	8.01e-06	0.006867	-0.03846	-0.01954	0.021322	-0.04192	0.00013	-0.01474	-0.00257	-0.00878	-0.00284	-0.0203	-0.00096	0.004336	-0.0126
0.8	0.00207	-0.0231	0.017696	-0.01052	-0.03448	-0.00302	-0.0127	0.032114	-0.00649	-0.00449	-0.03659	-0.01337	-0.00189	0.009838	-0.03705	-0.02215	0.018691	-0.04781	-0.00073	-0.0139	-0.01013	0.010047	0.000926	-0.01394	0.009829	0.011039	-0.01085
1	0.000799	-0.02795	0.014427	-0.01636	-0.02163	0.001587	-0.01218	0.032512	-0.01347	-0.00314	-0.02371	-0.014	-0.00135	0.013138	-0.0317	-0.02033	0.013776	-0.0476	-0.0078	-0.01044	-0.00125	0.001807	0.002731	-0.01426	-0.00385	0.006736	-0.00902
1.2	-0.00927	-0.02168	0.015222	-0.01769	-0.02498	0.001937	-0.02115	0.024393	-0.00894	0.001009	-0.0283	-0.01227	0.000744	0.012962	-0.02861	-0.01725	0.020683	-0.04844	0.001803	-0.00894	-0.00219	-0.01186	-0.00906	-0.01382	-0.01913	0.008199	-0.01018
1.4	-0.00611	-0.01411	0.02021	-0.01239	-0.01986	0.003165	-0.0059	0.030926	-0.01099	-0.00307	-0.02949	-0.00615	-0.00307	0.018986	-0.03225	-0.01622	0.017925	-0.03333	-0.0049	-0.00999	0.000466	-0.01134	0.002186	-0.01533	-0.0008	0.005327	-0.00523
1.6	-0.00052	-0.01495	0.014172	0.00094	-0.02069	-0.00338	-0.01986	0.01448	-0.00453	0.003484	-0.02581	-0.0031	-0.00019	0.01199	-0.02851	-0.01049	0.013571	-0.02616	0.004586	-0.0063	-0.00912	-0.01193	0.001522	-0.00732	-0.01927	0.006962	-0.00206
1.8	0.005525	-0.01807	0.013522	-0.00917	-0.02158	0.005115	-0.00679	0.025667	-0.00933	-0.003	-0.02466	-0.00768	0.00264	0.005511	-0.03076	-0.00873	0.013131	-0.03426	0.002105	-0.01729	-0.00021	-0.00172	0.005161	-0.01271	-0.00854	0.003445	-0.00374
2	-0.00218	-0.01328	0.016471	-0.00725	-0.0138	-0.00014	-0.0151	0.027933	-0.01453	0.003168	-0.01283	-0.00738	-0.00366	0.003204	-0.02272	-0.01379	0.014149	-0.03618	0.006826	-0.01097	-0.00256	-0.01393	-0.00839	-0.00131	-0.01126	-0.00583	-0.00175
2.2	0.001897	-0.01217	0.013361	-0.0155	-0.01084	-0.0018	-0.01094	0.013459	-0.0115	0.001445	-0.01894	-0.00902	-0.00074	0.008328	-0.01456	-0.01607	0.011736	-0.02476	0.002099	-0.00689	-0.01338	-0.02163	-0.00965	-0.00864	-0.02124	0.002995	-0.00067
2.4	-0.00153	-0.00487	0.018357	-0.00479	-0.0112	-0.00036	-0.00846	0.023879	-0.00963	0.000106	-0.01932	-0.00453	0.001003	0.005225	-0.01234	-0.01495	0.015998	-0.02585	0.005941	-0.0052	-0.01323	-0.00933	-0.00118	-0.00943	-0.01825	-0.0008	-0.0074
2.6	-0.0037	-0.00715	0.017131	-0.01928	-0.00555	0.002864	-0.01624	0.012455	-0.00235	-0.00263	-0.01593	-0.00744	0.003097	-0.0001	-0.01019	-0.00439	0.012187	-0.02319	-0.00073	-0.00014	-0.00589	-0.00526	-0.00349	-0.00296	-0.0083	0.007118	0.001967
2.8	-0.0041	0.00082	0.015406	-0.02031	-0.01388	-0.00471	0.008633	0.009803	-0.01435	-0.00591	-0.01603	-0.00262	0.005737	-0.00252	-0.008	-0.00889	0.007418	-0.02752	0.007343	-0.00678	-0.0036	0.000692	-0.00225	-0.00983	-0.01554	0.004498	-0.00342
3	-0.00207	-0.00388	0.021689	-0.02066	-0.01231	-0.00722	-0.01043	0.024081	-0.01424	0.00419	-0.0089	0.000447	0.002252	0.001255	-0.01003	-0.0091	0.010613	-0.03297	0.004159	-0.0003	-0.00533	0.001888	-0.00269	-0.00906	-0.01619	0.004101	0.004206
3.2	-0.00196	-0.00447	0.025505	-0.01246	-0.00698	-0.00679	-0.00801	0.023407	-3.9e-06	0.000976	0.020179	-0.00684	0.00586	0.007883	-0.00524	-0.00334	0.011412	-0.02392	-7.8e-05	-0.00687	-0.00632	0.000304	0.002502	-0.0054	-0.01346	-0.00215	0.008388
3.4	0.004555	-0.00272	0.023957	-0.01133	-0.00042	-0.00513	-0.01198	-0.00309	0.000251	-0.00642	0.023911	-0.0063	0.00558	0.00796	-0.00874	-0.00222	0.015968	-0.02228	0.003247	-0.00777	-0.00154	0.012939	-0.00081	-0.00075	0.001853	0.002419	0.01057
3.6	0.005771	-0.00567	0.022124	-0.01222	-0.00116	-0.00171	-0.00752	-0.0004	-0.00077	-0.00065	0.004865	-0.00444	0.002648	0.012567	-0.00436	-0.00942	0.019827	-0.01391	0.006631	0.004191	0.004321	-0.0009	0.002985	-0.00049	-0.0056	0.001408	0.003449
3.8	0.008157	-0.00011	0.025707	-0.01811	-0.00339	-0.00461	-0.00466	0.007796	-0.00974	-0.00054	-0.02319	-0.00864	-0.00354	-0.00522	-0.00642	-0.00879	0.012748	-0.01491	0.009306	0.006786	-0.00011	0.003931	0.004856	0.001203	-0.0154	0.0011	0.009431
4	0.01947	0.000105	0.022451	-0.00459	-0.00355	-1e-05	-0.01243	0.006521	-0.00892	-0.00237	-0.01338	-0.00581	0.001111	0.000184	-0.00925	0.000959	0.010608	-0.01513	0.006567	0.002294	0.004654	0.009848	-0.00363	-0.00025	0.001139	-0.01048	0.013427
4.2	0.018437	-0.00778	0.022408	-0.01173	-0.00088	-0.00098	-0.00828	-0.00098	-0.0083	-0.00812	-0.01194	-0.00365	-0.00309	-0.01209	-0.00194	-0.00704	0.012141	0.001081	0.007939	0.001042	0.002055	-0.00243	-0.0052	-0.00325	0.001644	-0.00851	0.006249
4.4	0.02169	-0.00171	0.020347	0.000268	0.001745	0.005833	-0.00661	-0.00182	-0.00585	0.00231	-0.00406	0.001447	-0.00389	-0.00472	-0.00515	-0.00115	0.009356	-8.8e-05	0.009785	-9.4e-05	-0.00511	-0.00046	0.006138	0.001061	0.014308	-0.00381	0.005236
4.6	0.021129	-0.00136	0.019932	-0.00852	0.003355	0.004961	-0.00015	0.004145	-0.00345	-0.00212	0.005826	-0.00238	-0.00068	-0.00484	-0.00133	-0.00497	0.002055	0.000235	0.008687	-0.00273	0.003917	0.008564	0.006573	0.000921	-0.00621	0.002349	0.002863
4.8	0.025307	-0.00463	0.024329	-0.00346	-6.5e-05	0.008289	0.005987	0.006746	0.001379	-0.00134	0.015731	-0.00549	-0.00323	-0.00715	-0.00226	0.002817	2.3e-05	0.001407	-0.0033	-0.00202	-0.00225	-0.0065	5.1e-05	-8.9e-05	0.001276	-0.00021	0.005716
5	0.015648	0.004775	0.02054	-0.00681	0.003136	0.007022	0.005897	-0.00168	0.006175	0.001378	0.00888	-0.00788	-0.0081	0.005846	-0.00256	-0.00503	0.000476	0.014311	0.005908	0.000428	-0.00064	-0.00259	0.006105	0.001389	0.008266	-0.00414	0.005522
5.2	0.018317	0.001313	0.012392	-0.00521	0.000709	0.007882	-0.00091	0.007646	-0.01029	-0.0067	0.002154	-0.00234	-0.00673	-0.00237	0.007573	0.003617	0.001685	0.009202	0.010167	0.00438	0.002063	-0.00205	0.007002	0.000217	0.017174	-0.00447	-0.00415
5.4	0.021328	-0.00265	0.015754	-0.00498	0.005579	0.009424	0.001599	-0.01135	0.007259	-0.00418	-0.00116	-0.00714	-0.00404	0.004632	0.000755	0.005582	-7.4e-05	0.005823	0.009976	0.00606	0.006453	0.007101	-0.00621	0.007366	0.002146	0.006744	3.6e-05
5.6	0.018938	0.001222	0.016934	0.005654	0.000342	0.007325	8.48e-05	-0.00918	0.0134	-0.00376	-0.00242	-0.00282	0.001278	0.004539	0.005787	0.007376	-0.0111	0.010685	0.018347	0.010816	0.003987	0.006749	0.001442	0.010383	0.022064	0.006703	-0.00069
5.8	0.02157	0.005655	0.013867	-0.01141	0.008504	0.005277	0.009349	0.001418	-0.00214	-0.00355	0.000127	0.004534	-2.3e-05	-0.00049	0.013298	0.006936	0.001467	0.016598	0.010396	0.002682	0.014097	-0.00155	0.004006	0.015637	0.008489	-0.0038	-0.00421
6	0.01185	0.006736	0.012968	0.004721	0.010505	0.010701	0.011569	-0.01618	0.004692	7.42e-05	0.015233	0.003366	-0.00062	-0.01083	0.004031	0.003578	-0.00436	0.001002	0.004606	0.00736	0.009177	-0.00229	0.001104	0.010552	0.00444	-0.00492	-0.00099
6.2	0.010691	0.003431	0.008191	0.011732	0.009388	0.004944	0.015447	-0.01697	0.001105	0.005975	0.007163	0.008508	-0.00372	-0.01056	0.011051	0.01592	-0.00956	0.018647	0.010012	0.003384	0.004372	0.008005	0.004082	0.015114	0.010572	-0.00073	-0.00118
6.4	0.013837	0.011117	0.006961	0.006966	0.010079	0.003739	0.006403	-0.0077	0.00139	-0.00012	0.00682	0.005189	0.000713	-0.00737	0.012605	0.008489	-0.00604	0.013885	0.007663	0.008342	0.00514	0.000177	0.009388	0.011166	0.023996	-0.00209	-0.00408
6.6	0.007446	0.011399	-0.00062	0.007075	0.011693	0.009005	0.002163	-0.00449	0.004687	0.002078	0.006566	0.010077	-0.00074	-0.00172	0.01036	0.00976	-0.00603	0.022173	0.009266	0.009196	0.003225	0.003757	0.008313	0.015552	0.011178	-0.00759	-0.00481
6.8	0.007716	0.01215	-0.00912	0.005426	0.012457	-0.00047	0.013813	-0.0036	0.007579	0.004772	0.010943	0.009365	-0.00119	-0.01369	0.012391	0.009221	-0.00576	0.022305	0.01029	0.00309	0.003206	-6.8e-05	0.003737	0.011496	0.008771	-0.00423	0.00032
7	0.005053	0.013872	-0.00938	0.015662	0.0134	0.000114	0.009036	-0.01207	0.006565	-0.0046	0.012361	0.008992	0.00311	-0.01584	0.016559	0.008266	-0.00883	0.0121	0.003783	0.005042	-0.00068	-0.00207	0.007369	0.010275	0.010044	-0.00108	-0.00337
7.2	-0.00368	0.016259	-0.01506	0.012786	0.013457	-0.00281	0.012323	-0.00472	0.004697	3.11e-05	0.002767	0.009699	0.009544	-0.00746	0.019417	0.015958	-0.01547	0.019931	0.002972	0.019914	0.005654	-0.01091	0.001449	0.013423	0.019479	-0.00369	-0.00063
7.4	-0.00121	0.018344	-0.01728	0.021867	0.016605	0.004561	0.0135	-0.00899	0.01519	0.00031	0.005198	0.013009	0.008235	-0.00607	0.014735	0.011208	-0.01889	0.03155	-0.00287	0.013206	0.001608	0.008708	-0.00315	0.007253	0.021748	-0.00389	-0.00471
7.6	-0.00522	0.019178	-0.02419	0.022089	0.014967	0.000226	0.013255	-0.01841	0.005169	0.00392	0.003141	0.007492	0.002759	-0.00652	0.013786	0.012254	-0.01545	0.030487	-0.01713	0.005762	0.00265	0.007028	-0.00131	0.011113	0.010633	-0.00727	0.005359
7.8	-0.01743	0.014891	-0.03139	0.02204	0.016141	-0.01014	0.002852	-0.03114	0.017017	0.005866	0.016153	0.013529	0.004611	-0.00373	0.017904	0.010191	-0.01708	0.032559	-0.02077	0.007728	0.007798	0.00688	-0.00348	0.008873	-0.0017	-0.01136	0.006215
8	-0.01367	0.011833	-0.03998	0.007734	0.012097	-0.00622	0.005866	-0.0173	0.016873	-0.00167	0.011484	0.015066	-0.00052	-0.00202	0.021056	0.007613	-0.01667	0.037555	-0.02369	0.006372	0.006113	0.004595	-0.00122	0.008249	0.007375	-0.00963	0.001047
8.2	-0.0211	0.015395	-0.03522	0.025618	0.010371	-0.00774	0.015341	-0.02666	0.00977	0.002406	0.012076	0.009274	-0.00251	-0.00309	0.017242	0.015237	-0.01617	0.031026	-0.02516	0.004438	0.008236	0.007398	-0.01038	0.007728	-0.00154	0.0033	0.006457
8.4	-0.0221	0.01698	-0.03806	0.016196	0.015517	-0.00241	0.021621	-0.02349	0.010971	0.000868	0.017827	0.008187	0.000613	0.003215	0.021616	0.011688	-0.02134	0.040203	-0.02472	0.002452	0.008293	-3.8e-05	0.001845	0.009828	0.004524	-0.00742	0.005865
8.6	-0.02264	0.01182	-0.04007	0.014714	0.017882	-0.00527	0.018765	-0.04152	0.014859	-0.00048	0.013542	0.012272	0.002002	-0.00935	0.023538	0.010158	-0.0193	0.031375	-0.02307	0.003734	-0.00262	0.005019	0.008277	0.002769	-0.01109	-0.0053	-0.00202
8.8	-0.02651	0.012415	-0.04146	0.020343	0.021751	-0.00568	0.018672	-0.03232	0.014043	0.001672	0.022805	0.006034	-0.00123	-0.00305	0.021602	0.016163	-0.0218	0.032607	-0.01865	0.004611	-0.00325	0.012061	-0.00252	0.001523	-0.00368	-0.00339	-0.00124
9	-0.01793	0.010678	-0.05055	0.018064	0.016883	-0.00444	0.019519	-0.03194	0.018104	0.004061	0.031062	0.008387	-0.00035	0.004973	0.026705	0.017899	-0.02811	0.041126	-0.01761	0.002558	0.000103	0.006516	-0.00051	-0.0012	0.005273	0.005472	-0.00154
9.2	-0.02137	0.011858	-0.0497	0.02718	0.018584	-0.00615	0.011614	-0.02174	0.013525	0.003237	0.017355	0.012296	-6.2e-05	-0.00051	0.029428	0.013634	-0.02252	0.043756	0.000676	0.009437	-0.00318	0.002587	-0.00794	-0.00018	0.003112	0.006628	0.000171
9.4	-0.02294	0.010432	-0.05504	0.028951	0.013053	-0.0031	0.011817	-0.02942	0.006782	0.005322	0.021195	0.005647	0.001811	-0.00502	0.033145	0.013854	-0.01922	0.043665	0.00301	0.008323	-0.00147	0.000897	0.005753	-0.00334	-0.00585	0.003944	-0.00107
9.6	-0.029	0.012036	-0.05433	0.024607	0.026916	-0.00616	0.017533	-0.03691	0.007772	0.010282	0.029363	0.007898	-0.00881	-0.00961	0.0384	0.018322	-0.02597	0.042659	0.002924	0.002717	-0.00015	0.002022	0.004816	0.001947	0.00645	0.00823	0.002312
9.8	-0.03013	0.008338	-0.04636	0.020747	0.029227	-0.00697	0.005099	-0.02119	0.001194	0.00511	0.039161	0.016622	-0.00259	0.006873	0.035547	0.02086	-0.01819	0.038526	0.007657	-0.00016	0.005194	-0.00411	-0.00111	-0.00022	-0.00194	0.008621	0.005833
10	-0.0303	0.010311	-0.05693	0.026645	0.031348	-0.00841	0.012109	-0.03555	0.026639	0.00517	0.017935	0.01306	-0.00029	-0.0071	0.032013	0.01997	-0.01682	0.038611	0.005239	-0.0029	0.003451	-0.00967	0.00316	0.005708	0.002723	0.014049	-0.00706
10.2	-0.01748	0.012231	-0.05487	0.026259	0.029452	-0.0112	0.01234	-0.01728	0.013709	0.007885	0.024724	0.021934	7.99e-05	0.01182	0.032772	0.021212	-0.00778	0.042447	0.009597	0.003553	-0.00389	-0.00325	0.00162	0.016208	-0.00815	0.005116	0.001129
10.4	0.006057	0.046813	-0.0436	0.060795	0.041602	0.000502	0.030239	-0.00075	0.015361	0.01564	0.046053	0.046301	0.007213	0.061207	0.055532	0.042204	0.011968	0.050498	0.020622	0.013139	0.004295	0.007693	0.019585	0.041225	0.01063	0.03516	0.006684
10.6	0.030809	0.075996	-0.02725	0.063355	0.056022	0.015477	0.033601	-0.00658	0.025376	0.024305	0.058629	0.065508	0.023049	0.101578	0.0734	0.054779	0.018294	0.059484	0.013531	0.025907	0.019952	0.014989	0.037721	0.052407	0.010174	0.037015	0.020976
10.8	0.042739	0.098729	-0.02305	0.081242	0.072107	0.028246	0.039527	0.016498	0.03349	0.038202	0.07034	0.071418	0.03421	0.133646	0.07285	0.072416	0.027527	0.069115	0.023872	0.039814	0.021508	0.027507	0.062133	0.070539	0.027563	0.051525	0.025771
11	0.067709	0.122098	-0.01685	0.08835	0.082929	0.037548	0.042363	0.002456	0.035516	0.047253	0.080358	0.078085	0.04779	0.159718	0.084049	0.084029	0.037499	0.074924	0.032068	0.049954	0.029024	0.033833	0.081152	0.090577	0.017319	0.059181	0.02457
11.2	0.07071	0.143572	-0.00486	0.100366	0.086558	0.050011	0.054518	0.020858	0.039542	0.057807	0.089113	0.088562	0.061594	0.198809	0.096458	0.088735	0.053874	0.088707	0.046497	0.04726	0.038596	0.04105	0.077248	0.105185	0.028503	0.070744	0.032217
11.4	0.082362	0.160152	0.007853	0.120908	0.095833	0.053372	0.063328	0.014647	0.051723	0.064683	0.096893	0.102373	0.072137	0.208254	0.107535	0.096347	0.065479	0.106788	0.057337	0.064807	0.044344	0.054515	0.100965	0.133594	0.024779	0.077798	0.042712
11.6	0.082807	0.17722	0.012142	0.12509	0.101477	0.064581	0.061701	0.027184	0.061451	0.070369	0.118225	0.103208	0.08622	0.242765	0.115022	0.11135	0.069424	0.114601	0.052641	0.065109	0.050674	0.062869	0.106863	0.143687	0.039107	0.069394	0.048271
11.8	0.103421	0.181926	0.025039	0.117503	0.106204	0.068518	0.061831	0.022167	0.056747	0.076279	0.12395	0.100027	0.092409	0.258064	0.110912	0.114681	0.069675	0.132876	0.06775	0.068522	0.050175	0.072277	0.133708	0.159353	0.043774	0.0758	0.053784
12	0.095678	0.202972	0.022827	0.146403	0.112197	0.082524	0.065985	0.021359	0.059369	0.08755	0.11009	0.126725	0.108064	0.280319	0.123634	0.12365	0.083523	0.136851	0.067033	0.080564	0.050267	0.073921	0.142206	0.164421	0.046965	0.075875	0.056202
12.2	0.108142	0.217835	0.033251	0.144663	0.122465	0.081308	0.064991	0.033671	0.056834	0.085983	0.119672	0.132763	0.121795	0.276832	0.120642	0.125461	0.08836	0.148307	0.072523	0.081105	0.055713	0.074061	0.148841	0.178117	0.051191	0.094947	0.057265
12.4	0.107463	0.231138	0.028286	0.159804	0.126451	0.091902	0.062489	0.026313	0.065746	0.092361	0.126889	0.138111	0.131163	0.301592	0.127202	0.128334	0.094446	0.151169	0.065771	0.085795	0.060751	0.072968	0.175035	0.190122	0.05931	0.096243	0.053415
12.6	0.102645	0.243135	0.036121	0.158073	0.125792	0.106232	0.05297	0.023274	0.071594	0.087903	0.147945	0.138078	0.135277	0.321409	0.127506	0.136449	0.101527	0.157181	0.079319	0.079994	0.05959	0.07669	0.174679	0.199477	0.056351	0.09725	0.059246
12.8	0.107872	0.242212	0.039133	0.167471	0.124772	0.104257	0.067493	0.018453	0.062801	0.093698	0.160813	0.139323	0.14905	0.31371	0.128582	0.140101	0.109972	0.165037	0.068327	0.093236	0.064119	0.094339	0.169955	0.204115	0.069148	0.096305	0.063137
13	0.112005	0.252967	0.041214	0.167583	0.126972	0.111688	0.057867	0.030932	0.070656	0.100599	0.141101	0.136974	0.151856	0.309142	0.137929	0.143855	0.110355	0.177931	0.071827	0.094406	0.067453	0.08881	0.18885	0.20749	0.066608	0.109739	0.069064
13.2	0.112585	0.252015	0.040027	0.169849	0.125334	0.116933	0.054432	0.032218	0.070336	0.111668	0.145485	0.141371	0.1621	0.322979	0.136735	0.151101	0.120622	0.188038	0.076048	0.109768	0.066169	0.075663	0.183805	0.212402	0.071507	0.114678	0.069224
13.4	0.120388	0.264107	0.041737	0.186032	0.123511	0.11522	0.05914	0.028452	0.080652	0.099915	0.14685	0.143868	0.1571	0.356536	0.140853	0.156602	0.120266	0.191753	0.075472	0.114952	0.069015	0.079811	0.17481	0.209619	0.07649	0.122939	0.075035
13.6	0.11145	0.26062	0.046384	0.186294	0.131333	0.12491	0.059044	0.029392	0.080096	0.101163	0.150048	0.146167	0.163986	0.358123	0.144423	0.164743	0.123869	0.198241	0.08077	0.112201	0.063865	0.091648	0.190313	0.20801	0.085539	0.124396	0.068735
13.8	0.115987	0.270645	0.050265	0.185707	0.130546	0.12814	0.053011	0.026082	0.074164	0.100487	0.152997	0.147009	0.163073	0.36598	0.139512	0.164263	0.128179	0.198929	0.077693	0.108337	0.074643	0.083406	0.178351	0.212145	0.069122	0.128497	0.073077
14	0.119054	0.279386	0.043872	0.187752	0.143556	0.137289	0.052378	0.036134	0.066158	0.099144	0.161946	0.15451	0.173552	0.368726	0.13568	0.172417	0.130206	0.20813	0.071359	0.120666	0.069912	0.094857	0.184288	0.216687	0.083016	0.131956	0.074955
14.2	0.1186	0.279402	0.043903	0.183542	0.136788	0.146837	0.042453	0.032039	0.080747	0.101504	0.162916	0.16106	0.176304	0.3842	0.141158	0.178691	0.134494	0.210942	0.068727	0.118309	0.070295	0.082653	0.177748	0.212948	0.079321	0.135536	0.075426
14.4	0.117243	0.283803	0.05463	0.19269	0.142199	0.14025	0.043602	0.031284	0.083575	0.108654	0.161628	0.15995	0.174438	0.375442	0.15033	0.178657	0.136974	0.211665	0.067911	0.115335	0.075507	0.094787	0.169181	0.219461	0.07213	0.140657	0.08478
14.6	0.122967	0.288028	0.062485	0.186834	0.139716	0.146761	0.045416	0.023262	0.077645	0.104536	0.157601	0.176916	0.178398	0.376172	0.148513	0.179235	0.135466	0.220546	0.074142	0.118554	0.08073	0.091242	0.176038	0.224236	0.069943	0.137349	0.082288
14.8	0.120016	0.289857	0.058793	0.198437	0.140697	0.147248	0.034991	0.019554	0.085096	0.110749	0.164713	0.176191	0.186174	0.383662	0.14699	0.185576	0.142275	0.21056	0.071517	0.128279	0.075956	0.103497	0.17176	0.222087	0.076786	0.143767	0.080813
15	0.110294	0.290316	0.067587	0.206532	0.140208	0.15419	0.042845	0.013903	0.082393	0.110102	0.175148	0.178586	0.1934	0.387912	0.147782	0.184471	0.146207	0.210385	0.072456	0.132799	0.084071	0.104464	0.183486	0.226506	0.080748	0.136299	0.075369
15.2	0.113898	0.302184	0.068468	0.204439	0.137395	0.165245	0.02772	0.020137	0.076021	0.105928	0.175342	0.184935	0.198108	0.392546	0.14524	0.180464	0.143498	0.201472	0.0799	0.138788	0.077586	0.098051	0.1727	0.231291	0.065517	0.151129	0.082828
15.4	0.108994	0.302187	0.069873	0.200964	0.131477	0.159705	0.032176	0.005916	0.078068	0.110082	0.168294	0.18446	0.204556	0.40041	0.145122	0.18972	0.145071	0.20257	0.081579	0.136262	0.080437	0.11192	0.162822	0.236573	0.081464	0.143755	0.079489
15.6	0.111945	0.296102	0.065351	0.207246	0.133397	0.167812	0.022379	-0.00826	0.079538	0.101038	0.166007	0.187122	0.205383	0.407735	0.143559	0.190981	0.150388	0.187629	0.081132	0.141962	0.084537	0.108644	0.174436	0.241781	0.082387	0.13631	0.075664
15.8	0.11486	0.299755	0.077261	0.215052	0.134796	0.160936	0.026009	0.01185	0.073234	0.099749	0.16593	0.184478	0.21253	0.418492	0.149586	0.190082	0.157915	0.196411	0.084593	0.1484	0.082824	0.115384	0.167892	0.238087	0.068676	0.146626	0.07778
16	0.109623	0.307141	0.074747	0.21825	0.132766	0.164329	0.042683	0.013453	0.075669	0.101787	0.192756	0.186996	0.214985	0.405654	0.156323	0.1881	0.163655	0.195336	0.093282	0.146489	0.084161	0.116319	0.182912	0.243553	0.081659	0.141338	0.072846
16.2	0.107505	0.304467	0.072757	0.217551	0.131615	0.163052	0.016793	0.002041	0.080397	0.109701	0.176091	0.189588	0.216423	0.418393	0.15889	0.201401	0.164929	0.198033	0.087014	0.150472	0.083861	0.120372	0.170285	0.244581	0.084475	0.145202	0.080106
16.4	0.103405	0.309154	0.074056	0.21585	0.133251	0.16584	0.029272	0.001014	0.067367	0.099186	0.16804	0.198043	0.224624	0.427728	0.164075	0.18809	0.168217	0.192466	0.091464	0.14529	0.084727	0.121799	0.169544	0.248829	0.083497	0.15261	0.078555
16.6	0.104126	0.305475	0.073024	0.214098	0.129151	0.168497	0.029523	-0.00397	0.064675	0.100515	0.169523	0.197197	0.222488	0.424329	0.166472	0.199731	0.167318	0.195257	0.087639	0.149728	0.086675	0.124478	0.169541	0.248687	0.083068	0.152199	0.075915
16.8	0.107395	0.30536	0.079766	0.217068	0.133011	0.168579	0.029788	0.008522	0.057477	0.099776	0.168747	0.197839	0.228202	0.421545	0.175442	0.200912	0.176405	0.200235	0.092882	0.147067	0.085994	0.116628	0.168244	0.250843	0.055223	0.162348	0.076396
17	0.102026	0.304315	0.080492	0.228264	0.133502	0.170379	0.026763	0.003546	0.059562	0.09792	0.163422	0.20584	0.233784	0.42775	0.174875	0.20737	0.174356	0.207072	0.090725	0.145016	0.086497	0.130125	0.169221	0.253073	0.073578	0.165044	0.075371
17.2	0.100021	0.306263	0.077167	0.207561	0.131517	0.169757	0.017629	-0.0056	0.046119	0.101393	0.170165	0.203475	0.232895	0.42406	0.177908	0.203583	0.177125	0.207811	0.091618	0.148099	0.09319	0.127505	0.171476	0.253778	0.081838	0.172227	0.073207
17.4	0.108726	0.304522	0.079943	0.223025	0.133802	0.175281	0.032448	0.003603	0.055628	0.110682	0.170304	0.203345	0.234276	0.427898	0.17469	0.208089	0.181549	0.219768	0.096951	0.151965	0.087563	0.137581	0.172359	0.254833	0.089345	0.166277	0.070382
17.6	0.106687	0.310904	0.081856	0.226855	0.125239	0.170548	0.017044	0.00794	0.067237	0.1068	0.174551	0.206713	0.244263	0.421798	0.175403	0.210566	0.180526	0.216583	0.100652	0.148974	0.089967	0.132175	0.171146	0.251281	0.089435	0.17173	0.072196
17.8	0.100834	0.314861	0.085401	0.23207	0.126386	0.168777	0.021322	-0.00774	0.066158	0.119372	0.17594	0.20797	0.247854	0.433323	0.177234	0.207398	0.181241	0.223708	0.0909	0.162187	0.10001	0.133478	0.164983	0.254515	0.094082	0.160724	0.063844
18	0.102946	0.314836	0.084505	0.222186	0.137232	0.168737	0.016115	0.00444	0.054573	0.120797	0.176348	0.206113	0.248778	0.442422	0.176484	0.205871	0.194247	0.222207	0.103565	0.157684	0.091022	0.143996	0.167271	0.257884	0.077818	0.158533	0.065441
18.2	0.111678	0.32048	0.088733	0.229209	0.139085	0.175542	0.024633	0.004624	0.058596	0.114031	0.177447	0.209067	0.24707	0.446079	0.173072	0.21147	0.189745	0.239541	0.098838	0.160533	0.092595	0.141313	0.159129	0.256732	0.094705	0.15944	0.072107
18.4	0.106121	0.311758	0.086501	0.230539	0.139446	0.177283	0.023638	0.002871	0.060456	0.115057	0.185901	0.210201	0.246521	0.448495	0.174869	0.204518	0.194811	0.240052	0.09432	0.165969	0.088421	0.148345	0.160778	0.252075	0.096785	0.158689	0.070656
18.6	0.101295	0.314678	0.087301	0.22817	0.143002	0.174783	0.023366	0.001706	0.054117	0.115489	0.18306	0.21352	0.250056	0.442653	0.175061	0.203299	0.199445	0.241318	0.09816	0.166059	0.104561	0.151991	0.160197	0.248886	0.076525	0.152362	0.075602
18.8	0.106592	0.310753	0.092742	0.236216	0.138639	0.182634	0.023913	0.008961	0.062446	0.119322	0.183841	0.209343	0.255954	0.447106	0.173657	0.204748	0.196293	0.242782	0.091142	0.170819	0.102415	0.14932	0.160069	0.250603	0.077923	0.153786	0.06502
19	0.102674	0.315359	0.09673	0.236143	0.139181	0.184071	0.016649	0.021636	0.064477	0.112051	0.17756	0.206888	0.259584	0.44609	0.167915	0.207672	0.196849	0.241753	0.09648	0.164157	0.109458	0.158283	0.149349	0.248467	0.091709	0.158498	0.075451
19.2	0.101751	0.316263	0.100692	0.234339	0.14182	0.180834	0.015891	0.026371	0.060849	0.111146	0.180825	0.226283	0.262268	0.445124	0.175954	0.205965	0.19894	0.244971	0.097625	0.160377	0.103981	0.165488	0.143833	0.247483	0.089313	0.165242	0.069723
19.4	0.097117	0.319134	0.097268	0.239712	0.141565	0.18523	0.021195	0.027593	0.059374	0.109211	0.189036	0.224325	0.261093	0.440703	0.175482	0.204743	0.203469	0.239749	0.09913	0.168266	0.106996	0.151949	0.147214	0.250171	0.094209	0.170704	0.071505
19.6	0.093785	0.320369	0.097317	0.246367	0.1409	0.179302	0.017798	0.036849	0.058049	0.112568	0.188322	0.217707	0.263053	0.438672	0.175494	0.202828	0.201588	0.233516	0.09745	0.169346	0.105681	0.148399	0.143557	0.247405	0.082682	0.172747	0.074756
19.8	0.089048	0.321522	0.107198	0.241717	0.145214	0.178629	0.014687	0.03994	0.0624	0.101933	0.180554	0.220976	0.264359	0.447425	0.171861	0.205537	0.201531	0.236168	0.094083	0.171603	0.110379	0.14805	0.127857	0.256859	0.0961	0.164638	0.069428
20	0.083672	0.323514	0.108355	0.24285	0.143606	0.172937	0.014129	0.037858	0.065453	0.108144	0.175742	0.216832	0.264465	0.449011	0.167808	0.201929	0.201763	0.242118	0.088631	0.183252	0.105336	0.151661	0.148481	0.250462	0.091245	0.173235	0.074019
20.2	0.084021	0.327669	0.106137	0.23813	0.151549	0.17464	0.005835	0.040101	0.060253	0.109171	0.182813	0.211906	0.263912	0.443767	0.166105	0.200848	0.207944	0.240982	0.075809	0.18306	0.110173	0.142527	0.147689	0.253171	0.090998	0.170502	0.068454
20.4	0.083892	0.328946	0.104304	0.234342	0.151963	0.176231	0.01098	0.058405	0.063824	0.108848	0.190363	0.215979	0.267262	0.44933	0.171824	0.213753	0.200697	0.229796	0.072862	0.187745	0.110821	0.153225	0.146589	0.2511	0.102064	0.175894	0.06903
20.6	0.084781	0.324668	0.106024	0.234388	0.147673	0.169102	0.006035	0.040176	0.063314	0.108326	0.198184	0.216064	0.2625	0.460471	0.171738	0.199292	0.205928	0.234905	0.055218	0.182204	0.107502	0.14808	0.135001	0.245116	0.083613	0.176154	0.0686
20.8	0.087161	0.331039	0.113714	0.237999	0.145459	0.167496	-0.00434	0.052408	0.067768	0.104167	0.179917	0.213717	0.265666	0.442894	0.183714	0.205498	0.201415	0.232299	0.054438	0.180099	0.115015	0.158066	0.15167	0.24958	0.08891	0.171444	0.06852
21	0.081001	0.327443	0.114745	0.240979	0.146779	0.170111	0.002243	0.048925	0.064726	0.105635	0.171569	0.20204	0.263742	0.457462	0.177053	0.203438	0.211326	0.232951	0.056233	0.186691	0.104542	0.152144	0.142209	0.246851	0.097017	0.178224	0.069783
21.2	0.079853	0.330679	0.120659	0.253277	0.151196	0.17127	0.005416	0.044427	0.058781	0.107097	0.180401	0.199481	0.261864	0.454662	0.175752	0.206304	0.204851	0.232865	0.068735	0.182219	0.103152	0.152664	0.138407	0.245792	0.093487	0.1858	0.073802
21.4	0.081958	0.335106	0.122086	0.24702	0.143028	0.167304	0.017788	0.048498	0.052526	0.111266	0.18058	0.202825	0.258348	0.441538	0.183097	0.201098	0.218127	0.231135	0.071608	0.181104	0.103859	0.15259	0.15062	0.241171	0.091715	0.186081	0.068392
21.6	0.069609	0.333866	0.124382	0.235123	0.139114	0.160535	-0.01039	0.056139	0.051517	0.106535	0.1818	0.205701	0.26495	0.457869	0.174888	0.203531	0.219962	0.232929	0.072681	0.180046	0.104577	0.153142	0.145685	0.243472	0.077343	0.182308	0.065889
21.8	0.066907	0.335811	0.1209	0.244372	0.142982	0.165798	-0.00925	0.068174	0.05816	0.109014	0.179864	0.198711	0.263497	0.444948	0.17168	0.204751	0.214135	0.230076	0.079722	0.182581	0.111556	0.146553	0.136453	0.238038	0.103108	0.178642	0.07743
22	0.06952	0.331148	0.122433	0.235457	0.153254	0.164455	0.007267	0.051929	0.05794	0.112379	0.18076	0.197476	0.264831	0.44626	0.17769	0.202292	0.216345	0.223975	0.091771	0.176338	0.109097	0.142358	0.134696	0.23497	0.087448	0.185386	0.075158
22.2	0.066605	0.330664	0.117907	0.251033	0.150085	0.158059	0.013744	0.060331	0.056704	0.119811	0.184715	0.199422	0.26312	0.449215	0.181396	0.207773	0.216246	0.226239	0.09744	0.176113	0.109272	0.151032	0.127069	0.229137	0.089301	0.184142	0.070826
22.4	0.066118	0.331686	0.125653	0.2434	0.149041	0.153103	0.005367	0.060181	0.046773	0.12341	0.179886	0.208346	0.261029	0.462459	0.178432	0.203604	0.220345	0.221529	0.096079	0.174455	0.115845	0.150043	0.131714	0.229045	0.081975	0.179132	0.070743
22.6	0.071187	0.331831	0.122335	0.230655	0.143635	0.14995	-0.00409	0.070025	0.057308	0.122566	0.188411	0.208022	0.265086	0.450456	0.1733	0.210701	0.221449	0.22826	0.093615	0.185148	0.105706	0.154278	0.128478	0.226798	0.090856	0.181512	0.072864
22.8	0.06876	0.333931	0.122789	0.244274	0.140263	0.150873	0.004118	0.063347	0.057479	0.12258	0.190078	0.206321	0.263716	0.449967	0.174572	0.20555	0.214993	0.229025	0.098429	0.179475	0.11612	0.144422	0.124934	0.218952	0.086343	0.185213	0.072978
23	0.070016	0.328932	0.123002	0.251054	0.137934	0.148251	0.00184	0.072955	0.051474	0.125019	0.200415	0.207926	0.260491	0.449522	0.175047	0.206664	0.218909	0.232543	0.096343	0.182393	0.106609	0.145441	0.118866	0.219903	0.084658	0.182791	0.066909
23.2	0.061688	0.319282	0.124871	0.250137	0.139116	0.146017	0.003743	0.074281	0.059721	0.12533	0.17806	0.206829	0.273442	0.461356	0.17469	0.204403	0.221821	0.236476	0.101603	0.178912	0.111416	0.148687	0.128707	0.225481	0.083602	0.180283	0.073106
23.4	0.067297	0.321454	0.132245	0.247357	0.138207	0.139767	-0.00108	0.072534	0.048988	0.128802	0.188128	0.207589	0.269212	0.457221	0.174976	0.203969	0.223182	0.227084	0.108691	0.17443	0.115394	0.148076	0.133581	0.233296	0.082717	0.192925	0.064624
23.6	0.06785	0.323119	0.135998	0.25061	0.135365	0.136212	0.006837	0.084696	0.054527	0.123811	0.186885	0.215001	0.272319	0.458319	0.176832	0.210439	0.220869	0.226144	0.106147	0.174317	0.127377	0.153432	0.11458	0.22765	0.096295	0.18758	0.063586
23.8	0.067473	0.326592	0.134125	0.241902	0.14034	0.139308	0.00153	0.088277	0.049728	0.119216	0.195418	0.220003	0.272409	0.463157	0.174943	0.220752	0.225406	0.241687	0.114831	0.16967	0.119324	0.141396	0.122069	0.229737	0.093467	0.181505	0.065599
24	0.05984	0.322658	0.127757	0.242765	0.146751	0.145489	0.00037	0.097868	0.043126	0.122681	0.187575	0.224308	0.273547	0.465452	0.176822	0.208477	0.223457	0.239073	0.103083	0.170805	0.122483	0.143337	0.126336	0.227354	0.09123	0.172594	0.061001
24.2	0.057082	0.327821	0.13633	0.235603	0.139144	0.142998	-0.00281	0.110641	0.048256	0.121412	0.178973	0.221134	0.266593	0.463568	0.177529	0.21959	0.22777	0.23988	0.106775	0.168846	0.117829	0.142642	0.119461	0.227074	0.081775	0.170479	0.05541
24.4	0.054107	0.327381	0.131611	0.253982	0.135574	0.139491	0.003499	0.113178	0.039151	0.119983	0.18184	0.222273	0.270289	0.458736	0.175927	0.213215	0.223209	0.240384	0.101516	0.164382	0.121411	0.140158	0.11933	0.229277	0.095013	0.168809	0.065251
24.6	0.062553	0.328103	0.131561	0.252339	0.1399	0.140247	0.00313	0.115912	0.043712	0.119393	0.178523	0.219865	0.269924	0.457385	0.178306	0.212788	0.226871	0.233951	0.105378	0.171714	0.122973	0.148168	0.123779	0.231947	0.081661	0.163416	0.061454
24.8	0.054432	0.323557	0.137267	0.243397	0.138471	0.144199	0.004025	0.117002	0.035218	0.119683	0.18797	0.218315	0.270189	0.464815	0.177846	0.213867	0.223867	0.229816	0.106382	0.178838	0.120323	0.14405	0.133181	0.229106	0.088301	0.170077	0.06152
25	0.050188	0.32778	0.131806	0.248834	0.140058	0.136345	0.010729	0.111068	0.031099	0.126277	0.200611	0.223236	0.268465	0.451955	0.184489	0.215604	0.229138	0.236096	0.110575	0.179227	0.126167	0.160747	0.114776	0.224353	0.100561	0.17351	0.062554
25.2	0.048726	0.328217	0.133217	0.241744	0.137818	0.135778	0.002576	0.11447	0.030169	0.120192	0.186325	0.217563	0.270768	0.463656	0.184643	0.217504	0.229341	0.226977	0.106108	0.183034	0.123207	0.149087	0.121655	0.225084	0.088956	0.169919	0.05834
25.4	0.043035	0.328006	0.132453	0.253332	0.141082	0.13617	0.004521	0.121275	0.018842	0.116936	0.178664	0.221812	0.265292	0.467544	0.180491	0.209554	0.233734	0.221953	0.102832	0.171487	0.118816	0.14967	0.132204	0.225785	0.07747	0.167607	0.058953
25.6	0.044783	0.324354	0.141978	0.242482	0.143987	0.128634	-0.00205	0.132255	0.020585	0.111663	0.178257	0.219307	0.268988	0.452987	0.181207	0.21493	0.229462	0.227631	0.099318	0.178474	0.117068	0.154055	0.12306	0.224096	0.08855	0.180551	0.070615
25.8	0.036731	0.324915	0.139622	0.249672	0.149459	0.128275	-0.00292	0.137584	0.02848	0.119183	0.185843	0.216471	0.273403	0.464266	0.182823	0.206836	0.227068	0.224224	0.105043	0.174208	0.123124	0.150337	0.11681	0.22696	0.094621	0.177861	0.069057
26	0.038246	0.32879	0.134568	0.247773	0.151766	0.127637	-0.00246	0.128945	0.024937	0.11794	0.185242	0.216976	0.272154	0.447952	0.181396	0.213589	0.23218	0.219294	0.097587	0.176736	0.116282	0.145696	0.122101	0.219992	0.096855	0.181176	0.075225
26.2	0.036068	0.321198	0.136691	0.248463	0.158663	0.126267	-0.00555	0.136315	0.031029	0.117829	0.179644	0.219284	0.272362	0.449495	0.178659	0.216696	0.226096	0.224547	0.105058	0.17781	0.127156	0.146285	0.123728	0.217958	0.091387	0.184397	0.078226
26.4	0.044479	0.324983	0.131387	0.26067	0.156628	0.124714	0.00236	0.133356	0.031069	0.120666	0.182384	0.219862	0.276544	0.439347	0.179417	0.216993	0.223249	0.232559	0.098709	0.174245	0.125765	0.146088	0.109598	0.22053	0.093739	0.180901	0.074676
26.6	0.04969	0.327268	0.13015	0.269248	0.150996	0.120168	0.008286	0.147485	0.033312	0.1283	0.182789	0.216469	0.274511	0.456007	0.179184	0.217649	0.226634	0.234217	0.098933	0.173013	0.132003	0.151406	0.127716	0.216949	0.077023	0.182973	0.077988
26.8	0.042534	0.319328	0.130583	0.27142	0.155847	0.11635	-0.00678	0.138599	0.038067	0.132979	0.179543	0.211172	0.274416	0.450467	0.173368	0.224619	0.223689	0.231194	0.096885	0.17046	0.129821	0.134914	0.116694	0.215934	0.084751	0.189217	0.074586
27	0.041499	0.326521	0.13386	0.272601	0.15593	0.115667	0.004834	0.137474	0.027865	0.12769	0.182317	0.20383	0.272703	0.472025	0.178832	0.2194	0.232657	0.231389	0.094062	0.173633	0.117971	0.139308	0.108664	0.213039	0.100918	0.191356	0.069186
27.2	0.044356	0.326553	0.133966	0.264385	0.158661	0.117551	0.002033	0.15049	0.035575	0.129016	0.182434	0.205235	0.27084	0.458407	0.175224	0.217835	0.222445	0.236712	0.10084	0.172489	0.115996	0.136657	0.114351	0.211157	0.08263	0.187371	0.077899
27.4	0.043051	0.322292	0.133011	0.265469	0.155991	0.118741	0.002263	0.149186	0.036237	0.129355	0.174513	0.198107	0.277514	0.454794	0.177277	0.221111	0.230304	0.23881	0.093678	0.169669	0.123763	0.145984	0.105469	0.217414	0.091613	0.181354	0.074477
27.6	0.043884	0.319644	0.136379	0.257186	0.150596	0.114771	0.002205	0.145034	0.047207	0.127932	0.178757	0.21454	0.281762	0.463283	0.178601	0.216204	0.23765	0.243579	0.096529	0.168662	0.11377	0.148257	0.111653	0.213763	0.098972	0.187789	0.075469
27.8	0.040039	0.315073	0.137853	0.262529	0.154608	0.112592	-0.0025	0.140104	0.046512	0.125839	0.189827	0.207186	0.280291	0.461482	0.178729	0.226193	0.240419	0.23745	0.085903	0.17431	0.114315	0.13903	0.10605	0.221025	0.091984	0.18365	0.070302
28	0.033229	0.320982	0.143227	0.26532	0.154892	0.116092	0.013727	0.1362	0.041708	0.124646	0.176269	0.206735	0.271619	0.454277	0.194949	0.22904	0.238131	0.244248	0.087433	0.159772	0.115092	0.138892	0.104361	0.216269	0.077772	0.190301	0.068547
28.2	0.030773	0.321399	0.137009	0.266417	0.163293	0.117949	-0.00191	0.168615	0.031818	0.121067	0.176714	0.201525	0.277172	0.454102	0.188769	0.222845	0.23792	0.253131	0.092118	0.161437	0.117798	0.144378	0.116323	0.21574	0.090694	0.184332	0.069133
28.4	0.040634	0.314911	0.139106	0.271104	0.160447	0.114221	0.003368	0.16008	0.042532	0.127743	0.182698	0.20978	0.272164	0.449983	0.189204	0.220053	0.240247	0.256757	0.097482	0.160693	0.127071	0.153502	0.104888	0.219275	0.086546	0.1955	0.069284
28.6	0.032938	0.318767	0.142561	0.272865	0.16259	0.119515	0.003179	0.146603	0.040621	0.125166	0.181416	0.213203	0.276257	0.451389	0.193236	0.221963	0.238088	0.252787	0.096055	0.155958	0.128128	0.16148	0.112074	0.214972	0.092881	0.199538	0.071745
28.8	0.027667	0.317263	0.148111	0.267252	0.160538	0.113429	0.004376	0.161527	0.037978	0.127089	0.177157	0.211639	0.273221	0.459192	0.194152	0.229674	0.238841	0.248486	0.105384	0.158981	0.131543	0.162419	0.114874	0.219005	0.097295	0.194751	0.070995
29	0.031208	0.320613	0.140079	0.260938	0.16007	0.115439	-0.00204	0.159734	0.033612	0.127895	0.182149	0.207151	0.275413	0.448309	0.191663	0.228384	0.23537	0.255811	0.096452	0.165698	0.128351	0.15357	0.11502	0.21531	0.076774	0.1923	0.070078
29.2	0.02569	0.319	0.139171	0.272079	0.152792	0.118866	-0.00383	0.158356	0.031462	0.122414	0.180602	0.210291	0.27148	0.444569	0.189969	0.221357	0.238212	0.261265	0.099718	0.158803	0.131215	0.159535	0.113727	0.213442	0.080252	0.194837	0.064071
29.4	0.029989	0.314392	0.142481	0.280562	0.15338	0.112556	0.003812	0.151268	0.033119	0.121922	0.171921	0.210779	0.271919	0.448215	0.195065	0.217977	0.237912	0.251845	0.097681	0.161121	0.127664	0.157154	0.122152	0.213682	0.09476	0.201173	0.058267
29.6	0.028854	0.321286	0.141607	0.283964	0.150432	0.117064	-0.00397	0.154071	0.029391	0.124124	0.170108	0.204651	0.270683	0.45391	0.192832	0.22289	0.238957	0.255922	0.10256	0.163507	0.125841	0.149139	0.106674	0.209799	0.08355	0.201159	0.067708
29.8	0.02687	0.319942	0.139807	0.279037	0.162043	0.110525	-0.00021	0.160559	0.024752	0.129453	0.170829	0.209514	0.268512	0.460999	0.195026	0.216564	0.234436	0.253416	0.100636	0.162369	0.123168	0.158816	0.112975	0.205016	0.081815	0.201801	0.068252
30	0.028975	0.323104	0.143325	0.280811	0.156044	0.108	-0.00019	0.161712	0.024768	0.126225	0.177967	0.205739	0.265106	0.449231	0.18667	0.219576	0.236063	0.250515	0.112627	0.161477	0.11886	0.155815	0.10707	0.202018	0.103929	0.197626	0.072164
30.2	0.025255	0.322715	0.136312	0.269637	0.15768	0.109395	-0.01046	0.151499	0.033873	0.131556	0.178621	0.20891	0.266489	0.451461	0.193898	0.217338	0.236403	0.25343	0.100315	0.160818	0.128881	0.156072	0.104615	0.199646	0.09579	0.198421	0.072878
30.4	0.024862	0.324095	0.135129	0.283694	0.152161	0.109275	-0.0006	0.156441	0.025576	0.129317	0.181977	0.206992	0.272015	0.447908	0.185122	0.216232	0.233416	0.261842	0.103213	0.155239	0.127765	0.164274	0.0981	0.19754	0.104045	0.197575	0.068772
30.6	0.01368	0.322651	0.128216	0.284942	0.160475	0.11122	-0.00603	0.145305	0.014404	0.129799	0.185666	0.200622	0.270627	0.444509	0.189503	0.222589	0.233626	0.256476	0.10397	0.164625	0.132204	0.157473	0.10419	0.187341	0.095787	0.19219	0.073266
30.8	0.014511	0.324354	0.139772	0.276632	0.151194	0.10697	-0.01239	0.144417	0.016513	0.127717	0.197943	0.201335	0.266338	0.456716	0.186468	0.224412	0.233419	0.256562	0.106665	0.162645	0.124649	0.157714	0.103493	0.184891	0.104173	0.195342	0.07124
31	0.008563	0.324466	0.13343	0.284927	0.153935	0.105503	-0.00873	0.146868	0.011424	0.134293	0.191789	0.199057	0.268264	0.46616	0.186839	0.222061	0.228736	0.26531	0.094241	0.16129	0.124767	0.15429	0.103646	0.186353	0.099149	0.200205	0.068579
31.2	0.017158	0.324996	0.13479	0.27709	0.155823	0.106586	-0.00741	0.145392	0.013501	0.126835	0.164045	0.194785	0.270433	0.44939	0.191787	0.221331	0.230981	0.247988	0.091136	0.15554	0.126511	0.161478	0.103061	0.186174	0.103781	0.200278	0.061463
31.4	0.016524	0.322113	0.13989	0.275529	0.151229	0.11381	-0.01106	0.136978	0.014032	0.132732	0.162073	0.193208	0.264205	0.451197	0.190641	0.224833	0.229019	0.263926	0.092511	0.151281	0.126476	0.159839	0.092083	0.180729	0.114043	0.20499	0.063533
31.6	0.019643	0.320118	0.144501	0.274287	0.154939	0.103821	-0.0063	0.12966	0.009339	0.121864	0.169648	0.193928	0.269447	0.44832	0.189552	0.230336	0.224671	0.254346	0.094908	0.143662	0.127423	0.168319	0.098165	0.187951	0.120593	0.203218	0.058361
31.8	0.020946	0.323129	0.139756	0.269193	0.15306	0.101579	-0.01568	0.137837	0.010019	0.130875	0.166253	0.199287	0.264959	0.440725	0.195947	0.226395	0.23021	0.247416	0.106181	0.149181	0.128169	0.166957	0.098634	0.190564	0.117025	0.199531	0.061456
32	0.013936	0.326696	0.139122	0.277282	0.150602	0.100559	-0.00356	0.132163	0.012308	0.129054	0.170225	0.190779	0.265758	0.451197	0.195494	0.231548	0.221476	0.252864	0.092857	0.140356	0.117507	0.162081	0.097781	0.1917	0.101414	0.196357	0.060719
32.2	0.011436	0.335129	0.143951	0.274068	0.153532	0.105269	-0.00384	0.136984	0.018061	0.125425	0.177543	0.200361	0.265862	0.451664	0.199332	0.235865	0.227319	0.246864	0.097868	0.147184	0.122056	0.168321	0.090586	0.1926	0.102441	0.215891	0.057608
32.4	0.018199	0.334997	0.144463	0.281507	0.150645	0.101362	-0.005	0.136061	0.032973	0.123475	0.164787	0.200575	0.267522	0.451417	0.193195	0.234737	0.22581	0.247706	0.099743	0.143981	0.115339	0.175303	0.099466	0.189892	0.110853	0.214047	0.06278
32.6	0.009003	0.333457	0.14134	0.284383	0.145895	0.104453	-0.00774	0.131073	0.025677	0.128807	0.164648	0.191484	0.262105	0.453932	0.195731	0.238285	0.223678	0.253556	0.099162	0.144141	0.118682	0.172475	0.097882	0.193541	0.104732	0.213434	0.056799
32.8	0.012628	0.328166	0.14	0.286288	0.144873	0.103225	-0.01222	0.139677	0.02828	0.132527	0.166076	0.195665	0.261626	0.452273	0.192867	0.241008	0.225818	0.259828	0.101129	0.138805	0.125189	0.182683	0.100177	0.192192	0.098371	0.205594	0.052333
33	0.011255	0.3237	0.147262	0.283405	0.144827	0.100904	-0.00442	0.146747	0.026561	0.126585	0.166682	0.188793	0.259819	0.453915	0.19812	0.243912	0.219997	0.261319	0.10175	0.144627	0.118755	0.173587	0.095079	0.19411	0.109956	0.214658	0.058038
33.2	0.006327	0.330475	0.144082	0.284411	0.143608	0.100099	-0.001	0.133979	0.029142	0.131857	0.165312	0.184992	0.25955	0.450593	0.195011	0.241032	0.224717	0.259917	0.096048	0.136266	0.128119	0.174131	0.097428	0.198004	0.116175	0.222053	0.059084
33.4	0.00705	0.322318	0.143303	0.281929	0.141611	0.096489	0.001761	0.124314	0.029353	0.130331	0.16524	0.188311	0.265652	0.445305	0.198885	0.236478	0.230496	0.25615	0.106305	0.134144	0.128769	0.182253	0.0914	0.195205	0.111656	0.216831	0.05371
33.6	0.007659	0.323655	0.148743	0.287396	0.141735	0.094595	-0.00093	0.134325	0.024424	0.133079	0.162277	0.188915	0.25859	0.452015	0.198372	0.245321	0.230863	0.255671	0.10371	0.142819	0.120168	0.182747	0.10001	0.195824	0.099567	0.22425	0.059887
33.8	0.010492	0.324159	0.144654	0.276246	0.137532	0.090947	-0.00068	0.119574	0.020691	0.13321	0.160121	0.186257	0.259218	0.448166	0.19972	0.241001	0.23727	0.263563	0.101184	0.147574	0.118254	0.17088	0.092714	0.196117	0.109704	0.226662	0.051775
34	0.008969	0.321134	0.145705	0.286731	0.150675	0.092852	0.001978	0.124222	0.032186	0.135669	0.163257	0.182937	0.256209	0.437892	0.192562	0.24319	0.229368	0.262225	0.103133	0.142175	0.123629	0.171	0.084583	0.193741	0.100268	0.217642	0.061838
34.2	0.007326	0.318715	0.148392	0.29266	0.147217	0.094774	-0.0014	0.113363	0.032677	0.13232	0.170625	0.177716	0.257953	0.427058	0.192273	0.243268	0.228077	0.260665	0.102998	0.139525	0.119547	0.172453	0.081605	0.190746	0.102737	0.218798	0.059667
34.4	0.016479	0.315502	0.150867	0.303965	0.156084	0.102769	-0.0058	0.104488	0.032818	0.133975	0.180604	0.180992	0.254265	0.429672	0.186561	0.236266	0.233186	0.259021	0.10738	0.138352	0.112388	0.168171	0.091345	0.194451	0.097313	0.22051	0.056888
34.6	0.017252	0.317176	0.150347	0.303683	0.159997	0.099488	-0.00537	0.111183	0.038127	0.131122	0.167324	0.181192	0.256369	0.433279	0.186955	0.243949	0.232056	0.247889	0.104541	0.135696	0.119588	0.169837	0.086036	0.186845	0.109095	0.222426	0.060861
34.8	0.016995	0.315306	0.146411	0.301125	0.152287	0.097613	-0.00517	0.109182	0.024335	0.137185	0.164318	0.176496	0.257935	0.426487	0.188196	0.246179	0.230326	0.23581	0.106555	0.141185	0.109246	0.169105	0.086515	0.184671	0.092936	0.222741	0.057972
35	0.004765	0.313739	0.145082	0.29947	0.151026	0.095596	0.002284	0.116569	0.035041	0.135935	0.161781	0.173999	0.249777	0.434641	0.185097	0.243337	0.228531	0.230772	0.106906	0.143225	0.107596	0.171229	0.089875	0.184194	0.091982	0.22838	0.052091
35.2	0.004783	0.310101	0.147591	0.300433	0.148462	0.094222	-0.01002	0.117359	0.034019	0.145359	0.17177	0.166363	0.251995	0.428447	0.184629	0.242738	0.229627	0.233033	0.106429	0.143124	0.104756	0.166832	0.078119	0.176465	0.093214	0.232444	0.055504
35.4	0.006065	0.303769	0.15234	0.300175	0.149183	0.096397	-0.0107	0.111714	0.03949	0.138666	0.171425	0.169482	0.251186	0.437162	0.193195	0.251835	0.223012	0.221093	0.108715	0.1407	0.111792	0.174943	0.083813	0.180562	0.101371	0.232756	0.050599
35.6	0.001168	0.303678	0.151363	0.302304	0.151513	0.096392	-0.01175	0.114338	0.037742	0.141597	0.171049	0.171407	0.246403	0.441626	0.195749	0.255687	0.227378	0.227861	0.10834	0.144905	0.115346	0.172417	0.083559	0.185949	0.107236	0.235024	0.048069
35.8	0.007648	0.304551	0.147255	0.299673	0.149931	0.100506	0.000364	0.103213	0.044566	0.142895	0.159498	0.175164	0.248371	0.440934	0.192857	0.256112	0.229117	0.225754	0.102133	0.143992	0.112447	0.179497	0.076423	0.179918	0.092373	0.243015	0.04903
36	0.008123	0.307491	0.15069	0.305256	0.14938	0.099724	-0.00333	0.116552	0.02726	0.141689	0.161407	0.172033	0.250668	0.433774	0.198978	0.250116	0.221341	0.218182	0.094454	0.140163	0.116256	0.170528	0.085673	0.186213	0.118678	0.225312	0.046493
36.2	0.015205	0.316937	0.155058	0.305855	0.149763	0.096045	-0.01214	0.098444	0.032192	0.144479	0.160406	0.182086	0.24874	0.436508	0.19837	0.254657	0.226987	0.222659	0.089852	0.141118	0.109845	0.173305	0.088062	0.182973	0.095181	0.231639	0.041818
36.4	0.006649	0.311379	0.150982	0.313369	0.14832	0.095419	-0.00256	0.092008	0.03146	0.140076	0.165614	0.177279	0.251047	0.426355	0.197017	0.257832	0.226847	0.229965	0.069028	0.142604	0.113357	0.178131	0.0873	0.181798	0.100956	0.235865	0.040374
36.6	0.011832	0.307698	0.150543	0.324197	0.153181	0.094024	-0.01146	0.097441	0.036739	0.135062	0.170776	0.183051	0.255202	0.435547	0.196294	0.255614	0.224232	0.226526	0.06085	0.14129	0.11521	0.178026	0.082041	0.181247	0.102412	0.244026	0.044096
36.8	0.013737	0.309316	0.152597	0.313651	0.153055	0.09661	-0.0057	0.095595	0.040922	0.13913	0.16376	0.183145	0.254453	0.43742	0.199825	0.254517	0.224196	0.228101	0.070171	0.139328	0.11283	0.177387	0.077426	0.181717	0.098412	0.241968	0.046573
37	0.006846	0.311587	0.158185	0.318356	0.151233	0.092072	-0.01188	0.093433	0.028548	0.139453	0.158257	0.177226	0.252197	0.435284	0.195613	0.252544	0.227484	0.230132	0.067104	0.142353	0.105275	0.184463	0.080654	0.184127	0.094604	0.24734	0.038814
37.2	0.007522	0.314639	0.155718	0.317591	0.151744	0.094776	-0.01344	0.09894	0.042253	0.135059	0.157448	0.18569	0.252529	0.435092	0.19109	0.248219	0.221827	0.229952	0.073918	0.13438	0.109241	0.192896	0.06916	0.186213	0.099596	0.244737	0.041683
37.4	0.008335	0.31196	0.158746	0.327016	0.150225	0.089339	-0.00461	0.089373	0.036915	0.135505	0.150958	0.184246	0.2526	0.43278	0.197405	0.247383	0.22428	0.231823	0.083962	0.135848	0.10911	0.185398	0.083113	0.180192	0.10598	0.244937	0.037885
37.6	0.006545	0.309688	0.157681	0.324076	0.146765	0.09109	-0.00054	0.109736	0.039482	0.140078	0.16953	0.181431	0.252428	0.428579	0.194481	0.244453	0.226728	0.236383	0.082668	0.141735	0.121612	0.179847	0.072635	0.181881	0.092364	0.246891	0.039679
37.8	-0.00072	0.313552	0.159469	0.332374	0.155269	0.082958	-0.00083	0.113744	0.039772	0.137698	0.160658	0.180687	0.248915	0.426712	0.19645	0.24925	0.22373	0.233804	0.082958	0.129689	0.119512	0.185408	0.079997	0.180226	0.088449	0.244628	0.040374
38	-0.00228	0.311523	0.159599	0.325096	0.162961	0.076735	0.004108	0.097573	0.037809	0.133374	0.159247	0.188869	0.244703	0.428315	0.201132	0.245988	0.222097	0.239092	0.088987	0.134051	0.114519	0.176798	0.070337	0.18009	0.099271	0.247082	0.037824
38.2	-0.00573	0.311487	0.162479	0.333133	0.157197	0.081986	-0.00593	0.098784	0.034957	0.136401	0.16714	0.179544	0.247096	0.431275	0.193397	0.244968	0.216912	0.23127	0.090241	0.126237	0.118724	0.170327	0.071063	0.1809	0.100593	0.239955	0.047747
38.4	-0.00778	0.311628	0.158129	0.329255	0.156295	0.077795	-0.00442	0.102792	0.035369	0.13852	0.16914	0.179449	0.243923	0.421128	0.1919	0.24794	0.222415	0.223051	0.089832	0.124156	0.126719	0.175341	0.071847	0.188237	0.094073	0.246269	0.048381
38.6	-0.01262	0.312455	0.158773	0.331794	0.152774	0.078121	0.007859	0.087009	0.04164	0.134678	0.17143	0.184071	0.240558	0.432599	0.194766	0.245088	0.225319	0.216804	0.09081	0.123827	0.109263	0.179065	0.078711	0.183486	0.101806	0.237872	0.040514
38.8	-0.01246	0.312657	0.163175	0.319644	0.156542	0.072952	2.97e-05	0.093277	0.039919	0.13716	0.171739	0.179465	0.23541	0.4287	0.190624	0.247699	0.226434	0.214737	0.09219	0.126683	0.108248	0.178868	0.073572	0.180973	0.098284	0.240239	0.041516
39	-0.00908	0.313538	0.162965	0.326084	0.145654	0.072265	3.66e-05	0.090388	0.035722	0.130562	0.179409	0.180692	0.236087	0.422923	0.194049	0.248103	0.224588	0.204317	0.08521	0.118479	0.123131	0.179865	0.069167	0.181861	0.099662	0.238012	0.039233
39.2	-0.01462	0.311756	0.160294	0.323426	0.150373	0.077135	-0.00766	0.091386	0.037484	0.132517	0.18272	0.18192	0.239237	0.413237	0.193125	0.247301	0.221749	0.212974	0.090783	0.12693	0.117101	0.17926	0.074288	0.181959	0.105121	0.235021	0.042767
39.4	-0.01551	0.316223	0.159364	0.322785	0.14836	0.083588	-0.0107	0.08634	0.026653	0.131872	0.161616	0.176347	0.239263	0.432275	0.201252	0.247668	0.225608	0.196023	0.099417	0.125213	0.114333	0.179148	0.071876	0.191796	0.105043	0.229096	0.04217
39.6	-0.02208	0.31795	0.163763	0.32523	0.147497	0.08493	-0.00448	0.087337	0.035426	0.128099	0.162813	0.173318	0.236493	0.442428	0.194174	0.246949	0.219571	0.195459	0.091512	0.128344	0.113755	0.171625	0.063411	0.187319	0.108993	0.230105	0.038645
39.8	-0.02099	0.316579	0.156622	0.336098	0.148606	0.078627	-0.00057	0.090809	0.04369	0.131171	0.171485	0.1773	0.247658	0.435157	0.198236	0.24326	0.22299	0.184577	0.096704	0.123003	0.11535	0.180603	0.074052	0.186071	0.110792	0.236773	0.036668
40	-0.02001	0.319631	0.162562	0.326396	0.147955	0.076914	0.002477	0.087833	0.038989	0.132802	0.173808	0.172991	0.245584	0.448199	0.197955	0.245002	0.216942	0.198017	0.096156	0.130961	0.118129	0.189889	0.074894	0.179597	0.119279	0.23518	0.043238
40.2	-0.01255	0.326695	0.175797	0.328963	0.1516	0.08136	-0.00629	0.077886	0.052304	0.129718	0.165496	0.182025	0.249876	0.447886	0.197028	0.250314	0.233195	0.204909	0.104319	0.134391	0.111978	0.181555	0.081947	0.189252	0.109278	0.241351	0.045304
40.4	-0.02708	0.32767	0.176272	0.327952	0.147787	0.075519	-0.00309	0.059472	0.058491	0.124979	0.161712	0.18191	0.242514	0.448869	0.206963	0.248761	0.227729	0.198521	0.089236	0.140549	0.111757	0.194914	0.0748	0.181014	0.113295	0.233945	0.041516
40.6	-0.03389	0.319493	0.174278	0.320464	0.128251	0.074343	-0.00876	0.0745	0.049129	0.118498	0.164883	0.186574	0.237164	0.430501	0.193003	0.241666	0.224229	0.204791	0.087479	0.132123	0.108939	0.175558	0.060081	0.1787	0.101313	0.226018	0.034065
40.8	-0.04194	0.311525	0.168318	0.299698	0.122328	0.074617	-0.01829	0.063284	0.045371	0.119769	0.148582	0.181707	0.228289	0.428524	0.193644	0.239822	0.214545	0.202517	0.082752	0.125762	0.110504	0.183207	0.051514	0.173269	0.107647	0.224765	0.026084
41	-0.03173	0.311748	0.16474	0.293222	0.120708	0.074975	-0.0278	0.059916	0.043061	0.110536	0.144208	0.172417	0.229887	0.409135	0.184654	0.23777	0.204176	0.210808	0.080887	0.117776	0.107066	0.17933	0.055008	0.165655	0.095085	0.226185	0.02478
41.2	-0.04283	0.300412	0.162638	0.28852	0.118828	0.064556	-0.03311	0.047887	0.03669	0.10556	0.143276	0.170618	0.222481	0.415236	0.184907	0.233289	0.207137	0.200821	0.073386	0.125125	0.105349	0.171442	0.057575	0.157835	0.092463	0.222991	0.023714
41.4	-0.0493	0.291145	0.155754	0.27576	0.109914	0.054704	-0.0263	0.0428	0.035925	0.102971	0.144673	0.166436	0.219063	0.397906	0.176139	0.228991	0.204414	0.206531	0.065703	0.114531	0.100054	0.168553	0.042668	0.156086	0.081122	0.220547	0.022536
41.6	-0.05153	0.285889	0.151367	0.281574	0.114924	0.05545	-0.03297	0.041722	0.023402	0.104251	0.136993	0.158656	0.210869	0.397088	0.180203	0.220884	0.199866	0.205542	0.060547	0.102736	0.10296	0.173338	0.044985	0.153112	0.078851	0.218328	0.020303
41.8	-0.05774	0.281446	0.14344	0.268996	0.10511	0.048702	-0.0351	0.041849	0.0186	0.104674	0.134109	0.156393	0.206354	0.387775	0.1751	0.219233	0.189478	0.201399	0.054695	0.09647	0.097207	0.167142	0.026231	0.153205	0.085296	0.203858	0.019169
42	-0.0605	0.27037	0.136173	0.272662	0.095368	0.048232	-0.02842	0.0378	0.02045	0.097529	0.148237	0.152698	0.200405	0.378011	0.175754	0.212286	0.186968	0.208448	0.043501	0.091877	0.096735	0.164127	0.04387	0.147838	0.095535	0.203315	0.017753
42.2	-0.06632	0.266526	0.126699	0.253517	0.090704	0.038639	-0.01501	0.027616	0.0175	0.093613	0.12997	0.151085	0.198803	0.369648	0.170637	0.209135	0.187014	0.208668	0.032793	0.097132	0.097496	0.156943	0.035292	0.147422	0.077801	0.207599	0.013093
42.4	-0.07079	0.258568	0.121481	0.253268	0.08362	0.036595	-0.02548	0.035586	0.012237	0.084394	0.122175	0.140933	0.1919	0.376265	0.165116	0.210194	0.171593	0.212412	0.018022	0.093433	0.097759	0.151776	0.029997	0.144509	0.080023	0.197926	0.010893
42.6	-0.06898	0.25086	0.119823	0.239843	0.078933	0.034524	-0.03694	0.031324	0.005031	0.082624	0.129553	0.134897	0.190375	0.361016	0.167431	0.208477	0.171509	0.210804	0.02082	0.083725	0.101691	0.15341	0.022461	0.144387	0.084681	0.196392	0.00957
42.8	-0.08275	0.245847	0.112803	0.234063	0.069313	0.030509	-0.03446	0.02847	0.007929	0.083252	0.122826	0.135913	0.183345	0.372224	0.162598	0.205869	0.171649	0.216956	0.020059	0.090279	0.091497	0.151758	0.014033	0.149047	0.066793	0.19314	0.009106
43	-0.08676	0.244652	0.107658	0.222806	0.066787	0.026888	-0.04153	0.016775	0.000129	0.080037	0.145873	0.136946	0.182284	0.352774	0.159426	0.199318	0.168575	0.214658	0.004532	0.08465	0.09717	0.147009	0.026275	0.150347	0.077937	0.187485	0.002587
43.2	-0.09136	0.240767	0.100369	0.223019	0.057709	0.023196	-0.0344	0.024941	-0.00606	0.07926	0.118613	0.129785	0.1801	0.348919	0.172614	0.197089	0.164649	0.214843	0.00512	0.081137	0.092877	0.143397	0.011051	0.148281	0.065537	0.185466	-0.0034
43.4	-0.09656	0.237173	0.096293	0.219638	0.051996	0.022733	-0.03975	0.022415	-0.0071	0.074456	0.113331	0.127643	0.174307	0.353197	0.168241	0.196126	0.164781	0.208312	-0.00371	0.079699	0.089307	0.141195	0.008669	0.146031	0.068684	0.188804	-0.00408
43.6	-0.09668	0.236585	0.097693	0.209691	0.04394	0.011981	-0.0362	0.020535	-0.00913	0.067634	0.11478	0.125281	0.169982	0.346959	0.171307	0.198147	0.160295	0.214539	0.004889	0.073492	0.086941	0.136486	0.008578	0.147045	0.065833	0.181442	-0.008
43.8	-0.09935	0.231983	0.098175	0.21059	0.044008	0.018712	-0.04183	0.013338	0.000449	0.069104	0.103327	0.113812	0.166338	0.3544	0.166219	0.1897	0.152998	0.218054	0.00354	0.071234	0.088825	0.136796	-0.00647	0.142207	0.081247	0.193311	-0.01027
44	-0.10349	0.224715	0.092347	0.205104	0.040349	0.009692	-0.03766	0.008828	-0.00022	0.074145	0.1087	0.117818	0.169423	0.345257	0.163565	0.187546	0.158169	0.20784	0.005076	0.062602	0.090795	0.130704	-0.00205	0.140163	0.085188	0.18616	-0.00834
44.2	-0.1053	0.22589	0.088086	0.19717	0.038227	0.00808	-0.04108	0.000276	0.003166	0.065659	0.109843	0.11404	0.163756	0.328712	0.16392	0.180941	0.153791	0.210713	0.010924	0.069925	0.098999	0.138508	0.009163	0.137601	0.07859	0.179334	-0.01209
44.4	-0.11032	0.22919	0.083259	0.203151	0.03316	0.012274	-0.04176	0.002963	-0.01249	0.065795	0.107036	0.11869	0.161721	0.330535	0.154919	0.178629	0.146561	0.196955	0.014157	0.071228	0.084926	0.142768	-0.00186	0.14114	0.070216	0.178739	-0.01955
44.6	-0.11214	0.228981	0.088957	0.192028	0.029957	0.014725	-0.04419	-0.00675	-0.00018	0.066929	0.105713	0.111294	0.159866	0.326098	0.155799	0.177578	0.146097	0.210175	0.015145	0.071493	0.079898	0.128612	-0.00273	0.127835	0.083083	0.174286	-0.01803
44.8	-0.1175	0.223839	0.085132	0.191378	0.023695	0.004898	-0.04708	0.00211	-0.00605	0.06676	0.102599	0.102231	0.158579	0.327131	0.161238	0.177451	0.13729	0.211545	0.019013	0.064661	0.084484	0.134677	-0.00521	0.127175	0.059638	0.163743	-0.02059
45	-0.12343	0.225757	0.085625	0.19078	0.017047	0.00937	-0.04132	-0.01092	-0.0064	0.065311	0.100791	0.115931	0.155143	0.312299	0.158764	0.167465	0.135253	0.21448	0.019646	0.056806	0.088814	0.127674	-0.00717	0.125363	0.06802	0.15952	-0.01459
45.2	-0.12723	0.216759	0.079217	0.182223	0.02335	0.008607	-0.04342	-0.00017	-0.00853	0.061601	0.108538	0.117218	0.151926	0.318751	0.154657	0.162806	0.129752	0.21217	0.022097	0.053166	0.081703	0.123901	-0.01271	0.122468	0.067605	0.14827	-0.02082
45.4	-0.11565	0.218525	0.078851	0.181956	0.010416	0.000687	-0.04482	-0.00425	-0.00953	0.055558	0.115221	0.115626	0.148677	0.315945	0.155742	0.167	0.127909	0.200905	0.016654	0.054554	0.082741	0.114769	-0.00503	0.123692	0.061433	0.154902	-0.02421
45.6	-0.1259	0.219299	0.078894	0.182233	0.007738	-0.00046	-0.04948	-0.01459	-0.01184	0.057039	0.08688	0.109748	0.146428	0.306144	0.16139	0.16123	0.12606	0.199376	0.019925	0.056103	0.075938	0.119991	-0.00368	0.117097	0.065439	0.143696	-0.02844
45.8	-0.12982	0.215018	0.076039	0.190564	0.010505	-0.0032	-0.05174	-0.02694	-0.01876	0.058045	0.088471	0.10492	0.146387	0.315193	0.14832	0.159033	0.12491	0.209422	0.017146	0.060544	0.075347	0.118166	-0.00837	0.107574	0.073757	0.145164	-0.02631
46	-0.12834	0.21292	0.071125	0.183353	0.002921	-0.0104	-0.04324	-0.02773	-0.01383	0.058945	0.08935	0.10901	0.138736	0.30225	0.148718	0.153103	0.111986	0.202177	0.01124	0.062643	0.076627	0.114424	-0.01362	0.114994	0.060783	0.143413	-0.02625
46.2	-0.13095	0.20508	0.074747	0.170684	0.002505	-0.00748	-0.05209	-0.03701	-0.02064	0.059303	0.086741	0.108382	0.139759	0.302657	0.154234	0.159252	0.111457	0.200235	0.013015	0.057565	0.07589	0.1119	-0.01158	0.111157	0.062002	0.131787	-0.03133
46.4	-0.13447	0.206222	0.076562	0.17538	-0.00022	-0.00424	-0.04172	-0.03292	-0.02156	0.055961	0.090596	0.105101	0.138822	0.302278	0.147472	0.153977	0.112112	0.206531	0.013184	0.059662	0.078798	0.121584	-0.02143	0.11179	0.047241	0.139769	-0.03325
46.6	-0.13713	0.203477	0.064574	0.178302	-0.00667	-0.01249	-0.0424	-0.0255	-0.01735	0.050923	0.09503	0.097882	0.129963	0.293926	0.148439	0.156721	0.114331	0.204043	0.0089	0.051953	0.072538	0.110931	-0.01801	0.111871	0.057233	0.141975	-0.03439
46.8	-0.14219	0.20007	0.068336	0.173051	-0.0084	-0.0103	-0.05127	-0.02973	-0.01959	0.048718	0.092126	0.100653	0.127079	0.286788	0.148988	0.156555	0.111762	0.200442	0.014033	0.0461	0.081288	0.112758	-0.01337	0.109367	0.056351	0.144068	-0.04148
47	-0.13996	0.191948	0.063996	0.175225	-0.01399	-0.01215	-0.04546	-0.04333	-0.02572	0.046396	0.08357	0.098592	0.122148	0.280901	0.158376	0.154808	0.107824	0.199447	-0.00062	0.060934	0.079695	0.102579	-0.02292	0.111423	0.05486	0.138925	-0.03727
47.2	-0.13934	0.19178	0.067543	0.167869	-0.00527	-0.00886	-0.0497	-0.03204	-0.01609	0.050618	0.088476	0.103147	0.124283	0.275893	0.156746	0.146823	0.105649	0.217246	-0.00148	0.053596	0.076568	0.102675	-0.01971	0.1104	0.044607	0.13527	-0.03528
47.4	-0.14322	0.193093	0.058101	0.172993	-0.00162	-0.01076	-0.03763	-0.03463	-0.02747	0.049778	0.101294	0.100717	0.121829	0.273686	0.146621	0.148583	0.100899	0.210438	-0.00336	0.05164	0.068521	0.1074	-0.02848	0.116071	0.059513	0.139732	-0.03983
47.6	-0.13955	0.192115	0.060274	0.178001	0.001853	-0.01321	-0.03834	-0.04269	-0.02981	0.050156	0.088572	0.101181	0.114271	0.267113	0.148196	0.146812	0.094432	0.202049	-0.01201	0.048346	0.070735	0.099108	-0.03713	0.109784	0.053929	0.135743	-0.04054
47.8	-0.14658	0.190319	0.060928	0.17138	0.008616	-0.01785	-0.04766	-0.05317	-0.02993	0.046678	0.07571	0.109243	0.115597	0.267519	0.143199	0.144098	0.090656	0.202929	-0.00923	0.055549	0.070274	0.104546	-0.04026	0.111565	0.066753	0.134013	-0.04161
48	-0.14277	0.191801	0.062048	0.170687	0.012119	-0.01702	-0.0532	-0.07037	-0.03343	0.044693	0.078829	0.10038	0.115024	0.265367	0.148691	0.139338	0.090751	0.196687	-0.00908	0.049606	0.070403	0.105706	-0.03949	0.110508	0.049895	0.14001	-0.03887
48.2	-0.15228	0.187336	0.059286	0.162742	0.007679	-0.01952	-0.04326	-0.05684	-0.03552	0.041763	0.08077	0.099522	0.117712	0.272703	0.141327	0.137736	0.087318	0.198942	-0.00819	0.051083	0.073105	0.114832	-0.03963	0.102948	0.04767	0.136162	-0.04636
48.4	-0.14832	0.176676	0.057753	0.160865	0.012739	-0.023	-0.04234	-0.07534	-0.03653	0.044161	0.088809	0.092219	0.110641	0.263588	0.138325	0.135527	0.083294	0.191004	-0.01267	0.047293	0.070856	0.105057	-0.02535	0.110953	0.048642	0.137426	-0.05128
48.6	-0.14975	0.177977	0.057614	0.152317	0.023711	-0.02434	-0.04815	-0.0744	-0.03465	0.048415	0.093209	0.09091	0.110848	0.261144	0.139071	0.129261	0.079642	0.193331	-0.00505	0.04435	0.066884	0.103772	-0.04612	0.104455	0.047087	0.136233	-0.05154
48.8	-0.15101	0.172712	0.067386	0.156928	0.022691	-0.027	-0.04645	-0.07446	-0.02458	0.043974	0.070345	0.089867	0.108538	0.259843	0.131901	0.122998	0.075699	0.194899	0.003277	0.043923	0.062683	0.08796	-0.02963	0.104549	0.052865	0.137132	-0.0499
49	-0.15431	0.183802	0.064749	0.151282	0.023717	-0.02782	-0.05063	-0.07541	-0.03071	0.038085	0.066993	0.091703	0.101812	0.247268	0.134762	0.128964	0.072355	0.194413	0.000489	0.039384	0.069523	0.092589	-0.03488	0.099487	0.054924	0.132706	-0.05226
49.2	-0.15851	0.172899	0.059799	0.151919	0.028343	-0.02378	-0.04495	-0.08625	-0.01553	0.038661	0.070793	0.095819	0.097266	0.25529	0.12717	0.122469	0.071484	0.187821	0.008116	0.049423	0.072092	0.102741	-0.03327	0.094169	0.03744	0.133694	-0.04976
49.4	-0.16174	0.176307	0.057108	0.160072	0.024404	-0.01861	-0.04297	-0.08479	-0.02789	0.039018	0.069612	0.089688	0.09694	0.249173	0.126425	0.117495	0.070569	0.194828	0.002391	0.047925	0.061189	0.08921	-0.05067	0.08968	0.04139	0.130578	-0.05512
49.6	-0.15599	0.171864	0.055465	0.155054	0.034156	-0.01732	-0.0472	-0.07698	-0.0287	0.037263	0.06719	0.091071	0.091086	0.241338	0.119212	0.124788	0.068631	0.19632	0.008159	0.046326	0.067991	0.087472	-0.0371	0.089265	0.047858	0.137874	-0.04444
49.8	-0.15423	0.170712	0.05919	0.157703	0.039658	-0.01173	-0.043	-0.08538	-0.02845	0.042645	0.060667	0.093205	0.090217	0.233095	0.118107	0.120214	0.06757	0.193526	0.013747	0.042858	0.063952	0.081736	-0.05093	0.084744	0.05151	0.138259	-0.05127
50	-0.16317	0.166531	0.055828	0.157502	0.034267	-0.01323	-0.04242	-0.09305	-0.03733	0.036491	0.065039	0.088604	0.08943	0.240042	0.121141	0.121525	0.062262	0.188743	0.011715	0.037842	0.06367	0.078342	-0.05066	0.089568	0.044427	0.130193	-0.05564
50.2	-0.15364	0.164603	0.053796	0.148223	0.033959	-0.01664	-0.04495	-0.10595	-0.03368	0.036428	0.061989	0.081624	0.084375	0.226506	0.119352	0.117168	0.053701	0.195604	0.007974	0.049755	0.060581	0.083945	-0.04839	0.089524	0.050849	0.124666	-0.05607
50.4	-0.16649	0.169985	0.052494	0.154902	0.039145	-0.01811	-0.04145	-0.1061	-0.02969	0.044522	0.062219	0.084175	0.082212	0.237604	0.124937	0.11737	0.051488	0.190685	0.014671	0.044309	0.056586	0.078772	-0.06181	0.083345	0.057387	0.124809	-0.06109
50.6	-0.15469	0.167288	0.051365	0.154043	0.031759	-0.02458	-0.04608	-0.10053	-0.04683	0.037897	0.057139	0.084098	0.08183	0.225737	0.127089	0.123069	0.052589	0.191393	0.013655	0.043665	0.053813	0.077962	-0.05802	0.091768	0.044827	0.125625	-0.05791
50.8	-0.16154	0.160004	0.051985	0.146215	0.028315	-0.02316	-0.04437	-0.10283	-0.04999	0.035735	0.072388	0.078954	0.079948	0.215513	0.12444	0.111877	0.046816	0.18664	0.005827	0.04668	0.059292	0.069447	-0.06304	0.088386	0.047716	0.121607	-0.05463
51	-0.15328	0.15917	0.056391	0.144371	0.029452	-0.02234	-0.04454	-0.10488	-0.05456	0.041982	0.062272	0.085399	0.073815	0.22006	0.117927	0.111135	0.049267	0.179978	0.010792	0.056283	0.060625	0.072351	-0.07463	0.079091	0.048789	0.117599	-0.05819
51.2	-0.15714	0.159801	0.050565	0.151397	0.024925	-0.02746	-0.04678	-0.09963	-0.05506	0.042511	0.065745	0.08593	0.072112	0.218165	0.122801	0.108285	0.044392	0.182398	0.006434	0.043615	0.055774	0.081286	-0.05991	0.080019	0.048296	0.117717	-0.06093
51.4	-0.15618	0.160565	0.055714	0.138676	0.024802	-0.02514	-0.03531	-0.1009	-0.06933	0.03268	0.064732	0.08462	0.071403	0.214217	0.120743	0.10395	0.041858	0.170947	0.003257	0.042082	0.067068	0.084544	-0.06515	0.078976	0.034504	0.11868	-0.06103
51.6	-0.15388	0.157577	0.051006	0.133009	0.023891	-0.0316	-0.03196	-0.09646	-0.06878	0.040303	0.064071	0.082302	0.065765	0.217237	0.123388	0.100103	0.036857	0.168561	0.007146	0.043754	0.065324	0.085786	-0.07303	0.086751	0.038173	0.130099	-0.06339
51.8	-0.15822	0.148166	0.051253	0.132529	0.025063	-0.02968	-0.02962	-0.10575	-0.08375	0.033919	0.064313	0.082197	0.066875	0.216287	0.118997	0.103162	0.036946	0.165011	0.004359	0.043533	0.068829	0.078203	-0.07653	0.088824	0.035876	0.134255	-0.06645
52	-0.1538	0.149972	0.05759	0.135891	0.020479	-0.02944	-0.03305	-0.10541	-0.08337	0.03658	0.059309	0.080221	0.07045	0.21967	0.122782	0.097486	0.03337	0.167326	0.000571	0.040753	0.056955	0.081738	-0.08234	0.091189	0.045138	0.12593	-0.06573
52.2	-0.1566	0.146646	0.04823	0.137152	0.022391	-0.02908	-0.03651	-0.11164	-0.08124	0.039717	0.055364	0.07592	0.075071	0.218544	0.120651	0.089211	0.031111	0.164565	-0.00663	0.03902	0.064611	0.083499	-0.07958	0.094223	0.044157	0.11962	-0.06742
52.4	-0.1588	0.147067	0.049615	0.132523	0.01726	-0.03309	-0.03621	-0.10843	-0.08593	0.033687	0.056243	0.077781	0.074897	0.217951	0.119457	0.093443	0.028698	0.156175	-0.01417	0.03665	0.067711	0.089799	-0.08228	0.088876	0.045721	0.124976	-0.07228
52.6	-0.15108	0.140536	0.053744	0.131575	0.013098	-0.03581	-0.03017	-0.12272	-0.09622	0.038202	0.061848	0.076271	0.068474	0.201077	0.115548	0.088006	0.024245	0.165681	-0.01699	0.04221	0.061806	0.090896	-0.08033	0.088083	0.050344	0.120165	-0.07526
52.8	-0.15403	0.137162	0.041884	0.11999	0.011983	-0.02937	-0.03739	-0.11619	-0.09187	0.031922	0.060526	0.075671	0.066705	0.20469	0.117795	0.080473	0.028194	0.164992	-0.024	0.036748	0.063574	0.087807	-0.08644	0.084609	0.065523	0.116724	-0.07725
53	-0.15899	0.149639	0.044584	0.12335	0.015324	-0.03219	-0.03931	-0.10806	-0.08978	0.03146	0.046541	0.080345	0.062185	0.195893	0.109489	0.080965	0.026197	0.159337	-0.03342	0.034185	0.064707	0.083099	-0.0913	0.087256	0.048453	0.123086	-0.07243
53.2	-0.16504	0.142086	0.044556	0.125133	0.009483	-0.03825	-0.04074	-0.1214	-0.09398	0.027319	0.051723	0.074408	0.056917	0.197738	0.114047	0.086947	0.026361	0.166966	-0.03223	0.0347	0.068983	0.093262	-0.09398	0.082086	0.051226	0.126638	-0.06767
53.4	-0.15924	0.136925	0.052487	0.114237	0.012044	-0.04068	-0.03758	-0.10881	-0.09414	0.021599	0.050659	0.075379	0.060003	0.201659	0.113326	0.086902	0.024602	0.162247	-0.03473	0.039002	0.0619	0.100714	-0.08577	0.086135	0.040575	0.111008	-0.06321
53.6	-0.16322	0.136751	0.0462	0.121536	0.00776	-0.04268	-0.03605	-0.11202	-0.0932	0.020181	0.059443	0.079182	0.057645	0.189589	0.111175	0.078405	0.019304	0.163406	-0.02419	0.030436	0.061252	0.085975	-0.0968	0.084527	0.042083	0.115309	-0.07464
53.8	-0.16249	0.132479	0.046205	0.117129	0.014679	-0.04624	-0.03695	-0.12874	-0.09352	0.019854	0.071236	0.07299	0.056025	0.199396	0.105722	0.079049	0.02004	0.161813	-0.02683	0.027482	0.06479	0.08632	-0.10124	0.076578	0.049657	0.111599	-0.07784
54	-0.16859	0.132607	0.053951	0.129525	0.01206	-0.04325	-0.03908	-0.11518	-0.08371	0.016174	0.048695	0.078959	0.052412	0.194213	0.110623	0.078056	0.014006	0.160764	-0.02325	0.041165	0.06036	0.087623	-0.10269	0.078834	0.052514	0.1077	-0.07007
54.2	-0.16932	0.130349	0.051221	0.114693	0.013457	-0.03674	-0.0391	-0.11653	-0.09564	0.021397	0.038814	0.074566	0.056054	0.17529	0.110085	0.082516	0.013822	0.163336	-0.02341	0.036728	0.061716	0.078061	-0.10045	0.077326	0.053805	0.115225	-0.07987
54.4	-0.16413	0.121862	0.051544	0.118396	0.015038	-0.03808	-0.04285	-0.11068	-0.09597	0.020297	0.037324	0.069765	0.054751	0.189787	0.102494	0.078516	0.008805	0.16564	-0.02044	0.028777	0.053413	0.076372	-0.11171	0.076827	0.057195	0.116974	-0.07452
54.6	-0.15891	0.124233	0.042555	0.125585	0.013333	-0.044	-0.04043	-0.1211	-0.08827	0.016093	0.041662	0.071394	0.047791	0.186031	0.105261	0.080879	-0.00243	0.165676	-0.02174	0.030104	0.054962	0.078603	-0.10802	0.073457	0.038406	0.107443	-0.07271
54.8	-0.16736	0.127431	0.04292	0.117463	0.008265	-0.03845	-0.03674	-0.11767	-0.08991	0.017395	0.040907	0.071923	0.048684	0.170019	0.098152	0.071751	0.001143	0.166076	-0.01232	0.023251	0.060795	0.079473	-0.10522	0.075757	0.052682	0.109186	-0.07565
55	-0.16095	0.126905	0.046426	0.125449	0.011348	-0.04506	-0.04088	-0.13395	-0.09106	0.011965	0.042483	0.071253	0.048854	0.168805	0.096818	0.075824	-0.00272	0.15407	-0.01202	0.02556	0.055109	0.08052	-0.10889	0.072821	0.060986	0.107129	-0.07977
55.2	-0.16263	0.121205	0.047748	0.11948	0.012295	-0.04739	-0.03804	-0.12895	-0.09326	0.017733	0.041348	0.069578	0.042861	0.162771	0.095313	0.068572	-0.00484	0.153241	-0.01111	0.031642	0.054654	0.075305	-0.10327	0.071531	0.056955	0.109128	-0.08075
55.4	-0.16006	0.120077	0.039785	0.115073	0.005317	-0.04684	-0.03951	-0.1361	-0.09182	0.021435	0.041075	0.064858	0.041147	0.173226	0.095163	0.072923	-0.00687	0.127072	-0.01428	0.035262	0.056756	0.078945	-0.1072	0.067796	0.049752	0.102678	-0.08339
55.6	-0.16662	0.116159	0.04523	0.118195	-0.00117	-0.04783	-0.03552	-0.12642	-0.09065	0.019165	0.047636	0.078523	0.03998	0.16908	0.093767	0.074479	-0.01161	0.130992	-0.01508	0.032494	0.049529	0.065506	-0.1065	0.071817	0.052546	0.101052	-0.08368
55.8	-0.16015	0.116629	0.037027	0.121175	-0.00127	-0.04931	-0.04301	-0.13675	-0.09561	0.020086	0.043779	0.070082	0.040812	0.171518	0.089656	0.065616	-0.01146	0.129678	-0.01487	0.039519	0.051636	0.06589	-0.11219	0.077278	0.043632	0.104223	-0.09113
56	-0.16276	0.118236	0.045091	0.112087	-0.00244	-0.05184	-0.04626	-0.12484	-0.09866	0.02462	0.055658	0.071344	0.043136	0.178926	0.090141	0.067431	-0.01675	0.128724	-0.01601	0.036277	0.050735	0.063506	-0.11723	0.080385	0.064626	0.102935	-0.09349
56.2	-0.1666	0.110314	0.03951	0.112166	-0.00377	-0.05108	-0.0438	-0.13212	-0.09425	0.019539	0.046577	0.072298	0.051662	0.171386	0.083686	0.059955	-0.01402	0.126288	-0.01187	0.032766	0.052713	0.065621	-0.10794	0.08124	0.053372	0.099606	-0.09063
56.4	-0.16735	0.114126	0.035974	0.123265	-0.003	-0.05141	-0.04852	-0.13048	-0.09506	0.024245	0.043748	0.068653	0.042453	0.161431	0.087706	0.064922	-0.02784	0.129299	-0.01942	0.03019	0.054756	0.072566	-0.114	0.078778	0.055844	0.099168	-0.08983
56.6	-0.16744	0.107112	0.041143	0.106191	-0.00806	-0.05515	-0.04046	-0.1301	-0.09168	0.029021	0.042179	0.071307	0.047764	0.168306	0.085653	0.063385	-0.02434	0.127607	-0.01135	0.032653	0.057428	0.075711	-0.10906	0.079113	0.052102	0.108806	-0.09071
56.8	-0.17108	0.114396	0.044361	0.118292	-0.01588	-0.05742	-0.04741	-0.13374	-0.08986	0.03001	0.045202	0.074193	0.046644	0.155435	0.090213	0.060625	-0.02839	0.128056	-0.01212	0.039203	0.055292	0.074009	-0.11327	0.077534	0.03496	0.109979	-0.09739
57	-0.17217	0.113166	0.045021	0.12461	-0.01449	-0.05802	-0.04643	-0.13306	-0.09141	0.031578	0.058775	0.074778	0.044164	0.15823	0.087727	0.063463	-0.0249	0.137061	-0.01483	0.033343	0.054323	0.064328	-0.11158	0.078619	0.034591	0.1033	-0.09097
57.2	-0.16784	0.113376	0.046482	0.124996	-0.01575	-0.05734	-0.03713	-0.13491	-0.09854	0.031942	0.041403	0.077245	0.042219	0.161678	0.084399	0.059003	-0.02796	0.128675	-0.01588	0.039592	0.049335	0.071907	-0.12736	0.073249	0.024161	0.102782	-0.08869
57.4	-0.17441	0.114444	0.045645	0.12885	-0.01252	-0.05904	-0.0343	-0.13394	-0.09685	0.03051	0.03524	0.071495	0.040787	0.165934	0.087415	0.062957	-0.03328	0.139611	-0.01701	0.024371	0.041869	0.068947	-0.13055	0.079947	0.043328	0.10154	-0.089
57.6	-0.17673	0.111872	0.044022	0.115188	-0.00904	-0.06237	-0.0328	-0.14169	-0.08763	0.031104	0.033292	0.070564	0.041073	0.161541	0.087757	0.054923	-0.03654	0.134313	-0.01017	0.030263	0.045317	0.057982	-0.12162	0.081059	0.036596	0.099962	-0.0866
57.8	-0.175	0.111631	0.042801	0.120829	-0.0147	-0.0632	-0.03866	-0.14352	-0.0893	0.039609	0.035091	0.068562	0.039411	0.149702	0.084537	0.05524	-0.03943	0.131497	-0.01588	0.027542	0.050387	0.060349	-0.12255	0.077672	0.035905	0.095131	-0.08596
58	-0.17573	0.110623	0.039985	0.119097	-0.02261	-0.06672	-0.04656	-0.14531	-0.08135	0.032222	0.036698	0.072802	0.045284	0.151602	0.086197	0.054603	-0.04521	0.138063	-0.01587	0.025755	0.038747	0.053438	-0.12697	0.076382	0.033736	0.098446	-0.08784
58.2	-0.17053	0.108644	0.042371	0.134202	-0.01936	-0.0648	-0.04805	-0.14124	-0.09245	0.034481	0.034116	0.084785	0.051392	0.156972	0.087751	0.060092	-0.0442	0.1325	-0.01265	0.029219	0.049763	0.042811	-0.13064	0.078317	0.038026	0.088932	-0.08937
58.4	-0.17717	0.108418	0.037984	0.125913	-0.02689	-0.06685	-0.04762	-0.14062	-0.08535	0.042539	0.037613	0.075837	0.052865	0.150438	0.079311	0.054532	-0.0443	0.13088	-0.03012	0.03478	0.048109	0.05172	-0.13209	0.074531	0.027868	0.084081	-0.0931
58.6	-0.17486	0.10739	0.039115	0.137723	-0.02468	-0.06429	-0.04502	-0.14745	-0.08493	0.034141	0.036622	0.079823	0.060157	0.152442	0.081257	0.057654	-0.04676	0.131547	-0.02079	0.029335	0.044075	0.053778	-0.12823	0.075686	0.029132	0.094237	-0.09219
58.8	-0.16986	0.107785	0.038895	0.131138	-0.02785	-0.06736	-0.04574	-0.15159	-0.08119	0.037223	0.035867	0.075514	0.061077	0.150366	0.084712	0.056287	-0.04098	0.136488	-0.02178	0.033661	0.041471	0.054606	-0.13148	0.076475	0.032001	0.088875	-0.09366
59	-0.17419	0.1064	0.035145	0.129227	-0.02569	-0.07068	-0.04516	-0.15441	-0.08139	0.033665	0.037041	0.082992	0.060695	0.146034	0.080057	0.049592	-0.04405	0.134075	-0.01314	0.022915	0.040373	0.060968	-0.13132	0.0791	0.036677	0.086653	-0.08883
59.2	-0.17224	0.102538	0.039339	0.125761	-0.03395	-0.07837	-0.04751	-0.14664	-0.08302	0.03583	0.039554	0.076935	0.066412	0.14465	0.081771	0.049306	-0.04406	0.136535	-0.01654	0.027203	0.04611	0.054165	-0.14726	0.075481	0.028779	0.090633	-0.09499
59.4	-0.16983	0.099772	0.04342	0.130281	-0.0343	-0.06996	-0.04866	-0.15229	-0.07516	0.027249	0.035266	0.076466	0.066759	0.141674	0.082096	0.048677	-0.04607	0.132055	-0.01001	0.026501	0.042679	0.049752	-0.13436	0.073755	0.032976	0.088525	-0.09362
59.6	-0.16894	0.100431	0.034365	0.132134	-0.03296	-0.06384	-0.04244	-0.14789	-0.0904	0.034651	0.038629	0.072935	0.068411	0.134283	0.079849	0.050071	-0.05154	0.139225	-0.01447	0.030497	0.03347	0.054579	-0.13582	0.071704	0.017788	0.090976	-0.09607
59.8	-0.16945	0.09564	0.036913	0.137334	-0.02811	-0.06806	-0.05645	-0.14854	-0.08277	0.030028	0.051938	0.070825	0.066483	0.137643	0.074248	0.04422	-0.05283	0.129752	-0.01498	0.0263	0.030993	0.048816	-0.13316	0.073119	0.039276	0.093661	-0.08752
60	-0.17453	0.097629	0.034528	0.13341	-0.02932	-0.07072	-0.04671	-0.15594	-0.0879	0.027437	0.045427	0.073945	0.062525	0.132333	0.078169	0.051155	-0.05251	0.125817	-0.01281	0.02757	0.035152	0.050823	-0.12784	0.067882	0.033121	0.093244	-0.09697
60.2	-0.17293	0.094474	0.03309	0.122533	-0.03259	-0.07565	-0.04814	-0.15685	-0.08523	0.033586	0.042237	0.076715	0.067169	0.140878	0.080857	0.054802	-0.05109	0.13743	-0.01801	0.032207	0.041265	0.046691	-0.12091	0.081687	0.036903	0.086187	-0.10251
60.4	-0.17795	0.095527	0.032944	0.125057	-0.03391	-0.07549	-0.04071	-0.15939	-0.0907	0.028549	0.039467	0.070441	0.062444	0.131021	0.084894	0.044801	-0.06106	0.13503	-0.01506	0.045817	0.040834	0.053798	-0.12164	0.067395	0.035229	0.088035	-0.10675
60.6	-0.17364	0.091781	0.035297	0.130369	-0.03148	-0.07546	-0.03968	-0.15857	-0.08918	0.024771	0.036121	0.070637	0.069891	0.130423	0.079175	0.047995	-0.06305	0.134447	-0.01689	0.037795	0.043302	0.043617	-0.14023	0.068785	0.013963	0.08556	-0.10965
60.8	-0.17925	0.092242	0.030849	0.12478	-0.03626	-0.08202	-0.05324	-0.14967	-0.08398	0.027587	0.047938	0.070572	0.071666	0.12369	0.078379	0.049301	-0.06644	0.139835	-0.01592	0.037322	0.037056	0.049987	-0.13554	0.072121	0.025257	0.083499	-0.10613
61	-0.17141	0.09438	0.039424	0.121655	-0.03823	-0.08342	-0.04436	-0.14553	-0.0903	0.025829	0.041058	0.073128	0.074592	0.130181	0.080682	0.051694	-0.06553	0.13998	-0.01826	0.040156	0.035428	0.040843	-0.13474	0.062618	0.015436	0.08262	-0.1057
61.2	-0.18284	0.091448	0.043103	0.132377	-0.04499	-0.08338	-0.03303	-0.13537	-0.08834	0.036365	0.034063	0.066814	0.069484	0.122587	0.080624	0.044733	-0.07172	0.132344	-0.01961	0.028868	0.030441	0.036203	-0.13869	0.063963	0.018847	0.088852	-0.10739
61.4	-0.17707	0.090315	0.038405	0.135226	-0.04333	-0.08317	-0.04674	-0.1466	-0.09212	0.033198	0.038823	0.06949	0.072256	0.129061	0.083898	0.043742	-0.074	0.133489	-0.01915	0.033426	0.032892	0.042507	-0.13578	0.059066	0.019906	0.086545	-0.10883
61.6	-0.17801	0.088711	0.036796	0.133905	-0.04285	-0.08615	-0.04862	-0.1472	-0.09683	0.032068	0.034274	0.068688	0.073327	0.120346	0.081391	0.045923	-0.07242	0.128408	-0.01948	0.027811	0.037246	0.044925	-0.12968	0.067246	0.013594	0.079605	-0.10314
61.8	-0.18576	0.088134	0.037816	0.143418	-0.03892	-0.08357	-0.0399	-0.15608	-0.09951	0.030363	0.042931	0.067621	0.0674	0.105471	0.081424	0.051657	-0.07762	0.130459	-0.01459	0.034987	0.037001	0.046585	-0.1416	0.058149	0.020602	0.076706	-0.10034
62	-0.18915	0.088705	0.029527	0.133923	-0.03841	-0.09407	-0.04902	-0.15669	-0.0897	0.034136	0.063391	0.064572	0.068202	0.115959	0.084422	0.041891	-0.07757	0.1318	-0.02004	0.029369	0.032984	0.041311	-0.1367	0.057439	0.026212	0.075578	-0.09678
62.2	-0.18584	0.081854	0.032115	0.134117	-0.0216	-0.09399	-0.05229	-0.14798	-0.08437	0.034457	0.068922	0.073436	0.070273	0.122224	0.084867	0.049407	-0.07823	0.127181	-0.02192	0.030539	0.026628	0.040349	-0.1275	0.061866	0.020091	0.07804	-0.09854
62.4	-0.1784	0.08453	0.034878	0.134381	-0.01509	-0.08985	-0.04322	-0.14508	-0.08831	0.027868	0.041844	0.073574	0.069343	0.120319	0.086261	0.051738	-0.08397	0.133497	-0.0207	0.027624	0.031468	0.034131	-0.14018	0.064091	0.026055	0.070961	-0.09761
62.6	-0.1896	0.087304	0.038772	0.13009	-0.0221	-0.09784	-0.05302	-0.14625	-0.0849	0.024133	0.032379	0.076806	0.067447	0.119462	0.09158	0.053119	-0.08455	0.141139	-0.02458	0.027737	0.028934	0.037722	-0.14362	0.063606	0.018572	0.064482	-0.09822
62.8	-0.1909	0.085753	0.032671	0.129719	-0.01201	-0.09669	-0.05204	-0.14977	-0.08152	0.024307	0.025303	0.080938	0.069776	0.099919	0.085774	0.047617	-0.08603	0.134461	-0.03008	0.024026	0.020683	0.038996	-0.14536	0.05689	0.016532	0.073897	-0.09872
63	-0.18696	0.081216	0.030594	0.125281	-0.01344	-0.09763	-0.05222	-0.14689	-0.08602	0.023902	0.032966	0.078962	0.067364	0.106926	0.090586	0.04543	-0.08906	0.141895	-0.02204	0.026039	0.022827	0.03528	-0.15106	0.064061	0.019033	0.068675	-0.10032
63.2	-0.18632	0.077478	0.029299	0.126068	-0.01398	-0.10015	-0.05372	-0.14325	-0.07661	0.019803	0.032588	0.07876	0.071079	0.106789	0.084055	0.047487	-0.08406	0.139286	-0.03327	0.02471	0.026011	0.03759	-0.1436	0.06225	0.008286	0.068388	-0.10258
63.4	-0.18796	0.08031	0.021606	0.121117	-0.01875	-0.10079	-0.05349	-0.13701	-0.0752	0.020552	0.03568	0.078079	0.067882	0.107475	0.084055	0.045541	-0.08713	0.140714	-0.02327	0.021107	0.027116	0.034155	-0.13225	0.060136	0.029196	0.065478	-0.10548
63.6	-0.1865	0.076142	0.030262	0.121788	-0.01957	-0.09897	-0.05145	-0.14564	-0.07252	0.02336	0.036301	0.08092	0.065	0.107805	0.087209	0.049633	-0.08629	0.134985	-0.02849	0.025686	0.020517	0.041651	-0.1385	0.054409	0.027523	0.066553	-0.10219
63.8	-0.18379	0.077356	0.029186	0.118593	-0.01896	-0.101	-0.04959	-0.13309	-0.07572	0.022413	0.039412	0.074963	0.065914	0.087762	0.083618	0.045711	-0.09363	0.148866	-0.03548	0.037486	0.015931	0.035582	-0.14773	0.061406	0.016347	0.068403	-0.10557
64	-0.18632	0.078007	0.02553	0.118463	-0.0235	-0.10124	-0.05375	-0.12913	-0.06934	0.018625	0.041468	0.077701	0.061494	0.098206	0.096627	0.048162	-0.0953	0.135525	-0.02821	0.03557	0.01753	0.036585	-0.14703	0.068959	0.024048	0.065687	-0.107
64.2	-0.19272	0.07402	0.023943	0.121099	-0.02812	-0.0996	-0.05014	-0.14481	-0.08317	0.019208	0.038164	0.074364	0.063006	0.102797	0.098851	0.044516	-0.1006	0.145537	-0.03912	0.035966	0.01601	0.042242	-0.14706	0.061523	0.023917	0.060524	-0.10448
64.4	-0.19047	0.074537	0.021541	0.117384	-0.02943	-0.10326	-0.06142	-0.1212	-0.06771	0.016578	0.04296	0.076105	0.065038	0.104927	0.096171	0.04368	-0.10091	0.140012	-0.02485	0.031028	0.009741	0.042348	-0.14576	0.065243	0.019709	0.075969	-0.1116
64.6	-0.19298	0.074987	0.024165	0.121278	-0.03001	-0.10077	-0.05656	-0.13891	-0.07372	0.01657	0.044055	0.075547	0.06587	0.112719	0.095629	0.037791	-0.10148	0.138941	-0.0232	0.037138	0.009349	0.027097	-0.14644	0.069805	0.018482	0.066535	-0.1123
64.8	-0.19882	0.073593	0.018462	0.129011	-0.03678	-0.10193	-0.06015	-0.13522	-0.06509	0.019485	0.034751	0.078736	0.066553	0.106728	0.090609	0.036914	-0.10108	0.145646	-0.02305	0.029132	0.014541	0.036323	-0.14552	0.067757	0.011955	0.075189	-0.11114
65	-0.19497	0.07986	0.017622	0.114174	-0.04126	-0.10257	-0.05399	-0.13429	-0.07343	0.013985	0.044781	0.079926	0.061973	0.090431	0.093676	0.045497	-0.10363	0.138526	-0.02233	0.02791	0.014091	0.030867	-0.15033	0.06869	0.022397	0.063946	-0.11304
65.2	-0.20297	0.08152	0.023349	0.1217	-0.04669	-0.10517	-0.06231	-0.12533	-0.07558	0.013602	0.04343	0.083591	0.0735	0.102616	0.091033	0.040168	-0.10103	0.14741	-0.02403	0.036038	0.01904	0.042109	-0.14067	0.068582	-0.0008	0.070464	-0.1136
65.4	-0.19739	0.083177	0.022715	0.128234	-0.0462	-0.10574	-0.06792	-0.11921	-0.07593	0.01392	0.043415	0.078567	0.067092	0.100787	0.095631	0.042983	-0.09927	0.142587	-0.02714	0.036123	0.017823	0.034939	-0.15451	0.068305	0.00044	0.062709	-0.10516
65.6	-0.19864	0.07889	0.022904	0.123881	-0.03712	-0.10848	-0.06362	-0.13297	-0.06848	0.012414	0.040256	0.081198	0.064623	0.098893	0.094394	0.043157	-0.10656	0.144757	-0.02606	0.040063	0.018828	0.032392	-0.15144	0.065319	-0.00768	0.059616	-0.10479
65.8	-0.20239	0.084038	0.014783	0.12684	-0.04094	-0.10789	-0.06155	-0.12278	-0.07394	0.0151	0.043276	0.083233	0.057072	0.0902	0.099435	0.041019	-0.10599	0.151307	-0.02714	0.045911	0.019994	0.028244	-0.14826	0.066538	0.004948	0.055001	-0.10527
66	-0.20386	0.076591	0.0193	0.132134	-0.04537	-0.10735	-0.06202	-0.12167	-0.08604	0.017258	0.045351	0.085789	0.053836	0.096724	0.1007	0.037788	-0.10642	0.13981	-0.026	0.048734	0.017051	0.031074	-0.15773	0.065812	0.001145	0.055491	-0.10229
66.2	-0.20136	0.086028	0.018122	0.132905	-0.04717	-0.11102	-0.05475	-0.11879	-0.08052	0.009528	0.038751	0.081264	0.050933	0.086884	0.097866	0.035659	-0.10482	0.131227	-0.02374	0.045124	0.019637	0.035445	-0.16183	0.059144	-0.00587	0.056355	-0.10351
66.4	-0.20963	0.085799	0.017941	0.131848	-0.04776	-0.11379	-0.05119	-0.1141	-0.07699	0.009693	0.035043	0.081269	0.052667	0.088668	0.103568	0.03336	-0.11758	0.131088	-0.02569	0.04763	0.014511	0.030972	-0.1513	0.064027	-0.01208	0.057702	-0.10353
66.6	-0.20196	0.086356	0.016522	0.144189	-0.05014	-0.11887	-0.05747	-0.11673	-0.07144	0.012825	0.036859	0.081348	0.053565	0.077801	0.096989	0.033399	-0.11569	0.120769	-0.02421	0.037176	0.009061	0.033245	-0.15215	0.061541	-0.0102	0.05685	-0.10629
66.8	-0.19775	0.084047	0.019617	0.133485	-0.05223	-0.11614	-0.05939	-0.11978	-0.06888	0.00916	0.039115	0.083051	0.048143	0.082205	0.097853	0.028312	-0.10968	0.115989	-0.03387	0.040461	0.0105	0.036733	-0.15187	0.059991	-0.01068	0.057975	-0.10667
67	-0.19994	0.080327	0.012305	0.12844	-0.05369	-0.11669	-0.06195	-0.11439	-0.06695	0.006856	0.047648	0.081188	0.052899	0.078147	0.100542	0.024228	-0.11533	0.121973	-0.02346	0.034713	0.01876	0.025998	-0.15288	0.061355	-0.00651	0.050824	-0.10702
67.2	-0.20165	0.083647	0.013172	0.127778	-0.05794	-0.12215	-0.06616	-0.11919	-0.07143	0.013566	0.040761	0.08151	0.055422	0.083951	0.098076	0.028276	-0.11753	0.116046	-0.02444	0.035664	0.024	0.026022	-0.14795	0.055075	-0.01467	0.052423	-0.11395
67.4	-0.20857	0.079928	0.009616	0.12653	-0.05829	-0.12421	-0.04732	-0.10747	-0.07815	0.005643	0.034231	0.080962	0.051705	0.089728	0.099828	0.035479	-0.12001	0.108136	-0.02797	0.04187	0.029571	0.030544	-0.15922	0.051617	-0.00538	0.05167	-0.10788
67.6	-0.20543	0.081958	0.012522	0.128726	-0.06087	-0.12042	-0.06276	-0.10756	-0.08687	0.013087	0.039738	0.080306	0.052098	0.071519	0.097573	0.03686	-0.12367	0.114291	-0.0185	0.034912	0.020466	0.02947	-0.16254	0.051027	-0.00705	0.044301	-0.11399
67.8	-0.19698	0.088138	0.013901	0.127256	-0.06442	-0.11717	-0.06191	-0.10378	-0.08082	0.006605	0.046984	0.082818	0.05133	0.080431	0.108693	0.032496	-0.11794	0.104101	-0.0259	0.037482	0.016476	0.017181	-0.15526	0.046555	-0.00299	0.049309	-0.11208
68	-0.19814	0.077955	0.01187	0.128996	-0.06354	-0.12651	-0.0581	-0.10638	-0.0785	0.002313	0.049088	0.082928	0.051108	0.067423	0.105203	0.029276	-0.11944	0.108816	-0.0241	0.035154	0.013616	0.01816	-0.14917	0.049208	-0.00196	0.038072	-0.11112
68.2	-0.2016	0.080405	0.011936	0.124243	-0.06597	-0.12409	-0.06618	-0.11169	-0.09396	0.001918	0.057965	0.082734	0.049841	0.067127	0.103925	0.033391	-0.12457	0.117184	-0.02078	0.034643	0.003114	0.017875	-0.15949	0.050939	0.006009	0.044068	-0.10698
68.4	-0.19446	0.080656	0.008796	0.127395	-0.06949	-0.12541	-0.06553	-0.10928	-0.08829	-0.00245	0.036598	0.085342	0.047569	0.066264	0.104675	0.029729	-0.12494	0.114441	-0.01795	0.038095	0.020287	0.021339	-0.146	0.050456	-0.00146	0.038209	-0.11414
68.6	-0.18967	0.075952	0.013977	0.120859	-0.06832	-0.12899	-0.06504	-0.10571	-0.08869	-0.00591	0.042428	0.085857	0.048159	0.078153	0.098938	0.033168	-0.13004	0.127275	-0.02517	0.038816	0.019694	0.022881	-0.15917	0.057187	0.000751	0.043378	-0.1176
68.8	-0.19254	0.077174	0.010817	0.104727	-0.06577	-0.12681	-0.06339	-0.09944	-0.09488	-0.00205	0.043209	0.087807	0.049004	0.071739	0.101228	0.03067	-0.12507	0.129209	-0.02917	0.041302	0.010295	0.014713	-0.15506	0.048028	-0.01624	0.054524	-0.11544
69	-0.19447	0.079978	0.010546	0.123529	-0.06708	-0.12714	-0.06253	-0.11108	-0.0957	-0.00426	0.041599	0.082587	0.045506	0.070454	0.10122	0.032356	-0.12367	0.136133	-0.02458	0.042909	0.008763	0.018873	-0.15873	0.044967	-0.00015	0.051408	-0.11703
69.2	-0.19162	0.0822	0.005354	0.117782	-0.07038	-0.1315	-0.06332	-0.11691	-0.09387	-0.00539	0.045542	0.081038	0.052774	0.065836	0.097989	0.027226	-0.13253	0.143064	-0.02077	0.0418	0.006089	0.017953	-0.15884	0.051521	-0.00443	0.054125	-0.12121
69.4	-0.18921	0.078468	0.010459	0.123474	-0.07515	-0.12736	-0.06266	-0.10903	-0.0974	-0.0041	0.044836	0.081499	0.049593	0.065913	0.102816	0.026617	-0.12726	0.135417	-0.02346	0.036335	0.004503	0.012941	-0.15942	0.059341	-0.01621	0.046208	-0.11948
69.6	-0.1875	0.078007	0.007198	0.121694	-0.07152	-0.12167	-0.05475	-0.09939	-0.09934	-0.00686	0.042802	0.08316	0.051557	0.055211	0.108436	0.028351	-0.13408	0.137798	-0.02904	0.041093	0.009253	0.016518	-0.16013	0.048479	-0.00431	0.051832	-0.12053
69.8	-0.19517	0.073206	0.006751	0.127295	-0.06841	-0.12648	-0.06639	-0.09803	-0.10816	-0.00318	0.044742	0.079103	0.051866	0.052476	0.107211	0.029684	-0.13557	0.148406	-0.02285	0.032885	0.003908	0.014217	-0.15772	0.049211	-0.01106	0.049039	-0.11672
70	-0.19604	0.074485	0.005149	0.133613	-0.0678	-0.13544	-0.06718	-0.09755	-0.09715	-0.00266	0.044852	0.081258	0.050448	0.048319	0.108485	0.025928	-0.13377	0.145052	-0.02323	0.039206	0.002792	0.006042	-0.15963	0.047984	-0.00989	0.05312	-0.11775
70.2	-0.19743	0.070544	0.006166	0.131229	-0.06894	-0.13194	-0.05857	-0.10888	-0.11314	-0.00209	0.04656	0.085549	0.049426	0.052575	0.109145	0.027885	-0.13623	0.150021	-0.01862	0.0419	0.001039	-0.00276	-0.15535	0.050133	-0.0171	0.044672	-0.11979
70.4	-0.20633	0.072923	0.007754	0.126427	-0.06811	-0.12705	-0.06629	-0.10273	-0.11064	-0.00242	0.052396	0.07889	0.054534	0.040039	0.110091	0.028466	-0.13517	0.148098	-0.00582	0.045475	-0.00109	0.004599	-0.16162	0.05668	-0.0089	0.044439	-0.12159
70.6	-0.19375	0.071534	-0.0013	0.130649	-0.06706	-0.13284	-0.0614	-0.12302	-0.0966	-0.00089	0.059364	0.088137	0.050694	0.050099	0.110132	0.029581	-0.1369	0.154574	-0.02075	0.037812	-0.00341	0.002275	-0.15977	0.048413	-0.01378	0.055234	-0.12263
70.8	-0.19821	0.076334	0.00799	0.117105	-0.06953	-0.13745	-0.06578	-0.10647	-0.11896	-0.00312	0.050233	0.087593	0.047788	0.036453	0.107401	0.031457	-0.13798	0.16826	-0.02517	0.036807	-0.00751	0.011216	-0.16202	0.056181	-0.00551	0.053483	-0.12315
71	-0.19929	0.071741	0.009462	0.117873	-0.06707	-0.13435	-0.06609	-0.11334	-0.12172	-0.00114	0.049976	0.089217	0.04941	0.033587	0.105467	0.028644	-0.13821	0.166043	-0.02111	0.04298	-0.00704	0.005682	-0.16595	0.055867	-0.00932	0.053979	-0.12407
71.2	-0.19812	0.071165	0.004931	0.124765	-0.06857	-0.13563	-0.06724	-0.11312	-0.12143	-0.0104	0.041638	0.080934	0.047121	0.033889	0.099857	0.031691	-0.13639	0.164352	-0.031	0.043709	-0.00331	0.003162	-0.16597	0.05271	-0.00894	0.043767	-0.12002
71.4	-0.20312	0.070579	0.000954	0.117202	-0.06879	-0.13315	-0.07032	-0.11785	-0.11586	-0.01406	0.056976	0.081525	0.05111	0.026975	0.101391	0.034232	-0.13368	0.17022	-0.02002	0.040343	-0.00145	0.002251	-0.16439	0.050856	-0.0069	0.03902	-0.1194
71.6	-0.19793	0.070676	-0.00116	0.114055	-0.072	-0.13671	-0.06492	-0.12522	-0.11145	-0.01325	0.066088	0.077812	0.047814	0.025581	0.099451	0.03558	-0.13693	0.17224	-0.03377	0.04129	-0.00302	-0.00181	-0.14775	0.050549	-0.0035	0.045888	-0.11816
71.8	-0.19613	0.069557	0.00425	0.124167	-0.07355	-0.13856	-0.07081	-0.11082	-0.11115	-0.01278	0.047581	0.080905	0.054266	0.02283	0.108584	0.033671	-0.13628	0.177222	-0.033	0.038109	-0.00278	-0.00219	-0.16885	0.046255	-0.01213	0.040141	-0.12155
72	-0.20516	0.064939	0.006403	0.119598	-0.07243	-0.13867	-0.06269	-0.12057	-0.11316	-0.01862	0.043767	0.082593	0.048901	0.026168	0.101911	0.0275	-0.13519	0.182071	-0.02605	0.0392	-0.00786	0.001819	-0.15694	0.052152	-0.00567	0.041499	-0.11895
72.2	-0.20491	0.069964	0.008012	0.116345	-0.0713	-0.13278	-0.06467	-0.12522	-0.11666	-0.01598	0.047976	0.080149	0.050516	0.016614	0.107516	0.029408	-0.13599	0.181625	-0.0234	0.032888	-0.00233	0.010905	-0.16089	0.052776	-0.02052	0.044364	-0.12064
72.4	-0.20309	0.068299	0.004788	0.113071	-0.07355	-0.14081	-0.07142	-0.13017	-0.12386	-0.01613	0.04411	0.084269	0.052103	0.033147	0.102016	0.028255	-0.14082	0.177585	-0.02464	0.03818	0.002109	0.011908	-0.16461	0.048963	-0.00822	0.036451	-0.1259
72.6	-0.20382	0.064453	-0.00246	0.104138	-0.0757	-0.143	-0.06729	-0.11457	-0.12209	-0.02363	0.045403	0.083118	0.049607	0.031253	0.102216	0.035972	-0.14446	0.177277	-0.02759	0.031904	-0.00819	0.019932	-0.16795	0.049152	-0.01239	0.040006	-0.11902
72.8	-0.20686	0.060607	-0.00131	0.110119	-0.07335	-0.14322	-0.06389	-0.11977	-0.12409	-0.03035	0.050601	0.081198	0.051029	0.032467	0.10403	0.023915	-0.14171	0.174545	-0.0288	0.032721	-0.00442	0.010915	-0.15667	0.054725	-0.03154	0.053008	-0.12648
73	-0.21345	0.064516	0.004519	0.108892	-0.07082	-0.13923	-0.07124	-0.11335	-0.12316	-0.02637	0.054372	0.079456	0.048893	0.030808	0.106347	0.024508	-0.14317	0.177771	-0.02733	0.033668	-0.01082	0.008706	-0.16787	0.043264	-0.01679	0.053628	-0.12339
73.2	-0.20834	0.06138	0.010956	0.108512	-0.07703	-0.14252	-0.06953	-0.1193	-0.1288	-0.03326	0.054269	0.082302	0.057558	0.028293	0.106454	0.021425	-0.14478	0.176453	-0.0281	0.030568	-0.00842	0.010352	-0.16328	0.047963	-0.0184	0.045318	-0.12601
73.4	-0.19922	0.055028	0.009666	0.108755	-0.06593	-0.14444	-0.07682	-0.11409	-0.13118	-0.03333	0.047794	0.077361	0.053336	0.021512	0.105252	0.020535	-0.14611	0.17521	-0.02403	0.033104	0.00056	0.009597	-0.17457	0.047404	-0.02518	0.051505	-0.12631
73.6	-0.20377	0.055182	0.012354	0.100065	-0.07301	-0.145	-0.06947	-0.11818	-0.12352	-0.03777	0.058554	0.076052	0.053759	0.017712	0.106438	0.021034	-0.15096	0.168552	-0.03267	0.029001	-0.00432	0.01745	-0.16275	0.048748	-0.01138	0.050718	-0.12792
73.8	-0.20595	0.060757	0.016117	0.109256	-0.07514	-0.14063	-0.07389	-0.12617	-0.12117	-0.04029	0.05103	0.077967	0.054818	0.027299	0.110891	0.016598	-0.14775	0.168126	-0.02616	0.025221	-0.01669	0.015465	-0.1636	0.045814	-0.0092	0.053579	-0.12006
74	-0.20915	0.058921	0.014981	0.107303	-0.07282	-0.14571	-0.07328	-0.12011	-0.13158	-0.04233	0.048146	0.08203	0.050671	0.023088	0.108582	0.017237	-0.15412	0.172032	-0.02615	0.02443	-0.02503	0.008433	-0.17017	0.044365	-0.0166	0.044525	-0.12077
74.2	-0.20786	0.053108	0.009415	0.112476	-0.0748	-0.1385	-0.06777	-0.11281	-0.13697	-0.0473	0.04657	0.080391	0.047996	0.016608	0.110592	0.018326	-0.14956	0.171288	-0.02922	0.027532	-0.01343	0.008057	-0.16445	0.042148	-0.01296	0.0521	-0.12718
74.4	-0.21496	0.052224	0.009072	0.110729	-0.06637	-0.13568	-0.07236	-0.12102	-0.14669	-0.04134	0.056082	0.082663	0.051191	0.019228	0.102092	0.019906	-0.15293	0.168541	-0.02695	0.027275	-0.01944	0.007975	-0.16221	0.045802	-0.00562	0.054483	-0.12005
74.6	-0.21392	0.059379	0.003266	0.115808	-0.0719	-0.1412	-0.08773	-0.12655	-0.13902	-0.03867	0.056058	0.076259	0.0461	0.021336	0.102692	0.019906	-0.15366	0.173006	-0.02822	0.02512	-0.015	0.007213	-0.16771	0.045725	-0.00822	0.050114	-0.12254
74.8	-0.22146	0.063783	0.006659	0.10771	-0.07017	-0.14273	-0.08544	-0.11924	-0.14127	-0.04514	0.05952	0.08958	0.050962	0.016158	0.104244	0.020281	-0.15127	0.165268	-0.03493	0.024674	-0.01484	-0.00424	-0.17409	0.045755	-0.01568	0.05774	-0.12554
75	-0.22297	0.061471	0.002964	0.113867	-0.07684	-0.13919	-0.07702	-0.11358	-0.15385	-0.04773	0.044416	0.084972	0.045747	0.016806	0.099276	0.018756	-0.15684	0.175155	-0.03295	0.02913	-0.01865	0.003037	-0.17352	0.045586	0.007288	0.058287	-0.12988
75.2	-0.22369	0.059836	0.005478	0.113214	-0.07539	-0.14171	-0.08385	-0.11605	-0.15738	-0.04646	0.036382	0.088101	0.049754	0.019101	0.09894	0.023405	-0.15096	0.17296	-0.03746	0.025399	-0.01325	0.006355	-0.1725	0.039588	-0.00569	0.052957	-0.12653
75.4	-0.22665	0.055545	0.006369	0.109739	-0.07442	-0.14376	-0.0873	-0.12459	-0.15774	-0.04685	0.042397	0.086757	0.046613	0.01059	0.095233	0.02509	-0.15688	0.176832	-0.03385	0.026396	-0.00888	0.001757	-0.16812	0.046386	0.006389	0.045765	-0.12872
75.6	-0.2323	0.056804	0.00282	0.118116	-0.07884	-0.14498	-0.0828	-0.12338	-0.16339	-0.0464	0.041417	0.079142	0.044895	-0.00791	0.098059	0.028361	-0.1623	0.186571	-0.03482	0.02704	-0.01529	-0.00341	-0.16801	0.039475	0.00348	0.049072	-0.12764
75.8	-0.23329	0.058149	0.00164	0.104651	-0.07622	-0.14166	-0.07598	-0.11756	-0.17059	-0.04732	0.044838	0.081621	0.048398	-0.00219	0.111287	0.024596	-0.15669	0.179408	-0.02667	0.03485	-0.0139	0.001124	-0.1703	0.045437	0.007973	0.055709	-0.12672
76	-0.23062	0.056801	0.004797	0.1072	-0.07794	-0.14586	-0.08264	-0.12725	-0.17078	-0.05093	0.037743	0.078607	0.044982	0.005434	0.102455	0.027549	-0.15824	0.174654	-0.03204	0.030901	-0.01355	0.008986	-0.17564	0.050123	0.010247	0.057291	-0.12961
76.2	-0.23271	0.058959	-0.00438	0.10888	-0.08032	-0.14125	-0.076	-0.12068	-0.16303	-0.04631	0.044167	0.082388	0.04313	0.00824	0.10897	0.024091	-0.15978	0.188179	-0.02706	0.030978	-0.01073	0.013023	-0.18367	0.038357	0.002323	0.053691	-0.12371
76.4	-0.2389	0.056884	-0.00554	0.109277	-0.08242	-0.14451	-0.08147	-0.12098	-0.15532	-0.04591	0.043061	0.080084	0.043249	0.003506	0.10196	0.021506	-0.16184	0.186016	-0.02336	0.025854	-0.00425	-0.00303	-0.17363	0.046688	-0.00146	0.053674	-0.12433
76.6	-0.23561	0.054979	0.004826	0.10303	-0.0824	-0.14485	-0.08815	-0.11369	-0.16399	-0.04832	0.038521	0.080548	0.044025	-0.00211	0.10008	0.02539	-0.15994	0.192818	-0.0315	0.028758	-0.00662	0.001289	-0.17872	0.041345	0.008457	0.048289	-0.12133
76.8	-0.233	0.053696	-0.00099	0.107033	-0.07747	-0.14817	-0.08508	-0.13226	-0.17682	-0.04997	0.036346	0.079001	0.039759	0.002655	0.102102	0.022843	-0.15954	0.190718	-0.02506	0.024114	-0.00616	-0.00861	-0.17475	0.038508	-0.00256	0.05328	-0.13525
77	-0.23897	0.054458	-0.00012	0.110383	-0.07839	-0.14793	-0.08522	-0.11687	-0.17211	-0.04812	0.039741	0.081357	0.043337	-0.00166	0.103195	0.019704	-0.15445	0.187302	-0.02934	0.020511	-0.01348	-0.00549	-0.18419	0.038687	-0.00393	0.053777	-0.12386
77.2	-0.23552	0.053147	-0.00073	0.105326	-0.07709	-0.14942	-0.08494	-0.12222	-0.17307	-0.04978	0.054298	0.077424	0.03964	-0.0007	0.098441	0.015405	-0.15808	0.18779	-0.03152	0.027066	-0.00763	-0.0201	-0.1807	0.033763	0.008689	0.05963	-0.11397
77.4	-0.2433	0.055285	0.001449	0.106896	-0.07604	-0.15293	-0.09374	-0.12266	-0.16959	-0.05216	0.069442	0.079104	0.034337	0.002112	0.09506	0.01908	-0.15887	0.181761	-0.02639	0.023543	-0.01184	-0.00761	-0.18428	0.032666	-0.01105	0.056504	-0.12152
77.6	-0.22947	0.05146	-0.0006	0.113955	-0.07334	-0.15087	-0.08184	-0.11682	-0.1634	-0.05538	0.04549	0.081176	0.043674	0.005966	0.098426	0.018506	-0.15906	0.192082	-0.03808	0.015224	-0.01369	-0.00798	-0.17615	0.030413	0.001714	0.054234	-0.12271
77.8	-0.22911	0.049546	0.002265	0.118131	-0.08239	-0.15117	-0.09392	-0.11584	-0.16945	-0.06125	0.045015	0.082915	0.04609	0.001898	0.097676	0.025989	-0.15797	0.185706	-0.04899	0.019718	-0.00387	-0.00453	-0.18984	0.028474	-0.00311	0.052314	-0.12468
78	-0.23354	0.046956	-0.00082	0.120324	-0.08645	-0.15174	-0.09041	-0.12003	-0.17585	-0.06544	0.040351	0.083568	0.046253	-0.01353	0.09211	0.023227	-0.15442	0.17461	-0.05601	0.018192	-0.00749	-0.00918	-0.17688	0.028959	-0.00549	0.051355	-0.12778
78.2	-0.23605	0.046329	-0.00562	0.110526	-0.08417	-0.14762	-0.08566	-0.12237	-0.16421	-0.0635	0.042138	0.07933	0.045877	0.002128	0.094864	0.017103	-0.15414	0.17024	-0.06079	0.015711	-0.00426	-0.00664	-0.18142	0.02622	-0.00978	0.051112	-0.12787
78.4	-0.23697	0.048866	-0.00299	0.105693	-0.08923	-0.13405	-0.08329	-0.10764	-0.17173	-0.06152	0.045976	0.081398	0.042783	-0.00647	0.091188	0.018423	-0.15904	0.144927	-0.06754	0.019313	-0.00138	-0.00778	-0.17838	0.032221	-0.02161	0.047397	-0.1313
78.6	-0.24079	0.044254	-0.00589	0.10614	-0.08495	-0.13121	-0.08805	-0.11339	-0.16911	-0.0677	0.043427	0.079326	0.041297	0.002233	0.091118	0.020273	-0.16458	0.139715	-0.06395	0.018009	-0.01177	-0.00952	-0.18429	0.032858	0.002476	0.048938	-0.12735
78.8	-0.23564	0.040203	0.003551	0.10747	-0.08355	-0.12892	-0.09322	-0.12332	-0.17355	-0.06696	0.050336	0.083764	0.039684	-0.01264	0.091724	0.016611	-0.16491	0.125859	-0.05567	0.017527	-0.00236	-0.0086	-0.18955	0.027647	-0.00796	0.046369	-0.13011
79	-0.23334	0.047884	-0.00551	0.108451	-0.08506	-0.12708	-0.10192	-0.10275	-0.18277	-0.06936	0.060933	0.088633	0.039999	-0.01448	0.088094	0.022193	-0.16878	0.122801	-0.04712	0.016398	-0.00866	-0.00326	-0.1791	0.024727	-0.00609	0.048714	-0.12905
79.2	-0.23816	0.043232	0.002361	0.110644	-0.08691	-0.12527	-0.0934	-0.11297	-0.17524	-0.0653	0.049811	0.085889	0.035125	-0.01385	0.08883	0.023128	-0.17043	0.115463	-0.04956	0.010898	-0.00899	-0.01063	-0.18799	0.029587	-0.01329	0.041501	-0.13116
79.4	-0.23388	0.044478	0.002841	0.117287	-0.08124	-0.11823	-0.10293	-0.11653	-0.17867	-0.06945	0.046235	0.086636	0.033495	-0.01787	0.099235	0.01995	-0.17038	0.122165	-0.04721	0.010684	-0.00342	-0.00702	-0.19155	0.032505	-0.00433	0.040635	-0.1307
79.6	-0.23358	0.048624	-0.0002	0.118906	-0.0852	-0.11587	-0.09714	-0.11606	-0.18813	-0.06596	0.054717	0.084319	0.03682	-0.01153	0.100812	0.018387	-0.1653	0.116649	-0.04198	0.015028	-0.00677	-0.00903	-0.18123	0.027145	0.002906	0.042052	-0.13198
79.8	-0.23011	0.040956	-0.00596	0.111729	-0.08099	-0.11632	-0.09769	-0.10566	-0.18051	-0.06581	0.046745	0.078754	0.030993	-0.01567	0.10196	0.01541	-0.17029	0.11812	-0.03882	0.014195	-0.00329	-0.01024	-0.17984	0.025662	-0.01304	0.040029	-0.13216
80	-0.22878	0.041888	-0.007	0.108299	-0.0786	-0.11805	-0.09176	-0.12168	-0.18368	-0.06634	0.041132	0.085449	0.035545	-0.01728	0.099562	0.016849	-0.17007	0.118603	-0.03852	0.008868	0.011651	-0.00189	-0.19323	0.033455	0.014273	0.036226	-0.12684
80.2	-0.22934	0.03982	-0.00812	0.10419	-0.08435	-0.11355	-0.09267	-0.11245	-0.16533	-0.07457	0.038567	0.091415	0.029921	-0.01706	0.098536	0.01526	-0.16826	0.123236	-0.03608	0.013193	0.00745	-0.01489	-0.19376	0.031269	0.011207	0.038059	-0.12877
80.4	-0.2267	0.042756	-0.00717	0.109007	-0.08458	-0.11631	-0.08992	-0.11573	-0.16705	-0.07515	0.042553	0.084212	0.032662	-0.02422	0.09769	0.012831	-0.17294	0.125273	-0.03729	0.015807	0.010432	-0.00665	-0.19099	0.025532	0.000579	0.044859	-0.13076
80.6	-0.23166	0.042446	-0.00705	0.10662	-0.09244	-0.11841	-0.08999	-0.1079	-0.18305	-0.07165	0.041707	0.088016	0.030589	-0.02496	0.096222	0.010583	-0.17886	0.129159	-0.03233	0.011269	0.004507	-1.2e-05	-0.18105	0.032771	0.002355	0.046942	-0.13327
80.8	-0.23017	0.043634	-0.00594	0.100739	-0.09308	-0.11591	-0.08914	-0.11469	-0.19005	-0.07354	0.042694	0.075359	0.02977	-0.02648	0.095996	0.012423	-0.17862	0.131058	-0.02387	0.012722	0.007107	-0.00685	-0.17898	0.033653	0.003204	0.046903	-0.12982
81	-0.23662	0.04462	-0.00563	0.108284	-0.08846	-0.11621	-0.08846	-0.11751	-0.17965	-0.07794	0.031328	0.074975	0.025677	-0.02166	0.09488	0.012071	-0.17811	0.138279	-0.02784	0.002559	0.007179	-0.00845	-0.17604	0.031556	-0.00113	0.05187	-0.13205
81.2	-0.23188	0.040649	-0.01501	0.104642	-0.09589	-0.11833	-0.08867	-0.11168	-0.18674	-0.07184	0.039666	0.074293	0.024958	-0.01701	0.091485	0.004917	-0.17877	0.141729	-0.02352	0.00979	0.005262	-0.006	-0.18707	0.038599	0.005995	0.058927	-0.12288
81.4	-0.22804	0.042914	-0.00927	0.110705	-0.07972	-0.11697	-0.08867	-0.11313	-0.19768	-0.07598	0.03524	0.069326	0.027565	-0.02293	0.095142	0.009216	-0.17681	0.141083	-0.0275	0.011909	0.001888	-0.0114	-0.18618	0.040938	0.02057	0.059861	-0.12602
81.6	-0.22964	0.041451	-0.00215	0.104223	-0.08579	-0.11481	-0.08863	-0.1189	-0.19835	-0.07512	0.051315	0.067521	0.030187	-0.01724	0.091487	0.009441	-0.18171	0.147844	-0.02398	-0.00115	0.006157	-0.00915	-0.18813	0.039301	0.011726	0.067654	-0.13037
81.8	-0.23625	0.042092	-0.00354	0.097954	-0.08168	-0.11451	-0.09853	-0.10982	-0.18466	-0.07542	0.049241	0.072172	0.034455	-0.02525	0.088704	0.005913	-0.17972	0.147272	-0.02898	0.009292	-0.00955	-0.01128	-0.18387	0.042667	0.020338	0.064396	-0.12289
82	-0.22367	0.043805	-0.00026	0.099148	-0.08265	-0.11245	-0.09578	-0.11547	-0.1676	-0.08482	0.048647	0.073134	0.028623	-0.02491	0.090522	0.004143	-0.18014	0.152091	-0.02495	0.01034	-0.00377	-0.01356	-0.1829	0.047564	0.008234	0.064539	-0.12653
82.2	-0.22258	0.046033	-0.00475	0.10439	-0.08458	-0.11565	-0.10311	-0.11847	-0.16757	-0.07885	0.04554	0.070459	0.029546	-0.02612	0.087139	0.002537	-0.1811	0.151444	-0.0157	0.011413	-0.00299	-0.00978	-0.1874	0.042965	0.010351	0.069018	-0.1272
82.4	-0.22454	0.042407	-0.00665	0.093577	-0.08581	-0.11815	-0.10278	-0.1155	-0.17667	-0.07471	0.06638	0.069703	0.031642	-0.00923	0.092646	0.004701	-0.17952	0.149013	-0.02052	0.010275	-0.00272	-0.01407	-0.18845	0.046756	0.006842	0.073519	-0.1237
82.6	-0.22474	0.043255	-0.00681	0.10645	-0.085	-0.1171	-0.09551	-0.11774	-0.17264	-0.08175	0.053335	0.060513	0.031688	-0.0089	0.09405	0.014287	-0.18122	0.159548	-0.01732	0.011785	-0.00047	-0.00812	-0.18485	0.048146	-0.00098	0.066752	-0.1256
82.8	-0.21984	0.04318	-0.00727	0.101459	-0.0858	-0.11373	-0.09718	-0.11484	-0.1788	-0.07974	0.048472	0.065662	0.028069	-0.01231	0.090349	0.01196	-0.18197	0.154894	-0.01932	0.008271	-0.00411	-0.00743	-0.18953	0.050139	0.006299	0.070772	-0.1235
83	-0.22478	0.040796	-0.00847	0.096618	-0.08644	-0.1149	-0.0991	-0.1235	-0.18447	-0.08121	0.038265	0.06053	0.029993	-0.00656	0.09829	0.013411	-0.18058	0.161229	-0.01009	0.014853	-0.01125	-0.0082	-0.18431	0.053851	0.007561	0.06426	-0.12368
83.2	-0.22337	0.041442	-0.00412	0.092016	-0.08951	-0.10989	-0.09755	-0.11401	-0.17275	-0.07412	0.036914	0.059866	0.029141	0.006005	0.105927	0.01192	-0.18032	0.160111	-0.02248	0.024552	-0.00969	-0.01085	-0.20013	0.054707	0.003358	0.068427	-0.12674
83.4	-0.22406	0.036976	-0.00815	0.09553	-0.08732	-0.11001	-0.09864	-0.11684	-0.19247	-0.07606	0.045787	0.068821	0.024584	0.000146	0.105632	0.011379	-0.18561	0.161591	-0.01645	0.017903	-0.00139	-0.01712	-0.18623	0.058442	0.0079	0.07477	-0.1269
83.6	-0.22427	0.039273	-0.00632	0.103789	-0.08595	-0.10302	-0.09244	-0.11238	-0.18708	-0.07513	0.044275	0.062421	0.024095	0.014692	0.105856	0.008002	-0.18457	0.158245	-0.01378	0.01898	0.000151	-0.01353	-0.20056	0.05961	0.007735	0.081372	-0.13057
83.8	-0.2274	0.048044	-0.00513	0.095746	-0.08385	-0.10482	-0.09559	-0.12058	-0.18134	-0.07553	0.040677	0.064765	0.024952	0.014538	0.101739	0.005012	-0.19069	0.159646	-0.02242	0.02119	-0.00485	-0.01748	-0.19422	0.068753	0.015079	0.085985	-0.12854
84	-0.22692	0.042491	-0.00427	0.101842	-0.08593	-0.10418	-0.09379	-0.09962	-0.18961	-0.07576	0.046694	0.059445	0.018722	0.013956	0.103745	0.005271	-0.18949	0.16454	-0.01531	0.010744	-0.00215	-0.01386	-0.19529	0.069678	0.013873	0.082976	-0.12518
84.2	-0.22663	0.042801	0.00083	0.094513	-0.08375	-0.1064	-0.10116	-0.12335	-0.18935	-0.07394	0.050077	0.056885	0.024273	0.026031	0.10108	0.001145	-0.18547	0.1663	-0.01972	0.01528	0.002112	-0.01561	-0.197	0.075383	0.009577	0.075266	-0.13346
84.4	-0.22772	0.043731	0.006473	0.093866	-0.08783	-0.10177	-0.09637	-0.11352	-0.20535	-0.0678	0.042711	0.065502	0.025618	0.034213	0.098587	-0.00149	-0.18202	0.167723	-0.03082	0.012875	0.009273	-0.01228	-0.20192	0.073251	0.010691	0.080732	-0.13108
84.6	-0.22998	0.038762	0.014568	0.09683	-0.08299	-0.09775	-0.09296	-0.11139	-0.19711	-0.06114	0.04204	0.075115	0.02097	0.045255	0.099981	-0.00775	-0.18569	0.163847	-0.02304	0.012349	-0.00595	-0.0043	-0.1902	0.074942	0.007346	0.066799	-0.13047
84.8	-0.23065	0.039811	0.015467	0.096903	-0.08404	-0.09369	-0.09282	-0.11501	-0.20911	-0.05845	0.040016	0.081172	0.020586	0.032176	0.103896	-0.0036	-0.18862	0.162327	-0.03238	0.017586	0.001766	-0.00147	-0.19807	0.080339	0.0094	0.068476	-0.12077
85	-0.22922	0.043251	0.029263	0.100928	-0.07819	-0.09338	-0.09048	-0.11309	-0.20228	-0.05405	0.043159	0.084571	0.015893	0.043158	0.101008	0.00181	-0.18821	0.15967	-0.02652	0.014224	-0.00061	0.007432	-0.19146	0.07911	0.006105	0.070034	-0.12233
85.2	-0.22726	0.039976	0.034874	0.096851	-0.06965	-0.09476	-0.09896	-0.11432	-0.1998	-0.05989	0.046972	0.099966	0.012743	0.037013	0.101391	0.012257	-0.19356	0.153714	-0.02424	0.024015	0.001689	-0.00156	-0.20108	0.07521	0.00102	0.073524	-0.12133
85.4	-0.2336	0.036193	0.030643	0.093936	-0.07412	-0.09154	-0.10063	-0.10792	-0.19739	-0.05945	0.03621	0.105383	0.012942	0.046787	0.10069	0.020296	-0.19087	0.146807	-0.03072	0.024968	0.000503	-0.00415	-0.19964	0.080386	-0.00739	0.080859	-0.12876
85.6	-0.23094	0.036309	0.035776	0.092274	-0.07068	-0.08771	-0.09597	-0.11278	-0.1998	-0.05468	0.046575	0.109177	0.009119	0.057753	0.097029	0.019663	-0.19014	0.139995	-0.02663	0.033117	0.003015	-0.00721	-0.19401	0.08272	0.00384	0.077473	-0.12628
85.8	-0.23662	0.038691	0.037858	0.091825	-0.07365	-0.08947	-0.08739	-0.10415	-0.20554	-0.0584	0.053756	0.115954	0.013678	0.049121	0.097709	0.028841	-0.19012	0.141585	-0.02762	0.025493	-0.00822	0.000416	-0.20099	0.084086	-0.0081	0.073743	-0.12828
86	-0.23539	0.032733	0.041096	0.095624	-0.07302	-0.08915	-0.09904	-0.10917	-0.20795	-0.05318	0.072917	0.11912	0.011646	0.061817	0.100368	0.031046	-0.19007	0.141097	-0.02459	0.020654	-0.00624	-0.00158	-0.20015	0.08667	-0.00198	0.072163	-0.12965
86.2	-0.2341	0.03441	0.043718	0.093231	-0.07379	-0.0908	-0.10017	-0.11045	-0.21564	-0.05449	0.053162	0.125125	0.010188	0.058736	0.100057	0.030927	-0.19169	0.138691	-0.03231	0.025236	-0.00968	-0.00767	-0.19995	0.083908	0.008779	0.074675	-0.12837
86.4	-0.23833	0.036417	0.044457	0.102695	-0.07562	-0.09339	-0.10241	-0.11263	-0.21962	-0.05506	0.041901	0.131155	0.007313	0.066369	0.094371	0.036147	-0.19117	0.136927	-0.02297	0.027264	-0.0052	-0.01066	-0.19636	0.088707	0.008144	0.069475	-0.13082
86.6	-0.23172	0.032898	0.04493	0.095892	-0.07292	-0.08824	-0.10015	-0.11412	-0.20849	-0.05721	0.047351	0.139134	0.009686	0.072541	0.096239	0.04215	-0.19158	0.138159	-0.03123	0.027061	-0.00538	-0.01029	-0.20239	0.084776	0.003518	0.070286	-0.13103
86.8	-0.22023	0.033215	0.0526	0.0906	-0.07346	-0.08795	-0.09819	-0.10228	-0.22014	-0.05951	0.041171	0.142017	0.010629	0.063832	0.094948	0.042121	-0.19503	0.128391	-0.03634	0.025453	-0.00629	-0.00292	-0.20054	0.092319	0.018783	0.070141	-0.13064
87	-0.22541	0.032411	0.051266	0.09539	-0.07431	-0.08766	-0.10014	-0.11889	-0.2165	-0.0504	0.044457	0.143452	0.007708	0.076126	0.093579	0.042592	-0.19598	0.144163	-0.03881	0.032378	-0.00636	-0.0115	-0.19692	0.087618	0.003155	0.070627	-0.13264
87.2	-0.22426	0.033128	0.054293	0.096177	-0.07117	-0.08488	-0.10079	-0.10643	-0.22352	-0.04389	0.043544	0.15289	0.012444	0.073331	0.10295	0.041185	-0.18956	0.139743	-0.03393	0.028868	-0.0123	-0.00831	-0.20559	0.090006	0.01968	0.067994	-0.13367
87.4	-0.22641	0.033119	0.060379	0.083936	-0.07768	-0.08933	-0.09708	-0.1167	-0.22128	-0.04753	0.040955	0.149932	0.007931	0.079932	0.095342	0.04851	-0.1955	0.144355	-0.04518	0.023972	-0.01042	-0.01074	-0.20141	0.093653	0.006404	0.063575	-0.1375
87.6	-0.22398	0.031682	0.063088	0.09789	-0.07756	-0.08745	-0.1069	-0.10519	-0.2236	-0.04332	0.049665	0.147525	0.006131	0.071997	0.101368	0.040416	-0.19456	0.14223	-0.03827	0.025361	-0.00599	-0.00954	-0.2079	0.089071	0.011515	0.055489	-0.13126
87.8	-0.22026	0.028394	0.0651	0.092417	-0.07029	-0.09391	-0.1044	-0.10204	-0.22924	-0.04155	0.040179	0.15676	0.006796	0.078262	0.092126	0.042975	-0.19275	0.144004	-0.04086	0.026616	-0.01213	-0.00057	-0.20053	0.097642	0.007332	0.060045	-0.13103
88	-0.22559	0.03239	0.068228	0.090297	-0.07936	-0.08483	-0.10434	-0.11283	-0.2386	-0.04769	0.036653	0.153373	0.0027	0.075896	0.094845	0.040964	-0.19126	0.14523	-0.0409	0.025454	-0.01254	-0.00908	-0.19396	0.100895	0.005972	0.056364	-0.13278
88.2	-0.22244	0.035869	0.071585	0.094537	-0.07214	-0.09054	-0.10236	-0.09825	-0.22942	-0.04442	0.042404	0.154383	0.006965	0.079663	0.094408	0.036565	-0.19212	0.145851	-0.03646	0.033678	-0.01212	-0.00952	-0.2141	0.09203	0.012373	0.055116	-0.13134
88.4	-0.22553	0.03146	0.072463	0.08212	-0.07724	-0.09019	-0.10382	-0.09954	-0.21965	-0.04173	0.048941	0.154442	0.003042	0.077252	0.089685	0.041244	-0.18827	0.148924	-0.03386	0.047555	-0.01766	-0.01175	-0.20251	0.091695	0.010206	0.049107	-0.1281
88.6	-0.22956	0.028812	0.071599	0.087663	-0.07934	-0.07908	-0.10437	-0.09984	-0.22746	-0.0372	0.038411	0.153514	0.004057	0.077054	0.087399	0.039126	-0.19642	0.144621	-0.04662	0.04555	-0.01012	-0.00938	-0.19458	0.090292	0.007138	0.047228	-0.12339
88.8	-0.2258	0.024223	0.0731	0.078867	-0.07827	-0.08124	-0.1005	-0.10478	-0.23178	-0.04157	0.045511	0.155615	0.003158	0.071113	0.090539	0.041925	-0.19164	0.140321	-0.04138	0.047149	-0.00313	-0.00109	-0.19084	0.087946	0.004704	0.058008	-0.12442
89	-0.22875	0.022699	0.08068	0.082791	-0.0779	-0.08042	-0.10067	-0.103	-0.22054	-0.03695	0.048194	0.150566	0.000879	0.077933	0.090378	0.038162	-0.19012	0.136982	-0.03303	0.038654	-0.00226	-0.00161	-0.1989	0.084137	0.003561	0.056329	-0.12599
89.2	-0.23145	0.021438	0.083089	0.082509	-0.08037	-0.08463	-0.11171	-0.09993	-0.22862	-0.03924	0.043739	0.154553	0.00236	0.070262	0.086009	0.038731	-0.19572	0.127865	-0.03051	0.038419	-0.00801	-0.01038	-0.20422	0.082067	0.015187	0.05846	-0.1298
89.4	-0.22738	0.019094	0.083181	0.091694	-0.06915	-0.08658	-0.10596	-0.10208	-0.23615	-0.04376	0.041441	0.152745	0.004886	0.067258	0.084009	0.040408	-0.197	0.129017	-0.03107	0.045933	0.000991	-0.00773	-0.20567	0.082228	0.011111	0.064858	-0.12902
89.6	-0.22975	0.015482	0.084111	0.090755	-0.07315	-0.08579	-0.10441	-0.10728	-0.23333	-0.03967	0.040308	0.159207	-0.00069	0.072025	0.081964	0.034144	-0.1963	0.121206	-0.03201	0.038535	-0.00936	-0.00241	-0.2027	0.071479	0.003895	0.070207	-0.12786
89.8	-0.22865	0.016155	0.085036	0.080027	-0.07396	-0.08564	-0.10502	-0.10665	-0.2305	-0.04512	0.050719	0.15937	0.012202	0.070405	0.078445	0.043594	-0.19799	0.113642	-0.03439	0.038348	-0.00657	-0.01236	-0.19587	0.071228	-0.00345	0.06028	-0.13097
90	-0.22236	0.009558	0.081009	0.0876	-0.07513	-0.09195	-0.10948	-0.10044	-0.23371	-0.04578	0.060502	0.153074	0.013792	0.08265	0.082003	0.040076	-0.20271	0.11661	-0.0284	0.036697	-0.01251	-0.01029	-0.20131	0.067366	0.000803	0.060524	-0.13116

## Sheet: Fig5D
Time (s)	wild type
0.2	-0.00162481	-0.141765	0.071045	-0.18018	-0.221207	-0.0295368	-0.159928	0.160555	-0.104336	-0.0371966	-0.148148	-0.0982432	-0.0095748	-0.024024	-0.241691	-0.145595	0.112849	-0.28649	-0.0604663	-0.100564	-0.0304072	0.00163642	-0.0855349	-0.0974889	-0.0891327	-0.00789196	-0.0306974
0.4	-0.0248364	-0.140198	0.0820647	-0.152326	-0.197531	0.0356705	-0.122383	0.239498	-0.0829816	0.0166021	-0.0463072	-0.100332	0.0165441	0.0237919	-0.199968	-0.166079	0.113226	-0.330069	-0.0185113	-0.101435	-0.0624973	-0.0467134	-0.0497309	-0.0821112	-0.0615689	-0.0204843	-0.0217029
0.6	0.0216739	-0.128476	0.11264	-0.11217	-0.202928	0.013956	-0.167182	0.214365	-0.0483382	-0.00945874	-0.195732	-0.0686484	4.64813e-05	0.0398486	-0.22318	-0.113389	0.12373	-0.243258	0.000754378	-0.0855349	-0.0149135	-0.0509495	-0.0164803	-0.117799	-0.00557079	0.0251614	-0.0731166
0.8	0.012012	-0.134047	0.102688	-0.0610466	-0.200084	-0.0175248	-0.0736969	0.186355	-0.0376609	-0.0260551	-0.212328	-0.0775849	-0.0109675	0.057089	-0.214998	-0.128534	0.108462	-0.277437	-0.00423612	-0.0806604	-0.0587835	0.0583018	0.00537349	-0.0808925	0.0570368	0.0640583	-0.0629616
1	0.00463652	-0.162191	0.0837186	-0.0949356	-0.125517	0.00920922	-0.0706794	0.188664	-0.0781652	-0.0182211	-0.137587	-0.0812407	-0.00783393	0.0762386	-0.183952	-0.117973	0.0799409	-0.276218	-0.0452627	-0.0605824	-0.00725364	0.0104859	0.0158477	-0.0827495	-0.0223412	0.0390884	-0.0523422
1.2	-0.053793	-0.125807	0.0883319	-0.102653	-0.144957	0.0112402	-0.122732	0.14155	-0.051878	0.00585513	-0.164222	-0.0712017	0.00431736	0.0752173	-0.166021	-0.1001	0.120022	-0.281093	0.0104626	-0.051878	-0.0127084	-0.0688225	-0.0525744	-0.0801962	-0.11101	0.047578	-0.0590736
1.4	-0.0354558	-0.081879	0.117277	-0.071898	-0.115246	0.0183662	-0.0342372	0.179461	-0.063774	-0.0178149	-0.171128	-0.0356879	-0.0178149	0.110174	-0.187144	-0.0941232	0.104017	-0.193411	-0.0284343	-0.0579711	0.00270416	-0.065805	0.0126852	-0.0889586	-0.00464233	0.0309121	-0.0303492
1.6	-0.00301751	-0.0867535	0.0822388	0.00545473	-0.120062	-0.0196138	-0.115246	0.0840261	-0.0262872	0.0202173	-0.149773	-0.017989	-0.00110255	0.0695769	-0.165441	-0.0608725	0.0787513	-0.151804	0.0266121	-0.0365583	-0.0529225	-0.0692287	0.00883203	-0.0424773	-0.111822	0.0403999	-0.011954
1.8	0.0320611	-0.104859	0.0784669	-0.0532127	-0.125227	0.0296819	-0.0394018	0.148943	-0.0541411	-0.0174087	-0.1431	-0.0445663	0.0153197	0.0319798	-0.178497	-0.0506594	0.076198	-0.198808	0.0122151	-0.100332	-0.00121861	-0.009981	0.0299488	-0.073755	-0.0495568	0.019991	-0.0217029
2	-0.0126503	-0.0770626	0.0955797	-0.0420711	-0.0800801	-0.000812407	-0.0876239	0.162093	-0.0843163	0.0183836	-0.0744513	-0.0428255	-0.0212386	0.0185925	-0.131842	-0.0800221	0.0821054	-0.209949	0.0396107	-0.0636579	-0.0148554	-0.0808345	-0.0486864	-0.00760181	-0.0653408	-0.033831	-0.0101551
2.2	0.0110081	-0.0706214	0.0775327	-0.0899451	-0.0629035	-0.0104452	-0.0634838	0.0781013	-0.0667335	0.0083852	-0.109907	-0.0523422	-0.00429415	0.0483266	-0.0844904	-0.0932527	0.0681029	-0.14368	0.0121803	-0.039982	-0.0776429	-0.125517	-0.0559981	-0.0501371	-0.123254	0.0173797	-0.00388795
2.4	-0.00887845	-0.0282602	0.106524	-0.0277959	-0.0649926	-0.00208905	-0.0490926	0.138568	-0.055882	0.000615108	-0.112112	-0.0262872	0.00582032	0.0303202	-0.0716079	-0.0867535	0.0928349	-0.150005	0.0344751	-0.0301751	-0.0767725	-0.0541411	-0.00684743	-0.0547214	-0.105903	-0.00464233	-0.0429415
2.6	-0.0214708	-0.0414908	0.0994096	-0.11188	-0.0322061	0.0166195	-0.0942392	0.0722752	-0.0136368	-0.0152616	-0.0924403	-0.0431736	0.0179716	-0.000580291	-0.0591316	-0.0254748	0.07072	-0.134569	-0.00423612	-0.000812407	-0.0341791	-0.0305233	-0.0202522	-0.0171766	-0.0481641	0.0413051	0.0114143
2.8	-0.0237919	0.00475839	0.0893996	-0.117857	-0.0805444	-0.0273317	0.0500965	0.0568859	-0.0832717	-0.0342952	-0.0930206	-0.0152036	0.0332913	-0.0146233	-0.0464233	-0.0515879	0.043046	-0.159696	0.0426108	-0.0393437	-0.0208905	0.00401561	-0.0130565	-0.0570426	-0.0901772	0.0261015	-0.0198459
3	-0.012012	-0.0225153	0.125859	-0.119888	-0.0714338	-0.041897	-0.0605243	0.13974	-0.0826334	0.0243142	-0.0516459	0.0025939	0.0130682	0.00728265	-0.0582032	-0.0528065	0.0615863	-0.191322	0.0241343	-0.00174087	-0.0309295	0.0109559	-0.0156098	-0.0525744	-0.0939491	0.0237977	0.024407
3.2	-0.0113737	-0.025939	0.148003	-0.0723042	-0.0405043	-0.0394018	-0.0464813	0.135829	-2.26313e-05	0.00566364	0.117097	-0.0396919	0.034005	0.0457443	-0.0304072	-0.0193817	0.0662228	-0.138806	-0.000452627	-0.039866	-0.0366744	0.00176408	0.0145189	-0.0313357	-0.0781072	-0.0124763	0.0486748
3.4	0.0264322	-0.0157839	0.13902	-0.065747	-0.00243722	-0.0297689	-0.0695188	-0.017931	0.00145653	-0.0372547	0.138753	-0.0365583	0.0323802	0.0461912	-0.0507174	-0.0128825	0.0926608	-0.129289	0.018842	-0.0450886	-0.00893648	0.0750838	-0.00470036	-0.00435218	0.0107528	0.0140372	0.0613367
3.6	0.0334886	-0.0329025	0.128384	-0.0709115	-0.00673137	-0.00992297	-0.0436379	-0.00232116	-0.00446824	-0.00377189	0.0282312	-0.0257649	0.0153661	0.0729252	-0.0253007	-0.0546634	0.115054	-0.0807185	0.0384791	0.02432	0.0250744	-0.00522262	0.0173217	-0.00284343	-0.0324963	0.0081705	0.0200142
3.8	0.0473343	-0.00063832	0.149175	-0.105091	-0.0196719	-0.0267514	-0.0270416	0.0452395	-0.0565203	-0.00313357	-0.134569	-0.0501371	-0.0205423	-0.0302912	-0.0372547	-0.0510076	0.0739755	-0.0865214	0.0540019	0.0393785	-0.00063832	0.0228112	0.0281789	0.0069809	-0.0893648	0.0063832	0.0547272
4	0.112983	0.000609305	0.130281	-0.0266354	-0.0206003	-5.80291e-05	-0.0721302	0.0378408	-0.0517619	-0.0137529	-0.0776429	-0.0337149	0.00644703	0.00106774	-0.0536769	0.00556499	0.0615573	-0.087798	0.0381077	0.0133119	0.0270067	0.057147	-0.0210646	-0.00145073	0.00660951	-0.0608145	0.0779157
4.2	0.106988	-0.0451466	0.130032	-0.0680681	-0.00510656	-0.00568685	-0.0480481	-0.00568685	-0.0481641	-0.0471196	-0.0692867	-0.0211806	-0.017931	-0.0701572	-0.0112576	-0.0408525	0.0704531	0.00627294	0.0460693	0.00604663	0.011925	-0.0141011	-0.0301751	-0.0188595	0.00953998	-0.0493828	0.0362624
4.4	0.125865	-0.00992297	0.118072	0.00155518	0.0101261	0.0338484	-0.0383572	-0.0105613	-0.033947	0.0134047	-0.0235598	0.00839681	-0.0225733	-0.0273897	-0.029885	-0.00667335	0.054292	-0.000510656	0.0567815	-0.000545473	-0.0296529	-0.00266934	0.0356183	0.00615689	0.083028	-0.0221091	0.030384
4.6	0.12261	-0.00789196	0.115664	-0.0494408	0.0194688	0.0287882	-0.000870436	0.0240531	-0.02002	-0.0123022	0.0338077	-0.0138109	-0.00394598	-0.0280861	-0.00771787	-0.0288405	0.011925	0.00136368	0.0504099	-0.0158419	0.02273	0.0496961	0.0381425	0.00534448	-0.0360361	0.013631	0.0166137
4.8	0.146854	-0.0268675	0.141179	-0.0200781	-0.000377189	0.0481003	0.034742	0.0391464	0.00800221	-0.0077759	0.0912856	-0.031858	-0.0187434	-0.0414908	-0.0131146	0.0163468	0.000133467	0.00816469	-0.0191496	-0.0117219	-0.0130565	-0.0377189	0.000295948	-0.000516459	0.00740451	-0.00121861	0.0331694
5	0.0908039	0.0277089	0.119192	-0.0395178	0.0181979	0.040748	0.0342198	-0.00974889	0.035833	0.00799641	0.0515298	-0.0457269	-0.0470036	0.0339238	-0.0148554	-0.0291886	0.00276218	0.0830454	0.0342836	0.00248364	-0.00371386	-0.0150295	0.0354268	0.00806024	0.0479668	-0.024024	0.0320437
5.2	0.106292	0.00761922	0.0719096	-0.0302332	0.00411426	0.0457385	-0.00528065	0.044369	-0.0597119	-0.0388795	0.0124995	-0.0135788	-0.0390536	-0.0137529	0.0439454	0.0209891	0.0097779	0.0533984	0.0589982	0.0254167	0.0119714	-0.011896	0.040632	0.00125923	0.0996592	-0.025939	-0.0240821
5.4	0.123764	-0.0153777	0.091419	-0.0288985	0.0323744	0.0546866	0.00927885	-0.065863	0.0421233	-0.0242562	-0.00673137	-0.0414328	-0.0234438	0.0268791	0.0043812	0.0323918	-0.000429415	0.0337903	0.0578898	0.0351656	0.0374462	0.0412065	-0.0360361	0.0427442	0.012453	0.0391348	0.000208905
5.6	0.109895	0.00709115	0.0982665	0.0328096	0.00198459	0.0425063	0.000492087	-0.0532707	0.077759	-0.0218189	-0.014043	-0.0163642	0.00741612	0.0263394	0.0335814	0.0428023	-0.0644123	0.0620041	0.106466	0.0627643	0.0231362	0.0391638	0.00836779	0.0602516	0.128035	0.0388969	-0.00400401
5.8	0.125169	0.0328154	0.0804689	-0.0662112	0.0493479	0.0306219	0.0542514	0.00822852	-0.0124182	-0.0206003	0.000736969	0.0263104	-0.000133467	-0.00284343	0.0771671	0.040249	0.00851287	0.0963167	0.060327	0.0155634	0.0818036	-0.00899451	0.0232465	0.0907401	0.0492609	-0.0220511	-0.0244302
6	0.0687645	0.0390884	0.0752521	0.0273955	0.0609596	0.0620969	0.0671339	-0.0938911	0.0272272	0.000430576	0.0883957	0.0195326	-0.0035978	-0.0628455	0.0233915	0.0207628	-0.0253007	0.00581451	0.0267282	0.0427094	0.0532533	-0.0132887	0.00640641	0.0612323	0.0257649	-0.0285503	-0.00574488
6.2	0.0620389	0.0199098	0.0475316	0.0680797	0.0544777	0.0286896	0.0896375	-0.0984754	0.00641221	0.0346724	0.0415662	0.0493711	-0.0215868	-0.0612787	0.0641279	0.0923823	-0.0554758	0.108207	0.0580987	0.019637	0.0253703	0.0464523	0.0236875	0.0877052	0.0613484	-0.00423612	-0.00684743
6.4	0.0802948	0.0645109	0.040394	0.0404231	0.0584875	0.0216971	0.037156	-0.0446824	0.00806604	-0.000696349	0.0395758	0.0301113	0.00413747	-0.0427674	0.0731457	0.0492609	-0.0350496	0.0805734	0.0444677	0.0484079	0.029827	0.00102711	0.0544777	0.0647953	0.139247	-0.0121281	-0.0236759
6.6	0.0432085	0.0661474	-0.0035978	0.0410556	0.0678534	0.0522552	0.0125517	-0.0260551	0.0271982	0.0120584	0.0381019	0.0584759	-0.00429415	-0.009981	0.0601181	0.0566364	-0.0349915	0.128668	0.0537698	0.0533635	0.0187144	0.0218015	0.0482396	0.0902468	0.0648649	-0.0440441	-0.027912
6.8	0.0447752	0.0705053	-0.0529225	0.0314866	0.0722868	-0.00272737	0.0801556	-0.0208905	0.0439802	0.0276915	0.0635012	0.0543442	-0.00690546	-0.0794418	0.0719038	0.0535086	-0.0334248	0.129434	0.0597119	0.017931	0.0186041	-0.000394598	0.0216855	0.0667102	0.0508973	-0.0245463	0.00185693
7	0.0293221	0.0804979	-0.0544313	0.0908852	0.077759	0.000661532	0.0524351	-0.0700411	0.0380961	-0.0266934	0.0717298	0.0521798	0.018047	-0.0919181	0.0960904	0.0479668	-0.0512397	0.0702152	0.0219524	0.0292583	-0.00394598	-0.012012	0.0427616	0.0596249	0.0582844	-0.00626714	-0.0195558
7.2	-0.0213547	0.0943495	-0.0873918	0.074196	0.0780897	-0.0163062	0.0715092	-0.0273897	0.0272563	0.00018047	0.0160566	0.0562824	0.055383	-0.0432897	0.112675	0.0926028	-0.089771	0.115658	0.0172462	0.115559	0.0328096	-0.0633097	0.00840841	0.0778924	0.113035	-0.0214127	-0.00365583
7.4	-0.00702152	0.106449	-0.100274	0.126892	0.0963573	0.0264671	0.0783393	-0.0521681	0.0881462	0.0017989	0.0301635	0.07549	0.047787	-0.0352237	0.0855059	0.065039	-0.109617	0.183082	-0.0166543	0.0766332	0.00933108	0.0505317	-0.0182792	0.0420885	0.126202	-0.0225733	-0.0273317
7.6	-0.0302912	0.111288	-0.140372	0.12818	0.0868521	0.00131146	0.0769176	-0.106832	0.0299952	0.0227474	0.0182269	0.0434754	0.0160102	-0.037835	0.0799989	0.0711088	-0.0896549	0.176913	-0.0994038	0.0334364	0.0153777	0.0407828	-0.00760181	0.0644877	0.0617023	-0.0421871	0.0310978
7.8	-0.101145	0.0864111	-0.182153	0.127896	0.0936647	-0.0588415	0.0165499	-0.180703	0.0987481	0.0340399	0.0937344	0.0785076	0.0267572	-0.0216448	0.103895	0.0591374	-0.0991137	0.188937	-0.120526	0.0448449	0.0452511	0.039924	-0.0201941	0.0514892	-0.00986494	-0.065921	0.0360651
8	-0.0793258	0.0686658	-0.232	0.0448797	0.0701978	-0.0360941	0.0340399	-0.10039	0.0979125	-0.00969086	0.0666406	0.0874266	-0.00301751	-0.0117219	0.122186	0.0441775	-0.0967345	0.217928	-0.137471	0.0369761	0.0354732	0.0266644	-0.00707955	0.0478682	0.0427965	-0.055882	0.00607565
8.2	-0.122441	0.0893358	-0.204378	0.148659	0.060182	-0.0449145	0.0890224	-0.154706	0.0566944	0.0139618	0.0700759	0.0538162	-0.0145653	-0.017931	0.100054	0.0884189	-0.093833	0.180041	-0.146001	0.0257533	0.0477928	0.0429299	-0.0602342	0.0448449	-0.00893648	0.0191496	0.0374694
8.4	-0.128244	0.0985334	-0.220859	0.0939839	0.0900437	-0.013985	0.125465	-0.13631	0.0636637	0.00503692	0.103448	0.0475084	0.00355718	0.0186564	0.125436	0.0678244	-0.123834	0.233294	-0.143448	0.0142287	0.0481235	-0.000220511	0.0107064	0.057031	0.0262524	-0.0430576	0.0340341
8.6	-0.131378	0.0685904	-0.232523	0.085384	0.103768	-0.0305813	0.108892	-0.240937	0.0862254	-0.0027854	0.078583	0.0712133	0.0116174	-0.0542572	0.136589	0.0589459	-0.111996	0.182066	-0.133873	0.0216681	-0.0152036	0.0291248	0.0480307	0.0160683	-0.0643543	-0.0307554	-0.0117219
8.8	-0.153835	0.0720431	-0.240589	0.118049	0.126219	-0.0329605	0.108352	-0.18755	0.0814902	0.00970246	0.132335	0.0350148	-0.00713758	-0.0176989	0.125354	0.0937924	-0.126503	0.189215	-0.108224	0.0267572	-0.0188595	0.0699889	-0.0146233	0.00883783	-0.0213547	-0.0196719	-0.00719561
9	-0.104046	0.0619635	-0.293337	0.104824	0.0979705	-0.0257649	0.113267	-0.185345	0.105056	0.0235656	0.18025	0.048669	-0.00203102	0.0288579	0.154967	0.103866	-0.16312	0.23865	-0.102189	0.0148438	0.0005977	0.0378118	-0.00295948	-0.00696349	0.0305987	0.0317535	-0.00893648
9.2	-0.124008	0.0688109	-0.288405	0.157723	0.107841	-0.0356879	0.067395	-0.126155	0.0784843	0.018784	0.100709	0.0713526	-0.00035978	-0.00295948	0.170768	0.0791169	-0.130682	0.253912	0.00392277	0.054762	-0.0184532	0.0150121	-0.0460751	-0.00104452	0.0180587	0.0384617	0.000992297
9.4	-0.133119	0.0605359	-0.319392	0.168	0.0757454	-0.017989	0.068573	-0.170722	0.0393553	0.0308831	0.122993	0.032769	0.0105091	-0.0291306	0.192337	0.0803935	-0.111532	0.253384	0.0174668	0.0482976	-0.00853028	0.00520521	0.0333841	-0.0193817	-0.033947	0.0228867	-0.00620911
9.6	-0.168284	0.0698438	-0.315272	0.142792	0.156191	-0.0357459	0.101742	-0.214185	0.0451002	0.0596655	0.170391	0.0458314	-0.0511236	-0.055766	0.222832	0.106321	-0.150702	0.247546	0.0169677	0.0157665	-0.000870436	0.0117335	0.0279468	0.0112983	0.0374288	0.0477579	0.0134163
9.8	-0.174842	0.0483847	-0.269023	0.120393	0.169602	-0.0404463	0.029589	-0.122964	0.00692867	0.0296529	0.227248	0.0964559	-0.0150295	0.0398834	0.206276	0.121049	-0.105555	0.223563	0.0444329	-0.000928465	0.0301403	-0.02385	-0.00644123	-0.00127664	-0.0112576	0.0500269	0.0338484
10	-0.175828	0.0598338	-0.33036	0.154619	0.18191	-0.0488025	0.0702674	-0.206293	0.154584	0.030001	0.104075	0.075786	-0.00168284	-0.0412007	0.185769	0.115884	-0.0976049	0.224056	0.0304014	-0.0168284	0.0200258	-0.0561141	0.0183372	0.033123	0.0158013	0.0815251	-0.0409685
10.2	-0.101435	0.0709754	-0.318406	0.152379	0.170907	-0.0649926	0.0716079	-0.100274	0.0795521	0.0457559	0.143471	0.127281	0.000463652	0.0685904	0.190173	0.123091	-0.0451466	0.246316	0.0556905	0.0206177	-0.0225733	-0.0188595	0.00940071	0.0940535	-0.0472937	0.0296877	0.00655148
10.4	0.0351482	0.271652	-0.253007	0.352788	0.241413	0.00291306	0.175474	-0.00435218	0.0891385	0.0907575	0.267241	0.26868	0.0418564	0.355179	0.322247	0.244906	0.0694492	0.293035	0.119668	0.0762444	0.0249235	0.0446418	0.11365	0.239225	0.0616849	0.20403	0.0387866
10.6	0.178782	0.440998	-0.158129	0.367643	0.325091	0.0898116	0.194984	-0.0381831	0.147255	0.14104	0.340219	0.380137	0.133751	0.589448	0.425933	0.317878	0.106158	0.34518	0.0785192	0.150336	0.11578	0.0869798	0.218892	0.304113	0.0590388	0.214795	0.121722
10.8	0.248011	0.572915	-0.133757	0.47144	0.41843	0.163909	0.229372	0.0957364	0.194339	0.221683	0.408177	0.414432	0.198518	0.775536	0.422742	0.420223	0.159737	0.401068	0.138527	0.231037	0.124809	0.159621	0.360552	0.409331	0.159946	0.298995	0.149547
11	0.392909	0.708524	-0.097779	0.512687	0.481229	0.217888	0.245829	0.0142519	0.206096	0.274205	0.46631	0.45312	0.277321	0.926829	0.487729	0.487613	0.217603	0.434777	0.186088	0.289879	0.168424	0.19633	0.470918	0.52561	0.100501	0.343422	0.142577
11.2	0.410324	0.833135	-0.0282021	0.582415	0.502288	0.290209	0.316363	0.121037	0.229459	0.335449	0.517115	0.513917	0.357424	1.15367	0.559737	0.514921	0.312626	0.514759	0.269818	0.274245	0.223969	0.238209	0.448263	0.610379	0.1654	0.410521	0.186952
11.4	0.477939	0.929347	0.0455702	0.701618	0.55611	0.309713	0.367487	0.0849952	0.300144	0.37535	0.562261	0.594061	0.418604	1.20848	0.624016	0.559093	0.379969	0.619681	0.332721	0.376069	0.257324	0.316346	0.585891	0.775234	0.14379	0.451455	0.247854
11.6	0.480521	1.02839	0.0704589	0.725886	0.588862	0.374758	0.358045	0.157746	0.356595	0.408345	0.686049	0.598907	0.500327	1.40874	0.667462	0.646154	0.402861	0.665019	0.305471	0.377822	0.294057	0.364823	0.620116	0.833803	0.226934	0.402687	0.280112
11.8	0.600143	1.0557	0.145299	0.681859	0.616292	0.397604	0.3588	0.128633	0.329298	0.44264	0.719271	0.580448	0.536241	1.49752	0.643612	0.665483	0.404318	0.771067	0.393147	0.397627	0.291161	0.419417	0.775895	0.924711	0.254017	0.43986	0.312104
12	0.555211	1.17783	0.132463	0.849563	0.651069	0.478879	0.382905	0.123944	0.344513	0.508045	0.638842	0.735374	0.627086	1.62667	0.717437	0.71753	0.484676	0.794134	0.388986	0.467506	0.291695	0.428957	0.825208	0.95412	0.272534	0.440296	0.326135
12.2	0.627538	1.26408	0.192953	0.839466	0.710653	0.471823	0.377137	0.19539	0.329803	0.498952	0.694446	0.770412	0.706765	1.60643	0.700075	0.728039	0.512745	0.860612	0.420844	0.470645	0.323297	0.429769	0.863711	1.0336	0.297057	0.550969	0.332304
12.4	0.623598	1.34127	0.164141	0.927328	0.733784	0.533299	0.362618	0.152692	0.381518	0.535962	0.736325	0.801446	0.761127	1.75011	0.738142	0.74471	0.548062	0.87722	0.381663	0.497861	0.352533	0.423427	1.01571	1.10326	0.344171	0.558489	0.309962
12.6	0.59564	1.41089	0.209607	0.917283	0.729959	0.616455	0.30738	0.135057	0.415453	0.510093	0.858511	0.801254	0.785	1.86511	0.739906	0.791801	0.589152	0.912107	0.460281	0.464198	0.345795	0.445025	1.01365	1.15755	0.327	0.564333	0.343799
12.8	0.625971	1.40553	0.227085	0.971819	0.724041	0.604994	0.391656	0.107081	0.364428	0.543721	0.933183	0.808479	0.864924	1.82043	0.74615	0.812993	0.638157	0.957695	0.396495	0.54104	0.372077	0.547441	0.986233	1.18446	0.40126	0.558849	0.366378
13	0.649955	1.46794	0.239161	0.972469	0.736807	0.648115	0.335797	0.179496	0.41001	0.583767	0.818796	0.794848	0.881207	1.79392	0.800389	0.834777	0.64038	1.03252	0.416806	0.547829	0.391424	0.515356	1.09588	1.20405	0.38652	0.636805	0.400772
13.2	0.65332	1.46242	0.232273	0.985618	0.727302	0.678552	0.315864	0.186958	0.408153	0.647999	0.844236	0.820363	0.940652	1.87422	0.793461	0.876825	0.699958	1.09117	0.4413	0.636974	0.383973	0.439065	1.0666	1.23255	0.414949	0.665466	0.401701
13.4	0.698601	1.53259	0.242196	1.07953	0.716723	0.668611	0.343184	0.165104	0.468016	0.579798	0.852157	0.834853	0.911637	2.06895	0.817357	0.908747	0.697893	1.11273	0.437957	0.667056	0.400488	0.463136	1.01441	1.2164	0.443864	0.713404	0.435421
13.6	0.646734	1.51235	0.269162	1.08105	0.762113	0.724841	0.342627	0.170559	0.46479	0.58704	0.870715	0.848194	0.951596	2.07816	0.838073	0.955989	0.718801	1.15037	0.468701	0.651092	0.370603	0.531825	1.10437	1.20706	0.496375	0.721859	0.398863
13.8	0.673062	1.57053	0.291683	1.07764	0.757547	0.743585	0.307618	0.151351	0.430367	0.583117	0.887828	0.85308	0.946298	2.12375	0.809575	0.953203	0.743811	1.15437	0.450845	0.62867	0.433147	0.483997	1.03495	1.23106	0.401109	0.745656	0.424059
14	0.690859	1.62125	0.254585	1.08951	0.833042	0.796676	0.303945	0.209682	0.383909	0.575324	0.939758	0.896607	1.00711	2.13968	0.787339	1.00052	0.755574	1.20776	0.41409	0.700214	0.405693	0.550447	1.06941	1.25741	0.481734	0.765729	0.434957
14.2	0.688225	1.62134	0.254765	1.06508	0.793768	0.852082	0.246351	0.185919	0.468567	0.589018	0.945387	0.934616	1.02308	2.22948	0.819127	1.03693	0.780456	1.22408	0.398817	0.686536	0.407915	0.479628	1.03146	1.23572	0.460293	0.786503	0.43769
14.4	0.68035	1.64688	0.317013	1.11816	0.825168	0.813858	0.253018	0.181538	0.484978	0.630509	0.937913	0.928175	1.01225	2.17866	0.872351	1.03673	0.794848	1.22827	0.394081	0.669278	0.43816	0.55004	0.981742	1.27351	0.418564	0.81622	0.491971
14.6	0.713566	1.6714	0.362595	1.08418	0.810759	0.851641	0.263545	0.134987	0.450567	0.606613	0.914544	1.02663	1.03523	2.18289	0.861807	1.04008	0.786097	1.27981	0.430239	0.687958	0.468469	0.529469	1.02153	1.30122	0.405873	0.797024	0.47751
14.8	0.696442	1.68201	0.34117	1.15151	0.816452	0.854467	0.20305	0.11347	0.493804	0.642666	0.955815	1.02242	1.08035	2.22636	0.85297	1.07688	0.825609	1.22186	0.415007	0.744391	0.440766	0.600584	0.996708	1.28875	0.445582	0.834267	0.46895
15	0.640026	1.68468	0.392201	1.19849	0.813614	0.89475	0.248626	0.0806778	0.478119	0.638912	1.01637	1.03632	1.12228	2.25102	0.857565	1.07047	0.848426	1.22084	0.420456	0.77062	0.487856	0.606195	1.06475	1.31439	0.468573	0.790931	0.437359
15.2	0.66094	1.75355	0.397314	1.18634	0.797291	0.958902	0.160857	0.116853	0.441143	0.614691	1.01749	1.07316	1.1496	2.27791	0.842814	1.04722	0.832706	1.16912	0.463652	0.805374	0.450224	0.568981	1.00216	1.34216	0.380189	0.876988	0.480643
15.4	0.632482	1.75356	0.405467	1.16618	0.762949	0.926754	0.186714	0.03433	0.453021	0.638796	0.976595	1.0704	1.18702	2.32354	0.84213	1.10093	0.841834	1.1755	0.473395	0.790716	0.466769	0.649462	0.944841	1.37281	0.472728	0.834197	0.461267
15.6	0.649607	1.71825	0.379226	1.20263	0.774091	0.973798	0.129863	-0.047932	0.461552	0.586314	0.963323	1.08585	1.19182	2.36605	0.83306	1.10825	0.872688	1.08879	0.470802	0.823793	0.49056	0.630451	1.01224	1.40303	0.478084	0.790994	0.439071
15.8	0.666522	1.73945	0.448339	1.24793	0.782209	0.933897	0.150928	0.0687645	0.42497	0.578834	0.962877	1.07051	1.23329	2.42847	0.868034	1.10303	0.916366	1.13976	0.490885	0.861152	0.48062	0.669563	0.974262	1.3816	0.398521	0.850857	0.45135
16	0.636132	1.78231	0.43375	1.26648	0.770429	0.953586	0.247686	0.0780665	0.4391	0.590661	1.11855	1.08512	1.24754	2.35397	0.907128	1.09153	0.949675	1.13352	0.541307	0.850062	0.488379	0.674989	1.06142	1.41332	0.47386	0.820172	0.422719
16.2	0.623842	1.76679	0.422202	1.26243	0.76375	0.946176	0.0974482	0.0118437	0.466536	0.636585	1.02184	1.10016	1.25588	2.4279	0.922024	1.16871	0.957068	1.14917	0.504934	0.873175	0.486638	0.698508	0.988148	1.41928	0.490201	0.842594	0.464848
16.4	0.60005	1.79399	0.42974	1.25256	0.773243	0.962354	0.169863	0.00588415	0.390925	0.575567	0.975121	1.14923	1.30347	2.48207	0.952112	1.09147	0.976148	1.11686	0.530757	0.843105	0.491663	0.706788	0.983848	1.44393	0.484525	0.885582	0.455847
16.6	0.604234	1.77264	0.423752	1.24239	0.749451	0.977773	0.171319	-0.0230375	0.375303	0.583279	0.983726	1.14432	1.29108	2.46234	0.966022	1.15902	0.970931	1.13306	0.508561	0.868858	0.502967	0.722334	0.983831	1.44311	0.482036	0.883197	0.440528
16.8	0.623203	1.77198	0.462875	1.25963	0.771851	0.978249	0.172857	0.0494524	0.333534	0.578991	0.979223	1.14804	1.32424	2.44619	1.01807	1.16587	1.02366	1.16195	0.538986	0.853416	0.499015	0.676782	0.976305	1.45562	0.320454	0.942091	0.443319
17	0.592048	1.76591	0.467088	1.3246	0.7747	0.988694	0.155303	0.0205771	0.345633	0.568221	0.948323	1.19447	1.35663	2.48219	1.01478	1.20335	1.01177	1.20162	0.526469	0.841515	0.501934	0.755103	0.981974	1.46856	0.426966	0.957735	0.437371
17.2	0.580413	1.77722	0.447793	1.20446	0.763181	0.985084	0.102299	-0.0324963	0.267624	0.588374	0.987452	1.18075	1.35147	2.46078	1.03238	1.18137	1.02784	1.20591	0.531651	0.859405	0.540773	0.7399	0.99506	1.47265	0.474898	0.999418	0.424814
17.4	0.630927	1.76711	0.463902	1.29419	0.776441	1.01714	0.188293	0.0209079	0.322804	0.642278	0.988259	1.17999	1.35948	2.48305	1.01371	1.20752	1.05351	1.27529	0.562598	0.881839	0.50812	0.79837	1.00018	1.47877	0.518461	0.96489	0.40842
17.6	0.619095	1.80415	0.475003	1.31642	0.72675	0.989674	0.0989048	0.0460751	0.39017	0.619751	1.0129	1.19954	1.41744	2.44766	1.01785	1.2219	1.04758	1.25681	0.584074	0.864483	0.52207	0.766999	0.993145	1.45816	0.518983	0.996534	0.418947
17.8	0.58513	1.82711	0.495574	1.34668	0.733406	0.979398	0.12373	-0.0449145	0.383909	0.692705	1.02096	1.20683	1.43827	2.51453	1.02847	1.20351	1.05172	1.29816	0.527484	0.941156	0.580349	0.774561	0.957381	1.47693	0.545949	0.932667	0.370481
18	0.597386	1.82696	0.490375	1.28933	0.796345	0.979165	0.0935139	0.0257649	0.316682	0.700974	1.02333	1.19605	1.44364	2.56733	1.02412	1.19465	1.1272	1.28945	0.600978	0.915026	0.528192	0.835596	0.970658	1.49648	0.451571	0.919953	0.379748
18.2	0.648057	1.85972	0.514909	1.33008	0.807098	1.01865	0.142943	0.0268326	0.340027	0.661711	1.02971	1.2132	1.43372	2.58856	1.00432	1.22714	1.10107	1.39003	0.573548	0.931558	0.53732	0.820026	0.923411	1.48979	0.549564	0.925216	0.41843
18.4	0.61581	1.8091	0.501957	1.3378	0.809192	1.02876	0.137169	0.0166602	0.350821	0.667665	1.07877	1.21978	1.43054	2.60258	1.01475	1.1868	1.13047	1.393	0.54733	0.963103	0.513099	0.860832	0.93298	1.46277	0.561635	0.920858	0.41001
18.6	0.587806	1.82605	0.5066	1.32405	0.829828	1.01425	0.135591	0.00989976	0.314036	0.670172	1.06228	1.23904	1.45105	2.56867	1.01586	1.17973	1.15736	1.40035	0.569614	0.963625	0.606758	0.88199	0.929609	1.44426	0.444068	0.884143	0.438712
18.8	0.618544	1.80327	0.538173	1.37074	0.804509	1.05981	0.138765	0.0519999	0.362368	0.692415	1.06681	1.2148	1.48528	2.59452	1.00772	1.18813	1.13907	1.40884	0.528889	0.991247	0.594305	0.86649	0.928866	1.45423	0.45218	0.892406	0.377305
19	0.595808	1.83	0.561315	1.37032	0.807655	1.06815	0.0966126	0.125552	0.374154	0.650222	1.03036	1.20055	1.50634	2.58862	0.974395	1.2051	1.1423	1.40287	0.559865	0.952588	0.635175	0.918502	0.866659	1.44183	0.532179	0.919749	0.437835
19.2	0.590452	1.83525	0.584306	1.35985	0.822969	1.04936	0.092214	0.153029	0.353101	0.64497	1.04931	1.3131	1.52192	2.58301	1.02105	1.1952	1.15443	1.42154	0.566509	0.930653	0.603392	0.960312	0.83465	1.43612	0.518275	0.958884	0.404596
19.4	0.563561	1.85191	0.564437	1.39103	0.821489	1.07487	0.122993	0.16012	0.344542	0.633741	1.09696	1.30174	1.5151	2.55736	1.01831	1.1881	1.18071	1.39124	0.575242	0.976432	0.620888	0.881746	0.854269	1.45172	0.546686	0.99058	0.414937
19.6	0.544226	1.85907	0.564722	1.42965	0.81763	1.04047	0.10328	0.213831	0.336853	0.653222	1.09282	1.26333	1.52647	2.54557	1.01838	1.17699	1.1698	1.35507	0.565493	0.982699	0.613257	0.861146	0.833048	1.43567	0.479796	1.00244	0.433802
19.8	0.516737	1.86576	0.62206	1.40266	0.842664	1.03657	0.0852273	0.231768	0.362102	0.591508	1.04774	1.2823	1.53405	2.59637	0.997294	1.19271	1.16947	1.37046	0.545955	0.995797	0.640519	0.859121	0.741943	1.49053	0.55766	0.955379	0.402884
20	0.485541	1.87732	0.628774	1.40924	0.833333	1.00354	0.0819893	0.219687	0.379818	0.62755	1.01981	1.25826	1.53467	2.60557	0.973775	1.17178	1.17081	1.40499	0.514318	1.06339	0.611255	0.880075	0.861622	1.45341	0.529486	1.00527	0.429526
20.2	0.487566	1.90143	0.615903	1.38185	0.879425	1.01342	0.03386	0.232702	0.349643	0.633509	1.06085	1.22967	1.53146	2.57514	0.963892	1.1655	1.20668	1.3984	0.439913	1.06228	0.639324	0.827071	0.857026	1.46913	0.528053	0.989408	0.397232
20.4	0.486818	1.90884	0.605267	1.35987	0.881827	1.02265	0.0637159	0.338919	0.370365	0.631635	1.10466	1.25331	1.5509	2.60742	0.997079	1.24039	1.16463	1.33349	0.422812	1.08947	0.643084	0.889151	0.850643	1.45711	0.592268	1.0207	0.400575
20.6	0.491976	1.88402	0.615248	1.36013	0.856933	0.981283	0.0350206	0.233138	0.367405	0.628606	1.15004	1.2538	1.52326	2.67207	0.99658	1.15647	1.19498	1.36313	0.320425	1.05731	0.623824	0.859295	0.783398	1.42239	0.485199	1.02221	0.39808
20.8	0.505787	1.92099	0.659872	1.38109	0.844085	0.971964	-0.0251846	0.304119	0.393252	0.604472	1.04404	1.24018	1.54164	2.57007	1.06608	1.19249	1.16879	1.34801	0.315899	1.0451	0.667422	0.917243	0.880127	1.44829	0.515937	0.994874	0.397615
21	0.470041	1.90012	0.665855	1.39838	0.851745	0.987139	0.0130159	0.283907	0.375599	0.61299	0.995599	1.17242	1.53047	2.65461	1.02742	1.18053	1.22631	1.35179	0.326315	1.08335	0.606648	0.882878	0.825226	1.43245	0.562981	1.03422	0.404944
21.2	0.46338	1.9189	0.700173	1.46974	0.877377	0.993864	0.0314286	0.257806	0.341101	0.621474	1.04685	1.15757	1.51957	2.63836	1.01987	1.19716	1.18873	1.35129	0.398863	1.0574	0.598582	0.885895	0.803163	1.42631	0.542497	1.07818	0.428266
21.4	0.475595	1.94459	0.708454	1.43343	0.829978	0.97085	0.103222	0.281429	0.304804	0.645666	1.04789	1.17697	1.49917	2.5622	1.0625	1.16695	1.26577	1.34126	0.415535	1.05093	0.602684	0.885466	0.874034	1.39949	0.532214	1.07981	0.396873
21.6	0.403935	1.93739	0.721777	1.3644	0.807266	0.93157	-0.0602922	0.325769	0.298948	0.618213	1.05497	1.19366	1.53748	2.65697	1.01486	1.18107	1.27642	1.35167	0.421761	1.04479	0.606851	0.888669	0.845397	1.41285	0.448814	1.05792	0.382348
21.8	0.388255	1.94868	0.701572	1.41807	0.829711	0.962111	-0.0536769	0.395607	0.337497	0.632598	1.04373	1.1531	1.52905	2.58199	0.996243	1.18815	1.24261	1.33511	0.462619	1.0595	0.647349	0.850434	0.791824	1.38131	0.598326	1.03664	0.449319
22	0.403418	1.92162	0.710468	1.36634	0.889319	0.954317	0.0421697	0.301339	0.336221	0.652125	1.04893	1.14594	1.53679	2.58961	1.03112	1.17388	1.25543	1.29971	0.532539	1.02327	0.63308	0.82609	0.781629	1.36351	0.507453	1.07578	0.436135
22.2	0.386503	1.91881	0.684204	1.45672	0.87093	0.917202	0.0797552	0.350095	0.329048	0.695252	1.07188	1.15723	1.52686	2.60675	1.05262	1.20569	1.25486	1.31284	0.565435	1.02197	0.634095	0.876425	0.73737	1.32966	0.518206	1.06856	0.410997
22.4	0.383677	1.92474	0.729153	1.41243	0.864871	0.888443	0.0311442	0.349225	0.271419	0.716137	1.04386	1.20901	1.51473	2.68361	1.03542	1.1815	1.27864	1.28551	0.557538	1.01235	0.672238	0.870686	0.764324	1.32913	0.475693	1.03949	0.410515
22.6	0.413092	1.92559	0.709899	1.33847	0.833501	0.870146	-0.0237339	0.406349	0.332553	0.711239	1.09333	1.20713	1.53827	2.61396	1.00564	1.22268	1.28505	1.32457	0.543239	1.0744	0.613402	0.895261	0.745546	1.31609	0.527229	1.0533	0.422823
22.8	0.399008	1.93777	0.712533	1.4175	0.813933	0.875502	0.0238964	0.367597	0.333545	0.711321	1.10301	1.19726	1.53032	2.61112	1.01303	1.19279	1.24758	1.32901	0.571175	1.04148	0.673834	0.838068	0.724981	1.27056	0.501041	1.07477	0.423485
23	0.406296	1.90876	0.713769	1.45684	0.800418	0.860287	0.0106774	0.423351	0.298699	0.725474	1.16299	1.20658	1.51161	2.60854	1.01578	1.19925	1.27031	1.34943	0.55907	1.05841	0.618642	0.843981	0.689769	1.27608	0.491263	1.06072	0.388267
23.2	0.35797	1.85276	0.724615	1.45152	0.807277	0.847323	0.0217203	0.431046	0.346556	0.727279	1.03327	1.20021	1.58676	2.67721	1.01371	1.18613	1.28721	1.37225	0.589593	1.03821	0.646537	0.862817	0.746875	1.30845	0.485135	1.04617	0.424227
23.4	0.390518	1.86537	0.767406	1.43539	0.802003	0.811055	-0.00626714	0.420908	0.284273	0.747426	1.09169	1.20462	1.56221	2.65321	1.01537	1.18361	1.2951	1.31775	0.630724	1.0122	0.669621	0.859272	0.775158	1.3538	0.479999	1.11953	0.375007
23.6	0.393727	1.87503	0.789184	1.45427	0.785511	0.790426	0.0396745	0.491483	0.316415	0.718464	1.08448	1.24763	1.58024	2.65958	1.02614	1.22116	1.28168	1.31229	0.615961	1.01155	0.739157	0.890352	0.664897	1.32103	0.558791	1.08851	0.368984
23.8	0.39154	1.89518	0.778315	1.40374	0.81438	0.808392	0.00887845	0.512263	0.288567	0.6918	1.13399	1.27666	1.58076	2.68766	1.01518	1.281	1.30801	1.40249	0.666354	0.98458	0.692426	0.820508	0.708355	1.33314	0.54238	1.05326	0.380665
24	0.347246	1.87235	0.741362	1.40874	0.851583	0.844259	0.00214708	0.567919	0.250256	0.711907	1.08848	1.30164	1.58737	2.70098	1.02608	1.20977	1.2967	1.38732	0.598181	0.991166	0.710758	0.831772	0.733116	1.31931	0.529399	1.00155	0.353983
24.2	0.331242	1.90232	0.791111	1.36718	0.80744	0.829804	-0.0163062	0.64204	0.280025	0.704543	1.03856	1.28322	1.54701	2.69004	1.03018	1.27426	1.32173	1.392	0.619606	0.979798	0.683751	0.827739	0.693221	1.31769	0.474533	0.989274	0.321539
24.4	0.313978	1.89976	0.763727	1.47383	0.786724	0.809454	0.0203044	0.656762	0.22719	0.69625	1.0552	1.28983	1.56846	2.662	1.02089	1.23727	1.29526	1.39493	0.589088	0.953894	0.704537	0.813324	0.692461	1.33047	0.551352	0.979583	0.378646
24.6	0.362989	1.90395	0.763436	1.4643	0.811827	0.813841	0.0181631	0.672627	0.253657	0.692827	1.03595	1.27586	1.56634	2.65416	1.03469	1.23479	1.31651	1.3576	0.611499	0.996441	0.713601	0.859805	0.718278	1.34597	0.473871	0.948288	0.356612
24.8	0.315864	1.87757	0.796548	1.41241	0.803535	0.836774	0.0233567	0.678952	0.204367	0.69451	1.09077	1.26686	1.56788	2.69728	1.03202	1.24105	1.29908	1.3336	0.617325	1.03778	0.698223	0.835909	0.772837	1.32948	0.512403	0.986941	0.356995
25	0.291236	1.90208	0.764858	1.44396	0.812744	0.791198	0.0622594	0.644517	0.180465	0.732774	1.16413	1.29542	1.55788	2.62265	1.07057	1.25113	1.32967	1.37004	0.641657	1.04004	0.732136	0.9328	0.666035	1.3019	0.583546	1.00686	0.362995
25.2	0.282753	1.90461	0.773046	1.40282	0.799745	0.787907	0.0149483	0.664259	0.175068	0.697463	1.08123	1.2625	1.57124	2.69055	1.07147	1.26216	1.33084	1.31713	0.615735	1.06213	0.714959	0.865138	0.705953	1.30614	0.516204	0.986024	0.338542
25.4	0.249728	1.90339	0.768613	1.47006	0.818686	0.790182	0.026235	0.703748	0.109338	0.678569	1.03677	1.28715	1.53947	2.71312	1.04737	1.21602	1.35634	1.28797	0.596725	0.995123	0.689478	0.868521	0.767168	1.31021	0.449551	0.972608	0.342099
25.6	0.259872	1.8822	0.823885	1.4071	0.835543	0.746451	-0.011896	0.767464	0.119453	0.64797	1.03441	1.27262	1.56091	2.62864	1.05153	1.24722	1.33155	1.32092	0.576333	1.03567	0.679335	0.893967	0.714106	1.30041	0.513848	1.04772	0.409772
25.8	0.213147	1.88545	0.810214	1.44882	0.867297	0.744368	-0.0169445	0.798387	0.165267	0.691608	1.07843	1.25616	1.58653	2.69409	1.06091	1.20025	1.31765	1.30115	0.609555	1.01091	0.714477	0.872392	0.677838	1.31703	0.549077	1.03211	0.400731
26	0.221938	1.90794	0.780886	1.4378	0.880684	0.740666	-0.0142752	0.748256	0.144707	0.684395	1.07494	1.25909	1.57928	2.59942	1.05262	1.23944	1.34732	1.27254	0.566288	1.02558	0.674774	0.845461	0.708541	1.27659	0.562041	1.05135	0.436524
26.2	0.209299	1.86388	0.793205	1.44181	0.920707	0.732716	-0.0322061	0.791024	0.180058	0.683751	1.04246	1.27249	1.58049	2.60838	1.03674	1.25747	1.31201	1.30303	0.609642	1.03182	0.737875	0.848879	0.717982	1.26479	0.53031	1.07004	0.453938
26.4	0.258108	1.88585	0.762427	1.51264	0.908898	0.723704	0.0136949	0.773853	0.180291	0.700214	1.05836	1.27584	1.60476	2.54949	1.04114	1.25919	1.29549	1.34952	0.572799	1.01113	0.729803	0.847735	0.635987	1.27972	0.543959	1.04975	0.433338
26.6	0.288347	1.89911	0.755249	1.56242	0.876216	0.697324	0.0480829	0.855842	0.193306	0.744513	1.06071	1.25615	1.59296	2.64617	1.03979	1.263	1.31514	1.35914	0.574099	1.00398	0.766001	0.878595	0.741124	1.25894	0.446957	1.06178	0.452557
26.8	0.246821	1.85303	0.757761	1.57503	0.904366	0.675168	-0.0393437	0.804277	0.220899	0.771665	1.04187	1.22541	1.59241	2.61402	1.00604	1.30344	1.29805	1.3416	0.562215	0.989164	0.753339	0.782894	0.677165	1.25305	0.491802	1.09801	0.432816
27	0.240815	1.89477	0.776777	1.58188	0.904848	0.671205	0.0280513	0.797749	0.161698	0.740973	1.05797	1.18281	1.58247	2.73912	1.03775	1.27316	1.35009	1.34273	0.545833	1.00758	0.684575	0.808392	0.630567	1.23625	0.585618	1.11042	0.40148
27.2	0.257394	1.89496	0.777392	1.5342	0.920695	0.682138	0.0117973	0.87328	0.206438	0.748668	1.05865	1.19096	1.57166	2.66009	1.01681	1.26408	1.29083	1.37362	0.585165	1.00094	0.673114	0.793008	0.663568	1.22532	0.479494	1.0873	0.452041
27.4	0.249821	1.87023	0.771851	1.54049	0.905202	0.689043	0.013132	0.865713	0.21028	0.750635	1.01268	1.1496	1.61039	2.63913	1.02872	1.28309	1.33643	1.38579	0.543605	0.984574	0.718185	0.847132	0.612027	1.26163	0.531622	1.05238	0.432183
27.6	0.254655	1.85486	0.791395	1.49243	0.873895	0.666006	0.0127954	0.841619	0.273938	0.742378	1.03731	1.24496	1.63504	2.68839	1.03641	1.25461	1.37906	1.41347	0.560149	0.97873	0.660197	0.860322	0.647912	1.24045	0.574325	1.08972	0.43794
27.8	0.232343	1.82834	0.799948	1.52343	0.897176	0.653361	-0.0145073	0.813011	0.269905	0.730232	1.10155	1.20228	1.6265	2.67794	1.03715	1.31258	1.39513	1.3779	0.498487	1.01151	0.66336	0.806778	0.615398	1.28259	0.533775	1.0657	0.407956
28	0.192825	1.86263	0.831133	1.53963	0.898824	0.673671	0.0796565	0.790356	0.242028	0.723309	1.02287	1.19966	1.57618	2.63613	1.13127	1.3291	1.38185	1.41735	0.507366	0.927142	0.667868	0.805978	0.605597	1.25499	0.451304	1.1043	0.397772
28.2	0.178573	1.86505	0.795051	1.54599	0.947574	0.684447	-0.0110836	0.978457	0.184637	0.702541	1.02546	1.16943	1.6084	2.63511	1.09541	1.29315	1.38063	1.4689	0.534552	0.936804	0.683571	0.837812	0.675012	1.25192	0.526289	1.06966	0.401172
28.4	0.235795	1.8274	0.807219	1.57319	0.931059	0.662814	0.0195442	0.92893	0.246809	0.741281	1.06018	1.21733	1.57934	2.61121	1.09793	1.27695	1.39413	1.48994	0.565679	0.932487	0.737381	0.890758	0.608655	1.27243	0.502219	1.13447	0.402049
28.6	0.191136	1.84978	0.827268	1.58341	0.943495	0.693535	0.0184474	0.850724	0.23572	0.726327	1.05274	1.2372	1.60309	2.61937	1.12133	1.28803	1.3816	1.4669	0.557398	0.90501	0.743515	0.937054	0.650355	1.24746	0.53898	1.1579	0.41633
28.8	0.160549	1.84105	0.859475	1.55084	0.931587	0.658218	0.0253935	0.937326	0.220383	0.737486	1.02803	1.22812	1.58548	2.66465	1.12665	1.33278	1.38597	1.44194	0.611534	0.922552	0.763332	0.942503	0.666603	1.27087	0.564594	1.13012	0.411978
29	0.181097	1.86049	0.812866	1.5142	0.928872	0.669882	-0.0118379	0.926922	0.195047	0.742163	1.05699	1.20208	1.5982	2.6015	1.1122	1.32529	1.36583	1.48445	0.559702	0.96153	0.744809	0.891153	0.667451	1.24942	0.445513	1.1159	0.406656
29.2	0.149077	1.85113	0.807597	1.57885	0.886638	0.689769	-0.0222251	0.918925	0.182571	0.710357	1.04802	1.2203	1.57537	2.57979	1.10237	1.28451	1.38232	1.5161	0.578654	0.921519	0.761429	0.925767	0.659947	1.23858	0.465695	1.13062	0.371798
29.4	0.174023	1.82439	0.826804	1.62808	0.89005	0.653152	0.0221207	0.877794	0.192187	0.707502	0.997642	1.22313	1.57792	2.60095	1.13194	1.2649	1.38058	1.46143	0.566834	0.93497	0.740823	0.91195	0.708837	1.23998	0.549884	1.16739	0.338118
29.6	0.167437	1.86439	0.821732	1.64782	0.872943	0.679312	-0.0230375	0.89406	0.170553	0.72028	0.987121	1.18757	1.57075	2.634	1.11899	1.29341	1.38665	1.48509	0.595146	0.948816	0.730244	0.86544	0.619019	1.21744	0.484833	1.16731	0.392903
29.8	0.155924	1.85659	0.811287	1.61923	0.940321	0.641366	-0.00121861	0.931709	0.143634	0.751204	0.991305	1.21579	1.55815	2.67514	1.13172	1.2567	1.36041	1.47055	0.583982	0.942212	0.714733	0.921595	0.655584	1.18969	0.474765	1.17103	0.39606
30	0.168139	1.87494	0.831702	1.62952	0.905509	0.626714	-0.00110255	0.9384	0.143726	0.732472	1.03273	1.19388	1.53839	2.60685	1.08323	1.27418	1.36985	1.45372	0.653564	0.937036	0.689734	0.90418	0.621317	1.17229	0.603091	1.14681	0.418761
30.2	0.146552	1.87269	0.791006	1.56468	0.915003	0.634809	-0.0606984	0.879135	0.196562	0.763407	1.03652	1.21229	1.54641	2.61979	1.12517	1.26119	1.37183	1.47063	0.582119	0.933212	0.747885	0.905672	0.607071	1.15853	0.555861	1.15142	0.422904
30.4	0.144272	1.88069	0.784141	1.64625	0.882976	0.634113	-0.00348175	0.907813	0.148415	0.750415	1.056	1.20116	1.57848	2.59917	1.07425	1.25477	1.35449	1.51945	0.598936	0.900838	0.741409	0.953267	0.569265	1.14631	0.603764	1.14651	0.399078
30.6	0.0793838	1.87231	0.744026	1.65349	0.931222	0.6454	-0.0349915	0.843192	0.0835851	0.753212	1.0774	1.16419	1.57042	2.57945	1.09967	1.29166	1.35571	1.48831	0.603328	0.955304	0.767168	0.913801	0.604605	1.08712	0.555843	1.11526	0.425156
30.8	0.084206	1.8822	0.811084	1.60527	0.877365	0.620737	-0.071898	0.838039	0.0958234	0.74113	1.14865	1.16833	1.54554	2.65028	1.08206	1.30224	1.35451	1.48881	0.618967	0.943814	0.723327	0.9152	0.60056	1.07291	0.604506	1.13355	0.413399
31	0.0496903	1.88285	0.774282	1.65341	0.893271	0.612224	-0.0506594	0.852262	0.0662924	0.77929	1.11293	1.15511	1.55671	2.70508	1.08421	1.2886	1.32733	1.53957	0.546872	0.935951	0.724012	0.895331	0.601448	1.08139	0.575353	1.16177	0.397958
31.2	0.0995663	1.88592	0.782174	1.60793	0.904227	0.618509	-0.0429996	0.843697	0.0783451	0.736012	0.951938	1.13032	1.5693	2.60777	1.11292	1.28436	1.34036	1.43905	0.528854	0.902584	0.734132	0.937042	0.598054	1.08035	0.602232	1.16219	0.356664
31.4	0.0958873	1.86919	0.811769	1.59887	0.877568	0.660429	-0.0641802	0.794871	0.0814264	0.770232	0.940495	1.12117	1.53316	2.61826	1.10627	1.30469	1.32898	1.53154	0.536833	0.87787	0.733929	0.927531	0.534349	1.04875	0.661781	1.18954	0.368676
31.6	0.113987	1.85762	0.838526	1.59166	0.899097	0.602464	-0.0365583	0.752405	0.0541934	0.707166	0.984452	1.12535	1.56358	2.60156	1.09995	1.33662	1.30375	1.47595	0.550742	0.833657	0.739424	0.97674	0.569643	1.09066	0.69979	1.17926	0.338664
31.8	0.121548	1.87509	0.810991	1.5621	0.888193	0.589454	-0.0909896	0.799856	0.0581393	0.759456	0.964751	1.15644	1.53753	2.55749	1.13706	1.31375	1.33589	1.43573	0.616159	0.865684	0.743753	0.968836	0.572364	1.10583	0.679085	1.15786	0.356624
32	0.0808693	1.89579	0.807312	1.60904	0.87393	0.583535	-0.0206584	0.76693	0.0714222	0.748889	0.9878	1.10707	1.54217	2.61826	1.13443	1.34365	1.28521	1.46735	0.538841	0.814473	0.681882	0.940541	0.567414	1.11242	0.588496	1.13944	0.352347
32.2	0.0663621	1.94472	0.835335	1.59039	0.890932	0.610866	-0.0222832	0.794906	0.104806	0.72783	1.03027	1.16268	1.54277	2.62096	1.15671	1.3687	1.31911	1.43253	0.567919	0.854095	0.70828	0.976751	0.525662	1.11764	0.594456	1.2528	0.334294
32.4	0.105607	1.94396	0.838306	1.63356	0.874179	0.588194	-0.0290145	0.78955	0.191339	0.716514	0.956244	1.16392	1.55241	2.61953	1.12109	1.36216	1.31035	1.43742	0.5788	0.835509	0.669302	1.01727	0.577192	1.10193	0.64327	1.2421	0.364307
32.6	0.0522436	1.93502	0.820183	1.65025	0.846615	0.606131	-0.0449145	0.760605	0.149001	0.747455	0.955437	1.11116	1.52097	2.63413	1.13581	1.38275	1.29798	1.47136	0.575428	0.836437	0.688701	1.00086	0.568	1.1231	0.60775	1.23854	0.329599
32.8	0.0732791	1.90432	0.812407	1.6613	0.840685	0.599005	-0.0709115	0.810533	0.164106	0.769042	0.963724	1.13543	1.51819	2.6245	1.11919	1.39855	1.3104	1.50776	0.586842	0.805473	0.72646	1.06009	0.581318	1.11527	0.570838	1.19304	0.303684
33	0.0653117	1.8784	0.854548	1.64457	0.840418	0.585537	-0.0256489	0.851559	0.154131	0.734561	0.96724	1.09555	1.50771	2.63403	1.14967	1.4154	1.27662	1.51641	0.590446	0.839257	0.689124	1.00731	0.551735	1.1264	0.638065	1.24564	0.336789
33.2	0.036715	1.91772	0.836095	1.65041	0.833344	0.580865	-0.00580291	0.777468	0.169108	0.765154	0.95929	1.07349	1.50614	2.61475	1.13163	1.39869	1.30401	1.50827	0.557358	0.790739	0.743463	1.01047	0.565366	1.149	0.674153	1.28855	0.342859
33.4	0.0409105	1.87038	0.831574	1.63601	0.821756	0.559917	0.0102189	0.721383	0.170333	0.756299	0.958873	1.09275	1.54155	2.58406	1.15411	1.37226	1.33755	1.48642	0.616878	0.778425	0.747235	1.0576	0.530386	1.13276	0.64793	1.25825	0.311674
33.6	0.0444445	1.87814	0.863142	1.66773	0.822475	0.548926	-0.00539671	0.779476	0.14173	0.772245	0.941679	1.09626	1.50057	2.623	1.15113	1.42358	1.33968	1.48364	0.60182	0.828766	0.697324	1.06046	0.580349	1.13635	0.577778	1.3013	0.347519
33.8	0.0608841	1.88107	0.839414	1.60303	0.798086	0.527757	-0.00394598	0.693877	0.120068	0.773005	0.929168	1.08083	1.50422	2.60067	1.15896	1.39851	1.37686	1.52943	0.587162	0.856358	0.686217	0.991601	0.538011	1.13805	0.636602	1.3153	0.300446
34	0.0520463	1.86351	0.845513	1.66387	0.874353	0.538812	0.0114782	0.720849	0.186772	0.787275	0.947365	1.06157	1.48676	2.54105	1.11742	1.41121	1.331	1.52167	0.598471	0.825029	0.717408	0.992297	0.490827	1.12426	0.581846	1.26296	0.35884
34.2	0.0425121	1.84947	0.861105	1.69828	0.854287	0.549965	-0.00812407	0.657835	0.189622	0.767841	0.990121	1.03127	1.49688	2.47818	1.11574	1.41166	1.32351	1.51262	0.597688	0.809651	0.69372	1.00073	0.473546	1.10688	0.596173	1.26966	0.346242
34.4	0.0956261	1.83083	0.875467	1.76388	0.905741	0.596359	-0.0336569	0.606334	0.19044	0.777445	1.04803	1.05028	1.47548	2.49335	1.0826	1.37103	1.35316	1.50308	0.623116	0.802844	0.652177	0.975881	0.530067	1.12838	0.564698	1.2796	0.330116
34.6	0.100112	1.84054	0.87245	1.76224	0.928448	0.57732	-0.0311616	0.645185	0.221248	0.760889	0.970966	1.05144	1.48769	2.51428	1.08488	1.41561	1.3466	1.43848	0.606642	0.787432	0.693958	0.985549	0.499259	1.08424	0.633068	1.29072	0.353171
34.8	0.0986204	1.82969	0.84961	1.7474	0.883708	0.566439	-0.030001	0.633573	0.141214	0.796072	0.953522	1.02419	1.49677	2.47487	1.09208	1.42855	1.33656	1.36838	0.618329	0.819284	0.633945	0.981301	0.502039	1.07163	0.539299	1.29255	0.336406
35	0.0276509	1.8206	0.841898	1.7378	0.87639	0.554735	0.0132538	0.676439	0.20334	0.788818	0.9388	1.0097	1.44943	2.52218	1.0741	1.41206	1.32614	1.33915	0.620366	0.831122	0.62437	0.993626	0.521536	1.06886	0.533763	1.32527	0.302279
35.2	0.0277553	1.79949	0.856457	1.74339	0.861511	0.546762	-0.0581451	0.681024	0.197409	0.843505	0.996766	0.965389	1.4623	2.48624	1.07139	1.40859	1.3325	1.35227	0.617598	0.830536	0.60789	0.968111	0.453317	1.02401	0.540912	1.34885	0.322085
35.4	0.0351946	1.76274	0.884015	1.74189	0.865695	0.559383	-0.0620911	0.648266	0.229157	0.804666	0.994764	0.983489	1.45761	2.53681	1.12109	1.46138	1.29412	1.28298	0.630863	0.816469	0.648719	1.01518	0.486359	1.04778	0.588247	1.35066	0.293621
35.6	0.0067778	1.76222	0.878346	1.75424	0.879216	0.559354	-0.0681842	0.663493	0.219013	0.821674	0.992582	0.994659	1.42985	2.56272	1.13591	1.48373	1.31945	1.32226	0.628687	0.84087	0.669342	1.00052	0.484885	1.07905	0.622281	1.36382	0.27894
35.8	0.0443806	1.76728	0.854507	1.73898	0.870036	0.583227	0.00211226	0.598936	0.258612	0.829207	0.925552	1.01646	1.44127	2.5587	1.11913	1.48619	1.32955	1.31003	0.592668	0.835572	0.65252	1.0416	0.443476	1.04405	0.536032	1.41019	0.284517
36	0.047137	1.78434	0.87444	1.77137	0.866839	0.578689	-0.0193237	0.676341	0.158187	0.822208	0.93663	0.998292	1.4546	2.51715	1.15465	1.4514	1.28442	1.26609	0.548108	0.813353	0.674623	0.989558	0.497153	1.08058	0.688678	1.30746	0.269795
36.2	0.0882332	1.83916	0.899787	1.77485	0.869061	0.55734	-0.0704473	0.571262	0.186807	0.838398	0.930821	1.05663	1.44342	2.53302	1.15112	1.47775	1.31718	1.29207	0.521403	0.818895	0.637421	1.00567	0.511016	1.06178	0.552327	1.34418	0.242666
36.4	0.0385835	1.8069	0.876135	1.81845	0.860687	0.553708	-0.0148554	0.533914	0.18256	0.812848	0.961043	1.02873	1.4568	2.4741	1.14327	1.49618	1.31637	1.33447	0.400563	0.827518	0.6578	1.03368	0.506594	1.05496	0.585838	1.3687	0.234287
36.6	0.06866	1.78554	0.873587	1.88129	0.888895	0.545613	-0.0665013	0.565441	0.213193	0.783752	0.990998	1.06223	1.48091	2.52744	1.13908	1.4833	1.3012	1.31451	0.353107	0.819893	0.668553	1.03307	0.476076	1.05176	0.594287	1.41606	0.255885
36.8	0.0797146	1.79493	0.885506	1.82009	0.888164	0.560619	-0.0330766	0.554729	0.237467	0.807359	0.950284	1.06277	1.47657	2.53831	1.15957	1.47694	1.30099	1.32365	0.407196	0.808508	0.654742	1.02936	0.449296	1.05449	0.571076	1.40412	0.270259
37	0.0397267	1.80811	0.917933	1.84739	0.877591	0.534285	-0.0689386	0.542183	0.165661	0.809233	0.918351	1.02843	1.46348	2.52591	1.13512	1.46549	1.32007	1.33543	0.389398	0.826061	0.610901	1.07042	0.468028	1.06847	0.548978	1.43529	0.225234
37.2	0.0436495	1.82582	0.903617	1.84295	0.880557	0.549976	-0.0779911	0.57414	0.24519	0.783735	0.913656	1.07754	1.4654	2.5248	1.10888	1.44039	1.28724	1.33439	0.428939	0.779795	0.633916	1.11936	0.401329	1.08058	0.577946	1.42019	0.241883
37.4	0.0483672	1.81028	0.921189	1.89764	0.871742	0.518426	-0.0267514	0.518623	0.214214	0.786323	0.875995	1.06916	1.46581	2.51138	1.14552	1.43554	1.30148	1.34525	0.487224	0.788314	0.633155	1.07585	0.482297	1.04564	0.614992	1.42135	0.219843
37.6	0.03798	1.79709	0.915008	1.88058	0.851664	0.528587	-0.00313357	0.636788	0.22911	0.81286	0.983767	1.05283	1.46482	2.487	1.12856	1.41854	1.31568	1.37171	0.479715	0.822475	0.705703	1.04364	0.421494	1.05544	0.53598	1.43269	0.230254
37.8	-0.00417809	1.81951	0.925384	1.92874	0.901012	0.481398	-0.00481641	0.660046	0.230793	0.799049	0.932284	1.04851	1.44443	2.47617	1.13998	1.44637	1.29828	1.35674	0.481398	0.752573	0.693517	1.07591	0.464215	1.04584	0.513261	1.41955	0.234287
38	-0.0132306	1.80774	0.926138	1.8865	0.945648	0.445286	0.0238383	0.566207	0.219402	0.773957	0.924096	1.09599	1.41999	2.48547	1.16715	1.42745	1.28881	1.38743	0.516383	0.777886	0.664543	1.02594	0.408159	1.04505	0.576061	1.43379	0.219489
38.2	-0.0332507	1.80753	0.942851	1.93314	0.9122	0.475757	-0.0344112	0.573235	0.202852	0.791523	0.969898	1.04188	1.43388	2.50265	1.12227	1.42153	1.25872	1.34204	0.52366	0.732542	0.688945	0.988392	0.412372	1.04975	0.583732	1.39244	0.277071
38.4	-0.0451466	1.80835	0.917608	1.91064	0.906966	0.451437	-0.0256489	0.596493	0.205243	0.803819	0.981504	1.04133	1.41546	2.44377	1.11358	1.43877	1.29065	1.29434	0.521287	0.720466	0.735339	1.01749	0.416922	1.09232	0.545897	1.42908	0.280751
38.6	-0.0732327	1.81315	0.921345	1.92537	0.886534	0.453329	0.0456051	0.504905	0.241633	0.781524	0.994793	1.06815	1.39594	2.51033	1.13021	1.42222	1.30751	1.25809	0.526962	0.718557	0.634043	1.0391	0.456753	1.06475	0.590771	1.38035	0.235099
38.8	-0.0723042	1.81432	0.94689	1.85486	0.908399	0.423334	0.000172346	0.541278	0.231646	0.795927	0.996586	1.04142	1.36606	2.48771	1.10617	1.43737	1.31398	1.2461	0.53497	0.73513	0.628153	1.03795	0.426932	1.05017	0.570333	1.39408	0.240914
39	-0.0526904	1.81943	0.945671	1.89224	0.845217	0.419347	0.000212386	0.524513	0.207292	0.757639	1.04109	1.04854	1.36999	2.45418	1.12605	1.43972	1.30326	1.18563	0.494466	0.687523	0.714518	1.04374	0.40137	1.05532	0.578329	1.38116	0.227666
39.2	-0.0848385	1.80909	0.930171	1.87681	0.872601	0.447607	-0.0444503	0.530305	0.217516	0.768984	1.06031	1.05567	1.38827	2.39798	1.12069	1.43507	1.28679	1.23587	0.526805	0.736563	0.679526	1.04023	0.431086	1.05589	0.610008	1.36381	0.248173
39.4	-0.0900031	1.83501	0.924775	1.87309	0.86092	0.485054	-0.0620911	0.501023	0.154665	0.765241	0.937843	1.02333	1.38842	2.50845	1.16785	1.43719	1.30918	1.1375	0.576908	0.7266	0.663464	1.03958	0.41709	1.11297	0.609555	1.32942	0.244709
39.6	-0.128128	1.84503	0.950302	1.88728	0.855912	0.492841	-0.025997	0.506809	0.205574	0.743347	0.944789	1.00575	1.37235	2.56737	1.12677	1.43302	1.27415	1.13423	0.531036	0.744769	0.66011	0.995924	0.367968	1.087	0.632476	1.33528	0.224253
39.8	-0.121803	1.83708	0.908863	1.95035	0.862347	0.456265	-0.00330766	0.526956	0.253529	0.761173	0.995112	1.02886	1.43714	2.52518	1.15035	1.41162	1.29399	1.07108	0.561164	0.713775	0.669366	1.04802	0.429717	1.07975	0.642916	1.37397	0.212781
40	-0.116116	1.85479	0.943332	1.89405	0.858569	0.446325	0.0143738	0.509687	0.22625	0.770638	1.00859	1.00385	1.4251	2.60086	1.14871	1.42172	1.25889	1.14907	0.557984	0.759955	0.685492	1.10191	0.434603	1.04218	0.692165	1.36473	0.250906
40.2	-0.0728265	1.89578	1.02013	1.90894	0.879721	0.472125	-0.0365003	0.451965	0.303515	0.752742	0.960358	1.05627	1.45001	2.59904	1.14334	1.45255	1.35321	1.18907	0.605354	0.779859	0.649798	1.05355	0.475531	1.09821	0.63413	1.40054	0.262895
40.4	-0.157143	1.90144	1.02289	1.90308	0.857594	0.43823	-0.017931	0.345111	0.339418	0.725242	0.9384	1.05561	1.40729	2.60475	1.20099	1.44354	1.32149	1.152	0.517828	0.815593	0.648516	1.13107	0.434058	1.05041	0.657441	1.35756	0.240914
40.6	-0.196661	1.85399	1.01132	1.85962	0.744229	0.431406	-0.0508335	0.432317	0.285091	0.687633	0.956801	1.08267	1.37624	2.49816	1.11998	1.40237	1.30118	1.18838	0.507633	0.766698	0.632163	1.01875	0.348645	1.03698	0.58791	1.31156	0.197676
40.8	-0.243374	1.80775	0.976734	1.73912	0.709858	0.432996	-0.106135	0.367231	0.263284	0.695009	0.862208	1.05443	1.32474	2.48669	1.1237	1.39167	1.24499	1.17519	0.480202	0.729785	0.641245	1.06313	0.298931	1.00546	0.624666	1.30429	0.151363
41	-0.184126	1.80905	0.955971	1.70154	0.700458	0.435073	-0.161321	0.347687	0.249879	0.64143	0.836826	1.00052	1.33401	2.37417	1.07153	1.37976	1.18481	1.2233	0.46938	0.683443	0.621294	1.04064	0.319206	0.961281	0.55177	1.31253	0.143796
41.2	-0.248539	1.74326	0.943773	1.67426	0.689548	0.374613	-0.192134	0.277884	0.212909	0.612555	0.831418	0.990081	1.29104	2.40958	1.073	1.35375	1.202	1.16535	0.425852	0.726089	0.611331	0.994862	0.334102	0.915902	0.536554	1.294	0.13761
41.4	-0.286083	1.68949	0.903826	1.60021	0.637821	0.317442	-0.152616	0.248364	0.208469	0.597531	0.839524	0.965813	1.2712	2.30901	1.02212	1.32881	1.1862	1.19848	0.381269	0.664613	0.580604	0.978098	0.247599	0.905753	0.470744	1.27981	0.130774
41.6	-0.299024	1.65899	0.878369	1.63395	0.666893	0.321771	-0.191322	0.242109	0.1358	0.604959	0.794958	0.920666	1.22365	2.30427	1.0457	1.28177	1.1598	1.19274	0.351349	0.596168	0.597467	1.00586	0.261044	0.888495	0.457565	1.26694	0.117816
41.8	-0.33506	1.63321	0.832369	1.56096	0.609944	0.282613	-0.203682	0.242846	0.107934	0.607414	0.778222	0.907534	1.19745	2.25022	1.01609	1.27219	1.09952	1.1687	0.31739	0.559807	0.564083	0.96991	0.152216	0.889035	0.494965	1.18297	0.111236
42	-0.351076	1.56893	0.790199	1.58223	0.553412	0.279886	-0.164919	0.21935	0.118669	0.565952	0.860206	0.886093	1.16293	2.19356	1.01988	1.23188	1.08496	1.2096	0.252432	0.533154	0.561344	0.952414	0.254574	0.85789	0.554381	1.17982	0.103019
42.2	-0.384849	1.54663	0.735223	1.47114	0.526347	0.224219	-0.0871017	0.160253	0.101551	0.543228	0.754204	0.876732	1.15364	2.14503	0.990191	1.21359	1.08523	1.21088	0.190295	0.563648	0.56576	0.910726	0.204796	0.855476	0.451472	1.20468	0.0759775
42.4	-0.410788	1.50045	0.704943	1.46969	0.485239	0.212357	-0.147858	0.206502	0.0710102	0.489731	0.70897	0.817821	1.11358	2.18343	0.958153	1.21974	0.995739	1.23261	0.10458	0.542183	0.567287	0.880742	0.17407	0.838573	0.464366	1.14855	0.0632111
42.6	-0.400285	1.45572	0.695322	1.39179	0.458041	0.20034	-0.214359	0.18177	0.0291944	0.47946	0.751784	0.782795	1.10473	2.09494	0.971587	1.20977	0.995251	1.22328	0.120817	0.485849	0.590104	0.890224	0.130339	0.837865	0.491396	1.13964	0.0555338
42.8	-0.480191	1.42663	0.654586	1.35825	0.402217	0.177041	-0.199968	0.165209	0.0460113	0.483104	0.712748	0.788691	1.06393	2.15998	0.943541	1.19464	0.996063	1.25898	0.116401	0.523881	0.530949	0.880638	0.0814322	0.864906	0.387594	1.12077	0.0528413
43	-0.50346	1.41969	0.62473	1.29292	0.387559	0.156029	-0.240995	0.0973438	0.000748575	0.464447	0.846488	0.794685	1.05778	2.04712	0.925135	1.15662	0.978225	1.24564	0.0262988	0.491216	0.563869	0.85308	0.152471	0.87245	0.452261	1.08796	0.0150121
43.2	-0.530154	1.39715	0.582432	1.29416	0.33488	0.134604	-0.19962	0.14473	-0.0351656	0.459939	0.6883	0.753131	1.0451	2.02475	1.00166	1.14369	0.955443	1.24671	0.0297109	0.470831	0.538957	0.83212	0.0641279	0.860461	0.380305	1.07624	-0.0197299
43.4	-0.560329	1.37629	0.558779	1.27454	0.301728	0.131918	-0.230666	0.130072	-0.0412007	0.432061	0.657649	0.740701	1.01149	2.04957	0.976287	1.1381	0.956209	1.20882	-0.0215288	0.462486	0.51824	0.819342	0.0503054	0.847405	0.398567	1.09561	-0.0236759
43.6	-0.561025	1.37288	0.566904	1.21682	0.25498	0.0695246	-0.210065	0.119163	-0.0529806	0.392474	0.666058	0.726994	0.98639	2.01337	0.994079	1.14983	0.930177	1.24495	0.0283704	0.426467	0.504511	0.792016	0.0497774	0.853289	0.382023	1.05289	-0.0464233
43.8	-0.576519	1.34618	0.569701	1.22203	0.255374	0.108584	-0.242736	0.0773992	0.00260551	0.401004	0.599597	0.660441	0.965244	2.05655	0.964554	1.10081	0.887833	1.26535	0.0205423	0.413364	0.515443	0.793815	-0.0375448	0.825214	0.471469	1.12177	-0.0595959
44	-0.600543	1.304	0.535881	1.1902	0.234142	0.0562418	-0.218538	0.0512281	-0.00127664	0.430257	0.630776	0.683687	0.983146	2.00349	0.949153	1.08831	0.91784	1.20608	0.0294556	0.363274	0.526875	0.758463	-0.011896	0.813353	0.494338	1.08027	-0.0483963
44.2	-0.611046	1.31082	0.511155	1.14416	0.221828	0.0468875	-0.238383	0.0016016	0.018372	0.381013	0.637409	0.661764	0.950261	1.90749	0.951213	1.04998	0.892435	1.22275	0.063391	0.405768	0.574482	0.803749	0.0531721	0.798486	0.456051	1.04066	-0.0701572
44.4	-0.640177	1.32997	0.483144	1.17887	0.192424	0.0712249	-0.242329	0.017194	-0.0724783	0.381802	0.62112	0.688747	0.938452	1.91806	0.898981	1.03657	0.85048	1.14291	0.0821518	0.41333	0.492818	0.82847	-0.0107934	0.819023	0.407457	1.03721	-0.113447
44.6	-0.650738	1.32876	0.516209	1.11432	0.173838	0.0854478	-0.256431	-0.0391696	-0.00104452	0.388383	0.613443	0.645829	0.927688	1.89232	0.904087	1.03047	0.847788	1.21963	0.0878851	0.414867	0.463641	0.746324	-0.0158419	0.741815	0.482123	1.01137	-0.104626
44.8	-0.681842	1.29892	0.494013	1.11055	0.1375	0.0284226	-0.273201	0.0122441	-0.0351076	0.387402	0.595373	0.593237	0.920219	1.89831	0.935649	1.02973	0.796681	1.22758	0.110331	0.375222	0.490253	0.781518	-0.0302332	0.737985	0.346074	0.950186	-0.119482
45	-0.716253	1.31005	0.496874	1.10708	0.0989222	0.0543733	-0.239776	-0.0633678	-0.0371386	0.378994	0.584881	0.672737	0.900281	1.81224	0.921293	0.971784	0.784861	1.24461	0.114004	0.32964	0.51538	0.740881	-0.0416069	0.72747	0.394714	0.92568	-0.0846644
45.2	-0.738304	1.25783	0.459689	1.05742	0.135498	0.0499456	-0.251962	-0.000986494	-0.0494988	0.357465	0.629836	0.680205	0.881613	1.84968	0.89746	0.944748	0.752939	1.2312	0.128227	0.308517	0.474115	0.718986	-0.073755	0.710671	0.392306	0.860397	-0.120817
45.4	-0.671106	1.26808	0.457565	1.05587	0.0604431	0.0039866	-0.260086	-0.0246624	-0.0553017	0.322398	0.668617	0.670967	0.862759	1.8334	0.903757	0.969086	0.742244	1.16583	0.0966416	0.316572	0.480138	0.665994	-0.0291886	0.717773	0.35649	0.898882	-0.140488
45.6	-0.730586	1.27257	0.457815	1.05748	0.0449029	-0.00266934	-0.287128	-0.0846644	-0.0687064	0.330992	0.504157	0.636858	0.849708	1.77653	0.936531	0.935603	0.731515	1.15696	0.115623	0.325561	0.440661	0.696297	-0.0213547	0.679503	0.379737	0.833855	-0.165035
45.8	-0.753334	1.24773	0.441247	1.10583	0.0609596	-0.0185693	-0.300242	-0.15633	-0.108863	0.33683	0.513389	0.608841	0.84947	1.82904	0.860687	0.922854	0.724841	1.21526	0.0994967	0.351331	0.437232	0.685707	-0.0485703	0.624242	0.428005	0.842373	-0.152675
46	-0.744745	1.23556	0.412732	1.06398	0.0169503	-0.0603503	-0.250918	-0.160915	-0.0802542	0.342052	0.51849	0.632575	0.805072	1.75393	0.862997	0.888443	0.649845	1.17321	0.0652247	0.363512	0.444659	0.663992	-0.0790356	0.6673	0.352718	0.832213	-0.152326
46.2	-0.759891	1.19006	0.43375	0.990464	0.0145363	-0.0434058	-0.302274	-0.214766	-0.119772	0.34413	0.50335	0.628931	0.811009	1.75629	0.895006	0.924125	0.646775	1.16195	0.0755249	0.334044	0.440383	0.649345	-0.0671977	0.645034	0.359792	0.764748	-0.181805
46.4	-0.780317	1.19669	0.444282	1.01771	-0.00127664	-0.0246043	-0.242097	-0.191032	-0.125111	0.324737	0.52572	0.609892	0.805571	1.75409	0.855767	0.893514	0.650576	1.19848	0.0765055	0.346213	0.457258	0.705541	-0.124356	0.648707	0.274135	0.811067	-0.192947
46.6	-0.795753	1.18076	0.374717	1.03467	-0.0387054	-0.0724783	-0.246043	-0.147974	-0.10068	0.295502	0.55145	0.568	0.754163	1.70563	0.861378	0.909438	0.663452	1.18404	0.0516459	0.301479	0.420931	0.643722	-0.10451	0.649177	0.332118	0.823868	-0.199562
46.8	-0.825116	1.16099	0.396548	1.0042	-0.0487444	-0.05977	-0.297515	-0.17252	-0.113679	0.282706	0.534599	0.58408	0.737428	1.6642	0.864564	0.908474	0.648545	1.16315	0.0814322	0.267514	0.471707	0.654324	-0.0775849	0.634647	0.327	0.836013	-0.240705
47	-0.812175	1.11386	0.371363	1.01681	-0.0811827	-0.0705053	-0.2638	-0.25144	-0.149251	0.269232	0.484949	0.57212	0.708814	1.63004	0.919041	0.898337	0.625693	1.15737	-0.0035978	0.353594	0.462463	0.595257	-0.133003	0.646577	0.318348	0.806169	-0.216274
47.2	-0.808577	1.11288	0.391946	0.974128	-0.0305813	-0.0514138	-0.288405	-0.185925	-0.0933688	0.293732	0.513418	0.598553	0.721203	1.60098	0.909583	0.852	0.613072	1.26066	-0.0085883	0.311013	0.444317	0.595814	-0.114375	0.640641	0.25885	0.784959	-0.204727
47.4	-0.831093	1.1205	0.337155	1.00386	-0.00940071	-0.0624393	-0.218363	-0.200955	-0.159406	0.288857	0.5878	0.584452	0.706963	1.58817	0.850828	0.862214	0.585508	1.22115	-0.0194978	0.299662	0.397621	0.623232	-0.165267	0.673549	0.345349	0.810852	-0.23113
47.6	-0.809796	1.11483	0.349765	1.03292	0.0107528	-0.0766564	-0.222484	-0.247726	-0.172985	0.291051	0.513975	0.587144	0.663104	1.55003	0.859968	0.851937	0.54798	1.17247	-0.0696929	0.280547	0.410469	0.575115	-0.215462	0.637067	0.312945	0.787704	-0.23525
47.8	-0.85059	1.1044	0.35356	0.994502	0.0499979	-0.103582	-0.276567	-0.308541	-0.173681	0.270868	0.439338	0.633927	0.670799	1.55239	0.830971	0.836188	0.526068	1.17758	-0.0535608	0.322346	0.407794	0.606671	-0.233625	0.647402	0.387362	0.777665	-0.241459
48	-0.828481	1.113	0.360059	0.990481	0.0703255	-0.0987655	-0.308715	-0.408351	-0.193991	0.259349	0.457437	0.582496	0.667474	1.5399	0.86284	0.808566	0.52662	1.14136	-0.0526904	0.287859	0.408542	0.613402	-0.229157	0.641268	0.289536	0.812465	-0.225559
48.2	-0.883667	1.08709	0.344031	0.944377	0.0445605	-0.113273	-0.251034	-0.329837	-0.206119	0.242347	0.468701	0.577517	0.683072	1.58247	0.820108	0.799269	0.506698	1.15444	-0.0475258	0.29643	0.424222	0.66636	-0.229969	0.597398	0.276625	0.790136	-0.269023
48.4	-0.860687	1.02523	0.335135	0.933485	0.0739233	-0.133467	-0.245695	-0.437191	-0.21198	0.256262	0.515351	0.535138	0.64204	1.52958	0.802687	0.786451	0.483347	1.10838	-0.0735229	0.274437	0.411171	0.609636	-0.147104	0.64385	0.282265	0.797471	-0.297573
48.6	-0.868986	1.03278	0.334329	0.883882	0.137593	-0.141243	-0.27941	-0.431736	-0.201071	0.280948	0.540883	0.527542	0.643241	1.51539	0.807016	0.75009	0.462155	1.12188	-0.0293047	0.257359	0.388122	0.602179	-0.26763	0.606143	0.273242	0.790548	-0.299082
48.8	-0.876297	1.00223	0.391035	0.910639	0.131674	-0.156679	-0.269545	-0.432085	-0.142635	0.255177	0.408206	0.52149	0.629836	1.50785	0.765409	0.713746	0.439274	1.13098	0.0190161	0.254881	0.363744	0.510424	-0.17194	0.606688	0.306771	0.795764	-0.289565
49	-0.895447	1.06659	0.375733	0.877876	0.137628	-0.161437	-0.293801	-0.437597	-0.178207	0.221004	0.388754	0.532144	0.590806	1.43487	0.782012	0.748366	0.419869	1.12816	0.00283762	0.228542	0.403436	0.537286	-0.202405	0.577314	0.318719	0.770081	-0.30326
49.2	-0.919819	1.00332	0.347008	0.881572	0.164472	-0.137993	-0.260841	-0.500501	-0.0901192	0.224346	0.410805	0.556029	0.564426	1.48142	0.737956	0.710676	0.414815	1.08991	0.0470964	0.286797	0.418343	0.596197	-0.193063	0.546454	0.217261	0.775814	-0.288753
49.4	-0.938562	1.02309	0.331393	0.928883	0.141614	-0.107992	-0.249351	-0.492029	-0.161843	0.226418	0.403952	0.520451	0.562534	1.44593	0.733633	0.681813	0.409505	1.13057	0.0138748	0.278104	0.355074	0.517677	-0.294033	0.520405	0.240182	0.757732	-0.319856
49.6	-0.905196	0.997311	0.321858	0.899764	0.198204	-0.100506	-0.273897	-0.446708	-0.166543	0.216234	0.389897	0.528477	0.528564	1.40046	0.691776	0.724133	0.398259	1.13923	0.0473459	0.268826	0.394546	0.507592	-0.215288	0.517997	0.277716	0.80007	-0.257881
49.8	-0.894983	0.990626	0.343474	0.915136	0.230132	-0.0680681	-0.249525	-0.495452	-0.165093	0.247465	0.352045	0.54086	0.523521	1.35263	0.685364	0.697591	0.392103	1.12301	0.0797726	0.248701	0.371108	0.474307	-0.295542	0.491762	0.298908	0.802304	-0.297515
50	-0.946861	0.966364	0.323965	0.91397	0.198848	-0.0767725	-0.246159	-0.539961	-0.216623	0.211754	0.377415	0.514161	0.518954	1.39294	0.70297	0.705198	0.361301	1.09526	0.0679811	0.219594	0.369471	0.454611	-0.293975	0.519755	0.257806	0.755498	-0.322874
50.2	-0.891559	0.955176	0.312173	0.860125	0.197061	-0.0965604	-0.260841	-0.614818	-0.195442	0.211388	0.359717	0.473657	0.48962	1.31439	0.692589	0.679915	0.311622	1.13507	0.0462724	0.288724	0.351546	0.487125	-0.280803	0.5195	0.295072	0.723425	-0.325369
50.4	-0.966126	0.986407	0.304618	0.898882	0.227155	-0.105091	-0.240531	-0.615689	-0.172288	0.258357	0.361051	0.48846	0.477069	1.37879	0.724998	0.681087	0.29878	1.10653	0.0851345	0.257121	0.328363	0.457107	-0.358678	0.483643	0.333012	0.724255	-0.3545
50.6	-0.897652	0.970757	0.298066	0.893897	0.184295	-0.142635	-0.267398	-0.583366	-0.27175	0.219913	0.331572	0.488013	0.474852	1.30993	0.737486	0.714158	0.305169	1.11064	0.0792387	0.253384	0.312272	0.452406	-0.336685	0.532521	0.260127	0.72899	-0.336046
50.8	-0.937402	0.928489	0.301664	0.848472	0.164309	-0.134395	-0.257475	-0.596713	-0.290087	0.207367	0.420061	0.458163	0.463931	1.2506	0.722114	0.649212	0.271669	1.08305	0.0338135	0.27088	0.344066	0.402995	-0.365815	0.512896	0.276892	0.705674	-0.317013
51	-0.88947	0.923649	0.327232	0.837772	0.170907	-0.129637	-0.258462	-0.608609	-0.316607	0.243618	0.361359	0.495563	0.428342	1.27699	0.68432	0.644906	0.285892	1.0444	0.062625	0.326605	0.351801	0.419846	-0.433071	0.458958	0.283118	0.682416	-0.337671
51.2	-0.911869	0.927311	0.293424	0.878543	0.144637	-0.159348	-0.27146	-0.578144	-0.319508	0.246687	0.381512	0.498644	0.418459	1.26599	0.712603	0.628368	0.257603	1.05844	0.0373359	0.253094	0.323651	0.471695	-0.347652	0.464343	0.280257	0.683101	-0.353571
51.4	-0.906298	0.931744	0.323303	0.804724	0.143924	-0.145885	-0.204901	-0.585513	-0.402316	0.189639	0.375634	0.491042	0.414345	1.24308	0.700661	0.603212	0.242898	0.99199	0.0189001	0.244198	0.389189	0.490601	-0.37806	0.458291	0.200224	0.688689	-0.354152
51.6	-0.892952	0.914405	0.295983	0.771839	0.138637	-0.183372	-0.185461	-0.559749	-0.399124	0.233875	0.371798	0.477591	0.381628	1.26061	0.716009	0.580889	0.213878	0.978144	0.0414676	0.2539	0.379069	0.497808	-0.423786	0.503408	0.221514	0.754953	-0.367846
51.8	-0.918136	0.859794	0.297416	0.769054	0.145438	-0.17223	-0.171882	-0.613658	-0.485994	0.196829	0.373202	0.476982	0.38807	1.25509	0.690529	0.59864	0.214394	0.957544	0.0252949	0.252618	0.399408	0.453805	-0.444097	0.515438	0.208185	0.77907	-0.385603
52	-0.892487	0.870274	0.33419	0.788563	0.118838	-0.170838	-0.191786	-0.611685	-0.483788	0.21227	0.344165	0.465515	0.408815	1.27472	0.712493	0.565702	0.193643	0.970978	0.00331346	0.236486	0.330505	0.474318	-0.477812	0.529161	0.261932	0.73076	-0.381425
52.2	-0.908736	0.850973	0.279874	0.795881	0.129933	-0.168749	-0.211864	-0.647837	-0.471428	0.230474	0.321272	0.440557	0.43563	1.26819	0.700127	0.517683	0.180534	0.954956	-0.0384733	0.226429	0.374932	0.484537	-0.461795	0.546767	0.256239	0.694144	-0.391232
52.4	-0.921502	0.853416	0.287911	0.769019	0.100158	-0.192018	-0.210123	-0.629209	-0.498644	0.195483	0.326373	0.451356	0.43462	1.26475	0.693198	0.542241	0.166532	0.906269	-0.0822272	0.212677	0.392921	0.521095	-0.477463	0.515739	0.265315	0.725224	-0.419434
52.6	-0.876703	0.815518	0.311872	0.763518	0.0760065	-0.207802	-0.175074	-0.712133	-0.558356	0.221683	0.358898	0.442594	0.397348	1.16683	0.670514	0.510691	0.140692	0.961432	-0.0985914	0.244941	0.358655	0.527461	-0.466148	0.511138	0.292142	0.697307	-0.436727
52.8	-0.893822	0.795939	0.243049	0.696291	0.0695363	-0.170431	-0.216971	-0.67424	-0.533113	0.18524	0.351227	0.439112	0.387083	1.1878	0.683554	0.466977	0.163607	0.957434	-0.13927	0.213245	0.368914	0.509536	-0.501603	0.490978	0.380224	0.677339	-0.448275
53	-0.922604	0.868341	0.258717	0.715789	0.0889238	-0.186796	-0.228112	-0.627062	-0.520985	0.18256	0.270073	0.466235	0.360854	1.13675	0.635355	0.469833	0.152019	0.924618	-0.193933	0.198372	0.375489	0.482216	-0.529806	0.506339	0.281168	0.714257	-0.420305
53.2	-0.957712	0.824512	0.258554	0.726135	0.055029	-0.221961	-0.236411	-0.704473	-0.545357	0.15853	0.300144	0.431783	0.330284	1.14746	0.661804	0.504546	0.15297	0.968888	-0.187028	0.201361	0.400302	0.541191	-0.545357	0.476338	0.29726	0.734869	-0.392683
53.4	-0.924055	0.794563	0.304577	0.662907	0.0698902	-0.236062	-0.218073	-0.631414	-0.546286	0.125337	0.29397	0.437417	0.348192	1.17021	0.65762	0.504284	0.142763	0.941505	-0.201535	0.226325	0.3592	0.584434	-0.497715	0.499834	0.235453	0.644169	-0.366802
53.6	-0.947151	0.793554	0.268094	0.705262	0.0450306	-0.247668	-0.209195	-0.650042	-0.540831	0.117109	0.344942	0.459486	0.334509	1.10017	0.645138	0.454977	0.112019	0.94823	-0.140372	0.176617	0.35544	0.498905	-0.561722	0.490502	0.244204	0.669128	-0.433129
53.8	-0.942915	0.768764	0.268123	0.679689	0.0851809	-0.268326	-0.214417	-0.747066	-0.542688	0.115211	0.413376	0.423554	0.325108	1.15708	0.613495	0.458714	0.11629	0.938986	-0.155692	0.159476	0.37597	0.500907	-0.587486	0.444375	0.288155	0.647599	-0.451698
54	-0.978312	0.769506	0.313073	0.751622	0.0699831	-0.250976	-0.226778	-0.668379	-0.485761	0.0938562	0.282573	0.458192	0.304142	1.127	0.641935	0.452952	0.0812755	0.932899	-0.134918	0.238877	0.350264	0.508468	-0.595901	0.457467	0.304734	0.624973	-0.40661
54.2	-0.982549	0.756403	0.297231	0.665553	0.0780897	-0.213199	-0.226894	-0.676213	-0.55499	0.124165	0.225234	0.4327	0.325276	1.01719	0.638813	0.478833	0.0802078	0.947824	-0.135846	0.213129	0.358132	0.452981	-0.582902	0.448716	0.312226	0.66864	-0.463478
54.4	-0.952431	0.707154	0.299105	0.687041	0.0872641	-0.220975	-0.248655	-0.642266	-0.556905	0.117782	0.216588	0.40484	0.317715	1.10132	0.594763	0.455621	0.0510946	0.961194	-0.118611	0.16699	0.309951	0.44318	-0.648243	0.44582	0.331897	0.678789	-0.432433
54.6	-0.92214	0.720913	0.246943	0.728758	0.0773702	-0.255328	-0.234612	-0.702732	-0.512223	0.0933862	0.241761	0.414293	0.277327	1.07952	0.61082	0.469333	-0.0141011	0.961403	-0.126155	0.174691	0.318939	0.456126	-0.62683	0.426264	0.222867	0.623482	-0.421929
54.8	-0.971175	0.73947	0.249061	0.681627	0.047961	-0.223122	-0.213199	-0.682828	-0.52174	0.100942	0.23738	0.417363	0.282509	0.986605	0.569567	0.416365	0.00663272	0.963724	-0.0714918	0.134923	0.352788	0.461175	-0.610582	0.439611	0.305709	0.633596	-0.43899
55	-0.933978	0.736418	0.269406	0.727969	0.0658514	-0.261479	-0.237223	-0.7773	-0.528413	0.0694318	0.246525	0.413475	0.283495	0.97956	0.561826	0.44	-0.0157839	0.894054	-0.069751	0.148322	0.319792	0.46725	-0.631879	0.422574	0.353896	0.62166	-0.462898
55.2	-0.943727	0.703342	0.277077	0.693332	0.0713468	-0.275	-0.220743	-0.748285	-0.541179	0.102903	0.239939	0.403755	0.248718	0.944545	0.553093	0.397917	-0.0280861	0.889244	-0.0644703	0.183616	0.317152	0.436988	-0.599266	0.415088	0.330505	0.63326	-0.468585
55.4	-0.928814	0.696796	0.230869	0.667758	0.0308541	-0.271808	-0.229273	-0.789776	-0.532823	0.124385	0.238354	0.376365	0.238772	1.00521	0.552222	0.423166	-0.039866	0.737387	-0.0828655	0.204622	0.32935	0.458111	-0.622072	0.393414	0.288706	0.595831	-0.483905
55.6	-0.966881	0.67406	0.262466	0.685875	-0.0067894	-0.277553	-0.206119	-0.733604	-0.526034	0.111213	0.276427	0.455662	0.232	0.981156	0.544121	0.432195	-0.0673718	0.760135	-0.0875079	0.18856	0.287412	0.380125	-0.61801	0.416747	0.30492	0.586396	-0.485587
55.8	-0.929336	0.676787	0.214864	0.703167	-0.00736969	-0.286141	-0.249583	-0.793548	-0.554816	0.116557	0.254046	0.406679	0.236828	0.995303	0.520266	0.380764	-0.0665013	0.75251	-0.0862893	0.229325	0.299639	0.382354	-0.651028	0.448437	0.253193	0.604797	-0.528819
56	-0.944481	0.686113	0.261659	0.650431	-0.0141591	-0.300823	-0.268443	-0.724435	-0.572515	0.142868	0.322978	0.414003	0.250314	1.03829	0.52308	0.391296	-0.0971987	0.746974	-0.0929046	0.210512	0.294411	0.36852	-0.680275	0.466467	0.375019	0.597322	-0.542514
56.2	-0.966765	0.640142	0.229273	0.650889	-0.021877	-0.296413	-0.254167	-0.76668	-0.546924	0.113383	0.270282	0.419539	0.29979	0.994537	0.485622	0.347913	-0.0813568	0.732838	-0.0688805	0.190138	0.305889	0.380793	-0.626366	0.471428	0.309713	0.578005	-0.525918
56.4	-0.971117	0.662263	0.208754	0.715296	-0.0174087	-0.298328	-0.281557	-0.757164	-0.551625	0.140692	0.253866	0.398387	0.246351	0.936769	0.50895	0.376736	-0.161553	0.75031	-0.112692	0.17519	0.317744	0.421094	-0.661532	0.457142	0.324058	0.575463	-0.521275
56.6	-0.971639	0.621561	0.238749	0.616217	-0.0467714	-0.32003	-0.234786	-0.754958	-0.532011	0.168406	0.244761	0.413788	0.27717	0.976664	0.497037	0.367817	-0.141243	0.740492	-0.065863	0.189482	0.333249	0.439344	-0.632865	0.459086	0.302343	0.631391	-0.526382
56.8	-0.992762	0.66383	0.257423	0.686438	-0.0921502	-0.333203	-0.275116	-0.776081	-0.521449	0.174145	0.262303	0.430535	0.270671	0.901975	0.523498	0.351801	-0.164745	0.743097	-0.0703313	0.227491	0.320854	0.429467	-0.657295	0.449923	0.20287	0.638198	-0.565145
57	-0.999087	0.656692	0.261253	0.7231	-0.0840841	-0.336685	-0.269429	-0.772135	-0.530444	0.183244	0.341066	0.43393	0.25628	0.918194	0.509072	0.36827	-0.144492	0.795352	-0.0860571	0.193486	0.315231	0.37329	-0.647489	0.456219	0.200728	0.59944	-0.527891
57.2	-0.97396	0.657911	0.269731	0.72534	-0.0913958	-0.332739	-0.215462	-0.78287	-0.571819	0.185357	0.240258	0.448246	0.244993	0.938203	0.48976	0.342389	-0.162249	0.746689	-0.0921502	0.229749	0.286287	0.41727	-0.739058	0.425057	0.140204	0.596435	-0.51466
57.4	-1.01209	0.664108	0.264874	0.747705	-0.0726524	-0.342604	-0.19904	-0.777242	-0.562012	0.177047	0.204495	0.414879	0.236683	0.9629	0.507261	0.365334	-0.193121	0.81015	-0.0987075	0.141423	0.242962	0.400093	-0.75757	0.463925	0.251428	0.589227	-0.516459
57.6	-1.02555	0.649183	0.255456	0.668425	-0.0524583	-0.361927	-0.190335	-0.822214	-0.508509	0.180494	0.19319	0.409476	0.238343	0.937408	0.509246	0.318713	-0.212038	0.779406	-0.0590156	0.175613	0.26297	0.336464	-0.70575	0.470378	0.212363	0.58007	-0.502532
57.8	-1.01551	0.647785	0.24837	0.70116	-0.0853028	-0.366744	-0.22434	-0.832833	-0.5182	0.229847	0.20363	0.397859	0.228698	0.868707	0.49056	0.320553	-0.228809	0.763065	-0.0921502	0.159824	0.292391	0.3502	-0.711146	0.450724	0.208353	0.552037	-0.498818
58	-1.01975	0.641935	0.232029	0.691109	-0.131204	-0.38717	-0.270183	-0.843221	-0.472067	0.186981	0.212955	0.422463	0.262779	0.879733	0.500193	0.316856	-0.26235	0.801167	-0.0920922	0.149454	0.224845	0.310096	-0.736795	0.443238	0.195767	0.571273	-0.509728
58.2	-0.98957	0.630451	0.245875	0.778762	-0.112344	-0.376028	-0.27883	-0.819603	-0.536479	0.20009	0.197972	0.492	0.298223	0.910894	0.509211	0.348708	-0.256489	0.768885	-0.0734068	0.169555	0.28877	0.248428	-0.758092	0.454466	0.220661	0.516064	-0.518606
58.4	-1.0281	0.62914	0.220418	0.730662	-0.15604	-0.387924	-0.276335	-0.816005	-0.495278	0.24685	0.218265	0.440075	0.306771	0.872978	0.460234	0.316444	-0.257069	0.759485	-0.174784	0.201825	0.279172	0.300126	-0.766506	0.432497	0.161715	0.487914	-0.540251
58.6	-1.0147	0.623174	0.226981	0.799194	-0.143216	-0.373069	-0.261247	-0.855639	-0.492841	0.198117	0.212514	0.463206	0.349086	0.884607	0.471527	0.334561	-0.271344	0.763355	-0.120642	0.170228	0.255763	0.312069	-0.744107	0.439199	0.16905	0.546849	-0.53497
58.8	-0.985682	0.625467	0.225704	0.760982	-0.161611	-0.390884	-0.265425	-0.879663	-0.471138	0.216002	0.208133	0.438201	0.354424	0.87256	0.491576	0.326628	-0.237803	0.792027	-0.126387	0.195332	0.240652	0.316874	-0.762966	0.443777	0.185699	0.515734	-0.5435
59	-1.01081	0.617429	0.203943	0.749892	-0.149077	-0.41015	-0.262059	-0.896027	-0.472299	0.195355	0.214946	0.481595	0.352208	0.847422	0.464563	0.287778	-0.255618	0.778025	-0.0762502	0.132974	0.234281	0.353792	-0.762038	0.45901	0.212833	0.502839	-0.515472
59.2	-0.999493	0.595019	0.228281	0.72978	-0.197009	-0.454774	-0.275696	-0.850939	-0.481757	0.207918	0.229528	0.446447	0.385383	0.839391	0.47451	0.286118	-0.255676	0.7923	-0.0959801	0.157857	0.267572	0.314315	-0.854536	0.438009	0.167002	0.525935	-0.551218
59.4	-0.985508	0.578968	0.251962	0.756009	-0.19904	-0.405971	-0.28237	-0.883725	-0.436147	0.158123	0.204645	0.443725	0.387396	0.822121	0.476396	0.282468	-0.26734	0.766303	-0.0580871	0.153783	0.247662	0.288706	-0.779679	0.427994	0.191357	0.513702	-0.543268
59.6	-0.980343	0.582792	0.199417	0.766762	-0.191264	-0.370458	-0.246275	-0.858192	-0.524583	0.201077	0.224161	0.423235	0.396983	0.779232	0.463356	0.290557	-0.299082	0.80791	-0.0839681	0.176971	0.194223	0.316717	-0.788151	0.416092	0.103222	0.527925	-0.557485
59.8	-0.983303	0.55499	0.214203	0.796937	-0.16312	-0.394946	-0.327574	-0.861964	-0.480307	0.17425	0.301391	0.410991	0.385795	0.79873	0.430854	0.256605	-0.306568	0.752939	-0.0869276	0.152616	0.17985	0.283275	-0.772715	0.424303	0.227915	0.543506	-0.507871
60	-1.01278	0.566532	0.200363	0.774166	-0.170141	-0.410382	-0.271054	-0.904906	-0.510076	0.159214	0.263609	0.429096	0.362827	0.767916	0.453608	0.296848	-0.304711	0.730105	-0.0743353	0.159986	0.203984	0.294921	-0.741844	0.393913	0.192198	0.541086	-0.562708
60.2	-1.0035	0.548224	0.192018	0.711048	-0.189117	-0.43899	-0.279352	-0.910186	-0.494582	0.194896	0.245097	0.44517	0.389776	0.817502	0.469206	0.318011	-0.296471	0.797494	-0.10451	0.186894	0.239457	0.270944	-0.70163	0.474022	0.214145	0.500135	-0.594856
60.4	-1.03263	0.554334	0.191171	0.725694	-0.196777	-0.438062	-0.236236	-0.924926	-0.526324	0.165667	0.229023	0.408763	0.362357	0.760303	0.492632	0.259976	-0.354326	0.783567	-0.0873918	0.265872	0.236956	0.312185	-0.705866	0.391087	0.204431	0.510859	-0.619461
60.6	-1.00762	0.532597	0.204825	0.756519	-0.182676	-0.437887	-0.230259	-0.920167	-0.517503	0.143744	0.209607	0.4099	0.405571	0.756833	0.459445	0.278511	-0.365873	0.780184	-0.0980111	0.219321	0.251278	0.253105	-0.813742	0.399153	0.081026	0.496497	-0.636289
60.8	-1.04017	0.535272	0.179014	0.724087	-0.210413	-0.475955	-0.308947	-0.868521	-0.487328	0.160085	0.27818	0.409523	0.415871	0.717762	0.454826	0.286089	-0.385545	0.81145	-0.0923823	0.216576	0.215033	0.29007	-0.786526	0.418512	0.146564	0.484537	-0.615863
61	-0.994677	0.547679	0.228774	0.705953	-0.221845	-0.484079	-0.257417	-0.844497	-0.524003	0.149883	0.238256	0.424355	0.432851	0.755428	0.46819	0.299976	-0.380265	0.812291	-0.105961	0.233022	0.205585	0.237008	-0.781884	0.363367	0.0895737	0.479436	-0.613367
61.2	-1.061	0.530664	0.250123	0.768172	-0.261073	-0.483847	-0.19167	-0.78554	-0.512629	0.211023	0.197664	0.387716	0.403209	0.711361	0.467854	0.259582	-0.416185	0.76798	-0.113795	0.167518	0.176646	0.210083	-0.804805	0.371171	0.109367	0.5156	-0.623174
61.4	-1.02752	0.52409	0.222861	0.784704	-0.25144	-0.482628	-0.271228	-0.850706	-0.534564	0.192645	0.225286	0.403244	0.419295	0.748929	0.486852	0.253831	-0.429415	0.774624	-0.111126	0.193968	0.190869	0.246664	-0.787919	0.342755	0.115513	0.502213	-0.631531
61.6	-1.03298	0.514782	0.213524	0.777038	-0.248655	-0.499921	-0.282137	-0.854188	-0.561896	0.186088	0.198889	0.39859	0.42551	0.698357	0.472305	0.266487	-0.420247	0.74514	-0.113041	0.161385	0.216135	0.260696	-0.752521	0.390222	0.0788847	0.461941	-0.598512
61.8	-1.07795	0.511434	0.219443	0.832242	-0.225849	-0.484949	-0.231536	-0.905718	-0.577447	0.176194	0.249125	0.392398	0.391116	0.612039	0.472496	0.299761	-0.450422	0.757042	-0.0846644	0.203026	0.214713	0.270329	-0.821692	0.337433	0.119552	0.445118	-0.582264
62	-1.09762	0.514747	0.171342	0.777143	-0.22289	-0.54588	-0.284459	-0.909258	-0.520521	0.198088	0.367852	0.374705	0.39577	0.672899	0.489893	0.24309	-0.450132	0.764823	-0.11629	0.170426	0.191403	0.239724	-0.793258	0.333313	0.152106	0.438572	-0.561606
62.2	-1.07841	0.474991	0.18636	0.778269	-0.125343	-0.545415	-0.303434	-0.858714	-0.489591	0.199951	0.399948	0.426142	0.407788	0.709255	0.492475	0.286704	-0.453962	0.73802	-0.1272	0.177215	0.15452	0.234142	-0.739871	0.359003	0.116586	0.452859	-0.571819
62.4	-1.03524	0.49052	0.202394	0.779801	-0.0875659	-0.521391	-0.250802	-0.841886	-0.512455	0.161715	0.242817	0.426943	0.402391	0.6982	0.500565	0.300231	-0.48727	0.774671	-0.12012	0.1603	0.182606	0.198059	-0.813452	0.371914	0.151195	0.41178	-0.566422
62.6	-1.10023	0.506617	0.22499	0.7549	-0.128244	-0.567757	-0.30767	-0.848675	-0.492667	0.140042	0.187892	0.445698	0.391389	0.693227	0.53143	0.308245	-0.490636	0.819017	-0.142635	0.160955	0.167901	0.218897	-0.833414	0.3691	0.107772	0.374183	-0.569962
62.8	-1.10778	0.497617	0.189587	0.752748	-0.0696929	-0.561083	-0.301983	-0.869102	-0.473053	0.141051	0.146831	0.469676	0.404904	0.579821	0.497739	0.276317	-0.499224	0.780265	-0.174551	0.139421	0.120022	0.22629	-0.843511	0.330127	0.0959337	0.428818	-0.572863
63	-1.08491	0.471289	0.177534	0.726994	-0.0779911	-0.566538	-0.303028	-0.852389	-0.499166	0.138701	0.191299	0.458209	0.390907	0.620482	0.525662	0.263626	-0.516807	0.823404	-0.127896	0.151102	0.132463	0.204727	-0.876587	0.37174	0.110447	0.398515	-0.582148
63.2	-1.0812	0.449598	0.170019	0.731561	-0.0811247	-0.581161	-0.311732	-0.831267	-0.444561	0.114915	0.189105	0.457037	0.412465	0.619687	0.487763	0.275563	-0.487793	0.808264	-0.193063	0.14339	0.150939	0.218131	-0.833298	0.361231	0.0480829	0.396849	-0.595262
63.4	-1.09071	0.466032	0.125378	0.702831	-0.108805	-0.584875	-0.310398	-0.795057	-0.436379	0.119261	0.207048	0.453085	0.393913	0.623668	0.487763	0.26427	-0.505607	0.81655	-0.135034	0.122482	0.157352	0.198198	-0.767435	0.348964	0.169422	0.379963	-0.612091
63.6	-1.08224	0.441845	0.175608	0.706725	-0.113563	-0.574314	-0.29856	-0.845136	-0.420827	0.135556	0.210651	0.469571	0.377189	0.625583	0.506066	0.288016	-0.500733	0.783306	-0.165325	0.149054	0.119058	0.241697	-0.803703	0.31573	0.159713	0.386201	-0.592999
63.8	-1.06652	0.44889	0.169364	0.688184	-0.110023	-0.586094	-0.287766	-0.772309	-0.439396	0.130061	0.228704	0.435003	0.382493	0.509275	0.485228	0.265257	-0.543326	0.863856	-0.205887	0.217528	0.0924461	0.206479	-0.857264	0.356333	0.0948601	0.396936	-0.612613
64	-1.0812	0.452668	0.148148	0.68743	-0.136368	-0.587486	-0.311906	-0.74933	-0.402374	0.108079	0.240635	0.450892	0.356844	0.56988	0.560718	0.27948	-0.553017	0.786439	-0.1637	0.206409	0.101725	0.212299	-0.853202	0.400163	0.139548	0.381176	-0.620911
64.2	-1.11834	0.429531	0.138939	0.702726	-0.163178	-0.57797	-0.290958	-0.840319	-0.482628	0.111462	0.221462	0.431528	0.365618	0.596522	0.573623	0.258322	-0.583773	0.844538	-0.22701	0.208707	0.0929046	0.245126	-0.853376	0.357012	0.138788	0.351215	-0.606288
64.4	-1.10528	0.432531	0.125	0.681169	-0.17078	-0.599208	-0.356415	-0.703313	-0.392915	0.0962006	0.249293	0.44163	0.37741	0.608882	0.558072	0.253471	-0.585572	0.812477	-0.144202	0.180053	0.0565261	0.245742	-0.845832	0.378599	0.11437	0.440841	-0.647605
64.6	-1.11985	0.435143	0.140227	0.703765	-0.174145	-0.584759	-0.328213	-0.806082	-0.42779	0.0961542	0.255647	0.438392	0.382238	0.654098	0.554926	0.219298	-0.588879	0.806262	-0.134627	0.215508	0.0542514	0.157241	-0.849778	0.405072	0.107249	0.386097	-0.651667
64.8	-1.15373	0.427053	0.107133	0.748639	-0.213431	-0.59149	-0.349045	-0.784669	-0.377711	0.11307	0.201657	0.456898	0.386201	0.619333	0.525796	0.214209	-0.586558	0.84517	-0.133757	0.16905	0.0843801	0.210779	-0.844439	0.393188	0.0693738	0.436315	-0.644935
65	-1.13139	0.46342	0.102259	0.662541	-0.239428	-0.595204	-0.313299	-0.779273	-0.426108	0.0811537	0.25986	0.463803	0.359624	0.524763	0.543593	0.264015	-0.601355	0.803854	-0.129579	0.161959	0.0817688	0.179118	-0.872351	0.398602	0.129968	0.371073	-0.655961
65.2	-1.17782	0.473053	0.135492	0.706214	-0.270938	-0.610292	-0.361579	-0.727279	-0.438584	0.0789312	0.25202	0.485071	0.426514	0.595471	0.528256	0.233091	-0.586268	0.855407	-0.139444	0.209125	0.110487	0.244355	-0.816295	0.397975	-0.00464233	0.408896	-0.65921
65.4	-1.14544	0.482669	0.131813	0.74413	-0.268094	-0.6136	-0.394134	-0.691765	-0.440615	0.0807765	0.251933	0.455917	0.389329	0.584858	0.554938	0.249426	-0.576055	0.827419	-0.157491	0.209618	0.103425	0.202748	-0.896607	0.396368	0.00255328	0.363895	-0.610234
65.6	-1.15269	0.457791	0.13291	0.71887	-0.215404	-0.6295	-0.369181	-0.771613	-0.397383	0.0720373	0.233602	0.471185	0.375001	0.573867	0.54776	0.250436	-0.618358	0.840012	-0.151224	0.232482	0.109257	0.187968	-0.878792	0.37904	-0.0445663	0.345946	-0.608087
65.8	-1.17445	0.487665	0.0857844	0.736041	-0.237571	-0.626076	-0.357169	-0.712481	-0.429067	0.0876239	0.251127	0.482994	0.331184	0.523422	0.577012	0.23803	-0.61505	0.878021	-0.157491	0.266417	0.116023	0.163897	-0.860339	0.386114	0.0287128	0.319166	-0.610872
66	-1.18298	0.444451	0.111996	0.766762	-0.263278	-0.622942	-0.359896	-0.70604	-0.499282	0.100147	0.263168	0.497826	0.312405	0.561281	0.584353	0.21928	-0.617546	0.811305	-0.150876	0.282799	0.0989454	0.18032	-0.915293	0.381901	0.00664433	0.322009	-0.59358
66.2	-1.16847	0.499213	0.10516	0.771236	-0.273723	-0.644239	-0.317709	-0.689328	-0.46725	0.0552901	0.224869	0.471568	0.29556	0.50418	0.567907	0.206926	-0.608261	0.761498	-0.137761	0.26185	0.113952	0.205684	-0.939085	0.343207	-0.0340631	0.327023	-0.600659
66.4	-1.21646	0.497884	0.10411	0.765102	-0.277147	-0.660313	-0.297051	-0.662112	-0.446766	0.0562476	0.203351	0.471597	0.305622	0.514532	0.600996	0.193585	-0.682306	0.760692	-0.149077	0.276393	0.084206	0.179728	-0.87798	0.371543	-0.0700991	0.334839	-0.600775
66.6	-1.17196	0.501116	0.0958757	0.836716	-0.290958	-0.689792	-0.333493	-0.677374	-0.41456	0.0744223	0.213889	0.472055	0.310833	0.451472	0.562818	0.193811	-0.671339	0.700811	-0.140488	0.215729	0.0525802	0.192918	-0.882913	0.357117	-0.0591897	0.329895	-0.616791
66.8	-1.14753	0.487717	0.113836	0.774601	-0.303086	-0.67395	-0.344635	-0.695072	-0.399704	0.0531546	0.226981	0.481937	0.279369	0.477028	0.567832	0.164292	-0.636463	0.673074	-0.196545	0.234791	0.0609305	0.213158	-0.881288	0.348122	-0.0619751	0.336424	-0.618996
67	-1.16023	0.46613	0.0714048	0.745326	-0.311558	-0.677141	-0.35949	-0.663795	-0.388505	0.0397847	0.276497	0.471127	0.306968	0.45348	0.583436	0.140593	-0.669249	0.707798	-0.136136	0.201436	0.108863	0.150864	-0.887149	0.356037	-0.0377769	0.294927	-0.621027
67.2	-1.17016	0.485396	0.0764359	0.741484	-0.336221	-0.708825	-0.38392	-0.691649	-0.414502	0.0787223	0.236532	0.472995	0.321609	0.48716	0.569126	0.164083	-0.682016	0.673404	-0.141823	0.206955	0.13927	0.151003	-0.85854	0.319595	-0.0851287	0.304206	-0.661241
67.4	-1.21031	0.463815	0.0558008	0.734242	-0.338252	-0.720779	-0.274594	-0.623639	-0.453497	0.0327458	0.198639	0.469815	0.300039	0.520683	0.579293	0.205881	-0.696407	0.627503	-0.162307	0.242968	0.171598	0.177244	-0.923939	0.299529	-0.0312196	0.299836	-0.626018
67.6	-1.19209	0.475595	0.072664	0.746985	-0.353223	-0.698786	-0.364191	-0.624161	-0.504099	0.0759427	0.230596	0.466008	0.30232	0.415018	0.566207	0.213895	-0.717646	0.66322	-0.107354	0.202591	0.118762	0.171012	-0.943205	0.296105	-0.0409105	0.257075	-0.661474
67.8	-1.14306	0.511457	0.0806662	0.738455	-0.373823	-0.679927	-0.359258	-0.602226	-0.468991	0.0383282	0.272644	0.480585	0.297863	0.466734	0.630736	0.188571	-0.684395	0.604089	-0.150295	0.217505	0.0956087	0.0996998	-0.90096	0.270154	-0.0173507	0.286136	-0.65039
68	-1.14979	0.452366	0.0688805	0.748552	-0.368717	-0.734126	-0.337149	-0.617313	-0.455528	0.0134221	0.284853	0.481224	0.296575	0.39125	0.610483	0.169886	-0.693099	0.631449	-0.13985	0.203995	0.0790124	0.105381	-0.86562	0.28555	-0.0113737	0.220928	-0.644819
68.2	-1.16987	0.466583	0.0692635	0.720971	-0.382818	-0.720083	-0.384036	-0.648127	-0.545241	0.01113	0.336366	0.480098	0.289223	0.389532	0.603067	0.193765	-0.722868	0.680008	-0.120584	0.20103	0.0180703	0.103727	-0.925506	0.295594	0.0348697	0.255723	-0.620795
68.4	-1.12843	0.468039	0.0510424	0.739262	-0.403244	-0.727743	-0.380265	-0.634142	-0.512339	-0.0142171	0.212375	0.495232	0.276039	0.384524	0.607419	0.172515	-0.725015	0.664091	-0.104162	0.221062	0.117724	0.123828	-0.847225	0.292792	-0.00847225	0.221723	-0.662344
68.6	-1.10064	0.440743	0.0811073	0.701334	-0.396455	-0.748517	-0.377421	-0.613425	-0.51466	-0.0342952	0.246206	0.49822	0.279462	0.453515	0.574128	0.192471	-0.75461	0.738565	-0.146059	0.225246	0.114282	0.132776	-0.923649	0.331851	0.00435798	0.251719	-0.682422
68.8	-1.11729	0.447834	0.0627701	0.607721	-0.381657	-0.735867	-0.367846	-0.577041	-0.55058	-0.011896	0.250738	0.509536	0.284366	0.416295	0.587417	0.177975	-0.72577	0.749788	-0.169271	0.239672	0.0597409	0.0853782	-0.899799	0.278702	-0.0942392	0.316398	-0.669888
69	-1.12849	0.464105	0.0611975	0.716828	-0.389259	-0.737782	-0.362856	-0.644587	-0.555338	-0.0247204	0.241395	0.479245	0.264067	0.408838	0.58737	0.187759	-0.717646	0.789967	-0.142635	0.248997	0.0508509	0.109518	-0.921096	0.260939	-0.000870436	0.298316	-0.679114
69.2	-1.11195	0.476999	0.0310688	0.683478	-0.408409	-0.763082	-0.36744	-0.678418	-0.544719	-0.0312777	0.264276	0.470256	0.306243	0.38204	0.568621	0.15799	-0.769059	0.830187	-0.120526	0.242562	0.0353339	0.10418	-0.921734	0.298972	-0.0257069	0.314082	-0.703371
69.4	-1.09797	0.455343	0.0606926	0.716508	-0.436089	-0.739058	-0.36361	-0.632691	-0.565203	-0.0237919	0.260179	0.472931	0.287784	0.382487	0.596632	0.154456	-0.738478	0.785812	-0.136136	0.210849	0.0261305	0.0750954	-0.9251	0.34435	-0.0940652	0.268141	-0.693332
69.6	-1.08805	0.452668	0.0417693	0.706179	-0.415024	-0.70604	-0.317709	-0.576751	-0.576461	-0.039808	0.248376	0.48257	0.299181	0.320384	0.629244	0.164518	-0.778054	0.799629	-0.168516	0.238459	0.0536943	0.0958524	-0.92922	0.281319	-0.0250105	0.300776	-0.699425
69.8	-1.13255	0.424808	0.0391754	0.738681	-0.396977	-0.733952	-0.385255	-0.568859	-0.627643	-0.0184532	0.259634	0.459027	0.300974	0.304513	0.622136	0.172254	-0.7867	0.861186	-0.132596	0.190829	0.0226778	0.0825	-0.915235	0.285567	-0.0641802	0.284569	-0.677316
70	-1.1376	0.43223	0.0298792	0.775344	-0.393437	-0.785946	-0.389839	-0.566074	-0.563753	-0.0154357	0.260272	0.471533	0.292745	0.280391	0.629529	0.150458	-0.776255	0.841724	-0.134802	0.227509	0.0162017	0.0350612	-0.926318	0.278447	-0.0573908	0.308251	-0.683293
70.2	-1.14567	0.40936	0.0357807	0.76151	-0.400053	-0.765636	-0.339876	-0.631821	-0.656541	-0.0121281	0.270183	0.496433	0.286815	0.305088	0.633358	0.161814	-0.79053	0.870558	-0.10805	0.243142	0.00602922	-0.016016	-0.901482	0.290917	-0.0992297	0.259228	-0.69513
70.4	-1.19731	0.423166	0.0449958	0.733644	-0.395236	-0.73726	-0.384675	-0.596133	-0.642034	-0.014043	0.304049	0.457791	0.316456	0.232343	0.638848	0.165186	-0.784379	0.859399	-0.0337729	0.263887	-0.00632517	0.0266876	-0.937866	0.328909	-0.0516459	0.257875	-0.705576
70.6	-1.12431	0.415105	-0.00754378	0.758144	-0.389143	-0.770858	-0.356299	-0.713874	-0.560561	-0.00516459	0.344484	0.511451	0.294173	0.29072	0.639086	0.171656	-0.794418	0.896979	-0.12041	0.21942	-0.0197879	0.0132016	-0.927131	0.280936	-0.0799641	0.320518	-0.711611
70.8	-1.15019	0.442959	0.0463652	0.67955	-0.403476	-0.79761	-0.381715	-0.617836	-0.690314	-0.0181051	0.291498	0.508294	0.277309	0.211533	0.623238	0.182542	-0.800685	0.976397	-0.146059	0.213588	-0.0435798	0.0650854	-0.940187	0.326013	-0.031974	0.310357	-0.714628
71	-1.15646	0.416306	0.0549071	0.684006	-0.389201	-0.779621	-0.383514	-0.657702	-0.70633	-0.00661532	0.290006	0.517718	0.286722	0.194902	0.612015	0.166219	-0.80202	0.963532	-0.122499	0.249409	-0.0408525	0.0329721	-0.962993	0.324191	-0.0540831	0.313235	-0.719967
71.2	-1.14967	0.412964	0.0286141	0.724	-0.397905	-0.787049	-0.390188	-0.656425	-0.704647	-0.0603503	0.241622	0.469653	0.273439	0.196655	0.579461	0.1839	-0.791459	0.95372	-0.17989	0.253639	-0.0192076	0.0183488	-0.963109	0.305871	-0.051878	0.253976	-0.696465
71.4	-1.17869	0.409563	0.00553597	0.680113	-0.399182	-0.772657	-0.408061	-0.683873	-0.672325	-0.0815889	0.330627	0.473082	0.296587	0.156533	0.588363	0.198645	-0.775733	0.987771	-0.116174	0.234107	-0.00841422	0.0130623	-0.95394	0.295113	-0.0400401	0.226429	-0.692867
71.6	-1.14857	0.410126	-0.00673137	0.661851	-0.417809	-0.793316	-0.376725	-0.72664	-0.646734	-0.0768885	0.383503	0.451536	0.27746	0.148444	0.577105	0.206467	-0.794592	0.999493	-0.195964	0.239602	-0.0175248	-0.0105033	-0.85738	0.293331	-0.0203102	0.266284	-0.685672
71.8	-1.13812	0.403633	0.0246624	0.72053	-0.426804	-0.804051	-0.410904	-0.643078	-0.644993	-0.0741612	0.276108	0.469484	0.314901	0.13248	0.630103	0.19539	-0.79082	1.0284	-0.191496	0.221143	-0.0161321	-0.0127084	-0.979821	0.268414	-0.0703893	0.232935	-0.705344
72	-1.19052	0.376835	0.037156	0.694016	-0.420305	-0.804689	-0.363784	-0.699657	-0.656657	-0.10805	0.253976	0.47928	0.283768	0.151851	0.59138	0.15958	-0.784495	1.05654	-0.151166	0.227474	-0.0456109	0.0105555	-0.910708	0.302633	-0.0329025	0.240815	-0.690256
72.2	-1.18907	0.405995	0.0464929	0.675139	-0.413747	-0.77051	-0.375274	-0.72664	-0.676967	-0.0927305	0.2784	0.465097	0.29314	0.0964095	0.623906	0.170652	-0.789138	1.05395	-0.135788	0.190846	-0.0135208	0.0632807	-0.93363	0.306254	-0.119076	0.25744	-0.700063
72.4	-1.17851	0.396333	0.0277843	0.656141	-0.426804	-0.817108	-0.414444	-0.755365	-0.718748	-0.0936009	0.255966	0.489005	0.302349	0.192349	0.59199	0.163961	-0.817166	1.03051	-0.142984	0.221555	0.0122383	0.069101	-0.955217	0.284128	-0.0476999	0.211522	-0.730586
72.6	-1.18275	0.374015	-0.0142752	0.604303	-0.43928	-0.829816	-0.390478	-0.664839	-0.708477	-0.137123	0.263469	0.482326	0.287865	0.181358	0.59315	0.208742	-0.838288	1.02872	-0.160102	0.185136	-0.0475258	0.115664	-0.974599	0.285225	-0.071898	0.232151	-0.690662
72.8	-1.20039	0.351697	-0.00760181	0.639011	-0.425643	-0.831093	-0.370748	-0.695014	-0.720083	-0.176118	0.293633	0.471185	0.296117	0.188403	0.603677	0.138777	-0.82233	1.01287	-0.167124	0.189877	-0.0256489	0.0633387	-0.909142	0.317564	-0.183024	0.307601	-0.733952
73	-1.23863	0.37438	0.0262233	0.63189	-0.410962	-0.807939	-0.413399	-0.65776	-0.714686	-0.153023	0.315516	0.461076	0.283722	0.178776	0.617122	0.142218	-0.830802	1.03159	-0.158593	0.195372	-0.0627875	0.0505201	-0.974134	0.251057	-0.0974308	0.311198	-0.716021
73.2	-1.20898	0.356183	0.0635767	0.629685	-0.446998	-0.827031	-0.403476	-0.692287	-0.747415	-0.193005	0.314918	0.477591	0.334004	0.164182	0.617743	0.124327	-0.840145	1.02394	-0.163062	0.177383	-0.0488605	0.0600717	-0.947499	0.278325	-0.106774	0.262976	-0.731225
73.4	-1.15606	0.319322	0.0560909	0.631095	-0.382586	-0.838172	-0.445779	-0.662054	-0.761226	-0.193411	0.277344	0.448919	0.309504	0.124832	0.610768	0.119163	-0.847863	1.01673	-0.139444	0.192099	0.00324963	0.0556905	-1.01301	0.275081	-0.146117	0.298879	-0.732965
73.6	-1.18246	0.320216	0.0716891	0.580668	-0.42367	-0.841422	-0.403128	-0.685788	-0.716775	-0.219176	0.339784	0.441323	0.311959	0.102781	0.61765	0.122058	-0.876007	0.978092	-0.189581	0.16829	-0.0250686	0.101261	-0.944423	0.28288	-0.0660371	0.294312	-0.742308
73.8	-1.19511	0.352567	0.0935255	0.634003	-0.436031	-0.816063	-0.428777	-0.732153	-0.703138	-0.233799	0.296122	0.452435	0.318104	0.158414	0.64349	0.0963167	-0.85738	0.97562	-0.151804	0.146355	-0.0968505	0.089742	-0.949356	0.265854	-0.0533868	0.310914	-0.696697
74	-1.21368	0.341913	0.0869334	0.62267	-0.422568	-0.845542	-0.425237	-0.696987	-0.763547	-0.245637	0.279387	0.476013	0.294039	0.133978	0.630091	0.100025	-0.894344	0.998286	-0.151746	0.141765	-0.145247	0.0489359	-0.987481	0.257446	-0.0963283	0.258375	-0.700817
74.2	-1.20619	0.308181	0.0546344	0.652688	-0.434058	-0.803703	-0.393263	-0.654626	-0.794824	-0.274478	0.270241	0.466502	0.278516	0.0963747	0.641755	0.106344	-0.867883	0.993969	-0.169561	0.159766	-0.0779331	0.046754	-0.954288	0.244581	-0.0752057	0.302332	-0.738014
74.4	-1.24739	0.303051	0.052644	0.64255	-0.385139	-0.787339	-0.419898	-0.702268	-0.851229	-0.239892	0.325439	0.479686	0.297057	0.111578	0.592431	0.115513	-0.887439	0.978028	-0.156388	0.158274	-0.112809	0.0462782	-0.94129	0.265785	-0.0326123	0.31616	-0.696639
74.6	-1.24136	0.344571	0.0189523	0.672023	-0.417229	-0.819371	-0.509089	-0.734358	-0.80672	-0.224398	0.325299	0.442524	0.267514	0.123811	0.595912	0.115513	-0.891675	1.00394	-0.163758	0.145769	-0.0870436	0.0418564	-0.973206	0.265338	-0.0476999	0.290807	-0.711088
74.8	-1.28511	0.370127	0.0386416	0.625031	-0.40719	-0.828249	-0.495801	-0.691939	-0.819777	-0.261943	0.345389	0.519825	0.295728	0.0937634	0.604918	0.117689	-0.877806	0.959035	-0.202696	0.143181	-0.0861152	-0.0246043	-1.01023	0.265512	-0.0909896	0.33506	-0.728497
75	-1.29387	0.356711	0.0171998	0.66076	-0.445896	-0.807707	-0.44694	-0.659094	-0.892778	-0.276973	0.257742	0.493085	0.265466	0.0975237	0.57609	0.108839	-0.910128	1.01641	-0.191206	0.169039	-0.108224	0.0176234	-1.00692	0.264531	0.0422916	0.338234	-0.753682
75.2	-1.29805	0.347223	0.0317883	0.656971	-0.437481	-0.82233	-0.486574	-0.673428	-0.913262	-0.269603	0.211121	0.511242	0.288718	0.110841	0.57414	0.135817	-0.876007	1.00367	-0.217377	0.147388	-0.0768885	0.0368775	-1.001	0.229726	-0.0330186	0.307305	-0.734242
75.4	-1.31523	0.322323	0.0369587	0.636805	-0.431852	-0.834226	-0.506594	-0.722984	-0.915351	-0.271866	0.246026	0.503443	0.270491	0.0614528	0.552628	0.145595	-0.91036	1.02614	-0.196428	0.153174	-0.0515298	0.0101957	-0.975585	0.269174	0.0370748	0.26557	-0.74695
75.6	-1.34802	0.329628	0.0163642	0.685416	-0.457501	-0.841306	-0.480481	-0.715963	-0.948137	-0.269255	0.240339	0.459254	0.260522	-0.045901	0.569027	0.164576	-0.941812	1.08265	-0.202057	0.156911	-0.0887265	-0.0197879	-0.974947	0.22907	0.0201941	0.28476	-0.740683
75.8	-1.35376	0.337433	0.00951677	0.60728	-0.442298	-0.82204	-0.440905	-0.68219	-0.989918	-0.274594	0.260191	0.473639	0.280849	-0.0127084	0.645788	0.142728	-0.909258	1.04109	-0.154764	0.202231	-0.0806604	0.00652247	-0.988235	0.263667	0.0462666	0.323274	-0.735345
76	-1.33827	0.329611	0.0278366	0.622072	-0.452279	-0.846412	-0.479552	-0.73842	-0.991021	-0.295542	0.219019	0.456149	0.261026	0.031533	0.594537	0.159864	-0.918252	1.0135	-0.185925	0.179316	-0.0786294	0.0521449	-1.01922	0.290859	0.0594624	0.332454	-0.752115
76.2	-1.35039	0.342134	-0.0254167	0.631821	-0.46609	-0.819661	-0.441021	-0.700295	-0.946048	-0.268733	0.256297	0.47809	0.250279	0.047816	0.632343	0.139798	-0.927189	1.09199	-0.157027	0.179763	-0.0622652	0.0755713	-1.06582	0.222582	0.0134802	0.311564	-0.717878
76.4	-1.38631	0.330093	-0.0321481	0.634124	-0.478276	-0.838578	-0.472763	-0.702036	-0.901308	-0.266412	0.249879	0.46472	0.25097	0.020345	0.591665	0.124797	-0.939143	1.07943	-0.135556	0.150028	-0.0246624	-0.0175828	-1.00756	0.270926	-0.00847225	0.311465	-0.721476
76.6	-1.36722	0.319038	0.0280048	0.597874	-0.47816	-0.840551	-0.511526	-0.659733	-0.951619	-0.280397	0.223534	0.467413	0.255473	-0.0122441	0.580755	0.147336	-0.928117	1.11891	-0.182792	0.16688	-0.0384153	0.00747995	-1.0371	0.239921	0.0490752	0.280217	-0.704067
76.8	-1.35208	0.311593	-0.00574488	0.621103	-0.449551	-0.859817	-0.493711	-0.767493	-1.02607	-0.289971	0.210913	0.458436	0.230718	0.0154067	0.592489	0.132556	-0.925796	1.10672	-0.145421	0.139931	-0.0357459	-0.049963	-1.01406	0.223458	-0.0148554	0.309179	-0.784843
77	-1.38672	0.316015	-0.000696349	0.640542	-0.45489	-0.858424	-0.494524	-0.678186	-0.998739	-0.279236	0.230613	0.472107	0.251481	-0.00963283	0.598831	0.114341	-0.896259	1.0869	-0.170257	0.119023	-0.0782232	-0.031858	-1.06884	0.224497	-0.0228054	0.312063	-0.718748
77.2	-1.3667	0.308407	-0.00423612	0.611197	-0.447346	-0.867071	-0.492899	-0.709232	-1.00431	-0.288869	0.315086	0.449284	0.230027	-0.00406204	0.571244	0.0893938	-0.917324	1.08973	-0.182908	0.157062	-0.0442762	-0.116638	-1.04859	0.195924	0.0504215	0.346027	-0.661358
77.4	-1.41185	0.320814	0.00840841	0.620308	-0.441253	-0.887439	-0.543965	-0.711785	-0.984115	-0.30268	0.402966	0.459033	0.199254	0.0122557	0.551625	0.110719	-0.921908	1.05474	-0.153139	0.136618	-0.0687064	-0.0441601	-1.06936	0.189558	-0.0641221	0.327888	-0.705169
77.6	-1.33159	0.298618	-0.00348175	0.66127	-0.425585	-0.875485	-0.47491	-0.677896	-0.948195	-0.321365	0.263974	0.471057	0.253436	0.0346202	0.571157	0.107389	-0.923011	1.11463	-0.220975	0.0883435	-0.0794418	-0.0463072	-1.02218	0.176484	0.00994619	0.314715	-0.712075
77.8	-1.3295	0.287511	0.0131436	0.685503	-0.478102	-0.877226	-0.545009	-0.672209	-0.983303	-0.355428	0.261218	0.481148	0.267456	0.0110139	0.566805	0.150812	-0.916685	1.07763	-0.284284	0.114422	-0.0224573	-0.0262872	-1.10162	0.165232	-0.018047	0.303573	-0.723507
78	-1.35521	0.272481	-0.00475839	0.698229	-0.501661	-0.880533	-0.524641	-0.696523	-1.02044	-0.379742	0.234153	0.484937	0.268402	-0.0785134	0.534506	0.134784	-0.896085	1.01325	-0.325021	0.105567	-0.0434638	-0.0532707	-1.02642	0.168046	-0.031858	0.298008	-0.741496
78.2	-1.36978	0.268843	-0.0326123	0.641372	-0.488431	-0.856625	-0.497077	-0.710102	-0.952896	-0.368485	0.244523	0.460345	0.26622	0.0123486	0.550487	0.0992471	-0.89446	0.987887	-0.352759	0.0911695	-0.0247204	-0.0385313	-1.05276	0.152152	-0.0567524	0.296598	-0.742018
78.4	-1.37512	0.283565	-0.0173507	0.613327	-0.517794	-0.77788	-0.483324	-0.624625	-0.996534	-0.356995	0.266795	0.472345	0.248266	-0.0375448	0.529156	0.106907	-0.922895	0.840998	-0.391928	0.112072	-0.00800801	-0.0451466	-1.03512	0.186976	-0.125401	0.27504	-0.761922
78.6	-1.39728	0.256802	-0.0341791	0.615921	-0.492957	-0.7614	-0.510946	-0.657992	-0.98133	-0.392857	0.252003	0.460322	0.239643	0.0129579	0.528749	0.117642	-0.955043	0.810753	-0.371096	0.104505	-0.0683002	-0.0552437	-1.06942	0.190672	0.014368	0.283983	-0.739
78.8	-1.3674	0.233294	0.0206061	0.623639	-0.484833	-0.748111	-0.540947	-0.715615	-1.00709	-0.388563	0.292095	0.486075	0.230283	-0.0733488	0.532266	0.0963921	-0.956958	0.730348	-0.323048	0.101708	-0.0136949	-0.049905	-1.09994	0.160433	-0.0461912	0.269075	-0.755016
79	-1.35405	0.277866	-0.031974	0.629331	-0.493595	-0.737434	-0.591432	-0.596249	-1.0606	-0.40249	0.353589	0.514329	0.232111	-0.0840261	0.511201	0.128784	-0.979415	0.712603	-0.273433	0.0951561	-0.0502532	-0.0189175	-1.0393	0.143489	-0.0353397	0.282683	-0.748865
79.2	-1.38202	0.250871	0.0137007	0.642057	-0.504331	-0.72693	-0.541992	-0.655555	-1.0169	-0.37893	0.289049	0.498406	0.203827	-0.0803703	0.515472	0.13421	-0.98899	0.670021	-0.287592	0.0632401	-0.0521681	-0.0616849	-1.09089	0.171691	-0.0771207	0.240827	-0.76111
79.4	-1.35718	0.258102	0.0164861	0.680606	-0.471428	-0.686078	-0.597293	-0.676213	-1.03681	-0.403012	0.268297	0.502741	0.194368	-0.103698	0.575852	0.115768	-0.9887	0.708912	-0.273955	0.0619983	-0.0198459	-0.0407364	-1.11155	0.188624	-0.0251266	0.235801	-0.75844
79.6	-1.35544	0.282161	-0.00116058	0.690001	-0.494408	-0.672383	-0.563695	-0.673486	-1.0917	-0.38276	0.317518	0.489295	0.213663	-0.0669075	0.585003	0.106698	-0.959221	0.676903	-0.243606	0.0872061	-0.0392857	-0.0524003	-1.05166	0.15752	0.0168633	0.244024	-0.765868
79.8	-1.33531	0.237664	-0.0345853	0.648353	-0.469978	-0.674994	-0.566886	-0.613135	-1.04748	-0.381889	0.271257	0.457002	0.17985	-0.0909316	0.591665	0.0894228	-0.988177	0.68544	-0.225269	0.0823723	-0.0190916	-0.0594218	-1.0436	0.148914	-0.0756699	0.232285	-0.766912
80	-1.32759	0.243072	-0.0406204	0.628449	-0.456109	-0.685033	-0.532475	-0.706098	-1.06588	-0.384965	0.238685	0.495853	0.206264	-0.100274	0.577749	0.0977732	-0.986901	0.688242	-0.223528	0.0514602	0.0676097	-0.0109675	-1.1213	0.194136	0.0828249	0.210216	-0.736041
80.2	-1.33084	0.231072	-0.0471196	0.604605	-0.489475	-0.65892	-0.537756	-0.652537	-0.959395	-0.432723	0.223801	0.530473	0.173629	-0.0989976	0.571795	0.0885524	-0.976397	0.715127	-0.209369	0.0765578	0.0432317	-0.0864053	-1.12437	0.181451	0.0650332	0.220853	-0.747241
80.4	-1.31552	0.248109	-0.0416069	0.632558	-0.49081	-0.674936	-0.521798	-0.671571	-0.969376	-0.436089	0.246931	0.488675	0.189535	-0.140546	0.566886	0.0744571	-1.00356	0.726948	-0.21639	0.0917266	0.0605359	-0.0385893	-1.1083	0.14816	0.00335988	0.260313	-0.758788
80.6	-1.3443	0.24631	-0.0409105	0.618706	-0.536421	-0.687122	-0.522204	-0.626134	-1.06222	-0.415778	0.242022	0.510749	0.177505	-0.144841	0.558367	0.0614122	-1.03791	0.749498	-0.187608	0.065393	0.0261537	-6.96349e-05	-1.05062	0.190167	0.0136659	0.2724	-0.773354
80.8	-1.33566	0.253204	-0.0344693	0.584579	-0.540135	-0.672615	-0.517271	-0.665536	-1.10284	-0.426746	0.247749	0.437301	0.172753	-0.153661	0.557056	0.0720895	-1.03652	0.760518	-0.138515	0.0738246	0.0412413	-0.0397499	-1.0386	0.195285	0.0185925	0.272174	-0.753334
81	-1.37308	0.258926	-0.0326704	0.628362	-0.513325	-0.674356	-0.513325	-0.6819	-1.04249	-0.452279	0.181794	0.435073	0.149001	-0.125691	0.55058	0.0700469	-1.03356	0.80242	-0.161553	0.0148496	0.0416591	-0.0490346	-1.02154	0.183117	-0.00655729	0.300997	-0.766274
81.2	-1.34558	0.235882	-0.0871017	0.607228	-0.556441	-0.686658	-0.514544	-0.648069	-1.08364	-0.416881	0.230178	0.431115	0.144829	-0.0987075	0.530879	0.0285329	-1.03739	0.82244	-0.136484	0.0568105	0.0305349	-0.0348175	-1.08555	0.223986	0.0347884	0.341948	-0.713061
81.4	-1.3233	0.249026	-0.053793	0.642411	-0.462608	-0.678766	-0.514544	-0.656483	-1.14712	-0.440905	0.204495	0.402292	0.159957	-0.133061	0.5521	0.0534796	-1.02601	0.818692	-0.15958	0.0691068	0.0109559	-0.0661532	-1.08039	0.237559	0.119366	0.347368	-0.731283
81.6	-1.33258	0.240536	-0.0124763	0.604797	-0.497832	-0.666232	-0.514312	-0.689966	-1.15101	-0.435915	0.297776	0.391818	0.175172	-0.100042	0.530891	0.0547853	-1.05445	0.857925	-0.139154	-0.00667335	0.0357285	-0.0530966	-1.0917	0.22806	0.0680449	0.39259	-0.756525
81.8	-1.37094	0.244256	-0.0205423	0.568418	-0.473982	-0.664491	-0.571761	-0.637275	-1.07157	-0.437655	0.285741	0.418808	0.199939	-0.146523	0.514741	0.0343126	-1.0429	0.854606	-0.168168	0.0539206	-0.0554178	-0.0654568	-1.06698	0.247593	0.11802	0.373684	-0.713119
82	-1.29794	0.254196	-0.00150876	0.575347	-0.47961	-0.652537	-0.555803	-0.670062	-0.972568	-0.492203	0.282294	0.42439	0.166097	-0.14455	0.525291	0.0240415	-1.04534	0.88257	-0.144783	0.0600021	-0.021877	-0.0786874	-1.06135	0.27601	0.0477812	0.374514	-0.734242
82.2	-1.29161	0.267125	-0.0275638	0.605766	-0.49081	-0.671106	-0.598338	-0.687471	-0.972393	-0.457559	0.264264	0.408867	0.171453	-0.151572	0.50566	0.014722	-1.05091	0.878816	-0.0911057	0.0662286	-0.0173507	-0.0567524	-1.08747	0.249322	0.0600659	0.400505	-0.73813
82.4	-1.30299	0.246084	-0.0385893	0.543019	-0.497948	-0.685614	-0.596423	-0.670236	-1.0252	-0.433535	0.385197	0.40448	0.183616	-0.0535608	0.537616	0.0272795	-1.04174	0.864709	-0.119076	0.0596249	-0.0157839	-0.0816469	-1.09356	0.271321	0.0397035	0.426624	-0.71782
82.6	-1.30415	0.251005	-0.0395178	0.61772	-0.493247	-0.679521	-0.554236	-0.683234	-1.00181	-0.474388	0.309498	0.351151	0.183883	-0.0516459	0.545764	0.0829062	-1.0516	0.925842	-0.100506	0.0683873	-0.00272737	-0.0471196	-1.07267	0.279387	-0.00568685	0.387356	-0.728845
82.8	-1.27571	0.25057	-0.0421871	0.588757	-0.49789	-0.659965	-0.563927	-0.666406	-1.03756	-0.462724	0.281279	0.381031	0.162882	-0.0714338	0.524287	0.0694028	-1.05596	0.898836	-0.112112	0.0479959	-0.02385	-0.0431156	-1.09983	0.290952	0.0365525	0.410683	-0.716659
83	-1.30438	0.236735	-0.0491506	0.560665	-0.501603	-0.666754	-0.575068	-0.716659	-1.07046	-0.471254	0.222048	0.35125	0.174047	-0.0380671	0.570368	0.0778228	-1.04789	0.935597	-0.0585513	0.0861906	-0.0652827	-0.0475839	-1.06953	0.312492	0.0438758	0.372895	-0.717704
83.2	-1.2962	0.240484	-0.023908	0.53396	-0.519418	-0.637682	-0.566074	-0.66159	-1.00245	-0.430112	0.214209	0.347397	0.169103	0.0348465	0.614685	0.0691707	-1.04638	0.92911	-0.130449	0.142473	-0.0562302	-0.0629616	-1.16134	0.31746	0.0194862	0.397076	-0.735461
83.4	-1.3002	0.214568	-0.0472937	0.554352	-0.50671	-0.638378	-0.572399	-0.678012	-1.11689	-0.441369	0.265698	0.399362	0.142659	0.000847225	0.612973	0.0660313	-1.07708	0.937698	-0.0954578	0.103889	-0.00806604	-0.0993458	-1.08068	0.339134	0.045843	0.433883	-0.736389
83.6	-1.30142	0.227898	-0.0366744	0.602278	-0.49876	-0.597816	-0.536421	-0.652131	-1.08561	-0.435973	0.256924	0.362223	0.139821	0.0852563	0.614273	0.0464349	-1.07104	0.918281	-0.0799641	0.110139	0.000876239	-0.0785134	-1.16383	0.345911	0.0448855	0.472194	-0.757686
83.8	-1.31958	0.278795	-0.0297689	0.555605	-0.486574	-0.608261	-0.5547	-0.699715	-1.0523	-0.438294	0.236045	0.375825	0.144794	0.0843627	0.590382	0.0290842	-1.10656	0.926411	-0.130101	0.122964	-0.0281441	-0.101435	-1.12704	0.398967	0.0875021	0.498963	-0.745906
84	-1.3168	0.246571	-0.0247784	0.59098	-0.498644	-0.604547	-0.544255	-0.578086	-1.10029	-0.439628	0.270961	0.344954	0.108642	0.0809854	0.602023	0.0305871	-1.09959	0.954811	-0.0888425	0.0623465	-0.0124763	-0.0804283	-1.13325	0.404335	0.0805038	0.481502	-0.726408
84.2	-1.31511	0.24837	0.00481641	0.54845	-0.485994	-0.617429	-0.587022	-0.715789	-1.09878	-0.429067	0.290592	0.330098	0.140854	0.151056	0.586558	0.00664433	-1.07627	0.965024	-0.114433	0.0886684	0.0122557	-0.0905834	-1.14317	0.437441	0.0555745	0.436762	-0.774456
84.4	-1.32144	0.253767	0.0375622	0.544696	-0.509669	-0.590562	-0.559226	-0.658746	-1.19163	-0.393437	0.247848	0.380102	0.148659	0.198535	0.572091	-0.00864633	-1.05625	0.973281	-0.178846	0.0747124	0.0538104	-0.0712597	-1.17172	0.425069	0.0620389	0.46848	-0.760645
84.6	-1.33455	0.224932	0.0845368	0.561896	-0.481583	-0.567234	-0.539438	-0.646386	-1.14381	-0.35479	0.243954	0.435885	0.121687	0.262611	0.580181	-0.0449725	-1.07754	0.950789	-0.133699	0.0716601	-0.0345273	-0.0249525	-1.10371	0.434882	0.0426282	0.387628	-0.757106
84.8	-1.33844	0.23102	0.0897536	0.562319	-0.487676	-0.543675	-0.538626	-0.667393	-1.21345	-0.33918	0.232209	0.471034	0.119459	0.186714	0.602899	-0.0208905	-1.09454	0.941969	-0.187898	0.10205	0.0102479	-0.00853028	-1.14938	0.4662	0.0545473	0.39736	-0.700817
85	-1.33014	0.250982	0.169811	0.585676	-0.453729	-0.541876	-0.525047	-0.656251	-1.17381	-0.313647	0.250448	0.490758	0.0922256	0.250442	0.58614	0.0105033	-1.09217	0.92655	-0.153893	0.0825406	-0.00353977	0.0431272	-1.11102	0.459068	0.0354268	0.406401	-0.70987
85.2	-1.31877	0.231977	0.202371	0.562018	-0.404173	-0.549884	-0.574256	-0.663389	-1.15942	-0.347536	0.272574	0.580094	0.0739465	0.214783	0.588363	0.0711263	-1.12321	0.891988	-0.140663	0.139357	0.00980111	-0.00905254	-1.16685	0.436437	0.00591897	0.426653	-0.704067
85.4	-1.35556	0.210025	0.177819	0.545102	-0.430112	-0.531198	-0.583947	-0.62625	-1.14544	-0.344983	0.210123	0.611528	0.0751012	0.271501	0.584295	0.117776	-1.1076	0.851908	-0.178265	0.144887	0.00291886	-0.0240821	-1.15849	0.466473	-0.0428835	0.469217	-0.747183
85.6	-1.34012	0.210698	0.207605	0.535458	-0.41015	-0.508973	-0.556905	-0.654452	-1.15942	-0.317303	0.27027	0.633544	0.0529167	0.335135	0.56305	0.114103	-1.10337	0.812378	-0.154531	0.192175	0.0174958	-0.041839	-1.12582	0.480017	0.0222832	0.449569	-0.732791
85.8	-1.37308	0.22452	0.219687	0.532852	-0.427384	-0.519186	-0.507116	-0.604373	-1.19273	-0.33889	0.311941	0.67287	0.0793722	0.285045	0.566996	0.167362	-1.10325	0.821605	-0.160276	0.147934	-0.0476999	0.00241401	-1.16633	0.487943	-0.0470036	0.427924	-0.744397
86	-1.36595	0.189947	0.238476	0.554897	-0.423728	-0.517329	-0.57472	-0.633504	-1.20671	-0.308599	0.423131	0.691242	0.0675807	0.358718	0.582426	0.180157	-1.10296	0.818773	-0.142694	0.119853	-0.0362102	-0.0091686	-1.16145	0.502938	-0.0114898	0.418755	-0.752347
86.2	-1.35846	0.199678	0.253692	0.541011	-0.428197	-0.526904	-0.581277	-0.640931	-1.25134	-0.3162	0.308494	0.726089	0.05912	0.34084	0.580622	0.179467	-1.11236	0.804811	-0.187492	0.146442	-0.0561722	-0.0445083	-1.16029	0.48691	0.0509437	0.433332	-0.744919
86.4	-1.38301	0.211325	0.25798	0.59593	-0.438816	-0.541934	-0.594276	-0.653582	-1.27443	-0.319508	0.243148	0.76108	0.0424367	0.385133	0.547626	0.209758	-1.10934	0.794575	-0.133293	0.158211	-0.0301751	-0.061859	-1.13946	0.514759	0.0472589	0.403157	-0.759137
86.6	-1.34465	0.190904	0.260725	0.556453	-0.423148	-0.512049	-0.581161	-0.662228	-1.20985	-0.331984	0.274774	0.807382	0.056207	0.420949	0.558466	0.244593	-1.11172	0.801724	-0.181225	0.157033	-0.0312196	-0.0597119	-1.17445	0.491947	0.0204146	0.407863	-0.760355
86.8	-1.27797	0.192744	0.305233	0.525744	-0.426282	-0.510366	-0.569788	-0.593522	-1.27745	-0.345331	0.238912	0.824112	0.0616791	0.370411	0.550975	0.244424	-1.13174	0.745041	-0.210878	0.147701	-0.0365003	-0.0169445	-1.16372	0.535719	0.108996	0.407022	-0.758092
87	-1.30803	0.188078	0.297492	0.553539	-0.431214	-0.508683	-0.581103	-0.689908	-1.25633	-0.292467	0.25798	0.832439	0.0447288	0.441752	0.54303	0.247157	-1.13725	0.836565	-0.225211	0.187887	-0.0369065	-0.0667335	-1.14271	0.508439	0.0183082	0.409842	-0.769698
87.2	-1.30136	0.192239	0.315057	0.558106	-0.412993	-0.492551	-0.584875	-0.617604	-1.29707	-0.25469	0.252682	0.887207	0.0722114	0.425533	0.597409	0.238993	-1.1	0.810916	-0.196893	0.167518	-0.0713758	-0.0482222	-1.19302	0.522297	0.114201	0.394563	-0.775675
87.4	-1.31384	0.192187	0.350374	0.487073	-0.45077	-0.518374	-0.563346	-0.677199	-1.28407	-0.275812	0.237658	0.870042	0.0460229	0.463838	0.553261	0.281499	-1.13447	0.837679	-0.262175	0.139107	-0.0604663	-0.0623232	-1.16876	0.54346	0.0371618	0.36892	-0.7979
87.6	-1.29974	0.183848	0.366094	0.568047	-0.450074	-0.507464	-0.620331	-0.610408	-1.29753	-0.251382	0.288201	0.856074	0.0355776	0.417792	0.588229	0.23453	-1.12901	0.825348	-0.222077	0.147168	-0.0347594	-0.0553597	-1.20642	0.516871	0.0668205	0.321998	-0.76169
87.8	-1.27815	0.164768	0.377769	0.536287	-0.407886	-0.544951	-0.605824	-0.592129	-1.33026	-0.241111	0.233155	0.909664	0.0394366	0.454147	0.534599	0.24938	-1.11851	0.835642	-0.237107	0.15445	-0.0703893	-0.00330766	-1.16366	0.566608	0.0425469	0.348436	-0.760355
88	-1.30908	0.187956	0.395921	0.523985	-0.460519	-0.492261	-0.605475	-0.654742	-1.38457	-0.276741	0.212694	0.89001	0.0156679	0.440418	0.550377	0.23771	-1.10986	0.842756	-0.237339	0.147707	-0.0727685	-0.0526904	-1.12553	0.585484	0.034655	0.327075	-0.77051
88.2	-1.2908	0.208145	0.415401	0.54859	-0.418622	-0.525395	-0.593986	-0.570136	-1.3313	-0.257765	0.246067	0.89587	0.0404173	0.462277	0.547841	0.212183	-1.11485	0.84636	-0.211574	0.19543	-0.0703313	-0.0552437	-1.2424	0.534042	0.0717994	0.319833	-0.762154
88.4	-1.30873	0.18256	0.420496	0.476535	-0.448217	-0.523364	-0.602458	-0.577622	-1.27461	-0.242155	0.284	0.896213	0.0176524	0.448286	0.520434	0.239335	-1.09251	0.864192	-0.196486	0.275957	-0.102479	-0.0681842	-1.17515	0.532098	0.0592245	0.284963	-0.743353
88.6	-1.33212	0.167193	0.415482	0.5087	-0.460403	-0.458894	-0.60565	-0.579362	-1.31993	-0.215868	0.222896	0.890828	0.0235424	0.447137	0.507168	0.227045	-1.13981	0.839222	-0.270532	0.264322	-0.0587254	-0.0544313	-1.12913	0.523956	0.0414212	0.27406	-0.716021
88.8	-1.3103	0.140564	0.424193	0.457658	-0.454194	-0.471428	-0.583192	-0.608029	-1.345	-0.241227	0.264096	0.90302	0.0183256	0.412662	0.52539	0.243287	-1.11207	0.81427	-0.240124	0.273601	-0.0181631	-0.00632517	-1.10743	0.510343	0.0272969	0.336615	-0.721998
89	-1.32742	0.13172	0.468179	0.480429	-0.452047	-0.46667	-0.584179	-0.5977	-1.27977	-0.214417	0.279665	0.873721	0.00510076	0.452238	0.524455	0.221451	-1.10325	0.794894	-0.19167	0.224306	-0.0131146	-0.00934268	-1.1542	0.488239	0.0206642	0.326872	-0.731108
89.2	-1.34308	0.124403	0.482158	0.478792	-0.46638	-0.4911	-0.648243	-0.579885	-1.32666	-0.227706	0.253813	0.896857	0.0136949	0.407724	0.499102	0.224752	-1.13575	0.741989	-0.177047	0.222942	-0.0464813	-0.0602342	-1.18507	0.476227	0.0881288	0.339238	-0.753218
89.4	-1.31947	0.110801	0.482692	0.532092	-0.401271	-0.502416	-0.614876	-0.592361	-1.37036	-0.253935	0.240478	0.886365	0.028353	0.390292	0.487497	0.234484	-1.14317	0.748674	-0.180296	0.266545	0.00575068	-0.0448565	-1.19348	0.477162	0.0644761	0.376365	-0.748691
89.6	-1.33322	0.0898406	0.488088	0.526643	-0.424483	-0.497832	-0.605882	-0.622536	-1.35399	-0.230201	0.233904	0.923864	-0.00400401	0.417955	0.47563	0.198135	-1.13911	0.703347	-0.185751	0.223615	-0.0543152	-0.013985	-1.17625	0.414786	0.0226023	0.407405	-0.74196
89.8	-1.32684	0.093746	0.493456	0.464389	-0.429183	-0.496961	-0.609421	-0.61888	-1.33757	-0.261827	0.294318	0.92481	0.0708071	0.408554	0.455209	0.252972	-1.14892	0.659454	-0.199562	0.22253	-0.0381251	-0.071724	-1.13662	0.41333	-0.02002	0.349799	-0.760007
90	-1.29033	0.0554642	0.470088	0.508335	-0.435973	-0.533577	-0.635302	-0.582844	-1.3562	-0.265657	0.351088	0.888274	0.0800337	0.47961	0.475856	0.232557	-1.17631	0.676677	-0.164803	0.212949	-0.0725944	-0.0597119	-1.16818	0.390919	0.00465974	0.351215	-0.76111

## Sheet: Fig5E
wild type	flwr-1
0.0565919	0.367636
0.320838	0.15773
0.12142	0.136706
0.253649	0.105737
0.145993	0.353058
0.137092	0.324017
0.00596344	0.13632
0.0895077	0.442391
0.0438157	0.0682819
0.119851	0.137082
0.177979	0.250155
0.204126	0.0949414
0.259302	0.0724526
0.445821	0.130326
0.179984	0.16903
0.215328	0.0370053
0.214395	0.357914
0.236286	0.167295
0.0952695	0.0253897
0.161928	0.400935
0.112643	0.444044
0.149694	0.168297
0.126664	0.11962
0.222701	0.129909
0.0915524	0.395954
0.183441	0.387122
0.0681582	0.332722
	0.716309
	0.25372
	0.200073
	0.320788
	0.647697

## Sheet: Fig5F
wild type	flwr-1
11.7	18.48
13.76	7.038
11.96	12.43
7.444	34.15
12.1	20.63
15.71	14.71
23.63	24.65
7.79	20.91
26.9	13
21.24	17.87
6.328	17.92
5.185	11.45
12.02	17.84
16.97	7.93
10.34	9.313
12.33	11.88
16.94	24.01
18.55	11.68
7.693	20.7
9.362	14.18
17.42	22.6
15.69	18.06
14.6	11.95
13.47	31.55
16.33	19.9
11.51	28.39
11.4	15.42
	14.63
	12.85
	21.33
	13.87
	16.73

## Sheet: Fig5I+J
Time (s)	wild type									flwr-1
1	14.3	21.5	19.5	13	13.1	14.7	22.1	14.9	19.7	14.7	22.7	14.7	19.4	22.3	17.3	20.5	15.5
2	18.1	47	39.3	28.1	37.1	33.2	35	22.1	61.1	14.8	33	27.4	27	40.2	21.9	35.2	23.9
3	16.2	54.5	34.3	29.1	38.7	37.4	34.1	24.2	50.2	16.4	28.6	25.8	23.4	41.4	19.5	40.2	24.3
4	16.1	48.7	32.9	27	34.8	37.7	29.5	23.9	47.3	16.3	26.3	27.1	21.4	39.2	21.7	35.7	19.1
5	15.8	51.3	28.6	26	36	41.1	30.1	21.3	52.3	12.3	25.3	22.7	23.2	40.7	22	42.1	18.4
6	16.4	51.1	29.7	27.5	34.1	38.3	29.2	25.6	52.2	15.6	24.1	23.4	22.6	37.7	18.8	36	19.2
7	15	49.9	29.5	26.7	38	35.4	29.4	24.7	42.9	13.3	19.6	24	21.5	35.2	16.1	35.2	18.1
8	14.7	49.2	29.1	31.2	33	40.4	26.7	23	46.5	15.4	21.6	24.7	21	35.4	18.4	30.4	15
9	14.5	47.2	28.2	30	29	34.9	27.4	21.2	46.2	13.4	20.1	20.9	19.2	33.8	20.3	30.3	17.3
10	17.3	48.5	27.4	29.4	32.3	33.3	27.5	23.8	45.9	16.2	20.1	21.3	20.9	31.3	15.6	23.5	18.9
11	16.1	44.2	26.8	26.5	27.9	34.3	26.2	31.5	43.3	15.7	18	21.9	22.4	32.9	18.1	22.9	13.8
12	15.1	48.6	28.6	27.4	31.7	31.8	20.9	27.4	39.1	12.3	19.2	20.4	20.7	32.2	21.4	21.7	16.5
13	15.9	44	26	26.5	26	35.1	23.9	19.9	40	13	16.5	19.1	22.9	29.7	17.4	18.8	25.2
14	16.3	44.2	26.1	22.9	29.6	36.9	21.8	17.8	46.7	12.3	17.3	19.5	20.6	31.1	18.5	19.9	14.1
15	16.1	45.4	25.2	25.7	27.2	31.1	25.4	23.3	37.8	22.8	19	16.7	18.3	28.6	19.9	20.4	18.5
16	13.6	45.3	23.3	26.7	28.3	33.9	25.6	17.8	36	21	15.1	18.4	19.1	27.1	15.1	18.8	14.7
17	12.7	44.5	24.7	21.8	30.9	30.3	23.4	18.6	32.9	22	22.2	16.3	20.7	28.3	20.9	20.5	12.6
18	15.6	42.6	23.5	22.6	23.6	38.4	19.4	21.3	33.8	13.9	19.2	17.2	21.6	28.8	19.2	17.1	18.6
19	11.8	41.8	26.4	23.6	24.6	35.2	21.5	19	33.7	18.3	15.3	16.5	17.5	26.8	19.3	23.1	15.5
20	12	37.5	28.8	23	24	38.2	26.6	15.9	30.5	21	15.6	19.6	19.8	27.6	19.6	20.9	12.9
21	13.7	36.7	23.3	23.7	23.4	34.4	23.4	18.1	33.6	14.6	18.7	16.3	19.3	25.1	19.4	15.2	14.4
22	12.1	40.8	20.9	20.7	27.1	34.6	23.9	16.7	32.2	15	16.2	15.6	17.1	22.7	18.2	18.1	12.4
23	12.8	32.8	19.5	21.9	22	33.9	23.4	18	34.2	17.3	18.2	16.4	19.7	20.2	15.1	21.5	11.1
24	11.7	34.6	20.4	18.7	24.1	29.8	21.5	16.5	27.5	9.2	16	14.8	17.3	24.1	23.7	18	12
25	12	39	19.7	18.7	22.8	26.7	18.5	19.1	35.5	10.5	17.6	17	15.5	22.1	17.6	17.1	12.7
26	13.2	30.8	20.3	20.2	20.8	26.9	16.9	15.6	28.4	17.1	16.4	14.9	17.4	21.8	17.3	19.4	17.7
27	13.3	34.2	18.3	20.6	25.5	30.7	20.8	15.4	34.7	12.1	25.6	14.6	15.1	17.1	18.1	17.4	17.9
28	12.5	29.4	18.8	18.3	20.3	27.8	20.3	16.4	29.9	9.9	14	14.5	17.4	20.5	22.1	22	12.5
29	12.6	33.6	19.2	17.9	17.4	26.8	19.9	14.8	31.4	10.4	13.8	16.5	19.6	19.2	17.4	17.6	16.5
30	14.7	27.4	14.6	16.7	17.6	28.4	24.1	13.7	29.7	10.7	17.2	17.2	20.4	21.4	20.5	24.9	15.9
31	12.9	33.2	15.6	13.6	18.2	27	19.7	16.1	28	9.2	12.6	20.2	18	17.1	17.5	20.4	11.3
32	9.9	20.6	15.1	14.2	13.7	22	17.7	11.7	18.5	9.6	15.5	15.6	19.8	21.5	14.5	15.2	12.1
33	11.5	20.2	11.8	16.1	14.6	19.8	17.1	14.3	17.1	15.4	15.8	12	17.8	15	16	12.4	10.3
34	8.7	21.5	17.4	15.9	14.3	19	18.3	14.9	17.4	26.2	15.3	13.4	20.2	16.3	13.4	17.9	9.8
35	10.7	22.6	13.4	18.4	12.4	20.7	16	22.3	15.3	13.8	14.7	12.3	16	16.5	15.8	16	9.9
36	12.4	22	14.6	15.6	17.8	18.1	16.9	13.6	18.4	10.7	14.4	11.5	15.9	17.2	15.9	16	18.3
37	10.5	17	16.4	14.3	16.2	19.8	18.1	14	21.4	19.4	15.8	15.2	17.5	17.9	14.9	14.3	9.4
38	11.7	18.4	13.3	13.9	20	22.3	15.8	15.4	17.1	0	13.6	14.3	21.6	14.9	18.3	18.1	12.5
39	9.7	22.3	13.4	15.1	19.4	17.1	15.1	12.6	19.1	12.5	16.8	13.6	17.7	18.2	16.7	19	8.8
40	10.3	20	14.6	16.4	16.3	19.3	18.8	14.8	16	10	14.6	16.7	17.9	17.7	18.4	22.6	10
41	11.9	17.3	13.6	16.6	16.5	18.3	16	14.1	18.4	0	17.3	16.2	17.2	16.3	20.7	21.6	12.9
Mean amplitude during stimulation
wild type	flwr-1
14.36	14.7333
41.9333	19.4133
24.9667	19.3633
23.7567	20.02
27.5333	28.6433
33.4633	19.02
24.5333	24.1433
20.09	16.3667
38.7833

## Sheet: Fig5G
Time (s)	wild type	flwr-1
0	-80.8093	-195.85
0.0002	-78.3775	-195.476
0.0004	-78.9387	-192.982
0.0006	-79.9363	-198.407
0.0008	-77.3175	-198.718
0.001	-76.0704	-197.409
0.0012	-77.5046	-195.476
0.0014	-78.6269	-196.287
0.0016	-79.3128	-194.104
0.0018	-80.934	-195.726
0.002	-78.4399	-198.22
0.0022	-76.694	-196.848
0.0024	-74.1998	-195.538
0.0026	-75.9457	-196.162
0.0028	-79.0634	-197.409
0.003	-80.4351	-206.887
0.0032	-80.9963	-216.801
0.0034	-83.4281	-227.525
0.0036	-79.9987	-232.763
0.0038	-78.1281	-237.627
0.004	-79.1257	-234.758
0.0042	-81.3081	-231.391
0.0044	-76.881	-228.523
0.0046	-77.8787	-225.094
0.0048	-76.9434	-227.338
0.005	-75.8834	-227.276
0.0052	-80.3728	-224.283
0.0054	-84.4881	-222.163
0.0056	-81.0587	-220.667
0.0058	-80.1857	-216.24
0.006	-79.2504	-212.685
0.0062	-79.001	-211.376
0.0064	-79.1257	-212
0.0066	-74.9481	-217.549
0.0068	-75.9457	-229.645
0.007	-77.5669	-241.43
0.0072	-74.8857	-248.476
0.0074	-79.5622	-252.591
0.0076	-75.4469	-249.536
0.0078	-73.8257	-245.92
0.008	-77.8787	-239.248
0.0082	-79.7493	-230.83
0.0084	-79.9363	-230.83
0.0086	-80.934	-225.094
0.0088	-79.9987	-219.918
0.009	-79.6869	-216.427
0.0092	-78.7516	-213.184
0.0094	-72.3293	-209.318
0.0096	-76.9434	-205.515
0.0098	-74.0751	-204.891
0.01	-75.5093	-204.704
0.0102	-83.4904	-204.018
0.0104	-83.8645	-203.021
0.0106	-83.054	-201.711
0.0108	-78.3152	-202.709
0.011	-78.3775	-199.903
0.0112	-76.881	-200.09
0.0114	-78.3152	-200.402
0.0116	-79.8116	-197.284
0.0118	-80.3104	-200.402
0.012	-80.5598	-198.407
0.0122	-78.3775	-197.908
0.0124	-76.0081	-197.721
0.0126	-73.3269	-199.529
0.0128	-78.1904	-200.153
0.013	-77.6293	-201.337
0.0132	-81.6198	-198.718
0.0134	-81.7446	-199.903
0.0136	-83.3034	-201.025
0.0138	-82.6175	-199.28
0.014	-80.1857	-197.035
0.0142	-82.9916	-195.538
0.0144	-73.8881	-196.723
0.0146	-74.0128	-196.224
0.0148	-77.941	-196.973
0.015	-79.4375	-197.908
0.0152	-81.3081	-194.728
0.0154	-73.3893	-196.224
0.0156	-79.8116	-195.164
0.0158	-77.1928	-194.229
0.016	-75.2599	-195.164
0.0162	-76.4446	-198.469
0.0164	-77.754	-198.22
0.0166	-79.1881	-194.291
0.0168	-78.3152	-192.047
0.017	-77.941	-191.423
0.0172	-74.6363	-195.913
0.0174	-77.3175	-192.483
0.0176	-77.2552	-191.361
0.0178	-79.1881	-193.481
0.018	-77.8787	-199.342
0.0182	-79.001	-208.633
0.0184	-80.3104	-217.113
0.0186	-77.2552	-232.327
0.0188	-76.3199	-246.605
0.019	-75.0104	-256.769
0.0192	-80.4975	-264.127
0.0194	-80.934	-269.177
0.0196	-77.4422	-265.623
0.0198	-79.1881	-261.819
0.02	-79.001	-258.577
0.0202	-81.4951	-250.471
0.0204	-79.6869	-239.622
0.0206	-80.4351	-230.768
0.0208	-80.8093	-225.405
0.021	-81.6822	-220.355
0.0212	-83.9892	-218.983
0.0214	-82.6798	-214.431
0.0216	-82.4928	-210.441
0.0218	-78.5646	-211.127
0.022	-78.6269	-211.438
0.0222	-78.0034	-214.681
0.0224	-72.5163	-212.997
0.0226	-72.641	-212.935
0.0228	-76.5069	-210.254
0.023	-79.9987	-209.505
0.0232	-83.4904	-207.51
0.0234	-80.2481	-207.136
0.0236	-79.001	-203.021
0.0238	-79.001	-202.21
0.024	-77.0681	-202.397
0.0242	-78.814	-200.464
0.0244	-76.4446	-200.776
0.0246	-74.0128	-201.4
0.0248	-73.2646	-201.898
0.025	-70.9575	-198.033
0.0252	-70.9575	-197.97
0.0254	-80.6222	-200.589
0.0256	-80.934	-203.083
0.0258	-86.5457	-200.277
0.026	-88.1045	-203.894
0.0262	-90.3492	-200.651
0.0264	-94.6516	-199.591
0.0266	-93.7786	-198.781
0.0268	-95.2127	-201.025
0.027	-93.0304	-198.531
0.0272	-89.601	-203.831
0.0274	-88.6657	-201.524
0.0276	-84.1763	-202.335
0.0278	-85.9845	-201.088
0.028	-87.7304	-198.718
0.0282	-84.301	-199.217
0.0284	-81.3081	-202.709
0.0286	-79.2504	-199.217
0.0288	-78.7516	-199.342
0.029	-78.2528	-202.709
0.0292	-79.8116	-200.215
0.0294	-80.1857	-207.635
0.0296	-79.3751	-207.573
0.0298	-81.3081	-204.517
0.03	-77.1928	-205.203
0.0302	-77.6916	-203.333
0.0304	-80.2481	-201.961
0.0306	-80.061	-199.654
0.0308	-75.7587	-199.404
0.031	-78.1904	-202.584
0.0312	-78.8763	-203.831
0.0314	-78.4399	-203.831
0.0316	-74.8234	-204.393
0.0318	-78.0034	-208.196
0.032	-74.1998	-210.69
0.0322	-78.7516	-207.011
0.0324	-74.9481	-204.704
0.0326	-73.0152	-205.515
0.0328	-76.1328	-204.018
0.033	-80.2481	-200.215
0.0332	-76.3199	-199.778
0.0334	-76.0081	-199.654
0.0336	-72.5787	-196.037
0.0338	-77.0681	-196.848
0.034	-73.8881	-197.596
0.0342	-77.4422	-196.598
0.0344	-75.9457	-199.404
0.0346	-76.5069	-199.28
0.0348	-76.1328	-203.52
0.035	-79.9363	-201.711
0.0352	-80.7469	-203.707
0.0354	-82.4928	-205.453
0.0356	-79.001	-207.947
0.0358	-78.6269	-205.203
0.036	-83.1163	-207.822
0.0362	-76.5069	-211.875
0.0364	-76.3199	-207.947
0.0366	-80.3728	-206.887
0.0368	-78.6269	-205.577
0.037	-77.1304	-205.203
0.0372	-78.2528	-205.39
0.0374	-78.3152	-201.649
0.0376	-77.1928	-197.16
0.0378	-74.3869	-196.91
0.038	-77.6916	-194.853
0.0382	-77.3175	-197.16
0.0384	-78.1904	-202.397
0.0386	-77.754	-200.34
0.0388	-75.2599	-198.407
0.039	-76.8187	-199.404
0.0392	-73.514	-199.28
0.0394	-78.3152	-199.965
0.0396	-77.0681	-199.155
0.0398	-76.5693	-199.716
0.04	-75.1975	-200.901
0.0402	-78.0657	-202.896
0.0404	-76.694	-206.762
0.0406	-78.0657	-208.196
0.0408	-76.3822	-209.817
0.041	-76.8187	-209.942
0.0412	-79.4998	-210.254
0.0414	-79.2504	-212.685
0.0416	-76.4446	-212.685
0.0418	-79.1881	-210.815
0.042	-75.821	-209.63
0.0422	-78.2528	-208.134
0.0424	-71.8304	-209.568
0.0426	-70.6458	-220.48
0.0428	-75.7587	-232.077
0.043	-79.3751	-237.814
0.0432	-79.1257	-240.807
0.0434	-80.4975	-240.62
0.0436	-81.5575	-243.425
0.0438	-78.3775	-242.116
0.044	-76.4446	-235.569
0.0442	-78.6893	-231.641
0.0444	-76.1951	-231.204
0.0446	-75.9457	-229.084
0.0448	-75.634	-224.657
0.045	-75.634	-223.285
0.0452	-73.9504	-222.35
0.0454	-76.5693	-218.796
0.0456	-72.5163	-216.489
0.0458	-73.9504	-213.122
0.046	-70.8328	-216.489
0.0462	-74.574	-211.688
0.0464	-73.6387	-208.383
0.0466	-74.6987	-207.947
0.0468	-72.8281	-215.491
0.047	-77.2552	-222.6
0.0472	-77.0057	-227.962
0.0474	-78.5022	-229.833
0.0476	-80.6846	-233.948
0.0478	-78.2528	-230.955
0.048	-76.8187	-225.655
0.0482	-75.5716	-226.84
0.0484	-75.4469	-224.47
0.0486	-76.1951	-228.024
0.0488	-78.2528	-224.844
0.049	-75.0104	-229.77
0.0492	-76.3822	-230.705
0.0494	-75.9457	-246.169
0.0496	-76.8187	-256.395
0.0498	-76.1951	-272.17
0.05	-73.4516	-274.539
0.0502	-76.9434	-274.29
0.0504	-80.4975	-271.734
0.0506	-79.6869	-263.752
0.0508	-78.4399	-254.088
0.051	-73.6387	-250.284
0.0512	-74.574	-241.056
0.0514	-75.5716	-233.262
0.0516	-77.6916	-228.461
0.0518	-79.4998	-225.405
0.052	-78.1281	-218.36
0.0522	-76.881	-213.247
0.0524	-76.4446	-208.695
0.0526	-75.1351	-205.328
0.0528	-75.4469	-206.513
0.053	-76.0081	-200.714
0.0532	-76.9434	-202.335
0.0534	-76.3199	-201.337
0.0536	-76.8187	-202.709
0.0538	-76.7563	-206.887
0.054	-73.7634	-207.198
0.0542	-76.9434	-210.753
0.0544	-78.814	-209.817
0.0546	-77.941	-210.565
0.0548	-76.1951	-209.63
0.055	-78.0034	-208.508
0.0552	-77.6293	-206.201
0.0554	-73.2646	-209.256
0.0556	-78.5646	-211.75
0.0558	-76.4446	-217.549
0.056	-75.1975	-220.916
0.0562	-71.5187	-229.645
0.0564	-74.1998	-233.262
0.0566	-74.8857	-235.631
0.0568	-71.8304	-235.257
0.057	-76.3822	-234.26
0.0572	-78.4399	-227.9
0.0574	-78.1904	-222.6
0.0576	-77.6293	-221.041
0.0578	-77.0057	-218.297
0.058	-73.5763	-213.683
0.0582	-76.4446	-214.993
0.0584	-77.4422	-220.043
0.0586	-78.4399	-217.611
0.0588	-75.634	-214.244
0.059	-77.1928	-210.753
0.0592	-75.3222	-209.568
0.0594	-77.0057	-206.637
0.0596	-77.3799	-206.575
0.0598	-76.6316	-205.889
0.06	-78.6893	-204.081
0.0602	-81.5575	-205.141
0.0604	-80.8093	-201.898
0.0606	-81.0587	-198.843
0.0608	-85.9845	-198.594
0.061	-83.9892	-193.169
0.0612	-81.6822	-193.481
0.0614	-82.1187	-198.033
0.0616	-79.4375	-198.718
0.0618	-80.3728	-198.968
0.062	-80.5598	-199.155
0.0622	-76.5069	-199.467
0.0624	-73.7634	-199.155
0.0626	-73.7634	-197.409
0.0628	-77.6916	-196.598
0.063	-79.2504	-200.34
0.0632	-81.4328	-198.594
0.0634	-78.9387	-201.088
0.0636	-78.1904	-202.584
0.0638	-81.7446	-205.328
0.064	-77.1928	-209.942
0.0642	-76.694	-214.993
0.0644	-78.3152	-211.189
0.0646	-77.1304	-213.371
0.0648	-77.5046	-210.69
0.065	-75.7587	-210.316
0.0652	-79.2504	-210.316
0.0654	-73.6387	-206.388
0.0656	-76.5069	-204.642
0.0658	-76.1328	-205.203
0.066	-75.2599	-205.39
0.0662	-74.6987	-200.34
0.0664	-75.6963	-203.021
0.0666	-75.2599	-207.822
0.0668	-76.4446	-220.105
0.067	-76.7563	-231.08
0.0672	-78.5022	-243.8
0.0674	-76.5069	-246.481
0.0676	-79.1257	-248.601
0.0678	-80.1234	-246.294
0.068	-78.814	-238.312
0.0682	-76.881	-235.257
0.0684	-72.3916	-231.703
0.0686	-79.3128	-230.893
0.0688	-75.5093	-227.775
0.069	-78.3152	-226.715
0.0692	-77.5046	-224.345
0.0694	-74.0128	-220.667
0.0696	-77.6293	-219.731
0.0698	-80.3104	-218.609
0.07	-81.994	-214.868
0.0702	-86.6081	-212.997
0.0704	-90.9104	-208.445
0.0706	-92.9681	-206.513
0.0708	-93.9034	-207.136
0.071	-91.5963	-205.951
0.0712	-90.2245	-204.143
0.0714	-90.9728	-202.584
0.0716	-89.8504	-202.584
0.0718	-87.6681	-199.654
0.072	-85.174	-201.275
0.0722	-85.4857	-199.342
0.0724	-80.1234	-201.898
0.0726	-80.6222	-198.968
0.0728	-82.4304	-200.527
0.073	-83.6151	-202.023
0.0732	-85.2363	-200.153
0.0734	-82.3681	-199.342
0.0736	-84.7998	-202.273
0.0738	-82.1187	-201.836
0.074	-77.6293	-199.28
0.0742	-77.6916	-202.085
0.0744	-76.3822	-203.644
0.0746	-74.3869	-205.265
0.0748	-76.5069	-205.078
0.075	-75.2599	-210.565
0.0752	-79.001	-210.628
0.0754	-78.1281	-209.069
0.0756	-80.9963	-211.501
0.0758	-81.1834	-208.944
0.076	-79.1881	-207.635
0.0762	-78.4399	-206.513
0.0764	-78.6269	-208.258
0.0766	-74.4493	-205.702
0.0768	-76.9434	-204.455
0.077	-73.514	-200.09
0.0772	-76.1328	-202.023
0.0774	-73.2646	-197.035
0.0776	-72.5163	-197.534
0.0778	-74.2622	-198.344
0.078	-79.7493	-197.347
0.0782	-75.634	-193.855
0.0784	-73.9504	-196.1
0.0786	-73.9504	-199.965
0.0788	-75.6963	-199.404
0.079	-77.1928	-198.407
0.0792	-78.7516	-200.714
0.0794	-79.8116	-197.284
0.0796	-75.634	-200.215
0.0798	-74.3869	-199.965
0.08	-73.1399	-197.534
0.0802	-75.0104	-198.469
0.0804	-77.5669	-201.524
0.0806	-76.6316	-202.834
0.0808	-77.3799	-204.58
0.081	-73.4516	-205.951
0.0812	-75.7587	-203.52
0.0814	-72.1422	-203.52
0.0816	-73.514	-201.15
0.0818	-75.8834	-199.591
0.082	-77.0057	-199.467
0.0822	-78.6269	-199.591
0.0824	-70.6458	-195.476
0.0826	-72.5163	-195.102
0.0828	-77.1928	-195.913
0.083	-78.4399	-198.531
0.0832	-79.9987	-198.033
0.0834	-79.1257	-199.467
0.0836	-77.8787	-199.716
0.0838	-77.2552	-198.407
0.084	-73.6387	-197.222
0.0842	-73.4516	-194.042
0.0844	-72.1422	-194.977
0.0846	-75.9457	-194.977
0.0848	-75.8834	-194.167
0.085	-76.3199	-194.603
0.0852	-77.0681	-190.176
0.0854	-77.5046	-193.98
0.0856	-75.5093	-192.857
0.0858	-80.5598	-191.111
0.086	-78.6269	-192.857
0.0862	-71.4563	-194.354
0.0864	-73.0152	-193.418
0.0866	-72.2046	-192.982
0.0868	-76.3822	-192.733
0.087	-77.8787	-191.61
0.0872	-77.3799	-192.421
0.0874	-76.5069	-194.541
0.0876	-75.0104	-194.853
0.0878	-75.9457	-191.797
0.088	-77.1304	-188.243
0.0882	-77.2552	-190.051
0.0884	-75.0104	-191.797
0.0886	-78.5646	-199.841
0.0888	-78.5022	-208.944
0.089	-77.3175	-215.865
0.0892	-80.934	-220.667
0.0894	-79.3128	-223.348
0.0896	-74.3869	-226.777
0.0898	-76.3199	-226.403
0.09	-77.754	-222.288
0.0902	-73.9504	-220.48
0.0904	-76.0081	-215.554
0.0906	-71.8304	-216.24
0.0908	-72.8905	-215.367
0.091	-74.6987	-216.115
0.0912	-73.0152	-214.93
0.0914	-76.3822	-216.053
0.0916	-73.7634	-214.494
0.0918	-73.2646	-209.63
0.092	-74.6987	-208.196
0.0922	-75.3222	-208.134
0.0924	-71.581	-206.076
0.0926	-74.4493	-203.644
0.0928	-80.7469	-203.208
0.093	-83.4904	-204.642
0.0932	-80.9963	-207.947
0.0934	-82.6798	-209.256
0.0936	-79.9363	-207.947
0.0938	-72.8281	-206.949
0.094	-74.3869	-210.94
0.0942	-73.7634	-211.438
0.0944	-74.5116	-213.184
0.0946	-75.3846	-213.496
0.0948	-77.1304	-211.563
0.095	-75.2599	-211.189
0.0952	-75.0104	-206.201
0.0954	-75.8834	-206.762
0.0956	-81.2457	-207.136
0.0958	-82.9916	-206.7
0.096	-83.4281	-205.577
0.0962	-82.8046	-199.404
0.0964	-84.8622	-204.205
0.0966	-84.9245	-201.088
0.0968	-80.7469	-201.15
0.097	-79.1257	-200.153
0.0972	-78.1904	-198.718
0.0974	-78.1904	-198.157
0.0976	-81.1834	-198.594
0.0978	-81.7446	-196.661
0.098	-82.9916	-195.913
0.0982	-82.8669	-191.797
0.0984	-82.181	-192.047
0.0986	-79.3128	-191.049
0.0988	-75.1351	-191.797
0.099	-76.6316	-194.354
0.0992	-75.634	-195.414
0.0994	-75.3222	-195.164
0.0996	-75.634	-193.543
0.0998	-79.874	-192.171
0.1	-78.5646	-191.548
0.1002	-78.1904	-195.913
0.1004	-77.2552	-195.227
0.1006	-77.3799	-194.853
0.1008	-77.5669	-194.354
0.101	-78.3152	-191.797
0.1012	-80.4351	-195.601
0.1014	-77.3175	-198.22
0.1016	-76.3822	-198.282
0.1018	-77.6916	-199.529
0.102	-75.5093	-200.589
0.1022	-71.0822	-198.344
0.1024	-75.5093	-195.726
0.1026	-78.3152	-199.591
0.1028	-83.5528	-199.093
0.103	-80.3104	-197.845
0.1032	-84.6751	-193.98
0.1034	-83.8022	-192.358
0.1036	-82.7422	-194.354
0.1038	-82.9916	-193.793
0.104	-78.2528	-191.797
0.1042	-74.8857	-195.04
0.1044	-74.6363	-194.229
0.1046	-73.8881	-192.92
0.1048	-72.7657	-194.291
0.105	-73.3893	-197.347
0.1052	-75.634	-191.548
0.1054	-77.8163	-189.303
0.1056	-76.5693	-189.366
0.1058	-76.3199	-187.744
0.106	-74.574	-189.366
0.1062	-76.3199	-191.922
0.1064	-76.694	-189.366
0.1066	-78.2528	-190.238
0.1068	-79.5622	-193.855
0.107	-74.8234	-194.354
0.1072	-76.0081	-193.231
0.1074	-79.6869	-197.845
0.1076	-78.4399	-201.4
0.1078	-74.1998	-206.325
0.108	-74.5116	-204.954
0.1082	-72.8281	-208.071
0.1084	-74.5116	-214.307
0.1086	-76.3199	-219.108
0.1088	-78.8763	-213.933
0.109	-74.8857	-216.551
0.1092	-74.761	-214.182
0.1094	-74.1998	-215.18
0.1096	-72.8905	-210.877
0.1098	-75.821	-207.573
0.11	-76.5069	-203.956
0.1102	-75.4469	-201.587
0.1104	-74.1998	-200.963
0.1106	-77.8787	-202.21
0.1108	-78.7516	-199.841
0.111	-77.754	-198.095
0.1112	-78.814	-196.224
0.1114	-75.1975	-198.905
0.1116	-71.394	-195.601
0.1118	-78.3152	-190.675
0.112	-77.941	-194.291
0.1122	-74.6987	-195.726
0.1124	-70.0846	-198.157
0.1126	-75.8834	-203.644
0.1128	-80.1857	-206.887
0.113	-77.5046	-212.311
0.1132	-78.1904	-215.554
0.1134	-75.821	-214.12
0.1136	-74.0128	-212.187
0.1138	-77.3799	-209.256
0.114	-77.1304	-206.949
0.1142	-78.0657	-204.33
0.1144	-76.5069	-206.45
0.1146	-79.3128	-203.707
0.1148	-75.3846	-202.085
0.115	-78.0034	-200.153
0.1152	-79.4998	-196.287
0.1154	-75.7587	-198.905
0.1156	-75.3846	-200.028
0.1158	-77.0057	-196.349
0.116	-77.0057	-198.033
0.1162	-72.8281	-199.529
0.1164	-73.9504	-201.711
0.1166	-71.581	-201.15
0.1168	-71.8928	-198.22
0.117	-76.9434	-197.97
0.1172	-77.0057	-199.591
0.1174	-74.761	-198.968
0.1176	-75.1975	-201.025
0.1178	-76.4446	-197.097
0.118	-72.9528	-195.538
0.1182	-74.8234	-195.726
0.1184	-77.1304	-199.903
0.1186	-77.1304	-201.898
0.1188	-77.8787	-204.58
0.119	-74.0751	-202.958
0.1192	-74.574	-202.023
0.1194	-73.2022	-198.594
0.1196	-77.1304	-197.783
0.1198	-78.2528	-199.841
0.12	-78.814	-198.656
0.1202	-78.2528	-196.786
0.1204	-73.4516	-199.965
0.1206	-77.1304	-201.4
0.1208	-79.3751	-200.464
0.121	-77.1928	-199.778
0.1212	-77.8163	-204.081
0.1214	-76.0081	-205.577
0.1216	-79.8116	-203.145
0.1218	-79.001	-203.52
0.122	-75.0728	-202.709
0.1222	-73.7634	-204.393
0.1224	-74.0751	-202.023
0.1226	-75.2599	-197.471
0.1228	-77.8163	-200.963
0.123	-82.4304	-196.037
0.1232	-79.6245	-196.723
0.1234	-79.8116	-195.913
0.1236	-78.3152	-192.982
0.1238	-76.1328	-193.98
0.124	-73.3893	-195.85
0.1242	-74.3246	-194.354
0.1244	-75.0104	-191.984
0.1246	-74.9481	-194.977
0.1248	-72.8905	-192.483
0.125	-77.3175	-195.476
0.1252	-73.514	-195.726
0.1254	-75.8834	-195.975
0.1256	-73.7634	-194.229
0.1258	-77.6293	-193.73
0.126	-78.0657	-192.047
0.1262	-78.5646	-190.55
0.1264	-75.5093	-192.67
0.1266	-74.574	-195.913
0.1268	-77.1928	-192.047
0.127	-75.7587	-194.478
0.1272	-73.4516	-191.797
0.1274	-75.2599	-195.975
0.1276	-74.0751	-192.92
0.1278	-72.7657	-193.231
0.128	-75.3222	-191.984
0.1282	-73.3269	-189.74
0.1284	-75.5093	-191.423
0.1286	-75.7587	-196.661
0.1288	-76.1951	-196.224
0.129	-77.8787	-205.39
0.1292	-74.3869	-212
0.1294	-71.4563	-213.309
0.1296	-76.6316	-221.602
0.1298	-76.2575	-219.607
0.13	-76.2575	-220.417
0.1302	-73.701	-222.6
0.1304	-77.8787	-219.918
0.1306	-80.1857	-218.671
0.1308	-78.0657	-218.422
0.131	-76.9434	-212.436
0.1312	-74.3246	-209.63
0.1314	-75.9457	-208.57
0.1316	-76.881	-204.704
0.1318	-79.8116	-202.647
0.132	-76.4446	-199.841
0.1322	-77.4422	-199.467
0.1324	-69.0246	-202.21
0.1326	-73.2646	-201.213
0.1328	-78.3152	-203.395
0.133	-78.6893	-204.268
0.1332	-79.874	-207.635
0.1334	-78.814	-208.445
0.1336	-76.6316	-204.143
0.1338	-77.5669	-205.016
0.134	-74.8234	-204.268
0.1342	-77.5669	-200.215
0.1344	-73.7634	-200.028
0.1346	-75.5093	-200.215
0.1348	-77.8787	-199.217
0.135	-75.0104	-200.464
0.1352	-77.5669	-200.402
0.1354	-74.3869	-197.471
0.1356	-78.7516	-195.289
0.1358	-78.1281	-197.409
0.136	-77.1304	-196.287
0.1362	-80.7469	-200.901
0.1364	-78.2528	-197.097
0.1366	-76.8187	-195.975
0.1368	-76.3822	-198.095
0.137	-75.8834	-196.474
0.1372	-77.2552	-197.222
0.1374	-73.514	-198.781
0.1376	-75.3222	-193.98
0.1378	-71.7057	-195.164
0.138	-73.701	-188.929
0.1382	-75.7587	-188.617
0.1384	-76.5069	-190.862
0.1386	-73.2646	-193.418
0.1388	-75.3846	-197.721
0.139	-76.0704	-196.1
0.1392	-76.5693	-195.04
0.1394	-72.1422	-193.356
0.1396	-76.0081	-196.1
0.1398	-77.754	-195.164
0.14	-76.694	-196.224
0.1402	-75.2599	-193.231
0.1404	-76.6316	-195.85
0.1406	-74.3869	-195.788
0.1408	-76.0081	-198.968
0.141	-71.4563	-199.342
0.1412	-73.7634	-205.078
0.1414	-73.701	-208.508
0.1416	-76.1951	-211.064
0.1418	-76.8187	-215.055
0.142	-75.4469	-220.417
0.1422	-78.0657	-217.611
0.1424	-70.7704	-220.854
0.1426	-74.2622	-224.907
0.1428	-76.2575	-217.923
0.143	-78.5646	-214.307
0.1432	-80.1857	-208.009
0.1434	-74.6363	-204.268
0.1436	-76.881	-203.956
0.1438	-76.2575	-203.27
0.144	-75.3222	-202.834
0.1442	-73.8881	-199.965
0.1444	-73.2646	-198.22
0.1446	-72.5787	-196.536
0.1448	-74.3246	-197.658
0.145	-71.0199	-194.728
0.1452	-76.1951	-196.598
0.1454	-77.3175	-196.91
0.1456	-75.8834	-198.656
0.1458	-76.4446	-196.1
0.146	-76.0081	-195.663
0.1462	-75.0728	-199.654
0.1464	-77.3175	-198.531
0.1466	-77.6293	-200.714
0.1468	-73.5763	-204.642
0.147	-74.574	-211.251
0.1472	-75.0728	-212.561
0.1474	-75.3222	-215.616
0.1476	-79.9363	-220.417
0.1478	-77.1928	-218.048
0.148	-74.1375	-212.935
0.1482	-73.6387	-207.697
0.1484	-77.0681	-209.318
0.1486	-79.3751	-210.254
0.1488	-75.634	-207.822
0.149	-74.3246	-207.448
0.1492	-72.8281	-208.633
0.1494	-78.9387	-206.014
0.1496	-80.3104	-206.7
0.1498	-85.9845	-203.956
0.15	-93.2175	-201.961
0.1502	-93.5292	-203.145
0.1504	-89.9128	-203.083
0.1506	-92.2198	-203.707
0.1508	-91.6586	-203.27
0.151	-87.7304	-200.589
0.1512	-88.1669	-200.651
0.1514	-81.9316	-201.15
0.1516	-79.9987	-203.582
0.1518	-80.8093	-202.958
0.152	-78.4399	-201.587
0.1522	-75.0104	-199.03
0.1524	-72.7657	-201.649
0.1526	-79.1881	-197.908
0.1528	-84.9869	-200.34
0.153	-80.9963	-202.834
0.1532	-81.994	-202.397
0.1534	-82.3681	-200.651
0.1536	-78.3152	-201.836
0.1538	-79.3128	-199.591
0.154	-79.4375	-195.538
0.1542	-81.4328	-197.721
0.1544	-76.3199	-198.968
0.1546	-75.0104	-200.402
0.1548	-75.7587	-198.22
0.155	-84.6751	-196.848
0.1552	-80.934	-196.162
0.1554	-80.3104	-195.102
0.1556	-77.4422	-195.289
0.1558	-79.5622	-198.157
0.156	-76.5693	-201.836
0.1562	-72.7034	-203.145
0.1564	-80.3728	-207.074
0.1566	-79.874	-206.325
0.1568	-77.8787	-205.078
0.157	-76.881	-204.517
0.1572	-81.3704	-203.956
0.1574	-81.4328	-202.335
0.1576	-81.8069	-200.028
0.1578	-84.4257	-200.215
0.158	-83.7398	-198.282
0.1582	-84.9245	-197.721
0.1584	-81.8069	-201.275
0.1586	-83.1787	-199.841
0.1588	-82.8046	-199.965
0.159	-82.8046	-199.217
0.1592	-78.1904	-197.596
0.1594	-79.5622	-196.162
0.1596	-82.1187	-194.853
0.1598	-81.2457	-194.728
0.16	-77.754	-192.67
0.1602	-76.2575	-193.73
0.1604	-76.1328	-190.488
0.1606	-74.0128	-192.358
0.1608	-75.3846	-191.361
0.161	-77.754	-190.363
0.1612	-74.8857	-197.783
0.1614	-75.634	-193.917
0.1616	-78.2528	-196.848
0.1618	-76.1951	-194.79
0.162	-75.0104	-194.291
0.1622	-72.7034	-190.488
0.1624	-73.2646	-192.92
0.1626	-76.9434	-193.107
0.1628	-82.8046	-189.677
0.163	-88.1669	-190.737
0.1632	-91.5339	-188.867
0.1634	-95.7739	-189.49
0.1636	-96.5222	-192.982
0.1638	-95.7739	-192.67
0.164	-96.0233	-194.853
0.1642	-93.5916	-193.73
0.1644	-88.7281	-195.289
0.1646	-86.7328	-193.668
0.1648	-89.7257	-195.164
0.165	-89.2269	-194.666
0.1652	-90.4739	-195.788
0.1654	-85.9222	-194.354
0.1656	-83.054	-191.548
0.1658	-81.3081	-192.234
0.166	-80.8716	-191.361
0.1662	-81.121	-193.73
0.1664	-78.3152	-195.04
0.1666	-78.3152	-195.538
0.1668	-80.1857	-191.548
0.167	-78.1281	-194.728
0.1672	-75.1351	-195.351
0.1674	-74.8234	-193.855
0.1676	-76.1951	-193.543
0.1678	-72.7657	-192.982
0.168	-76.2575	-190.987
0.1682	-78.6893	-189.615
0.1684	-81.4328	-192.109
0.1686	-79.1257	-196.287
0.1688	-78.814	-195.476
0.169	-79.4998	-190.051
0.1692	-81.3704	-194.416
0.1694	-77.754	-190.924
0.1696	-77.0057	-193.169
0.1698	-78.7516	-194.478
0.17	-77.3175	-193.917
0.1702	-76.2575	-194.042
0.1704	-77.0057	-194.104
0.1706	-79.001	-190.051
0.1708	-80.2481	-193.169
0.171	-81.3704	-191.86
0.1712	-78.3152	-192.857
0.1714	-76.6316	-192.67
0.1716	-74.0128	-193.73
0.1718	-73.701	-191.673
0.172	-75.2599	-191.797
0.1722	-72.454	-192.608
0.1724	-72.0799	-192.733
0.1726	-77.0057	-191.86
0.1728	-90.661	-191.049
0.173	-96.0857	-193.231
0.1732	-101.76	-192.92
0.1734	-98.4551	-194.478
0.1736	-97.6445	-198.594
0.1738	-93.7786	-197.534
0.174	-93.7786	-194.291
0.1742	-94.7139	-194.416
0.1744	-90.2869	-195.476
0.1746	-86.8575	-192.982
0.1748	-83.8022	-192.109
0.175	-77.1304	-193.231
0.1752	-77.6293	-197.97
0.1754	-76.5069	-198.282
0.1756	-75.7587	-196.598
0.1758	-78.0034	-196.973
0.176	-79.4998	-194.167
0.1762	-78.814	-195.289
0.1764	-76.1951	-191.984
0.1766	-72.7657	-191.673
0.1768	-76.5069	-190.488
0.177	-76.2575	-191.423
0.1772	-73.1399	-190.426
0.1774	-74.4493	-189.74
0.1776	-76.1951	-191.548
0.1778	-77.3799	-191.486
0.178	-77.4422	-191.174
0.1782	-77.6293	-191.797
0.1784	-75.3846	-191.673
0.1786	-78.8763	-194.291
0.1788	-76.1328	-197.658
0.179	-82.3681	-198.905
0.1792	-78.1281	-198.594
0.1794	-73.6387	-197.783
0.1796	-78.1904	-192.608
0.1798	-73.6387	-193.606
0.18	-76.694	-192.234
0.1802	-77.6293	-192.296
0.1804	-77.1928	-192.67
0.1806	-74.5116	-195.04
0.1808	-76.2575	-194.478
0.181	-74.0751	-195.102
0.1812	-75.821	-196.661
0.1814	-74.6987	-195.538
0.1816	-76.1951	-196.848
0.1818	-78.1281	-194.104
0.182	-78.0657	-193.418
0.1822	-73.6387	-194.666
0.1824	-72.0175	-193.294
0.1826	-71.2693	-194.354
0.1828	-75.1351	-197.471
0.183	-79.1881	-196.536
0.1832	-78.9387	-197.035
0.1834	-78.5022	-196.411
0.1836	-78.9387	-198.157
0.1838	-78.0034	-198.469
0.184	-77.3799	-194.042
0.1842	-77.5046	-195.227
0.1844	-77.0057	-193.606
0.1846	-74.1375	-193.606
0.1848	-78.8763	-194.977
0.185	-78.2528	-197.721
0.1852	-77.1928	-194.666
0.1854	-73.0152	-193.294
0.1856	-66.4681	-194.291
0.1858	-74.8857	-194.229
0.186	-74.1375	-193.73
0.1862	-74.2622	-197.222
0.1864	-75.7587	-199.155
0.1866	-74.6987	-197.097
0.1868	-78.0657	-195.538
0.187	-76.5069	-195.351
0.1872	-76.6316	-193.98
0.1874	-78.3152	-194.229
0.1876	-79.1257	-193.107
0.1878	-78.6269	-195.289
0.188	-78.1904	-193.481
0.1882	-76.3199	-193.606
0.1884	-73.4516	-194.728
0.1886	-73.6387	-198.968
0.1888	-71.7681	-200.589
0.189	-74.1375	-198.407
0.1892	-74.5116	-196.973
0.1894	-72.9528	-195.663
0.1896	-75.9457	-196.1
0.1898	-76.5069	-195.414
0.19	-77.6916	-194.915
0.1902	-74.2622	-198.033
0.1904	-74.5116	-199.591
0.1906	-75.1975	-201.213
0.1908	-76.6316	-201.213
0.191	-77.0057	-201.275
0.1912	-74.0128	-197.658
0.1914	-75.821	-199.716
0.1916	-74.1998	-202.335
0.1918	-74.4493	-203.27
0.192	-73.3269	-202.896
0.1922	-73.6387	-208.321
0.1924	-73.701	-215.242
0.1926	-75.1351	-216.614
0.1928	-80.1857	-216.801
0.193	-82.3681	-213.122
0.1932	-81.5575	-210.69
0.1934	-77.1928	-207.822
0.1936	-76.4446	-204.205
0.1938	-73.514	-202.023
0.194	-73.9504	-203.831
0.1942	-77.3175	-201.711
0.1944	-76.0081	-204.954
0.1946	-77.0057	-203.894
0.1948	-80.7469	-208.009
0.195	-78.5022	-206.575
0.1952	-79.2504	-208.009
0.1954	-75.5093	-209.256
0.1956	-79.9987	-208.445
0.1958	-77.5669	-209.942
0.196	-76.881	-208.508
0.1962	-76.1328	-208.633
0.1964	-74.761	-207.323
0.1966	-75.0728	-208.009
0.1968	-78.3152	-207.261
0.197	-75.0104	-205.889
0.1972	-75.2599	-206.014
0.1974	-74.9481	-204.018
0.1976	-78.3152	-203.333
0.1978	-76.1951	-201.524
0.198	-76.4446	-198.033
0.1982	-75.2599	-195.102
0.1984	-73.8257	-199.03
0.1986	-76.694	-201.337
0.1988	-76.0704	-201.025
0.199	-75.4469	-201.275
0.1992	-75.2599	-200.34
0.1994	-74.8234	-197.783
0.1996	-77.1928	-196.973
0.1998	-73.7634	-193.107
0.2	-73.4516	-192.109
0.2002	-76.3822	-192.421
0.2004	-77.1928	-193.044
0.2006	-79.9363	-194.728
0.2008	-77.5046	-196.224
0.201	-77.1928	-194.977
0.2012	-76.881	-194.853
0.2014	-77.3175	-195.85
0.2016	-70.0846	-198.469
0.2018	-77.754	-199.841
0.202	-78.4399	-199.155
0.2022	-77.3175	-196.1
0.2024	-72.7034	-193.917
0.2026	-71.2069	-197.16
0.2028	-76.881	-197.347
0.203	-80.3728	-196.536
0.2032	-80.2481	-196.973
0.2034	-79.4998	-195.788
0.2036	-76.9434	-195.538
0.2038	-77.3175	-195.289
0.204	-73.4516	-198.344
0.2042	-74.1375	-196.224
0.2044	-73.3893	-195.975
0.2046	-73.6387	-195.975
0.2048	-77.6293	-193.606
0.205	-79.9363	-194.541
0.2052	-78.6269	-195.289
0.2054	-74.1998	-194.104
0.2056	-79.8116	-196.287
0.2058	-77.1928	-195.289
0.206	-78.1904	-192.358
0.2062	-76.1328	-195.289
0.2064	-76.4446	-197.097
0.2066	-81.3081	-195.04
0.2068	-78.9387	-188.617
0.207	-74.5116	-192.234
0.2072	-75.0104	-194.104
0.2074	-78.8763	-195.164
0.2076	-76.694	-192.546
0.2078	-78.0657	-191.735
0.208	-77.3799	-194.853
0.2082	-78.3775	-194.167
0.2084	-75.1975	-192.92
0.2086	-76.5069	-196.848
0.2088	-77.0057	-199.529
0.209	-73.5763	-202.584
0.2092	-75.3222	-201.337
0.2094	-71.8928	-199.903
0.2096	-75.9457	-199.28
0.2098	-76.4446	-201.213
0.21	-80.6222	-198.968
0.2102	-77.3799	-196.973
0.2104	-73.3269	-194.977
0.2106	-76.0081	-195.289
0.2108	-74.8857	-197.596
0.211	-77.8787	-196.287
0.2112	-77.0057	-194.541
0.2114	-77.5046	-193.231
0.2116	-73.7634	-194.603
0.2118	-73.6387	-193.169
0.212	-72.5163	-192.982
0.2122	-71.2693	-195.476
0.2124	-69.7104	-196.723
0.2126	-78.6893	-192.483
0.2128	-78.1904	-191.735
0.213	-73.701	-189.864
0.2132	-79.3128	-188.118
0.2134	-75.6963	-190.301
0.2136	-77.1928	-190.363
0.2138	-75.6963	-188.742
0.214	-74.2622	-188.617
0.2142	-73.0152	-190.987
0.2144	-77.1928	-191.984
0.2146	-75.6963	-192.857
0.2148	-72.641	-191.298
0.215	-74.8234	-193.169
0.2152	-74.3246	-192.047
0.2154	-73.2022	-190.051
0.2156	-74.4493	-193.356
0.2158	-79.3751	-195.102
0.216	-79.7493	-196.973
0.2162	-80.3104	-199.404
0.2164	-76.881	-193.98
0.2166	-73.701	-192.296
0.2168	-74.761	-193.917
0.217	-76.0081	-193.855
0.2172	-76.8187	-193.231
0.2174	-76.5069	-193.606
0.2176	-78.7516	-195.04
0.2178	-75.8834	-196.1
0.218	-74.4493	-195.85
0.2182	-78.5646	-194.977
0.2184	-79.0634	-194.977
0.2186	-79.001	-197.845
0.2188	-78.1281	-194.416
0.219	-76.8187	-196.037
0.2192	-75.3846	-195.227
0.2194	-73.6387	-194.915
0.2196	-76.8187	-192.546
0.2198	-76.1328	-192.608
0.22	-73.514	-192.982
0.2202	-73.0152	-196.162
0.2204	-77.0057	-194.416
0.2206	-73.514	-193.294
0.2208	-74.8234	-194.416
0.221	-76.0081	-194.291
0.2212	-76.3822	-192.234
0.2214	-78.9387	-191.797
0.2216	-74.574	-194.416
0.2218	-79.4375	-197.284
0.222	-76.5069	-195.351
0.2222	-75.0104	-193.855
0.2224	-70.8952	-191.049
0.2226	-76.8187	-188.929
0.2228	-78.1904	-191.673
0.223	-77.6293	-190.488
0.2232	-80.934	-194.853
0.2234	-84.7998	-194.416
0.2236	-78.1904	-193.294
0.2238	-76.8187	-192.171
0.224	-75.2599	-190.426
0.2242	-74.6363	-191.61
0.2244	-72.9528	-193.231
0.2246	-76.881	-197.222
0.2248	-75.634	-195.601
0.225	-75.5716	-196.224
0.2252	-74.4493	-195.601
0.2254	-73.701	-195.289
0.2256	-73.514	-193.668
0.2258	-72.7657	-191.922
0.226	-76.4446	-193.294
0.2262	-77.6293	-194.042
0.2264	-79.6869	-193.793
0.2266	-79.1881	-193.481
0.2268	-77.6916	-191.922
0.227	-80.4351	-195.04
0.2272	-80.6222	-196.349
0.2274	-73.6387	-191.236
0.2276	-74.1375	-195.04
0.2278	-75.3846	-196.91
0.228	-79.001	-198.968
0.2282	-76.6316	-200.901
0.2284	-78.0657	-201.711
0.2286	-77.754	-206.513
0.2288	-72.5163	-207.136
0.229	-75.1975	-207.011
0.2292	-73.8881	-207.385
0.2294	-76.881	-203.395
0.2296	-77.5669	-203.145
0.2298	-75.1351	-201.275
0.23	-75.5716	-200.838
0.2302	-74.3869	-202.085
0.2304	-77.941	-199.217
0.2306	-74.8234	-194.79
0.2308	-73.3893	-195.164
0.231	-75.5093	-197.534
0.2312	-77.941	-196.1
0.2314	-74.1375	-196.661
0.2316	-74.574	-194.541
0.2318	-72.8281	-196.536
0.232	-74.3869	-192.67
0.2322	-69.0869	-194.291
0.2324	-67.8399	-188.68
0.2326	-73.2646	-194.728
0.2328	-76.8187	-197.035
0.233	-78.0034	-197.284
0.2332	-76.5693	-197.721
0.2334	-75.8834	-198.718
0.2336	-75.7587	-201.898
0.2338	-74.1998	-204.954
0.234	-75.3222	-204.891
0.2342	-78.6269	-206.7
0.2344	-74.574	-207.573
0.2346	-76.3199	-203.956
0.2348	-78.6893	-204.517
0.235	-77.4422	-204.58
0.2352	-75.6963	-203.145
0.2354	-74.3869	-200.838
0.2356	-73.0152	-199.093
0.2358	-73.3893	-200.028
0.236	-76.0081	-200.09
0.2362	-73.9504	-200.402
0.2364	-74.8234	-198.095
0.2366	-75.1351	-201.649
0.2368	-77.6916	-206.138
0.237	-75.634	-210.503
0.2372	-77.6293	-215.491
0.2374	-77.1304	-219.731
0.2376	-73.8257	-219.918
0.2378	-75.2599	-218.547
0.238	-77.941	-216.427
0.2382	-79.3751	-215.554
0.2384	-80.4975	-213.933
0.2386	-74.2622	-216.801
0.2388	-77.4422	-213.808
0.239	-74.0128	-211.189
0.2392	-72.641	-208.321
0.2394	-73.8257	-206.637
0.2396	-74.574	-200.589
0.2398	-78.3152	-202.709
0.24	-79.001	-202.584
0.2402	-80.3728	-201.898
0.2404	-78.3152	-198.282
0.2406	-79.6245	-195.102
0.2408	-78.2528	-192.546
0.241	-76.0081	-193.793
0.2412	-77.8163	-194.915
0.2414	-80.6846	-196.973
0.2416	-74.1998	-197.783
0.2418	-78.5022	-195.476
0.242	-75.821	-196.287
0.2422	-72.641	-195.414
0.2424	-72.7657	-193.73
0.2426	-78.6893	-196.411
0.2428	-78.1904	-196.349
0.243	-79.1257	-199.965
0.2432	-78.5022	-201.337
0.2434	-79.2504	-195.476
0.2436	-81.2457	-192.171
0.2438	-75.9457	-191.984
0.244	-79.001	-191.049
0.2442	-75.5093	-189.74
0.2444	-74.9481	-193.917
0.2446	-75.5093	-193.294
0.2448	-76.9434	-195.788
0.245	-79.8116	-192.857
0.2452	-78.8763	-192.608
0.2454	-79.8116	-192.608
0.2456	-78.6269	-191.922
0.2458	-76.0704	-192.358
0.246	-74.2622	-188.181
0.2462	-76.8187	-193.107
0.2464	-77.754	-192.109
0.2466	-79.3751	-195.04
0.2468	-76.3199	-195.102
0.247	-74.3869	-196.1
0.2472	-76.6316	-194.167
0.2474	-75.634	-194.042
0.2476	-76.7563	-197.534
0.2478	-75.7587	-195.476
0.248	-73.7634	-193.668
0.2482	-74.6363	-192.857
0.2484	-72.8281	-193.044
0.2486	-77.0057	-192.047
0.2488	-71.7681	-194.042
0.249	-72.8905	-196.037
0.2492	-74.1375	-201.213
0.2494	-78.5022	-201.711
0.2496	-75.4469	-203.27
0.2498	-75.1975	-199.467
0.25	-76.3822	-199.841
0.2502	-77.941	-200.714
0.2504	-77.6916	-201.961
0.2506	-72.5787	-200.901
0.2508	-75.1351	-199.093
0.251	-74.2622	-195.351
0.2512	-79.6869	-193.356
0.2514	-76.881	-192.421
0.2516	-72.8281	-194.666
0.2518	-74.4493	-193.169
0.252	-76.2575	-194.167
0.2522	-68.1516	-193.917
0.2524	-69.0246	-196.411
0.2526	-73.6387	-194.167
0.2528	-76.8187	-190.613
0.253	-78.9387	-192.234
0.2532	-76.5069	-192.546
0.2534	-74.761	-195.476
0.2536	-75.2599	-190.613
0.2538	-76.3199	-190.924
0.254	-77.3175	-189.553
0.2542	-72.8281	-190.176
0.2544	-71.5187	-190.301
0.2546	-74.5116	-190.238
0.2548	-75.8834	-190.051
0.255	-73.4516	-189.553
0.2552	-72.3293	-192.296
0.2554	-77.6293	-193.169
0.2556	-75.5716	-191.361
0.2558	-77.6293	-197.16
0.256	-75.634	-196.1
0.2562	-75.634	-197.16
0.2564	-74.761	-193.356
0.2566	-75.3222	-193.231
0.2568	-71.9552	-193.356
0.257	-75.1975	-194.416
0.2572	-74.5116	-192.546
0.2574	-77.5669	-190.238
0.2576	-75.8834	-188.617
0.2578	-74.9481	-193.481
0.258	-78.0034	-192.795
0.2582	-78.4399	-188.118
0.2584	-78.7516	-191.797
0.2586	-77.941	-194.104
0.2588	-76.1328	-199.093
0.259	-76.4446	-197.908
0.2592	-73.3269	-195.351
0.2594	-77.0057	-194.541
0.2596	-72.7034	-194.728
0.2598	-75.5716	-192.982
0.26	-78.0034	-190.363
0.2602	-76.1951	-192.234
0.2604	-74.9481	-190.987
0.2606	-76.0081	-191.735
0.2608	-70.8328	-193.356
0.261	-71.394	-193.543
0.2612	-72.454	-193.668
0.2614	-76.1951	-194.104
0.2616	-76.1328	-195.538
0.2618	-75.8834	-195.975
0.262	-74.0128	-195.476
0.2622	-71.0199	-199.591
0.2624	-70.8952	-200.028
0.2626	-75.634	-198.157
0.2628	-78.5022	-195.227
0.263	-78.0034	-196.848
0.2632	-77.5046	-197.658
0.2634	-77.1928	-195.227
0.2636	-75.634	-199.903
0.2638	-74.8234	-203.956
0.264	-73.9504	-203.52
0.2642	-76.8187	-204.205
0.2644	-76.1951	-201.025
0.2646	-80.9963	-200.714
0.2648	-77.5669	-200.651
0.265	-76.881	-201.4
0.2652	-76.1328	-199.28
0.2654	-79.9363	-199.467
0.2656	-76.0081	-200.34
0.2658	-78.1281	-196.1
0.266	-76.3822	-200.215
0.2662	-75.821	-199.529
0.2664	-76.2575	-200.527
0.2666	-72.8905	-197.097
0.2668	-73.701	-192.483
0.267	-73.514	-193.294
0.2672	-75.0104	-196.536
0.2674	-74.3246	-195.102
0.2676	-75.7587	-198.407
0.2678	-75.2599	-193.481
0.268	-71.6434	-194.666
0.2682	-74.1998	-189.116
0.2684	-75.9457	-187.931
0.2686	-75.1975	-190.363
0.2688	-73.9504	-196.411
0.269	-76.1328	-196.848
0.2692	-74.4493	-198.905
0.2694	-74.761	-196.349
0.2696	-73.7634	-198.157
0.2698	-75.3222	-198.157
0.27	-72.0175	-198.531
0.2702	-77.3799	-200.651
0.2704	-73.8881	-199.591
0.2706	-75.8834	-202.023
0.2708	-78.1904	-202.085
0.271	-77.2552	-201.524
0.2712	-73.4516	-201.587
0.2714	-73.7634	-202.522
0.2716	-74.1375	-201.462
0.2718	-72.7657	-199.716
0.272	-75.0104	-197.596
0.2722	-71.0822	-196.786
0.2724	-74.9481	-198.344
0.2726	-78.6269	-201.088
0.2728	-79.4375	-197.035
0.273	-80.8093	-195.102
0.2732	-78.7516	-195.04
0.2734	-80.3104	-200.402
0.2736	-75.3222	-197.222
0.2738	-77.8787	-193.356
0.274	-76.0081	-197.222
0.2742	-76.4446	-197.035
0.2744	-78.814	-192.982
0.2746	-79.874	-197.845
0.2748	-79.2504	-196.598
0.275	-77.754	-196.474
0.2752	-76.3199	-195.913
0.2754	-78.8763	-195.913
0.2756	-80.6222	-194.478
0.2758	-78.6893	-198.033
0.276	-79.1257	-194.354
0.2762	-77.8787	-194.666
0.2764	-71.8928	-197.534
0.2766	-74.2622	-196.723
0.2768	-73.0152	-193.418
0.277	-72.2669	-192.171
0.2772	-79.7493	-193.543
0.2774	-77.4422	-196.848
0.2776	-78.1281	-198.282
0.2778	-78.8763	-197.596
0.278	-77.5669	-193.98
0.2782	-75.0728	-190.862
0.2784	-71.7057	-196.224
0.2786	-73.9504	-197.721
0.2788	-73.5763	-198.968
0.279	-73.2646	-198.531
0.2792	-70.8952	-196.91
0.2794	-76.0704	-191.673
0.2796	-83.1787	-193.606
0.2798	-78.4399	-194.354
0.28	-77.6293	-195.476
0.2802	-75.5093	-195.164
0.2804	-75.9457	-194.229
0.2806	-75.3222	-192.857
0.2808	-74.9481	-192.982
0.281	-73.3893	-190.675
0.2812	-76.4446	-191.735
0.2814	-79.2504	-194.478
0.2816	-82.5551	-192.857
0.2818	-78.1904	-195.85
0.282	-73.8881	-202.896
0.2822	-76.1951	-203.52
0.2824	-71.2069	-202.46
0.2826	-73.2022	-201.213
0.2828	-74.2622	-201.836
0.283	-78.5022	-202.522
0.2832	-81.121	-199.217
0.2834	-80.4351	-201.649
0.2836	-83.3657	-198.718
0.2838	-84.1763	-199.093
0.284	-81.8692	-193.668
0.2842	-81.3081	-195.85
0.2844	-82.7422	-196.848
0.2846	-82.8669	-197.16
0.2848	-77.6293	-195.289
0.285	-75.5716	-193.668
0.2852	-78.5022	-194.666
0.2854	-80.5598	-196.536
0.2856	-76.8187	-198.282
0.2858	-78.7516	-201.213
0.286	-77.2552	-203.083
0.2862	-79.9987	-206.45
0.2864	-79.3128	-209.318
0.2866	-80.4351	-211.189
0.2868	-76.8187	-211.438
0.287	-76.4446	-209.942
0.2872	-76.694	-208.757
0.2874	-77.0057	-204.954
0.2876	-75.2599	-202.584
0.2878	-77.3175	-203.021
0.288	-76.881	-198.968
0.2882	-77.8163	-194.167
0.2884	-74.574	-193.98
0.2886	-75.0104	-196.973
0.2888	-76.8187	-194.291
0.289	-77.0057	-194.666
0.2892	-74.8234	-194.291
0.2894	-74.8234	-194.728
0.2896	-76.6316	-198.594
0.2898	-75.9457	-196.474
0.29	-72.5787	-198.095
0.2902	-74.6363	-198.531
0.2904	-73.3893	-198.531
0.2906	-72.2669	-201.213
0.2908	-75.5716	-200.34
0.291	-75.5716	-196.973
0.2912	-77.6293	-198.22
0.2914	-76.5069	-198.282
0.2916	-75.6963	-199.591
0.2918	-78.9387	-198.282
0.292	-75.3846	-197.097
0.2922	-77.1928	-195.102
0.2924	-74.761	-195.351
0.2926	-78.1904	-196.598
0.2928	-78.4399	-196.1
0.293	-79.3751	-196.661
0.2932	-77.8787	-196.411
0.2934	-78.8763	-198.407
0.2936	-79.2504	-194.728
0.2938	-76.0704	-194.478
0.294	-82.9916	-191.735
0.2942	-79.001	-193.98
0.2944	-76.5693	-195.913
0.2946	-79.7493	-194.042
0.2948	-78.5022	-199.841
0.295	-78.3152	-197.97
0.2952	-77.1304	-198.594
0.2954	-74.4493	-195.476
0.2956	-73.8881	-197.658
0.2958	-74.3869	-198.157
0.296	-74.5116	-193.606
0.2962	-74.761	-199.03
0.2964	-77.8787	-195.476
0.2966	-76.2575	-196.723
0.2968	-76.2575	-196.474
0.297	-77.941	-197.471
0.2972	-76.1328	-196.536
0.2974	-75.8834	-200.153
0.2976	-78.814	-200.09
0.2978	-79.4998	-199.28
0.298	-79.2504	-199.093
0.2982	-76.9434	-200.215
0.2984	-77.0681	-206.637
0.2986	-75.7587	-212
0.2988	-79.4375	-213.621
0.299	-77.6293	-213.621
0.2992	-79.6245	-214.805
0.2994	-75.8834	-210.877
0.2996	-76.8187	-207.011
0.2998	-76.5069	-207.448
0.3	-79.3128	-202.21
0.3002	-76.1328	-203.021
0.3004	-77.0057	-203.52
0.3006	-75.821	-206.388
0.3008	-74.3869	-204.143
0.301	-75.9457	-199.965
0.3012	-79.4998	-196.91
0.3014	-78.6269	-195.227
0.3016	-77.754	-193.481
0.3018	-74.6987	-194.915
0.302	-73.3269	-195.663
0.3022	-74.5116	-197.097
0.3024	-73.0152	-197.534
0.3026	-81.4951	-196.162
0.3028	-79.4375	-198.033
0.303	-77.2552	-196.349
0.3032	-80.6846	-192.483
0.3034	-78.5022	-195.351
0.3036	-78.3152	-195.476
0.3038	-75.3222	-197.035
0.304	-72.9528	-199.217
0.3042	-73.514	-198.469
0.3044	-75.4469	-195.913
0.3046	-76.8187	-197.097
0.3048	-73.3893	-195.414
0.305	-74.9481	-196.973
0.3052	-72.641	-196.474
0.3054	-74.9481	-191.361
0.3056	-78.3775	-192.296
0.3058	-76.881	-192.546
0.306	-81.121	-192.733
0.3062	-77.6293	-192.483
0.3064	-74.1375	-193.73
0.3066	-74.5116	-195.289
0.3068	-74.6363	-198.282
0.307	-77.0057	-198.095
0.3072	-75.2599	-195.663
0.3074	-76.1951	-195.476
0.3076	-76.4446	-194.042
0.3078	-76.8187	-195.351
0.308	-78.6269	-190.924
0.3082	-74.3869	-189.303
0.3084	-73.5763	-190.426
0.3086	-74.3246	-193.044
0.3088	-75.5093	-196.91
0.309	-76.8187	-196.349
0.3092	-73.1399	-195.726
0.3094	-73.8257	-197.284
0.3096	-75.0104	-198.968
0.3098	-71.4563	-198.033
0.31	-72.3293	-195.04
0.3102	-73.3893	-193.917
0.3104	-74.9481	-192.421
0.3106	-80.4975	-196.536
0.3108	-77.3799	-194.915
0.311	-77.754	-192.047
0.3112	-80.8716	-193.231
0.3114	-76.881	-193.294
0.3116	-75.4469	-194.603
0.3118	-76.5069	-197.284
0.312	-73.8257	-197.222
0.3122	-72.5787	-193.543
0.3124	-76.881	-191.61
0.3126	-76.3199	-192.546
0.3128	-76.8187	-195.538
0.313	-79.0634	-198.22
0.3132	-81.121	-195.601
0.3134	-78.2528	-195.476
0.3136	-73.3893	-195.726
0.3138	-74.761	-196.723
0.314	-75.0104	-193.855
0.3142	-79.6869	-195.289
0.3144	-80.8093	-197.596
0.3146	-75.9457	-199.591
0.3148	-80.6846	-203.083
0.315	-77.754	-200.838
0.3152	-72.3293	-204.268
0.3154	-71.8304	-204.954
0.3156	-73.5763	-201.213
0.3158	-76.5693	-201.836
0.316	-75.0728	-202.148
0.3162	-76.694	-200.714
0.3164	-75.1975	-200.34
0.3166	-73.0152	-201.4
0.3168	-71.7057	-197.409
0.317	-72.3293	-201.524
0.3172	-75.4469	-203.52
0.3174	-69.7104	-203.457
0.3176	-74.0751	-201.587
0.3178	-73.9504	-199.778
0.318	-72.9528	-200.277
0.3182	-71.7681	-196.848
0.3184	-73.1399	-194.104
0.3186	-74.5116	-195.102
0.3188	-76.3822	-197.596
0.319	-75.634	-195.476
0.3192	-73.2022	-196.723
0.3194	-76.3199	-194.416
0.3196	-75.0104	-195.227
0.3198	-76.6316	-198.033
0.32	-77.3175	-198.22
0.3202	-77.2552	-197.347
0.3204	-73.8881	-195.04
0.3206	-76.3199	-195.975
0.3208	-74.574	-195.538
0.321	-76.1951	-194.977
0.3212	-77.8787	-193.418
0.3214	-78.9387	-194.603
0.3216	-75.5716	-190.613
0.3218	-74.574	-196.474
0.322	-73.9504	-193.543
0.3222	-70.7081	-192.608
0.3224	-69.3987	-192.982
0.3226	-75.5716	-191.86
0.3228	-75.3846	-193.481
0.323	-77.6293	-197.471
0.3232	-79.7493	-199.591
0.3234	-79.4375	-197.721
0.3236	-76.5069	-194.354
0.3238	-73.5763	-198.469
0.324	-75.3222	-196.411
0.3242	-75.4469	-197.409
0.3244	-80.3104	-196.037
0.3246	-79.1881	-191.86
0.3248	-78.3775	-193.917
0.325	-78.814	-195.102
0.3252	-77.1928	-198.22
0.3254	-73.1399	-196.723
0.3256	-77.0057	-194.853
0.3258	-79.9987	-191.174
0.326	-77.6916	-192.857
0.3262	-78.9387	-193.73
0.3264	-76.6316	-193.73
0.3266	-77.5669	-193.668
0.3268	-73.6387	-195.102
0.327	-76.694	-194.354
0.3272	-75.8834	-196.287
0.3274	-75.821	-198.531
0.3276	-74.8857	-199.591
0.3278	-79.6245	-197.409
0.328	-79.9987	-193.793
0.3282	-80.3728	-188.368
0.3284	-78.9387	-191.236
0.3286	-74.6363	-193.73
0.3288	-75.4469	-195.538
0.329	-79.4998	-196.411
0.3292	-73.8881	-197.347
0.3294	-79.1881	-197.409
0.3296	-76.0081	-195.164
0.3298	-79.4375	-194.354
0.33	-76.9434	-194.354
0.3302	-79.3128	-192.92
0.3304	-77.4422	-192.546
0.3306	-73.514	-193.107
0.3308	-75.6963	-191.236
0.331	-73.0152	-188.68
0.3312	-74.0751	-192.67
0.3314	-75.1975	-193.418
0.3316	-73.514	-195.04
0.3318	-72.5163	-195.414
0.332	-73.2022	-194.666
0.3322	-72.5163	-195.04
0.3324	-76.3199	-196.1
0.3326	-82.3057	-197.409
0.3328	-79.9363	-194.042
0.333	-78.2528	-196.723
0.3332	-78.3775	-193.231
0.3334	-75.8834	-197.16
0.3336	-79.1257	-195.476
0.3338	-75.0104	-198.718
0.334	-72.454	-196.411
0.3342	-72.3293	-195.913
0.3344	-73.8257	-196.349
0.3346	-75.821	-196.162
0.3348	-77.8163	-196.224
0.335	-77.1928	-197.347
0.3352	-76.2575	-201.088
0.3354	-77.8787	-200.153
0.3356	-80.5598	-195.663
0.3358	-78.6269	-193.668
0.336	-73.9504	-197.534
0.3362	-76.7563	-195.85
0.3364	-81.0587	-195.726
0.3366	-76.7563	-196.474
0.3368	-74.574	-194.853
0.337	-77.3175	-194.603
0.3372	-77.6293	-194.478
0.3374	-79.001	-193.107
0.3376	-77.754	-196.536
0.3378	-77.0057	-197.347
0.338	-76.1328	-191.423
0.3382	-76.7563	-186.123
0.3384	-78.8763	-184.751
0.3386	-75.1975	-189.74
0.3388	-78.0034	-194.728
0.339	-78.9387	-193.044
0.3392	-78.9387	-194.354
0.3394	-79.1881	-194.291
0.3396	-81.5575	-191.298
0.3398	-79.5622	-191.174
0.34	-75.4469	-191.111
0.3402	-73.514	-190.675
0.3404	-74.9481	-194.728
0.3406	-75.5093	-195.102
0.3408	-73.2646	-194.229
0.341	-74.574	-194.541
0.3412	-77.1304	-193.418
0.3414	-77.6293	-193.481
0.3416	-80.6222	-194.541
0.3418	-80.1857	-194.229
0.342	-77.6916	-198.843
0.3422	-72.5163	-196.1
0.3424	-75.5716	-200.215
0.3426	-78.814	-203.395
0.3428	-82.6798	-206.014
0.343	-83.1163	-211.376
0.3432	-77.754	-213.06
0.3434	-74.4493	-214.244
0.3436	-72.7657	-215.491
0.3438	-75.1351	-212.498
0.344	-75.6963	-210.441
0.3442	-74.3869	-207.51
0.3444	-79.001	-205.889
0.3446	-78.5022	-201.025
0.3448	-75.3222	-201.025
0.345	-80.1234	-199.03
0.3452	-76.5693	-196.723
0.3454	-73.701	-196.1
0.3456	-72.2669	-198.407
0.3458	-74.4493	-198.157
0.346	-77.5669	-204.704
0.3462	-73.514	-206.887
0.3464	-78.5022	-212.436
0.3466	-77.8163	-216.364
0.3468	-76.9434	-215.491
0.347	-73.4516	-214.868
0.3472	-72.7034	-221.29
0.3474	-76.3822	-227.027
0.3476	-79.3128	-229.271
0.3478	-76.4446	-229.645
0.348	-78.9387	-226.84
0.3482	-76.6316	-220.916
0.3484	-79.6869	-215.616
0.3486	-78.1281	-211.314
0.3488	-71.3316	-209.942
0.349	-74.4493	-207.884
0.3492	-74.574	-204.517
0.3494	-77.3175	-204.205
0.3496	-80.7469	-201.587
0.3498	-80.3728	-197.97
0.35	-79.0634	-197.222
0.3502	-77.0681	-195.538
0.3504	-75.9457	-192.982
0.3506	-73.9504	-192.421
0.3508	-73.3893	-195.289
0.351	-75.3846	-191.922
0.3512	-74.8234	-193.294
0.3514	-73.701	-194.229
0.3516	-76.0081	-195.289
0.3518	-75.3222	-196.162
0.352	-70.9575	-192.421
0.3522	-72.0175	-192.296
0.3524	-74.1998	-193.73
0.3526	-80.4975	-194.291
0.3528	-84.301	-195.289
0.353	-81.8069	-191.236
0.3532	-84.114	-191.174
0.3534	-80.3728	-193.668
0.3536	-77.6293	-194.416
0.3538	-76.3822	-194.666
0.354	-72.5787	-193.107
0.3542	-73.701	-193.73
0.3544	-75.634	-195.164
0.3546	-81.3081	-190.363
0.3548	-77.8163	-195.164
0.355	-75.3846	-194.291
0.3552	-76.0704	-193.668
0.3554	-74.761	-192.421
0.3556	-77.0057	-192.857
0.3558	-75.9457	-194.042
0.356	-72.0175	-197.347
0.3562	-76.4446	-195.663
0.3564	-73.701	-196.598
0.3566	-73.701	-192.795
0.3568	-77.2552	-193.418
0.357	-76.4446	-191.174
0.3572	-74.4493	-194.104
0.3574	-78.8763	-193.98
0.3576	-79.1257	-192.92
0.3578	-77.0057	-194.977
0.358	-74.1998	-198.469
0.3582	-77.3175	-197.471
0.3584	-76.3822	-195.85
0.3586	-77.941	-197.222
0.3588	-76.1951	-199.404
0.359	-76.7563	-196.1
0.3592	-78.1281	-198.033
0.3594	-77.5669	-197.409
0.3596	-71.3316	-194.354
0.3598	-74.1998	-193.294
0.36	-76.6316	-189.241
0.3602	-78.5646	-193.543
0.3604	-78.3775	-196.037
0.3606	-77.2552	-195.289
0.3608	-76.8187	-196.1
0.361	-73.514	-192.857
0.3612	-74.6363	-189.178
0.3614	-76.0081	-193.356
0.3616	-76.2575	-196.349
0.3618	-73.701	-194.167
0.362	-75.634	-193.917
0.3622	-71.4563	-195.102
0.3624	-73.6387	-194.728
0.3626	-80.3728	-197.347
0.3628	-80.8716	-198.469
0.363	-74.8857	-199.217
0.3632	-73.701	-196.474
0.3634	-75.1975	-193.418
0.3636	-73.4516	-196.037
0.3638	-74.6363	-196.349
0.364	-70.6458	-194.977
0.3642	-74.5116	-193.294
0.3644	-75.9457	-192.483
0.3646	-75.9457	-193.917
0.3648	-74.4493	-192.109
0.365	-71.8928	-192.109
0.3652	-71.4563	-190.363
0.3654	-71.8928	-192.857
0.3656	-72.7034	-194.728
0.3658	-74.5116	-202.273
0.366	-75.634	-209.256
0.3662	-78.0034	-215.741
0.3664	-71.581	-219.607
0.3666	-76.0704	-222.225
0.3668	-74.2622	-221.041
0.367	-77.6916	-218.609
0.3672	-78.1281	-218.547
0.3674	-76.694	-215.678
0.3676	-74.5116	-213.558
0.3678	-73.4516	-209.256
0.368	-71.8928	-201.774
0.3682	-76.6316	-199.28
0.3684	-75.1351	-197.471
0.3686	-72.5787	-204.143
0.3688	-75.5716	-204.33
0.369	-76.0081	-201.898
0.3692	-76.0081	-202.584
0.3694	-75.9457	-199.529
0.3696	-75.1975	-201.587
0.3698	-77.941	-201.462
0.37	-77.2552	-197.409
0.3702	-73.6387	-197.845
0.3704	-74.6363	-196.598
0.3706	-76.2575	-197.721
0.3708	-74.6363	-198.905
0.371	-70.3963	-196.723
0.3712	-73.8881	-196.661
0.3714	-76.9434	-194.167
0.3716	-75.5716	-194.666
0.3718	-74.5116	-196.474
0.372	-71.581	-194.977
0.3722	-68.5258	-198.22
0.3724	-73.0152	-197.409
0.3726	-75.0104	-197.721
0.3728	-81.121	-195.164
0.373	-79.001	-195.538
0.3732	-80.3728	-196.411
0.3734	-77.5669	-195.726
0.3736	-78.0657	-195.726
0.3738	-77.0681	-196.037
0.374	-75.2599	-200.651
0.3742	-73.8881	-201.213
0.3744	-72.7657	-200.838
0.3746	-75.6963	-202.397
0.3748	-79.5622	-199.903
0.375	-78.9387	-197.721
0.3752	-73.8257	-191.049
0.3754	-75.2599	-194.104
0.3756	-77.3175	-193.668
0.3758	-75.5716	-193.917
0.376	-74.5116	-198.718
0.3762	-75.634	-200.838
0.3764	-74.8857	-206.076
0.3766	-77.1304	-208.009
0.3768	-76.4446	-206.263
0.377	-79.3128	-206.388
0.3772	-76.3199	-204.517
0.3774	-77.1304	-209.131
0.3776	-77.6916	-205.453
0.3778	-78.5646	-202.771
0.378	-77.4422	-202.709
0.3782	-77.754	-199.591
0.3784	-75.821	-200.153
0.3786	-74.1375	-200.589
0.3788	-76.3199	-201.587
0.379	-77.8787	-199.28
0.3792	-74.8857	-199.965
0.3794	-76.1951	-196.536
0.3796	-74.0751	-198.033
0.3798	-78.9387	-196.1
0.38	-74.8234	-195.601
0.3802	-76.6316	-192.733
0.3804	-76.5069	-192.483
0.3806	-74.2622	-193.418
0.3808	-73.3269	-191.797
0.381	-74.0751	-192.483
0.3812	-79.3128	-190.114
0.3814	-79.4375	-191.236
0.3816	-79.4375	-196.037
0.3818	-77.8787	-194.915
0.382	-75.0104	-199.093
0.3822	-73.8881	-199.654
0.3824	-77.0057	-202.522
0.3826	-78.814	-202.148
0.3828	-81.3704	-201.088
0.383	-83.241	-198.344
0.3832	-82.181	-197.908
0.3834	-81.2457	-196.349
0.3836	-81.4328	-191.361
0.3838	-78.814	-194.167
0.384	-74.3869	-192.608
0.3842	-77.754	-196.661
0.3844	-75.6963	-195.102
0.3846	-74.0128	-195.663
0.3848	-72.454	-195.601
0.385	-72.9528	-194.977
0.3852	-73.2022	-198.656
0.3854	-76.1951	-199.03
0.3856	-78.6893	-201.649
0.3858	-73.9504	-198.282
0.386	-74.574	-194.042
0.3862	-72.641	-194.104
0.3864	-74.8857	-197.347
0.3866	-75.2599	-198.469
0.3868	-76.0081	-201.213
0.387	-76.4446	-201.587
0.3872	-78.3775	-196.474
0.3874	-79.874	-196.598
0.3876	-74.9481	-197.222
0.3878	-78.9387	-194.167
0.388	-79.001	-191.049
0.3882	-79.001	-188.368
0.3884	-81.6822	-191.049
0.3886	-73.2646	-191.111
0.3888	-72.641	-197.845
0.389	-75.5716	-199.03
0.3892	-74.5116	-201.462
0.3894	-74.6363	-202.709
0.3896	-75.4469	-202.958
0.3898	-74.1998	-203.831
0.39	-74.3869	-201.774
0.3902	-76.3199	-203.52
0.3904	-70.9575	-200.901
0.3906	-72.5787	-199.404
0.3908	-74.1375	-198.469
0.391	-79.6245	-198.22
0.3912	-82.5551	-207.074
0.3914	-84.7998	-211.189
0.3916	-92.0951	-212.062
0.3918	-93.841	-217.237
0.392	-92.9681	-215.242
0.3922	-92.2198	-211.501
0.3924	-99.9516	-209.88
0.3926	-97.5198	-209.069
0.3928	-104.192	-206.201
0.393	-98.2681	-204.704
0.3932	-97.1457	-204.642
0.3934	-91.2222	-202.397
0.3936	-89.9128	-200.651
0.3938	-84.4881	-197.658
0.394	-86.8575	-197.222
0.3942	-82.7422	-197.97
0.3944	-85.2987	-200.028
0.3946	-85.174	-198.095
0.3948	-87.2939	-197.97
0.395	-85.6104	-203.208
0.3952	-85.174	-206.637
0.3954	-83.4281	-211.376
0.3956	-85.2363	-217.424
0.3958	-82.2434	-220.667
0.396	-80.8093	-221.789
0.3962	-80.7469	-223.098
0.3964	-77.4422	-220.168
0.3966	-77.2552	-221.54
0.3968	-77.1928	-215.99
0.397	-77.6916	-214.556
0.3972	-76.881	-210.067
0.3974	-79.3128	-211.625
0.3976	-75.9457	-209.63
0.3978	-78.4399	-207.136
0.398	-76.694	-204.081
0.3982	-75.821	-200.776
0.3984	-79.9987	-200.901
0.3986	-76.0081	-202.647
0.3988	-77.0057	-205.016
0.399	-80.1234	-204.704
0.3992	-77.941	-208.633
0.3994	-79.7493	-205.39
0.3996	-76.3199	-203.333
[truncated: 203,001+ more rows]

## Sheet: Fig5H
Time (s)	wild type										flwr-1
1	0.235	0.216914	0.532128	0	0.0501626	0	0.539902	0.175962	0.224742		0.144444	0.317101	0.271901	0.32803	0.472072	0	0	0.332267
2	0.979592	1	0.957447	1	1	0.797038	1	0.971154	0.824742		1	0.93913	0.958678	1	0.981982	0.782106	0.918033	0.928
3	1	0.679012	1	0.989754	0.910569	1	0.784314	0.951923	0.938144		0.894737	1	1	1	0.927928	0.86134	0.908925	1
4	0.989796	0.839506	0.879433	0.866803	0.926829	0.992483	0.77451	1	1		0.824561	0.782609	0.867769	0.704545	0.963964	0.663255	1	0.736
5	0.938776	0.728395	0.907801	0.856557	0.943089	0.917312	0.647059	0.913462	0.927835		0.877193	0.747826	0.942149	0.818182	0.963964	0.613734	0.817851	0.664
6	0.897959	0.814815	0.879433	0.836066	0.95122	0.797038	0.715686	0.788462	0.85567		0.719298	0.765217	0.85124	0.738636	0.90991	0.554308	0.918033	0.72
7	0.918367	0.876543	0.780142	0.887295	0.739837	0.902278	0.715686	0.788462	0.85567		0.754386	0.721739	0.793388	0.670455	0.846847	0.633542	0.817851	0.536
8	0.877551	0.901235	0.836879	0.969262	0.747967	0.834624	0.656863	0.855769	0.762887		0.684211	0.608696	0.752066	0.602273	0.945946	0.415649	0.854281	0.584
9	0.795918	0.975309	0.765957	0.82582	0.780488	0.849658	0.637255	0.807692	0.783505		0.368421	0.686957	0.727273	0.659091	0.945946	0.514691	0.781421	0.448
10	0.795918	0.839506	0.77305	0.969262	0.780488	0.76697	0.607843	0.769231	0.752577		0.947368	0.686957	0.619835	0.625	1	0.504787	0.744991	0.472
11	0.734694	0.888889	0.744681	0.877049	0.886179	0.71435	0.539216	0.807692	0.680412		0.561404	0.53913	0.636364	0.579545	0.945946	0.425553	0.726776	0.464
12	0.765306	0.765432	0.730496	0.938525	0.699187	0.751936	0.617647	0.682692	0.628866		0.54386	0.513043	0.636364	0.556818	0.828829	0.445362	0.663024	0.368
13	0.77551	0.814815	0.730496	0.836066	0.731707	0.842141	0.637255	0.721154	0.824742		0.491228	0.530435	0.628099	0.568182	0.738739	0.445362	0.526412	0.408
14	0.653061	0.888889	0.780142	0.846311	0.739837	0.729384	0.637255	0.721154	0.618557		0.315789	0.486957	0.46281	0.420455	0.63964	0.425553	0.489982	0.416
15	0.571429	0.82716	0.765957	0.82582	0.788618	0.864692	0.627451	0.653846	0.670103		0.315789	0.365217	0.520661	0.397727	0.711712	0.435457	0.435337	0.352
16	0.520408	0.82716	0.70922	0.846311	0.707317	0.797038	0.519608	0.740385	0.628866		0.298246	0.434783	0.446281	0.556818	0.63964	0.445362	0.508197	0.256
17	0.540816	0.654321	0.638298	0.836066	0.715447	0.759453	0.607843	0.586538	0.670103		0.368421	0.391304	0.371901	0.386364	0.621622	0.376032	0.471767	0.344
18	0.377551	0.604938	0.652482	0.764344	0.650407	0.76697	0.607843	0.548077	0.628866		0.280702	0.313043	0.46281	0.443182	0.54955	0.494883	0.3898	0.216
19	0.438776	0.765432	0.64539	0.620902	0.699187	0.827107	0.490196	0.586538	0.71134		0.157895	0.347826	0.404959	0.306818	0.567568	0.5345	0.480874	0.264
20	0.387755	0.864198	0.652482	0.784836	0.642276	0.812072	0.529412	0.509615	0.618557		0.192982	0.226087	0.363636	0.352273	0.477477	0.46517	0.289617	0.176
21	0.5	0.62963	0.58156	0.754098	0.666667	0.812072	0.54902	0.528846	0.721649		0.140351	0.2	0.355372	0.420455	0.540541	0.584021	0.408015	0.16
22	0.397959	0.580247	0.553191	0.672131	0.585366	0.729384	0.480392	0.567308	0.56701		0.0526316	0.191304	0.297521	0.363636	0.585586	0.633542	0.289617	0.224
23	0.397959	0.666667	0.602837	0.764344	0.544715	0.654213	0.588235	0.528846	0.56701		0.0526316	0.347826	0.355372	0.375	0.45045	0.742489	0.3898	0.12
24	0.357143	0.592593	0.468085	0.866803	0.585366	0.729384	0.372549	0.519231	0.659794		0.105263	0.2	0.31405	0.261364	0.495495	0.60383	0.453552	0.152
25	0.397959	0.592593	0.560284	0.805328	0.487805	0.71435	0.284314	0.442308	0.494845		0.105263	0.208696	0.305785	0.295455	0.513514	0.623638	0.526412	0.152
26	0.387755	0.703704	0.41844	0.661885	0.528455	0.594077	0.27451	0.346154	0.484536		0.0526316	0.278261	0.280992	0.295455	0.531532	0.792011	0.480874	0.2
27	0.397959	0.765432	0.489362	0.682377	0.577236	0.654213	0.196078	0.413462	0.57732		0.105263	0.13913	0.338843	0.329545	0.378378	0.692968	0.553734	0.208
28	0.295918	0.691358	0.48227	0.661885	0.528455	0.684282	0.245098	0.278846	0.649485		0.0877193	0.130435	0.247934	0.215909	0.324324	0.772202	0.471767	0.136
29	0.295918	0.45679	0.468085	0.620902	0.560976	0.496354	0.156863	0.298077	0.556701		0.105263	0.156522	0.272727	0.295455	0.342342	0.792011	0.508197	0.112
30	0.295918	0.765432	0.397163	0.538934	0.560976	0.518906	0.205882	0.298077	0.484536		0.0701754	0.182609	0.289256	0.272727	0.36036	0.702872	0.435337	0.184
31	0.316327	0.617284	0.375887	0.528689	0.422764	0.586559	0.156863	0.298077	0.618557		0.0350877	0.182609	0.421488	0.25	0.369369	0.811819	0.453552	0.144
32	0.0510204	0.160494	0	0.20082	0.0894309	0.4287	0.0882353	0	0.237113		0.0175439	0.121739	0	0.147727	0	0.643447	0.42623	0.016
33	0.0408163	0	0.0496454	0.364754	0.0731707	0.4287	0.196078	0.105769	0.216495		0.0526316	0.0173913	0.0247934	0.0227273	0.045045	0.692968	0.189435	0.088
34	0.0306122	0.0987654	0.269504	0.313525	0.146341	0.413666	0	0.0576923	0.175258		0.0701754	0.113043	0.00826446	0.147727	0.225225	0.851436	0.307832	0.064
35	0.0306122	0.0864198	0.113475	0.354508	0.0813008	0.368563	0.0196078	0.125	0.103093		0.0350877	0.0869565	0.0661157	0.125	0.243243	0.752394	0.408015	0.032
36	0.0714286	0.0740741	0.0921986	0.129098	0	0.315944	0.107843	0.153846	0.237113		0.0526316	0.113043	0.0165289	0.159091	0.243243	0.86134	0.462659	0.088
37	0.0510204	0.197531	0.0992908	0.211066	0.097561	0.443734	0.176471	0.0865385	0.340206		0.0350877	0.0608696	0.0165289	0.170455	0.189189	0.881149	0.362477	0.008
38	0	0.0864198	0.12766	0.118852	0.105691	0.218221	0.137255	0.0384615	0		0	0.104348	0.00826446	0	0.144144	1	0.335155	0.048
39	0.0306122	0.222222	0.148936	0.129098	0.252033	0.173119	0.284314	0.125	0.164948		0.0175439	0	0.0247934	0.125	0.171171	0.970287	0.298725	0
40	0.0102041	0.0123457	0.106383	0.354508	0.203252	0.150568	0.313725	0.182692	0.0927835		0.0350877	0.0782609	0.0661157	0.0340909	0.135135	0.801915	0.335155	0
41	0.0306122	0.0740741	0.0851064	0.385246	0.0325203	0.0753965	0.196078	0.125	0.206186		0	0.113043	0.0743802	0.0568182	0.108108	0.881149	0.28051	0.048
