# Supplementary material for: Flower/FLWR-1 regulates neuronal activity via the plasma membrane Ca2+ ATPase to promote recycling of synaptic vesicles
Source: eLife. 2025 May 20;13:RP103870. doi: 10.7554/eLife.103870 (PMC12092002; doi:10.7554/eLife.103870)
Supplement: Figure 6—figure supplement 1—source data 1. [file elife-103870-fig6-figsupp1-data1.xlsx]

## Sheet: FigS6_1
DCV number
wildtype (- ATR)	wildtype (+ ATR)	flwr-1 (- ATR)	flwr-1 (+ ATR)
5.702	0	0	0
0	2.0857	1.12129	1.44764
0	0	3.46405	1.12321
1.09494	0	5.50108	0
0	0.658017	0	0
0	0	3.85725	2.26958
0.920866	1.91428	3.75947	0.576626
2.91348	0.628232	1.96493	0
4.2887	2.31514	0.871774	0
1.17268	0.631532	0	0
4.45448	1.55635	0	0
2.18988	2.59329	3.45412	0
0	0	17.0705	0
0.865264	2.87339	2.55725	0
1.81855	2.57245	1.42957	0
2.91348	2.82585	1.17268	0
4.75687	2.53288	2.22895	0
1.21211	0.529486	3.28482	3.92986
2.22724	2.30501	0	1.74355
3.28482	0.61068	2.06297	1.68236
1.04684	1.94267	1.92863	0
0.865264	3.57661	1.87973	0
1.84173	0	1.96493	10.2423
2.91348	8.25161	1.74355	0
4.2887	0	2.52353	2.78072
1.21211	0	0	2.80627
1.61005	1.87973	0.690825	0
1.09494	0	0.883642	0
1.04684	2.61532	0.834855	9.05529
0.865264	0.841178	2.62451	0
2.7626	7.70051	0.77926	6.02771
0.971158	0.690825	0	6.93759
4.2887	3.41411	2.28345	4.08421
1.32148	1.27862	0.690825	0
0	0	0.861125	1.4356
1.09494	1.87085	0	0
4.18735	0	0	0
2.59579	1.22463	0	0
0.920866	6.79147	1.72375	0.690825
1.20475	1.04684	0	2.58338
1.02539	3.46106	3.28234	0.639312
1.21211	4.60433	0	2.78072
2.22724	1.94232	0	3.74169
3.28544	1.02575	0	1.14634
2.09368	1.21211	1.63083	0
0	3.34086	0	0
0	3.53457	0.855733	0
0	0	0.857527	0
0	6.56128	2.17631	0
1.21211	1.55852	3.93286	4.08421
2.22724	2.01916	1.0483	1.06522
2.18988		0.70375	0
1.04684		0.763022	5.45639
1.73053		0	0
0.892276		0	0
0.606315			0
			2.58338
			2.58338
			2.06229
