# Supplementary material for: Flower/FLWR-1 regulates neuronal activity via the plasma membrane Ca2+ ATPase to promote recycling of synaptic vesicles
Source: eLife. 2025 May 20;13:RP103870. doi: 10.7554/eLife.103870 (PMC12092002; doi:10.7554/eLife.103870)
Supplement: Figure 6—source data 1. [file elife-103870-fig6-data1.xlsx]

## Sheet: Fig6B
wildtype (- ATR)	wildtype (+ ATR)	flwr-1 (- ATR)	flwr-1 (+ ATR)
28.51	7.64099	12.1556	5.67572
38.7876	11.819	41.4877	0.72382
32.295	8.86388	25.9803	4.49284
36.133	9.2166	41.2581	31.9232
31.4051	11.8443	6.18013	3.78582
14.7095	17.8573	0	6.80873
18.4173	17.2285	15.0379	2.88313
12.6251	15.0776	29.4739	4.66043
31.4505	17.7494	0.871774	8.47722
24.6262	17.6829	19.4018	11.6754
22.2724	26.458	61.6041	5.52527
16.4241	5.18659	42.1403	8.97032
27.2178	6.62091	85.3526	12.1242
27.6885	22.9871	11.5076	11.0022
38.1896	23.1521	30.0209	18.5667
34.9617	20.7229	25.7989	6.75019
15.8562	27.8617	22.2895	15.0379
15.7575	11.1192	7.66458	35.3687
17.8179	10.9488	16.7494	13.9484
13.1393	6.1068	24.7556	16.8236
13.6089	19.4266	17.3576	7.70051
11.2484	16.9889	39.4744	8.2899
17.4965	58.8888	43.2285	6.82821
32.0482	63.2624	17.4355	8.31105
25.7322	14.4408	4.20589	9.26908
41.2119	15.429	41.0694	8.41881
33.811	33.8352	8.2899	6.87801
36.133	35.3687	30.0438	1.22463
10.4684	23.5379	17.5319	38.485
11.2484	21.0294	28.8696	9.55918
6.44606	56.4704	15.5852	39.1801
18.452	15.889	9.08809	27.7504
48.6053	78.5244	36.5351	6.80702
32.3762	17.9007	8.2899	8.52172
51.2107	10.196	15.5002	5.74239
24.0887	24.321	17.945	12.2769
26.1709	26.3657	14.0648	12.9928
22.4969	11.8381	22.0143	31.9682
10.1295	27.1659	6.89502	2.7633
20.4808	12.562	17.097	12.0557
23.584	17.3053	14.2235	7.67174
33.9392	12.8921	19.7476	8.34217
36.7495	9.71158	38.1431	8.41881
13.1417	13.3348	39.8811	26.3657
7.32787	32.7271	34.2475	4.49031
25.0927	27.8405	10.4925	20.3744
23.9425	21.2074	7.7016	4.52803
38.8463	18.3668	5.14516	54.2956
27.6953	30.1819	13.0579	9.25012
26.6665	21.04	24.9081	38.1193
31.1814	25.2394	29.3523	12.7826
21.8988		9.14875	4.30679
25.1241		24.4167	30.0101
31.1495		26.4282	25.9855
31.2297		29.1784	50.2358
27.8905			8.2899
			13.778
			11.1946
			9.2803

## Sheet: Fig6C
wildtype (- ATR)	wildtype (+ ATR)	flwr-1 (- ATR)	flwr-1 (+ ATR)
0	0	1.10505	0.472977
2.42423	1.39047	0	0
0	0	1.73202	0
2.18988	1.41794	0	3.99041
1.04684	1.31604	2.06004	0
0	0	0	4.53916
1.84173	2.55238	3.75947	0
0.971158	1.8847	0	1.16511
0	0	2.61532	2.1193
3.51803	1.8946	0.808407	1.66791
0	0	2.56684	0
0	0	0.690825	0
0	0	0	0
1.73053	2.87339	0.639312	2.75054
0.909277	1.28623	1.42957	2.06297
0	0	0	0.964314
3.17125	0.844294	0	3.75947
0	0	0	5.89479
0	0	0	3.4871
0	0.61068	0	4.20589
0	0.971333	0.964314	12.8342
0.865264	0.894152	1.87973	0
0	0	0	6.82821
0.971158	5.50108	0	2.55725
1.42957	0	0	1.85382
1.21211	0.964314	0	0.935423
0.805024	1.87973	0.690825	1.14634
1.09494	0	0	0
1.04684	2.61532	0.834855	2.26382
0	1.68236	0	0.503115
0	0	0	3.01386
0.971158	1.38165	0	0
1.42957	0	2.28345	0
0.660738	1.27862	0	1.06522
1.11328	0	0	0
0	1.87085	0.717798	0
1.04684	1.14634	0.639312	1.99889
0.865264	0	0	0
0	2.26382	0.861878	1.38165
0	0	2.13713	0
1.02539	0.865264	0	0.639312
1.21211	0	0	1.85382
1.11362	0	2.3117	1.87085
0	1.02575	1.47708	2.29267
0	0	0	0.40821
0	1.11362	0	2.26382
0	0	0	0
0.971158	0.834855	0	6.03284
0	1.31226	1.08815	0
1.21211	0	3.93286	0
0	3.02873	1.0483	3.19565
0		0.70375	0.717798
1.04684		0	4.09229
0		2.03294	0
0.892276		1.82365	0
0		0.77881	2.7633
			0
			1.72225
			0

## Sheet: Fig6D
wildtype (- ATR)	wildtype (+ ATR)	flwr-1 (- ATR)	flwr-1 (+ ATR)
5.702	0	1.10505	0
2.42423	2.0857	0	0
2.22724	0	0	0
2.18988	0	0	0
3.14051	0.658017	4.12009	0
1.73053	0	0	2.26958
0.920866	1.91428	0	0
1.94232	0.628232	5.89479	1.16511
2.85914	2.31514	0	0
2.34535	0.631532	0.808407	1.66791
3.34086	1.55635	2.56684	2.21011
1.09494	2.59329	2.07247	1.12129
0	0	0	0
2.59579	2.87339	1.27862	0
2.72783	2.57245	1.42957	2.06297
2.91348	2.82585	1.17268	0
1.58562	2.53288	1.11448	0
2.42423	0.529486	1.09494	1.96493
1.11362	2.30501	2.09368	0.871774
3.28482	0.61068	2.06297	0.841178
1.04684	1.94267	0	0
1.73053	3.57661	1.87973	0.690825
2.7626	0	5.89479	0
3.88463	8.25161	1.74355	0.639312
2.85914	0	0.841178	0
2.42423	0	10.2673	0
0.805024	1.87973	0.690825	1.14634
0	0	0.883642	0.40821
3.14051	2.61532	1.66971	4.52764
3.46106	0.841178	1.31226	0
0	7.70051	0	3.01386
0	0.690825	1.00979	2.31253
4.2887	3.41411	2.28345	1.3614
0	1.27862	2.07247	0
0	0	0	0
4.37976	1.87085	1.4356	0
3.14051	0	1.91793	0.999444
0	1.22463	3.14489	2.28345
1.84173	6.79147	0.861878	0
1.20475	1.04684	0	0.861125
1.02539	3.46106	1.09411	0.639312
1.21211	4.60433	1.03935	0.926908
2.22724	1.94232	1.15585	0.935423
2.19029	1.02575	2.95415	1.14634
4.18735	1.21211	3.26167	0
1.73053	3.34086	3.14777	2.26382
4.60433	3.53457	1.71147	0
3.88463	0	2.57258	6.03284
3.07726	6.56128	1.08815	0
2.42423	1.55852	1.31095	1.3614
1.11362	2.01916	1.0483	1.06522
3.28482		0.70375	1.4356
0		1.52604	1.3641
3.46106		2.03294	0
1.78455		0	2.28345
1.21263			0
			0
			0
			0
