# Supplementary material for: Flower/FLWR-1 regulates neuronal activity via the plasma membrane Ca2+ ATPase to promote recycling of synaptic vesicles
Source: eLife. 2025 May 20;13:RP103870. doi: 10.7554/eLife.103870 (PMC12092002; doi:10.7554/eLife.103870)
Supplement: Figure 7—figure supplement 1—source data 1. [file elife-103870-fig7-figsupp1-data1.xlsx]

## Sheet: FigS7_1B
Time (h)	wild type			flwr-1			flwr-1 + GABAergic::MCA-3b
0	1	1		1	1		1	1
0.5	1	1		1	1		1	1
1	1	1		1	1		1	1
1.5	0.933333	0.533333		1	1		0.666667	0.333333
2	0.333333	0.133333		1	0.769231		0.133333	0.0666667
2.5	0.0666667	0		0.733333	0.769231		0	0
3	0	0		0.533333	0.615385		0	0
3.5	0	0		0.466667	0.384615		0	0
4	0	0		0.333333	0.307692		0	0
4.5	0	0		0.266667	0.230769		0	0
5	0	0		0.2	0.153846		0	0
5.5	0	0		0.0666667	0.0769231		0	0
6	0	0		0.0666667	0		0	0
