# Supplementary material for: Flower/FLWR-1 regulates neuronal activity via the plasma membrane Ca2+ ATPase to promote recycling of synaptic vesicles
Source: eLife. 2025 May 20;13:RP103870. doi: 10.7554/eLife.103870 (PMC12092002; doi:10.7554/eLife.103870)
Supplement: Figure 7—source data 1. [file elife-103870-fig7-data1.xlsx]

## Sheet: Fig7B+C
Marked blue are outliers as detected by GraphPad outlier detection of signal size (iterative Grubbs; alpha = 0.01)
Time (s)	wild type
0.2	-0.01908	0.050618	0.174179	-0.03371	0.017095	0,055961*	-0.04504	0.621716	-0.0416	-0.05032	-0.05642	0.04067	0.025621	0.097461	-0.03321	0.020402	0.002654	0.02276	-0.08739	-0.07213	-0,19383*	0.05316	0.075389	0.006088	0.109599	-0.02856	0.192259	0.063116	-0.0797	0.088303	0.012731	0.006757	-0.01641	0.019503	0.007168	-0.00428	-0.00989	0.001352	0.002821	0.060608	0.096621	0.029637	0.005007	0.184462	-0,17816*	0.000109	-0.00076	0.038221	-0.01775
0.4	0.004284	0.053142	0.22861	-0.022	0.016858	0,041465*	0.017382	0.673606	-0.04572	-0.04926	-0.10723	0.084717	0.017468	0.039974	-0.03984	0.049671	0.013082	0.040376	-0.11173	-0.0332	0,033358*	0.10468	0.005214	-0.04303	0.022082	-0.03156	0.085077	0.021629	0.01038	0.070751	0.01305	0.036513	0.006935	0.009672	-0.01179	0.031712	0.042862	0.028059	-0.005	0.02611	0.075861	0.03239	0.018249	0.152519	0,233795*	0.023112	0.007313	0.115574	-0.00384
0.6	-0.00948	0.073342	0.197082	-0.02648	0.036103	0,094832*	-0.01459	0.679423	-0.00319	-0.03785	-0.06415	-0.05337	0.032719	0.068961	-0.01673	0.055803	0.024629	0.02819	-0.04842	0.017802	-0,17736*	0.042261	0.019964	-0.01712	-0.01002	-0.05618	0.046296	0.006657	0.042942	0.00624	0.006108	0.004834	0.03178	0.01419	-0.01349	0.013838	-0.01544	0.101372	0.010207	0.101643	0.081811	0.05509	-0.04175	0.174488	0,395535*	-0.00846	-0.00238	0.035236	0.023706
0.8	-0.00205	0.07048	0.167547	0.031999	0.05968	-0,02173*	0.195218	0.335579	-0.00968	-0.04845	-0.08477	-0.01858	0.030569	0.107417	0.003179	0.062939	0.02485	0.050867	-0.09643	0.001778	0,023795*	-0.04369	-0.02477	-0.00838	-0.00938	-0.03707	-0.02358	0.07939	0.097088	0.042929	0.006096	0.108615	0.02087	0.031059	0.090366	0.003687	0.016515	0.12545	0.01058	0.03561	0.042694	0.085088	0.02268	0.18431	0,102479*	-0.04843	0.01351	0.038887	0.025056
1	0.004845	0.023939	0.162632	0.027122	-0.02891	0,04176*	0.031445	0.52408	0.055011	-0.05234	-0.01851	0.012722	0.00204	0.144129	-0.01513	0.040993	-0.0298	-0.00617	-0.08056	-0.02536	-0,37421*	-0.05481	-0.0235	-0.02051	0.030117	-0.00722	0.048362	-0.02635	0.033618	0.093248	0.009913	0.024619	0.017734	0.021019	0.090039	0.02225	-0.01601	0.03055	0.033005	0.042172	0.092678	0.041901	-0.00398	0.178965	-0,15345*	-0.06054	0.013304	0.066641	0.022791
1.2	0.011686	0.081558	0.064043	0.030245	0.053735	-0,01762*	0.143976	0.457599	0.015323	0.012168	0.042816	0.030818	0.019881	0.101875	-0.00322	0.011408	-0.03615	0.019702	-0.10639	-0.04566	0,2737*	-0.09306	-0.01202	-0.00331	0.116755	-0.02303	0.024163	0.015846	0.03642	0.031503	-0.00071	0.000394	0.010975	0.019616	0.072673	0.030391	-0.05383	-0.01214	0.033813	0.084774	0.108351	0.055435	-0.00542	0.197153	-0,09529*	0.040865	-0.00234	-0.0811	0.010408
1.4	-0.01715	-0.02114	0.048667	0.019253	-0.03302	0,028043*	-0.00908	0.475049	-0.06505	-0.04635	-0.03864	0.007181	0.002569	0.027652	-0.00716	-0.03444	-0.00226	0.030213	-0.06885	-0.01902	-0,08054*	-0.00635	-0.048	-0.00058	0.033359	0.015768	-0.09431	-0.06421	0.049645	0.018875	0.020815	0.052014	0.011286	0.037891	0.04253	0.029691	-0.09164	0.037289	0.034721	0.105846	0.009488	-0.04073	0.036868	0.218727	0,03297*	-0.01668	-0.00133	-0.02068	0.000309
1.6	-0.00676	-0.01378	0.01102	0.023206	-0.0861	0,021949*	0.024413	0.212836	0.082005	-0.08362	-0.05103	-0.0353	-0.01462	-0.0496	-0.02377	-0.05328	0.006116	0.020718	0.030856	-0.06214	0,06477*	-0.0768	-0.05225	0.008182	-0.04181	0.013849	-0.07564	0.049204	0.106724	-0.00899	0.01391	0.027744	0.007808	-0.00223	0.015226	-0.05098	-0.0693	0.029526	0.024791	0.01766	-0.0078	-0.03689	-0.01622	0.177939	0,158377*	-0.03232	0.023539	0.012174	0.008816
1.8	0.021368	-0.06955	0.0498	0.020956	-0.05073	0,054109*	-0.08435	0.42582	-0.08833	-0.03076	-0.06189	0.010272	0.006335	-0.06455	-0.01336	-0.06013	0.010779	0.04596	-0.04613	-0.07188	-0,20539*	-0.00589	0.003945	0.003118	0.018392	-0.00469	-0.1581	0.018568	0.007266	0.024955	0.000977	0.048732	0.008245	0.025028	0.032171	-0.0006	-0.0052	-0.01628	0.035727	-0.01988	0.045852	0.011736	-0.00868	0.197162	-0,0855*	-0.04486	0.005872	0.034747	0.025376
2	-0.02196	-0.01864	0.092433	0.009468	-0.02734	-0,0828*	-0.08231	0.192396	0.042428	0.02277	-0.06786	0.00321	0.012861	-0.10612	-0.00694	-0.0346	0.010495	0.067505	-0.00051	-0.09675	0,121685*	0.067467	-0.01238	-0.01283	-0.03728	-0.06784	-0.2191	0.003309	0.010314	-0.02756	-0.00285	0.007026	-0.0027	0.067589	0.066226	0.006894	0.072042	-0.00211	0.034852	-0.01207	0.03637	-0.02098	0.014176	0.183737	-0,11008*	0.031086	-0.02648	-0.04199	0.017318
2.2	0.034602	-0.02707	0.013597	0.003114	0.057928	-0,04154*	-0.02625	0.007378	-0.0804	-0.00146	-0.02465	-0.00135	0.010234	-0.13109	-0.00907	-0.06123	0.029368	0.073186	0.013058	-0.06873	0,074666*	0.072808	-0.03194	-0.02207	-0.01892	-0.01571	-0.2103	0.057017	0.015739	-0.03879	0.002669	0.071046	0.002964	-0.01808	0.03606	0.013968	0.156525	0.06091	0.035751	-0.03929	0.078708	-0.00468	-0.03824	0.182866	-0,06319*	0.044262	-0.00922	0.016647	0.003389
2.4	-0.005	-0.0072	0.014026	0.046067	0.129025	0,051102*	0.030005	-0.00544	0.027924	-0.09162	-0.07742	-0.02967	0.002826	-0.1543	-0.00368	-0.04409	-0.03052	0.027232	0.073373	-0.07048	0,254507*	0.033598	0.00833	0.007406	-0.08674	0.011819	-0.19696	0.011857	0.084617	-0.02016	0.007512	-0.04006	0.029696	-0.03558	0.039692	-0.02176	0.134875	0.003871	-0.00236	-0.04356	0.014513	0.028358	-0.02879	0.146999	0,066999*	-0.04524	-0.01504	-0.01897	-0.02693
2.6	-0.03133	-0.05348	-0.04241	0.034043	0.126373	-0,04865*	0.043708	-0.08401	0.069238	-0.06439	0.023986	0.014737	-0.02855	-0.10842	0.001045	-0.13001	-0.03836	0.008165	0.021336	-0.06391	-0,0391*	0.033164	-0.03988	0.010342	-0.00685	-0.05266	-0.19319	-0.00347	0.17126	-0.03086	-0.00747	0.036771	0.026164	-0.0235	0.010403	-0.01503	0.026231	0.085182	-0.01073	-0.04271	-0.03827	0.029725	-0.03871	0.089869	0,126502*	-0.01212	-0.00539	-0.04064	0.022008
2.8	-0.00057	0.012291	-0.0113	0.053774	0.105624	0,00901*	0.037341	-0.14192	-0.05123	-0.04073	-0.04084	0.029181	-0.00227	-0.06632	-0.00338	-0.10754	-0.05623	-0.02695	0.0475	-0.02313	0,086221*	-0.08405	0.006791	0.006824	0.007411	0.135817	-0.18877	0.001334	0.145777	-0.08197	-0.00351	-0.02202	0.021336	-0.04967	-0.0125	0.024971	0.035963	-0.03939	-0.02601	-0.04831	-0.06458	-0.0025	-0.07642	-0.00403	-0,01508*	-0.02989	0.024661	0.017125	-0.00141
3	0.027285	0.03181	0.028519	0.029942	0.048154	-0,03797*	0.047667	-0.34948	-0.04886	-0.02089	0.024571	0.04346	0.004844	-0.0003	-0.00234	-0.01895	-0.01331	0.035391	0.018435	-0.00014	0,125271*	0.008109	-0.03346	-0.00248	-0.08294	-0.02555	-0.04124	-0.01497	0.112263	0.035231	-0.00419	-0.0587	0.015247	-0.03137	0.037625	0.011117	0.052078	-0.05906	-0.01426	-0.09007	0.021195	-0.0043	0.052845	-0.13258	0,119483*	0.057692	0.0189	-0.03006	-0.00745
3.2	0.029015	-0.00114	-0.08357	0.015894	-0.10963	-0,03298*	-0.03303	-0.47383	0.020275	0.00298	0.070322	-0.00192	0.003015	0.056557	0.001598	-0.05479	-0.00342	-0.00775	0.002298	-0.03233	0,252581*	0.029494	-0.02365	0.003128	-0.05958	0.10026	-0.02851	-0.03253	0.052251	-0.03785	0.001677	-0.08919	0.052334	-0.01737	0.029929	-0.04013	0.007145	0.039863	-0.03969	-0.0411	0.010904	-0.041	-0.02812	-0.17504	0,0686*	0.01701	0.002866	-0.07092	0.03672
3.4	0.022004	-0.03168	-0.14682	-0.00752	-0.14038	-0,0152*	0.003235	-0.4201	0.077127	0.075109	0.107995	-0.07392	0.01425	0.052633	0.012233	-0.01303	0.032895	0.012811	0.028046	0.05556	-0,05663*	-0.26156	0.004349	0.017852	0.032353	0.025342	-0.02961	-0.01266	-0.03646	-0.0217	-0.01668	-0.15127	0.023353	-0.01135	-0.03647	-0.0552	0.021181	0.081736	-0.02031	-0.09349	-0.05734	-0.04615	0.016381	-0.22	0,004915*	0.026749	0.016774	0.033322	-0.00569
3.6	0.005219	-0.06918	-0.16542	-0.02663	-0.14378	-0,03126*	-0.07813	-0.4086	-0.11797	0.053709	0.022074	0.014854	-0.00419	-0.00489	0.022912	0.036217	0.015397	-0.04804	0.054951	0.061152	0,1003*	-0.03292	0.041119	0.006457	-0.07833	0.050262	0.06353	0.005003	-0.17058	-0.04678	-0.00234	-0.15416	0.014966	0.007124	-0.1148	0.001113	0.039089	-0.07004	-0.03592	-0.04554	0.009286	0.015326	0.019101	-0.26368	0,099215*	0.010548	-0.01725	-0.06285	-0.00507
3.8	-0.00783	-0.0336	-0.18486	-0.03461	-0.13308	-0,01792*	-0.04859	-0.56552	0.080084	0.044231	0.036572	0.056799	-0.03299	-0.03305	0.01848	0.014298	0.03276	-0.0876	0.05601	0.049346	0,112121*	-0.17657	0.083927	0.029363	0.009927	-0.00661	-0.01136	-0.00344	-0.20851	-0.02294	0.020804	-0.04248	-0.00787	-0.00622	-0.10887	-0.01743	0.028041	-0.0518	-0.02021	0.000218	-0.11544	-0.03058	0.031442	-0.25325	-0,05403*	-0.01858	-0.00796	-0.01398	-0.00643
4	-0.03718	-0.04945	-0.16729	-0.04223	0.003996	0,069222*	-0.11935	-0.46811	-0.04399	0.089744	0.057295	-0.01153	-0.01945	-0.02705	0.016458	0.101788	0.005464	-0.04013	-0.04917	0.101728	-0,20811*	-0.03675	-0.05879	0.020006	0.005486	-0.0461	0.019151	0.009214	-0.18827	-0.07029	-0.00426	-0.07731	-0.01795	0.014187	-0.10676	-0.01121	-0.02587	-0.00745	-0.01345	0.041701	-0.1453	-0.02352	0.012458	-0.27495	-0,13884*	0.053382	-0.02875	-0.02287	-0.03586
4.2	0.007315	-0.00753	-0.05619	-0.05869	0.026065	0,010996*	-0.02561	-0.52523	0.074097	0.047884	0.068856	0.026372	-0.01886	-0.0236	0.032245	0.114099	0.008845	-0.06873	0.077041	0.097357	0,114645*	0.02639	0.035061	0.015697	0.031315	0.024181	0.046632	-0.08991	-0.20845	-0.03544	-0.01363	0.021089	-0.03566	0.020377	-0.05963	-0.02583	-0.051	-0.02989	-0.01244	0.008266	-0.10697	-0.01247	0.011313	-0.24274	-0,29693*	0.039946	-0.04514	-0.08596	-0.01028
4.4	-0.03009	-0.01316	-0.17446	-0.03635	0.032	-0,07432*	-0.03234	-0.38412	0.102366	0.089676	0.029047	-0.04272	-0.0253	-0.00498	0.014758	0.053406	0.009689	-0.0649	0.099201	0.089307	-0,25088*	0.069682	0.034503	0.016148	-0.02036	-0.0118	0.270879	-0.03333	-0.22366	-0.0163	-0.01622	0.025867	-0.04063	0.000207	-0.03915	0.017773	-0.05585	-0.10495	-0.01823	-0.02637	-0.03338	-0.05803	0.001492	-0.24599	0,01458*	-0.00282	0.022087	-0.00563	-0.03099
4.6	0.010085	0.004175	-0.12365	-0.05747	0.041015	-0,01045*	0.090852	-0.44012	-0.02688	0.086604	0.043572	-0.06167	-0.02157	0.023177	0.028768	0.037062	-0.01809	-0.11816	0.059215	0.101639	0,114114*	0.189874	-0.01713	0.002421	0.05184	0.007723	0.329577	-0.03994	-0.05394	-0.00978	-0.0185	0.059895	-0.1071	-0.02619	-0.00087	0.008915	-0.11861	-0.06984	-0.02883	-0.00073	-0.13459	-0.01692	0.057977	-0.22443	-0,25799*	-0.00937	-0.03065	0.057112	-0.00709
4.8	0.010768	0.015242	-0.09619	0.000604	-0.00067	-0,04602*	-0.06658	-0.339	-0.02298	0.093174	0.166305	-0.04496	-0.01743	0.054444	0.02617	0.014	0.001114	-0.01465	0.114269	0.109185	-0,16568*	0.141784	0.059177	-0.02271	-0.01644	0.029549	0.344759	-0.02132	0.193269	0.057368	-0.0259	0.103286	-0.07337	-0.06592	-0.06578	0.026134	-0.11991	-0.16221	-0.00885	-0.0215	-0.02067	-0.04593	-0.01365	-0.23249	0,025098*	-0.01547	0.04386	0.029962	-0.03713
5	-0.0119	-0.00081	-0.19617	-0.00101	0.029249	-0,14752*	-0.06999	-0.58826	-0.03506	0.062809	0.000602	-0.12358	-0.00539	0.02675	0.032614	-0.07868	-0.03547	-0.11082	0.058145	0.092269	0,14121*	0.02385	0.0716	-0.02885	0.015094	-0.03568	0.420215	-0.07786	0.137714	0.083867	-0.01814	0.005003	-0.06395	-0.09765	-0.10791	0.059918	-0.05761	-0.08468	-0.0362	0.0171	-0.05619	-0.00766	-0.08705	-0.23081	-0,12928*	0.007657	0.043425	0.040052	-0.01153
5.2	0.665445	0.37239	0.187468	0.05171	0.137445	0,70689*	-0.05202	0.022396	-0.07314	0.323762	0.03117	0.023795	0.011642	0.230767	0.016845	0.061239	-0.01348	-0.1594	0.175203	0.091025	0,622425*	0.737448	0.145082	-0.00945	0.019431	0.007992	0.756832	0.003683	0.147317	0.058704	-0.01384	0.133346	-0.0105	0.173916	0.107802	0.445013	0.085816	-0.14038	-0.02377	0.411081	0.078373	0.051068	0.077526	-0.03591	2,216893*	0.005938	0.033312	0.260845	-0.02227
5.4	1.86529	1.6403	1.2102	0.140963	0.593791	3,892974*	-0.0154	0.99323	1.371	1.12826	0.177425	0.146763	0.047744	0.56871	0.037865	0.334842	0.01782	-0.07871	0.327416	0.2578	5,127227*	2.4196	0.816751	0.079391	-0.03136	-0.02033	1.04059	0.093358	0.075423	0.094196	0.036111	0.661759	0.255025	0.303171	0.552894	1.33329	0.307569	-0.09161	0.090824	0.773638	0.209477	0.601165	0.379629	0.251661	6,053927*	0.001688	0.037165	0.481711	0.010513
5.6	2.13996	2.13257	1.56083	0.137988	0.839136	5,39069*	0.202443	1.12011	1.67988	1.39275	0.150755	0.062582	0.029529	0.561213	0.052064	0.430639	-0.01177	-0.06548	0.417726	0.288088	7,62276*	2.62106	1.16433	0.060823	0.039812	0.045432	0.91962	0.174511	0.15987	0.156703	0.065905	0.776174	0.281486	0.302849	0.584099	1.54048	0.303465	0.023161	0.128636	0.792564	0.206669	0.668507	0.417281	0.301138	6,550624*	0.031152	0.088329	0.659115	0.002414
5.8	2.18138	2.25719	1.67628	0.152265	0.876253	6,446034*	0.326879	1.25265	1.80075	1.4423	0.200317	0.127476	0.022434	0.552802	0.076365	0.470965	-0.0015	-0.0929	0.44202	0.316797	9,169011*	2.69963	1.29911	0.090806	0.003098	0.120667	0.820402	0.132112	0.173128	0.247385	0.061037	0.900177	0.221037	0.257269	0.54779	1.55314	0.337596	0.081003	0.107361	0.80252	0.169621	0.797133	0.426565	0.317856	6,424172*	0.081454	0.105883	0.749607	0.039612
6	2.13507	2.433	1.61857	0.137526	0.886846	6,460959*	0.407187	1.09869	1.74488	1.49054	0.159759	0.046656	0.019773	0.548003	0.064599	0.484177	0.016445	-0.08803	0.434125	0.319791	9,218222*	2.57918	1.5054	0.092754	0.035835	-0.00863	0.740787	0.118518	0.143646	0.244485	0.089425	0.822668	0.25716	0.27983	0.596513	1.5557	0.344549	-0.09017	0.099835	0.778463	0.197817	0.778289	0.406458	0.316243	6,522931*	-0.01587	0.063773	0.949782	0.020928
6.2	2.0726	2.552	1.62722	0.123825	1.03194	6,298737*	0.373082	1.13401	1.92857	1.43064	0.183058	0.060587	0.019383	0.610259	0.070377	0.440795	0.001542	-0.0894	0.50991	0.292914	8,577287*	2.44561	1.65129	0.097501	-0.00986	0.012491	0.760765	0.145339	-0.03152	0.274573	0.104062	0.813529	0.212576	0.281307	0.659005	1.56513	0.33049	0.026952	0.088782	0.799968	0.154694	0.811522	0.37847	0.324016	6,427543*	-0.00493	0.11209	1.03996	0.070747
6.4	2.11973	2.57505	1.68246	0.160826	0.953322	6,325421*	0.399298	1.15449	1.6476	1.50427	0.089171	0.087527	0.02611	0.697457	0.080571	0.45292	-0.00318	-0.08304	0.446823	0.244993	8,997803*	2.42605	1.83414	0.112491	0.011252	-0.00276	0.734959	0.076877	-0.03154	0.246824	0.113403	0.847354	0.236338	0.2476	0.57068	1.50474	0.239	-0.0624	0.103594	0.757611	0.174724	0.708999	0.42726	0.314408	6,414891*	0.010901	0.095519	1.03814	0.038399
6.6	2.0449	2.53221	1.60676	0.149446	0.957986	6,138797*	0.428171	1.12879	1.85753	1.46346	0.067423	0.075921	0.032066	0.752353	0.071891	0.48126	0.019605	-0.06328	0.413679	0.273983	8,338738*	2.42307	2.0668	0.110757	-0.0358	-0.00148	0.830201	0.152905	-0.09739	0.222516	0.131641	0.886317	0.232569	0.230757	0.659892	1.4829	0.280768	-0.08631	0.074034	0.759471	0.163842	0.684726	0.425398	0.30071	6,265568*	-0.03142	0.093606	1.18037	0.037608
6.8	2.05443	2.51764	1.52557	0.164964	1.0718	6,343246*	0.470139	1.31039	1.86645	1.46559	0.05023	0.03789	0.037985	0.757835	0.072733	0.480442	0.007954	-0.0643	0.442159	0.236063	8,248021*	2.37251	2.02101	0.108686	0.079825	0.033168	0.783663	0.166827	-0.17821	0.17662	0.10365	0.869477	0.249108	0.234353	0.694554	1.45592	0.269289	-0.00326	0.086508	0.761268	0.149802	0.709855	0.400552	0.29397	6,357351*	-0.02104	0.098679	1.04595	0.009333
7	2.01384	2.53299	1.67198	0.149129	1.08191	6,176943*	0.3142	1.14769	1.81176	1.44002	0.060082	-0.03116	0.019553	0.74995	0.083306	0.510157	0.033619	-0.08714	0.489235	0.217915	8,120179*	2.46072	1.70383	0.129735	0.020245	-0.03801	0.915473	0.130483	-0.19403	0.145484	0.111184	0.860293	0.257278	0.259151	0.609733	1.40895	0.30472	-0.05502	0.074573	0.759349	0.14214	0.720566	0.385055	0.275912	6,081982*	0.011054	0.137843	1.11085	0.008353
7.2	2.00759	2.56264	1.62024	0.165949	1.09481	5,810192*	0.268827	0.778899	1.89504	1.44771	0.067338	0.085483	0.015172	0.76067	0.093458	0.48755	0.013206	-0.02805	0.439167	0.22324	8,362846*	2.4628	1.74769	0.118644	0.043071	0.036848	0.743828	0.116906	-0.07272	0.182193	0.099104	0.857797	0.194725	0.247852	0.643893	1.37981	0.288937	-0.06261	0.080341	0.736851	0.231443	0.77466	0.366308	0.32377	6,526729*	-0.02429	0.102447	1.06437	0.017835
7.4	1.94663	2.44772	1.6841	0.185127	1.08913	6,112033*	0.27298	0.795133	1.74942	1.47622	0.012294	-0.04165	-0.00651	0.798538	0.101697	0.468632	0.056942	-0.11055	0.402843	0.200757	8,021227*	2.40822	1.82962	0.120566	0.10535	-0.00573	0.792625	0.174704	0.144679	0.172358	0.123278	0.787303	0.23242	0.254924	0.544625	1.40164	0.208549	-0.0722	0.066237	0.743039	0.155581	0.701967	0.36182	0.293443	6,372584*	0.020174	0.066731	1.14859	0.021308
7.6	1.93062	2.50427	1.61153	0.175009	1.11904	6,095416*	0.342049	0.804466	1.7946	1.41965	0.092983	0.045349	-0.01436	0.760386	0.109326	0.412381	0.065271	-0.01273	0.425269	0.202383	8,401032*	2.21471	1.61338	0.106195	0.075968	-0.01335	0.803586	0.193222	0.129471	0.099121	0.116521	0.766202	0.228165	0.229713	0.580081	1.37325	0.261066	-0.03215	0.079453	0.709463	0.154655	0.729319	0.381283	0.29308	6,327482*	0.012353	0.099184	1.16716	-0.00666
7.8	1.90751	2.55877	1.56467	0.137708	1.11336	6,162796*	0.379587	0.722572	1.78765	1.47342	0.067081	0.060732	0.009538	0.774408	0.09817	0.418327	0.011653	-0.10529	0.478544	0.163206	7,544527*	2.33875	1.54231	0.085679	-0.01258	-0.01536	0.800757	0.146379	0.082454	0.190973	0.111736	0.826445	0.209633	0.230174	0.556841	1.3337	0.243504	-0.08832	0.061593	0.740161	0.21465	0.690293	0.391204	0.305625	6,195867*	0.037221	0.089999	1.19028	0.009314
8	1.91858	2.49711	1.42833	0.1618	1.06876	6,141911*	0.427451	0.782645	1.79044	1.44363	0.130203	-0.03735	0.000942	0.771489	0.117848	0.385035	0.021581	-0.10549	0.473949	0.111057	7,477452*	2.23801	1.56467	0.068575	0.095359	-0.01129	0.755648	0.220766	0.132896	0.121397	0.126624	0.815934	0.196243	0.231798	0.629633	1.32729	0.252035	-0.05201	0.058553	0.723006	0.132658	0.683398	0.432464	0.305087	6,201713*	-0.0318	0.060467	1.23759	-0.00316
8.2	1.85572	2.40062	1.41917	0.167423	1.12925	6,18207*	0.356084	0.698483	1.8273	1.40178	0.155651	0.051936	0.01351	0.721333	0.107093	0.422787	-0.003	-0.10869	0.407342	0.091759	7,651449*	2.22185	1.69806	0.066963	0.089489	-0.02671	0.802747	0.094776	0.145465	0.097557	0.133697	0.86525	0.222113	0.256327	0.551457	1.3097	0.277527	-0.0903	0.048759	0.777335	0.141759	0.610833	0.338477	0.324806	6,067218*	0.005285	0.091223	1.26279	-0.00736
8.4	1.88183	2.39788	1.43633	0.182702	1.11647	5,823882*	0.255069	0.758918	1.7608	1.38291	0.034883	-0.06985	-0.00282	0.70706	0.099197	0.432218	0.002543	-0.1056	0.386217	0.106727	7,194076*	2.1737	1.83475	0.098393	0.124151	-0.00793	0.731771	0.187863	0.163557	0.120769	0.119873	0.789045	0.208199	0.248107	0.613201	1.36314	0.239077	-0.07923	0.067542	0.731488	0.132145	0.567627	0.367195	0.285491	6,044411*	0.066892	0.081736	1.30258	-0.01916
8.6	1.84028	2.38259	1.45271	0.146454	1.07567	5,845922*	0.347613	0.5716	1.90775	1.39508	0.12668	-0.03916	-0.00065	0.720102	0.113062	0.551384	0.010882	-0.17727	0.415159	0.125837	7,31853*	2.06918	1.60919	0.110191	0.003258	-0.02156	0.839105	0.135589	0.112116	0.086259	0.089015	0.778242	0.207728	0.249187	0.615047	1.34034	0.244512	0.006458	0.046461	0.72317	0.158583	0.511192	0.347546	0.295521	5,924979*	0.014925	0.091735	1.35083	0.034647
8.8	1.81352	2.40226	1.41709	0.168482	1.06648	5,843452*	0.382411	0.593257	1.94172	1.36784	0.144287	0.021189	-0.02137	0.669408	0.122624	0.438267	-0.00375	-0.21143	0.397787	0.149975	7,220042*	2.45694	1.48342	0.101919	0.040611	-0.04393	0.935939	0.107802	0.085469	0.066334	0.094593	0.955654	0.225289	0.245767	0.538319	1.30857	0.250079	-0.10413	0.044605	0.754853	0.134968	0.529968	0.322142	0.322783	5,861678*	0.018742	0.140133	1.33549	0.031362
9	1.81472	2.30247	1.37968	0.186284	0.985602	5,556778*	0.411229	0.852019	2.02965	1.36439	0.095303	-0.05629	0.000691	0.708489	0.10421	0.442737	-0.00788	-0.25344	0.42327	0.202182	7,175945*	2.31094	1.52459	0.101377	-0.13277	0.003162	0.926084	0.153312	0.099792	0.057842	0.091215	0.948246	0.241169	0.254859	0.545104	1.27761	0.240193	-0.0159	0.053276	0.721592	0.175431	0.539901	0.345793	0.283012	6,025679*	-0.00585	0.066825	1.47503	0.010275
9.2	1.74668	2.28059	1.2668	0.179262	1.06855	5,589931*	0.490569	0.936279	1.9508	1.35989	0.051367	-0.00557	-0.01702	0.691902	0.097509	0.36726	0.003432	-0.17253	0.447118	0.196252	7,39145*	2.37503	1.5244	0.102386	-0.08826	0.024621	0.825459	0.132127	-0.01373	0.086085	0.108719	0.848804	0.235414	0.24624	0.574277	1.23249	0.242418	-0.00386	0.025517	0.745757	0.171534	0.475962	0.342893	0.287855	5,840962*	0.029081	0.091483	1.47369	0.072491
9.4	1.80169	2.20965	1.21018	0.164995	1.03937	5,003*	0.304095	0.885407	2.00222	1.38252	0.027115	-0.0625	2.6e-05	0.696514	0.120001	0.44781	0.037547	-0.19787	0.356118	0.221391	6,429749*	2.3544	1.35449	0.104004	-0.14533	-0.01651	0.827404	0.120574	-0.07913	0.091243	0.096783	0.840969	0.243993	0.209427	0.576052	1.27732	0.236782	-0.14418	0.030991	0.705871	0.130791	0.512264	0.31008	0.285165	5,760785*	0.010002	0.049305	1.57992	0.016718
9.6	1.75669	2.20673	1.29584	0.212751	1.04085	4,977256*	0.223067	0.804598	2.12948	1.37991	0.073772	-0.03524	-0.02679	0.681332	0.119834	0.406824	0.03376	-0.16734	0.34157	0.201289	6,519139*	2.45664	1.46727	0.115742	-0.12655	-0.02466	0.842846	0.086361	-0.14855	0.114194	0.102242	0.843667	0.227945	0.232706	0.606381	1.27771	0.238353	-0.13447	0.026989	0.705397	0.084067	0.510602	0.301942	0.274682	5,797417*	0.01248	0.085058	1.50015	0.012271
9.8	1.76296	2.26697	1.39218	0.1697	1.03709	4,99253*	0.211745	0.863882	2.12394	1.34146	0.115987	-0.07238	-0.05077	0.685151	0.12635	0.427442	-0.02992	-0.15422	0.311158	0.172793	6,08906*	2.27122	1.43155	0.107738	-0.19657	-0.00433	0.78181	0.08357	-0.18647	0.089566	0.089279	0.834078	0.256676	0.232451	0.627029	1.28639	0.179639	-0.05812	0.007383	0.706331	0.087668	0.562512	0.410016	0.27608	5,794111*	0.047573	0.137536	1.47629	0.002203
10	1.73701	2.26104	1.34051	0.170894	0.984683	4,878843*	0.219994	0.925336	2.2319	1.36348	0.033786	-0.06016	-0.03342	0.687978	0.131114	0.416599	0.014589	-0.24153	0.351816	0.178704	6,395681*	2.23011	1.48434	0.093936	-0.14546	0.006427	0.826295	0.117547	-0.26448	0.116179	0.101746	0.902437	0.219958	0.238669	0.579287	1.25522	0.159975	-0.12922	-0.01352	0.726162	0.117732	0.455682	0.308627	0.296563	5,955167*	0.041318	0.063072	1.40283	0.004775
10.2	1.67778	2.2433	1.35038	0.159477	0.917501	4,634718*	0.19901	0.902923	2.29428	1.33586	0.039648	0.036795	-0.07131	0.673259	0.122467	0.400209	-0.00215	-0.28761	0.27472	0.179039	5,908621*	2.32607	1.47092	0.08639	-0.10419	0.017615	0.813303	0.118923	-0.13051	0.126555	0.09422	0.892792	0.214437	0.254803	0.615117	1.32111	0.179554	0.022469	-0.01251	0.7202	0.183599	0.461091	0.381505	0.289687	5,477693*	0.027528	0.098695	1.49608	-0.00456
10.4	1.71401	2.18113	1.33025	0.198177	0.980867	4,704675*	0.24657	0.80956	2.13031	1.3788	0.061416	-0.08583	-0.05356	0.658719	0.134988	0.392729	0.055599	-0.31919	0.206168	0.180349	5,950991*	2.19433	1.38267	0.10186	-0.24443	-0.0301	0.844389	0.124524	0.042598	0.165723	0.102476	0.900526	0.212366	0.223495	0.622918	1.32892	0.175019	-0.11161	-0.0057	0.722042	0.080489	0.448177	0.314841	0.27867	5,510527*	0.053056	0.106284	1.40409	-0.03287
10.6	1.70923	2.16449	1.27415	0.170668	0.954221	4,052485*	0.195771	0.912749	2.10419	1.30082	0.014068	-0.06717	-0.04994	0.631921	0.138963	0.394076	0.005183	-0.27023	0.184536	0.160783	5,785096*	2.07465	1.51886	0.097966	-0.17128	0.005937	0.855989	0.139312	-0.01094	0.174583	0.113801	0.803378	0.240374	0.239034	0.578107	1.30388	0.158727	-0.05702	-0.00956	0.73949	0.105644	0.482571	0.325914	0.283727	5,525248*	-0.00307	0.070085	1.4295	-0.0407
10.8	1.76764	2.17571	1.25936	0.184672	0.979127	4,165903*	0.282641	0.791781	2.03675	1.33798	0.061403	-0.03925	-0.06667	0.578071	0.133693	0.317624	0.0069	-0.31955	0.179494	0.196102	5,8015*	2.11473	1.67675	0.132637	-0.11692	0.063846	0.84857	0.100643	0.028849	0.069982	0.103405	0.817935	0.238134	0.213223	0.52852	1.37987	0.174873	-0.07599	0.013517	0.76287	0.003958	0.518391	0.317761	0.263406	5,757415*	0.019841	0.097091	1.38934	-0.05944
11	1.77525	2.17085	1.28311	0.19848	0.982889	4,250464*	0.288233	0.902989	2.15413	1.28945	0.052261	-0.0866	-0.0552	0.483296	0.154616	0.383892	0.029174	-0.29249	0.244781	0.16825	5,771083*	2.12027	1.55786	0.149621	-0.24191	-5.1e-06	0.824847	0.145795	-0.04106	0.02845	0.104566	0.852975	0.248019	0.222468	0.513665	1.3609	0.148649	-0.13325	0.003612	0.739331	0.031571	0.439827	0.343638	0.275064	5,57035*	-0.02257	0.091791	1.44362	-0.04577
11.2	1.70939	2.14443	1.21125	0.147439	1.00967	4,196936*	0.219524	0.750801	2.08643	1.34115	0.060746	-0.07882	-0.06217	0.50326	0.165405	0.303464	0.01375	-0.31476	0.245385	0.157257	5,71915*	2.11742	1.50442	0.162035	-0.20878	0.055556	0.711324	0.157086	0.097629	0.079945	0.117597	0.717021	0.24443	0.202128	0.570154	1.29086	0.093669	-0.08028	0.031402	0.740183	0.069179	0.431821	0.286008	0.259838	5,645172*	0.010355	0.075186	1.39144	-0.04441
11.4	1.70748	2.18007	1.29578	0.145034	1.06431	4,127301*	0.213876	0.800227	1.97783	1.32508	0.081843	-0.06857	-0.05828	0.517832	0.167149	0.338456	0.018239	-0.24943	0.252098	0.123073	5,073235*	2.04002	1.63581	0.143714	-0.243	-0.02579	0.597555	0.123643	-0.02145	0.128727	0.108434	0.767596	0.237278	0.220924	0.427057	1.32331	0.101253	-0.0448	0.026893	0.762748	0.019491	0.423097	0.310438	0.287133	5,435407*	0.128551	0.105831	1.33389	-0.05335
11.6	1.69587	2.17467	1.13789	0.173582	0.947187	4,165823*	0.322339	0.899275	1.90252	1.32749	0.042527	-0.05	-0.06541	0.601244	0.174083	0.20185	0.01771	-0.25932	0.159713	0.187749	4,979927*	1.88842	1.54031	0.160322	-0.26805	0.006977	0.505986	0.124054	0.052497	0.076063	0.100118	0.822972	0.205753	0.211328	0.465585	1.37137	0.112478	-0.13553	0.008418	0.712306	0.047618	0.521558	0.320424	0.275054	5,482515*	-0.03135	0.131453	1.37654	-0.04264
11.8	1.68188	2.14142	1.11271	0.154923	0.981	3,981427*	0.273561	0.859741	1.94947	1.26078	0.094541	-0.10708	-0.07501	0.663408	0.17082	0.195773	0.033162	-0.18466	0.294329	0.104081	5,038568*	2.02945	1.49032	0.182624	-0.26717	-0.01107	0.438154	0.127831	-0.01332	0.141502	0.093343	0.755827	0.212461	0.218941	0.491091	1.34861	0.055311	-0.13105	0.01786	0.71367	0.037973	0.490036	0.350044	0.264691	5,53854*	0.023845	0.086493	1.37319	-0.06166
12	1.70233	2.1437	1.2689	0.180557	0.968181	4,015117*	0.215537	0.921359	2.02395	1.27981	0.006629	-0.10757	-0.07457	0.706809	0.164026	0.216271	0.054849	-0.23397	0.294578	0.089144	4,724311*	2.03373	1.28988	0.169356	-0.27715	0.003688	0.446056	0.221501	0.084142	0.139244	0.120113	0.787404	0.222302	0.198219	0.486443	1.31936	0.062125	-0.15319	0.00592	0.699246	-0.02663	0.385605	0.315292	0.256682	5,531798*	0.062642	0.10245	1.34665	-0.07173
12.2	1.70262	2.03348	1.14277	0.14985	0.989797	3,50829*	0.233697	0.780608	1.98507	1.2517	0.002646	-0.0381	-0.0724	0.690539	0.15186	0.205743	0.002498	-0.19605	0.330627	0.162664	4,724311*	1.98429	1.29134	0.158236	-0.18899	-0.04256	0.520528	0.177484	-0.03056	0.131754	0.112928	0.776106	0.231947	0.204983	0.535539	1.35868	0.088865	-0.09694	-0.00507	0.703952	0.068464	0.461288	0.326508	0.264157	5,348852*	-0.00685	0.079232	1.35859	-0.05099
12.4	1.67538	1.98336	1.12312	0.159139	0.965451	3,728899*	0.230901	0.95179	2.05879	1.30007	0.00586	-0.07644	-0.06593	0.720547	0.176285	0.13534	0.025186	-0.2526	0.334289	0.169917	4,728959*	1.91753	1.4528	0.163553	-0.20715	-0.01434	0.549838	0.136815	0.088599	0.12284	0.116521	0.711715	0.237647	0.169605	0.458286	1.31575	0.109352	-0.14291	0.007224	0.675311	0.120104	0.514211	0.32857	0.266346	5,437754*	-0.0027	0.100166	1.39198	-0.05737
12.6	1.69763	2.01654	1.07191	0.17997	1.04066	3,712605*	0.175147	0.896285	1.93154	1.25142	0.064794	-0.08539	-0.0712	0.723853	0.184376	0.112074	0.014786	-0.18434	0.372941	0.15024	4,469757*	1.87572	1.41717	0.142815	-0.17387	-0.02212	0.516184	0.186156	0.010412	0.235198	0.117444	0.738785	0.231916	0.166665	0.399356	1.33229	0.084776	-0.11044	-0.0166	0.667575	0.100114	0.428821	0.266945	0.281568	5,305158*	0.055207	0.141682	1.30979	-0.06076
12.8	1.69388	1.95757	1.20362	0.16573	0.995359	3,932543*	0.140516	0.830428	1.98675	1.21012	0.035205	-0.08997	-0.08519	0.722372	0.194845	0.12656	0.022411	-0.21877	0.340872	0.101307	4,236122*	1.97307	1.58761	0.157181	-0.14784	-0.11401	0.403506	0.132335	0.015181	0.075555	0.120145	0.720798	0.194349	0.182165	0.447495	1.30083	0.085816	-0.04685	-0.0069	0.674256	0.086758	0.402925	0.264411	0.236833	5,562435*	0.039013	0.104845	1.30913	-0.07974
13	1.663	1.98178	1.25456	0.135323	1.08846	3,908168*	0.162303	0.854253	1.86132	1.17346	-0.08163	-0.07119	-0.07413	0.72261	0.203287	0.047543	-0.00027	-0.16297	0.340015	0.130463	4,816157*	1.77604	1.53107	0.138251	-0.16934	-0.02865	0.322753	0.14265	0.039091	0.094718	0.110597	0.778085	0.213808	0.167319	0.470864	1.30128	0.022043	-0.12564	0.01066	0.712523	0.056423	0.49399	0.251441	0.25551	5,380577*	0.001415	0.107303	1.31143	-0.05162
13.2	1.6523	2.0419	1.15754	0.171848	1.07481	3,922073*	0.069066	0.808377	1.85962	1.20188	-0.00429	-0.07011	-0.06796	0.72356	0.205567	0.093147	0.028265	-0.16609	0.26438	0.135475	4,633659*	1.77858	1.31651	0.106545	-0.16259	-0.01189	0.317902	0.092359	0.017525	0.100364	0.12878	0.675754	0.220587	0.176408	0.430853	1.30946	0.056305	-0.18431	-0.01186	0.704127	0.050076	0.48264	0.239916	0.259984	5,257027*	-0.01948	0.102708	1.25048	-0.09392
13.4	1.65227	2.06308	1.05588	0.151871	0.985528	3,489606*	0.006973	0.848207	1.80193	1.1885	-0.01678	-0.09451	-0.08011	0.688577	0.204492	0.157854	0.010936	-0.16891	0.277518	0.12635	4,841194*	1.8639	1.09462	0.122376	-0.19987	-0.07622	0.274938	0.152063	0.044745	0.088644	0.132905	0.689772	0.257126	0.209489	0.428914	1.26899	0.014713	-0.12167	-0.00828	0.706639	0.048279	0.310945	0.258699	0.243499	5,33571*	-0.01636	0.070259	1.24169	-0.11507
13.6	1.6637	2.00858	1.0994	0.158458	0.895087	3,434548*	0.08778	0.919585	1.78643	1.16675	-0.09253	-0.08921	-0.1032	0.705634	0.202232	0.156126	0.031714	-0.20237	0.308095	0.126421	5,188458*	1.72343	1.31834	0.096767	-0.15595	-0.03242	0.141451	0.092245	-0.12167	0.041412	0.142465	0.678778	0.228696	0.196739	0.407169	1.22676	0.026385	-0.19029	-0.00529	0.715072	0.068285	0.33573	0.264733	0.256837	5,35634*	-0.06269	0.122613	1.21037	-0.07654
13.8	1.656	1.98922	1.04348	0.164704	0.850115	3,49519*	0.122356	0.7136	1.82972	1.20035	-0.10464	-0.10877	-0.09647	0.71841	0.205637	0.137552	0.053708	-0.21309	0.289285	0.094733	5,137853*	1.87743	1.26405	0.09691	-0.2119	-0.01471	0.169785	0.13951	-0.19909	0.089159	0.130009	0.717662	0.26011	0.214298	0.472277	1.21604	0.07419	-0.07949	-0.02282	0.703046	0.12453	0.324882	0.293824	0.26541	5,09757*	0.004706	0.106163	1.35172	-0.05083
14	1.67898	1.95727	1.09021	0.140565	0.926171	3,375597*	0.119338	0.825301	1.86024	1.19332	-0.05979	-0.09986	-0.11245	0.697532	0.194048	0.13337	0.034914	-0.21857	0.297345	0.065073	4,688449*	1.87482	1.12812	0.118363	-0.20575	-0.02785	0.124101	0.102112	-0.21767	0.07498	0.131072	0.657689	0.264396	0.194026	0.424278	1.25229	0.034323	-0.15737	-0.01534	0.729138	0.110202	0.312854	0.293488	0.260962	5,339336*	-0.01359	0.123491	1.24366	-0.07574
14.2	1.64822	1.92646	0.966071	0.182631	0.881736	3,381825*	0.000467	0.932105	1.69783	1.15996	-0.10817	-0.0134	-0.12147	0.665943	0.210197	0.195355	0.032602	-0.27942	0.268522	0.073047	3,9993*	1.62654	1.45571	0.123898	-0.1892	0.039318	0.157677	0.065621	-0.30255	-0.00924	0.12215	0.621616	0.270018	0.196324	0.433375	1.17612	0.039959	-0.13881	-0.02694	0.734073	0.079314	0.365512	0.235013	0.251719	5,032434*	-0.01083	0.108351	1.22539	-0.06524
14.4	1.6371	1.89288	0.987244	0.16888	0.935747	3,331062*	0.009353	0.741665	1.8744	1.14564	-0.06907	-0.09958	-0.11962	0.6575	0.207374	0.110857	0.007925	-0.25066	0.358574	0.075132	4,261292*	1.72276	1.26713	0.11964	-0.22146	-0.05165	0.139136	0.096873	-0.326	0.056372	0.131583	0.60427	0.241561	0.170467	0.409925	1.15006	0.035686	-0.11869	-0.04413	0.719634	0.062109	0.333626	0.244984	0.270195	5,025266*	0.01278	0.077908	1.29498	-0.06263
14.6	1.6689	1.88616	0.973956	0.116385	0.93542	3,315277*	0.023942	0.926584	1.80498	1.17795	-0.12031	-0.06985	-0.13026	0.653	0.207315	0.128725	0.006936	-0.2405	0.348552	0.059692	4,73394*	1.6799	1.50748	0.089233	-0.15289	-0.03709	0.169115	0.083679	-0.27865	0.025456	0.142201	0.587588	0.274555	0.204015	0.278308	1.22264	0.105495	-0.15023	-0.03231	0.787028	0.101568	0.298002	0.28517	0.254325	4,917162*	-0.04052	0.124609	1.22173	-0.10237
14.8	1.67399	1.85884	0.995678	0.179258	0.891171	3,272567*	0.107435	0.722769	1.87159	1.112	-0.09472	-0.13235	-0.14414	0.648405	0.220079	0.109119	0.012432	-0.33378	0.342011	0.120427	4,740581*	1.8438	1.49946	0.0985	-0.20157	-0.05772	0.210179	0.123864	-0.35484	0.045127	0.12872	0.637702	0.240729	0.201947	0.324298	1.20732	0.018255	-0.18769	-0.03277	0.75941	0.055668	0.185496	0.283667	0.251162	4,830308*	0.016457	0.125415	1.19111	-0.10233
15	1.67249	1.8614	1.03955	0.154117	0.864116	2,998081*	0.184006	1.10358	2.00813	1.11501	-0.01859	-0.10647	-0.13862	0.658608	0.213311	0.190672	0.061401	-0.26605	0.283602	0.076175	4,774053*	1.84176	1.27918	0.091624	-0.21109	-0.09856	0.193712	0.142058	-0.31297	0.035051	0.134082	0.604304	0.241879	0.191396	0.330651	1.22394	0.044863	-0.11959	-0.0413	0.751518	0.015501	0.243751	0.237668	0.27565	4,875623*	0.027502	0.128018	1.20263	-0.15142
15.2	1.59452	1.75446	0.920194	0.15211	0.782166	2,488623*	0.049245	0.911435	1.78704	1.04095	-0.11527	-0.08003	-0.10668	0.595172	0.222507	0.050043	-0.00915	-0.31205	0.329611	0.085551	3,975923*	1.76167	1.1202	0.118044	-0.27658	-0.05257	0.193581	0.120826	-0.35461	-0.0043	0.114676	0.556888	0.247772	0.163638	0.330102	1.15783	-0.04721	-0.14046	-0.0657	0.682065	-0.0827	0.178789	0.22104	0.26902	5,036616*	0.003267	0.119454	1.02863	-0.14297
15.4	1.33959	0.970971	0.392425	0.02329	0.413191	1,37551*	0.005976	0.323387	1.22371	0.6461	-0.26087	-0.22153	-0.16842	0.299328	0.118126	-0.17359	-0.03121	-0.46235	0.128963	-0.05154	1,696891*	0.861049	0.371741	-0.00851	-0.27045	-0.12118	0.128602	0.039288	-0.35292	-0.09593	0.06356	0.283857	0.16761	0.046307	0.024207	0.923819	-0.1631	-0.16241	-0.1388	0.385105	-0.14748	-0.03033	0.035586	0.204421	3,200004*	0.034123	0.071716	0.825732	-0.20393
15.6	1.18089	0.399578	0.157265	0.034033	0.149353	0,732043*	-0.14625	0.092492	1.16246	0.283777	-0.39535	-0.26904	-0.19744	0.141934	0.101694	-0.30948	-0.01044	-0.57242	0.018617	-0.12412	0,660545*	0.139352	-0.02027	-0.02429	-0.30485	-0.15721	0.095009	-0.02191	-0.23947	-0.14837	0.039044	-0.06283	0.120767	-0.04277	-0.23578	0.785823	-0.2873	-0.28401	-0.17423	0.206883	-0.28051	-0.11698	-0.1269	0.16497	1,763676*	-0.01951	0.077212	0.718129	-0.27068
15.8	1.12742	0.165327	0.016495	0.001876	0.036631	0,167501*	-0.21374	-0.22805	0.89817	0.152678	-0.38708	-0.32448	-0.19728	0.004572	0.023492	-0.39279	-0.0404	-0.63209	-0.12695	-0.21137	0,304714*	-0.22385	-0.1369	-0.02894	-0.30834	-0.15139	0.05349	-0.0688	-0.13254	-0.12517	0.006299	-0.29232	0.076732	-0.05933	-0.36948	0.716816	-0.26798	-0.23363	-0.2133	0.111716	-0.38074	-0.23199	-0.1952	0.124143	1,148656*	-0.03438	0.027581	0.646445	-0.30965
16	1.13359	0.059501	-0.04908	0.021456	-0.07616	0,091154*	-0.25148	-0.35862	0.850408	0.040185	-0.36205	-0.30114	-0.20631	-0.09376	-0.03359	-0.40885	-0.02563	-0.64667	-0.14915	-0.29327	-0,10272*	-0.2092	-0.02027	-0.01991	-0.3369	-0.12158	0.059155	-0.04213	-0.13482	-0.18404	-0.00534	-0.23699	0.063883	-0.08813	-0.48806	0.742617	-0.28708	-0.22174	-0.21622	0.007683	-0.33151	-0.25599	-0.18845	0.110808	0,355575*	-0.01888	0.033377	0.674667	-0.35346
16.2	1.086	-0.00121	-0.15773	0.008443	-0.08676	-0,04463*	-0.24779	-0.32677	0.694669	-0.02818	-0.42696	-0.30587	-0.21031	-0.10554	-0.06723	-0.4179	-0.0167	-0.73164	-0.15977	-0.23374	-0,1154*	-0.34285	-0.20081	0.015914	-0.34499	-0.17909	0.072945	-0.0865	-0.11599	-0.09541	0.005709	-0.07563	-0.00124	-0.13958	-0.50572	0.770862	-0.34693	-0.21648	-0.20526	-0.05161	-0.32808	-0.33954	-0.16312	0.1167	0,372878*	0.016044	0.026426	0.57497	-0.36856
16.4	1.06529	-0.0334	-0.23485	-0.02121	-0.09061	-0,18441*	-0.38571	-0.49628	0.574479	-0.05855	-0.37555	-0.30091	-0.25986	-0.1087	-0.11013	-0.40408	0.000796	-0.71479	-0.13008	-0.19237	-0,31689*	-0.42479	-0.15965	0.004952	-0.33336	-0.13799	0.120189	-0.04701	-0.12648	-0.19877	-0.01208	-0.17868	-0.00877	-0.09902	-0.54387	0.730563	-0.35872	-0.25567	-0.21872	-0.0938	-0.2721	-0.4335	-0.20173	0.108746	0,063778*	-0.03288	-0.02668	0.599343	-0.37347
16.6	1.15732	-0.08403	-0.1885	-0.01862	-0.11634	-0,18937*	-0.52944	-0.45697	0.565555	-0.06081	-0.35393	-0.31995	-0.23919	-0.09651	-0.1539	-0.4345	-0.02787	-0.74855	-0.14736	-0.18167	-0,40628*	-0.49281	-0.22948	0.008468	-0.37372	-0.16505	0.054072	-0.06101	-0.2301	-0.09469	-0.00388	-0.23696	0.005007	-0.09819	-0.552	0.717019	-0.31421	-0.26503	-0.23037	-0.0867	-0.37821	-0.41393	-0.13471	0.106496	-0,00076*	0.009935	-0.0192	0.609932	-0.41932
16.8	1.11851	-0.05204	-0.22699	-0.02818	-0.12287	-0,29157*	-0.50026	-0.41057	0.548944	-0.08003	-0.32221	-0.31618	-0.24884	-0.0569	-0.17329	-0.47326	-0.03885	-0.75673	-0.0977	-0.23215	-0,44347*	-0.41693	-0.27543	-0.01684	-0.2813	-0.15024	0.107382	-0.02642	-0.23711	-0.18698	0.001564	-0.2984	0.015312	-0.11901	-0.52137	0.707885	-0.33655	-0.269	-0.22742	-0.09143	-0.27231	-0.38467	-0.25507	0.089296	0,059703*	0.008683	0.006102	0.593007	-0.41199
17	1.09959	-0.03568	-0.31477	0.00679	-0.13823	-0,18161*	-0.45412	-0.3571	0.502901	-0.0691	-0.35197	-0.35503	-0.24091	-0.0402	-0.16042	-0.4794	-0.05833	-0.73404	-0.10378	-0.17952	-0,53452*	-0.34309	-0.20366	-0.04508	-0.38825	-0.19758	0.107366	-0.03698	-0.23103	-0.24394	-0.02597	-0.31145	-0.01558	-0.08184	-0.52501	0.690423	-0.40743	-0.19468	-0.23527	-0.06975	-0.3492	-0.36374	-0.20876	0.089461	-0,31492*	-0.03233	0.018669	0.555122	-0.39052
17.2	1.09582	-0.00174	-0.24932	0.025581	-0.12596	-0,23259*	-0.5071	-0.42	0.573075	-0.06437	-0.31339	-0.2637	-0.25034	-0.06575	-0.14009	-0.51769	-0.05008	-0.75391	-0.01836	-0.20933	-0,48711*	-0.38282	-0.24627	-0.04646	-0.38983	-0.21499	0.107173	-0.0393	-0.22856	-0.22875	-0.02727	-0.25051	-0.00777	-0.10464	-0.60086	0.702053	-0.42897	-0.26645	-0.22754	-0.07577	-0.29387	-0.41841	-0.215	0.077146	-0,16064*	-0.01039	-0.0025	0.52149	-0.38764
17.4	1.13068	-0.02284	-0.29278	0.008322	-0.07939	-0,27278*	-0.55715	-0.58912	0.616328	-0.10083	-0.32514	-0.30935	-0.19722	-0.08536	-0.11496	-0.50153	0.016627	-0.77241	-0.0276	-0.19566	-0,45012*	-0.29307	-0.20935	-0.0847	-0.34396	-0.23879	0.149244	-0.05902	-0.22913	-0.19625	-0.01508	-0.28465	-0.01801	-0.1162	-0.62898	0.691157	-0.38389	-0.19034	-0.21505	-0.07411	-0.39178	-0.41707	-0.17476	0.085773	-0,36057*	-0.01339	0.003356	0.447622	-0.37015
17.6	1.11859	-0.00948	-0.32216	-0.02034	-0.06763	-0,23042*	-0.56828	-0.51274	0.468294	-0.06302	-0.31275	-0.29272	-0.20756	-0.08472	-0.11118	-0.4667	0.029148	-0.79416	0.001463	-0.24908	-0,54542*	-0.48784	-0.14246	-0.10304	-0.37485	-0.19331	0.157154	-0.02185	-0.18113	-0.21063	-0.02108	-0.2986	-0.00905	-0.10643	-0.6665	0.762512	-0.37344	-0.1803	-0.22498	-0.07135	-0.30551	-0.48306	-0.23735	0.094744	-0,22885*	-0.02543	0.005892	0.512076	-0.36148
17.8	1.09941	0.00027	-0.24542	-0.00747	-0.02381	-0,41436*	-0.59203	-0.49651	0.616735	-0.10177	-0.27112	-0.3349	-0.21674	-0.07468	-0.01163	-0.48934	0.0133	-0.78163	0.07634	-0.15619	-0,45277*	-0.24604	-0.18979	-0.08591	-0.35146	-0.17368	0.166408	-0.01184	-0.22218	-0.14526	-0.0196	-0.32598	-0.02371	-0.08765	-0.69882	0.732573	-0.41557	-0.20234	-0.22048	-0.05933	-0.4278	-0.36338	-0.21519	0.072704	-0,46936*	-0.01664	-0.07135	0.429095	-0.36041
18	1.17348	-0.05291	-0.31678	-0.02815	0.004945	-0,38727*	-0.63029	-0.51787	0.665494	-0.0991	-0.23482	-0.3856	-0.20312	-0.07101	-0.00211	-0.46496	0.025128	-0.82935	0.024826	-0.13755	-0,65001*	-0.10679	-0.17269	-0.05052	-0.3396	-0.22128	0.157306	-0.01454	-0.24067	-0.14241	-0.00374	-0.33596	-0.04603	-0.10583	-0.67209	0.748025	-0.39557	-0.2825	-0.21967	-0.10585	-0.27626	-0.40028	-0.15962	0.108885	-0,32074*	-0.04638	-0.03608	0.356663	-0.37165
18.2	1.15082	0.005104	-0.28252	-0.02963	-0.04875	-0,33492*	-0.56801	-0.56161	0.54063	-0.16062	-0.28553	-0.29782	-0.2451	-0.00492	0.024659	-0.49909	-0.02851	-0.78725	0.123483	-0.11574	-0,53711*	0.075001	-0.15435	-0.02398	-0.30617	-0.27801	0.153493	0.020781	-0.23214	-0.16992	-0.01561	-0.28975	-0.04451	-0.08852	-0.70379	0.696464	-0.40506	-0.22292	-0.23377	-0.0477	-0.38046	-0.39506	-0.18722	0.081183	-0,13948*	-0.0086	-0.03108	0.411484	-0.39947
18.4	1.15621	0.017092	-0.27461	-0.04581	-0.0201	-0,24357*	-0.53575	-0.50693	0.56755	-0.1676	-0.30321	-0.35303	-0.24398	-0.02236	0.029744	-0.5148	-0.02711	-0.80283	0.133927	-0.15422	-0,32261*	0.01764	-0.24933	-0.04394	-0.32969	-0.26669	0.159819	0.017208	-0.23146	-0.17551	-0.01761	-0.31208	-0.0567	-0.01623	-0.69058	0.708562	-0.40583	-0.29825	-0.23156	-0.02496	-0.33355	-0.35476	-0.19527	0.066067	-0,11857*	-0.04092	-0.02978	0.364548	-0.38692
18.6	1.13858	0.031929	-0.30877	-0.01097	-0.01417	-0,28344*	-0.57224	-0.56437	0.491852	-0.18539	-0.24767	-0.36138	-0.20716	0.007136	0.004887	-0.49627	0.018351	-0.71371	0.074693	-0.17567	-0,30448*	0.150642	-0.2035	-0.03529	-0.3054	-0.2244	0.174347	0.052285	-0.34861	-0.18543	-0.02551	-0.33146	-0.05051	-0.06297	-0.64441	0.772347	-0.40113	-0.18354	-0.22637	-0.00613	-0.40222	-0.4481	-0.21199	0.044526	0,011294*	-0.00709	-0.07069	0.364142	-0.39851
18.8	1.06838	0.040779	-0.29155	-0.0303	-0.05359	-0,43769*	-0.64942	-0.55316	0.600753	-0.18471	-0.30859	-0.3747	-0.2129	0.003124	-0.02005	-0.50285	-0.01636	-0.67516	0.089693	-0.14138	-0,73143*	0.025391	-0.23564	-0.06066	-0.37474	-0.2825	0.195824	0.050231	-0.377	-0.11404	-0.00801	-0.34537	-0.03427	-0.05707	-0.66034	0.770642	-0.40717	-0.196	-0.22076	0.005382	-0.32159	-0.40097	-0.22254	0.033477	-0,00592*	-0.02428	-0.01357	0.387901	-0.38348
19	1.04978	0.017527	-0.2643	0.002018	-0.03069	-0,30612*	-0.48786	-0.57873	0.633918	-0.18847	-0.22583	-0.36862	-0.22134	-0.01202	-0.00455	-0.4854	0.012538	-0.71177	0.106411	-0.19116	-0,13466*	-0.09923	-0.30931	-0.05209	-0.42085	-0.15147	0.22648	-0.00903	-0.36353	-0.18578	0.017214	-0.37888	-0.04378	-0.05789	-0.61252	0.804171	-0.38476	-0.13855	-0.19049	0.0026	-0.38385	-0.43768	-0.2037	0.048262	-0,10532*	0.008063	-0.04798	0.433235	-0.35515
19.2	1.13317	-0.01553	-0.28829	-0.02512	-0.00671	-0,3772*	-0.57166	-0.59641	0.516038	-0.17362	-0.28586	-0.35168	-0.29156	-0.01741	-0.03667	-0.47076	0.026009	-0.63714	0.112526	-0.19976	-0,37388*	-0.05852	-0.30035	-0.03367	-0.40227	-0.21936	0.25433	0.024107	-0.48948	-0.17702	-0.01612	-0.42731	-0.03833	-0.03431	-0.64685	0.776445	-0.44539	-0.23368	-0.20791	-0.00348	-0.3605	-0.39326	-0.25915	0.068703	-0,21718*	0.017356	-0.02514	0.303548	-0.34119
19.4	1.08711	-0.04356	-0.32416	-0.04012	-0.02501	-0,40236*	-0.54445	-0.62727	0.519216	-0.16018	-0.23955	-0.32898	-0.29976	-0.02625	-0.07493	-0.45345	0.020935	-0.52742	0.078556	-0.17326	-0,36152*	-0.17741	-0.32075	0.005758	-0.52067	-0.26726	0.274146	0.0528	-0.44019	-0.18334	-0.00427	-0.42732	-0.09181	-0.03796	-0.63145	0.744514	-0.44464	-0.14094	-0.20614	0.021122	-0.39646	-0.38355	-0.21153	0.073504	-0,09128*	0.003613	-0.0563	0.414428	-0.31767
19.6	1.08421	-0.03616	-0.29299	-0.04886	-0.00756	-0,25971*	-0.52069	-0.66332	0.381011	-0.16691	-0.34228	-0.29868	-0.27695	-0.00813	-0.09856	-0.46443	-0.01241	-0.54103	0.020003	-0.15275	-0,32261*	-0.25414	-0.36701	0.056264	-0.49416	-0.23145	0.292464	0.037081	-0.49514	-0.14892	-0.03626	-0.47279	-0.06864	-0.04859	-0.70272	0.850347	-0.4208	-0.19216	-0.2192	0.014279	-0.45258	-0.40262	-0.29687	0.098933	-0,30122*	-0.04634	-0.01921	0.429116	-0.28762
19.8	1.0843	-0.04328	-0.24857	-0.03019	-0.07067	-0,40394*	-0.48676	-0.61919	0.362608	-0.19141	-0.2703	-0.38542	-0.27635	-0.0215	-0.10918	-0.45098	0.019973	-0.47648	0.080113	-0.15494	-0,19105*	-0.11714	-0.33168	0.087804	-0.56233	-0.22181	0.288935	0.075336	-0.53149	-0.20935	-0.07309	-0.45877	-0.03843	-0.0686	-0.69347	0.768903	-0.37815	-0.17292	-0.20114	-0.00168	-0.35673	-0.32929	-0.2985	0.068751	-0,15356*	-0.00523	0.033847	0.494569	-0.28231
20	1.09683	-0.03282	-0.26838	-0.0038	-0.0415	-0,34647*	-0.45761	-0.65892	0.501626	-0.19161	-0.25554	-0.36476	-0.24016	0.033214	-0.01591	-0.49415	0.005917	-0.47536	0.061637	-0.17041	-0,3501*	-0.26009	-0.39293	0.108226	-0.58591	-0.16824	0.307476	0.032995	-0.48917	-0.22195	-0.07453	-0.42299	-0.09399	-0.03613	-0.68371	0.777874	-0.30116	-0.21028	-0.19388	0.008514	-0.32329	-0.37595	-0.28099	0.062244	-0,31457*	-0.0237	0.009648	0.39821	-0.2634
Mean signal sizes during stimulation
wild type	flwr-1	mca-3	mca-3; flwr-1
1.80583	0.983414	0.33907	0.472861
2.25797	3.029	0.212048	0.751378
1.34191	0.307661	0.252742	0.82826
0.164652	2.83804	1.38616	2.74805
1.01486	-0.0613546	0.443512	3.23244
	2.43529	0.126271	5.16198
0.270487		0.248778	5.68788
0.8714	0.492751	0.107042	3.00764
1.9366	0.541084	4.07763	0.374206
1.34413	0.458768	0.547587	0.756231
0.0512776	2.98068	0.535318	0.20645
-0.0345289	0.00558344	0.347995
-0.0351249	0.999199	0.304153	0.257861
0.684929	0.983037		1.115
0.135459	0.422597	1.9641	3.70211
0.337187	0.131242	0.53068	0.847561
0.0185221	0.884054	4.81808	0.0531754
-0.179078	1.62093	0.257767	1.10882
0.348401	6.16767		1.9919
0.169309	2.10209	1.76897	0.692826
	0.353116	0.602202	0.394476
2.16765	0.0168583	0.989493	6.41587
1.53565	1.7296	1.91592	1.18449
0.118092		0.233125	0.0117113
-0.100851	0.44873	0.451464	3.65817
-0.0103327	1.38004	0.510894	3.13438
0.66412	0.0621175	0.6263	2.51145
0.136573	-0.00788359	4.92518	0.154611
-0.00788359	5.88532	3.47311	0.136113
0.126536	0.651211	1.63372	1.69873
0.111189	6.05216	2.35293	0.595847
0.805446	0.0266635	3.33781	0.84177
0.229533	0.363915	1.5797	0.987083
0.22506	0.722863	1.1116	0.208171
0.545007	0.332899	0.527154	0.0748177
1.3402	-0.160317		-0.0908671
0.175363	0.126944	4.26356	0.363775
-0.0850393	0.177476	0.825378	0.980329
0.0296849	0.411352	1.08494	0.131973
0.728545	2.36252	0.581767	0.218477
0.11202	0.121023	2.2113	1.12658
0.535137	0.769536	0.255521	-0.0277663
0.336717	0.399611	0.366028	0.0528105
0.283007	0.00767546	1.15271	3.1635
	0.421499	0.434176	0.39056
0.0109829	0.935445
0.0961528	0.284745	0.378633
1.2999	0.699451	0.271597
-0.0192069	0.633124	0.830201
0.539849	3.80105	0.0832163
0.107029	0.323017	0.362381
0.0748318	3.76603	0.540698
-0.0206444	2.14092	3.95328
-0.0244599	0.613771	0.875171
0.174235	1.51977
-0.0210046	1.19812
0.366621	2.07078
1.40065	0.815541
0.109022	1.27079
1.28201	0.968329
0.365972
-0.0433854
0.00532141
0.0516622
0.552635
0.249928
0.474205
0.552635
0.168452
0.560548
0.044006
0.0515354
0.0542129
0.51092
0.0518795
0.198637
-0.163151
0.22726
0.192871
0.718879
1.21645
0.480617
0.408756
0.0567623
0.207093
0.957646
[truncated: 197 more columns]

## Sheet: Fig7D
Time (h)	wild type				flwr-1				mca-3				mca-3; flwr-1
0	1	1	1	1	1	1	1	1	1	1	1	1	1	1	1	1
0.5	1	1	1	1	1	1	1	1	1	1	1	1	1	1	1	1
1	1	0.933333	1	1	1	1	1	1	1	1	1	1	1	1	1	1
1.5	1	0.266667	0.533333	0.733333	1	0.933333	1	1	0.933333	1	0.933333	1	0.923077	1	1	1
2	0.533333	0.0666667	0.0666667	0.4	0.923077	0.666667	1	0.857143	0.333333	0.866667	0.733333	0.8	0.615385	1	0.933333	0.933333
2.5	0.2	0	0	0.133333	0.461538	0.466667	0.928571	0.642857	0.2	0.6	0.466667	0.466667	0.538462	0.642857	0.866667	0.8
3	0.0666667	0	0	0.0666667	0.384615	0.333333	0.785714	0.5	0.133333	0.2	0.2	0.266667	0.384615	0.428571	0.733333	0.6
3.5	0	0	0	0.0666667	0.307692	0.333333	0.642857	0.5	0.0666667	0.0666667	0.0666667	0.2	0.230769	0.357143	0.733333	0.4
4	0	0	0	0	0.230769	0.266667	0.428571	0.285714	0	0	0.0666667	0	0.153846	0.142857	0.466667	0.266667
4.5	0	0	0	0	0.230769	0.266667	0.285714	0.142857	0	0	0.0666667	0	0.0769231	0.142857	0.4	0.2
5	0	0	0	0	0.230769	0.2	0.285714	0.142857	0	0	0.0666667	0	0.0769231	0.142857	0.266667	0.0666667
5.5	0	0	0	0	0.153846	0.0666667	0.214286	0.142857	0	0	0.0666667	0	0.0769231	0.0714286	0.2	0.0666667
6	0	0	0	0	0.153846	0	0.0714286	0	0	0	0.0666667	0	0.0769231	0.0714286	0.0666667	0.0666667
