# Supplementary material for: Flower/FLWR-1 regulates neuronal activity via the plasma membrane Ca2+ ATPase to promote recycling of synaptic vesicles
Source: eLife. 2025 May 20;13:RP103870. doi: 10.7554/eLife.103870 (PMC12092002; doi:10.7554/eLife.103870)
Supplement: Figure 8—source data 1. [file elife-103870-fig8-data1.xlsx]

## Sheet: Fig8B
Time (h)	wild type			flwr-1			flwr-1 + pflwr-1:FLWR-1			flwr-1 + pflwr-1:FLWR-1(E74Q)			flwr-1 + pflwr-1:FLWR-1(R27A/K31A)
0	1	1	1	1	1	1	1	1	1	1	1	1	1	1	1
0.5	1	1	1	1	1	1	1	1	1	1	1	1	1	1	1
1	1	1	1	1	1	1	1	1	1	1	1	1	1	1	1
1.5	0.933333	0.533333	0.733333	1	1	0.933333	0.866667	0.866667	0.866667	1	0.933333	1	1	1	1
2	0.333333	0.133333	0.2	1	0.769231	0.666667	0.4	0.466667	0.333333	0.733333	0.533333	0.666667	0.866667	0.642857	0.666667
2.5	0.0666667	0	0.0666667	0.733333	0.769231	0.6	0.0666667	0.2	0.133333	0.4	0.333333	0.333333	0.666667	0.357143	0.4
3	0	0	0.0666667	0.533333	0.615385	0.466667	0	0.133333	0.0666667	0.2	0.266667	0.2	0.533333	0.214286	0.266667
3.5	0	0	0.0666667	0.466667	0.384615	0.4	0	0.0666667	0	0.0666667	0.133333	0.133333	0.466667	0.142857	0.2
4	0	0	0	0.333333	0.307692	0.266667	0	0.0666667	0	0	0.133333	0.133333	0.4	0.142857	0.133333
4.5	0	0	0	0.266667	0.230769	0.133333	0	0	0	0	0.0666667	0.133333	0.333333	0.0714286	0.133333
5	0	0	0	0.2	0.153846	0.0666667	0	0	0	0	0	0.0666667	0.2	0.0714286	0.0666667
5.5	0	0	0	0.0666667	0.0769231	0.0666667	0	0	0	0	0	0	0.2	0	0
6	0	0	0	0.0666667	0	0	0	0	0	0	0	0	0.2	0	0

## Sheet: Fig8D
wild type	-	+ CCs::FLWR-1	+ CCs::FLWR-1(E74Q)	+ CCs::FLWR-1(R27A/K31A))
69.36	-39.492	-32.301	108.035	28.588
46.718	52.124	76.696	-2.313	23.813
82.959	34.861	29.69	-0.836	25.611
45.961	44.578	-10.024	31.42	-4.996
14.977	-10.972	19.943	32.379	-26.525
25.252	-35.024	45.953	111.327	31.046
8.027	-33.69	38.358	131.996	-23.17
63.299	-60.247	-23.106	45.87	9.48
94.363	45.845	75.597	87.908	0.357
5.629	17.478	118.438	115.005	85.728
1.278	0.269	194.198	101.265	107.31
33.985	107.046	201.466	113.581	52.488
9.834	20.246	14.089	79.536	51.658
27.35	51.064	6.149	9.646	8.978
58.034	16.284	-1.498	-17.373	39.956
45.293	-35.314	-3.156	-7.733	45.726
50.168	110.005	64.423	67.568	-48.779
-49.741	84.986	61.335	105.637	57.162
30.73	-2.753	140.612	24.833	15.468
54.471	137.829	111.112	42.002
79.014	133.543	19.435	-50.852	19.949
82.295	24.833	45.471	73.881	52.01
39.248	17.352	23.344	91.363	60.441
63.456	52.577	6.773		39.563
34.698	12.62	58.569	19.946	90.239
60.215	27.962	48.184	15.147	70.832
20.88	76.432	7.609	0.497	69.669
96.164	74.098	4.933	6.3	7.961
118.439	-16.806	47.126	-3.22	31.926
-12.619	35.124	104.595	79.033	88.725
25.027	46.703	128.155	65.552	51.131
44.81	30.614		-1.442	-17.576
8.865	66.596	79.996	-17.416	4.813
88.335	-40.176	11.555	-21.916	36.229
67.397	-28.849	59.622	55.099	15.717
-14.16	-7.053	41.156	8.028	30.248
5.776	1.717	60.083	6.421	54.645
57.44	-33.844	23.84	83.009	35.322
191.851	42.73	6.335	89.285	20.052
72.418	59.078	89.543	6.673	-3.709
-2.095		137.857	46.231	-3.905
7.999	48.508	52.584	9.842	10.277
19.058	20.515	59.767	9.495	21.24
	24.805	32.242	-18.066	24.697
-3.495	28.947	49.381	40.301	15.972
23.724	38.55	52.945	20.439	-27.424
97.158	-9.427	18.655	80.123	26.73
112.268	6.771	20.532	34.306	9.492
2.174	-22.228	46.518	-0.133	150.543
60.676	-13.164	58.063	26.973	115.383
74.838	31.646	72.29	10.192	1.66
-12.056	73.84	96.18	12.995	6.36
20.209	6.142	114.935	-3.332	42.899
0.454	35.215	18.792	27.547	11.507
13.916	47.032	36.416	3.171	5.501
10.034	40.22	31.374	2.956	40.725
22.411	52.451	48.74	71.848	38.044
27.264	41.467	5.865	60.104	66.153
18.125	21.917	30.696	14.978	74.066
-14.187	44.029	58.595	27.803	57.312
14.499	76.204	47.552	44.155	45.464
2.368	61.23	55.352	-18.393	48.726
0.435	39.855	79.635	18.372	45.702
21.321	33.949	80.726	17.358
9.676	72.058	42.193	2.804	65.858
55.506	116.3	72.738	25.248	74.712
5.915	39.617	27.609	24.665	52.122
1.626	8.716	27.503	-1.06	-7.053
34.253	65.238	7.52	7.061	-5.623
48.3	95.568			-11.28
93.452	48.505	90.384	65.941	-0.765
27.526	22.833	18.499	55.636	19.911
86.474	71.766	20.303	22.664	-0.751
27.819	105.274	11.88	18.802	2.056
10.857	51.501	36.116	11.584	57.692
157.995	23.457	32.48	96.658	72.387
101.923	-6.392	19.822	37.446	3.063
39.512	21.876	16.77	25.162	25.602
94.021	-2.692	4.657	66.641	-19.641
78.597	12.401	-14.895	82.722	23.984
25.405	2.882	-1.776	18.723	19.243
52.049	68.14	29.42	14.286	30.412
33.457	31.376	22.93	39.887	23.167
35.148	-0.405	19.905	17.918	2.22
51.807	32.136	34.35	17.947	22.619
70.601	38.929	9.573	54.338
47.938	105.497	48.37	55.963	-18.162
45.177	57.329	24.105	34.492	-19.56
2.144	14.733	11.695	57.174	25.713
9.061		26.858	39.73	34.444
43.056	55.438	12.104	36.637	-9.501
	21.374	15.501	7.395	12.286
170.909	16.323	43.071	39.356	99.648
135.729	24.457	19.884	48.366	95.114
33.881	13.445	4.45	7.901	0.906
99.718	54.644	21.103	5.14	2.328
40.744	78.407	68.977	-14.082	-4.614
18.485	10.434		9.217	3.474
39.581	-14.18	53.21	15.059	52.311
39.83	55.295	61.503	65.872	57.225
38.022	47.273	47.672	25.554	46.456
37.559	40.118	33.111	10.973	7.985
67.756	10.056	65.941	7.356	34.505
74.47	49.051	54.251	40.124	70.112
142.29	1.621	28.689	57.735	42.94
55.097	-20.194	17.806	24.87	36.96
85.598	-31.404	25.856	18.957	20.925
75.815	30.429	18.614	68.264	14.108
81.954	37.362	33.567	45.282	47.349
119.469	24.359	26.976	0.762	50.463
48.35	37.888	38.984	20.195	9.443
72.456	-12.131	70.522	-5.163	70.139
80.932	35.921	87.389	6.347	26.503
39.12	-11.615	64.415	81.418	37.899
56.705	-3.924	66.872	42.212
60.874	15.915	15.198	58.184
43.211	37.493	22.253	82.737
11.578	51.162	1.938	79.877
-8.186	45.25	17.544	35.802
49.857	7.162	41.627	45.827
32.708	47.539	29.813	40.755
95.049	17.488	30.89
68.267	31.8	20.014	58.83
116.746	33.774		57.49
112.26	5.341		93.798
26.171	50.804		73.995
44.223	28.158		9.682
52.724	1.081		23.267
69.526	10.477		47.465
41.104	-2.838		38.43
185.576	6.57		7.76
94.638	54.885		91.374
128.577	-4.584		95.648
108.369	4.329		19.146
79.707	-20.12		24.232
48.469	16.993		2.782
9.882	-10.859		30.895
59.973	16.375		7.303
19.129	48.19		13.666
	19.114		24.222
20.464	30.856		25.198
14.191	4.777		34.277
9.233			27.604
47.532	40.739		51.821
48.006	-20.941
17.331	23.819
85.487	55.225
67.057	55.972
62.857	27.092
80.122	36.008
18.038	3.895
48.439	2.729
13.732	49.868
-20.203	-4.475
-8.748	-11.201
73.093	23.857
5.686	-19.104
	22.836
	8.9
	-31.892
	5.969
	-7.099
