# Supplementary material for: Flower/FLWR-1 regulates neuronal activity via the plasma membrane Ca2+ ATPase to promote recycling of synaptic vesicles
Source: eLife. 2025 May 20;13:RP103870. doi: 10.7554/eLife.103870 (PMC12092002; doi:10.7554/eLife.103870)
Supplement: Figure 9—figure supplement 1—source data 1. [file elife-103870-fig9-figsupp1-data1.xlsx]

## Sheet: FigS9_1
wild type	FLWR-1 + MCA-3b	FLWR-1 + NRA-2	flwr-1	mca-3
118	116	102	60	110
108	102	108	92	80
118	108	100	96	100
110	112	114	90	8
112	106	88	100	98
106	100	108	102	68
106	94	92	102	18
94	102	116	80	10
114	110	112	88	74
120		130	106	52
106	110	122	88	76
106	100	128	100	100
112	82	120	74	110
114	82		78	98
120	86	88	68	78
116	90	98	106	96
120	106	102	36	94
116		94	82	64
116		96	98	86
104		90	88	4
102		88	108	6
		78	94	50
102		98	106	66
106		78	114	2
96		96	96	18
86		96	76	38
92		94	112	10
86		110	102	96
94		86	104	66
92		98	104	118
98			102	86
100			106	74
108			114	82
96			102	72
92			106	96
94			96	92
94			74	76
98			106	68
100			106	88
88			102	10
90				68
92				78
82
100
102
96
104
100
104
112
96
90
88
98
86
106
92
94
108
82
96
90
88
94
98
98
106
98
88
90
100
88
88
108
78
80
96
98
88
88
96
90
94
14
112
90
88
94
98
108
76
