# Supplementary material for: Flower/FLWR-1 regulates neuronal activity via the plasma membrane Ca2+ ATPase to promote recycling of synaptic vesicles
Source: eLife. 2025 May 20;13:RP103870. doi: 10.7554/eLife.103870 (PMC12092002; doi:10.7554/eLife.103870)
Supplement: Figure 9—source data 1. [file elife-103870-fig9-data1.xlsx]

## Sheet: Fig9D+E
Sum of puncta + interpuncta			Puncta/interpuncta ratio
wild type	flwr-1		wild type	flwr-1
953.135	283.352		1.97659	1.81632
419.716	812.177		1.71474	1.40587
492.71	382.749		2.00089	1.31262
849.569	284.169		1.83501	1.61129
774.231	503.913		2.55195	1.46156
387.711	299.845		1.82019	1.58784
569.432	303.132		1.72365	1.94036
491.173	618.944		2.25753	1.70734
400.587	220.93		1.87588	2.03198
495.783	317.337		1.52899	1.76855
787.065	100.235		1.87762	2.10622
602.693	759.611		1.83889	1.11133
318.739	378.581		2.1715	1.51726
	681.822			1.55893
396.373			1.91569
283.316	165.949		2.15301	1.95842
650.201	374.081		1.67257	1.9191
435.428	381.235		1.55987	1.3313
417.593	354.776		1.65367	1.59442
465	738.619		1.47165	1.37074
457.55	494.319		2.55007	1.35285
294.89	190.996		1.80852	2.08515
344.753	404.827		1.81156	1.56188
287.668	559.89		1.90438	1.61654
453.853	231.425		2.12405	2.33763
432.254	526.299		1.96398	1.37928
501.558	731.732		2.05315	1.36629
688.004	702.901		1.53431	1.49702
905.545	887.688		1.59293	2.1894
492.302	726.805		2.4034	1.78843
944.909	341.929		1.83769	2.00136
451.349	300.656		1.85943	2.85908
685.775	2189.61		2.15601	1.2645
283.818	719.226		2.07037	1.16616
420.046	488.592		2.26702	1.40818
515.081	620.094		2.04045	1.61088
